# Supplementary material
Source: PubMed Central journal article supplement (PMC10979459)

# Efficient platform for synthesizing comprehensive heparan sulfate oligosaccharide libraries for decoding glycosaminoglycan–protein interactions

---

In the format provided by the authors and unedited

*Supplementary Information for*

Efficient Platform for Synthesizing Comprehensive Heparan Sulfate  
Oligosaccharide Libraries for Decoding Glycosaminoglycan-Protein Interactions

Lei Wang<sup>1</sup>, Alexander W. Sorum<sup>1</sup>, Bo-Shun Huang<sup>1</sup>, Mallory K. Kern<sup>2</sup>, Guowei Su<sup>3</sup>, Nitin Pawar<sup>1</sup>, Xuefei Huang<sup>4</sup>, Jian Liu<sup>5</sup>, Nicola L. B. Pohl<sup>2</sup> and Linda C. Hsieh-Wilson<sup>1</sup>✉

**TABLE OF CONTENTS:**

|                                                   |     |
|---------------------------------------------------|-----|
| 1. Supporting Figures                             | 2   |
| 2. Supporting Tables                              | 10  |
| 3. Synthetic procedures and characterization data | 13  |
| 3-1. General Methods                              | 13  |
| 3-2. Synthesis and Characterization of Compounds  | 20  |
| 4. References                                     | 170 |
| 5. Nuclear Magnetic Resonance (NMR) Spectra       | 171 |

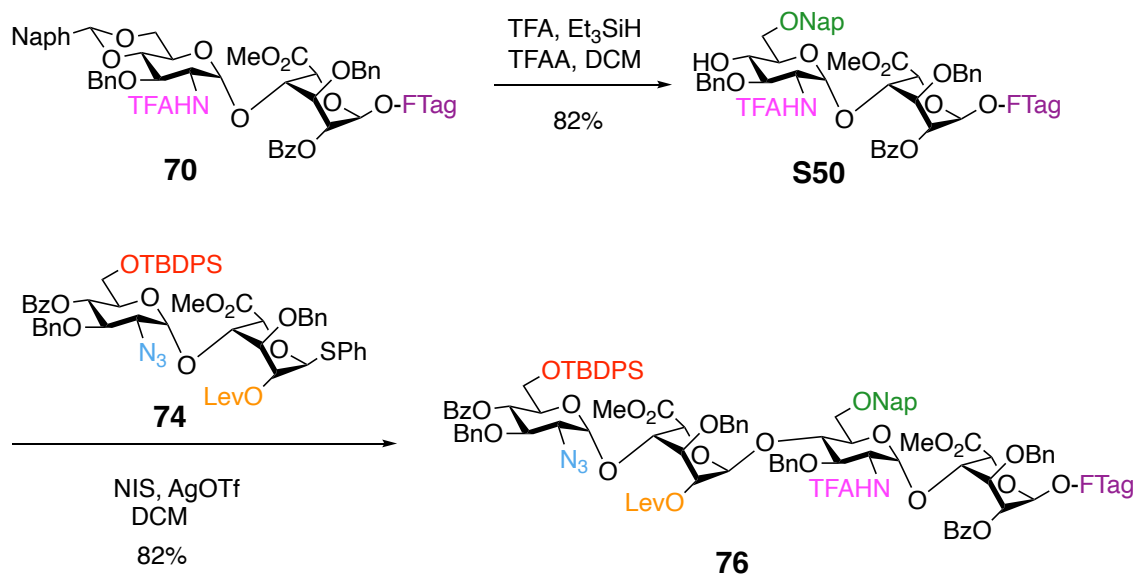

**Supplementary Figure 1.** Alternative synthetic route to tetrasaccharide **76**.

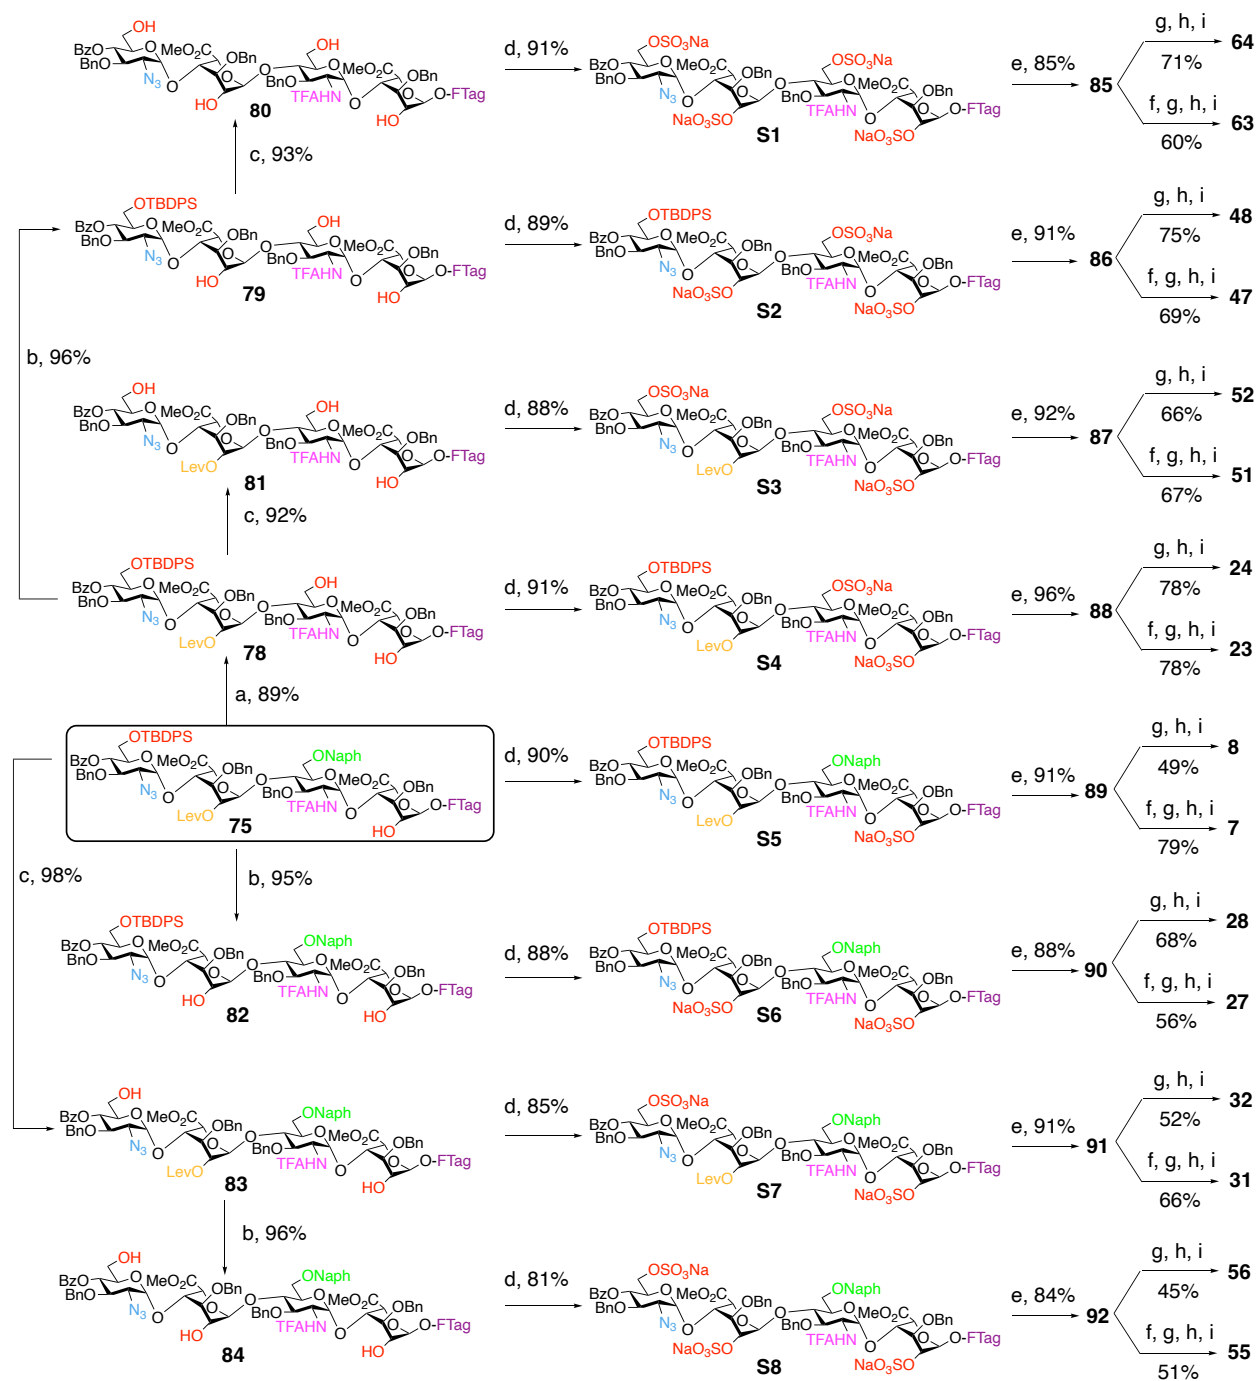

**Supplementary Figure 2.** Synthesis of HS sub-library NS(2)-2OS(1). Reagents and conditions: (a) DDQ, DCE, MeOH, PBS, rt. (b) hydrazine acetate, MeOH, DCM, rt. (c) HF·Py, pyridine, 0 °C to rt. (d) SO<sub>3</sub>·Et<sub>3</sub>N, DMF, 50 °C. (e) 1 M LiOH, MeOH, THF, 40 °C. (f) Ac<sub>2</sub>O, TEA, MeOH, rt. (g) PMe<sub>3</sub>, NaOH, THF, rt. (h) SO<sub>3</sub>·Py, NaOH, TEA, TFE, MeOH, rt. (i) Pd(OH)<sub>2</sub>, H<sub>2</sub>, *t*-BuOH, H<sub>2</sub>O, rt.

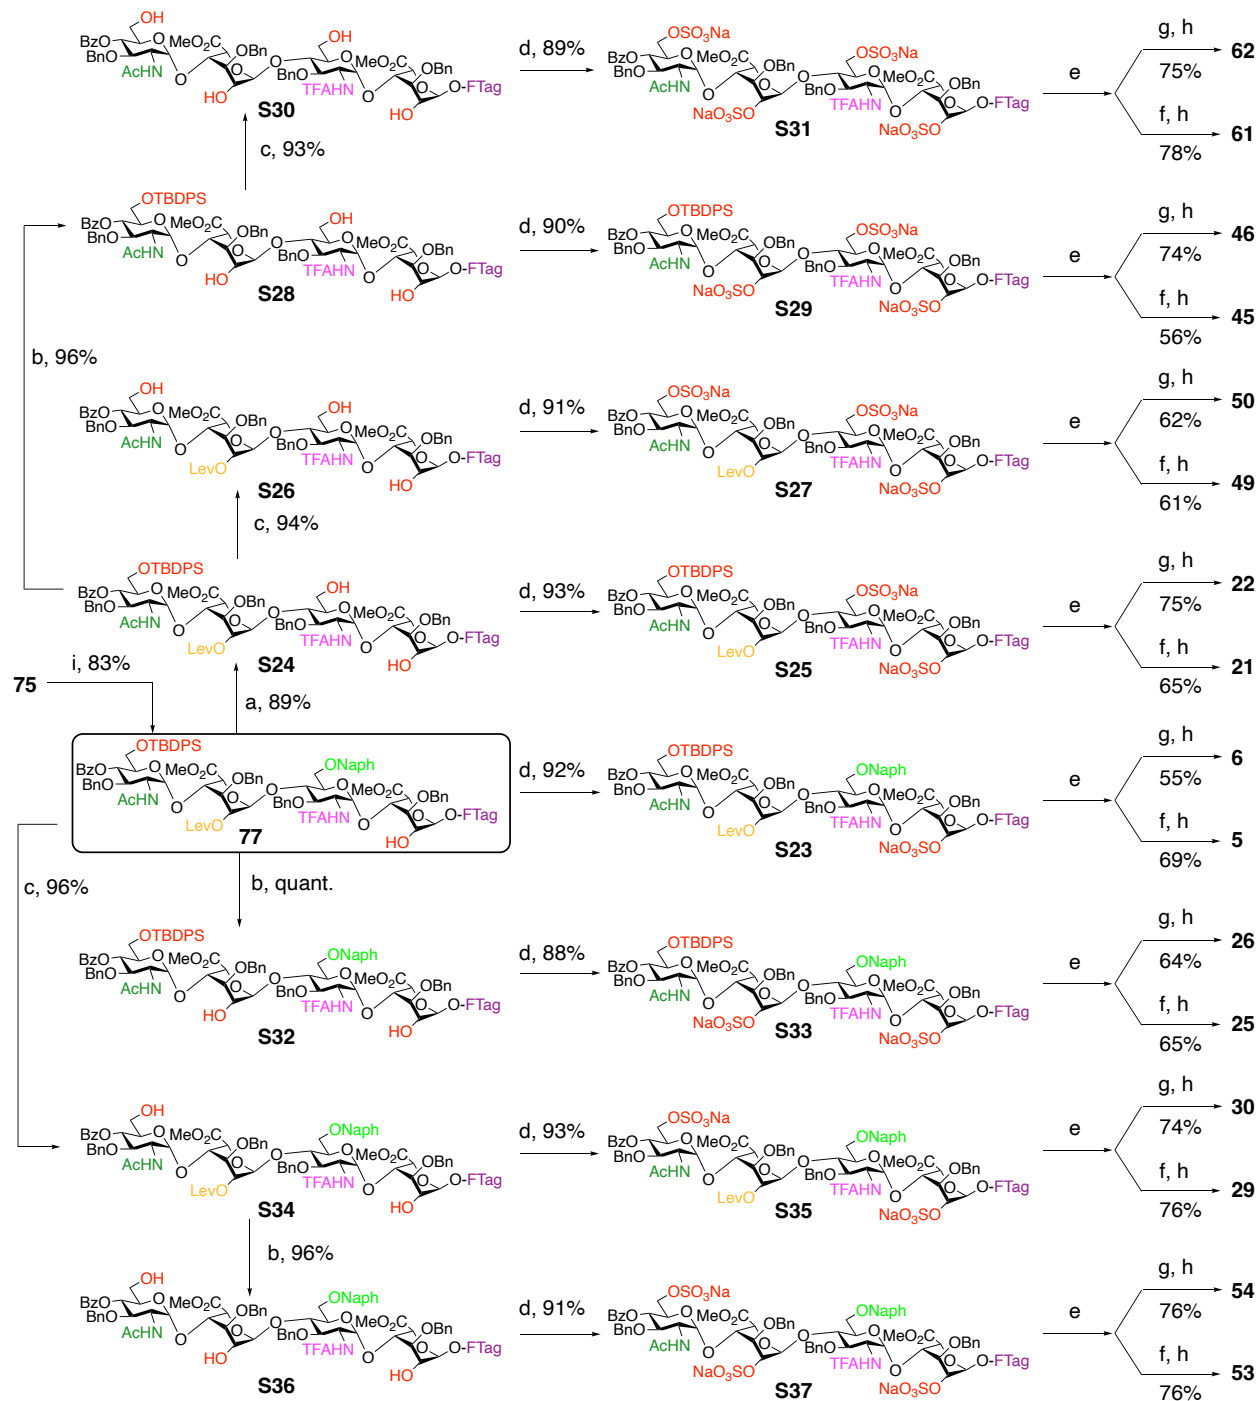

**Supplementary Figure 3.** Synthesis of HS sub-library NAc(2)-2OS(1). Reagents and conditions: (a) DDQ, DCE, MeOH, PBS, rt. (b) hydrazine acetate, MeOH, DCM, rt. (c) HF·Py, pyridine, 0 °C to rt. (d) SO<sub>3</sub>·Et<sub>3</sub>N, DMF, 50 °C. (e) 1 M LiOH, MeOH, THF, 40 °C. (f) Ac<sub>2</sub>O, TEA, MeOH, rt. (g) SO<sub>3</sub>·Py, NaOH, TEA, TFE, MeOH, rt. (h) Pd(OH)<sub>2</sub>, H<sub>2</sub>, *t*-BuOH, H<sub>2</sub>O, rt. (i) AcSH, pyridine, rt. 16h.

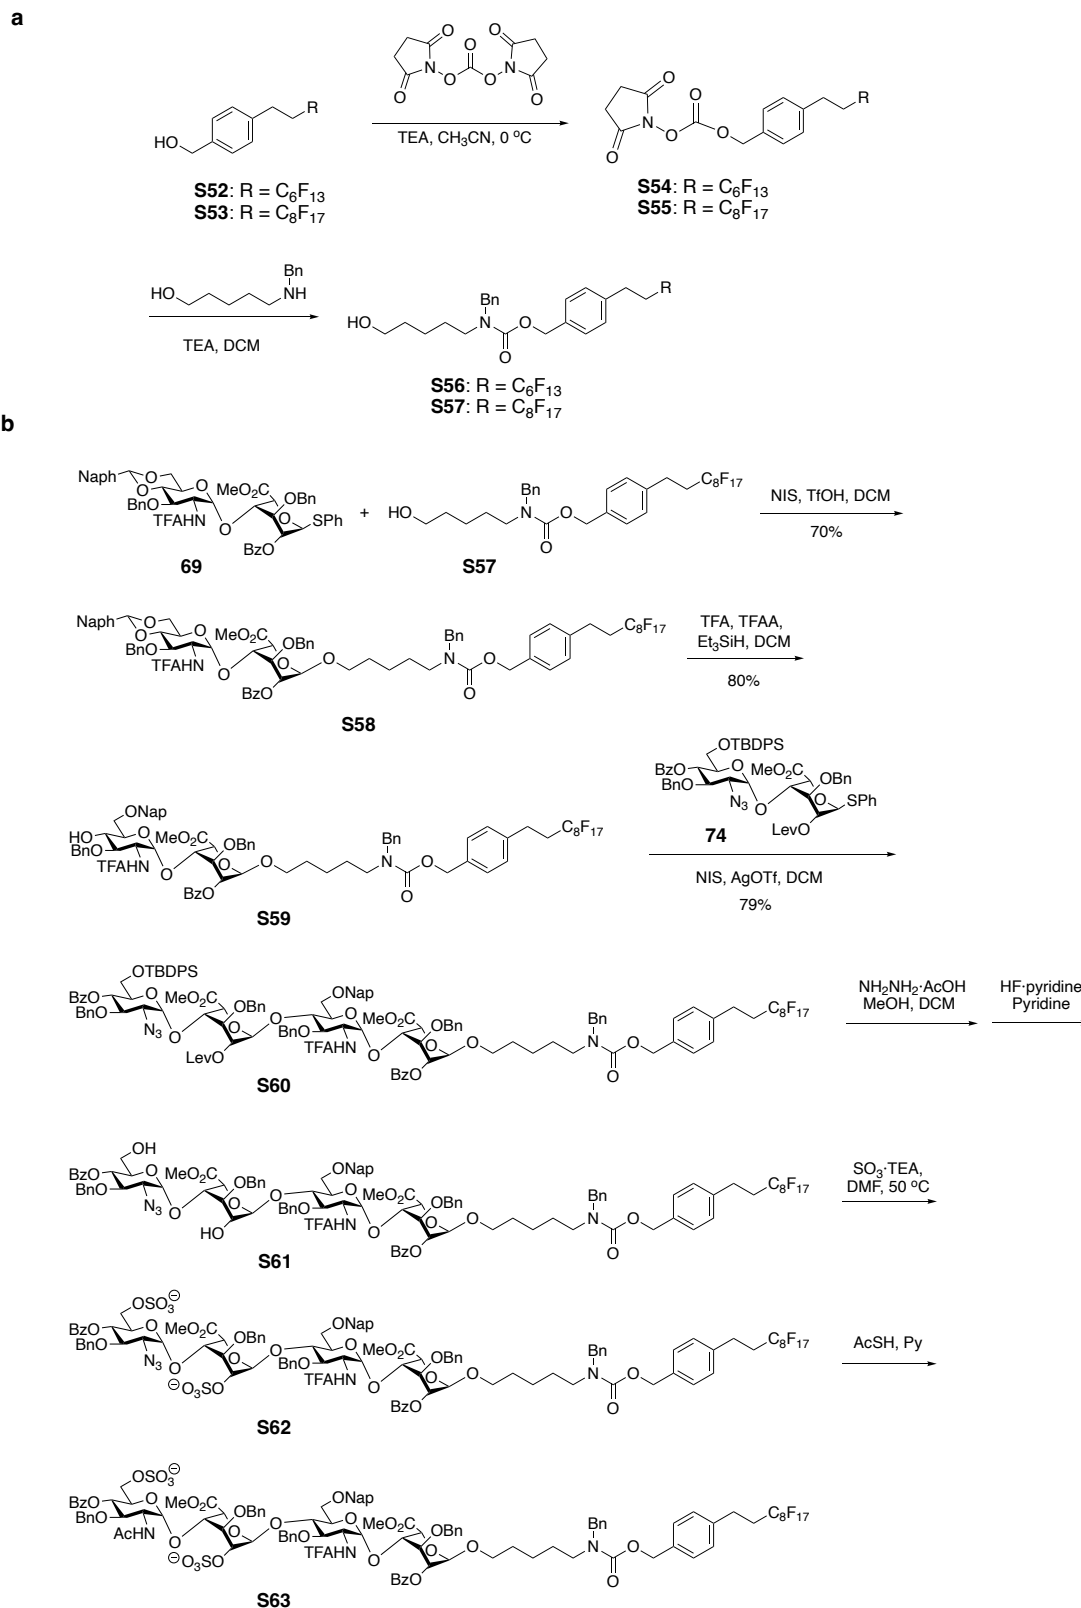

**Supplementary Figure 4.** (a) Synthesis of the C<sub>6</sub>F<sub>13</sub> linker **S56** and C<sub>8</sub>F<sub>17</sub> linker **S57**. (b) Synthesis of tetrasaccharide **S63** with the C<sub>8</sub>F<sub>17</sub> linker.

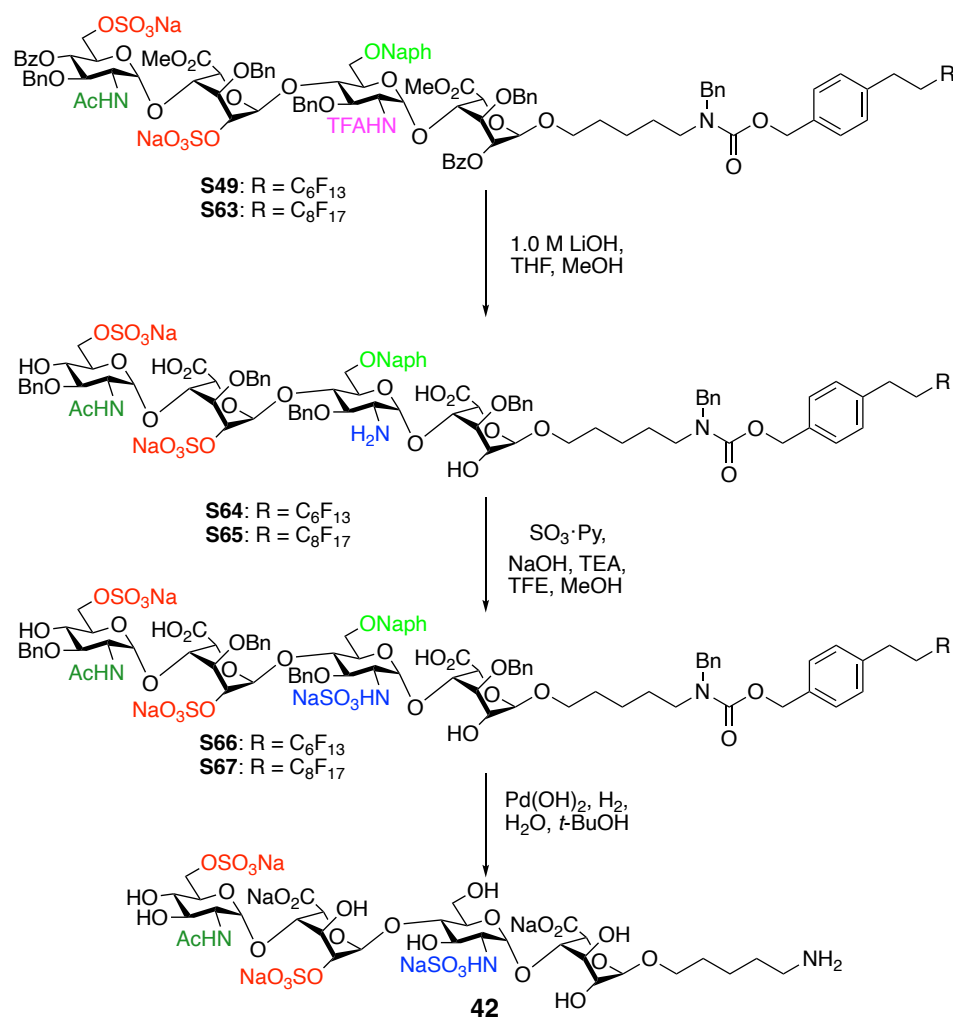

|                                        | Reaction time (Hydrolysis) | Reaction time (N-Sulfation) | SO <sub>3</sub> Py | Yields (Three steps) |
|----------------------------------------|----------------------------|-----------------------------|--------------------|----------------------|
| <b>R = C<sub>6</sub>F<sub>13</sub></b> | 24 h                       | 12 h                        | 30 eq              | 64%                  |
| <b>R = C<sub>8</sub>F<sub>17</sub></b> | 35 h                       | 18 h                        | 45 eq              | 62%                  |

**Supplementary Figure 5.** Comparison between the C<sub>6</sub>F<sub>13</sub> and C<sub>8</sub>F<sub>17</sub> F-tags.

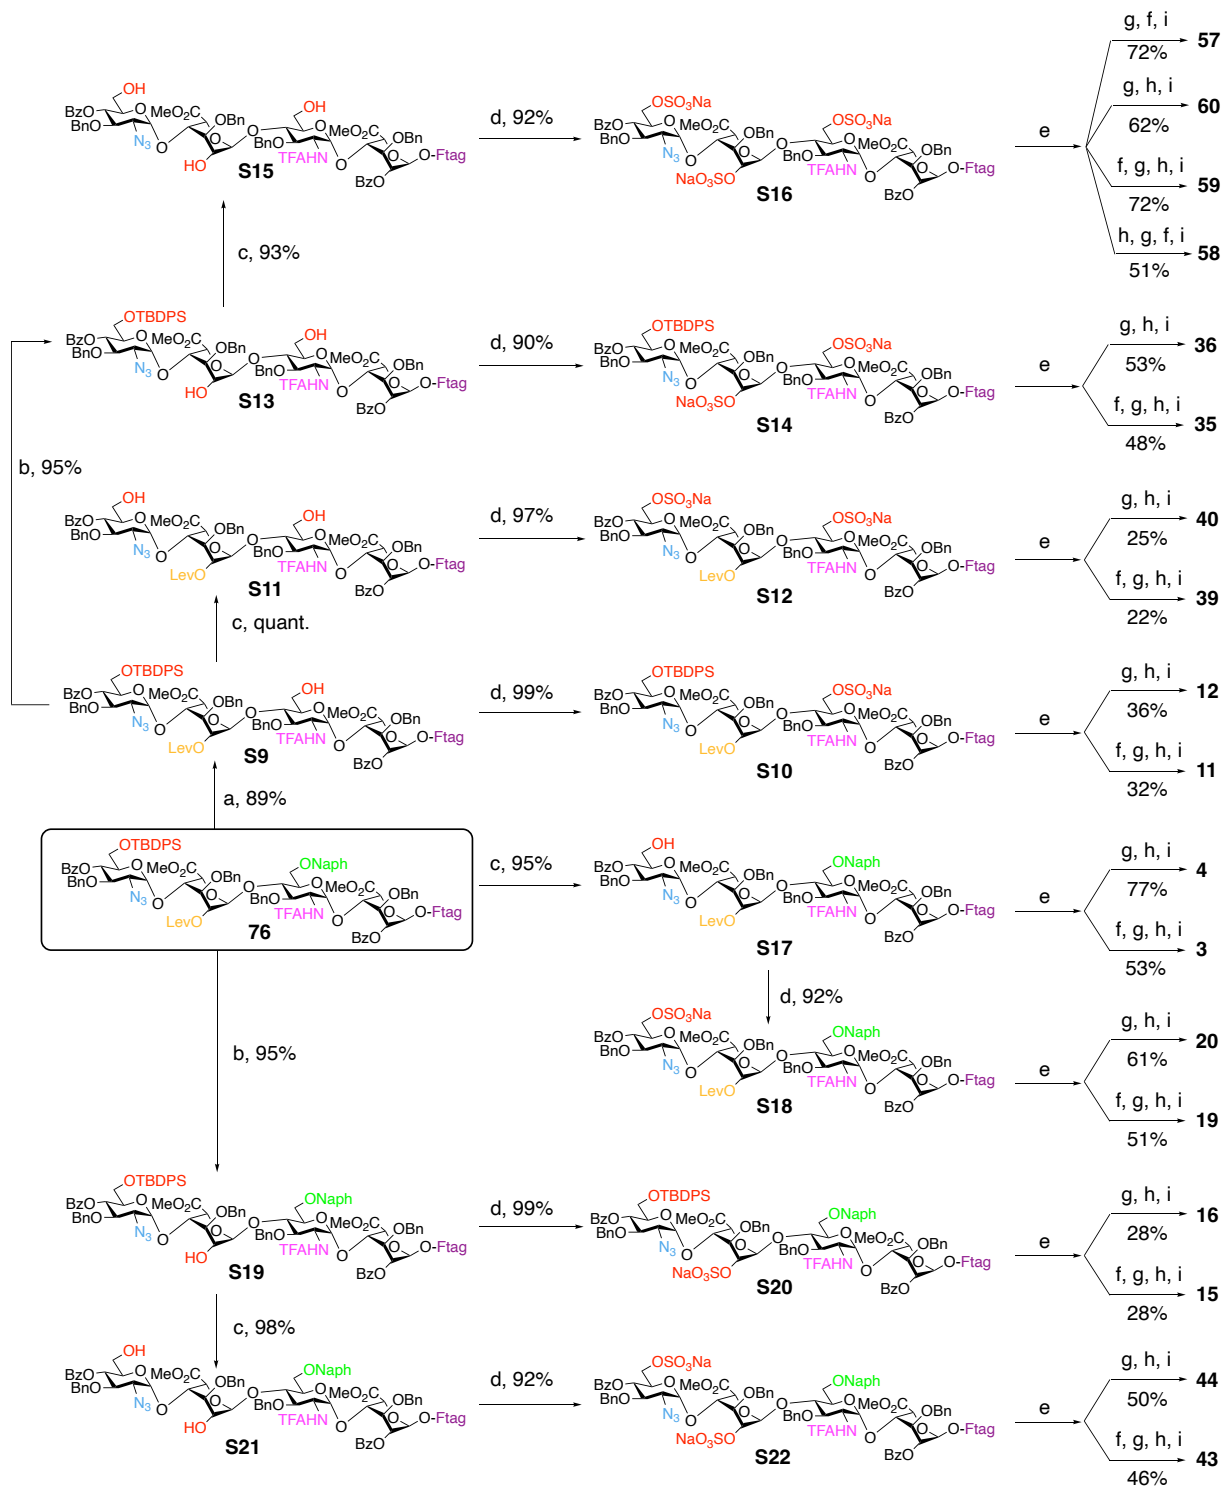

**Supplementary Figure 6.** Synthesis of HS sub-library NS(2)-2OH(1) and compounds 57-58. Reagents and conditions: (a) DDQ, DCE, MeOH, PBS, rt. (b) hydrazine acetate, MeOH, DCM, rt. (c) HF·Py, pyridine, 0 °C to rt. (d) SO<sub>3</sub>·Et<sub>3</sub>N, DMF, 50 °C. (e) 1 M LiOH, MeOH, THF, rt. (f) Ac<sub>2</sub>O, TEA, MeOH, 40 °C. (g) PMe<sub>3</sub>, NaOH, THF, rt. (h) SO<sub>3</sub>·Py, NaOH, TEA, TFE, MeOH, rt. (i) Pd(OH)<sub>2</sub>, H<sub>2</sub>, *t*-BuOH, H<sub>2</sub>O, rt.



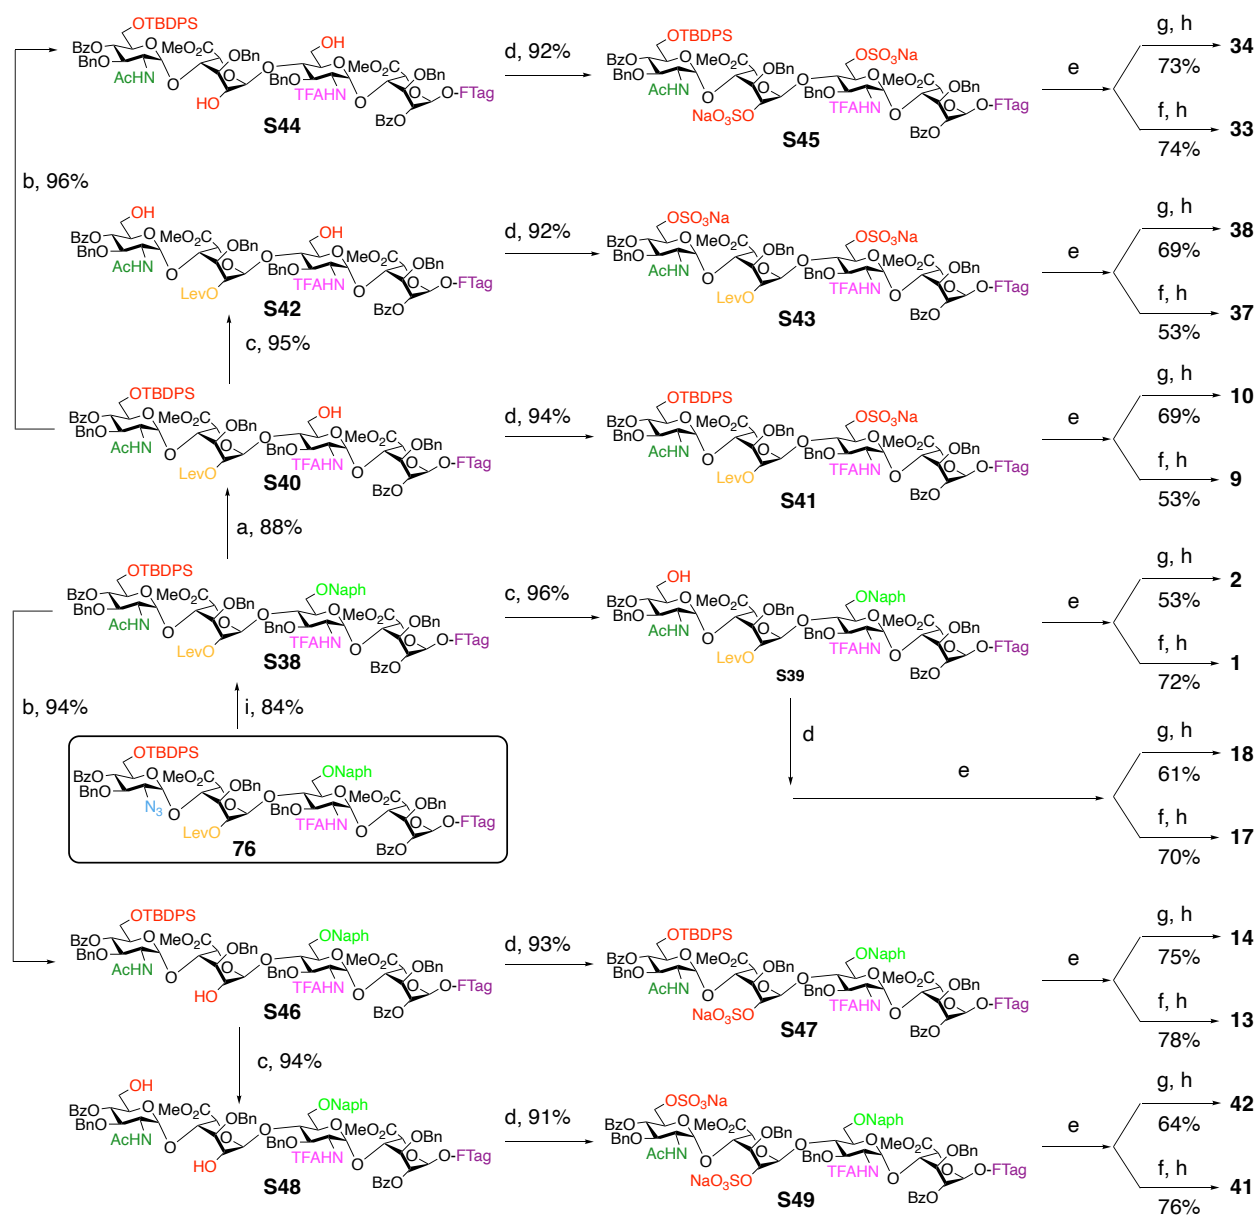

**Supplementary Figure 7.** Synthesis of HS sub-library NAc(2)-2OH(1). (a) DDQ, DCE, MeOH, PBS, rt. (b) hydrazine acetate, MeOH, DCM, rt. (c) HF·Py, pyridine, 0 °C to rt. (d) SO<sub>3</sub>·Et<sub>3</sub>N, DMF, 50 °C. (e) 1 M LiOH, MeOH, THF, 40 °C. (f) Ac<sub>2</sub>O, TEA, MeOH, rt. (g) SO<sub>3</sub>·Py, NaOH, TEA, TFE, MeOH, rt. (h) Pd(OH)<sub>2</sub>, H<sub>2</sub>, *t*-BuOH, H<sub>2</sub>O, rt. (i) AcSH, pyridine, rt, 16 h.

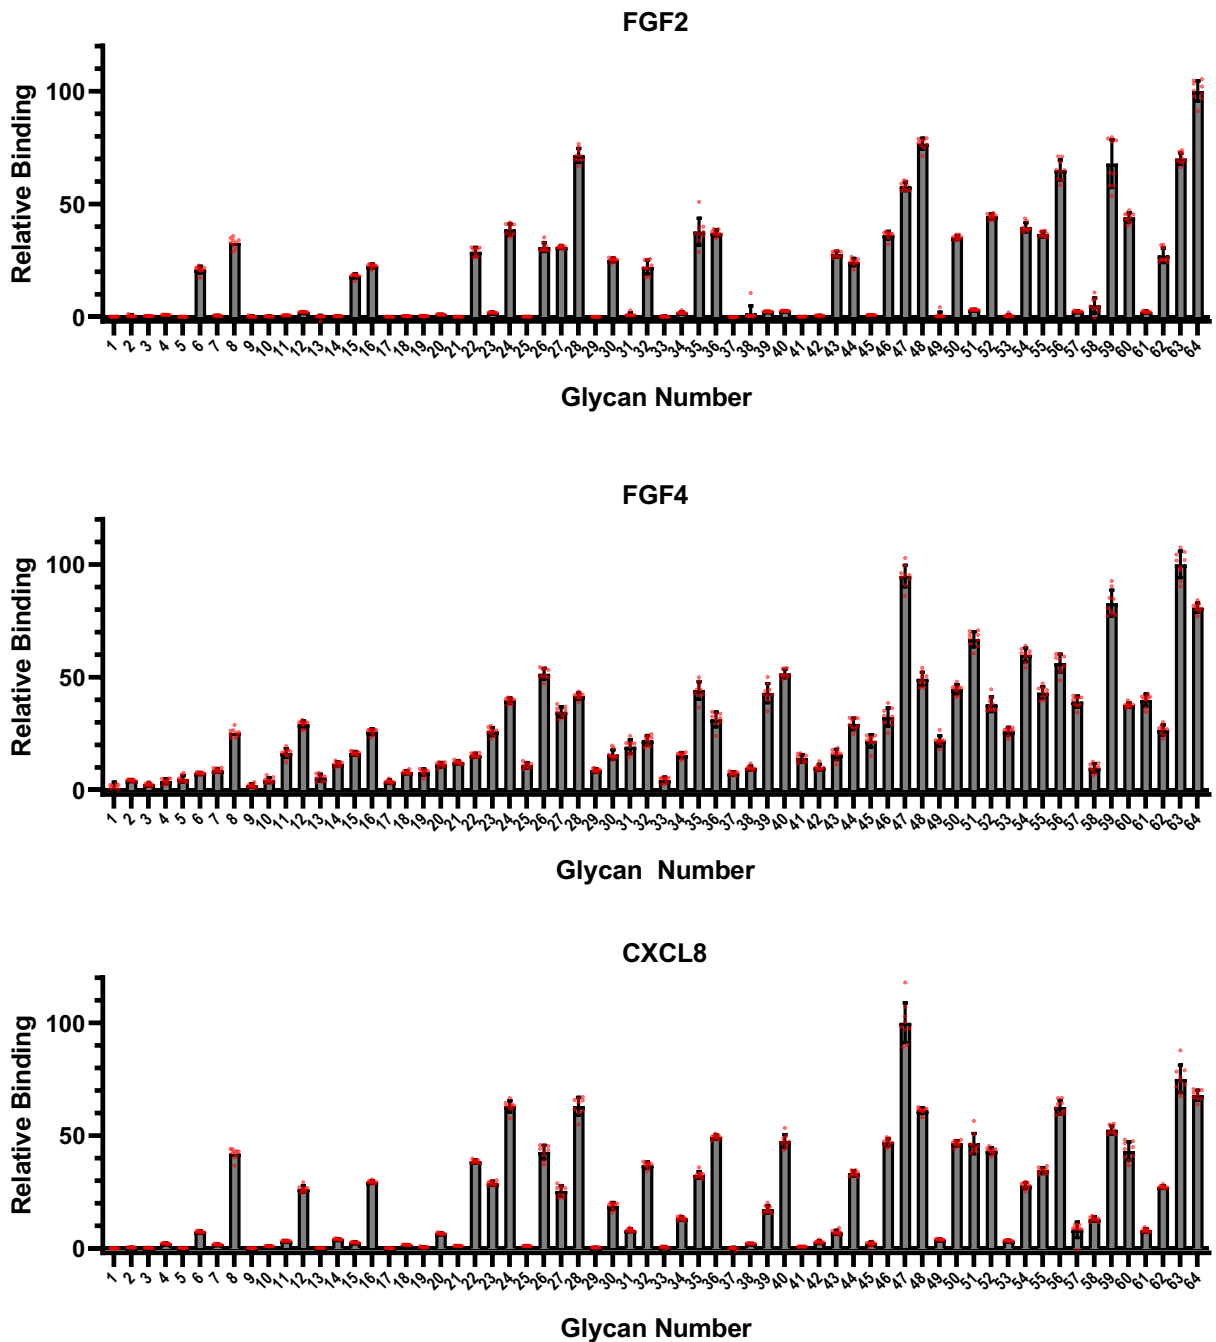

**Supplementary Figure 8.** Relative binding of FGF2, FGF4 and CXCL8 (from top to bottom) to the tetrasaccharide arrays. The fluorescence intensities were corrected for background and normalized with respect to the highest intensity on the array. Bar graphs represent the mean  $\pm$  SD for each compound in nonuplicate. Individual data points are shown as red dots.

**Supplementary Table 1. Structures and purities of HS tetrasaccharides 1-64.**

| Compd. No. | Structure                   | Purity | Compd. No. | Structure                       | Purity |
|------------|-----------------------------|--------|------------|---------------------------------|--------|
| 1          | GlcNAc-IdoA-GlcNAc-IdoA     | >95%   | 33         | GlcNAc-IdoA2S-GlcNAc6S-IdoA     | >95%   |
| 2          | GlcNAc-IdoA-GlcNS-IdoA      | >95%   | 34         | GlcNAc-IdoA2S-GlcNS6S-IdoA      | >95%   |
| 3          | GlcNS-IdoA-GlcNAc-IdoA      | >95%   | 35         | GlcNS-IdoA2S-GlcNAc6S-IdoA      | >95%   |
| 4          | GlcNS-IdoA-GlcNS-IdoA       | >95%   | 36         | GlcNS-IdoA2S-GlcNS6S-IdoA       | 90%    |
| 5          | GlcNAc-IdoA-GlcNAc-IdoA2S   | 95%    | 37         | GlcNAc6S-IdoA-GlcNAc6S-IdoA     | 95%    |
| 6          | GlcNAc-IdoA-GlcNS-IdoA2S    | 95%    | 38         | GlcNAc6S-IdoA-GlcNS6S-IdoA      | 95%    |
| 7          | GlcNS-IdoA-GlcNAc-IdoA2S    | 95%    | 39         | GlcNS6S-IdoA-GlcNAc6S-IdoA      | 93%    |
| 8          | GlcNS-IdoA-GlcNS-IdoA2S     | 95%    | 40         | GlcNS6S-IdoA-GlcNS6S-IdoA       | 95%    |
| 9          | GlcNAc-IdoA-GlcNAc6S-IdoA   | >95%   | 41         | GlcNAc6S-IdoA2S-GlcNAc-IdoA     | 94%    |
| 10         | GlcNAc-IdoA-GlcNS6S-IdoA    | 95%    | 42         | GlcNAc6S-IdoA2S-GlcNS-IdoA      | 95%    |
| 11         | GlcNS-IdoA-GlcNAc6S-IdoA    | 94%    | 43         | GlcNS6S-IdoA2S-GlcNAc-IdoA      | 90%    |
| 12         | GlcNS-IdoA-GlcNS6S-IdoA     | 95%    | 44         | GlcNS6S-IdoA2S-GlcNS-IdoA       | 92%    |
| 13         | GlcNAc-IdoA2S-GlcNAc-IdoA   | 95%    | 45         | GlcNAc-IdoA2S-GlcNAc6S-IdoA2S   | 95%    |
| 14         | GlcNAc-IdoA2S-GlcNS-IdoA    | 94%    | 46         | GlcNAc-IdoA2S-GlcNS6S-IdoA2S    | 95%    |
| 15         | GlcNS-IdoA2S-GlcNAc-IdoA    | 92%    | 47         | GlcNS-IdoA2S-GlcNAc6S-IdoA2S    | 88%    |
| 16         | GlcNS-IdoA2S-GlcNS-IdoA     | 92%    | 48         | GlcNS-IdoA2S-GlcNS6S-IdoA2S     | >95%   |
| 17         | GlcNAc6S-IdoA-GlcNAc-IdoA   | >95%   | 49         | GlcNAc6S-IdoA-GlcNAc6S-IdoA2S   | 91%    |
| 18         | GlcNAc6S-IdoA-GlcNS-IdoA    | 93%    | 50         | GlcNAc6S-IdoA-GlcNS6S-IdoA2S    | 90%    |
| 19         | GlcNS6S-IdoA-GlcNAc-IdoA    | >95%   | 51         | GlcNS6S-IdoA-GlcNAc6S-IdoA2S    | 91%    |
| 20         | GlcNS6S-IdoA-GlcNS-IdoA     | 94%    | 52         | GlcNS6S-IdoA-GlcNS6S-IdoA2S     | >95%   |
| 21         | GlcNAc-IdoA-GlcNAc6S-IdoA2S | 94%    | 53         | GlcNAc6S-IdoA2S-GlcNAc-IdoA2S   | >95%   |
| 22         | GlcNAc-IdoA-GlcNS6S-IdoA2S  | 95%    | 54         | GlcNAc6S-IdoA2S-GlcNS-IdoA2S    | 94%    |
| 23         | GlcNS-IdoA-GlcNAc6S-IdoA2S  | 91%    | 55         | GlcNS6S-IdoA2S-GlcNAc-IdoA2S    | 90%    |
| 24         | GlcNS-IdoA-GlcNS6S-IdoA2S   | 93%    | 56         | GlcNS6S-IdoA2S-GlcNS-IdoA2S     | 90%    |
| 25         | GlcNAc-IdoA2S-GlcNAc-IdoA2S | 93%    | 57         | GlcNAc6S-IdoA2S-GlcNAc6S-IdoA   | 91%    |
| 26         | GlcNAc-IdoA2S-GlcNS-IdoA2S  | 94%    | 58         | GlcNAc6S-IdoA2S-GlcNS6S-IdoA    | 82%    |
| 27         | GlcNS-IdoA2S-GlcNAc-IdoA2S  | 95%    | 59         | GlcNS6S-IdoA2S-GlcNAc6S-IdoA    | 94%    |
| 28         | GlcNS-IdoA2S-GlcNS-IdoA2S   | 94%    | 60         | GlcNS6S-IdoA2S-GlcNS6S-IdoA     | 90%    |
| 29         | GlcNAc6S-IdoA-GlcNAc-IdoA2S | 86%    | 61         | GlcNAc6S-IdoA2S-GlcNAc6S-IdoA2S | 94%    |
| 30         | GlcNAc6S-IdoA-GlcNS-IdoA2S  | 92%    | 62         | GlcNAc6S-IdoA2S-GlcNS6S-IdoA2S  | 92%    |
| 31         | GlcNS6S-IdoA-GlcNAc-IdoA2S  | 95%    | 63         | GlcNS6S-IdoA2S-GlcNAc6S-IdoA2S  | 93%    |
| 32         | GlcNS6S-IdoA-GlcNS-IdoA2S   | 95%    | 64         | GlcNS6S-IdoA2S-GlcNS6S-IdoA2S   | 93%    |

**Supplementary Table 2.** Structures, relative binding, and standard deviation (s.d.) of HS tetrasaccharides to FGF2, FGF4, and CXCL8.

| Cmpd | Structure                   | FGF2<br>Rel.<br>binding | s.d. | FGF4<br>Rel.<br>binding | s.d. | CXCL8<br>Rel.<br>binding | s.d. |
|------|-----------------------------|-------------------------|------|-------------------------|------|--------------------------|------|
| 1    | GlcNAc-IdoA-GlcNAc-IdoA     | 0.1                     | 0.1  | 0.6                     | 2.8  | 0.1                      | 0.0  |
| 2    | GlcNAc-IdoA-GlcNS-IdoA      | 0.4                     | 0.3  | 4.3                     | 0.4  | 0.4                      | 0.1  |
| 3    | GlcNS-IdoA-GlcNAc-IdoA      | 0.5                     | 0.1  | 2.4                     | 0.6  | 0.2                      | 0.1  |
| 4    | GlcNS-IdoA-GlcNS-IdoA       | 0.9                     | 0.1  | 4.0                     | 1.1  | 2.1                      | 0.3  |
| 5    | GlcNAc-IdoA-GlcNAc-IdoA2S   | 0.1                     | 0.1  | 4.9                     | 1.4  | 0.2                      | 0.1  |
| 6    | GlcNAc-IdoA-GlcNS-IdoA2S    | 20.6                    | 1.3  | 7.5                     | 0.4  | 7.4                      | 0.4  |
| 7    | GlcNS-IdoA-GlcNAc-IdoA2S    | 0.6                     | 0.2  | 8.8                     | 0.8  | 1.7                      | 0.2  |
| 8    | GlcNS-IdoA-GlcNS-IdoA2S     | 31.9                    | 1.8  | 25.3                    | 1.8  | 41.9                     | 2.3  |
| 9    | GlcNAc-IdoA-GlcNAc6S-IdoA   | 0.2                     | 0.3  | 2.0                     | 0.8  | 0.1                      | 0.1  |
| 10   | GlcNAc-IdoA-GlcNS6S-IdoA    | 0.2                     | 0.1  | 4.4                     | 1.2  | 1.0                      | 0.1  |
| 11   | GlcNS-IdoA-GlcNAc6S-IdoA    | 0.7                     | 0.1  | 16.5                    | 2.0  | 3.3                      | 0.2  |
| 12   | GlcNS-IdoA-GlcNS6S-IdoA     | 2.2                     | 0.1  | 29.2                    | 1.6  | 26.3                     | 1.4  |
| 13   | GlcNAc-IdoA2S-GlcNAc-IdoA   | 0.0                     | 0.7  | 5.5                     | 1.6  | 0.2                      | 0.1  |
| 14   | GlcNAc-IdoA2S-GlcNS-IdoA    | 0.4                     | 0.1  | 11.6                    | 0.9  | 4.1                      | 0.2  |
| 15   | GlcNS-IdoA2S-GlcNAc-IdoA    | 17.6                    | 0.8  | 16.4                    | 0.8  | 2.6                      | 0.2  |
| 16   | GlcNS-IdoA2S-GlcNS-IdoA     | 21.2                    | 0.6  | 25.9                    | 1.3  | 29.5                     | 0.6  |
| 17   | GlcNAc6S-IdoA-GlcNAc-IdoA   | 0.0                     | 0.1  | 3.7                     | 0.7  | 0.1                      | 0.0  |
| 18   | GlcNAc6S-IdoA-GlcNS-IdoA    | 0.4                     | 0.1  | 7.9                     | 0.7  | 1.6                      | 0.1  |
| 19   | GlcNS6S-IdoA-GlcNAc-IdoA    | 0.4                     | 0.2  | 8.0                     | 1.4  | 0.6                      | 0.2  |
| 20   | GlcNS6S-IdoA-GlcNS-IdoA     | 1.1                     | 0.2  | 11.3                    | 1.0  | 6.6                      | 0.3  |
| 21   | GlcNAc-IdoA-GlcNAc6S-IdoA2S | 0.1                     | 0.0  | 12.3                    | 0.7  | 1.1                      | 0.1  |
| 22   | GlcNAc-IdoA-GlcNS6S-IdoA2S  | 29.2                    | 1.8  | 15.5                    | 0.8  | 38.6                     | 0.7  |
| 23   | GlcNS-IdoA-GlcNAc6S-IdoA2S  | 2.0                     | 0.1  | 25.9                    | 1.8  | 28.9                     | 0.8  |
| 24   | GlcNS-IdoA-GlcNS6S-IdoA2S   | 38.2                    | 2.2  | 39.6                    | 1.2  | 62.9                     | 2.5  |
| 25   | GlcNAc-IdoA2S-GlcNAc-IdoA2S | 0.2                     | 0.0  | 10.9                    | 1.3  | 1.0                      | 0.1  |
| 26   | GlcNAc-IdoA2S-GlcNS-IdoA2S  | 30.9                    | 2.2  | 51.5                    | 2.4  | 42.7                     | 3.1  |
| 27   | GlcNS-IdoA2S-GlcNAc-IdoA2S  | 30.3                    | 0.6  | 34.6                    | 2.3  | 25.4                     | 2.4  |
| 28   | GlcNS-IdoA2S-GlcNS-IdoA2S   | 68.1                    | 2.5  | 41.7                    | 1.4  | 63.0                     | 3.9  |
| 29   | GlcNAc6S-IdoA-GlcNAc-IdoA2S | 0.0                     | 0.0  | 8.8                     | 0.7  | 0.4                      | 0.1  |
| 30   | GlcNAc6S-IdoA-GlcNS-IdoA2S  | 25.6                    | 1.0  | 15.8                    | 2.1  | 18.9                     | 1.5  |

|    |                                 |       |      |       |     |       |     |
|----|---------------------------------|-------|------|-------|-----|-------|-----|
| 31 | GlcNS6S-IdoA-GlcNAc-IdoA2S      | 1.0   | 0.6  | 19.2  | 3.0 | 8.1   | 0.6 |
| 32 | GlcNS6S-IdoA-GlcNS-IdoA2S       | 22.1  | 2.8  | 22.0  | 2.2 | 36.9  | 1.3 |
| 33 | GlcNAc-IdoA2S-GlcNAc6S-IdoA     | 0.2   | 0.2  | 4.5   | 1.2 | 0.5   | 0.3 |
| 34 | GlcNAc-IdoA2S-GlcNS6S-IdoA      | 1.9   | 0.5  | 15.5  | 1.2 | 13.3  | 0.8 |
| 35 | GlcNS-IdoA2S-GlcNAc6S-IdoA      | 38.2  | 5.4  | 44.2  | 3.9 | 32.6  | 1.5 |
| 36 | GlcNS-IdoA2S-GlcNS6S-IdoA       | 36.3  | 1.2  | 31.3  | 3.2 | 49.3  | 1.0 |
| 37 | GlcNAc6S-IdoA-GlcNAc6S-IdoA     | 0.0   | 0.1  | 7.5   | 0.7 | 0.0   | 0.4 |
| 38 | GlcNAc6S-IdoA-GlcNS6S-IdoA      | 1.6   | 3.6  | 9.8   | 0.9 | 2.1   | 0.1 |
| 39 | GlcNS6S-IdoA-GlcNAc6S-IdoA      | 2.4   | 0.1  | 43.0  | 4.3 | 17.3  | 1.6 |
| 40 | GlcNS6S-IdoA-GlcNS6S-IdoA       | 2.7   | 0.1  | 51.6  | 1.9 | 47.6  | 2.9 |
| 41 | GlcNAc6S-IdoA2S-GlcNAc-IdoA     | 0.1   | 0.0  | 14.0  | 1.6 | 0.8   | 0.0 |
| 42 | GlcNAc6S-IdoA2S-GlcNS-IdoA      | 0.6   | 0.2  | 10.1  | 1.3 | 2.9   | 0.5 |
| 43 | GlcNS6S-IdoA2S-GlcNAc-IdoA      | 26.0  | 1.0  | 15.8  | 2.3 | 7.1   | 0.9 |
| 44 | GlcNS6S-IdoA2S-GlcNS-IdoA       | 24.4  | 1.4  | 29.3  | 2.6 | 33.2  | 1.1 |
| 45 | GlcNAc-IdoA2S-GlcNAc6S-IdoA2S   | 0.9   | 0.1  | 21.7  | 2.8 | 2.1   | 0.7 |
| 46 | GlcNAc-IdoA2S-GlcNS6S-IdoA2S    | 36.9  | 1.4  | 32.3  | 4.1 | 47.0  | 1.6 |
| 47 | GlcNS-IdoA2S-GlcNAc6S-IdoA2S    | 57.3  | 1.8  | 94.9  | 4.8 | 100.0 | 8.7 |
| 48 | GlcNS-IdoA2S-GlcNS6S-IdoA2S     | 76.9  | 2.5  | 49.3  | 3.0 | 61.2  | 1.3 |
| 49 | GlcNAc6S-IdoA-GlcNAc6S-IdoA2S   | 0.7   | 1.1  | 21.8  | 2.3 | 3.9   | 0.2 |
| 50 | GlcNAc6S-IdoA-GlcNS6S-IdoA2S    | 35.5  | 0.9  | 44.6  | 2.1 | 46.5  | 1.3 |
| 51 | GlcNS6S-IdoA-GlcNAc6S-IdoA2S    | 3.2   | 0.2  | 66.9  | 3.3 | 46.5  | 4.5 |
| 52 | GlcNS6S-IdoA-GlcNS6S-IdoA2S     | 44.6  | 1.2  | 38.0  | 3.2 | 43.3  | 1.3 |
| 53 | GlcNAc6S-IdoA2S-GlcNAc-IdoA2S   | 0.6   | 0.4  | 26.1  | 1.7 | 3.4   | 0.2 |
| 54 | GlcNAc6S-IdoA2S-GlcNS-IdoA2S    | 38.2  | 1.9  | 59.9  | 3.0 | 27.9  | 1.3 |
| 55 | GlcNS6S-IdoA2S-GlcNAc-IdoA2S    | 35.5  | 1.3  | 43.2  | 2.6 | 34.5  | 1.3 |
| 56 | GlcNS6S-IdoA2S-GlcNS-IdoA2S     | 63.1  | 4.1  | 56.3  | 4.0 | 62.6  | 3.0 |
| 57 | GlcNAc6S-IdoA2S-GlcNAc6S-IdoA   | 2.5   | 0.3  | 39.2  | 2.4 | 8.2   | 3.4 |
| 58 | GlcNAc6S-IdoA2S-GlcNS6S-IdoA    | 4.9   | 2.9  | 9.8   | 2.0 | 13.0  | 1.0 |
| 59 | GlcNS6S-IdoA2S-GlcNAc6S-IdoA    | 67.8  | 10.4 | 82.9  | 5.7 | 52.5  | 1.8 |
| 60 | GlcNS6S-IdoA2S-GlcNS6S-IdoA     | 38.8  | 1.8  | 37.7  | 1.0 | 43.1  | 4.1 |
| 61 | GlcNAc6S-IdoA2S-GlcNAc6S-IdoA2S | 2.2   | 0.2  | 39.9  | 2.6 | 7.9   | 0.8 |
| 62 | GlcNAc6S-IdoA2S-GlcNS6S-IdoA2S  | 28.1  | 3.1  | 26.6  | 2.3 | 27.2  | 0.6 |
| 63 | GlcNS6S-IdoA2S-GlcNAc6S-IdoA2S  | 69.6  | 2.5  | 100.0 | 5.9 | 75.1  | 6.1 |
| 64 | GlcNS6S-IdoA2S-GlcNS6S-IdoA2S   | 100.0 | 4.2  | 80.8  | 2.1 | 67.9  | 2.2 |

### **3. Synthetic procedures and characterization data**

#### **3-1. Materials and methods**

Unless stated otherwise, reactions were performed in oven-dried glassware under an argon atmosphere using freshly dried solvents. Solvents were dried via passage through an activated alumina column under argon. All other commercially obtained reagents were used as received unless otherwise noted. Thin-layer chromatography (TLC) was performed using E. Merck silica gel 60 F254 pre-coated plates (0.25 mm). Visualization of the chromatogram was accomplished by UV, cerium ammonium molybdate, or ninhydrin staining as necessary. ICN silica gel (particle size 0.032–0.063 mm) was used for column chromatography. <sup>1</sup>H NMR (Varian Inova-500 MHz and Bruker-400 MHz), and <sup>13</sup>C NMR (Varian Inova-125 MHz and Bruker-100 MHz) spectra were recorded using CDCl<sub>3</sub>, CD<sub>3</sub>COCD<sub>3</sub>, CD<sub>3</sub>OD, or D<sub>2</sub>O as solvent(s). Data for <sup>1</sup>H are reported as follows: chemical shift (δ ppm), multiplicity (s = singlet, bs = broad singlet, d = doublet, t = triplet, q = quartet, m = multiplet), coupling constant in Hz, and integration. When necessary, proton and carbon assignments were made by means of <sup>1</sup>H-<sup>1</sup>H gCOSY, <sup>1</sup>H-<sup>13</sup>C gHSQCAD and <sup>1</sup>H-<sup>13</sup>C gHMBCAD. Mass spectra were obtained using a Waters LCT Premier XE high-resolution mass spectrometer at the California Institute of Technology. Sodium heparinate was obtained from Smithfield Bioscience. Abbreviations: fluorenylmethyloxycarbonyl (Fmoc); benzenethiol (SPh); levulinoyl (Lev); 2-naphthyl (Naph); (2-naphthyl)methyl (Nap);; trifluoroacetic anhydride (TFAA); trifluoroacetate (TFA); uronic acid (UA).

#### **General synthetic procedures**

**General procedure of fluoros solid phase extraction (FSPE) for non-sulfated compounds.** The crude residue (less than 0.20 g) was dissolved in 0.80 mL of DMF and loaded onto the cartridge filled with fluoros silica gel (10 g). Non-fluorous compounds were eluted with 20 mL of MeOH/H<sub>2</sub>O (3:2, v/v) and 10 mL of MeOH/H<sub>2</sub>O (7:3, v/v). The

fluorous compounds were eluted with 20 mL of acetone, and the fluorous fraction was concentrated to obtain the desired product.

**General procedure of FSPE for O-sulfation step.** The crude reaction mixture (less than 0.20 g) in DMF (0.50 mL) was loaded onto the cartridge filled with fluorous silica gel (10 g). Non-fluorous compounds were eluted with 20 mL of MeOH/H<sub>2</sub>O (1:1, v/v), and fluorous compounds were eluted with 20 mL of acetone. The fluorous fraction was collected and passed through a column of Dowex® 50W X8 Na<sup>+</sup> resin. The resulting solution was concentrated to obtain the desired compound as the sodium salt.

**General procedure of FSPE for hydrolysis, N<sub>3</sub> to NH<sub>2</sub>, N-acetylation, and N-sulfation steps.** The crude reaction mixture (less than 0.20 g) was dissolved in a mixture of MeOH and water (1:1, v/v, 1.0 mL) and loaded onto the cartridge filled with fluorous silica gel (10 g). Non-fluorous compounds were eluted with 20 mL of MeOH/H<sub>2</sub>O (3:7, v/v), and fluorous compounds were eluted with 20 mL of MeOH. The fluorous fraction was collected and passed through a column of Dowex® 50W X8 Na<sup>+</sup> resin. The resulting solution was concentrated to obtain the desired compound as the sodium salt.

**N<sub>3</sub> to NHAc.** To a solution of starting material (0.040 M) in pyridine thioacetic acid (130 eq.) was added at RT. After stirring for 18 h, the mixture was diluted with DCM and washed with saturated aq. NaHCO<sub>3</sub> and then brine. The organic layer was dried over anhydrous Na<sub>2</sub>SO<sub>4</sub>, filtered, and concentrated. The resulting residue was purified by silica gel column chromatography (elution with 3:2 → 1:2 hexane/EtOAc) to obtain the desired compound.

**Cleavage of Fmoc group.** Piperidine (10 equiv per Fmoc group) was added to a solution of starting material (0.050 M) in DCM at RT. Stirring was continued until TLC (hexane/EtOAc, 2:1, v/v) indicated disappearance of starting material (~1 h). The solvent was then removed under reduced pressure. The resulting crude material was purified by

FSPE for non-sulfated compounds. The fluoruous fraction was concentrated to obtain the desired compound.

**Cleavage of Lev group.** A solution of starting material (0.030 M) and hydrazine acetate (10 equiv per Lev group) in  $\text{CH}_2\text{Cl}_2/\text{CH}_3\text{OH}$  (9:1, v/v) was stirred at RT. Stirring was continued until TLC (hexane/EtOAc, 2:1, v/v) indicated disappearance of starting material (~1 h). The solvent was then removed under reduced pressure. The resulting crude material was purified by FSPE for non-sulfated compounds. The fluoruous fraction was concentrated to obtain the desired compound.

**Cleavage of TBDPS group.** To a solution of starting material (0.020 M) in pyridine (1.6 mL) in a plastic conical tube was added hydrogen fluoride pyridine (0.60 mL) at 0 °C. After stirring at RT for 2 h, the reaction was quenched with saturated aq.  $\text{NaHCO}_3$ . The mixture was then extracted with EtOAc, and the organic layer was dried over anhydrous  $\text{Na}_2\text{SO}_4$ , filtered, and concentrated. The resulting crude material was purified by FSPE for non-sulfated compounds. The fluoruous fraction was concentrated to obtain the desired compound.

**Cleavage of Nap group.** DDQ (10 equiv per Nap group) was added to a solution of starting material (8.0 mM) in DCE/MeOH/PBS (16:4:0.25, v/v/v). Stirring was continued until TLC (hexane/EtOAc, 1:1, v/v) indicated disappearance of starting material (~8 h). The reaction mixture was diluted with DCM, and the organic layer was washed with saturated aq.  $\text{NaHCO}_3$ , dried over anhydrous  $\text{Na}_2\text{SO}_4$ , filtered, and concentrated. The resulting crude material was purified by FSPE for non-sulfated compounds. The fluoruous fraction was concentrated to obtain the desired compound.

**O-Sulfation.** A solution of the starting material (0.050 M) and  $\text{SO}_3 \cdot \text{Et}_3\text{N}$  (10 equiv per OH group) in DMF was stirred at 50 °C under argon atmosphere. Stirring was continued until TLC (DCM/MeOH, 7:1, v/v) indicated completion of the reaction (~8–10 h). A mixture of



triethylamine and MeOH (1:1, v/v, 0.20 mL) was added, and stirring was continued for 30 min. The mixture was directly transferred to a fluorosilica column and purified by FSPE.

**Hydrolysis.** The starting material (0.010 M) was dissolved in a mixture of THF and MeOH (1:1, v/v, 2 mL), and 1.0 M aq. LiOH (1.0 mL) was added at RT. The reaction was stirred at RT for 1 h and then at 40 °C until TLC (EtOAc:pyridine:H<sub>2</sub>O:AcOH, 12:5:3:1, v/v) indicated completion of the reaction (~24-36 h). After completion, 1.0 M aq. NH<sub>4</sub>Cl (1.0 mL) was added to quench the reaction, and the reaction mixture was concentrated under reduced pressure to remove THF. The resulting solution was transferred to a fluorosilica column and purified by FSPE. The fluorosilica fraction was collected and passed through a column of Dowex® 50W X8 Na<sup>+</sup> resin. The resulting solution was concentrated to obtain the desired compound as sodium salt.

**N<sub>3</sub> to NH<sub>2</sub>.** To a solution of the starting material (0.020 M) in THF (1.0 mL) was added aqueous NaOH (0.10 M, 0.45 mL) and PMe<sub>3</sub> in THF (1.0 M solution, 10 equiv per N<sub>3</sub> group). The reaction mixture was stirred at RT until completion of the reaction (~1 h), as determined by MALDI-TOF. The reaction mixture was concentrated to remove THF, and the residue was purified by FSPE to obtain the desired compound.

**N-Acetylation.** The starting material (0.020 M) was dissolved in a mixture of anhydrous MeOH (1.0 mL) and Et<sub>3</sub>N (30 equiv per NH<sub>2</sub> group), to which was added acetic anhydride (20 equiv per NH<sub>2</sub> group). The reaction mixture was stirred for 3 h at RT and concentrated under reduced pressure. The residue was purified by FSPE to obtain the desired compound.

**N-Sulfation.** To a solution of the starting material (0.020 M) in MeOH (1.0 mL) and trifluoroethane (0.15 mL) were added trimethylamine (0.15 mL), aqueous NaOH (0.10 M, 0.40 mL) and SO<sub>3</sub>·Py (15 equiv per NH<sub>2</sub> group). After 1 hour, another batch of SO<sub>3</sub>·Py (15 equiv per NH<sub>2</sub> group) was added, and stirring was continued until TLC

(EtOAc:pyridine:H<sub>2</sub>O:AcOH, 8:5:3:1, v/v) indicated completion of the reaction (~12 h). The reaction mixture was then concentrated under reduced pressure, and the residue was purified by FSPE to obtain the desired compound.

**Hydrogenation.** The starting material was dissolved in a mixture of *tert*-butanol and H<sub>2</sub>O (1:1, v/v, 8.0 mL) to which Pd(OH)<sub>2</sub> on carbon (20%, 4 times the weight of starting material) was added. The resulting mixture was placed under an atmosphere of hydrogen and the reaction progress was monitored by Maldi-TOF. After 16 hours, Pd(OH)<sub>2</sub> on carbon (20%, 4 times the weight of starting material) was added. After completion of the reaction, the mixture was filtered, and the residue was washed with a mixture of 1:1 *tert*-butanol/H<sub>2</sub>O (8.0 mL). The combined solvents were concentrated under reduced pressure, concentrated, and the resulting residue was purified by Sephadex G15 (elution with H<sub>2</sub>O) to give target HS tetrasaccharide.

### **Glycan microarray**

**Materials.** Dulbecco's phosphate buffered saline (DPBS), 1X was purchased from Corning, bovine serum albumin (BSA) from Fisher BioReagents. Tris-buffered saline with 0.1% Tween-20 (TBST) was prepared by mixing 10 X TBS (0.10 L, Fisher BioReagents), Tween-20 (1.0 g, Millipore Sigma) and ddH<sub>2</sub>O (0.90 L). Alexa Fluor 647-conjugated streptavidin was purchased from Invitrogen. Recombinant human his-tagged FGF2 protein (>95% purity) was purchased from Sino Biological. 6x-His Tag monoclonal antibody AF647 was purchased from ThermoFisher. Recombinant human FGF4 (>95% purity), biotinylated anti-human FGF4 antibody (>95% purity), recombinant human IL-8 (CXCL8) (77 a.a.) (>95% purity), and biotinylated anti-human IL-8 antibody (CXCL8) (>95% purity) were purchased from Peprotech. Human FGF2, FGF4, and CXCL8 was reconstituted in 0.1% BSA in PBS before use or as recommended by supplier. Schott NEXTERION<sup>®</sup> 3-D Hydrogel coated microarray slides were purchased from Applied Microarrays Inc.

### **Heparan sulfate tetrasaccharide microarray fabrication.**

HS oligosaccharides were dissolved in sodium phosphate buffer (pH 8.5, 50 mM) in 9 concentrations: 200  $\mu\text{M}$ , 100  $\mu\text{M}$ , 50  $\mu\text{M}$ , 25  $\mu\text{M}$ , 12.5  $\mu\text{M}$ , 6.25  $\mu\text{M}$ , 3.13  $\mu\text{M}$ , 1.57  $\mu\text{M}$ , 0.79  $\mu\text{M}$ . The robotic arrayer SX (from Scienion, Berlin, Germany) delivered 414 pL of the solution containing oligosaccharides (9 spots per concentration) to the array slides using dispensing nozzle PDC80, P-2040, under  $\sim 50\%$  relative humidity at 20  $^{\circ}\text{C}$ . The array spots had an average diameter of about 70  $\mu\text{m}$  with a distance of 260  $\mu\text{m}$  between the centers of adjacent spots. The slides were incubated in a chamber with saturated  $(\text{NH}_4)_2\text{SO}_4$  solution (81% relative humidity) for 24 h at 20  $^{\circ}\text{C}$ , and unreacted HS oligosaccharides were removed from the slides by rinsing with deionized water. The remaining *N*-hydroxysuccinimide (NHS) ester groups were blocked by placing slides in a solution containing 50 mM ethanolamine in PBST (137 mM NaCl, 13 mM  $\text{Na}_2\text{HPO}_4$ , 1.6 mM  $\text{NaH}_2\text{PO}_4$ , 2.7 mM KCl, 0.010% Tween-20) at 50  $^{\circ}\text{C}$  for 1.5 h. Slides were rinsed several times with deionized water, dried by centrifugation, and stored before use.

### **HS tetrasaccharide microarray binding assay and array slide processing**

The slide was blocked with 10% BSA in TBST (4.0 mL) with gentle rocking at RT for 1 h, followed by submerging in TBST. This condition was empirically determined to reduce nonspecific binding of proteins to the microarray and to provide optimal signal-to-noise ratios. Next, 5.0  $\mu\text{L}$  of the primary detection protein (2.5  $\mu\text{g}$ , 0.50  $\mu\text{g}/\text{mL}$ ) solution was transferred to 2.5 mL of TBST w/ 1% BSA in a chamber and the slide was incubated with gentle shaking for 1 h at RT. The slide was then washed two times for 5 min each in TBST (4.0 mL) while gently rocking. After the washes, the slide was incubated with the appropriate biotinylated antibody (3.0  $\mu\text{g}$ , 0.50  $\mu\text{g}/\text{mL}$ ) in 1% BSA in TBST solution (3.0 mL) with gentle rocking for 1 h. The slide was then washed two times for 5 min in TBST (5.0 mL) while gently rocking. Next, the slide was incubated with 4.0 mL of Alexa Fluor

647-conjugated streptavidin detection solution (1.0  $\mu\text{g}/\text{mL}$  in TBST w/ 1% BSA) in the dark with gentle rocking for 1 h, washed with TBST (5.0 mL, two times) followed by PBS (45 mL, two times) and ddH<sub>2</sub>O (45 mL, two times), and then dried under a gentle stream of 0.2 micron-filtered air. For his-tagged FGF2, detection was accomplished with an AF647-labeled anti-his antibody. All incubations and washes were carried out at RT unless otherwise noted. The microarray was scanned and analyzed at 647 nm using an Agilent G2565CA Microarray Scanner, and fluorescence quantification was performed using ImageJ software with correction for local background. To ensure accurate signal quantification, the average signal intensity was calculated over a fixed area for all spots. Results were plotted with Prism 9 software at a single concentration as background-corrected fluorescence values normalized to the compound with the highest signal. Bar graphs represent the mean  $\pm$  SD for each compound (50  $\mu\text{M}$ ) in nonuplicate. Each experiment was performed 2-3 times. Heat maps were generated in Excel with columns sorted by sulfation status of the amino positions and rows sorted by sulfation status of the 2-O- and 6-O-hydroxyl groups.

### **Sulfation Logo Calculations**

The sulfation logos were calculated based on methods used to determine DNA consensus sequences for transcription factors that capture enrichment and depletion at each position.<sup>1,2</sup> Each tetrasaccharide was assigned a 6-letter code representing sulfation (S), acetylation (A) or no modification (H) at each position. To generate the logos, the “relative number of binding events” for each compound was calculated by rounding the normalized microarray binding data from the heatmaps down to the nearest integer. This foreground data set was considered to be the number of times a tetrasaccharide sequence appeared in the list of bound sequences and was used to generate a position frequency matrix, where all bound sequences were coded (as described above), and a sum representing the observed frequency of each modification at each position was obtained. From this, a position weight matrix (PWM) was

generated by taking the log of the ratio of the observed frequency to the expected frequency. Because our 64-compound library is comprehensive, the modifications at each position are represented with equal frequency, and the expected frequency for all modifications is 0.5. From the PWMs, sequence logos were visualized as the log likelihood for each modification at each position. The code for generating these logos is publicly available (DOI: 10.5281/zenodo.7787616).

### 3-2. Synthesis and Characterization of Compounds

#### 1. GlcNAc-IdoA-GlcNAc-IdoA

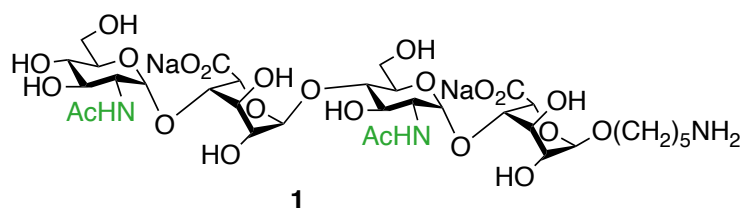

#### **5-Aminopentanyl 2-deoxy-2-acetamido- $\alpha$ -D-glucopyranosyl-(1 $\rightarrow$ 4)- $\alpha$ -L-idopyranosyluronate-(1 $\rightarrow$ 4)-2-deoxy-acetamido- $\alpha$ -D-glucopyranosyl-(1 $\rightarrow$ 4)- $\alpha$ -L-idopyranoside uronate di sodium salt (1).**

Compound **S39** (32 mg, 0.014 mmol) was subjected to hydrolysis, *N*-acetylation and hydrogenation according to the general procedures to give tetrasaccharide **1** (9.0 mg, 72% for three steps).  $^1\text{H}$  NMR (400 MHz,  $\text{D}_2\text{O}$ ):  $\delta$  5.09 (d,  $J$  = 3.6 Hz, 1H, H-1'''), 5.06 (d,  $J$  = 3.7 Hz, 1H, H-1'), 4.81 (d,  $J$  = 3.7 Hz, 1H, H-1''), 4.76 (d,  $J$  = 2.9 Hz, 1H, H-1), 4.64 (d,  $J$  = 3.0 Hz, 1H, H-5''), 4.41 (d,  $J$  = 2.8 Hz, 1H, H-5), 3.98 (t,  $J$  = 3.5 Hz, 1H, H-4''), 3.93 (t,  $J$  = 3.1 Hz, 1H, H-4), 3.87–3.81 (m, 3H, H-2', H-2''', H-3), 3.80–3.68 (m, 7H, H-6', H-6''', H-3'', H-5', H-5'''), 3.68–3.47 (m, 7H, H-3''', H-2'', H-4', H-3', H-2,  $\text{OCH}_2$ ), 3.37 (t,  $J$  = 9.5 Hz, 1H, H-4'''), 2.89 (t,  $J$  = 7.5 Hz, 2H,  $\text{NCH}_2$ ), 1.93 (s, 3H,  $\text{NHC}=\text{OCH}_3$ ), 1.91 (s, 3H,  $\text{NHC}=\text{OCH}_3$ ), 1.62–1.52 (m, 4H, 2 X  $\text{CH}_2$ ), 1.39–1.31 (m, 2H,  $\text{CH}_2$ );  $^{13}\text{C}$  NMR (100 MHz,  $\text{D}_2\text{O}$ ):  $\delta$  175.0 (C-6), 174.9 (C-6''), 174.4 ( $\text{NHC}=\text{O}$ ), 174.3 ( $\text{NHC}=\text{O}$ ), 101.7 (C-1''), 100.7

(C-1), 94.5 (C-1'), 94.3 (C-1'''), 76.7 (C-4'), 74.3 (C-4''), 73.9 (C-4), 71.9 (C-5'''), 71.09 (C-5'), 71.05 (C-3'''), 69.9 (C-5'', C-2''), 69.7 (C-4''', C-3', C-3''), 69.4 (C-2), 68.8 (C-5), 68.6 (C-3), 68.1 (OCH<sub>2</sub>), 60.1 (C-6'''), 59.6 (C-6'), 53.7 (C-2'), 53.5 (C-2'''), 39.3 (NCH<sub>2</sub>), 28.0 (CH<sub>2</sub>), 26.2 (CH<sub>2</sub>), 22.2 (CH<sub>2</sub>), 21.88 (NHC=OCH<sub>3</sub>), 21.86 (NHC=OCH<sub>3</sub>); HRMS (ESI-TOF) calcd for C<sub>33</sub>H<sub>54</sub>N<sub>3</sub>O<sub>23</sub> [M-2Na+H]<sup>-</sup>: 860.3148; found: 860.3154.

## 2. GlcNAc-IdoA-GlcNS-IdoA

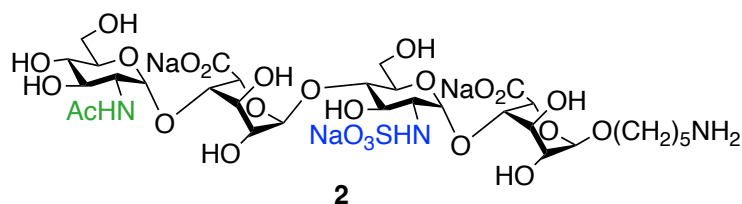

**5-Aminopentanyl 2-deoxy-2-acetamido- $\alpha$ -D-glucopyranosyl-(1 $\rightarrow$ 4)- $\alpha$ -L-idoopyranosyluronate-(1 $\rightarrow$ 4)-2-deoxy-2-sulfamino- $\alpha$ -D-glucopyranosyl-(1 $\rightarrow$ 4)- $\alpha$ -L-idoopyranoside uronate tri sodium salt (2).**

Compound **S39** (23 mg, 0.010 mmol) was subjected to hydrolysis, *N*-sulfation and hydrogenation according to the general procedures to give tetrasaccharide **2** (5.0 mg, 53% for three steps). <sup>1</sup>H NMR (400 MHz, D<sub>2</sub>O):  $\delta$  5.25 (d, *J* = 3.7 Hz, 1H, H-1'), 5.09 (d, *J* = 3.6 Hz, 1H, H-1'''), 4.82 (d, *J* = 3.8 Hz, 1H, H-1''), 4.78 (d, *J* = 2.5 Hz, 1H, H-1), 4.67 (d, *J* = 3.2 Hz, 1H, H-5''), 4.40 (d, *J* = 2.5 Hz, 1H, H-5), 4.03 (t, *J* = 4.0 Hz, 1H, H-3), 3.98 (t, *J* = 3.4 Hz, 1H, H-4''), 3.94 (t, *J* = 2.8 Hz, 1H, H-4), 3.83 (dd, *J* = 10.5, 3.6 Hz, 1H, H-2'''), 3.80–3.70 (m, 7H, H-6', H-6''', H-3', H-5', H-5'''), 3.68–3.51 (m, 7H, H-3''', H-2'', H-4', H-3', H-2, OCH<sub>2</sub>), 3.37 (t, *J* = 9.5 Hz, 1H, H-4'''), 3.14 (dd, *J* = 10.2, 3.6 Hz, 1H, H-2'), 2.90 (t, *J* = 7.5 Hz, 2H, NCH<sub>2</sub>), 1.93 (s, 3H, NHC=OCH<sub>3</sub>), 1.62–1.52 (m, 4H, 2 X CH<sub>2</sub>), 1.39–1.31 (m, 2H, CH<sub>2</sub>); <sup>13</sup>C NMR (100 MHz, D<sub>2</sub>O):  $\delta$  175.3 (C-6), 175.0 (C-6''), 174.4 (NHC=O), 101.5 (C-1''), 100.7 (C-1), 95.7 (C-1'), 94.4 (C-1'''), 76.7 (C-4'), 74.8 (C-4), 74.3 (C-4''), 71.9 (C-5'''), 71.0 (C-3'''), 70.9 (C-5'), 69.9 (C-5'', C-2''), 69.7 (C-4''', C-3'), 69.6 (C-3''), 68.9 (C-2), 68.3 (C-5), 68.1 (C-3), 68.0 (OCH<sub>2</sub>), 60.1 (C-6' or C-6'''), 59.7 (C-6' or C-6''), 57.9 (C-2'), 53.5 (C-2'''), 39.3 (NCH<sub>2</sub>), 27.9 (CH<sub>2</sub>), 26.2 (CH<sub>2</sub>), 22.2 (CH<sub>2</sub>), 21.9

(NHC=OCH<sub>3</sub>); HRMS (ESI-TOF) calcd for C<sub>31</sub>H<sub>52</sub>N<sub>3</sub>O<sub>25</sub>S [M-3Na+2H]<sup>-</sup>: 898.2611; found: 898.2594.

### 3. GlcNS-IdoA-GlcNAc-IdoA

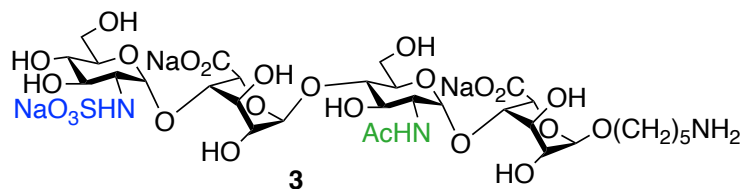

### **5-Aminopentanyl 2-deoxy-2-sulfamino- $\alpha$ -D-glucopyranosyl-(1 $\rightarrow$ 4)- $\alpha$ -L-idoopyranosyluronate-(1 $\rightarrow$ 4)-2-acetamido-2-deoxy- $\alpha$ -D-glucopyranosyl-(1 $\rightarrow$ 4)- $\alpha$ -L-idoopyranoside uronate tri sodium salt (3).**

Compound **S17** (22 mg, 0.0090 mmol) was subjected to hydrolysis, *N*-acetylation, N<sub>3</sub> to NH<sub>2</sub>, *N*-sulfation and hydrogenation according to the general procedures to give tetrasaccharide **3** (5.0 mg, 53% for five steps). <sup>1</sup>H NMR (400 MHz, D<sub>2</sub>O):  $\delta$  5.29 (d, *J* = 3.5 Hz, 1H, H-1'''), 5.06 (d, *J* = 3.7 Hz, 1H, H-1'), 4.84 (d, *J* = 3.2 Hz, 1H, H-1''), 4.76 (d, *J* = 3.0 Hz, 1H, H-1), 4.65 (d, *J* = 2.2 Hz, 1H, H-5''), 4.41 (d, *J* = 2.8 Hz, 1H, H-5), 4.00–3.97 (m, 2H, H-3'', H-4''), 3.93 (t, *J* = 3.1 Hz, 1H, H-4), 3.87–3.81 (m, 2H, H-2', H-3), 3.80–3.61 (m, 10H, H-5', H-6', H-6''', H-5''', H-2'', H-4', H-3', OCH<sub>2</sub>), 3.57–3.50 (m, 3H, H-3''', H-2, OCH<sub>2</sub>), 3.36 (t, *J* = 9.3 Hz, 1H, H-4'''), 3.11 (dd, *J* = 10.3, 3.5 Hz, 1H, H-2'''), 2.90 (t, *J* = 7.5 Hz, 2H, NCH<sub>2</sub>), 1.92 (s, 3H, NHC=OCH<sub>3</sub>), 1.62–1.52 (m, 4H, 2 X CH<sub>2</sub>), 1.39–1.31 (m, 2H, CH<sub>2</sub>); <sup>13</sup>C NMR (100 MHz, D<sub>2</sub>O):  $\delta$  175.2 (C-6''), 175.0 (C-6), 174.3 (NHC=O), 101.7 (C-1''), 100.8 (C-1), 95.3 (C-1'''), 94.5 (C-1'), 76.9 (C-4'), 74.8 (C-4''), 73.9 (C-4), 71.6 (C-5'''), 71.2 (C-3'''), 71.1 (C-5'), 69.73 (C-4'''), 69.68 (C-3'), 69.4 (C-2), 69.3 (C-5'', C-2''), 68.8 (C-5, C-3''), 68.6 (C-3), 68.1 (OCH<sub>2</sub>), 60.2 (C-6'''), 59.6 (C-6'), 57.8 (C-2'''), 53.7 (C-2'), 39.3 (NCH<sub>2</sub>), 28.0 (CH<sub>2</sub>), 26.2 (CH<sub>2</sub>), 22.2 (CH<sub>2</sub>), 21.9 (NHC=OCH<sub>3</sub>); HRMS (ESI-TOF) calcd for C<sub>31</sub>H<sub>52</sub>N<sub>3</sub>O<sub>25</sub>S [M-3Na+2H]<sup>-</sup>: 898.2611; found: 898.2639.

### 4. GlcNS-IdoA-GlcNS-IdoA

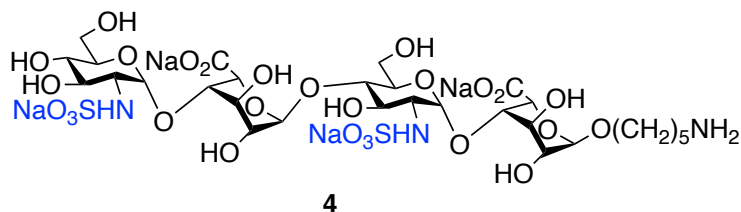

**5-Aminopentanyl 2-deoxy-2-sulfamino- $\alpha$ -D-glucopyranosyl-(1 $\rightarrow$ 4)- $\alpha$ -L-idopyranosyluronate-(1 $\rightarrow$ 4)-2-sulfamino-2-deoxy- $\alpha$ -D-glucopyranosyl-(1 $\rightarrow$ 4)- $\alpha$ -L-idopyranoside uronate tri sodium salt (4).**

Compound **S17** (44 mg, 0.019 mmol) was subjected to hydrolysis, N<sub>3</sub> to NH<sub>2</sub>, N-sulfation and hydrogenation according to the general procedures to give tetrasaccharide **4** (15 mg, 77% for four steps). <sup>1</sup>H NMR (400 MHz, D<sub>2</sub>O):  $\delta$  5.29 (d, *J* = 3.5 Hz, 1H, H-1'''), 5.25 (d, *J* = 3.5 Hz, 1H, H-1'), 4.85 (d, *J* = 2.7 Hz, 1H, H-1''), 4.79 (d, *J* = 2.1 Hz, 1H, H-1), 4.69 (1H, H-5''), 4.40 (d, *J* = 2.3 Hz, 1H, H-5), 4.04–3.97 (m, 3H, H-3, H-3'', H-4''), 3.94 (t, *J* = 2.8 Hz, 1H, H-4), 3.76–3.70 (m, 6H, H-6', H-6''', H-5', H-5'''), 3.68–3.60 (m, 4H, H-2'', H-4', H-3', OCH<sub>2</sub>), 3.57–3.50 (m, 3H, H-2, H-3''', OCH<sub>2</sub>), 3.37 (t, *J* = 9.5 Hz, 1H, H-4'''), 3.14 (dd, *J* = 10.0, 3.6 Hz, 1H, H-2'), 3.11 (dd, *J* = 10.3, 3.5 Hz, 1H, H-2'''), 2.90 (t, *J* = 7.5 Hz, 2H, NCH<sub>2</sub>), 1.62–1.52 (m, 4H, 2 X CH<sub>2</sub>), 1.39–1.31 (m, 2H, CH<sub>2</sub>); <sup>13</sup>C NMR (100 MHz, D<sub>2</sub>O):  $\delta$  175.28 (C-6), 175.24 (C-6''), 101.5 (C-1''), 100.7 (C-1), 95.6 (C-1'), 95.4 (C-1'''), 77.0 (C-4'), 74.8 (C-4 and C-4''), 71.7 (C-5'''), 71.2 (C-3'''), 70.9 (C-5'), 69.7 (C-4''', C-3'), 69.3 (C-5'', C-2''), 68.9 (C-2), 69.7 (C-3''), 68.3 (C-5), 68.1 (C-3 and OCH<sub>2</sub>), 60.2 (C-6'''), 59.7 (C-6'), 57.9 (C-2'), 57.8 (C-2'''), 39.3 (NCH<sub>2</sub>), 27.9 (CH<sub>2</sub>), 26.2 (CH<sub>2</sub>), 22.2 (CH<sub>2</sub>); HRMS (ESI-TOF) calcd for C<sub>29</sub>H<sub>50</sub>N<sub>3</sub>O<sub>27</sub>S<sub>2</sub> [M–4Na+3H]<sup>–</sup>: 936.2073; found: 936.2062.

**5. GlcNAc-IdoA-GlcNAc-IdoA2S**

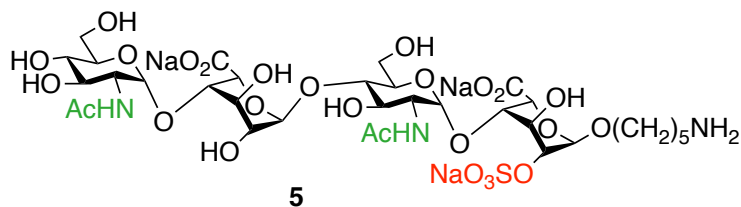



**5-Aminopentanyl 2-deoxy-2-acetamido- $\alpha$ -D-glucopyranosyl-(1 $\rightarrow$ 4)- $\alpha$ -L-idopyranosyluronate-(1 $\rightarrow$ 4)-2-deoxy-2-acetamido- $\alpha$ -D-glucopyranosyl-(1 $\rightarrow$ 4)-2-O-sulfonato- $\alpha$ -L-idopyranoside uronate tri sodium salt (5).**

Compound **S23** (29 mg, 0.011 mmol) was subjected to hydrolysis, *N*-acetylation and hydrogenation according to the general procedures to give tetrasaccharide **5** (8.0 mg, 69% for three steps).  $^1\text{H}$  NMR (400 MHz,  $\text{D}_2\text{O}$ ):  $\delta$  5.09 (d,  $J = 3.6$  Hz, 1H, H-1'''), 5.02 (d,  $J = 3.7$  Hz, 1H, H-1'), 5.01 (s, 1H, H-1), 4.81 (d,  $J = 3.7$  Hz, 1H, H-1''), 4.64 (d,  $J = 3.0$  Hz, 1H, H-5''), 4.45 (d,  $J = 2.0$  Hz, 1H, H-5), 4.15 (t,  $J = 3.5$  Hz, 1H, H-3), 4.13–4.12 (m, 1H, H-2), 3.98 (t,  $J = 3.4$  Hz, 1H, H-4''), 3.93–3.89 (m, 2H, H-4, H-2'), 3.83 (dd,  $J = 10.5, 3.5$  Hz, 1H, H-2'''), 3.81–3.70 (m, 7H, H-6', H-6''', H-3'', H-5', H-5'''), 3.68–3.52 (m, 6H, H-3'', H-2'', H-4', H-3', OCH<sub>2</sub>), 3.37 (t,  $J = 9.5$  Hz, 1H, H-4'''), 2.91 (t,  $J = 7.5$  Hz, 2H, NCH<sub>2</sub>), 1.96 (s, 3H, NHC=OCH<sub>3</sub>), 1.93 (s, 3H, NHC=OCH<sub>3</sub>), 1.62–1.52 (m, 4H, 2 X CH<sub>2</sub>), 1.39–1.31 (m, 2H, CH<sub>2</sub>);  $^{13}\text{C}$  NMR (100 MHz,  $\text{D}_2\text{O}$ ):  $\delta$  175.2 (C-6), 174.9 (C-6'''), 174.7 (NHC=O), 174.4 (NHC=O), 101.6 (C-1'''), 98.5 (C-1), 94.4 (C-1'''), 93.7 (C-1'), 76.7 (C-4'), 74.4 (C-4''), 73.9 (C-2), 71.9 (C-5'''), 71.09 (C-5', C-3'''), 70.9 (C-4), 69.9 (C-5''), 69.8 (C-3', C-2''), 69.7 (C-4''', C-3''), 68.1 (OCH<sub>2</sub>), 67.0 (C-5), 64.0 (C-3), 60.1 (C-6'''), 59.7 (C-6'), 53.5 (C-2', C-2'''), 39.4 (NCH<sub>2</sub>), 27.7 (CH<sub>2</sub>), 26.2 (CH<sub>2</sub>), 22.23 (CH<sub>2</sub>), 22.16 (NHC=OCH<sub>3</sub>), 21.86 (NHC=OCH<sub>3</sub>); HRMS (ESI-TOF) calcd for C<sub>33</sub>H<sub>54</sub>N<sub>3</sub>O<sub>26</sub>S [M–3Na+2H]<sup>-</sup>: 940.2716; found: 940.2723.

**6. GlcNAc-IdoA-GlcNS-IdoA2S**

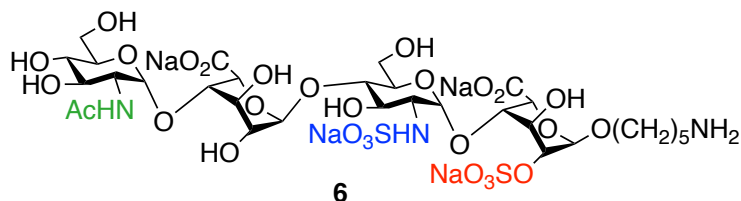

**5-Aminopentanyl 2-deoxy-2-acetamido- $\alpha$ -D-glucopyranosyl-(1 $\rightarrow$ 4)- $\alpha$ -L-idopyranosyluronate-(1 $\rightarrow$ 4)-2-deoxy-2-sulfamido- $\alpha$ -D-glucopyranosyl-(1 $\rightarrow$ 4)-2-O-sulfonato- $\alpha$ -L-idopyranoside uronate tetra sodium salt (6).**

Compound **S23** (22 mg, 0.0090 mmol) was subjected to hydrolysis, *N*-sulfation and hydrogenation according to the general procedures to give tetrasaccharide **6** (5.0 mg, 55% for three steps). <sup>1</sup>H NMR (400 MHz, D<sub>2</sub>O): δ 5.28 (d, *J* = 3.5 Hz, 1H, H-1'), 5.09 (d, *J* = 3.6 Hz, 1H, H-1'''), 5.03 (s, 1H, H-1), 4.82 (d, *J* = 3.8 Hz, 1H, H-1''), 4.67 (d, *J* = 3.2 Hz, 1H, H-5''), 4.39 (d, *J* = 2.5 Hz, 1H, H-5), 4.14–4.13 (m, 2H, H-2, H-3), 3.98 (t, *J* = 3.4 Hz, 1H, H-4''), 3.96–3.95 (m, 1H, H-4), 3.83 (dd, *J* = 10.5, 3.6 Hz, 1H, H-2'''), 3.82–3.75 (m, 3H, H-6', H-3'', H-5'), 3.74–3.69 (m, 4H, H-6''', H-6', H-5'''), 3.69–3.53 (m, 6H, H-3''', H-2'', H-4', H-3', OCH<sub>2</sub>), 3.37 (t, *J* = 9.5 Hz, 1H, H-4'''), 3.16 (dd, *J* = 10.0, 3.5 Hz, 1H, H-2'), 2.91 (t, *J* = 7.5 Hz, 2H, NCH<sub>2</sub>), 1.93 (s, 3H, NHC=OCH<sub>3</sub>), 1.62–1.52 (m, 4H, 2 X CH<sub>2</sub>), 1.39–1.31 (m, 2H, CH<sub>2</sub>); <sup>13</sup>C NMR (100 MHz, D<sub>2</sub>O): δ 175.0 (C-6'''), 174.9 (C-6), 174.4 (NHC=O), 101.4 (C-1''), 98.7 (C-1), 96.9 (C-1'), 94.4 (C-1'''), 76.8 (C-4'), 75.94 (C-4), 75.90 (C-2), 74.3 (C-4''), 71.9 (C-5'''), 71.1 (C-3'''), 70.9 (C-5'), 69.94 (C-5''), 69.90 (C-2''), 69.7 (C-4'''), 69.6 (C-3''), 69.5 (C-3'), 68.6 (C-3), 68.4 (C-5), 68.0 (OCH<sub>2</sub>), 60.1 (C-6'''), 59.8 (C-6'), 58.2 (C-2'), 53.5 (C-2'''), 39.4 (NCH<sub>2</sub>), 27.8 (CH<sub>2</sub>), 26.2 (CH<sub>2</sub>), 22.2 (CH<sub>2</sub>), 21.9 (NHC=OCH<sub>3</sub>); HRMS (ESI-TOF) calcd for C<sub>31</sub>H<sub>52</sub>N<sub>3</sub>O<sub>28</sub>S<sub>2</sub> [M–4Na+3H]<sup>–</sup>: 978.2179; found: 978.2195.

## 7. GlcNS-IdoA-GlcNAc-IdoA2S

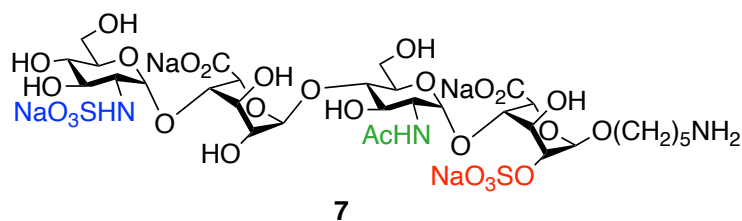

**5-Aminopentanyl 2-deoxy-2-sulfamino- $\alpha$ -D-glucopyranosyl-(1 $\rightarrow$ 4)- $\alpha$ -L-idopyranosyluronate-(1 $\rightarrow$ 4)-2-deoxy-2-acetamido- $\alpha$ -D-glucopyranosyl-(1 $\rightarrow$ 4)-2-O-sulfonato- $\alpha$ -L-idopyranoside uronate tetra sodium salt (7).**

Compound **89** (25.5 mg, 0.015 mmol) was subjected to *N*-acetylation, N<sub>3</sub> to NH<sub>2</sub> conversion, *N*-sulfation and hydrogenation according to the general procedures to obtain

**7** (11 mg, 79% for four steps).  $^1\text{H}$  NMR (400 MHz,  $\text{D}_2\text{O}$ ):  $\delta$  5.29 (d,  $J = 3.7$  Hz, 1H, H-1'''), 5.02–4.99 (m, 2H, H-1, H-1'), 4.84 (d,  $J = 3.7$  Hz, 1H, H-1''), 4.70–4.68 (m, 1H, H-5''), 4.46 (d,  $J = 2.1$  Hz, 1H, H-5), 4.18–4.09 (m, 2H, H-2, H-3), 4.03–3.96 (m, 2H, H-3'', H-4''), 3.94–3.89 (m, 2H, H-4, H-2'), 3.82–3.61 (m, 10H, H-3', H-4', H-5', H-6'a, H-6'b, H-2'', H-5''', H-6'''a, H-6'''b,  $\text{OCH}_2$ ), 3.59–3.48 (m, 1H, H-3''',  $\text{OCH}_2$ ), 3.37 (appt,  $J = 9.4$  Hz, 1H, H-4'''), 3.10 (dd,  $J = 10.3, 3.6$  Hz, 1H, H-2'''), 2.91 (t,  $J = 7.4$  Hz, 2H,  $\text{NCH}_2$ ), 1.96 (s, 3H,  $\text{C}=\text{OCH}_3$ ), 1.62–1.52 (m, 4H, 2 X  $\text{CH}_2$ ), 1.42–1.34 (m, 2H,  $\text{CH}_2$ );  $^{13}\text{C}$  NMR (100 MHz,  $\text{D}_2\text{O}$ ):  $\delta$  175.2 (C-6), 175.1 (C-6''), 174.7 (CONH), 101.7 (C-1''), 98.5 (C-1), 95.4 (C-1'''), 93.6 (C-1'), 76.9 (C-3'), 74.8 (C-4''), 73.9 (C-2), 71.7 (C-5'''), 71.2 (C-3'''), 71.1 (C-4'), 70.9 (C-4), 69.9 (C-4'''), 69.7 (C-5'), 69.32 (C-2''), 69.28 (C-5''), 68.8 (C-3''), 68.1 ( $\text{OCH}_2$ ), 67.0 (C-5), 64.0 (C-3), 60.2 (C-6'''), 59.7 (C-6'), 57.8 (C-2'''), 53.5 (C-2'), 39.4 ( $\text{NCH}_2$ ), 27.8 ( $\text{CH}_2$ ), 26.2 ( $\text{CH}_2$ ), 22.24 ( $\text{CH}_2$ ), 22.17 ( $\text{NHC}=\text{OCH}_3$ ); HRMS (ESI-TOF) calcd for  $\text{C}_{31}\text{H}_{52}\text{N}_3\text{O}_{28}\text{S}_2$  [ $\text{M}-4\text{Na}+3\text{H}$ ] $^-$ : 978.2179; found: 978.2175.

#### 8. GlcNS-IdoA-GlcNS-IdoA2S

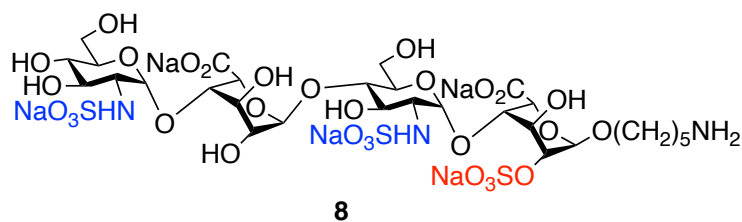

**5-Aminopentanyl 2-deoxy-2-sulfamino- $\alpha$ -D-glucopyranosyl-(1 $\rightarrow$ 4)- $\alpha$ -L-idopyranosyluronate-(1 $\rightarrow$ 4)-2-deoxy-2-sulfamino- $\alpha$ -D-glucopyranosyl-(1 $\rightarrow$ 4)-2-O-sulfonato- $\alpha$ -L-idopyranoside uronate penta sodium salt (8).**

Compound **89** (38 mg, 0.015 mmol) was subjected to  $\text{N}_3$  to  $\text{NH}_2$  conversion,  $\text{N}$ -sulfation and hydrogenation according to the general procedures to obtain **8** (8.2 mg, 49% for three steps).  $^1\text{H}$  NMR (400 MHz,  $\text{D}_2\text{O}$ ):  $\delta$  5.30–5.24 (m, 2H, H-1', H-1'''), 5.06–4.99 (m, 1H, H-1), 4.86 (d,  $J = 3.1$  Hz, 1H, H-1''), 4.77 (d,  $J = 2.7$  Hz, 1H, H-5''), 4.43 (d,  $J = 2.4$  Hz, 1H, H-5), 4.15–4.12 (m, 2H, H-2, H-3), 4.02–3.94 (m, 3H, H-4, H-3'', H-4''), 3.82–3.47 (m, 12H, H-3', H-4', H-5', H-6'a, H-6'b, H-2'', H-3''', H-5''', H-6'''a, H-6'''b,  $\text{OCH}_2$ ), 3.37 (appt,  $J$

= 9.6 Hz, 1H, H-4'''), 3.15 (dd,  $J = 10.1, 3.0$  Hz, 1H, H-2'), 3.15 (dd,  $J = 10.2, 3.5$  Hz, 1H, H-2'''), 2.90 (t,  $J = 7.3$  Hz, 2H, NCH<sub>2</sub>), 1.63–1.51 (m, 4H, 2 X CH<sub>2</sub>), 1.41–1.34 (m, 2H, CH<sub>2</sub>); <sup>13</sup>C NMR (100 MHz, D<sub>2</sub>O):  $\delta$  174.9 (C-6''), 174.7 (C-6), 101.4 (C-1''), 98.8 (C-1), 97.0 (C-1'''), 95.6 (C-1'), 77.1 (C-3'), 75.9 (C-2, C-4), 74.7 (C-4''), 71.8 (C-5'''), 71.2 (C-3'''), 71.0 (C-4'), 69.7 (C-4'''), 69.5 (C-2''), 69.1 (C-5'), 68.9 (C-5''), 68.52 (C-3''), 68.46 (C-3), 68.3 (C-5), 68.1 (OCH<sub>2</sub>), 60.1 (C-6' or C-6'''), 59.8 (C-6' or C-6''), 58.2 (C-2'), 57.8 (C-2'''), 39.4 (NCH<sub>2</sub>), 27.8 (CH<sub>2</sub>), 26.2 (CH<sub>2</sub>), 22.2 (CH<sub>2</sub>); HRMS (ESI-TOF) calcd for C<sub>36</sub>H<sub>54</sub>N<sub>3</sub>O<sub>30</sub>S<sub>3</sub>Na<sub>2</sub> [M–5Na+4H]<sup>-</sup>: 1016.1641; found: 1016.1669.

### 9. GlcNAc-IdoA-GlcNAc6S-IdoA

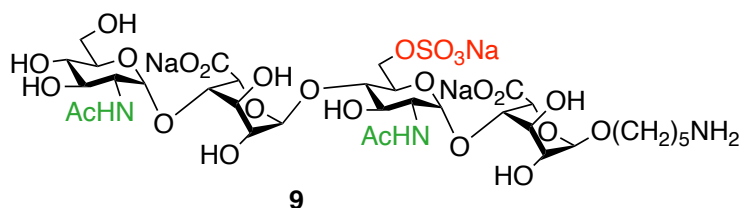

**5-Aminopentanyl 2-deoxy-2-acetamido- $\alpha$ -D-glucopyranosyl-(1 $\rightarrow$ 4)- $\alpha$ -L-idopyranosyluronate-(1 $\rightarrow$ 4)-2-deoxy-acetamido-6-O-sulfonato- $\alpha$ -D-glucopyranosyl-(1 $\rightarrow$ 4)- $\alpha$ -L-idopyranoside uronate tri sodium salt (9).**

Compound **S41** (24 mg, 0.0090 mmol) was subjected to hydrolysis, *N*-acetylation and hydrogenation according to the general procedures to give tetrasaccharide **9** (5.0 mg, 53% for three steps). <sup>1</sup>H NMR (400 MHz, D<sub>2</sub>O):  $\delta$  5.07 (d,  $J = 3.5$  Hz, 1H, H-1'''), 5.07 (d,  $J = 3.5$  Hz, 1H, H-1'), 4.88 (d,  $J = 3.3$  Hz, 1H, H-1''), 4.76 (d,  $J = 2.9$  Hz, 1H, H-1), 4.66 (d,  $J = 2.7$  Hz, 1H, H-5''), 4.42 (d,  $J = 2.7$  Hz, 1H, H-5), 4.25 (dd,  $J = 11.3, 2.3$  Hz, 1H, H-6'), 4.13 (dd,  $J = 11.3, 1.5$  Hz, 1H, H-6''), 3.98 (t,  $J = 3.0$  Hz, 1H, H-4''), 3.98–3.95 (m, 1H, H-5'), 3.95 (t,  $J = 3.0$  Hz, 1H, H-4), 3.89 (dd,  $J = 9.8, 3.8$  Hz, 1H, H-2'), 3.84–3.79 (m, 3H, H-3'', H-2''', H-3), 3.75–3.70 (m, 3H, H-6', H-6''', H-5'''), 3.69–3.58 (m, 4H, H-3''', H-2'', H-4', H-3', OCH<sub>2</sub>), 3.56–3.79 (m, 2H, H-2, OCH<sub>2</sub>), 3.37 (t,  $J = 9.7$  Hz, 1H, H-4'''), 2.89 (t,  $J = 7.5$  Hz, 2H, NCH<sub>2</sub>), 1.93 (s, 3H, NHC=OCH<sub>3</sub>), 1.91 (s, 3H, NHC=OCH<sub>3</sub>), 1.62–1.52 (m,

4H, 2 X CH<sub>2</sub>), 1.39–1.31 (m, 2H, CH<sub>2</sub>); <sup>13</sup>C NMR (100 MHz, D<sub>2</sub>O): δ 175.01 (C-6''), 174.98 (C-6), 174.5 (NHC=O), 174.3 (NHC=O), 101.9 (C-1'''), 100.8 (C-1), 94.5 (C-1' or C-1'''), 94.3 (C-1' or C-1'''), 76.8 (C-4'), 73.95 (C-4''), 73.93 (C-4), 71.9 (C-5'''), 71.1 (C-3'''), 69.8 (C-3'), 69.6 (C-4'''), 69.5 (C-2''), 69.4 (C-5''), 69.3 (C-2), 69.2 (C-5'), 69.0 (C-3''), 68.7 (C-5), 68.5 (C-3), 68.1 (OCH<sub>2</sub>), 66.1 (C-6'), 60.1 (C-6'''), 53.5 (C-2' and C-2'''), 39.4 (NCH<sub>2</sub>), 28.0 (CH<sub>2</sub>), 26.3 (CH<sub>2</sub>), 22.3 (CH<sub>2</sub>), 21.89 (NHC=OCH<sub>3</sub> and NHC=OCH<sub>3</sub>); HRMS (ESI-TOF) calcd for C<sub>33</sub>H<sub>54</sub>N<sub>3</sub>O<sub>26</sub>S [M-3Na+2H]<sup>-</sup>: 940.2716; found: 940.2711.

10. GlcNAc-IdoA-GlcNS<sub>6</sub>S-IdoA

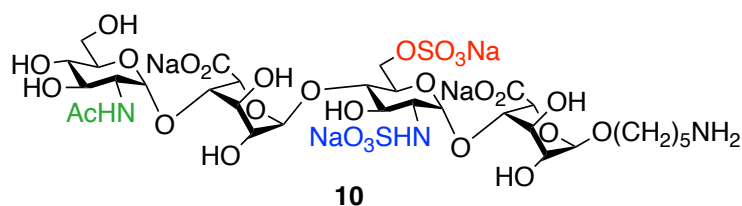

**5-Aminopentanyl 2-deoxy-2-acetamido- $\alpha$ -D-glucopyranosyl-(1 $\rightarrow$ 4)- $\alpha$ -L-idopyranosyluronate-(1 $\rightarrow$ 4)-2-deoxy-2-sulfamino-6-O-sulfonato- $\alpha$ -D-glucopyranosyl-(1 $\rightarrow$ 4)- $\alpha$ -L-idopyranoside uronate tetra sodium salt (10).**

Compound **S41** (31 mg, 0.012 mmol) was subjected to hydrolysis, *N*-sulfation and hydrogenation according to the general procedures to give tetrasaccharide **10** (9.0 mg, 69% for three steps). <sup>1</sup>H NMR (400 MHz, D<sub>2</sub>O): δ 5.26 (d, *J* = 3.6 Hz, 1H, H-1'), 5.07 (d, *J* = 3.6 Hz, 1H, H-1'''), 4.89 (d, *J* = 3.1 Hz, 1H, H-1''), 4.78 (d, *J* = 2.3 Hz, 1H, H-1), 4.70 (1H, H-5''), 4.40 (d, *J* = 2.4 Hz, 1H, H-5), 4.25 (dd, *J* = 11.2, 2.0 Hz, 1H, H-6'), 4.11 (dd, *J* = 11.2, 1.5 Hz, 1H, H-6'), 4.02 (t, *J* = 3.7 Hz, 1H, H-3), 3.98 (t, *J* = 3.0 Hz, 1H, H-4''), 3.95 (t, *J* = 2.6 Hz, 1H, H-4), 3.94–3.91 (m, 1H, H-5'), 3.85–3.80 (m, 2H, H-2''', H-3''), 3.75–3.69 (m, 3H, H-6''', H-5'''), 3.67–3.60 (m, 4H, H-3''', H-2'', H-4', OCH<sub>2</sub>), 3.59–3.53 (m, 3H, H-3', H-2, OCH<sub>2</sub>), 3.37 (t, *J* = 9.6 Hz, 1H, H-4'''), 3.14 (dd, *J* = 10.3, 3.5 Hz, 1H, H-2'), 2.90 (t, *J* = 7.5 Hz, 2H, NCH<sub>2</sub>), 1.93 (s, 3H, NHC=OCH<sub>3</sub>), 1.62–1.52 (m, 4H, 2 X CH<sub>2</sub>), 1.39–1.31 (m, 2H, CH<sub>2</sub>); <sup>13</sup>C NMR (100 MHz, D<sub>2</sub>O): δ 175.2 (C-6), 175.1 (C-6''), 174.4 (NHC=O), 101.8 (C-1'''), 100.7 (C-1), 95.6 (C-1'), 94.3 (C-1'''), 76.8 (C-4'), 74.8 (C-4), 73.9

(C-4''), 71.9 (C-5'''), 71.1 (C-3'''), 69.8 (C-4'''), 69.6 (C-3'), 69.42 (C-2''), 69.36 (C-5''), 78.96 (C-5'), 68.85 (C-3''), 68.82 (C-2), 68.3 (C-5), 68.04 (OCH<sub>2</sub>), 68.01 (C-3), 66.2 (C-6'), 60.1 (C-6'''), 57.8 (C-2'), 53.5 (C-2'''), 39.4 (NCH<sub>2</sub>), 27.9 (CH<sub>2</sub>), 26.2 (CH<sub>2</sub>), 22.2 (CH<sub>2</sub>), 21.9 (NHC=OCH<sub>3</sub>); HRMS (ESI-TOF) calcd for C<sub>31</sub>H<sub>52</sub>N<sub>3</sub>O<sub>28</sub>S<sub>2</sub> [M-4Na+3H]<sup>-</sup>: 978.2179; found: 978.2181.

### 11. GlcNS-IdoA-GlcNAc6S-IdoA

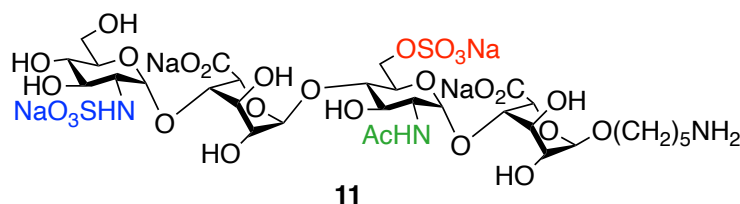

**5-Aminopentanyl 2-deoxy-2-sulfamino- $\alpha$ -D-glucopyranosyl-(1 $\rightarrow$ 4)- $\alpha$ -L-idopyranosyluronate-(1 $\rightarrow$ 4)-2-deoxy-2-acetamido-6-O-sulfonato- $\alpha$ -D-glucopyranosyl-(1 $\rightarrow$ 4)- $\alpha$ -L-idopyranoside uronate tetra sodium salt (11).**

Compound **S10** (46 mg, 0.019 mmol) was subjected to hydrolysis, *N*-acetylation, N<sub>3</sub> to NH<sub>2</sub> conversion, *N*-sulfation and hydrogenation according to the general procedures to obtain **11** (6.3 mg, 32% for five steps). <sup>1</sup>H NMR (400 MHz, D<sub>2</sub>O):  $\delta$  5.25 (d, *J* = 3.8 Hz, 1H, H-1'''), 5.07 (d, *J* = 3.9 Hz, 1H, H-1'), 4.90 (d, *J* = 2.5 Hz, 1H, H-1''), 4.76 (d, *J* = 3.3 Hz, 1H, H-1), 4.68 (m, 1H, H-5''), 4.42 (d, *J* = 2.9 Hz, 1H, H-5), 4.24 (dd, *J* = 2.6, 11.3 Hz, 1H, H-6'a), 4.13 (dd, *J* = 2.0, 11.3 Hz, 1H, H-6'b), 4.02 (appt, *J* = 4.0 Hz, 1H, H-3''), 3.98–3.93 (m, 3H, H-4, J-5', H-4''), 3.88 (dd, *J* = 3.9, 10.0 Hz, 1H, H-2'), 4.02 (dd, *J* = 3.7, 5.3 Hz, 1H, H-3), 3.74–3.62 (m, 7H, H-3', H-4', H-2'', H-5''', H-6'''a, H-6'''b, OCH<sub>2</sub>), 3.57–3.48 (m, 3H, H-2, H-3''', OCH<sub>2</sub>), 3.37 (appt, *J* = 9.1 Hz, 1H, H-4'''), 3.09 (dd, *J* = 10.0, 3.8 Hz, 1H, H-2'''), 2.90 (t, *J* = 7.6 Hz, 2H, NCH<sub>2</sub>), 1.92 (s, 3H, C=OCH<sub>3</sub>), 1.66–1.49 (m, 4H, 2 X CH<sub>2</sub>), 1.41–1.31 (m, 2H, CH<sub>2</sub>); <sup>13</sup>C NMR (100 MHz, D<sub>2</sub>O):  $\delta$  175.4 (C-6''), 175.0 (C-6), 174.3 (CONH), 102.1 (C-1''), 100.8 (C-1), 95.5 (C-1'''), 94.5 (C-1'), 77.4 (C-4'), 74.4 (C-4 or C-4''), 74.0 (C-4 or C-4''), 71.6 (C-5'''), 71.3 (C-3'''), 69.9 (C-3'), 69.7 (C-4'''), 69.4 (C-2), 69.2 (C-5'), 68.8 (C-2''), 68.7 (C-5), 68.64 (C-5''), 68.58 (C-3), 68.1 (OCH<sub>2</sub>), 67.9 (C-

3"), 66.2 (C-6'), 60.2 (C-6'''), 57.9 (C-2'''), 53.6 (C-2'), 39.4 (NCH<sub>2</sub>), 28.0 (CH<sub>2</sub>), 26.2 (CH<sub>2</sub>), 22.3 (CH<sub>2</sub>), 21.9 (NHC=OCH<sub>3</sub>); HRMS (ESI-TOF) calcd for C<sub>31</sub>H<sub>52</sub>N<sub>3</sub>O<sub>28</sub>S<sub>2</sub> [M-4Na+3H]<sup>-</sup>: 978.2179; found: 978.2157.

12. GlcNS-IdoA-GlcNS6S-IdoA

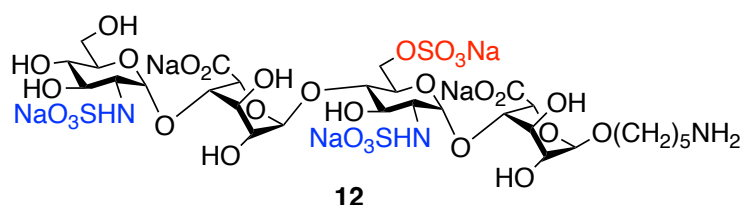

**5-Aminopentanyl 2-deoxy-2-sulfamino- $\alpha$ -D-glucopyranosyl-(1 $\rightarrow$ 4)- $\alpha$ -L-idopyranosyluronate-(1 $\rightarrow$ 4)-2-deoxy-2-sulfamino-6-O-sulfonato- $\alpha$ -D-glucopyranosyl-(1 $\rightarrow$ 4)- $\alpha$ -L-idopyranoside uronate penta sodium salt (12).**

Compound **S10** (46 mg, 0.019 mmol) was subjected to hydrolysis, N<sub>3</sub> to NH<sub>2</sub> conversion, N-sulfation and hydrogenation according to the general procedures to obtain **12** (7.5 mg, 36% for four steps). <sup>1</sup>H NMR (400 MHz, D<sub>2</sub>O):  $\delta$  5.26 (d, *J* = 3.7 Hz, 1H, H-1'), 5.24 (d, *J* = 3.5 Hz, 1H, H-1'''), 4.91 (d, *J* = 2.5 Hz, 1H, H-1''), 4.78 (d, *J* = 2.7 Hz, 1H, H-1), 4.71 (m, 1H, H-5''), 4.40 (d, *J* = 2.8 Hz, 1H, H-5), 4.24 (dd, *J* = 2.3, 11.3 Hz, 1H, H-6'a), 4.11 (dd, *J* = 2.3, 11.3 Hz, 1H, H-6'b), 4.04–4.00 (m, 1H, H-3, H-3''), 3.98–3.90 (m, 3H, H-4, H-5', H-4''), 3.72–3.51 (m, 10H, H-2, H-3', H-4', H-2'', H-3''', H-5''', H-6'''a, H-6'''b, OCH<sub>2</sub>), 3.37 (appt, *J* = 9.5 Hz, 1H, H-4'''), 3.16 (dd, *J* = 10.3, 3.8 Hz, 1H, H-2'), 3.08 (dd, *J* = 10.3, 3.6 Hz, 1H, H-2'''), 2.90 (t, *J* = 7.4 Hz, 2H, NCH<sub>2</sub>), 1.92 (s, 3H, C=OCH<sub>3</sub>), 1.66–1.49 (m, 4H, 2 X CH<sub>2</sub>), 1.41–1.31 (m, 2H, CH<sub>2</sub>); <sup>13</sup>C NMR (100 MHz, D<sub>2</sub>O):  $\delta$  175.5 (C-6'''), 175.2 (C-6), 101.9 (C-1''), 100.7 (C-1), 95.60 (C-1'), 95.56 (C-1'''), 77.5 (C-4'), 74.83 (C-4 or C-4''), 74.33 (C-4 or C-4'''), 71.6 (C-5'''), 71.3 (C-3'''), 69.8 (C-3'), 69.7 (C-4'''), 69.0 (C-2), 68.9 (C-5'), 68.6 (C-2'', C-5''), 68.3 (C-5), 68.1 (C-3 or C-3'''), 68.0 (C-3 or C-3''), 67.8 (OCH<sub>2</sub>), 66.2 (C-6'), 60.2 (C-6'''), 57.9 (C-2 and C-2'''), 39.4 (NCH<sub>2</sub>), 28.0 (CH<sub>2</sub>), 26.2 (CH<sub>2</sub>), 22.3 (CH<sub>2</sub>), 21.9 (NHC=OCH<sub>3</sub>); HRMS (ESI-TOF) calcd for C<sub>29</sub>H<sub>50</sub>N<sub>3</sub>O<sub>30</sub>S<sub>3</sub> [M-5Na+4H]<sup>-</sup>: 1016.1641; found: 1016.1660.

13. GlcNAc-IdoA2S-GlcNAc-IdoA

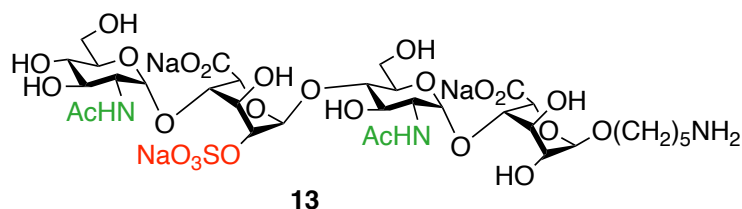

**5-Aminopentanyl 2-deoxy-2-acetamido- $\alpha$ -D-glucopyranosyl-(1 $\rightarrow$ 4)-2-O-sulfonato- $\alpha$ -L-idopyranosyluronate-(1 $\rightarrow$ 4)-2-deoxy-acetamido- $\alpha$ -D-glucopyranosyl-(1 $\rightarrow$ 4)- $\alpha$ -L-idopyranoside uronate tri sodium salt (13).**

Compound **S47** (35 mg, 0.014 mmol) was subjected to hydrolysis, *N*-acetylation and hydrogenation according to the general procedures to give tetrasaccharide **13** (11 mg, 78% for three steps).  $^1\text{H}$  NMR (400 MHz,  $\text{D}_2\text{O}$ ):  $\delta$  5.09 (s, 1H, H-1''), 5.06 (d,  $J$  = 3.6 Hz, 1H, H-1'), 5.01 (d,  $J$  = 3.5 Hz, 1H, H-1'''), 4.80 (d,  $J$  = 1.7 Hz, 1H, H-5''), 4.76 (d,  $J$  = 3.0 Hz, 1H, H-1), 4.41 (d,  $J$  = 2.8 Hz, 1H, H-5), 4.23 (s, 1H, H-2''), 4.19 (s, 1H, H-3''), 3.94–3.93 (m, 2H, H-4'', H-4), 3.89–3.81 (m, 3H, H-2', H-2''', H-3), 3.80–3.65 (m, 8H, H-6', H-6''', H-3', H-5', H-5''',  $\text{OCH}_2$ ), 3.65–3.47 (m, 4H, H-3''', H-4', H-2,  $\text{OCH}_2$ ), 3.36 (t,  $J$  = 9.0 Hz, 1H, H-4'''), 2.89 (t,  $J$  = 7.5 Hz, 2H,  $\text{NCH}_2$ ), 1.97 (s, 3H,  $\text{NHC}=\text{OCH}_3$ ), 1.91 (s, 3H,  $\text{NHC}=\text{OCH}_3$ ), 1.62–1.52 (m, 4H, 2 X  $\text{CH}_2$ ), 1.39–1.31 (m, 2H,  $\text{CH}_2$ );  $^{13}\text{C}$  NMR (100 MHz,  $\text{D}_2\text{O}$ ):  $\delta$  175.7 (C-6''), 174.9 (C-6), 174.8 ( $\text{NHC}=\text{O}$ ), 174.3 ( $\text{NHC}=\text{O}$ ), 100.8 (C-1), 99.2 (C-1''), 94.5 (C-1'), 93.5 (C-1'''), 77.1 (C-4'), 73.9 (C-4), 73.3 (C-2''), 71.9 (C-5'''), 71.27 (C-5'), 71.25 (C-3'''), 70.3 (C-4''), 69.7 (C-4'''), 69.6 (C-3'), 69.5 (C-2), 68.9 (C-5), 68.7 (C-3), 68.1 ( $\text{OCH}_2$ ), 67.4 (C-5''), 63.3 (C-3''), 60.2 (C-6'''), 59.6 (C-6'), 53.9 (C-2'), 53.3 (C-2'''), 39.3 ( $\text{NCH}_2$ ), 28.0 ( $\text{CH}_2$ ), 26.2 ( $\text{CH}_2$ ), 22.23 ( $\text{CH}_2$ ), 22.19 ( $\text{NHC}=\text{OCH}_3$ ), 21.88 ( $\text{NHC}=\text{OCH}_3$ ); HRMS (ESI-TOF) calcd for  $\text{C}_{33}\text{H}_{54}\text{N}_3\text{O}_{26}\text{S}$  [ $\text{M}-3\text{Na}+2\text{H}$ ] $^-$ : 940.2716; found: 940.2701.

14. GlcNAc-IdoA2S-GlcNS-IdoA



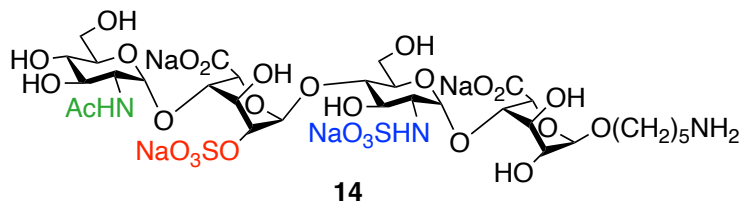

**5-Aminopentanyl 2-deoxy-2-acetamido- $\alpha$ -D-glucopyranosyl-(1 $\rightarrow$ 4)-2-O-sulfonato- $\alpha$ -L-idopyranosyluronate-(1 $\rightarrow$ 4)-2-deoxy-2-sulfamino- $\alpha$ -D-glucopyranosyl-(1 $\rightarrow$ 4)- $\alpha$ -L-idopyranoside uronate tetra sodium salt (14).**

Compound **S47** (35 mg, 0.014 mmol) was subjected to hydrolysis, *N*-acetylation and hydrogenation according to the general procedures to give tetrasaccharide **14** (11 mg, 75% for three steps).  $^1\text{H}$  NMR (400 MHz,  $\text{D}_2\text{O}$ ):  $\delta$  5.26 (d,  $J = 3.6$  Hz, 1H, H-1'), 5.09 (s, 1H, H-1''), 5.01 (d,  $J = 3.5$  Hz, 1H, H-1'''), 4.84 (d,  $J = 1.7$  Hz, 1H, H-5''), 4.78 (d,  $J = 2.6$  Hz, 1H, H-1), 4.40 (d,  $J = 2.4$  Hz, 1H, H-5), 4.22 (s, 1H, H-2''), 4.19 (s, 1H, H-3''), 4.02 (t,  $J = 3.9$  Hz, 1H, H-3), 3.94–3.93 (m, 2H, H-4'', H-4), 3.88 (dd,  $J = 10.4, 3.4$  Hz, 1H, H-2'''), 3.78–3.64 (m, 7H, H-6', H-6''', H-5', H-5''',  $\text{OCH}_2$ ), 3.64–3.51 (m, 5H, H-3', H-3''', H-4', H-2,  $\text{OCH}_2$ ), 3.36 (t,  $J = 9.3$  Hz, 1H, H-4'''), 3.13 (dd,  $J = 9.5, 3.6$  Hz, 1H, H-2'), 2.89 (t,  $J = 7.5$  Hz, 2H,  $\text{NCH}_2$ ), 1.97 (s, 3H,  $\text{NHC}=\text{OCH}_3$ ), 1.62–1.52 (m, 4H, 2 X  $\text{CH}_2$ ), 1.39–1.31 (m, 2H,  $\text{CH}_2$ );  $^{13}\text{C}$  NMR (100 MHz,  $\text{D}_2\text{O}$ ):  $\delta$  175.8 (C-6''), 175.2 (C-6), 174.8 ( $\text{NHC}=\text{O}$ ), 100.7 (C-1), 99.1 (C-1''), 95.6 (C-1'), 93.5 (C-1'''), 77.2 (C-4'), 74.8 (C-4), 73.3 (C-2''), 71.8 (C-5'''), 71.3 (C-3'''), 71.0 (C-5'), 70.3 (C-4''), 69.8 (C-4'''), 69.7 (C-3'), 69.0 (C-2), 68.5 (C-5), 68.3 (C-3), 68.0 ( $\text{OCH}_2$ ), 67.4 (C-5''), 63.2 (C-3''), 60.2 (C-6'''), 59.7 (C-6'), 58.1 (C-2'), 53.3 (C-2'''), 39.3 ( $\text{NCH}_2$ ), 28.0 ( $\text{CH}_2$ ), 26.2 ( $\text{CH}_2$ ), 22.22 ( $\text{CH}_2$ ), 22.20 ( $\text{NHC}=\text{OCH}_3$ ); HRMS (ESI-TOF) calcd for  $\text{C}_{31}\text{H}_{52}\text{N}_3\text{O}_{28}\text{S}_2$  [ $\text{M}-4\text{Na}+3\text{H}$ ] $^-$ : 978.2179; found: 978.2172.

**15. GlcNS-IdoA2S-GlcNAc-IdoA**

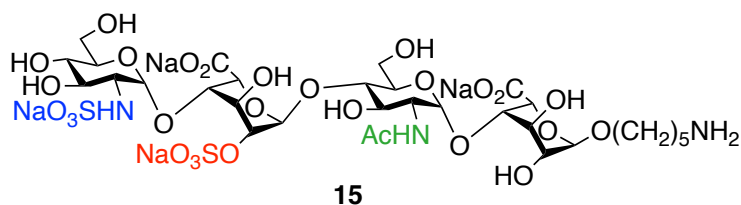

**5-Aminopentanyl 2-deoxy-2-sulfamino- $\alpha$ -D-glucopyranosyl-(1 $\rightarrow$ 4)-2-O-sulfonato- $\alpha$ -L-idopyranosyluronate-(1 $\rightarrow$ 4)-2-deoxy-2-acetamido- $\alpha$ -D-glucopyranosyl-(1 $\rightarrow$ 4)- $\alpha$ -L-idopyranoside uronate tetra sodium salt (15).**

Compound **S20** (48 mg, 0.019 mmol) was subjected to hydrolysis, N<sub>3</sub> to NH<sub>2</sub> conversion, N-sulfation and hydrogenation according to the general procedures to obtain **15** (5.1 mg, 28% for five steps). <sup>1</sup>H NMR (400 MHz, D<sub>2</sub>O):  $\delta$  5.23 (d, *J* = 3.6 Hz, 1H, H-1'''), 5.13 (d, *J* = 2.6 Hz, 1H, H-1''), 5.06 (d, *J* = 3.6 Hz, 1H, H-1'), 4.76 (d, *J* = 2.7 Hz, 1H, H-1), 4.72 (m, 1H, H-5''), 4.41 (d, *J* = 3.1 Hz, 1H, H-5), 4.24 (dd, *J* = 2.6, 4.4 Hz, 1H, H-2''), 4.14 (appt, *J* = 4.4 Hz, H-3''), 3.97–3.92 (m, 2H, H-4, H-4''), 3.88–3.82 (m, 3H, H-3, H-2', H-6'a), 3.78–3.63 (m, 8H, H-3', H-4', H-5', H-6'b, H-5''', H-6'''a, H-6'''b, OCH<sub>2</sub>), 3.59–3.53 (m, 2H, H-3''', OCH<sub>2</sub>), 3.49 (dd, *J* = 2.7, 5.6 Hz, 1H, H-2), 3.58 (appt, *J* = 9.7 Hz, 1H, H-4'''), 3.11 (dd, *J* = 10.3, 3.6 Hz, 1H, H-2'''), 2.89 (t, *J* = 7.5 Hz, 2H, NCH<sub>2</sub>), 1.92 (s, 3H, C=OCH<sub>3</sub>), 1.62–1.50 (m, 4H, 2 X CH<sub>2</sub>), 1.39–1.30 (m, 2H, CH<sub>2</sub>); <sup>13</sup>C NMR (100 MHz, D<sub>2</sub>O):  $\delta$  175.3 (C-6''), 174.9 (C-6), 174.3 (CONH), 100.8 (C-1), 99.2 (C-1''), 97.1 (C-1'''), 94.5 (C-1'), 76.9 (C-4'), 75.6 (C-4''), 75.0 (C-2''), 74.1 (C-4), 71.6 (C-5'''), 71.3 (C-5'), 71.0 (C-3'''), 69.9 (C-4'''), 69.6 (2C, C-2, C-3'), 69.1 (C-5), 68.9 (C-3), 68.4 (C-5''), 68.1 (C-3''), 68.0 (OCH<sub>2</sub>), 60.2 (C-6'''), 59.6 (C-6'), 58.1 (C-2'''), 53.8 (C-2'), 39.4 (NCH<sub>2</sub>), 28.0 (CH<sub>2</sub>), 26.2 (CH<sub>2</sub>), 22.2 (CH<sub>2</sub>), 21.9 (NHC=OCH<sub>3</sub>); HRMS (ESI-TOF) calcd for C<sub>31</sub>H<sub>52</sub>N<sub>3</sub>O<sub>28</sub>S<sub>2</sub> [M–4Na+3H]<sup>-</sup>: 978.2179; found: 978.2173.

**16. GlcNS-IdoA2S-GlcNS-IdoA**

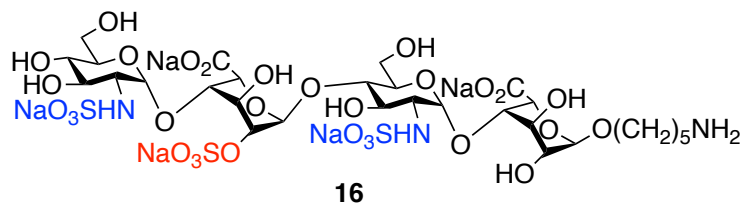

**5-Aminopentanyl 2-deoxy-2-sulfamino- $\alpha$ -D-glucopyranosyl-(1 $\rightarrow$ 4)-2-O-sulfonato- $\alpha$ -L-idopyranosyluronate-(1 $\rightarrow$ 4)-2-deoxy-2-sulfamino- $\alpha$ -D-glucopyranosyl-(1 $\rightarrow$ 4)- $\alpha$ -L-idopyranoside uronate penta sodium salt (16).**

Compound **S20** (48 mg, 0.019 mmol) was subjected to hydrolysis, N<sub>3</sub> to NH<sub>2</sub> conversion, N-sulfation and hydrogenation according to the general procedures to obtain **16** (5.8 mg, 28% for four steps). <sup>1</sup>H NMR (400 MHz, D<sub>2</sub>O): δ 5.26 (d, *J* = 3.8 Hz, 1H, H-1'), 5.22 (d, *J* = 3.5 Hz, 1H, H-1'''), 5.15 (bs, 1H, H-1''), 4.78 (d, *J* = 2.9 Hz, 1H, H-1), 4.76 (d, *J* = 2.3 Hz, 1H, H-5''), 4.40 (d, *J* = 2.6 Hz, 1H, H-5), 4.23 (dd, *J* = 1.8, 4.0 Hz, 1H, H-2''), 4.14 (appt, *J* = 4.0 Hz, 1H, H-3''), 4.02 (appt, *J* = 4.0 Hz, 1H, H-3), 3.97–3.91 (m, 2H, H-4, H-4''), 3.83–3.50 (m, 12H, H-2, H-3', H-4', H-5', H-6a', H-6b', H-5''', H-3''', H-6a''', H-6b''', OCH<sub>2</sub>), 3.36 (appt, *J* = 8.7 Hz, 1H, H-4'''), 3.17–3.06 (m, 2H, H-2', H-2'''), 2.90 (t, *J* = 7.5 Hz, 2H, NCH<sub>2</sub>), 1.65–1.49 (m, 4H, 2 X CH<sub>2</sub>), 1.41–1.29 (m, 2H, CH<sub>2</sub>); <sup>13</sup>C NMR (100 MHz, D<sub>2</sub>O): δ 175.4 (C-6''), 175.2 (C-6), 100.7 (C-1), 99.1 (C-1''), 97.2 (C-1'''), 95.7 (C-1'), 77.0 (C-4'), 75.6 (C-4''), 74.9 (C-4), 74.7 (C-2''), 71.6 (C-5'), 71.0 (2C, C-3', C-5'''), 69.9 (C-4'''), 69.7 (C-3'''), 69.1 (C-2), 68.5 (C-5), 68.3 (C-3), 68.2 (C-5''), 68.1 (OCH<sub>2</sub>), 67.8 (C-3''), 60.2 (C-6'''), 59.7 (C-6'), 58.1 (C-2' or C-2'''), 58.0 (C-2' or C-2''), 39.4 (NCH<sub>2</sub>), 28.0 (CH<sub>2</sub>), 26.2 (CH<sub>2</sub>), 22.2 (CH<sub>2</sub>); HRMS (ESI-TOF) calcd for C<sub>29</sub>H<sub>50</sub>N<sub>3</sub>O<sub>30</sub>S<sub>3</sub> [M-5Na+4H]<sup>-</sup>: 1016.1641; found: 1016.1647.

#### 17. GlcNAc6S-IdoA-GlcNAc-IdoA

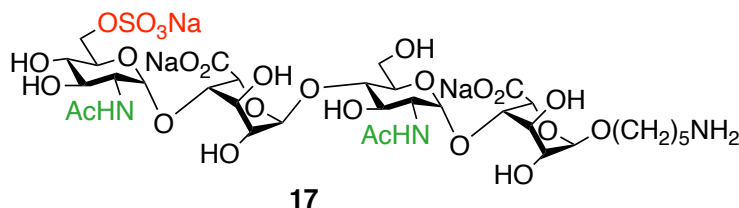

**5-Aminopentanyl 2-deoxy-2-acetamido-6-O-sulfonato- $\alpha$ -D-glucopyranosyl-(1 $\rightarrow$ 4)- $\alpha$ -L-idopyranosyluronate-(1 $\rightarrow$ 4)-2-deoxy-acetamido- $\alpha$ -D-glucopyranosyl-(1 $\rightarrow$ 4)- $\alpha$ -L-idopyranoside uronate tri sodium salt (17).**

Compound **S39** (16 mg, 0.0070 mmol) was subjected to O-sulfation, hydrolysis, N-acetylation and hydrogenation according to the general procedures to give tetrasaccharide **17** (5.0 mg, 70% for four steps). <sup>1</sup>H NMR (400 MHz, D<sub>2</sub>O): δ 5.10 (d, *J* =

3.7 Hz, 1H, H-1'''), 5.06 (d,  $J = 3.7$  Hz, 1H, H-1'), 4.82 (d,  $J = 3.6$  Hz, 1H, H-1''), 4.76 (d,  $J = 3.0$  Hz, 1H, H-1), 4.65 (d,  $J = 3.0$  Hz, 1H, H-5''), 4.41 (d,  $J = 2.7$  Hz, 1H, H-5), 4.25 (dd,  $J = 11.1, 2.9$  Hz, 1H, H-6'''), 4.11 (dd,  $J = 11.1, 1.7$  Hz, 1H, H-6'''), 4.00 (t,  $J = 3.4$  Hz, 1H, H-4''), 3.93 (t,  $J = 2.7$  Hz, 1H, H-4), 3.91–3.72 (m, 8H, H-5''', H-2', H-2''', H-3, H-5', H-3'', H-6'), 3.71–3.50 (m, 7H, OCH<sub>2</sub>, H-3''', H-3', H-2'', H-4', H-2), 3.47 (t,  $J = 9.5$  Hz, 1H, H-4'''), 2.89 (t,  $J = 7.5$  Hz, 2H, NCH<sub>2</sub>), 1.93 (s, 3H, C=OCH<sub>3</sub>), 1.92 (s, 3H, C=OCH<sub>3</sub>), 1.64–1.54 (m, 4H, 2 X CH<sub>2</sub>), 1.41–1.33 (m, 2H, CH<sub>2</sub>); <sup>13</sup>C NMR (100 MHz, D<sub>2</sub>O):  $\delta$  175.0 (C-6), 174.8 (C-6''), 174.34 (CONH), 174.31 (CONH), 101.7 (C-1''), 100.8 (C-1), 94.6 (C-1'), 94.3 (C-1'''), 76.7 (C-4'), 74.3 (C-4''), 74.1 (C-4), 71.1 (C-5'), 71.0 (C-3'''), 70.1 (C-5'''), 69.9 (C-2''), 69.8 (C-5''), 69.6 (C-3''), 69.4 (C-3', C-2), 69.1 (C-4'''), 68.9 (C-5), 68.7 (C-3), 68.1 (OCH<sub>2</sub>), 66.4 (C-6'''), 59.6 (C-6'), 53.7 (C-2'), 53.3 (C-2'''), 39.3 (NCH<sub>2</sub>), 28.0 (CH<sub>2</sub>), 26.2 (CH<sub>2</sub>), 22.2 (CH<sub>2</sub>), 21.9 (CH<sub>3</sub>C=ONH, CH<sub>3</sub>C=ONH); HRMS (ESI-TOF) calcd for C<sub>33</sub>H<sub>54</sub>N<sub>3</sub>O<sub>26</sub>S [M–3Na+2H]<sup>-</sup>: 940.2716; found: 940.2693.

18. GlcNAc6S-IdoA-GlcNS-IdoA

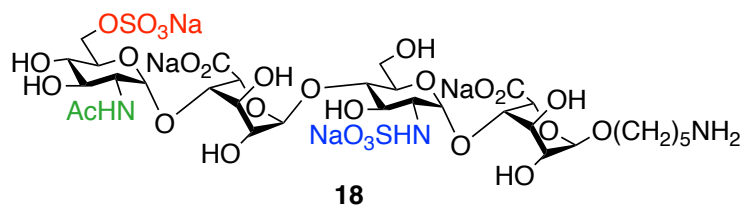

**5-Aminopentanyl 2-deoxy-2-acetamido-6-O-sulfonato- $\alpha$ -D-glucopyranosyl-(1 $\rightarrow$ 4)- $\alpha$ -L-idopyranosyluronate-(1 $\rightarrow$ 4)-2-deoxy-2-sulfamino- $\alpha$ -D-glucopyranosyl-(1 $\rightarrow$ 4)- $\alpha$ -L-idopyranoside uronate tetra sodium salt (18).**

Compound **S39** (11 mg, 0.0052 mmol) was subjected to O-sulfation, hydrolysis, N-sulfation and hydrogenation according to the general procedures to give tetrasaccharide **18** (3.0 mg, 61% for four steps). <sup>1</sup>H NMR (400 MHz, D<sub>2</sub>O):  $\delta$  5.27 (d,  $J = 3.5$  Hz, 1H, H-1'), 5.12 (d,  $J = 3.5$  Hz, 1H, H-1'''), 4.84 (d,  $J = 3.6$  Hz, 1H, H-1''), 4.80 (d,  $J = 2.2$  Hz, 1H, H-1), 4.65 (d,  $J = 2.1$  Hz, 1H, H-5''), 4.41 (d,  $J = 2.2$  Hz, 1H, H-5), 4.28 (dd,  $J = 11.2, 2.7$  Hz, 1H, H-6'''), 4.12 (dd,  $J = 11.2, 1.7$  Hz, 1H, H-6'''), 4.05 (t,  $J = 3.7$  Hz, 1H, H-3), 4.02 (t,

$J = 3.1$  Hz, 1H, H-4''), 3.95 (t,  $J = 2.7$  Hz, 1H, H-4), 3.92–3.88 (m, 1H, H-5'''), 3.87 (dd,  $J = 10.5, 3.6$  Hz, 1H, H-2'''), 3.81–3.74 (m, 4H, H-3'', H-5', H-6'), 3.71–3.53 (m, 7H, OCH<sub>2</sub>, H-3''', H-3', H-2'', H-4', H-2), 3.49 (t,  $J = 9.7$  Hz, 1H, H-4'''), 3.16 (dd,  $J = 10.0, 3.6$  Hz, 1H, H-2'), 2.91 (t,  $J = 7.5$  Hz, 2H, NCH<sub>2</sub>), 1.94 (s, 3H, C=OCH<sub>3</sub>), 1.64–1.54 (m, 4H, 2 X CH<sub>2</sub>), 1.41–1.33 (m, 2H, CH<sub>2</sub>); <sup>13</sup>C NMR (100 MHz, D<sub>2</sub>O):  $\delta$  175.3 (C-6), 174.9 (C-6''), 174.3 (CONH), 101.4 (C-1'''), 100.7 (C-1), 95.7 (C-1'), 94.3 (C-1'''), 76.8 (C-4'), 74.9 (C-4), 74.3 (C-4''), 71.0 (C-3'''), 70.9 (C-5'), 70.1 (C-5'''), 69.86 (C-5''), 69.84 (C-3'), 69.6 (C-3''), 69.5 (C-2''), 69.1 (C-4'''), 69.0 (C-2), 68.4 (C-5), 68.2 (C-3), 68.0 (OCH<sub>2</sub>), 66.3 (C-6'''), 59.7 (C-6'), 57.9 (C-2'), 53.4 (C-2'''), 39.3 (NCH<sub>2</sub>), 27.9 (CH<sub>2</sub>), 26.2 (CH<sub>2</sub>), 22.2 (CH<sub>2</sub>), 21.9 (CH<sub>3</sub>C=O); HRMS (ESI-TOF) calcd for C<sub>31</sub>H<sub>49</sub>N<sub>3</sub>O<sub>28</sub>S<sub>2</sub>Na<sub>3</sub> [M-Na]: 1044.1637; found: 1044.1621.

19. GlcNS6S-IdoA-GlcNAc-IdoA

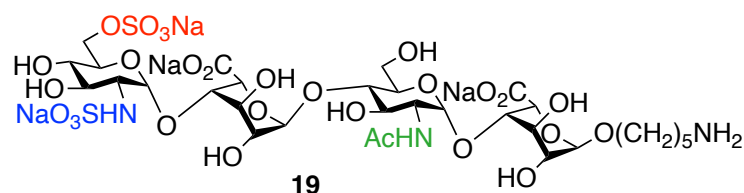

**5-Aminopentanyl 2-deoxy-2-sulfamino-6-O-sulfonato- $\alpha$ -D-glucopyranosyl-(1 $\rightarrow$ 4)- $\alpha$ -L-idopyranosyluronate-(1 $\rightarrow$ 4)-2-deoxy-2-acetamido- $\alpha$ -D-glucopyranosyl-(1 $\rightarrow$ 4)- $\alpha$ -L-idopyranoside uronate tetra sodium salt (19).**

Compound **S18** (22 mg, 0.0091 mmol) was subjected to hydrolysis, *N*-acetylation, N<sub>3</sub> to NH<sub>2</sub>, *N*-sulfation and hydrogenation according to the general procedures to give tetrasaccharide **19** (5.0 mg, 51% for five steps). <sup>1</sup>H NMR (400 MHz, D<sub>2</sub>O):  $\delta$  5.31 (d,  $J = 3.3$  Hz, 1H, H-1'''), 5.06 (d,  $J = 3.6$  Hz, 1H, H-1'), 4.85 (d,  $J = 2.9$  Hz, 1H, H-1''), 4.77 (d,  $J = 2.8$  Hz, 1H, H-1), 4.67 (d,  $J = 2.2$  Hz, 1H, H-5''), 4.41 (d,  $J = 2.5$  Hz, 1H, H-5), 4.26 (dd,  $J = 11.1, 2.5$  Hz, 1H, H-6'''), 4.09 (dd,  $J = 11.1, 1.5$  Hz, 1H, H-6'''), 4.00–3.99 (m, 2H, H-3'', H-4''), 3.94 (t,  $J = 2.7$  Hz, 1H, H-4), 3.88–3.73 (m, 6H, H-2', H-3, H-5''', H-5', H-6'), 3.71–3.61 (m, 4H, H-2'', H-4', H-3', OCH<sub>2</sub>), 3.57–3.44 (m, 4H, H-3''', H-2, OCH<sub>2</sub>, H-4'''),

3.14 (dd,  $J = 9.9, 3.4$  Hz, 1H, H-2'''), 2.90 (t,  $J = 7.5$  Hz, 2H, NCH<sub>2</sub>), 1.92 (s, 3H, NHC=OCH<sub>3</sub>), 1.62–1.52 (m, 4H, 2 X CH<sub>2</sub>), 1.39–1.31 (m, 2H, CH<sub>2</sub>); <sup>13</sup>C NMR (100 MHz, D<sub>2</sub>O):  $\delta$  175.1 (C-6''), 175.0 (C-6), 174.3 (NHC=O), 101.7 (C-1'''), 100.8 (C-1), 95.3 (C-1'''), 94.5 (C-1'), 76.9 (C-4'), 74.8 (C-4''), 74.0 (C-4), 71.1 (C-3''' and C-5'), 69.9 (C-5'''), 69.7 (C-3'), 69.4 (C-2''), 69.3 (C-2), 69.2 (C-5''), 69.1 (C-4'''), 68.9 (C-5), 68.8 (C-3''), 68.7 (C-3), 68.1 (OCH<sub>2</sub>), 66.4 (C-6'''), 59.6 (C-6'), 57.7 (C-2'''), 53.7 (C-2'), 39.4 (NCH<sub>2</sub>), 28.0 (CH<sub>2</sub>), 26.2 (CH<sub>2</sub>), 22.2 (CH<sub>2</sub>), 21.9 (NHC=OCH<sub>3</sub>); HRMS (ESI-TOF) calcd for C<sub>31</sub>H<sub>52</sub>N<sub>3</sub>O<sub>28</sub>S<sub>2</sub> [M–4Na+3H]<sup>-</sup>: 978.2179; found: 978.2166.

## 20. GlcNS6S-IdoA-GlcNS-IdoA

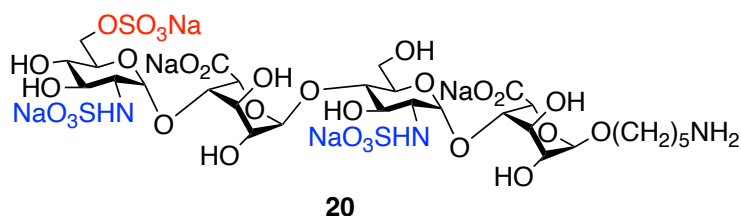

### 5-Aminopentanyl 2-deoxy-2-sulfamino-6-O-sulfonato- $\alpha$ -D-glucopyranosyl-(1 $\rightarrow$ 4)- $\alpha$ -L-idopyranosyluronate-(1 $\rightarrow$ 4)-2-deoxy-2-sulfamino- $\alpha$ -D-glucopyranosyl-(1 $\rightarrow$ 4)- $\alpha$ -L-idopyranoside uronate tetra sodium salt (**20**).

Compound **S18** (42 mg, 0.017 mmol) was subjected to hydrolysis, *N*-acetylation, N<sub>3</sub> to NH<sub>2</sub>, *N*-sulfation and hydrogenation according to the general procedures to give tetrasaccharide **20** (12 mg, 61% for five steps). <sup>1</sup>H NMR (400 MHz, D<sub>2</sub>O):  $\delta$  5.31 (d,  $J = 3.5$  Hz, 1H, H-1'''), 5.26 (d,  $J = 3.5$  Hz, 1H, H-1'), 4.86 (d,  $J = 2.9$  Hz, 1H, H-1''), 4.79 (d,  $J = 2.0$  Hz, 1H, H-1), 4.70 (1H, H-5''), 4.41 (d,  $J = 2.1$  Hz, 1H, H-5), 4.27 (dd,  $J = 11.0, 2.5$  Hz, 1H, H-6'''), 4.09 (dd,  $J = 11.0, 1.5$  Hz, 1H, H-6'''), 4.03 (t,  $J = 3.5$  Hz, 1H, H-3), 4.01–3.99 (m, 2H, H-3'', H-4''), 3.94 (t,  $J = 2.7$  Hz, 1H, H-4), 3.87–3.84 (m, 1H, H-5'''), 3.78–3.72 (m, 3H, H-6', H-5'), 3.69–3.50 (m, 7H, H-2'', H-4', H-3', OCH<sub>2</sub>, H-2, H-3'''), 3.48 (t,  $J = 9.3$  Hz, 1H, H-4'''), 3.15 (dd,  $J = 10.0, 3.6$  Hz, 1H, H-2'), 3.15 (dd,  $J = 10.0, 3.6$  Hz, 1H, H-2'''), 2.91 (t,  $J = 7.5$  Hz, 2H, NCH<sub>2</sub>), 1.62–1.52 (m, 4H, 2 X CH<sub>2</sub>), 1.39–1.31 (m, 2H,

CH<sub>2</sub>); <sup>13</sup>C NMR (100 MHz, D<sub>2</sub>O): δ 175.3 (C-6), 175.2 (C-6''), 101.6 (C-1''), 100.7 (C-1), 95.6 (C-1'), 95.4 (C-1'''), 77.1 (C-4'), 74.8 (C-4 and C-4''), 71.1 (C-3'''), 70.9 (C-5'), 69.9 (C-5'''), 69.7 (C-3'), 69.3 (C-2''), 69.2 (C-5''), 69.1 (C-4'''), 68.9 (C-2), 68.7 (C-3''), 68.3 (C-5), 68.1 (C-3 and OCH<sub>2</sub>), 66.4 (C-6'''), 59.7 (C-6'), 57.9 (C-2'), 57.7 (C-2'''), 39.4 (NCH<sub>2</sub>), 27.9 (CH<sub>2</sub>), 26.3 (CH<sub>2</sub>), 22.2 (CH<sub>2</sub>); HRMS (ESI-TOF) calcd for C<sub>29</sub>H<sub>50</sub>N<sub>3</sub>O<sub>28</sub>S<sub>3</sub> [M-5Na+4H]<sup>-</sup>: 1016.1641; found: 1016.1664.

### 21. GlcNAc-IdoA-GlcNAc6S-IdoA2S

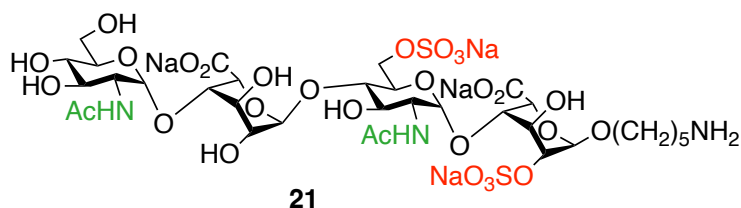

**5-Aminopentanyl 2-deoxy-2-acetamido- $\alpha$ -D-glucopyranosyl-(1 $\rightarrow$ 4)- $\alpha$ -L-idopyranosyluronate-(1 $\rightarrow$ 4)-2-deoxy-acetamido-6-O-sulfonato- $\alpha$ -D-glucopyranosyl-(1 $\rightarrow$ 4)-2-O-sulfonato- $\alpha$ -L-idopyranoside uronate tetra sodium salt (21).**

Compound **S25** (25 mg, 0.010 mmol) was subjected to hydrolysis, *N*-acetylation and hydrogenation according to the general procedures to give tetrasaccharide **21** (7.0 mg, 65% for three steps). <sup>1</sup>H NMR (400 MHz, D<sub>2</sub>O): δ 5.07 (d, *J* = 3.5 Hz, 1H, H-1'''), 5.02 (d, *J* = 3.5 Hz, 1H, H-1'), 5.01 (s, 1H, H-1), 4.87 (d, *J* = 3.1 Hz, 1H, H-1''), 4.67 (d, *J* = 2.7 Hz, 1H, H-5''), 4.41 (d, *J* = 1.9 Hz, 1H, H-5), 4.25 (dd, *J* = 11.2, 2.6 Hz, 1H, H-6'), 4.17 (dd, *J* = 11.2, 1.4 Hz, 1H, H-6''), 4.15 (s, 1H, H-3), 4.13 (s, 1H, H-2), 3.99–3.92 (m, 4H, H-4'', H-4, H-5', H-2'), 3.85–3.80 (m, 2H, H-2''', H-3''), 3.74–3.53 (m, 9H, H-6''', H-5''', H-3''', H-2'', H-4', H-3', OCH<sub>2</sub>), 3.37 (t, *J* = 9.5 Hz, 1H, H-4'''), 2.91 (t, *J* = 7.5 Hz, 2H, NCH<sub>2</sub>), 1.96 (s, 3H, NHC=OCH<sub>3</sub>), 1.93 (s, 3H, NHC=OCH<sub>3</sub>), 1.62–1.52 (m, 4H, 2 X CH<sub>2</sub>), 1.39–1.31 (m, 2H, CH<sub>2</sub>); <sup>13</sup>C NMR (100 MHz, D<sub>2</sub>O): δ 175.2 (C-6), 175.1 (C-6''), 174.7 (NHC=O), 174.4 (NHC=O), 101.8 (C-1''), 98.5 (C-1), 94.3 (C-1'''), 93.7 (C-1'), 76.7 (C-4'), 74.0 (C-4''), 73.9

(C-2), 71.9 (C-5'''), 71.1 (C-3'''), 71.0 (C-4, C-3'), 69.6 (C-4'''), 69.48 (C-2''), 69.45 (C-5''), 69.1 (C-5'), 69.0 (C-3''), 68.1 (OCH<sub>2</sub>), 66.9 (C-5), 66.2 (C-6'), 63.9 (C-3), 60.1 (C-6'''), 53.5 (C-2'''), 53.4 (C-2'), 39.4 (NCH<sub>2</sub>), 27.8 (CH<sub>2</sub>), 26.2 (CH<sub>2</sub>), 22.3 (NHC=OCH<sub>3</sub>), 22.2 (CH<sub>2</sub>), 21.9 (NHC=OCH<sub>3</sub>); HRMS (ESI-TOF) calcd for C<sub>33</sub>H<sub>54</sub>N<sub>3</sub>O<sub>29</sub>S<sub>2</sub> [M-4Na+3H]<sup>-</sup>: 1020.2284; found: 1020.2263.

## 22. GlcNAc-IdoA-GlcNS6S-IdoA2S

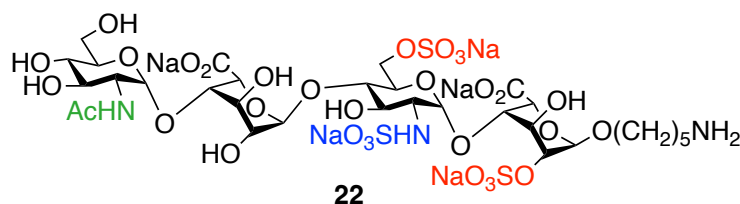

**5-Aminopentanyl 2-deoxy-2-acetamido- $\alpha$ -D-glucopyranosyl-(1 $\rightarrow$ 4)- $\alpha$ -L-idopyranosyluronate-(1 $\rightarrow$ 4)-2-deoxy-2-sulfamino-6-O-sulfonato- $\alpha$ -D-glucopyranosyl-(1 $\rightarrow$ 4)-2-O-sulfonato- $\alpha$ -L-idopyranoside uronate penta sodium salt (22).**

Compound **S25** (34 mg, 0.014 mmol) was subjected to hydrolysis, *N*-sulfation and hydrogenation according to the general procedures to give tetrasaccharide **22** (12 mg, 75% for three steps). <sup>1</sup>H NMR (400 MHz, D<sub>2</sub>O):  $\delta$  5.28 (d, *J* = 3.4 Hz, 1H, H-1'), 5.07 (d, *J* = 3.6 Hz, 1H, H-1'''), 5.05 (s, 1H, H-1), 4.90 (d, *J* = 3.1 Hz, 1H, H-1''), 4.73 (d, *J* = 2.8 Hz, 1H, H-5''), 4.42 (d, *J* = 2.3 Hz, 1H, H-5), 4.25 (dd, *J* = 11.3, 2.0 Hz, 1H, H-6'), 4.16–4.14 (m, 2H, H-6', H-2, H-3), 4.00–3.96 (m, 3H, H-4'', H-4, H-5'), 3.85–3.82 (m, 2H, H-2'', H-3''), 3.74–3.53 (m, 9H, H-6''', H-5''', H-3''', H-2'', H-4', H-3', OCH<sub>2</sub>), 3.38 (t, *J* = 9.3 Hz, 1H, H-4'''), 3.19 (dd, *J* = 10.1, 3.4 Hz, 1H, H-2'), 2.91 (t, *J* = 7.5 Hz, 2H, NCH<sub>2</sub>), 1.93 (s, 3H, NHC=OCH<sub>3</sub>), 1.62–1.52 (m, 4H, 2 X CH<sub>2</sub>), 1.39–1.31 (m, 2H, CH<sub>2</sub>); <sup>13</sup>C NMR (100 MHz, D<sub>2</sub>O):  $\delta$  175.1 (C-6''), 174.8 (C-6), 174.5 (NHC=O), 101.7 (C-1''), 98.7 (C-1), 97.1 (C-1'), 94.4 (C-1'''), 76.8 (C-4'), 75.9 (C-4), 75.7 (C-2), 73.9 (C-4''), 71.9 (C-5'''), 71.1 (C-3'''), 69.6 (C-4''', C-3'), 69.3 (C-2''), 69.2 (C-5''), 69.1 (C-5'), 68.7 (C-3''), 68.3 (C-3), 68.12 (C-5), 68.08 (OCH<sub>2</sub>), 66.2 (C-6'), 60.1 (C-6'''), 58.0 (C-2'), 53.5 (C-2'''), 39.4 (NCH<sub>2</sub>), 27.8



(CH<sub>2</sub>), 26.2 (CH<sub>2</sub>), 22.2 (CH<sub>2</sub>), 21.9 (NHC=OCH<sub>3</sub>); HRMS (ESI-TOF) calcd for C<sub>31</sub>H<sub>52</sub>N<sub>3</sub>O<sub>31</sub>S<sub>3</sub> [M-5Na+4H]<sup>-</sup>: 1058.1747; found: 1058.1744.

23. GlcNS-IdoA-GlcNAc6S-IdoA2S

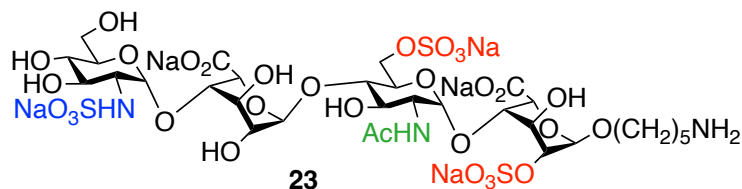

**5-Aminopentanyl 2-deoxy-2-sulfamino- $\alpha$ -D-glucopyranosyl-(1 $\rightarrow$ 4)- $\alpha$ -L-idopyranosyluronate-(1 $\rightarrow$ 4)-2-deoxy-2-acetamido-6-O-sulfonato- $\alpha$ -D-glucopyranosyl-(1 $\rightarrow$ 4)-2-O-sulfonato- $\alpha$ -L-idopyranoside uronate penta sodium salt (23).**

Compound **88** (30 mg, 0.015 mmol) was subjected to *N*-acetylation, N<sub>3</sub> to NH<sub>2</sub>, *N*-sulfation and hydrogenation according to the general procedures to give tetrasaccharide **23** (14 mg, 78% for four steps). <sup>1</sup>H NMR (400 MHz, D<sub>2</sub>O):  $\delta$  5.26 (d, *J* = 3.6 Hz, 1H, H-1'''), 5.02 (d, *J* = 3.5 Hz, 1H, H-1'), 5.02 (s, 1H, H-1), 4.90 (d, *J* = 2.1 Hz, 1H, H-1''), 4.70 (d, 1H, H-5''), 4.47 (d, *J* = 2.0 Hz, 1H, H-5), 4.24 (dd, *J* = 11.2, 2.6 Hz, 1H, H-6'), 4.19–4.13 (m, 3H, H-6', H-2, H-3), 4.03 (t, *J* = 4.1 Hz, 1H, H-3'') 3.99–3.92 (m, 4H, H-4'', H-4, H-2', H-5'), 3.72–3.61 (m, 7H, H-6''', H-5''', H-2'', H-4', H-3', OCH<sub>2</sub>), 3.58–3.52 (m, 2H, H-3''', OCH<sub>2</sub>), 3.37 (t, *J* = 9.2 Hz, 1H, H-4'''), 3.10 (dd, *J* = 10.3, 3.5 Hz, 1H, H-2'''), 2.91 (t, *J* = 7.5 Hz, 2H, NCH<sub>2</sub>), 1.97 (s, 3H, NHC=OCH<sub>3</sub>), 1.62–1.52 (m, 4H, 2 X CH<sub>2</sub>), 1.39–1.31 (m, 2H, CH<sub>2</sub>); <sup>13</sup>C NMR (100 MHz, D<sub>2</sub>O):  $\delta$  175.4 (C-6''), 175.2 (C-6), 174.7 (NHC=O), 102.0 (C-1''), 98.5 (C-1), 95.5 (C-1'''), 93.7 (C-1'), 77.3 (C-4'), 74.4 (C-4''), 73.9 (C-2), 71.6 (C-5'''), 71.3 (C-3'''), 71.0 (C-4), 70.0 (C-3'), 69.7 (C-4'''), 69.1 (C-5'), 68.7 (C-5'', C-2''), 68.1 (OCH<sub>2</sub>), 67.9 (C-3''), 66.9 (C-5), 66.2 (C-6'), 63.9 (C-3), 60.2 (C-6'''), 57.8 (C-2'''), 53.4 (C-2'), 39.4 (NCH<sub>2</sub>), 27.9 (CH<sub>2</sub>), 26.2 (CH<sub>2</sub>), 22.3 (NHC=OCH<sub>3</sub>), 22.2 (CH<sub>2</sub>); HRMS (ESI-TOF) calcd for C<sub>31</sub>H<sub>52</sub>N<sub>3</sub>O<sub>31</sub>S<sub>3</sub> [M-5Na+4H]<sup>-</sup>: 1058.1747; found: 1058.1744.

24. GlcNS-IdoA-GlcNS6S-IdoA2S

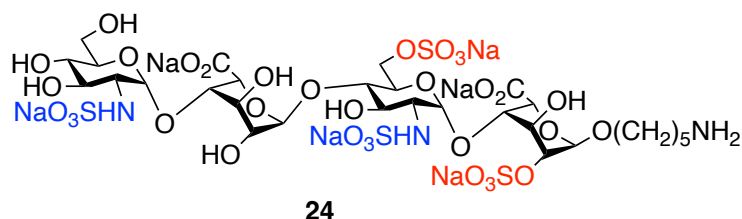

**5-Aminopentanyl 2-deoxy-2-sulfamino- $\alpha$ -D-glucopyranosyl-(1 $\rightarrow$ 4)- $\alpha$ -L-idopyranosyluronate-(1 $\rightarrow$ 4)-2-deoxy-2-sulfamino-6-O-sulfonato- $\alpha$ -D-glucopyranosyl-(1 $\rightarrow$ 4)-2-O-sulfonato- $\alpha$ -L-idopyranoside uronate hexa sodium salt (24).**

Compound **88** (25 mg, 0.013 mmol) was subjected to  $N_3$  to  $NH_2$ , *N*-sulfation and hydrogenation according to the general procedures to give tetrasaccharide **24** (12 mg, 78% for three steps).  $^1H$  NMR (400 MHz,  $D_2O$ ):  $\delta$  5.28 (d,  $J$  = 3.5 Hz, 1H, H-1'), 5.26 (d,  $J$  = 3.5 Hz, 1H, H-1'''), 5.05 (d,  $J$  = 1.3 Hz, 1H, H-1), 4.93 (d,  $J$  = 1.8 Hz, 1H, H-1''), 4.74 (d,  $J$  = 2.5 Hz, 1H, H-5''), 4.41 (d,  $J$  = 2.5 Hz, 1H, H-5), 4.25 (dd,  $J$  = 11.2, 2.0 Hz, 1H, H-6'), 4.17–4.12 (m, 3H, H-6', H-2, H-3), 4.03 (t,  $J$  = 4.0 Hz, 1H, H-3'') 3.98–3.96 (m, 3H, H-4'', H-4, H-5'), 3.72–3.53 (m, 9H, H-6''', H-5''', H-2'', H-4', H-3', H-3''',  $OCH_2$ ), 3.38 (t,  $J$  = 9.3 Hz, 1H, H-4'''), 3.18 (dd,  $J$  = 10.0, 3.6 Hz, 1H, H-2'), 3.10 (dd,  $J$  = 10.2, 3.5 Hz, 1H, H-2'''), 2.91 (t,  $J$  = 7.5 Hz, 2H,  $NCH_2$ ), 1.62–1.52 (m, 4H, 2 X  $CH_2$ ), 1.39–1.31 (m, 2H,  $CH_2$ );  $^{13}C$  NMR (100 MHz,  $D_2O$ ):  $\delta$  175.6 (C-6''), 174.8 (C-6), 101.9 (C-1''), 98.7 (C-1), 97.0 (C-1'), 95.5 (C-1'''), 77.5 (C-4'), 75.9 (C-4''), 75.8 (C-2), 74.3 (C-4), 71.6 (C-5'''), 71.3 (C-3'''), 69.7 (C-4'''), 69.6 (C-3'), 69.0 (C-5'), 68.6 (C-2''), 68.5 (C-5''), 68.4 (C-3), 68.2 (C-5), 68.1 ( $OCH_2$ ), 67.7 (C-3''), 66.3 (C-6'), 60.2 (C-6'''), 58.1 (C-2'), 57.8 (C-2'''), 39.4 ( $NCH_2$ ), 27.8 ( $CH_2$ ), 26.2 ( $CH_2$ ), 22.2 ( $CH_2$ ); HRMS (ESI-TOF) calcd for  $C_{29}H_{50}N_3O_{33}S_4$  [ $M-6Na+5H$ ] $^-$ : 1096.1198; found: 1096.1209.

25. GlcNAc-IdoA2S-GlcNAc-IdoA2S

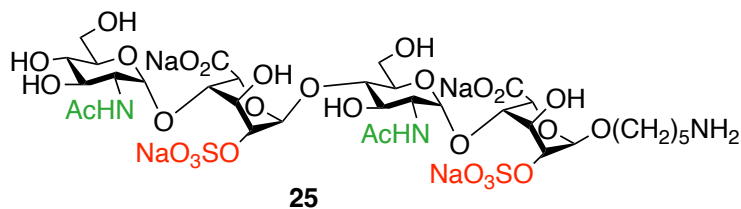

**5-Aminopentanyl 2-deoxy-2-acetamido- $\alpha$ -D-glucopyranosyl-(1 $\rightarrow$ 4)-2-O-sulfonato- $\alpha$ -L-idopyranosyluronate-(1 $\rightarrow$ 4)-2-deoxy-acetamido- $\alpha$ -D-glucopyranosyl-(1 $\rightarrow$ 4)-2-O-sulfonato- $\alpha$ -L-idopyranoside uronate tetra sodium salt (25).**

Compound **S33** (28 mg, 0.011 mmol) was subjected to hydrolysis, *N*-acetylation and hydrogenation according to the general procedures to give tetrasaccharide **25** (8.0 mg, 65% for three steps).  $^1\text{H}$  NMR (400 MHz,  $\text{D}_2\text{O}$ ):  $\delta$  5.08 (s, 1H, H-1''), 5.02–5.00 (m, 3H, H-1', H-1''', H-1), 4.81 (d,  $J$  = 1.2 Hz, 1H, H-5''), 4.45 (d,  $J$  = 1.8 Hz, 1H, H-5), 4.24 (s, 1H, H-2''), 4.20 (s, 1H, H-3''), 4.17 (s, sH, H-3), 4.12 (s, 1H, H-2), 3.94–3.86 (m, 4H, H-4, H-4'', H-2''', H-2'), 3.79–3.67 (m, 6H, H-6', H-6''', H-5', H-5'''), 3.67–3.53 (m, 5H, H-3''', H-4', H-3', OCH<sub>2</sub>), 3.36 (t,  $J$  = 9.2 Hz, 1H, H-4'''), 2.91 (t,  $J$  = 7.5 Hz, 2H, NCH<sub>2</sub>), 1.97 (s, 3H, NHC=OCH<sub>3</sub>), 1.96 (s, 3H, NHC=OCH<sub>3</sub>), 1.62–1.52 (m, 4H, 2 X CH<sub>2</sub>), 1.39–1.31 (m, 2H, CH<sub>2</sub>);  $^{13}\text{C}$  NMR (100 MHz,  $\text{D}_2\text{O}$ ):  $\delta$  175.8 (C-6''), 175.2 (C-6), 174.8 (NHC=O), 174.7 (NHC=O), 99.2 (C-1''), 98.5 (C-1), 93.5 (C-1', C-1'''), 77.2 (C-4'), 73.9 (C-2), 73.2 (C-2''), 71.9 (C-5'''), 71.3 (C-3'''), 71.2 (C-5'), 70.7 (C-4), 70.3 (C-4''), 69.9 (C-3'), 69.7 (C-4'''), 68.1 (OCH<sub>2</sub>), 67.3 (C-5''), 67.1 (C-5), 63.8 (C-3), 63.2 (C-3''), 60.2 (C-6'''), 59.7 (C-6'), 53.8 (C-2'), 53.4 (C-2'''), 39.4 (NCH<sub>2</sub>), 27.8 (CH<sub>2</sub>), 26.2 (CH<sub>2</sub>), 22.24 (NHC=OCH<sub>3</sub>), 22.20 (CH<sub>2</sub>), 22.15 (NHC=OCH<sub>3</sub>); HRMS (ESI-TOF) calcd for  $\text{C}_{33}\text{H}_{54}\text{N}_3\text{O}_{29}\text{S}_2$  [ $\text{M}-4\text{Na}+3\text{H}$ ] $^-$ : 1020.2284; found: 1020.2274.

**26. GlcNAc-IdoA2S-GlcNS-IdoA2S**

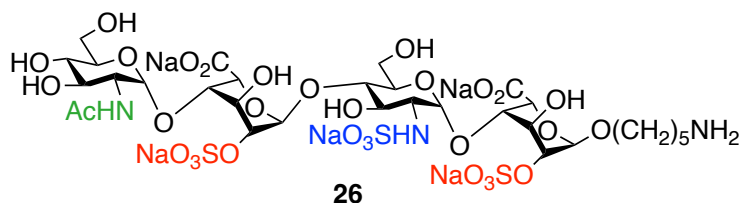

**5-Aminopentanyl 2-deoxy-2-acetamido- $\alpha$ -D-glucopyranosyl-(1 $\rightarrow$ 4)-2-O-sulfonato- $\alpha$ -L-idopyranosyluronate-(1 $\rightarrow$ 4)-2-deoxy-2-sulfamino- $\alpha$ -D-glucopyranosyl-(1 $\rightarrow$ 4)-2-O-sulfonato- $\alpha$ -L-idopyranoside uronate penta sodium salt (26).**

Compound **S33** (28 mg, 0.011 mmol) was subjected to hydrolysis, *N*-sulfation and hydrogenation according to the general procedures to give tetrasaccharide **26** (8.0 mg, 64% for three steps).  $^1\text{H}$  NMR (400 MHz,  $\text{D}_2\text{O}$ ):  $\delta$  5.29 (d,  $J = 3.5$  Hz, 1H, H-1'), 5.09 (s, 1H, H-1''), 5.02 (s, 1H, H-1), 5.02 (d,  $J = 3.6$  Hz, 1H, H-1'''), 4.86 (d,  $J = 1.8$  Hz, 1H, H-5''), 4.40 (d,  $J = 2.7$  Hz, 1H, H-5), 4.23 (s, 1H, H-2''), 4.19 (s, 1H, H-3''), 4.15–4.11 (m, 2H, H-2, H-3), 3.96 (t,  $J = 2.6$  Hz, 1H, H-4), 3.84 (s, 1H, H-4''), 3.88 (dd,  $J = 10.5, 3.5$  Hz, 1H, H-2'''), 3.80–3.67 (m, 6H, H-6', H-6''', H-5', H-5'''), 3.67–3.53 (m, 5H, H-3''', H-4', H-3'),  $\text{OCH}_2$ ), 3.37 (t,  $J = 9.4$  Hz, 1H, H-4'''), 3.15 (dd,  $J = 9.8, 3.5$  Hz, 1H, H-2'), 2.91 (t,  $J = 7.5$  Hz, 2H,  $\text{NCH}_2$ ), 1.97 (s, 3H,  $\text{NHC}=\text{OCH}_3$ ), 1.62–1.52 (m, 4H, 2 X  $\text{CH}_2$ ), 1.39–1.31 (m, 2H,  $\text{CH}_2$ );  $^{13}\text{C}$  NMR (100 MHz,  $\text{D}_2\text{O}$ ):  $\delta$  175.8 (C-6''), 174.8 (C-6,  $\text{NHC}=\text{O}$ ), 99.1 (C-1''), 98.9 (C-1), 96.7 (C-1'), 93.5 (C-1'''), 77.4 (C-4'), 76.2 (C-2), 75.8 (C-4), 73.2 (C-2''), 71.9 (C-5'''), 71.3 (C-3'''), 71.0 (C-5'), 70.3 (C-4''), 69.8 (C-4'''), 69.5 (C-3'), 68.8 (C-3), 68.6 (C-5), 68.0 ( $\text{OCH}_2$ ), 67.3 (C-5''), 63.2 (C-3''), 60.2 (C-6'''), 59.7 (C-6'), 58.3 (C-2'), 53.4 (C-2'''), 39.4 ( $\text{NCH}_2$ ), 27.8 ( $\text{CH}_2$ ), 26.2 ( $\text{CH}_2$ ), 22.20 ( $\text{CH}_2$ ), 22.18 ( $\text{NHC}=\text{OCH}_3$ ); HRMS (ESI-TOF) calcd for  $\text{C}_{31}\text{H}_{52}\text{N}_3\text{O}_{31}\text{S}_3$  [ $\text{M}-5\text{Na}+4\text{H}$ ] $^-$ : 1058.1747; found: 1058.1742.

**27. GlcNS-IdoA2S-GlcNAc-IdoA2S**

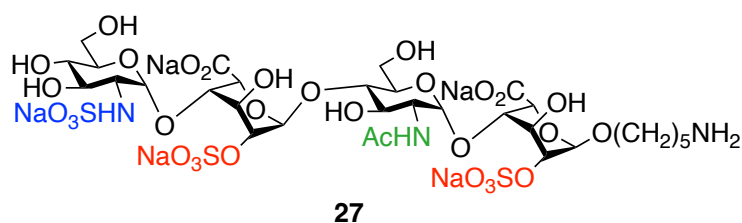

**5-Aminopentanyl 2-deoxy-2-sulfamino- $\alpha$ -D-glucopyranosyl-(1 $\rightarrow$ 4)-2-O-sulfonato- $\alpha$ -L-idopyranosyluronate-(1 $\rightarrow$ 4)-2-deoxy-2-acetamido- $\alpha$ -D-glucopyranosyl-(1 $\rightarrow$ 4)-2-O-sulfonato- $\alpha$ -L-idopyranoside uronate hexa sodium salt (27).**

Compound **90** (18 mg, 0.0081 mmol) was subjected to *N*-acetylation, N<sub>3</sub> to NH<sub>2</sub> conversion, *N*-sulfation and hydrogenation according to the general procedures to obtain **27** (5.8 mg, 56% for four steps). <sup>1</sup>H NMR (400 MHz, D<sub>2</sub>O): δ 5.21 (d, *J* = 3.4 Hz, 1H, H-1'''), 5.14 (bs, 1H, H-1''), 5.02 (d, *J* = 3.7 Hz, 1H, H-1'), 4.99 (bs, 1H, H-1), 4.74–4.71 (m, 1H, H-5''), 4.45 (d, *J* = 2.0 Hz, 1H, H-5), 4.26–4.23 (m, 1H, H-2''), 4.19–4.09 (m, 3H, H-2, H-3, H-3''), 3.98–3.86 (m, 2H, H-4, H-2', H-4''), 3.83–3.50 (m, 11H, H-3', H-4', H-5', H-6'a, H-6'b, H-3''', H-5''', H-6'''a, H-6'''b, OCH<sub>2</sub>), 3.36 (t, *J* = 9.5 Hz, 1H, H-4'''), 3.12 (dd, *J* = 10.3, 3.3 Hz, 1H, H-2'''), 2.91 (t, *J* = 7.5 Hz, 2H, NCH<sub>2</sub>), 1.96 (s, 3H, COCH<sub>3</sub>), 1.63–1.51 (m, 4H, 2 X CH<sub>2</sub>), 1.40–1.33 (m, 2H, CH<sub>2</sub>); <sup>13</sup>C NMR (100 MHz, D<sub>2</sub>O): δ 175.4 (C-6''), 175.2 (C-6), 174.7 (CONH), 99.2 (C-1''), 98.6 (C-1), 97.3 (C-1'''), 93.4 (C-1'), 77.0 (C-4'), 75.5 (C-4''), 74.6 (C-2''), 74.0 (C-2), 71.6 (C-5'''), 71.3 (C-5'), 71.0 (C-3'''), 70.8 (C-4), 69.89 (C-3' or C-4'''), 69.84 (C-3' or C-4'''), 68.2 (C-5''), 68.1 (OCH<sub>2</sub>), 67.7 (C-3''), 67.1 (C-5), 63.9 (C-3), 60.2 (C-6'''), 59.7 (C-6'), 58.2 (C-2'''), 53.6 (C-2'), 39.4 (NCH<sub>2</sub>), 27.8 (CH<sub>2</sub>), 26.2 (CH<sub>2</sub>), 22.24 (CH<sub>2</sub>), 21.9 (COCH<sub>3</sub>); HRMS (ESI-TOF) calcd for C<sub>31</sub>H<sub>52</sub>N<sub>3</sub>O<sub>31</sub>S<sub>3</sub> [M-5Na+4H]<sup>-</sup>: 1058.1747; found: 1058.1763.

## 28. GlcNS-IdoA2S-GlcNS-IdoA2S

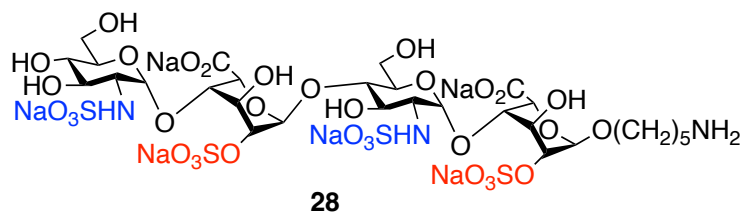

**5-Aminopentanyl 2-deoxy-2-acetamido- $\alpha$ -D-glucopyranosyl-(1 $\rightarrow$ 4)-2-O-sulfonato- $\alpha$ -L-idopyranosyluronate-(1 $\rightarrow$ 4)-2-deoxy-2-sulfamino- $\alpha$ -D-glucopyranosyl-(1 $\rightarrow$ 4)-2-O-sulfonato- $\alpha$ -L-idopyranoside uronate penta sodium salt (**28**).**

Compound **90** (22 mg, 0.010 mmol) was subjected to N<sub>3</sub> to NH<sub>2</sub>, *N*-sulfation and hydrogenation according to the general procedures to give tetrasaccharide **28** (9.0 mg, 68% for three steps). <sup>1</sup>H NMR (400 MHz, D<sub>2</sub>O): δ 5.29 (d, *J* = 3.6 Hz, 1H, H-1'), 5.22 (d, *J*

= 3.5 Hz, 1H, H-1'''), 5.16 (s, 1H, H-1''), 5.02 (d,  $J = 2.0$  Hz, 1H, H-1), 4.80 (d,  $J = 2.0$  Hz, 1H, H-5''), 4.41 (d,  $J = 2.6$  Hz, 1H, H-5), 4.25 (dd,  $J = 3.5, 1.7$  Hz, 1H, H-2''), 4.16–4.11 (m, 3H, H-2, H-3, H-3'''), 3.97–3.95 (m, 2H, H-4'', H-4), 3.80–3.70 (m, 6H, H-5', H-5''', H-6''', H-6'), 3.69–3.54 (m, 5H, H-3', H-4', OCH<sub>2</sub>, H-3'''), 3.37 (t,  $J = 9.6$  Hz, 1H, H-4'''), 3.15 (dd,  $J = 9.4, 3.4$  Hz, 1H, H-2'), 3.12 (dd,  $J = 9.5, 3.4$  Hz, 1H, H-2'''), 2.91 (t,  $J = 7.5$  Hz, 2H, NCH<sub>2</sub>), 1.62–1.52 (m, 4H, 2 X CH<sub>2</sub>), 1.39–1.31 (m, 2H, CH<sub>2</sub>); <sup>13</sup>C NMR (100 MHz, D<sub>2</sub>O):  $\delta$  175.4 (C-6'''), 174.7 (C-6), 99.0 (C-1'''), 98.9 (C-1), 97.4 (C-1'''), 96.7 (C-1'), 77.2 (C-4'), 76.3 (C-2), 75.8 (C-4), 75.5 (C-4'''), 74.4 (C-2''), 71.7 (C-5'''), 71.1 (C-5'), 71.0 (C-3'''), 69.9 (C-4'''), 69.5 (C-3'), 68.9 (C-3), 68.6 (C-5), 68.1 (OCH<sub>2</sub>, C-5''), 67.6 (C-3''), 60.2 (C-6'''), 59.7 (C-6'), 58.2 (C-2'), 58.1 (C-2'''), 39.4 (NCH<sub>2</sub>), 27.8 (CH<sub>2</sub>), 26.2 (CH<sub>2</sub>), 21.9 (CH<sub>2</sub>); HRMS (ESI-TOF) calcd for C<sub>29</sub>H<sub>50</sub>N<sub>3</sub>O<sub>33</sub>S<sub>4</sub> [M–6Na+5H]<sup>–</sup>: 1096.1209; found: 1096.1198.

## 29. GlcNAc6S-IdoA-GlcNAc-IdoA2S

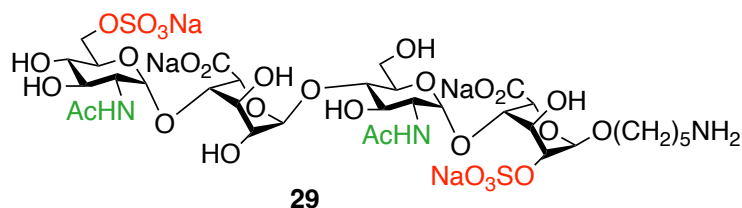

**5-Aminopentanyl 2-deoxy-2-acetamido- $\alpha$ -D-glucopyranosyl-(1 $\rightarrow$ 4)-2-O-sulfonato- $\alpha$ -L-idopyranosyluronate-(1 $\rightarrow$ 4)-2-deoxy-acetamido- $\alpha$ -D-glucopyranosyl-(1 $\rightarrow$ 4)-2-O-sulfonato- $\alpha$ -L-idopyranoside uronate tetra sodium salt (29).**

Compound **S35** (43 mg, 0.018 mmol) was subjected to hydrolysis, *N*-acetylation and hydrogenation according to the general procedures to give tetrasaccharide **29** (15 mg, 76% for three steps). <sup>1</sup>H NMR (400 MHz, D<sub>2</sub>O):  $\delta$  5.11 (d,  $J = 3.5$  Hz, 1H, H-1'''), 5.02 (d,  $J = 3.5$  Hz, 1H, H-1'), 5.01 (s, 1H, H-1), 4.82 (d,  $J = 3.8$  Hz, 1H, H-1''), 4.66 (d,  $J = 3.0$  Hz, 1H, H-5''), 4.46 (d,  $J = 2.0$  Hz, 1H, H-5), 4.26 (dd,  $J = 11.1, 2.1$  Hz, 1H, H-6'''), 4.17–4.09 (m, 3H, H-2, H-3, H-6'''), 4.00 (t,  $J = 3.4$  Hz, 1H, H-4''), 3.93–3.85 (m, 4H, H-4, H-2', H-2''',

H-5'''), 3.81–3.70 (m, 4H, H-6', H-3'', H-5'), 3.68–3.53 (m, 6H, H-3''', H-2'', H-4', H-3', OCH<sub>2</sub>), 3.48 (t, *J* = 9.5 Hz, 1H, H-4'''), 2.91 (t, *J* = 7.5 Hz, 2H, NCH<sub>2</sub>), 1.97 (s, 3H, NHC=OCH<sub>3</sub>), 1.94 (s, 3H, NHC=OCH<sub>3</sub>), 1.62–1.52 (m, 4H, 2 X CH<sub>2</sub>), 1.39–1.31 (m, 2H, CH<sub>2</sub>); <sup>13</sup>C NMR (100 MHz, D<sub>2</sub>O): δ 175.2 (C-6), 174.9 (C-6'''), 174.7 (NHC=O), 174.4 (NHC=O), 101.6 (C-1'''), 98.5 (C-1), 94.4 (C-1'''), 93.7 (C-1'), 76.7 (C-4'), 74.4 (C-4'''), 73.9 (C-2), 71.1 (C-5'), 71.0 (C-3'''), 70.9 (C-4), 70.1 (C-5'''), 69.8 (C-5'', C-3', C-2''), 69.6 (C-3''), 69.1 (C-4'''), 68.1 (OCH<sub>2</sub>), 67.1 (C-5), 66.4 (C-6'''), 64.0 (C-3), 59.7 (C-6'), 53.5 (C-2'), 53.4 (C-2'''), 39.4 (NCH<sub>2</sub>), 27.7 (CH<sub>2</sub>), 26.2 (CH<sub>2</sub>), 22.24 (CH<sub>2</sub>), 22.18 (NHC=OCH<sub>3</sub>), 21.9 (NHC=OCH<sub>3</sub>); HRMS (ESI-TOF) calcd for C<sub>33</sub>H<sub>54</sub>N<sub>3</sub>O<sub>29</sub>S<sub>2</sub> [M–4Na+3H]<sup>-</sup>: 1020.2284; found: 1020.2266.

### 30. GlcNAc6S-IdoA-GlcNS-IdoA2S

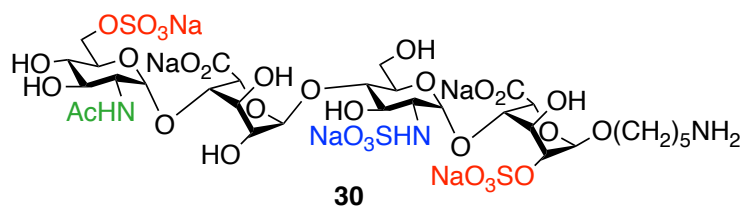

**5-Aminopentanyl 2-deoxy-2-acetamido-6-O-sulfonato- $\alpha$ -D-glucopyranosyl-(1 $\rightarrow$ 4)- $\alpha$ -L-idopyranosyluronate-(1 $\rightarrow$ 4)-2-deoxy-2-sulfamino- $\alpha$ -D-glucopyranosyl-(1 $\rightarrow$ 4)-2-O-sulfonato- $\alpha$ -L-idopyranoside uronate penta sodium salt (30).**

Compound **S35** (30 mg, 0.013 mmol) was subjected to hydrolysis, *N*-acetylation and hydrogenation according to the general procedures to give tetrasaccharide **30** (11 mg, 74% for three steps). <sup>1</sup>H NMR (400 MHz, D<sub>2</sub>O): δ 5.27 (d, *J* = 3.5 Hz, 1H, H-1'), 5.09 (d, *J* = 3.5 Hz, 1H, H-1'''), 5.03 (s, 1H, H-1), 4.82 (d, *J* = 3.6 Hz, 1H, H-1''), 4.68 (d, *J* = 2.0 Hz, 1H, H-5''), 4.39 (d, *J* = 2.4 Hz, 1H, H-5), 4.26 (dd, *J* = 11.2, 2.9 Hz, 1H, H-6'''), 4.14–4.09 (m, 3H, H-2, H-3, H-6'''), 3.99 (t, *J* = 3.4 Hz, 1H, H-4''), 3.96–3.95 (m, 1H, H-4), 3.90–3.87 (m, 1H, H-5'''), 3.86 (dd, *J* = 10.4, 3.7 Hz, 1H, H-2'''), 3.81–3.70 (m, 4H, H-6', H-3'', H-5'), 3.70–3.53 (m, 6H, H-3''', H-2'', H-4', H-3', OCH<sub>2</sub>), 3.37 (t, *J* = 9.6 Hz, 1H, H-4'''), 3.16 (dd, *J* = 10.0, 3.5 Hz, 1H, H-2'), 2.91 (t, *J* = 7.5 Hz, 2H, NCH<sub>2</sub>), 1.93 (s, 3H,

NHC=OCH<sub>3</sub>), 1.62–1.52 (m, 4H, 2 X CH<sub>2</sub>), 1.39–1.31 (m, 2H, CH<sub>2</sub>); <sup>13</sup>C NMR (100 MHz, D<sub>2</sub>O): δ 175.0 (C-6''), 174.9 (C-6), 174.4 (NHC=O), 101.5 (C-1''), 98.7 (C-1), 96.9 (C-1'), 94.4 (C-1'''), 76.9 (C-4'), 75.89 (C-4), 75.86 (C-2), 74.4 (C-4''), 71.0 (C-5'), 70.9 (C-3'''), 70.1 (C-5'''), 69.8 (C-5'', C-2''), 69.5 (C-3'', C-3'), 69.0 (C-4'''), 68.6 (C-3), 68.4 (C-5), 68.0 (OCH<sub>2</sub>), 66.4 (C-6'''), 59.8 (C-6'), 58.2 (C-2'), 53.4 (C-2'''), 39.4 (NCH<sub>2</sub>), 27.8 (CH<sub>2</sub>), 26.2 (CH<sub>2</sub>), 22.2 (CH<sub>2</sub>), 21.9 (NHC=OCH<sub>3</sub>); HRMS (ESI-TOF) calcd for C<sub>31</sub>H<sub>52</sub>N<sub>3</sub>O<sub>31</sub>S<sub>3</sub> [M–5Na+4H]<sup>–</sup>: 1058.1747; found: 1058.1742.

### 31. GlcNS6S-IdoA-GlcNAc-IdoA2S

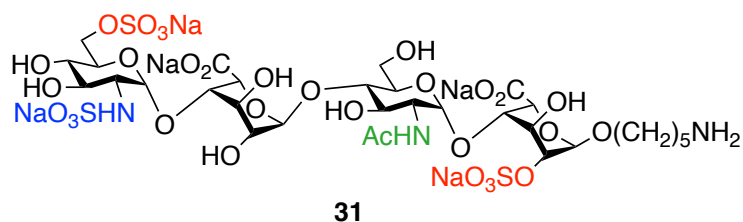

### **5-Aminopentanyl 2-deoxy-2-sulfamino-6-O-sulfonato- $\alpha$ -D-glucopyranosyl-(1 $\rightarrow$ 4)- $\alpha$ -L-idopyranosyluronate-(1 $\rightarrow$ 4)-2-deoxy-2-acetamido- $\alpha$ -D-glucopyranosyl-(1 $\rightarrow$ 4)-2-O-sulfonato- $\alpha$ -L-idopyranoside uronate penta sodium salt (31).**

Compound **91** (31 mg, 0.015 mmol) was subjected to *N*-acetylation, N<sub>3</sub> to NH<sub>2</sub> conversion, *N*-sulfation and hydrogenation according to the general procedures to obtain **31** (11 mg, 66% for four steps). <sup>1</sup>H NMR (400 MHz, D<sub>2</sub>O): δ 5.31 (d, *J* = 3.7 Hz, 1H, H-1'''), 5.04–4.99 (m, 2H, H-1, H-1'), 4.84 (d, *J* = 3.4 Hz, 1H, H-1''), 4.66 (d, *J* = 2.4 Hz, 1H, H-5''), 4.45 (d, *J* = 2.3 Hz, 1H, H-5), 4.26 (dd, *J* = 11.1, 2.6 Hz, 1H, H-6'''a), 4.16–4.06 (m, 2H, H-2, H-3, H-6'''b), 4.01–3.97 (m, 2H, H-3'', H-4''), 3.93–3.89 (m, 2H, H-4, H-2'), 3.87–3.82 (m, 1H, H-5'''), 3.81–3.43 (m, 10H, H-3', H-4', H-5', H-6'a, H-6'b, H-2'', H-3''', H-4''', OCH<sub>2</sub>), 3.13 (dd, *J* = 10.0, 3.6 Hz, 1H, H-2'''), 2.91 (t, *J* = 7.4 Hz, 2H, NCH<sub>2</sub>), 1.97 (s, 3H, C=OCH<sub>3</sub>), 1.66–1.52 (m, 4H, 2 X CH<sub>2</sub>), 1.42–1.32 (m, 2H, CH<sub>2</sub>); <sup>13</sup>C NMR (100 MHz, D<sub>2</sub>O): δ 175.2 (C-6), 175.1 (C-6''), 174.7 (CONH), 101.6 (C-1''), 98.5 (C-1), 95.3 (C-1'''), 93.6 (C-1'), 76.9 (C-3'), 74.8 (C-4''), 74.0 (C-2), 71.12 (C-4' or C-3'''), 71.09 (C-4' or C-3'''), 70.9 (C-4), 69.8



(2C, C-5' and C-5'''), 69.32 (C-4'''), 69.28 (C-5''), 69.1 (C-2''), 68.8 (C-3''), 68.1 (OCH<sub>2</sub>), 67.0 (C-5), 66.4 (C-6'''), 64.1 (C-3), 59.7 (C-6'), 57.7 (C-2'''), 53.5 (C-2'), 39.4 (NCH<sub>2</sub>), 27.8 (CH<sub>2</sub>), 26.2 (CH<sub>2</sub>), 22.2 (CH<sub>2</sub>); HRMS (ESI-TOF) calcd for C<sub>31</sub>H<sub>52</sub>N<sub>3</sub>O<sub>31</sub>S<sub>3</sub> [M-5Na+4H]<sup>-</sup>: 1058.1747; found: 1058.1741.

### 32. GlcNS6S-I doA-GlcNS-I doA2S

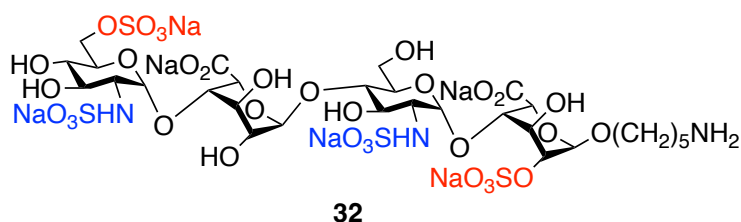

**5-Aminopentanyl 2-deoxy-2-sulfamino-6-O-sulfonato- $\alpha$ -D-glucopyranosyl-(1 $\rightarrow$ 4)- $\alpha$ -L-idopyranosyluronate-(1 $\rightarrow$ 4)-2-deoxy-2-sulfamino- $\alpha$ -D-glucopyranosyl-(1 $\rightarrow$ 4)-2-O-sulfonato- $\alpha$ -L-idopyranoside uronate hexa sodium salt (32).**

Compound **91** (21 mg, 0.010 mmol) was subjected to N<sub>3</sub> to NH<sub>2</sub> conversion, N-sulfation and hydrogenation according to the general procedures to obtain **32** (6.3 mg, 52% for three steps). <sup>1</sup>H NMR (400 MHz, D<sub>2</sub>O):  $\delta$  5.31–5.25 (m, 2H, H-1', H-1'''), 5.02 (bs, 1H, H-1), 4.85 (d, *J* = 3.3 Hz, 1H, H-1''), 4.73–4.68 (m, 1H, H-5''), 4.40 (d, *J* = 2.6 Hz, 1H, H-5), 4.27 (dd, *J* = 11.1, 2.6 Hz, 1H, H-6'''a), 4.15–4.05 (m, 3H, H-2, H-3, H-6'''b), 4.01–3.94 (m, 3H, H-4, H-3'', H-4''), 3.88–3.43 (m, 11H, H-3', H-4', H-5', H-6'a, H-6'b, H-2'', H-3''', H-4''', H-5''', OCH<sub>2</sub>), 3.19–3.05 (m, 2H, H-2', H-2'''), 2.91 (t, *J* = 7.5 Hz, 2H, NCH<sub>2</sub>), 1.61–1.49 (m, 4H, 2 X CH<sub>2</sub>), 1.41–1.31 (m, 2H, CH<sub>2</sub>); <sup>13</sup>C NMR (100 MHz, D<sub>2</sub>O):  $\delta$  175.2 (C-6''), 174.8 (C-6), 101.5 (C-1''), 98.9 (C-1), 96.8 (C-1'''), 95.4 (C-1'), 77.1 (C-3'), 76.3 (C-2), 75.9 (C-4), 74.8 (C-4''), 71.1 (C-3'''), 70.9 (C-4'), 69.9 (C-5'''), 69.5 (C-2''), 69.3 (2C, C-5'', C-4'''), 69.1 (C-5'), 68.9 (C-3), 68.7 (C-3'''), 68.6 (C-5), 68.0 (OCH<sub>2</sub>), 66.4 (C-6'''), 59.8 (C-6'), 58.2 (C-2'), 57.7 (C-2'''), 39.4 (NCH<sub>2</sub>), 27.8 (CH<sub>2</sub>), 26.2 (CH<sub>2</sub>), 22.2 (CH<sub>2</sub>); HRMS (ESI-TOF) calcd for C<sub>29</sub>H<sub>51</sub>N<sub>3</sub>O<sub>33</sub>S<sub>4</sub> [M+4H-6Na]<sup>2-</sup>: 547.5566; found: 547.5566.

33. GlcNAc-IdoA2S-GlcNAc6S-IdoA

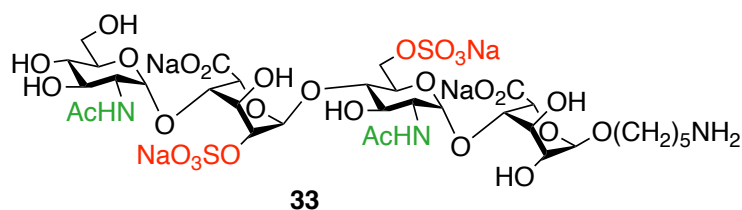

**5-Aminopentanyl 2-deoxy-2-acetamido- $\alpha$ -D-glucopyranosyl-(1 $\rightarrow$ 4)-2-O-sulfonato- $\alpha$ -L-idopyranosyluronate-(1 $\rightarrow$ 4)-2-deoxy-acetamido- $\alpha$ -D-glucopyranosyl-(1 $\rightarrow$ 4)-2-O-sulfonato- $\alpha$ -L-idopyranoside uronate tetra sodium salt (33).**

Compound **S45** (34 mg, 0.013 mmol) was subjected to hydrolysis, *N*-acetylation and hydrogenation according to the general procedures to give tetrasaccharide **33** (11 mg, 74% for three steps).  $^1\text{H}$  NMR (400 MHz,  $\text{D}_2\text{O}$ ):  $\delta$  5.10 (s, 1H, H-1''), 5.08 (d,  $J$  = 3.7 Hz, 1H, H-1'), 5.06 (d,  $J$  = 3.7 Hz, 1H, H-1'''), 4.81 (d,  $J$  = 2.1 Hz, 1H, H-5''), 4.77 (d,  $J$  = 3.1 Hz, 1H, H-1), 4.43 (d,  $J$  = 2.8 Hz, 1H, H-5), 4.25–4.16 (m, 4H, H-2'', H-3'', H-6'), 3.97–3.95 (m, 2H, H-4'', H-4, H-5'), 3.91–3.86 (m, 2H, H-2''', H-2'), 3.84 (dd,  $J$  = 5.3, 4.0 Hz, 1H, H-3), 3.80–3.66 (m, 6H, H-6''', H-5''', H-3', H-4',  $\text{OCH}_2$ ), 3.63–3.50 (m, 3H, H-3''', H-2,  $\text{OCH}_2$ ), 3.37 (t,  $J$  = 9.5 Hz, 1H, H-4'''), 2.89 (t,  $J$  = 7.5 Hz, 2H,  $\text{NCH}_2$ ), 1.97 (s, 3H,  $\text{NHC}=\text{OCH}_3$ ), 1.92 (s, 3H,  $\text{NHC}=\text{OCH}_3$ ), 1.62–1.52 (m, 4H, 2 X  $\text{CH}_2$ ), 1.39–1.31 (m, 2H,  $\text{CH}_2$ );  $^{13}\text{C}$  NMR (100 MHz,  $\text{D}_2\text{O}$ ):  $\delta$  175.5 (C-6''), 174.9 (C-6), 174.8 ( $\text{NHC}=\text{O}$ ), 174.3 ( $\text{NHC}=\text{O}$ ), 100.8 (C-1), 99.1 (C-1''), 94.3 (C-1'), 93.5 (C-1'''), 76.1 (C-4'), 73.9 (C-4), 73.8 (C-2''), 71.9 (C-5'''), 71.3 (C-3'''), 70.8 (C-4''), 69.8 (C-4''), 69.7 (C-3'), 69.4 (C-2), 69.3 (C-5'), 68.9 (C-5), 68.7 (C-3), 68.1 ( $\text{OCH}_2$ ), 67.9 (C-5''), 66.4 (C-6'), 64.0 (C-3'''), 60.3 (C-6'''), 53.6 (C-2'), 53.3 (C-2'''), 39.4 ( $\text{NCH}_2$ ), 28.0 ( $\text{CH}_2$ ), 26.3 ( $\text{CH}_2$ ), 22.26 ( $\text{NHC}=\text{OCH}_3$ ), 22.20 ( $\text{CH}_2$ ), 21.9 ( $\text{NHC}=\text{OCH}_3$ ); HRMS (ESI-TOF) calcd for  $\text{C}_{33}\text{H}_{54}\text{N}_3\text{O}_{29}\text{S}_2$  [ $\text{M}-4\text{Na}+3\text{H}$ ] $^-$ : 1020.2284; found: 1020.2299.

34. GlcNAc-IdoA2S-GlcNS6S-IdoA

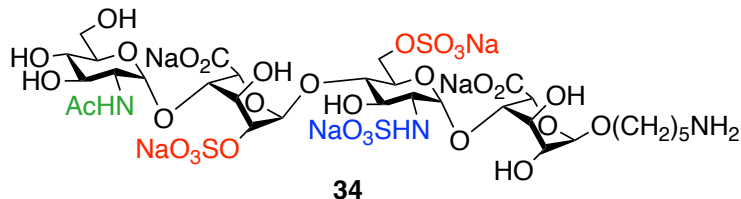

**5-Aminopentanyl 2-deoxy-2-acetamido- $\alpha$ -D-glucopyranosyl-(1 $\rightarrow$ 4)-2-O-sulfonato- $\alpha$ -L-idopyranosyluronate-(1 $\rightarrow$ 4)-2-deoxy-2-sulfamino-6-O-sulfonato- $\alpha$ -D-glucopyranosyl-(1 $\rightarrow$ 4)- $\alpha$ -L-idopyranoside uronate penta sodium salt (34).**

Compound **S45** (32 mg, 0.013 mmol) was subjected to hydrolysis, *N*-sulfation and hydrogenation according to the general procedures to give tetrasaccharide **34** (11 mg, 73% for three steps).  $^1\text{H}$  NMR (400 MHz,  $\text{D}_2\text{O}$ ):  $\delta$  5.27 (d,  $J = 3.4$  Hz, 1H, H-1'), 5.10 (s, 1H, H-1''), 5.06 (d,  $J = 3.3$  Hz, 1H, H-1'''), 4.84 (d,  $J = 1.5$  Hz, 1H, H-5''), 4.78 (d,  $J = 2.4$  Hz, 1H, H-1), 4.41 (d,  $J = 2.2$  Hz, 1H, H-5), 4.25–4.14 (m, 4H, H-2'', H-3'', H-6'), 4.01 (t,  $J = 3.7$  Hz, 1H, H-3), 3.97–3.96 (m, 2H, H-4'', H-4), 3.92–3.86 (m, 2H, H-2''', H-5'), 3.79–3.52 (m, 9H, H-6''', H-5''', H-3', H-3''', H-4', H-2,  $\text{OCH}_2$ ), 3.36 (t,  $J = 9.4$  Hz, 1H, H-4'''), 3.17 (dd,  $J = 10.3, 3.4$  Hz, 1H, H-2'), 2.89 (t,  $J = 7.5$  Hz, 2H,  $\text{NCH}_2$ ), 1.97 (s, 3H,  $\text{NHC}=\text{OCH}_3$ ), 1.62–1.52 (m, 4H, 2 X  $\text{CH}_2$ ), 1.39–1.31 (m, 2H,  $\text{CH}_2$ );  $^{13}\text{C}$  NMR (100 MHz,  $\text{D}_2\text{O}$ ):  $\delta$  175.5 (C-6''), 175.1 (C-6), 174.8 ( $\text{NHC}=\text{O}$ ), 100.7 (C-1), 99.0 (C-1''), 95.4 (C-1'), 93.5 (C-1'''), 76.1 (C-4'), 74.8 (C-4), 73.8 (C-2''), 71.9 (C-5'''), 71.3 (C-3'''), 70.7 (C-4''), 69.8 (C-4'', C-3'), 69.1 (C-2, C-5'), 68.5 (C-5), 68.3 (C-3), 68.0 ( $\text{OCH}_2$ ), 67.9 (C-5'''), 66.4 (C-6'), 63.9 (C-3''), 60.3 (C-6'''), 57.8 (C-2'), 53.3 (C-2'''), 39.4 ( $\text{NCH}_2$ ), 28.0 ( $\text{CH}_2$ ), 26.3 ( $\text{CH}_2$ ), 22.25 ( $\text{NHC}=\text{OCH}_3$ ), 22.20 ( $\text{CH}_2$ ); HRMS (ESI-TOF) calcd for  $\text{C}_{31}\text{H}_{52}\text{N}_3\text{O}_{31}\text{S}_3$  [ $\text{M}-5\text{Na}+4\text{H}$ ] $^-$ : 1058.1747; found: 1058.1774.

**35. GlcNS-IdoA2S-GlcNAc6S-IdoA**

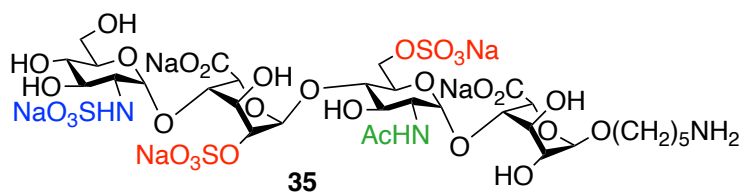

**5-Aminopentanyl 2-deoxy-2-sulfamino- $\alpha$ -D-glucopyranosyl-(1 $\rightarrow$ 4)-2-O-sulfonato- $\alpha$ -L-idopyranosyluronate-(1 $\rightarrow$ 4)-2-deoxy-2-acetamido-6-O-sulfonato- $\alpha$ -D-glucopyranosyl-(1 $\rightarrow$ 4)- $\alpha$ -L-idopyranoside uronate penta sodium salt (**35**).**

Compound **S14** (22 mg, 0.0088 mmol) was subjected to hydrolysis, *N*-acetylation,  $N_3$  to  $NH_2$ , *N*-sulfation and hydrogenation according to the general procedures to give tetrasaccharide **35** (5.0 mg, 48% for five steps).  $^1H$  NMR (400 MHz,  $D_2O$ ):  $\delta$  5.31 (d,  $J = 3.4$  Hz, 1H, H-1'''), 5.11 (d,  $J = 2.6$  Hz, 1H, H-1''), 5.07 (d,  $J = 3.6$  Hz, 1H, H-1'), 4.76 (d,  $J = 2.5$  Hz, 1H, H-1), 4.70 (1H, H-5''), 4.42 (d,  $J = 2.9$  Hz, 1H, H-5), 4.32 (dd,  $J = 11.2, 2.9$  Hz, 1H, H-6'), 4.25 (dd,  $J = 5.8, 2.9$  Hz, 1H, H-2''), 4.17 (dd,  $J = 11.2, 1.5$  Hz, 1H, H-6'), 4.12 (dd,  $J = 5.7, 3.6$  Hz, 1H, H-3''), 4.00 (t,  $J = 2.9$  Hz, 1H, H-4''), 3.97 (t,  $J = 3.4$  Hz, 1H, H-4), 3.94–3.87 (m, 1H, H-5', H-2'), 3.83 (dd,  $J = 5.5, 4.1$  Hz, 1H, H-3), 3.77–3.65 (m, 5H, H-5''', H-6''', H-4',  $OCH_2$ , H-3'), 3.59–3.49 (m, 2H, H-2,  $OCH_2$ , H-3'''), 3.35 (t,  $J = 9.4$  Hz, 1H, H-4'''), 3.12 (dd,  $J = 10.4, 3.5$  Hz, 1H, H-2'''), 2.90 (t,  $J = 7.5$  Hz, 2H,  $NCH_2$ ), 1.92 (s, 3H,  $NHC=OCH_3$ ), 1.62–1.52 (m, 4H, 2 X  $CH_2$ ), 1.39–1.31 (m, 2H,  $CH_2$ );  $^{13}C$  NMR (100 MHz,  $D_2O$ ):  $\delta$  174.9 (C-6, C-6'''), 174.3 ( $NHC=O$ ), 100.8 (C-1), 99.3 (C-1''), 96.7 (C-1'''), 94.4 (C-1'), 75.8 (C-4' and C-2''), 75.7 (C-4''), 74.1 (C-4), 71.7 (C-5'''), 71.1 (C-3'''), 69.9 (C-4'''), 69.7 (C-3'), 69.6 (C-2), 69.4 (C-5'), 69.2 (C-5''), 69.04 (C-3'''), 69.01 (C-5), 68.8 (C-3), 68.1 ( $OCH_2$ ), 66.4 (C-6'), 60.3 (C-6'''), 58.1 (C-2'''), 53.5 (C-2'), 39.4 ( $NCH_2$ ), 28.0 ( $CH_2$ ), 26.2 ( $CH_2$ ), 22.3 ( $NHC=OCH_3$ ), 22.2 ( $CH_2$ ); HRMS (ESI-TOF) calcd for  $C_{31}H_{52}N_3O_{31}S_3 [M-5Na+4H]^-$ : 1058.1747; found: 1058.1740.

**36. GlcNS-IdoA2S-GlcNS6S-IdoA**

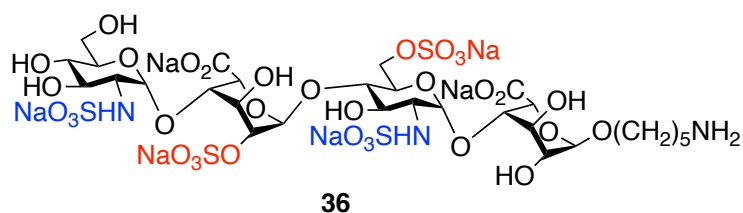

**5-Aminopentanyl 2-deoxy-2-sulfamino- $\alpha$ -D-glucopyranosyl-(1 $\rightarrow$ 4)-2-O-sulfonato- $\alpha$ -L-idopyranosyluronate-(1 $\rightarrow$ 4)-2-deoxy-2-acetamido-6-O-sulfonato- $\alpha$ -D-glucopyranosyl-(1 $\rightarrow$ 4)- $\alpha$ -L-idopyranoside uronate penta sodium salt (**36**).**

Compound **S14** (31 mg, 0.012 mmol) was subjected to hydrolysis, N<sub>3</sub> to NH<sub>2</sub>, N-sulfation and hydrogenation according to the general procedures to give tetrasaccharide **36** (8.0 mg, 53% for four steps). <sup>1</sup>H NMR (400 MHz, D<sub>2</sub>O):  $\delta$  5.31 (d,  $J$  = 3.5 Hz, 1H, H-1'''), 5.27 (d,  $J$  = 3.6 Hz, 1H, H-1'), 5.12 (d,  $J$  = 2.3 Hz, 1H, H-1''), 4.78 (d,  $J$  = 2.6 Hz, 1H, H-1), 4.72 (1H, H-5''), 4.41 (d,  $J$  = 2.6 Hz, 1H, H-5), 4.31 (dd,  $J$  = 11.2, 2.3 Hz, 1H, H-6'), 4.24 (dd,  $J$  = 5.6, 2.7 Hz, 1H, H-2''), 4.16–4.11 (m, 2H, H-6', H-3''), 4.04–3.99 (m, 2H, H-4'', H-3), 3.96 (t,  $J$  = 2.8 Hz, 1H, H-4), 3.90–3.87 (m, 1H, H-5'), 3.76–3.65 (m, 5H, H-5''', H-6''', H-4', OCH<sub>2</sub>), 3.59–3.53 (m, 4H, H-3', H-2, OCH<sub>2</sub>, H-3'''), 3.35 (t,  $J$  = 9.5 Hz, 1H, H-4'''), 3.17 (dd,  $J$  = 10.4, 3.7 Hz, 1H, H-2'), 3.12 (dd,  $J$  = 10.4, 3.4 Hz, 1H, H-2'''), 2.90 (t,  $J$  = 7.5 Hz, 2H, NCH<sub>2</sub>), 1.62–1.52 (m, 4H, 2 X CH<sub>2</sub>), 1.39–1.31 (m, 2H, CH<sub>2</sub>); <sup>13</sup>C NMR (100 MHz, D<sub>2</sub>O):  $\delta$  175.0 (C-6), 174.9 (C-6''), 100.7 (C-1), 99.2 (C-1''), 96.8 (C-1'''), 95.5 (C-1'), 75.84 (C-4'), 75.79 (C-2''), 75.69 (C-4''), 74.9 (C-4), 71.7 (C-5'''), 71.0 (C-3'''), 69.9 (C-4'''), 69.7 (C-3'), 69.21 (C-5'''), 69.16 (C-2), 69.1 (C-5'), 69.0 (C-3''), 68.6 (C-5), 68.4 (C-3), 68.0 (OCH<sub>2</sub>), 66.3 (C-6'), 60.3 (C-6'''), 58.1 (C-2'''), 57.7 (C-2'), 39.4 (NCH<sub>2</sub>), 28.0 (CH<sub>2</sub>), 26.2 (CH<sub>2</sub>), 22.2 (CH<sub>2</sub>); HRMS (ESI-TOF) calcd for C<sub>29</sub>H<sub>50</sub>N<sub>3</sub>O<sub>33</sub>S<sub>4</sub> [M–6Na+5H]<sup>-</sup>: 1096.1209; found: 1096.1194.

**37. GlcNAc6S-IdoA-GlcNAc6S-IdoA**

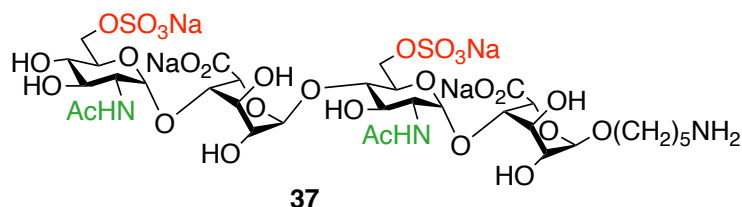

**5-Aminopentanyl 2-deoxy-2-acetamido-6-O-sulfonato- $\alpha$ -D-glucopyranosyl-(1 $\rightarrow$ 4)- $\alpha$ -L-idopyranosyluronate-(1 $\rightarrow$ 4)-2-deoxy-2-acetamido-6-O-sulfonato- $\alpha$ -D-glucopyranosyl-(1 $\rightarrow$ 4)- $\alpha$ -L-idopyranoside uronate tetra sodium salt (37).**

Compound **S43** (18 mg, 0.0075 mmol) was subjected to hydrolysis, *N*-acetylation and hydrogenation according to the general procedures to give tetrasaccharide **37** (4.0 mg, 53% for three steps).  $^1\text{H}$  NMR (400 MHz,  $\text{D}_2\text{O}$ ):  $\delta$  5.08 (d,  $J = 3.7$  Hz, 1H, H-1'''), 5.07 (d,  $J = 4.0$  Hz, 1H, H-1'), 4.88 (d,  $J = 3.0$  Hz, 1H, H-1''), 4.77 (d,  $J = 2.8$  Hz, 1H, H-1), 4.67 (d,  $J = 2.5$  Hz, 1H, H-5''), 4.42 (d,  $J = 2.6$  Hz, 1H, H-5), 4.28–4.24 (m, 2H, H-6', H-6'''), 4.15–4.09 (m, 2H, H-6', H-6'''), 4.00–3.95 (m, 3H, H-4'', H-5', H-4), 3.90–3.80 (m, 5H, H-5'', H-2', H-2''', H-3, H-3'''), 3.71–3.53 (m, 6H, H-3', H-4', H-2'',  $\text{OCH}_2$ , H-3'''), 3.51 (dd,  $J = 5.3, 3.0$  Hz, 1H, H-2), 3.47 (t,  $J = 9.6$  Hz, 1H, H-4'''), 2.89 (t,  $J = 7.5$  Hz, 2H,  $\text{NCH}_2$ ), 1.93 (s, 3H,  $\text{NHC}=\text{OCH}_3$ ), 1.92 (s, 3H,  $\text{NHC}=\text{OCH}_3$ ), 1.62–1.52 (m, 4H, 2 X  $\text{CH}_2$ ), 1.39–1.31 (m, 2H,  $\text{CH}_2$ );  $^{13}\text{C}$  NMR (100 MHz,  $\text{D}_2\text{O}$ ):  $\delta$  175.0 (C-6 and C-6''), 174.4 ( $\text{NHC}=\text{O}$ ), 174.4 ( $\text{NHC}=\text{O}$ ), 101.9 (C-1'''), 100.8 (C-1), 94.5 (C-1'), 94.3 (C-1'''), 76.7 (C-4'), 74.02 (C-4 or C-4''), 73.99 (C-4 or C-4''), 71.0 (C-3'''), 70.1 (C-5'''), 69.8 (C-3'), 69.42 (C-2''), 69.36 (C-5''), 69.32 (C-2), 69.2 (C-5'), 69.0 (C-4'''), 68.9 (C-3''), 68.8 (C-5), 68.6 (C-3), 68.1 ( $\text{OCH}_2$ ), 66.4 (C-6'''), 66.2 (C-6'), 53.5 (C-2'), 53.4 (C-2'''), 39.3 ( $\text{NCH}_2$ ), 28.0 ( $\text{CH}_2$ ), 26.2 ( $\text{CH}_2$ ), 22.2 ( $\text{CH}_2$ ), 21.91 ( $\text{NHC}=\text{OCH}_3$ ), 21.89 ( $\text{NHC}=\text{OCH}_3$ ); HRMS (ESI-TOF) calcd for  $\text{C}_{33}\text{H}_{54}\text{N}_3\text{O}_{29}\text{S}_2$  [ $\text{M}-4\text{Na}+3\text{H}$ ] $^-$ : 1020.2284; found: 1020.2307.

**38. GlcNAc6S-I doA-GlcNS6S-I doA**

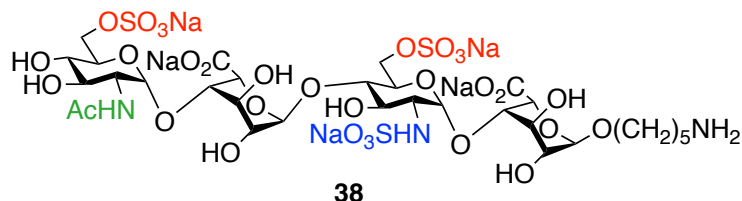

**5-Aminopentanyl 2-deoxy-2-acetamido-6-O-sulfonato- $\alpha$ -D-glucopyranosyl-(1 $\rightarrow$ 4)- $\alpha$ -L-idopyranosyluronate-(1 $\rightarrow$ 4)-2-deoxy-2-sulfamino-6-O-sulfonato- $\alpha$ -D-glucopyranosyl-(1 $\rightarrow$ 4)- $\alpha$ -L-idopyranoside uronate penta sodium salt (38).**

Compound **S43** (29 mg, 0.012 mmol) was subjected to hydrolysis, *N*-sulfation and hydrogenation according to the general procedures to give tetrasaccharide **38** (10 mg, 69% for three steps). <sup>1</sup>H NMR (400 MHz, D<sub>2</sub>O): δ 5.27 (d, *J* = 3.6 Hz, 1H, H-1'), 5.08 (d, *J* = 3.5 Hz, 1H, H-1'''), 4.90 (d, *J* = 3.0 Hz, 1H, H-1''), 4.79 (d, *J* = 2.4 Hz, 1H, H-1), 4.71 (d, *J* = 2.0 Hz, 1H, H-5'''), 4.41 (d, *J* = 2.3 Hz, 1H, H-5), 4.29–4.24 (m, 2H, H-6', H-6'''), 4.13–4.09 (m, 2H, H-6', H-6'''), 4.03 (appt, *J* = 3.8 Hz, 1H, H-3), 4.00 (appt, *J* = 2.9 Hz, 1H, H-4''), 3.96–3.84 (m, 4H, H-4, H-5', H-2''', H-5'''), 3.81 (dd, *J* = 5.5, 3.5 Hz, 1H, H-3''), 3.70–3.52 (m, 7H, OCH<sub>2</sub>, H-4', H-3''', H-3', H-2'', H-2), 3.48 (t, *J* = 9.5 Hz, 1H, H-4'''), 3.17 (dd, *J* = 10.3, 3.5 Hz, 1H, H-2'), 2.90 (t, *J* = 7.5 Hz, 2H, NCH<sub>2</sub>), 1.93 (s, 3H, C=OCH<sub>3</sub>), 1.62–1.52 (m, 4H, 2 X CH<sub>2</sub>), 1.39–1.32 (m, 2H, CH<sub>2</sub>); <sup>13</sup>C NMR (100 MHz, D<sub>2</sub>O): δ 175.3 (C-6), 175.1 (C-6'''), 174.4 (CONH), 101.8 (C-1'''), 100.7 (C-1), 95.6 (C-1'), 94.3 (C-1'''), 76.9 (C-4'), 74.8 (C-4), 74.0 (C-4''), 71.0 (C-3'''), 70.1 (C-5'''), 69.8 (C-3'), 69.3 (C-2''), 69.2 (C-5''), 69.00 (C-4'''), 68.97 (C-5'), 68.9 (C-2), 68.7 (C-3'''), 68.3 (C-5), 68.1 (OCH<sub>2</sub>), 68.0 (C-3), 66.4 (C-6'''), 66.2 (C-6'), 57.8 (C-2'), 53.4 (C-2'''), 39.4 (NCH<sub>2</sub>), 28.0 (CH<sub>2</sub>), 26.3 (CH<sub>2</sub>), 22.2 (CH<sub>2</sub>), 21.9 (NHC=OCH<sub>3</sub>); HRMS (ESI-TOF) calcd for C<sub>31</sub>H<sub>52</sub>N<sub>3</sub>O<sub>31</sub>S<sub>3</sub> [M–5Na+4H]<sup>–</sup>: 1058.1747; found: 1058.1776.

39. GlcNS6S-IdoA-GlcNAc6S-IdoA

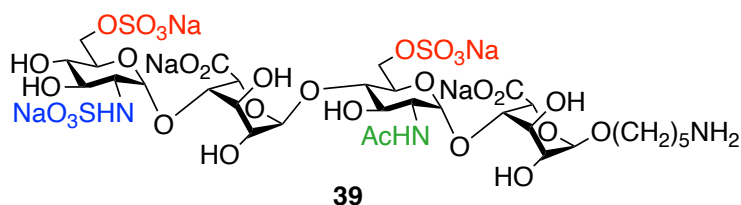

**5-Aminopentanyl 2-deoxy-2-sulfamino-6-O-sulfonato- $\alpha$ -D-glucopyranosyl-(1 $\rightarrow$ 4)- $\alpha$ -L-idopyranosyluronate-(1 $\rightarrow$ 4)-2-deoxy-2-acetamido-6-O-sulfonato- $\alpha$ -D-glucopyranosyl-(1 $\rightarrow$ 4)- $\alpha$ -L-idopyranoside uronate penta sodium salt (39).**

Compound **S12** (41 mg, 0.017 mmol) was subjected to hydrolysis, *N*-acetylation, N<sub>3</sub> to NH<sub>2</sub> conversion, *N*-sulfation and hydrogenation according to the general procedures to obtain **39** (4.5 mg, 22% for five steps). <sup>1</sup>H NMR (400 MHz, D<sub>2</sub>O): δ 5.26 (d, *J* = 3.8 Hz,

1H, H-1'''), 5.07 (d,  $J = 3.8$  Hz, 1H, H-1'), 4.90 (d,  $J = 2.5$  Hz, 1H, H-1''), 4.77 (d,  $J = 2.9$  Hz, 1H, H-1), 4.67 (d,  $J = 2.0$  Hz, 1H, H-5''), 4.42 (d,  $J = 2.9$  Hz, 1H, H-5), 4.29–4.22 (m, 2H, H-6a', H-6a'''), 4.17–4.04 (m, 2H, H-6b', H-6b'''), 4.02 (appt,  $J = 3.9$  Hz, 1H, H-3''), 3.99–3.92 (m, 3H, H-4, H-5', H-4''), 3.91–3.80 (m, 3H, H-3, H-2', H-5'''), 3.71–3.62 (m, 4H, H-3', H-4', H-2'', OCH<sub>2</sub>), 3.58–3.45 (m, 4H, H-2, H-3''', H-4''', OCH<sub>2</sub>), 3.12 (dd,  $J = 10.0$ , 3.6 Hz, 1H, H-2'''), 2.90 (t,  $J = 7.5$  Hz, 2H, NCH<sub>2</sub>), 1.92 (s, 3H, C=OCH<sub>3</sub>), 1.66–1.49 (m, 4H, 2 X CH<sub>2</sub>), 1.41–1.31 (m, 2H, CH<sub>2</sub>); <sup>13</sup>C NMR (100 MHz, D<sub>2</sub>O):  $\delta$  175.3 (C-6''), 175.0 (C-6), 174.3 (CONH), 102.1 (C-1''), 100.8 (C-1), 95.5 (C-1'''), 94.5 (C-1'), 77.4 (C-4'), 74.4 (C-4''), 74.0 (C-4), 71.1 (C-3'''), 69.8 (2C, C-3', C-5'''), 69.4 (C-4'''), 69.2 (C-5'), 69.0 (C-2''), 68.8 (C-2), 68.7 (C-5), 68.6 (2C, C-3, C-5''), 68.1 (OCH<sub>2</sub>), 67.9 (C-3''), 66.4 (C-6'''), 66.2 (C-6'), 57.7 (C-2'''), 53.6 (C-2'), 39.4 (NCH<sub>2</sub>), 28.0 (CH<sub>2</sub>), 26.2 (CH<sub>2</sub>), 22.2 (CH<sub>2</sub>), 21.9 (NHC=OCH<sub>3</sub>); HRMS (ESI-TOF) calcd for C<sub>31</sub>H<sub>51</sub>N<sub>3</sub>O<sub>31</sub>S<sub>3</sub>Na [M–4Na+3H]<sup>–</sup>: 1080.1566; found: 1080.1571.

#### 40. GlcNS6S-IdoA-GlcNS6S-IdoA

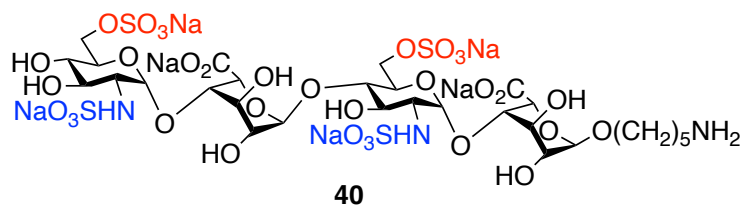

**5-Aminopentanyl 2-deoxy-2-sulfamino-6-O-sulfonato- $\alpha$ -D-glucopyranosyl-(1→4)- $\alpha$ -L-idopyranosyluronate-(1→4)-2-deoxy-2-sulfamino-6-O-sulfonato- $\alpha$ -D-glucopyranosyl-(1→4)- $\alpha$ -L-idopyranoside uronate hexa sodium salt (40).**

Compound **S12** (41 mg, 0.017 mmol) was subjected to hydrolysis, N<sub>3</sub> to NH<sub>2</sub> conversion, N-sulfation and hydrogenation according to the general procedures to obtain **40** (5.2 mg, 25% for four steps). <sup>1</sup>H NMR (400 MHz, D<sub>2</sub>O):  $\delta$  5.28–5.24 (m, 2H, H-1', H-1'''), 4.91 (bs, 1H, H-1''), 4.79 (d,  $J = 2.7$  Hz, 1H, H-1), 4.71 (m, 1H, H-5''), 4.40 (d,  $J = 2.5$  Hz, 1H, H-5), 4.30–4.21 (m, 2H, H-6a', H-6a'''), 4.14–4.04 (m, 2H, H-6b', H-6b'''), 4.04–4.00 (m, 2H, H-3, H-3''), 3.99–3.89 (m, 3H, H-4, H-5', H-4''), 3.87–3.82 (m, 1H, H-5'''), 3.73–3.42 (m,



8H, H-2, H-3', H-4', H-2'', H-3''', H-4''', OCH<sub>2</sub>), 3.20–3.07 (m, 2H, H-2', H-2'''), 2.90 (t, *J* = 7.5 Hz, 2H, NCH<sub>2</sub>), 1.92 (s, 3H, C=OCH<sub>3</sub>), 1.65–1.49 (m, 4H, 2 X CH<sub>2</sub>), 1.41–1.31 (m, 2H, CH<sub>2</sub>); <sup>13</sup>C NMR (100 MHz, D<sub>2</sub>O): δ 175.2 (2C, C-6, C-6''), 102.0 (C-1''), 100.7 (C-1), 95.6 (C-1' or C-1'''), 95.5 (C-1' or C-1'''), 77.5 (C-4'), 74.9 (C-4 or C-4''), 74.3 (C-4 or C-4''), 71.1 (C-3'''), 69.85 (C-5'''), 69.81 (C-3'), 69.01 (C-4'''), 68.97 (C-5'), 68.95 (C-2), 68.54 (C-2''), 68.51 (C-5''), 68.4 (C-5), 68.2 (C-3, or C-3'''), 68.0 (C-3, or C-3'''), 67.7 (OCH<sub>2</sub>), 66.4 (C-6' or C-6'''), 66.2 (C-6' or C-6'''), 57.9 (C-2' or C-2'''), 57.7 (C-2' or C-2'''), 39.4 (NCH<sub>2</sub>), 28.0 (CH<sub>2</sub>), 26.2 (CH<sub>2</sub>), 22.2 (CH<sub>2</sub>), 21.9 (NHC=OCH<sub>3</sub>); HRMS (ESI-TOF) calcd for C<sub>29</sub>H<sub>49</sub>N<sub>3</sub>O<sub>33</sub>S<sub>4</sub>Na [M–5Na+4H]<sup>+</sup>: 1118.1029; found: 1118.1029.

41. GlcNAc6S-IdoA2S-GlcNAc-IdoA

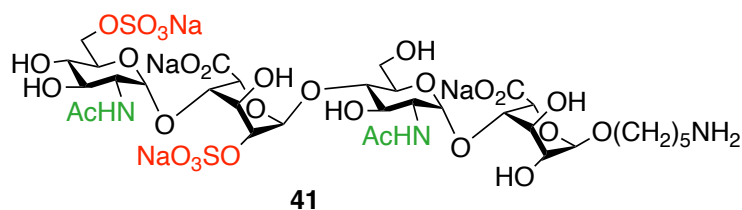

**5-Aminopentanyl 2-deoxy-2-acetamido-6-O-sulfonato- $\alpha$ -D-glucopyranosyl-(1 $\rightarrow$ 4)-2-O-sulfonato- $\alpha$ -L-idopyranosyluronate-(1 $\rightarrow$ 4)-2-deoxy-2-acetamido- $\alpha$ -D-glucopyranosyl-(1 $\rightarrow$ 4)- $\alpha$ -L-idopyranoside uronate tetra sodium salt (41).**

Compound **S43** (29 mg, 0.012 mmol) was subjected to hydrolysis, *N*-acetylation and hydrogenation according to the general procedures to give tetrasaccharide **41** (10 mg, 76% for three steps). <sup>1</sup>H NMR (400 MHz, D<sub>2</sub>O): δ 5.09 (s, 1H, H-1''), 5.06 (d, *J* = 3.7 Hz, 1H, H-1'), 5.01 (d, *J* = 3.5 Hz, 1H, H-1'''), 4.81 (d, *J* = 2.8 Hz, 1H, H-5''), 4.76 (d, *J* = 1.7 Hz, 1H, H-1), 4.41 (d, *J* = 2.7 Hz, 1H, H-5), 4.24 (dd, *J* = 11.1, 3.0 Hz, 1H, H-6'''), 4.23 (s, 1H, H-2''), 4.19 (s, 1H, H-3''), 4.14 (dd, *J* = 11.1, 1.6 Hz, 1H, H-6'''), 3.96–3.73 (m, 9H, H-4, H-4'', H-2''', H-2', H-5''', H-3, H-5', H-6'), 3.72–3.48 (m, 6H, OCH<sub>2</sub>, H-3''', H-3', H-4', H-2), 3.46 (t, *J* = 9.7 Hz, 1H, H-4'''), 2.89 (t, *J* = 7.5 Hz, 2H, NCH<sub>2</sub>), 1.97 (s, 3H, NHC=OCH<sub>3</sub>), 1.92 (s, 3H, NHC=OCH<sub>3</sub>), 1.63–1.52 (m, 4H, 2 X CH<sub>2</sub>), 1.39–1.32 (m, 2H, CH<sub>2</sub>); <sup>13</sup>C NMR

(100 MHz, D<sub>2</sub>O):  $\delta$  175.7 (C-6), 174.9 (C-6''), 174.8 (NHC=O), 174.3 (NHC=O), 100.8 (C-1), 99.2 (C-1''), 94.5 (C-1'), 93.6 (C-1'''), 77.1 (C-4'), 74.0 (C-4), 73.3 (C-2''), 71.3 (C-5'), 71.2 (C-3'''), 70.5 (C-4''), 70.0 (C-5'''), 69.6 (C-3'), 69.5 (C-2), 69.2 (C-4'''), 69.0 (C-5), 68.8 (C-3), 68.1 (OCH<sub>2</sub>), 67.3 (C-5''), 66.5 (C-6'''), 63.3 (C-3''), 59.6 (C-6'), 53.9 (C-2'''), 53.2 (C-2'), 39.4 (NCH<sub>2</sub>), 28.0 (CH<sub>2</sub>), 26.3 (CH<sub>2</sub>), 22.2 (CH<sub>2</sub>, NHC=OCH<sub>3</sub>), 21.9 (NHC=OCH<sub>3</sub>); HRMS (ESI-TOF) calcd for C<sub>33</sub>H<sub>54</sub>N<sub>3</sub>O<sub>29</sub>S<sub>2</sub> [M-4Na+3H]<sup>-</sup>: 1020.2284; found: 1020.2276.

42. GlcNAc6S-IdoA2S-GlcNS-IdoA

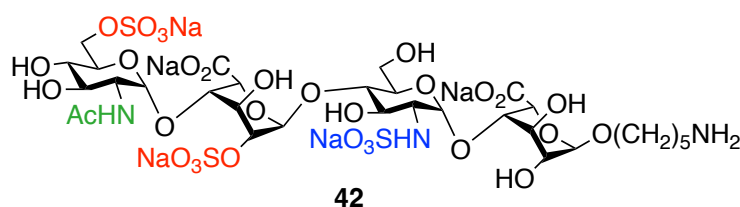

**5-Aminopentanyl 2-deoxy-2-acetamido-6-O-sulfonato- $\alpha$ -D-glucopyranosyl-(1 $\rightarrow$ 4)- $\alpha$ -L-2-O-sulfonato-idopyranosyluronate-(1 $\rightarrow$ 4)-2-deoxy-2-sulfamino- $\alpha$ -D-glucopyranosyl-(1 $\rightarrow$ 4)- $\alpha$ -L-idopyranoside uronate penta sodium salt (42).**

Method 1: Compound **S43** (16 mg, 0.0067 mmol) was subjected to hydrolysis, *N*-sulfation and hydrogenation according to the general procedures to give tetrasaccharide **42** (4.7 mg, 64% for three steps).

Method 2: Compound **S43** (15 mg, 0.0063 mmol) was subjected to hydrolysis, *N*-sulfation and hydrogenation according to the general procedures to give tetrasaccharide **42** (4.3 mg, 62% for three steps).

<sup>1</sup>H NMR (400 MHz, D<sub>2</sub>O):  $\delta$  5.26 (d, *J* = 3.7 Hz, 1H, H-1'), 5.09 (s, 1H, H-1''), 5.02 (d, *J* = 3.5 Hz, 1H, H-1'''), 4.85 (d, *J* = 1.8 Hz, 1H, H-5''), 4.78 (d, *J* = 2.7 Hz, 1H, H-1), 4.40 (d, *J* = 2.5 Hz, 1H, H-5), 4.26 (dd, *J* = 11.0, 3.1 Hz, 1H, H-6'''), 4.22 (appt, *J* = 1.0 Hz, 1H, H-2''), 4.19 (appt, *J* = 2.0 Hz, 1H, H-3''), 4.14 (dd, *J* = 11.0, 1.5 Hz, 1H, H-6'''), 4.03 (t, *J* = 4.3 Hz, 1H, H-3), 3.95–3.85 (m, 4H, H-4, H-4'', H-2''', H-5'''), 3.78–3.73 (m, 3H, H-5', H-6'), 3.70–3.53 (m, 6H, OCH<sub>2</sub>, H-3''', H-3', H-4', H-2), 3.47 (t, *J* = 9.7 Hz, 1H, H-4'''), 3.13 (dd, *J* = 9.8, 3.5 Hz, 1H, H-2'), 2.90 (t, *J* = 7.5 Hz, 2H, NCH<sub>2</sub>), 1.97 (s, 3H, NHC=OCH<sub>3</sub>),

1.63–1.52 (m, 4H, 2 X CH<sub>2</sub>), 1.39–1.32 (m, 2H, CH<sub>2</sub>); <sup>13</sup>C NMR (100 MHz, D<sub>2</sub>O): δ 175.3 (C-6), 174.9 (C-6''), 174.3 (NHC=O), 101.4 (C-1''), 100.7 (C-1), 95.7 (C-1'), 94.3 (C-1'''), 76.8 (C-4'), 74.9 (C-4), 73.3 (C-2''), 71.3 (C-3'''), 71.0 (C-5'), 70.4 (C-4''), 70.0 (C-5'''), 69.6 (C-3'), 69.15 (C-2), 69.13 (C-4'''), 68.6 (C-5), 68.4 (C-3), 68.0 (OCH<sub>2</sub>), 67.3 (C-5''), 66.4 (C-6'''), 63.2 (C-3''), 59.7 (C-6'), 58.1 (C-2'), 53.2 (C-2'''), 39.3 (NCH<sub>2</sub>), 27.9 (CH<sub>2</sub>), 26.2 (CH<sub>2</sub>), 22.22 (CH<sub>2</sub>), 22.19 (NHC=OCH<sub>3</sub>); HRMS (ESI-TOF) calcd for C<sub>31</sub>H<sub>48</sub>N<sub>3</sub>O<sub>31</sub>S<sub>3</sub>Na<sub>4</sub> [M–Na]<sup>−</sup>: 1146.1025; found: 1146.1024.

43. GlcNS6S-IdoA2S-GlcNAc-IdoA

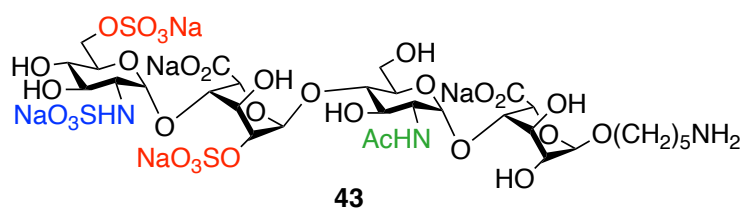

**5-Aminopentanyl 2-deoxy-2-sulfamino-6-O-sulfonato- $\alpha$ -D-glucopyranosyl-(1 $\rightarrow$ 4)-2-O-sulfonato- $\alpha$ -L-idopyranosyluronate-(1 $\rightarrow$ 4)-2-deoxy-2-acetamido- $\alpha$ -D-glucopyranosyl-(1 $\rightarrow$ 4)- $\alpha$ -L-idopyranoside uronate penta sodium salt (43).**

Compound **S22** (40 mg, 0.017 mmol) was subjected to hydrolysis, *N*-acetylation, N<sub>3</sub> to NH<sub>2</sub> conversion, *N*-sulfation and hydrogenation according to the general procedures to obtain **43** (8.9 mg, 46% for five steps). <sup>1</sup>H NMR (400 MHz, D<sub>2</sub>O): δ 5.24 (d, *J* = 3.5 Hz, 1H, H-1'''), 5.14 (d, *J* = 2.2 Hz, 1H, H-1''), 5.06 (d, *J* = 3.7 Hz, 1H, H-1'), 4.76 (d, *J* = 3.3 Hz, 1H, H-1), 4.73 (d, *J* = 2.2 Hz, 1H, H-5''), 4.41 (d, *J* = 3.1 Hz, 1H, H-5), 4.29–4.22 (m, 2H, H-2'', H-6a'''), 4.15–4.07 (m, 2H, H-3'', H-6b'''), 3.96 (appt, *J* = 3.0 Hz, 1H, H-4''), 3.94 (appt, *J* = 3.3 Hz, 1H, H-4), 3.89–3.73 (m, 6H, H-3, H-2', H-5', H-6a', H-6b', H-5'''), 3.70–3.61 (m, 3H, H-3', H-4', OCH<sub>2</sub>), 3.59–3.52 (m, 2H, H-3''', OCH<sub>2</sub>), 3.51–3.42 (m, 2H, H-2, H-4'''), 3.15 (dd, *J* = 10.7, 3.6 Hz, 1H, H-2'''), 2.90 (t, *J* = 7.5 Hz, 2H, NCH<sub>2</sub>), 1.92 (s, 3H, C=OCH<sub>3</sub>), 1.64–1.51 (m, 4H, 2 X CH<sub>2</sub>), 1.40–1.30 (m, 2H, CH<sub>2</sub>); <sup>13</sup>C NMR (100 MHz, D<sub>2</sub>O): δ 175.1 (C-6''), 174.9 (C-6), 174.3 (CONH), 100.8 (C-1), 99.2 (C-1''), 97.1 (C-1'''), 94.6 (C-1'), 76.9 (C-4'), 75.6 (C-4''), 75.0 (C-2''), 74.1 (C-4), 71.3 (C-5'), 70.9 (C-3'''), 69.9

(C-5'''), 69.62 (C-3'), 69.58 (C-2), 69.1 (C-4'''), 69.07 (C-5), 68.9 (C-3), 68.4 (C-5''), 68.1 (C-3''), 68.0 (OCH<sub>2</sub>), 66.3 (C-6'''), 59.6 (C-6'), 58.0 (C-2'''), 53.8 (C-2'), 39.4 (NCH<sub>2</sub>), 28.0 (CH<sub>2</sub>), 26.2 (CH<sub>2</sub>), 22.2 (CH<sub>2</sub>), 21.9 (NHC=OCH<sub>3</sub>); HRMS (ESI-TOF) calcd for C<sub>31</sub>H<sub>51</sub>N<sub>3</sub>O<sub>31</sub>S<sub>3</sub>Na [M-4Na+3H]<sup>-</sup>: 1080.1566; found: 1080.1558.

#### 44. GlcNS6S-IdoA2S-GlcNS-IdoA

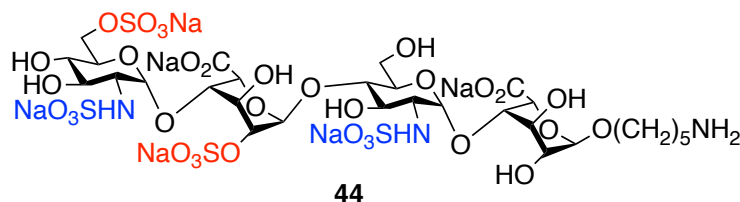

#### **5-Aminopentanyl 2-deoxy-2-sulfamino-6-O-sulfonato- $\alpha$ -D-glucopyranosyl-(1 $\rightarrow$ 4)-2-O-sulfonato- $\alpha$ -L-idopyranosyluronate-(1 $\rightarrow$ 4)-2-deoxy-2-sulfamino- $\alpha$ -D-glucopyranosyl-(1 $\rightarrow$ 4)- $\alpha$ -L-idopyranoside uronate hexa sodium salt (**44**).**

Compound **S22** (40 mg, 0.017 mmol) was subjected to hydrolysis, N<sub>3</sub> to NH<sub>2</sub> conversion, N-sulfation and hydrogenation according to the general procedures to obtain **44** (11 mg, 50% for four steps). <sup>1</sup>H NMR (400 MHz, D<sub>2</sub>O):  $\delta$  5.26 (d, *J* = 3.5 Hz, 1H, H-1'''), 5.23 (d, *J* = 3.5 Hz, 1H, H-1'), 5.15 (d, *J* = 2.0 Hz, 1H, H-1''), 4.80–4.76 (m, 2H, H-1, H-5''), 4.40 (d, *J* = 2.7 Hz, 1H, H-5), 4.28 (dd, *J* = 2.3, 11.1 Hz, 1H, H-6a'''), 4.24 (dd, *J* = 2.0, 4.0 Hz, 1H, H-2''), 4.14 (appt, *J* = 3.8 Hz, 1H, H-3''), 4.10 (dd, *J* = 2.0, 11.1 Hz, 1H, H-6b'''), 4.02 (appt, *J* = 4.0 Hz, 1H, H-3), 3.96 (appt, *J* = 3.8 Hz, 1H, H-4''), 3.94 (appt, *J* = 4.0 Hz, 1H, H-4), 3.89–3.84 (m, 1H, H-5'''), 3.80–3.71 (m, 3H, H-4', H-6a', H-6b'), 3.70–3.52 (m, 6H, H-2, H-3', H-5', H-3''', OCH<sub>2</sub>), 3.48 (appt, *J* = 9.4 Hz, 1H, H-4'''), 3.18–3.10 (m, 2H, H-2', H-2'''), 2.90 (t, *J* = 7.4 Hz, 2H, NCH<sub>2</sub>), 1.92 (s, 3H, C=OCH<sub>3</sub>), 1.64–1.51 (m, 4H, 2 X CH<sub>2</sub>), 1.40–1.30 (m, 2H, CH<sub>2</sub>); <sup>13</sup>C NMR (100 MHz, D<sub>2</sub>O):  $\delta$  175.17 (C-6 or C-6''), 175.11 (C-6 or C-6''), 100.7 (C-1), 99.0 (C-1''), 97.3 (C-1'), 95.7 (C-1'''), 77.0 (C-3'''), 75.6 (C-4''), 75.0 (C-4), 74.6 (C-2''), 71.0 (C-4'), 70.9 (C-5'), 69.9 (C-5'''), 69.62 (C-3'), 69.1 (C-4'''), 68.5 (C-5), 68.3 (C-3), 68.2 (C-5''), 68.1 (OCH<sub>2</sub>), 67.7 (C-3''), 66.3 (C-6'''), 59.6 (C-6'), 53.8 (C-2' and

C-2'''), 39.4 (NCH<sub>2</sub>), 28.0 (CH<sub>2</sub>), 26.2 (CH<sub>2</sub>), 22.2 (CH<sub>2</sub>), 21.9 (NHC=OCH<sub>3</sub>); HRMS (ESI-TOF) calcd for C<sub>29</sub>H<sub>48</sub>N<sub>3</sub>O<sub>33</sub>S<sub>4</sub>Na<sub>2</sub> [M – 4Na + 3H]<sup>-</sup>: 1140.0848; found: 1140.0850.

45. GlcNAc-IdoA2S-GlcNAc6S-IdoA2S

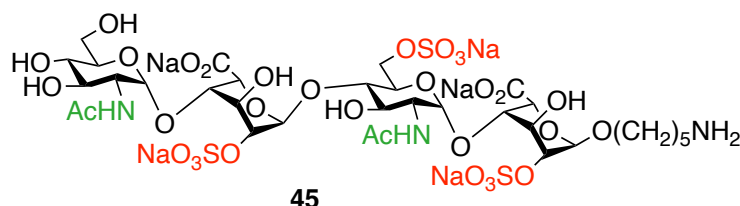

**5-Aminopentanyl 2-deoxy-2-acetamido- $\alpha$ -D-glucopyranosyl-(1 $\rightarrow$ 4)-2-O-sulfonato- $\alpha$ -L-idopyranosyluronate-(1 $\rightarrow$ 4)-2-deoxy-2-acetamido-6-O-sulfonato- $\alpha$ -D-glucopyranosyl-(1 $\rightarrow$ 4)-2-O-sulfonato- $\alpha$ -L-idopyranoside uronate penta sodium salt (45).**

Compound **S29** (24 mg, 0.0095 mmol) was subjected to hydrolysis, *N*-acetylation and hydrogenation according to the general procedures to give tetrasaccharide **45** (7.1 mg, 56% for three steps). <sup>1</sup>H NMR (400 MHz, D<sub>2</sub>O):  $\delta$  5.08 (s, 1H, H-1'''), 5.05 (d, *J* = 3.5 Hz, 1H, H-1'''), 5.02 (d, *J* = 3.6 Hz, 1H, H-1'), 5.00 (s, 1H, H-1), 4.81 (d, *J* = 2.1 Hz, 1H, H-5''), 4.47 (d, *J* = 2.0 Hz, 1H, H-5), 4.25–4.21 (m, 4H, H-2'', H-3'', H-6'), 4.18 (t, *J* = 2.1 Hz, 1H, H-3), 4.12 (br, 1H, H-2), 3.95–3.92 (m, 4H, H-4'', H-4, H-5', H-2'), 3.87 (dd, *J* = 10.5, 3.5 Hz, 1H, H-2'''), 3.78–3.54 (m, 8H, H-6''', H-5''', H-3', H-3''', H-4', OCH<sub>2</sub>), 3.36 (t, *J* = 9.5 Hz, 1H, H-4'''), 2.90 (t, *J* = 7.5 Hz, 2H, NCH<sub>2</sub>), 1.963 (s, 3H, NHC=OCH<sub>3</sub>), 1.957 (s, 3H, NHC=OCH<sub>3</sub>), 1.62–1.52 (m, 4H, 2 X CH<sub>2</sub>), 1.39–1.31 (m, 2H, CH<sub>2</sub>); <sup>13</sup>C NMR (100 MHz, D<sub>2</sub>O):  $\delta$  175.6 (C-6''), 175.2 (C-6), 174.8 (NHC=O), 174.7 (NHC=O), 99.2 (C-1''), 98.5 (C-1), 94.5 (C-1'''), 93.3 (C-1'), 76.4 (C-4'), 73.9 (C-2), 73.6 (C-2''), 71.9 (C-5'''), 71.3 (C-3'''), 70.7 (C-4''), 70.6 (C-4), 70.0 (C-3'), 69.7 (C-4'''), 69.2 (C-5'), 68.1 (OCH<sub>2</sub>), 67.8 (C-5''), 67.0 (C-5), 66.5 (C-6'), 63.8 (C-3''), 63.7 (C-3), 60.2 (C-6'''), 53.40 (C-2'), 53.36 (C-2'''), 39.4 (NCH<sub>2</sub>), 27.8 (CH<sub>2</sub>), 26.2 (CH<sub>2</sub>), 22.2 (2 X NHC=OCH<sub>3</sub>, CH<sub>2</sub>); HRMS (ESI-TOF) calcd for C<sub>33</sub>H<sub>54</sub>N<sub>3</sub>O<sub>32</sub>S<sub>3</sub> [M–5Na+4H]<sup>-</sup>: 1100.1853; found: 1100.1848.

46. GlcNAc-IdoA2S-GlcNS6S-IdoA2S

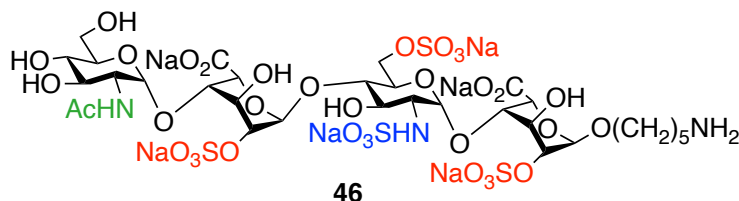

**5-Aminopentanyl 2-deoxy-2-acetamido- $\alpha$ -D-glucopyranosyl-(1 $\rightarrow$ 4)-2-O-sulfonato- $\alpha$ -L-idopyranosyluronate-(1 $\rightarrow$ 4)-2-deoxy-2-sulfamino-6-O-sulfonato- $\alpha$ -D-glucopyranosyl-(1 $\rightarrow$ 4)-2-O-sulfonato- $\alpha$ -L-idopyranoside uronate hexa sodium salt (46).**

Compound **S29** (32 mg, 0.013 mmol) was subjected to hydrolysis, *N*-acetylation and hydrogenation according to the general procedures to give tetrasaccharide **46** (12 mg, 74% for three steps).  $^1\text{H}$  NMR (400 MHz,  $\text{D}_2\text{O}$ ):  $\delta$  5.30 (d,  $J = 3.3$  Hz, 1H, H-1'), 5.11 (s, 1H, H-1''), 5.07 (d,  $J = 3.5$  Hz, 1H, H-1'''), 5.04 (d,  $J = 1.9$  Hz, 1H, H-1), 4.87 (d,  $J = 1.9$  Hz, 1H, H-5''), 4.42 (d,  $J = 2.6$  Hz, 1H, H-5), 4.25–4.20 (m, 4H, H-2'', H-3'', H-6'), 4.14–4.12 (m, 2H, H-2, H-3), 3.94–3.92 (m, 3H, H-4'', H-4, H-5'), 3.88 (dd,  $J = 10.5, 3.3$  Hz, 1H, H-2'''), 3.79–3.55 (m, 8H, H-6''', H-5''', H-3', H-3''', H-4',  $\text{OCH}_2$ ), 3.37 (t,  $J = 9.6$  Hz, 1H, H-4'''), 3.19 (dd,  $J = 10.4, 3.5$  Hz, 1H, H-2'), 2.91 (t,  $J = 7.5$  Hz, 2H,  $\text{NCH}_2$ ), 1.97 (s, 3H,  $\text{NHC}=\text{OCH}_3$ ), 1.62–1.52 (m, 4H, 2 X  $\text{CH}_2$ ), 1.39–1.31 (m, 2H,  $\text{CH}_2$ );  $^{13}\text{C}$  NMR (100 MHz,  $\text{D}_2\text{O}$ ):  $\delta$  175.6 (C-6'''), 174.8 (C-6), 174.7 ( $\text{NHC}=\text{O}$ ), 98.9 (C-1''), 98.8 (C-1), 96.7 (C-1'), 93.5 (C-1'''), 76.2 (C-2), 76.1 (C-4'), 75.7 (C-4), 73.7 (C-2''), 71.9 (C-5'''), 71.3 (C-3'''), 70.7 (C-4''), 69.8 (C-4'''), 69.6 (C-3'), 69.1 (C-5'), 68.7 (C-3), 68.6 (C-5), 68.1 ( $\text{OCH}_2$ ), 67.8 (C-5''), 66.4 (C-6'), 63.9 (C-3''), 60.3 (C-6'''), 58.0 (C-2'), 53.4 (C-2'''), 39.4 ( $\text{NCH}_2$ ), 27.8 ( $\text{CH}_2$ ), 26.2 ( $\text{CH}_2$ ), 22.24 ( $\text{NHC}=\text{OCH}_3$ ), 22.21 ( $\text{CH}_2$ ); HRMS (ESI-TOF) calcd for  $\text{C}_{31}\text{H}_{52}\text{N}_3\text{O}_{34}\text{S}_4$  [ $\text{M}-6\text{Na}+5\text{H}$ ] $^-$ : 1138.1315; found: 1138.1337.

47. GlcNS-IdoA2S-GlcNAc6S-IdoA2S

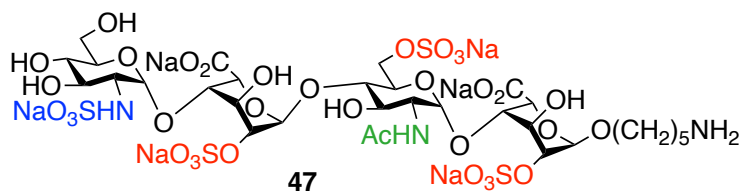

**5-Aminopentanyl 2-deoxy-2-sulfamino- $\alpha$ -D-glucopyranosyl-(1 $\rightarrow$ 4)-2-O-sulfonato- $\alpha$ -L-idopyranosyluronate-(1 $\rightarrow$ 4)-2-deoxy-2-acetamido-6-O-sulfonato- $\alpha$ -D-glucopyranosyl-(1 $\rightarrow$ 4)-2-O-sulfonato- $\alpha$ -L-idopyranoside uronate hexa sodium salt (47).**

Compound **86** (26 mg, 0.012 mmol) was subjected to *N*-acetylation,  $N_3$  to  $NH_2$ , *N*-sulfation and hydrogenation according to the general procedures to give tetrasaccharide **47** (11 mg, 69% for four steps).  $^1H$  NMR (400 MHz,  $D_2O$ ):  $\delta$  5.29 (d,  $J$  = 3.4 Hz, 1H, H-1'''), 5.12 (d,  $J$  = 2.4 Hz, 1H, H-1''), 5.03 (d,  $J$  = 3.7 Hz, 1H, H-1'), 5.01 (s, 1H, H-1), 4.73 (d,  $J$  = 2.6 Hz, 1H, H-5''), 4.48 (d,  $J$  = 2.2 Hz, 1H, H-5), 4.30 (dd,  $J$  = 11.4, 3.2 Hz, 1H, H-6'), 4.26 (dd,  $J$  = 5.2, 2.5 Hz, 1H, H-2''), 4.22–4.11 (m, 4H, H-6', H-3'', H-2, H-3), 4.00 (t,  $J$  = 3.0 Hz, 1H, H-4''), 3.96–3.91 (m, 1H, H-5', H-2', H-4), 3.76–3.61 (m, 6H, H-5''', H-6''', H-4',  $OCH_2$ , H-3'), 3.60–3.53 (m, 2H,  $OCH_2$ , H-3'''), 3.36 (t,  $J$  = 9.5 Hz, 1H, H-4'''), 3.12 (dd,  $J$  = 10.4, 3.5 Hz, 1H, H-2'''), 2.91 (t,  $J$  = 7.5 Hz, 2H,  $NCH_2$ ), 1.96 (s, 3H,  $NHC=OCH_3$ ), 1.62–1.52 (m, 4H, 2 X  $CH_2$ ), 1.39–1.31 (m, 2H,  $CH_2$ );  $^{13}C$  NMR (100 MHz,  $D_2O$ ):  $\delta$  175.1 (C-6), 174.9 (C-6''), 174.7 ( $NHC=O$ ), 99.3 (C-1''), 98.6 (C-1), 96.9 (C-1'''), 93.4 (C-1'), 76.2 (C-4'), 75.7 (C-4''), 75.5 (C-2''), 73.9 (C-2), 71.7 (C-5'''), 71.0 (C-3'''), 70.8 (C-4), 70.0 (C-3'), 69.9 (C-4'''), 69.3 (C-5'), 68.9 (C-5''), 68.7 (C-3''), 68.1 ( $OCH_2$ ), 67.0 (C-5), 66.5 (C-6'), 63.8 (C-3), 60.3 (C-6'''), 58.1 (C-2'''), 53.3 (C-2'), 39.4 ( $NCH_2$ ), 27.8 ( $CH_2$ ), 26.2 ( $CH_2$ ), 22.3 ( $NHC=OCH_3$ ), 22.2 ( $CH_2$ ); HRMS (ESI-TOF) calcd for  $C_{31}H_{52}N_3O_{34}S_4$  [ $M-6Na+5H$ ] $^-$ : 1138.1292; found: 1138.1337.

**48. GlcNS-IdoA2S-GlcNS6S-IdoA2S**

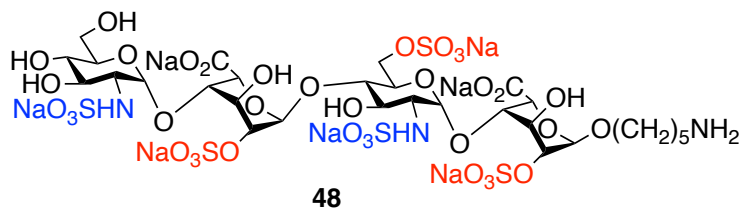

**5-Aminopentanyl 2-deoxy-2-sulfamino- $\alpha$ -D-glucopyranosyl-(1 $\rightarrow$ 4)-2-O-sulfonato- $\alpha$ -L-idopyranosyluronate-(1 $\rightarrow$ 4)-2-deoxy-2-sulfamino-6-O-sulfonato- $\alpha$ -D-glucopyranosyl-(1 $\rightarrow$ 4)-2-O-sulfonato- $\alpha$ -L-idopyranoside uronate hepta sodium salt (48).**

Compound **86** (25 mg, 0.012 mmol) was subjected to  $N_3$  to  $NH_2$ , *N*-sulfation and hydrogenation according to the general procedures to give tetrasaccharide **48** (12 mg, 75% for three steps).  $^1H$  NMR (400 MHz,  $D_2O$ ):  $\delta$  5.32 (d,  $J$  = 3.5 Hz, 1H, H-1'''), 5.30 (d,  $J$  = 3.5 Hz, 1H, H-1'), 5.14 (d,  $J$  = 2.6 Hz, 1H, H-1''), 5.05 (d,  $J$  = 2.0 Hz, 1H, H-1), 4.78 (d,  $J$  = 2.6 Hz, 1H, H-5'''), 4.45 (d,  $J$  = 2.6 Hz, 1H, H-5), 4.32 (dd,  $J$  = 11.4, 2.3 Hz, 1H, H-6'), 4.26 (dd,  $J$  = 5.5, 2.8 Hz, 1H, H-2''), 4.20–4.12 (m, 4H, H-6', H-3'', H-2, H-3), 4.02 (t,  $J$  = 3.0 Hz, 1H, H-4''), 3.99 (t,  $J$  = 3.0 Hz, 1H, H-4), 3.95–3.92 (m, 1H, H-5'), 3.78–3.65 (m, 5H, H-5''', H-6''', H-4',  $OCH_2$ ), 3.62–3.54 (m, 3H,  $OCH_2$ , H-3''', H-3'), 3.37 (t,  $J$  = 9.6 Hz, 1H, H-4'''), 3.20 (dd,  $J$  = 10.4, 3.5 Hz, 1H, H-2'), 3.12 (dd,  $J$  = 10.4, 3.5 Hz, 1H, H-2'''), 2.92 (t,  $J$  = 7.5 Hz, 2H,  $NCH_2$ ), 1.62–1.52 (m, 4H, 2 X  $CH_2$ ), 1.39–1.31 (m, 2H,  $CH_2$ );  $^{13}C$  NMR (100 MHz,  $D_2O$ ):  $\delta$  174.8 (C-6''), 174.5 (C-6), 99.1 (C-1''), 98.9 (C-1), 96.9 (C-1'''), 96.8 (C-1'), 76.1 (C-2), 75.8 (C-4' and C-4''), 75.7 (C-4), 75.6 (C-2''), 71.7 (C-5'''), 71.1 (C-3'''), 69.9 (C-4'''), 69.5 (C-3'), 69.2 (C-5'), 69.1 (C-5''), 68.8 (C-3''), 68.6 (C-3), 68.4 (C-5), 68.1 ( $OCH_2$ ), 66.3 (C-6'), 60.3 (C-6'''), 58.1 (C-2'''), 57.9 (C-2'), 39.4 ( $NCH_2$ ), 27.8 ( $CH_2$ ), 26.2 ( $CH_2$ ), 22.2 ( $CH_2$ ); HRMS (ESI-TOF) calcd for  $C_{29}H_{50}N_3O_{36}S_5$  [ $M-7Na+6H$ ] $^-$ : 1176.0778; found: 1176.0782.

**49. GlcNAc6S-IdoA-GlcNAc6S-IdoA2S**



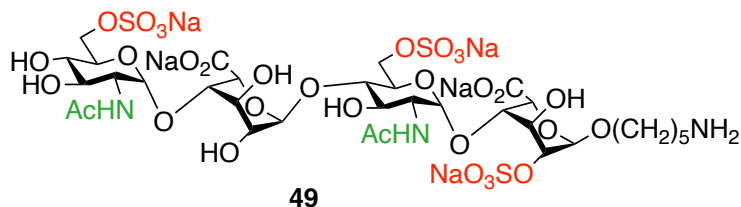

**5-Aminopentanyl 2-deoxy-2-acetamido-6-O-sulfonato- $\alpha$ -D-glucopyranosyl-(1 $\rightarrow$ 4)- $\alpha$ -L-idopyranosyluronate-(1 $\rightarrow$ 4)-2-deoxy-2-acetamido-6-O-sulfonato- $\alpha$ -D-glucopyranosyl-(1 $\rightarrow$ 4)-2-O-sulfonato- $\alpha$ -L-idopyranoside uronate penta sodium salt (49).**

Compound **S27** (13 mg, 0.0054 mmol) was subjected to hydrolysis, *N*-acetylation and hydrogenation according to the general procedures to give tetrasaccharide **49** (4.0 mg, 61% for three steps).  $^1\text{H}$  NMR (400 MHz,  $\text{D}_2\text{O}$ ):  $\delta$  5.08 (d,  $J = 3.5$  Hz, 1H, H-1'''), 5.02 (d,  $J = 3.5$  Hz, 1H, H-1'), 5.02 (s, 1H, H-1), 4.88 (d,  $J = 3.0$  Hz, 1H, H-1''), 4.71 (d,  $J = 2.5$  Hz, 1H, H-5''), 4.47 (d,  $J = 2.0$  Hz, 1H, H-5), 4.28–4.23 (m, 2H, H-6', H-6'''), 4.18–4.09 (m, 4H, H-3, H-6', H-6''', H-2), 4.00–3.93 (m, 4H, H-2', H-4'', H-5', H-4), 3.89–3.85 (m, 5H, H-5''', H-2'''), 3.82 (dd,  $J = 5.8, 3.5$  Hz, 1H, H-3'''), 3.69–3.54 (m, 6H, H-3', H-4', H-2'',  $\text{OCH}_2$ , H-3'''), 3.48 (t,  $J = 9.5$  Hz, 1H, H-4'''), 2.91 (t,  $J = 7.5$  Hz, 2H,  $\text{NCH}_2$ ), 1.97 (s, 3H,  $\text{NHC}=\text{OCH}_3$ ), 1.93 (s, 3H,  $\text{NHC}=\text{OCH}_3$ ), 1.62–1.52 (m, 4H, 2 X  $\text{CH}_2$ ), 1.39–1.31 (m, 2H,  $\text{CH}_2$ );  $^{13}\text{C}$  NMR (100 MHz,  $\text{D}_2\text{O}$ ):  $\delta$  175.1 (C-6) 174.7 (C-6''), 174.4 ( $\text{NHC}=\text{O}$ ), 174.4 ( $\text{NHC}=\text{O}$ ), 101.8 (C-1'''), 98.5 (C-1), 94.4 (C-1'''), 93.8 (C-1'), 76.7 (C-4'), 74.1 (C-4''), 73.9 (C-2), 71.1 (C-4), 71.0 (C-3'''), 70.1 (C-5'''), 70.0 (C-2''), 69.3 (C-3'), 69.2 (C-5''), 69.1 (C-5'), 69.0 (C-4'''), 68.8 (C-3''), 68.1 ( $\text{OCH}_2$ ), 66.9 (C-5), 66.4 (C-6'''), 66.2 (C-6'), 64.0 (C-3), 53.4 (C-2' and C-2'''), 39.4 ( $\text{NCH}_2$ ), 27.8 ( $\text{CH}_2$ ), 26.2 ( $\text{CH}_2$ ), 22.3 ( $\text{NHC}=\text{OCH}_3$ ), 22.2 ( $\text{CH}_2$ ), 21.9 ( $\text{NHC}=\text{OCH}_3$ ); HRMS (ESI-TOF) calcd for  $\text{C}_{33}\text{H}_{54}\text{N}_3\text{O}_{32}\text{S}_3$  [ $\text{M}-5\text{Na}+4\text{H}$ ] $^-$ : 1100.1853; found: 1100.1846.

**50. GlcNAc6S-IdoA-GlcNS6S-IdoA2S**

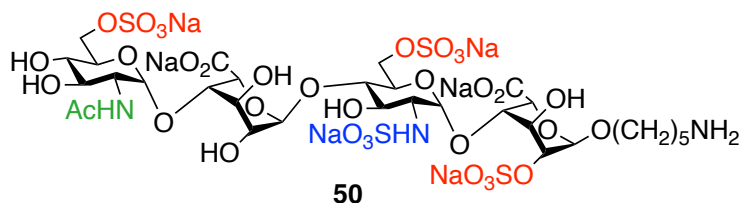

**5-Aminopentanyl 2-deoxy-2-acetamido-6-O-sulfonato- $\alpha$ -D-glucopyranosyl-(1 $\rightarrow$ 4)- $\alpha$ -L-idopyranosyluronate-(1 $\rightarrow$ 4)-2-deoxy-2-sulfamino-6-O-sulfonato- $\alpha$ -D-glucopyranosyl-(1 $\rightarrow$ 4)-2-O-sulfonato- $\alpha$ -L-idopyranoside uronate hexa sodium salt (50).**

Compound **S27** (12 mg, 0.0050 mmol) was subjected to hydrolysis, *N*-sulfation and hydrogenation according to the general procedures to give tetrasaccharide **50** (4.0 mg, 62% for three steps).  $^1\text{H}$  NMR (400 MHz,  $\text{D}_2\text{O}$ ):  $\delta$  5.29 (d,  $J = 3.5$  Hz, 1H, H-1'), 5.08 (d,  $J = 3.5$  Hz, 1H, H-1'''), 5.04 (s, 1H, H-1), 4.90 (d,  $J = 2.8$  Hz, 1H, H-1''), 4.72 (d,  $J = 2.5$  Hz, 1H, H-5''), 4.41 (d,  $J = 2.2$  Hz, 1H, H-5), 4.29–4.24 (m, 2H, H-6', H-6'''), 4.17–4.09 (m, 4H, H-6', H-6''', H-3, H-2), 4.01–3.96 (m, 3H, H-4, H-4'', H-5'), 3.89–3.85 (m, 2H, H-2''', H-5'''), 3.82 (dd,  $J = 5.6, 3.5$  Hz, 1H, H-3''), 3.69–3.54 (m, 6H,  $\text{OCH}_2$ , H-4', H-3''', H-3', H-2''), 3.48 (t,  $J = 9.5$  Hz, 1H, H-4'''), 3.19 (dd,  $J = 10.3, 3.5$  Hz, 1H, H-2'), 2.90 (t,  $J = 7.5$  Hz, 2H,  $\text{NCH}_2$ ), 1.93 (s, 3H,  $\text{C}=\text{OCH}_3$ ), 1.62–1.52 (m, 4H, 2 X  $\text{CH}_2$ ), 1.39–1.32 (m, 2H,  $\text{CH}_2$ );  $^{13}\text{C}$  NMR (100 MHz,  $\text{D}_2\text{O}$ ):  $\delta$  175.1 (C-6'''), 174.8 (C-6), 174.4 (CONH), 101.8 (C-1''), 98.8 (C-1), 96.9 (C-1'), 94.4 (C-1'''), 76.8 (C-4'), 76.0 (C-2), 75.9 (C-4), 74.0 (C-4''), 71.0 (C-3'''), 70.1 (C-5'''), 69.6 (C-3'), 69.3 (C-2''), 69.2 (C-5''), 69.04 (C-5'), 68.99 (C-4'''), 68.7 (C-3''), 68.6 (C-3), 68.4 (C-5), 68.0 ( $\text{OCH}_2$ ), 66.4 (C-6'''), 66.2 (C-6'), 58.0 (C-2'), 53.4 (C-2'''), 39.4 ( $\text{NCH}_2$ ), 27.8 ( $\text{CH}_2$ ), 26.2 ( $\text{CH}_2$ ), 22.2 ( $\text{CH}_2$ ), 21.9 ( $\text{NHC}=\text{OCH}_3$ ); HRMS (ESI-TOF) calcd for  $\text{C}_{31}\text{H}_{52}\text{N}_3\text{O}_{34}\text{S}_4$  [ $\text{M}-6\text{Na}+5\text{H}$ ] $^-$ : 1138.1315; found: 1138.1328.

**51. GlcNS6S-IdoA-GlcNAc6S-IdoA2S**

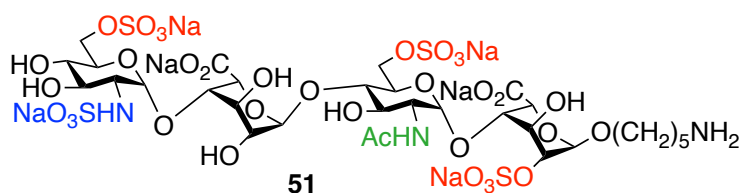

**5-Aminopentanyl 2-deoxy-2-sulfamino-6-O-sulfonato- $\alpha$ -D-glucopyranosyl-(1 $\rightarrow$ 4)- $\alpha$ -L-idopyranosyluronate-(1 $\rightarrow$ 4)-2-deoxy-2-acetamido-6-O-sulfonato- $\alpha$ -D-glucopyranosyl-(1 $\rightarrow$ 4)-2-O-sulfonato- $\alpha$ -L-idopyranoside uronate hexa sodium salt (51).**

Compound **87** (27 mg, 0.013 mmol) was subjected to *N*-acetylation, N<sub>3</sub> to NH<sub>2</sub>, *N*-sulfation and hydrogenation according to the general procedures to give tetrasaccharide **51** (11 mg, 67% for four steps). <sup>1</sup>H NMR (400 MHz, D<sub>2</sub>O):  $\delta$  5.28 (d, *J* = 3.5 Hz, 1H, H-1'''), 5.03 (d, *J* = 3.5 Hz, 1H, H-1'), 5.02 (s, 1H, H-1), 4.91 (d, *J* = 2.0 Hz, 1H, H-1''), 4.77 (d, *J* = 2.3 Hz, 1H, H-5''), 4.49 (d, *J* = 2.0 Hz, 1H, H-5), 4.29–4.23 (m, 2H, H-6', H-6'''), 4.19–4.07 (m, 4H, H-2, H-3, H-6', H-6'''), 4.04 (t, *J* = 3.3 Hz, 1H, H-3''), 4.00–3.93 (m, 4H, H-4, H-4'', H-5', H-2'), 3.84–3.80 (m, 1H, H-5'''), 3.71 (dd, *J* = 4.2, 2.2 Hz, 1H, H-2''), 3.69–3.50 (m, 5H, H-4', OCH<sub>2</sub>, H-3''', H-3'), 3.48 (t, *J* = 9.4 Hz, 1H, H-4'''), 3.14 (dd, *J* = 10.0, 3.5 Hz, 1H, H-2'''), 2.92 (t, *J* = 7.5 Hz, 2H, NCH<sub>2</sub>), 1.98 (s, 3H, NHC=OCH<sub>3</sub>), 1.62–1.52 (m, 4H, 2 X CH<sub>2</sub>), 1.39–1.31 (m, 2H, CH<sub>2</sub>); <sup>13</sup>C NMR (100 MHz, D<sub>2</sub>O):  $\delta$  175.1 (C-6), 175.0 (C-6''), 174.8 (NHC=O), 102.0 (C-1''), 98.5 (C-1), 95.6 (C-1'''), 93.8 (C-1'), 77.3 (C-4'), 74.4 (C-4''), 73.8 (C-2), 71.1 (C-3'''), 71.0 (C-4), 70.0 (C-5'''), 69.6 (C-3'), 69.2 (C-5'), 69.0 (C-4'''), 68.5 (C-2''), 68.3 (C-5''), 68.2 (OCH<sub>2</sub>), 67.7 (C-3''), 66.9 (C-5), 66.4 (C-6'''), 66.2 (C-6'), 63.9 (C-3), 57.7 (C-2'''), 53.4 (C-2'), 39.4 (NCH<sub>2</sub>), 27.8 (CH<sub>2</sub>), 26.3 (CH<sub>2</sub>), 22.3 (NHC=OCH<sub>3</sub>), 22.2 (CH<sub>2</sub>); HRMS (ESI-TOF) calcd for C<sub>31</sub>H<sub>52</sub>N<sub>3</sub>O<sub>34</sub>S<sub>4</sub> [M-6Na+5H]<sup>-</sup>: 1138.1315; found: 1138.1313.

**52. GlcNS6S-IdoA-GlcNS6S-IdoA2S**

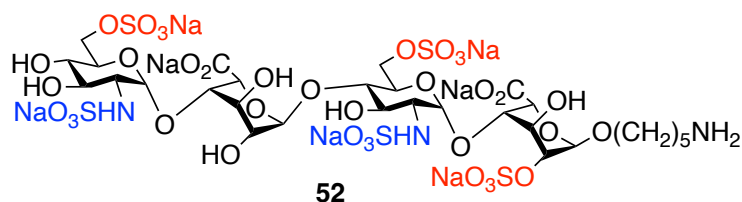

**5-Aminopentanyl 2-deoxy-2-sulfamino-6-O-sulfonato- $\alpha$ -D-glucopyranosyl-(1 $\rightarrow$ 4)- $\alpha$ -L-idopyranosyluronate-(1 $\rightarrow$ 4)-2-deoxy-2-sulfamino-6-O-sulfonato- $\alpha$ -D-**

**glucopyranosyl-(1→4)-2-O-sulfonato- $\alpha$ -L-idopyranoside uronate hexa sodium salt (52).**

Compound **87** (26 mg, 0.013 mmol) was subjected to  $N_3$  to  $NH_2$ , *N*-sulfation and hydrogenation according to the general procedures to give tetrasaccharide **52** (11 mg, 66% for three steps).  $^1H$  NMR (400 MHz,  $D_2O$ ):  $\delta$  5.28 (d,  $J = 3.5$  Hz, 1H, H-1'), 5.26 (d,  $J = 3.5$  Hz, 1H, H-1'''), 5.05 (s, 1H, H-1), 4.93 (s, 1H, H-1''), 4.81 (d,  $J = 2.2$  Hz, 1H, H-5''), 4.44 (d,  $J = 2.4$  Hz, 1H, H-5), 4.29–4.23 (m, 2H, H-6', H-6'''), 4.16–4.07 (m, 4H, H-2, H-3, H-6', H-6'''), 4.04 (t,  $J = 3.7$  Hz, 1H, H-3''), 3.99–3.95 (m, 3H, H-4, H-4'', H-5'), 3.83–3.79 (m, 1H, H-5'''), 3.71 (dd,  $J = 3.5, 1.5$  Hz, 1H, H-2''), 3.68–3.50 (m, 5H, H-4',  $OCH_2$ , H-3'', H-3'), 3.48 (t,  $J = 9.4$  Hz, 1H, H-4'''), 3.18 (dd,  $J = 10.0, 3.5$  Hz, 1H, H-2'), 3.13 (dd,  $J = 10.0, 3.5$  Hz, 1H, H-2'''), 2.91 (t,  $J = 7.5$  Hz, 2H,  $NCH_2$ ), 1.62–1.52 (m, 4H, 2 X  $CH_2$ ), 1.39–1.31 (m, 2H,  $CH_2$ );  $^{13}C$  NMR (100 MHz,  $D_2O$ ):  $\delta$  175.0 (C-6''), 174.0 (C-6), 101.9 (C-1''), 98.8 (C-1), 97.1 (C-1'), 95.7 (C-1'''), 77.5 (C-4'), 75.9 (C-4), 75.8 (C-2), 74.3 (C-4''), 71.1 (C-3'''), 70.0 (C-5'''), 69.6 (C-3'), 69.1 (C-5'), 69.0 (C-4'''), 68.4 (C-3), 68.3 (C-2''), 68.2 (C-5 and C-5''), 68.1 ( $OCH_2$ ), 67.5 (C-3''), 66.4 (C-6'''), 66.3 (C-6'), 58.1 (C-2'), 57.7 (C-2'''), 39.4 ( $NCH_2$ ), 27.8 ( $CH_2$ ), 26.2 ( $CH_2$ ), 22.2 ( $CH_2$ ); HRMS (ESI-TOF) calcd for  $C_{29}H_{50}N_3O_{36}S_5$  [ $M-7Na+6H$ ] $^-$ : 1176.0778; found: 1176.0781.

**53. GlcNAc6S-IdoA2S-GlcNAc-IdoA2S**

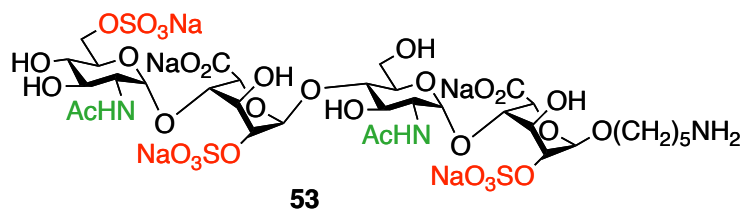

**5-Aminopentanyl 2-deoxy-2-acetamido-6-O-sulfonato- $\alpha$ -D-glucopyranosyl-(1→4)-2-O-sulfonato- $\alpha$ -L-idopyranosyluronate-(1→4)-2-deoxy-2-acetamido- $\alpha$ -D-glucopyranosyl-(1→4)-2-O-sulfonato- $\alpha$ -L-idopyranoside uronate penta sodium salt (53).**

Compound **S37** (29 mg, 0.012 mmol) was subjected to hydrolysis, *N*-acetylation and hydrogenation according to the general procedures to give tetrasaccharide **53** (11 mg, 76% for three steps). <sup>1</sup>H NMR (400 MHz, D<sub>2</sub>O): δ 5.09 (s, 1H, H-1''), 5.03–5.01 (m, 3H, H-1', H-1''', H-1), 4.82 (d, *J* = 1.8 Hz, 1H, H-5''), 4.46 (d, *J* = 2.5 Hz, 1H, H-5), 4.27–4.24 (m, 2H, H-6''', H-2''), 4.29–4.12 (m, 4H, H-3'', H-6'', H-3, H-2), 3.94–3.86 (m, 5H, H-4, H-4'', H-2''', H-2', H-5'''), 3.81–3.75 (m, 3H, H-5', H-6'), 3.69–3.54 (m, 5H, OCH<sub>2</sub>, H-3''', H-3', H-4'), 3.47 (t, *J* = 9.5 Hz, 1H, H-4'''), 2.90 (t, *J* = 7.5 Hz, 2H, NCH<sub>2</sub>), 1.98 (s, 3H, NHC=OCH<sub>3</sub>), 1.63–1.52 (m, 4H, 2 X CH<sub>2</sub>), 1.39–1.32 (m, 2H, CH<sub>2</sub>); <sup>13</sup>C NMR (100 MHz, D<sub>2</sub>O): δ 175.7 (C-6''), 175.2 (C-6), 174.8 (NHC=O), 174.7 (NHC=O), 99.2 (C-1''), 98.5 (C-1), 93.6 (C-1'''), 93.5 (C-1'), 77.2 (C-4'), 74.0 (C-2), 73.2 (C-2''), 71.2 (C-3''', C-5'), 70.7 (C-4), 70.4 (C-4''), 70.0 (C-5'''), 69.8 (C-3'), 69.1 (C-4'''), 68.1 (OCH<sub>2</sub>), 67.3 (C-5''), 67.1 (C-5), 66.4 (C-6'''), 63.9 (C-3), 63.3 (C-3''), 59.7 (C-6'), 53.7 (C-2'), 53.2 (C-2'''), 39.4 (NCH<sub>2</sub>), 27.8 (CH<sub>2</sub>), 26.2 (CH<sub>2</sub>), 22.24 (CH<sub>2</sub>, NHC=OCH<sub>3</sub>), 22.16 (NHC=OCH<sub>3</sub>); HRMS (ESI-TOF) calcd for C<sub>33</sub>H<sub>54</sub>N<sub>3</sub>O<sub>32</sub>S<sub>3</sub> [M–5Na+4H]<sup>–</sup>: 1100.1853; found: 1100.1869.

54. GlcNAc6S-IdoA2S-GlcNS-IdoA2S

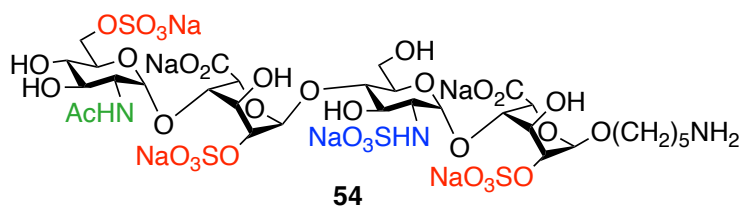

**5-Aminopentanyl 2-deoxy-2-acetamido-6-O-sulfonato- $\alpha$ -D-glucopyranosyl-(1→4)-2-O-sulfonato- $\alpha$ -L-idopyranosyluronate-(1→4)-2-deoxy-2-sulfamino- $\alpha$ -D-glucopyranosyl-(1→4)-2-O-sulfonato- $\alpha$ -L-idopyranoside uronate hexa sodium salt (54).**

Compound **S37** (28 mg, 0.012 mmol) was subjected to hydrolysis, *N*-sulfation and hydrogenation according to the general procedures to give tetrasaccharide **54** (11 mg, 76% for three steps). <sup>1</sup>H NMR (400 MHz, D<sub>2</sub>O): δ 5.29 (d, *J* = 3.5 Hz, 1H, H-1'), 5.10 (s, 1H, H-1''), 5.03 (d, *J* = 2.5 Hz, 1H, H-1), 5.02 (d, *J* = 3.5 Hz, 1H, H-1'''), 4.85 (d, *J* = 1.6

Hz, 1H, H-5''), 4.40 (d,  $J = 2.5$  Hz, 1H, H-5), 4.26 (dd,  $J = 11.1, 3.1$  Hz, 1H, H-6'''), 4.23–4.11 (m, 5H, H-2'', H-3'', H-6''', H-3, H-2), 3.97–3.85 (m, 4H, H-4, H-4'', H-2''', H-5'''), 3.81–3.73 (m, 3H, H-5', H-6'), 3.70–3.54 (m, 5H, OCH<sub>2</sub>, H-3''', H-3', H-4'), 3.47 (t,  $J = 9.6$  Hz, 1H, H-4'''), 3.15 (dd,  $J = 9.6, 3.5$  Hz, 1H, H-2'), 2.90 (t,  $J = 7.5$  Hz, 2H, NCH<sub>2</sub>), 1.98 (s, 3H, NHC=OCH<sub>3</sub>), 1.63–1.52 (m, 4H, 2 X CH<sub>2</sub>), 1.39–1.32 (m, 2H, CH<sub>2</sub>); <sup>13</sup>C NMR (100 MHz, D<sub>2</sub>O):  $\delta$  175.8 (C-6''), 174.81 (C-6), 174.78 (NHC=O), 99.1 (C-1'''), 98.8 (C-1), 96.7 (C-1'), 93.6 (C-1'''), 77.4 (C-4'), 76.2 (C-2), 75.8 (C-4), 73.2 (C-2''), 71.2 (C-3'''), 71.0 (C-5'), 70.5 (C-4''), 70.0 (C-5'''), 69.5 (C-3'), 69.1 (C-4'''), 68.8 (C-3), 68.6 (C-5), 68.0 (OCH<sub>2</sub>), 67.3 (C-5''), 66.4 (C-6'''), 63.3 (C-3''), 59.7 (C-6'), 58.3 (C-2'), 53.2 (C-2'''), 39.4 (NCH<sub>2</sub>), 27.8 (CH<sub>2</sub>), 26.2 (CH<sub>2</sub>), 22.23 (CH<sub>2</sub>), 22.19 (NHC=OCH<sub>3</sub>); HRMS (ESI-TOF) calcd for C<sub>31</sub>H<sub>52</sub>N<sub>3</sub>O<sub>34</sub>S<sub>4</sub> [M–6Na+5H]<sup>–</sup>: 1138.1315; found: 1138.1334.

55. GlcNS6S-IdoA2S-GlcNAc-IdoA2S

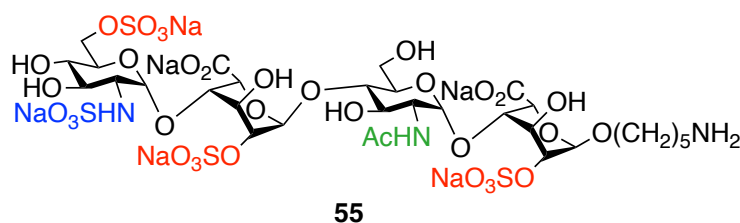

**5-Aminopentanyl 2-deoxy-2-sulfamino-6-O-sulfonato- $\alpha$ -D-glucopyranosyl-(1→4)-2-O-sulfonato- $\alpha$ -L-idopyranosyluronate-(1→4)-2-deoxy-2-acetamido- $\alpha$ -D-glucopyranosyl-(1→4)-2-O-sulfonato- $\alpha$ -L-idopyranoside uronate hexa sodium salt (55).**

Compound **92** (32 mg, 0.014 mmol) was subjected to *N*-acetylation, N<sub>3</sub> to NH<sub>2</sub> conversion, *N*-sulfation and hydrogenation according to the general procedures to obtain **55** (7.0 mg, 51% for four steps). <sup>1</sup>H NMR (400 MHz, D<sub>2</sub>O):  $\delta$  5.22 (d,  $J = 3.5$  Hz, 1H, H-1'''), 5.15 (bs, 1H, H-1''), 5.02 (d,  $J = 3.5$  Hz, 1H, H-1'), 5.00 (bs, 1H, H-1), 4.74–4.68 (m, 1H, H-5''), 4.45 (d,  $J = 2.3$  Hz, 1H, H-5), 4.30–4.23 (m, 1H, H-2'', H-6'''a), 4.19–4.06 (m, 3H, H-2, H-3, H-3'', H-6'''b), 3.97–3.74 (m, 7H, H-4, H-2', H-5', H-6'a, H-6'b, H-4'', H-5'''), 3.70–3.53 (m, 5H,

H-3', H-4', H-3''', OCH<sub>2</sub>), 3.49 (t, *J* = 9.5 Hz, 1H, H-4'''), 3.15 (dd, *J* = 10.4, 3.4 Hz, 1H, H-2'''), 2.91 (t, *J* = 7.7 Hz, 2H, NCH<sub>2</sub>), 1.96 (s, 3H, COCH<sub>3</sub>), 1.65–1.51 (m, 4H, 2 X CH<sub>2</sub>), 1.41–1.33 (m, 2H, CH<sub>2</sub>); <sup>13</sup>C NMR (100 MHz, D<sub>2</sub>O): δ 175.2 (2C, C-6 and C-6''), 174.7 (CONH), 99.2 (C-1'''), 98.6 (C-1), 97.3 (C-1'''), 93.5 (C-1'), 77.0 (C-4'), 75.5 (C-4''), 74.6 (C-2''), 74.0 (C-2), 71.3 (C-5'), 70.9 (C-3'''), 70.8 (C-4), 69.89 (C-3' or C-5'''), 69.84 (C-3' or C-5'''), 69.1 (C-4'''), 68.1 (2C, C-5'' and OCH<sub>2</sub>), 67.6 (C-3'''), 67.1 (C-5), 66.3 (C-6'''), 63.9 (C-3), 59.7 (C-6'), 58.0 (C-2'''), 53.6 (C-2'), 39.4 (NCH<sub>2</sub>), 27.8 (CH<sub>2</sub>), 26.2 (CH<sub>2</sub>), 22.24 (CH<sub>2</sub>), 22.16 (COCH<sub>3</sub>); HRMS (ESI-TOF) calcd for C<sub>31</sub>H<sub>53</sub>N<sub>3</sub>O<sub>34</sub>S<sub>4</sub> [M – 4Na + 2H]<sup>2-</sup>: 568.5618; found: 568.5599.

56. GlcNS6S-IdoA2S-GlcNS-IdoA2S

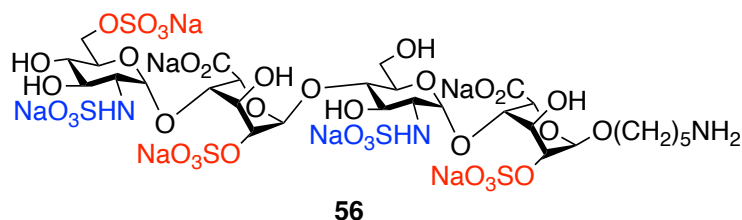

**5-Aminopentanyl 2-deoxy-2-sulfamino-6-O-sulfonato- $\alpha$ -D-glucopyranosyl-(1 $\rightarrow$ 4)-2-O-sulfonato- $\alpha$ -L-idopyranosyluronate-(1 $\rightarrow$ 4)-2-deoxy-2-sulfamino- $\alpha$ -D-glucopyranosyl-(1 $\rightarrow$ 4)-2-O-sulfonato- $\alpha$ -L-idopyranoside uronate hexa sodium salt (56).**

Compound **92** (24 mg, 0.011 mmol) was subjected to N<sub>3</sub> to NH<sub>2</sub> conversion, N-sulfation and hydrogenation according to the general procedures to obtain **56** (6.5 mg, 45% for three steps). <sup>1</sup>H NMR (400 MHz, D<sub>2</sub>O): δ 5.30 (d, *J* = 3.6 Hz, 1H, H-1'), 5.22 (d, *J* = 3.4 Hz, 1H, H-1'''), 5.16 (bs, 1H, H-1''), 5.02 (d, *J* = 2.7 Hz, 1H, H-1), 4.78 (d, *J* = 2.4 Hz, 1H, H-5''), 4.40 (d, *J* = 2.8 Hz, 1H, H-5), 4.30–4.22 (m, 1H, H-2'', H-6'''a), 4.17–4.05 (m, 4H, H-2, H-3, H-3'', H-6'''b), 3.99–3.94 (m, 2H, H-4, H-4''), 3.90–3.83 (m, 1H, H-5''') 3.82–3.74 (m, 3H, H-5', H-6'a, H-6'b), 3.70–3.52 (m, 5H, H-3', H-4', H-3''', OCH<sub>2</sub>), 3.49 (t, *J* = 9.4 Hz, 1H, H-4'''), 3.18–3.12 (m, 2H, H-2', H-2'''), 2.91 (t, *J* = 7.7 Hz, 2H, NCH<sub>2</sub>), 1.66–1.50 (m,

4H, 2 X CH<sub>2</sub>), 1.42–1.32 (m, 2H, CH<sub>2</sub>); <sup>13</sup>C NMR (100 MHz, D<sub>2</sub>O): δ 175.3 (C-6''), 174.7 (C-6), 99.0 (C-1''), 98.9 (C-1), 97.3 (C-1'''), 96.7 (C-1'), 77.2 (C-4'), 76.5 (C-2), 75.8 (C-4), 75.6 (C-4''), 74.5 (C-2''), 71.1 (C-5'), 70.9 (C-3'''), 69.9 (C-5'''), 69.5 (C-3'), 69.1 (C-4'''), 69.0 (C-3''), 68.8 (C-5), 68.08 (C-5''), 68.04 (OCH<sub>2</sub>), 67.6 (C-3), 66.3 (C-6'''), 59.7 (C-6), 58.2 (C-2' or C-2'''), 58.0 (C-2' or C-2'''), 39.4 (NCH<sub>2</sub>), 27.8 (CH<sub>2</sub>), 26.2 (CH<sub>2</sub>), 22.2 (CH<sub>2</sub>); HRMS (ESI-TOF) calcd for C<sub>29</sub>H<sub>50</sub>N<sub>3</sub>O<sub>36</sub>S<sub>5</sub> [M – 7Na + 6H]<sup>-</sup>: 1176.0778; found 1176.0798.

57. GlcNAc6S-IdoA2S-GlcNAc6S-IdoA

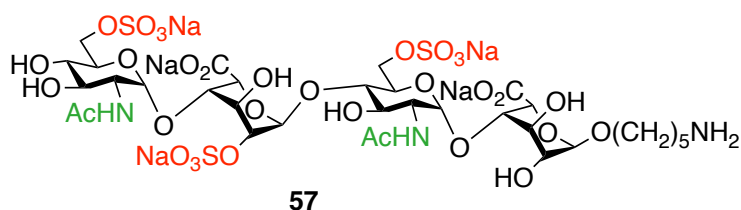

**5-Aminopentanyl 2-deoxy-2-acetamido-6-O-sulfonato- $\alpha$ -D-glucopyranosyl-(1 $\rightarrow$ 4)-2-O-sulfonato- $\alpha$ -L-idopyranosyluronate-(1 $\rightarrow$ 4)-2-deoxy-2-acetamido-6-O-sulfonato- $\alpha$ -D-glucopyranosyl-(1 $\rightarrow$ 4)- $\alpha$ -L-idopyranoside uronate penta sodium salt (57).**

Compound **S37** (38 mg, 0.016 mmol) was subjected to hydrolysis, N<sub>3</sub> to NH<sub>2</sub>, N-acetylation and hydrogenation according to the general procedures to give tetrasaccharide **57** (14 mg, 72% for four steps). <sup>1</sup>H NMR (400 MHz, D<sub>2</sub>O): δ 5.10 (s, 1H, H-1''), 5.08 (d, *J* = 3.6 Hz, 1H, H-1'), 5.07 (d, *J* = 3.5 Hz, 1H, H-1'''), 4.82 (d, *J* = 2.0 Hz, 1H, H-5''), 4.72 (d, *J* = 3.1 Hz, 1H, H-1), 4.43 (d, *J* = 2.8 Hz, 1H, H-5), 4.27–4.14 (m, 6H, H-6', H-6''', H-2'', H-3'''), 3.99–3.88 (m, 6H, H-4, H-4'', H-5', H-2''', H-5''', H-2'), 3.83 (dd, *J* = 5.2, 4.0 Hz, 1H, H-3), 3.72–3.50 (m, 6H, OCH<sub>2</sub>, H-4', H-3''', H-3', H-2), 3.47 (t, *J* = 9.6 Hz, 1H, H-4'''), 2.91 (t, *J* = 7.5 Hz, 2H, NCH<sub>2</sub>), 1.97 (s, 3H, C=OCH<sub>3</sub>), 1.93 (s, 3H, C=OCH<sub>3</sub>), 1.62–1.52 (m, 4H, 2 X CH<sub>2</sub>), 1.39–1.32 (m, 2H, CH<sub>2</sub>); <sup>13</sup>C NMR (100 MHz, D<sub>2</sub>O): δ 175.4 (C-6''), 174.9 (C-6), 174.8 (CONH), 174.3 (CONH), 100.8 (C-1), 99.1 (C-1''), 94.4 (C-1'), 93.6 (C-1'''), 76.1 (C-4'), 74.0 (C-4), 73.9 (C-2''), 71.2 (C-3'''), 70.9 (C-4''),



70.0 (C-5'''), 69.7 (C-3'), 69.5 (C-2), 69.3 (C-5'), 69.2 (C-4'''), 69.0 (C-5), 68.8 (C-3), 68.1 (OCH<sub>2</sub>), 67.8 (C-5''), 66.5 (C-6'''), 66.4 (C-6'), 64.1 (C-3''), 53.6 (C-2'), 53.2 (C-2'''), 39.4 (NCH<sub>2</sub>), 28.0 (CH<sub>2</sub>), 26.2 (CH<sub>2</sub>), 22.22 (NHC=OCH<sub>3</sub>), 22.20 (CH<sub>2</sub>), 21.9 (NHC=OCH<sub>3</sub>); HRMS (ESI-TOF) calcd for C<sub>33</sub>H<sub>54</sub>N<sub>3</sub>O<sub>32</sub>S<sub>3</sub> [M-5Na+4H]<sup>-</sup>: 1100.1853; found: 1100.1857.

58. GlcNAc6S-IdoA2S-GlcNS6S-IdoA

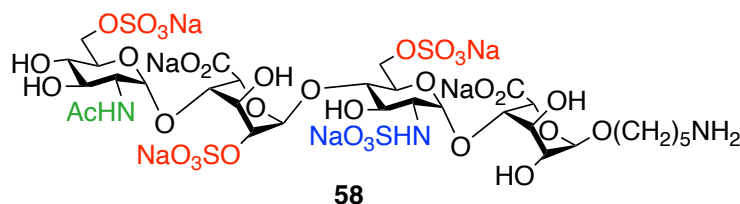

**5-Aminopentanyl 2-deoxy-2-acetamido-6-O-sulfonato- $\alpha$ -D-glucopyranosyl-(1 $\rightarrow$ 4)-2-O-sulfonato- $\alpha$ -L-idopyranosyluronate-(1 $\rightarrow$ 4)-2-deoxy-2-sulfamino-6-O-sulfonato- $\alpha$ -D-glucopyranosyl-(1 $\rightarrow$ 4)- $\alpha$ -L-idopyranoside uronate hexa sodium salt (58).**

Compound **S37** (22 mg, 0.010 mmol) was subjected to hydrolysis, *N*-sulfation, N<sub>3</sub> to NH<sub>2</sub>, *N*-acetylation and hydrogenation according to the general procedures to give tetrasaccharide **58** (6.1 mg, 51% for five steps). <sup>1</sup>H NMR (400 MHz, D<sub>2</sub>O):  $\delta$  5.28 (d, *J* = 3.5 Hz, 1H, H-1'), 5.10 (s, 1H, H-1''), 5.06 (d, *J* = 3.5 Hz, 1H, H-1'''), 4.85 (d, *J* = 2.1 Hz, 1H, H-5''), 4.78 (d, *J* = 2.8 Hz, 1H, H-1), 4.41 (d, *J* = 2.6 Hz, 1H, H-5), 4.29–4.13 (m, 6H, H-6', H-6''', H-2'', H-3''), 4.02 (appt, *J* = 3.9 Hz, 1H, H-3), 3.97–3.96 (m, 2H, H-4, H-4''), 3.92–3.87 (m, 3H, H-5', H-2''', H-5'''), 3.71–3.53 (m, 6H, OCH<sub>2</sub>, H-4', H-3''', H-3', H-2), 3.46 (t, *J* = 9.6 Hz, 1H, H-4'''), 3.17 (dd, *J* = 10.3, 3.6 Hz, 1H, H-2'), 2.89 (t, *J* = 7.5 Hz, 2H, NCH<sub>2</sub>), 1.97 (s, 3H, C=OCH<sub>3</sub>), 1.62–1.52 (m, 4H, 2 X CH<sub>2</sub>), 1.39–1.32 (m, 2H, CH<sub>2</sub>); <sup>13</sup>C NMR (100 MHz, D<sub>2</sub>O):  $\delta$  175.6 (C-6''), 175.1 (C-6), 174.9 (CONH), 100.7 (C-1), 99.0 (C-1''), 95.5 (C-1'), 93.6 (C-1'''), 76.1 (C-4'), 74.9 (C-4), 73.8 (C-2''), 71.2 (C-3'''), 70.8 (C-4''), 70.0 (C-5'''), 69.7 (C-3'), 69.2 (C-2), 69.1 (C-4'''), 69.0 (C-5'), 68.7 (C-5), 68.5 (C-3), 68.0 (OCH<sub>2</sub>), 67.8 (C-5''), 66.4 (C-6''' and C-6'), 64.0 (C-3''), 57.8 (C-2'), 53.2 (C-2'''), 39.4 (NCH<sub>2</sub>), 28.0 (CH<sub>2</sub>), 26.2 (CH<sub>2</sub>), 22.2 (CH<sub>2</sub> and NHC=OCH<sub>3</sub>); HRMS (ESI-TOF) calcd for C<sub>31</sub>H<sub>52</sub>N<sub>3</sub>O<sub>34</sub>S<sub>4</sub> [M-6Na+5H]<sup>-</sup>: 1138.1315; found: 1138.1317.

59. GlcNS6S-IdoA2S-GlcNAc6S-IdoA

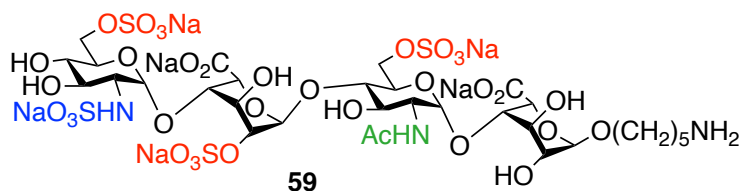

**5-Aminopentanyl 2-deoxy-2-sulfamino-6-O-sulfonato- $\alpha$ -D-glucopyranosyl-(1 $\rightarrow$ 4)-2-O-sulfonato- $\alpha$ -L-idopyranosyluronate-(1 $\rightarrow$ 4)-2-deoxy-6-O-sulfonato- $\alpha$ -D-glucopyranosyl-(1 $\rightarrow$ 4)-2-acetamido- $\alpha$ -L-idopyranoside uronate hexa sodium salt (59).**

Compound **S37** (33 mg, 0.014 mmol) was subjected to hydrolysis, *N*-acetylation,  $N_3$  to  $NH_2$ , *N*-sulfation, and hydrogenation according to the general procedures to give tetrasaccharide **59** (13 mg, 72% for five steps).  $^1H$  NMR (400 MHz,  $D_2O$ ):  $\delta$  5.33 (d,  $J$  = 3.4 Hz, 1H, H-1'''), 5.12 (d,  $J$  = 2.5 Hz, 1H, H-1''), 5.08 (d,  $J$  = 3.7 Hz, 1H, H-1'), 4.76 (d,  $J$  = 3.0 Hz, 1H, H-1), 4.71 (1H, H-5''), 4.43 (d,  $J$  = 2.9 Hz, 1H, H-5), 4.34–4.24 (m, 3H, H-6', H-6''', H-2''), 4.19–4.10 (m, 3H, H-6', H-6''', H-3''), 4.04 (t,  $J$  = 2.9 Hz, 1H, H-4''), 3.97 (t,  $J$  = 3.3 Hz, 1H, H-4), 3.95–3.88 (m, 2H, H-5', H-5''', H-2'), 3.83 (dd,  $J$  = 5.4, 4.1 Hz, 1H, H-3), 3.72–3.65 (m, 3H, H-4', OCH<sub>2</sub>, H-3'), 3.59–3.45 (m, 4H, H-2, OCH<sub>2</sub>, H-3''', H-4'''), 3.15 (dd,  $J$  = 10.2, 3.4 Hz, 1H, H-2'''), 2.90 (t,  $J$  = 7.5 Hz, 2H, NCH<sub>2</sub>), 1.92 (s, 3H, NHC=OCH<sub>3</sub>), 1.62–1.52 (m, 4H, 2 X CH<sub>2</sub>), 1.39–1.31 (m, 2H, CH<sub>2</sub>);  $^{13}C$  NMR (100 MHz,  $D_2O$ ):  $\delta$  174.8 (C-6), 174.7 (C-6''), 174.3 (NHC=O), 100.8 (C-1), 99.3 (C-1''), 96.7 (C-1'''), 94.4 (C-1'), 75.9 (C-2''), 75.8 (C-4'), 75.7 (C-4''), 74.1 (C-4), 70.9 (C-3'''), 69.9 (C-5'''), 69.7 (C-3'), 69.6 (C-2), 69.4 (C-5'), 69.24 (C-5''), 69.16 (C-4'''), 69.13 (C-3''), 69.0 (C-5), 68.9 (C-3), 68.1 (OCH<sub>2</sub>), 66.4 (C-6' and C-6'''), 57.9 (C-2'''), 53.5 (C-2'), 39.4 (NCH<sub>2</sub>), 28.0 (CH<sub>2</sub>), 26.2 (CH<sub>2</sub>), 22.2 (CH<sub>2</sub>), 21.9 (NHC=OCH<sub>3</sub>); HRMS (ESI-TOF) calcd for C<sub>31</sub>H<sub>52</sub>N<sub>3</sub>O<sub>34</sub>S<sub>4</sub> [M–6Na+5H]<sup>–</sup>: 1138.1315; found: 1138.1312.

60. GlcNS6S-IdoA2S-GlcNS6S-IdoA

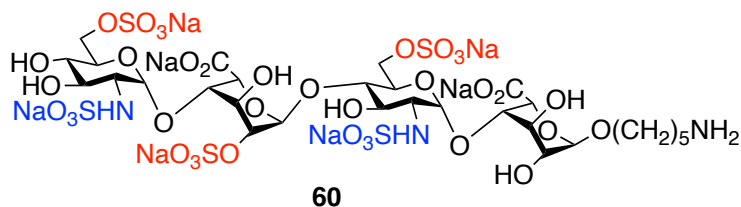

**5-Aminopentanyl 2-deoxy-2-sulfamino-6-O-sulfonato- $\alpha$ -D-glucopyranosyl-(1 $\rightarrow$ 4)-2-O-sulfonato- $\alpha$ -L-idopyranosyluronate-(1 $\rightarrow$ 4)-2-deoxy-6-O-sulfonato- $\alpha$ -D-glucopyranosyl-(1 $\rightarrow$ 4)-2-sulfamino- $\alpha$ -L-idopyranoside uronate hexa sodium salt (60).**

Compound **S37** (14 mg, 0.0063 mmol) was subjected to hydrolysis,  $N_3$  to  $NH_2$ ,  $N$ -sulfation, and hydrogenation according to the general procedures to give tetrasaccharide **60** (5.1 mg, 62% for four steps).  $^1H$  NMR (400 MHz,  $D_2O$ ):  $\delta$  5.32 (d,  $J$  = 3.3 Hz, 1H, H-1'''), 5.27 (d,  $J$  = 3.7 Hz, 1H, H-1'), 5.13 (d,  $J$  = 2.5 Hz, 1H, H-1''), 4.78 (d,  $J$  = 2.7 Hz, 1H, H-1), 4.73 (1H, H-5''), 4.41 (d,  $J$  = 2.5 Hz, 1H, H-5), 4.33–4.23 (m, 3H, H-6', H-6''', H-2''), 4.16–4.10 (m, 3H, H-6', H-6''', H-3''), 4.03–4.00 (m, 2H, H-4'', H-3), 3.96 (t,  $J$  = 3.0 Hz, 1H, H-4), 3.91–3.88 (m, 2H, H-5', H-5'''), 3.70–3.53 (m, 6H, H-4', OCH<sub>2</sub>, H-3', H-2, OCH<sub>2</sub>, H-3'''), 3.47 (t,  $J$  = 9.5 Hz, 1H, H-4'''), 3.17 (dd,  $J$  = 8.0, 3.5 Hz, 1H, H-2'), 3.15 (dd,  $J$  = 8.0, 3.5 Hz, 1H, H-2'''), 2.89 (t,  $J$  = 7.5 Hz, 2H, NCH<sub>2</sub>), 1.62–1.52 (m, 4H, 2 X CH<sub>2</sub>), 1.39–1.31 (m, 2H, CH<sub>2</sub>);  $^{13}C$  NMR (100 MHz,  $D_2O$ ):  $\delta$  175.1 (C-6), 174.8 (C-6''), 100.7 (C-1), 99.2 (C-1''), 96.8 (C-1'''), 95.5 (C-1'), 75.8 (C-4'), 75.7 (C-2'' and C-4''), 74.9 (C-4), 70.9 (C-3'''), 69.9 (C-5'''), 69.7 (C-3'), 69.2 (C-4'''' and C-5''), 69.1 (C-2), 69.0 (C-5'), 68.9 (C-3''), 68.5 (C-5), 68.3 (C-3), 68.1 (OCH<sub>2</sub>), 66.4 (C-6' and C-6'''), 57.9 (C-2'''), 57.7 (C-2'), 39.4 (NCH<sub>2</sub>), 28.0 (CH<sub>2</sub>), 26.3 (CH<sub>2</sub>), 22.2 (CH<sub>2</sub>); HRMS (ESI-TOF) calcd for  $C_{29}H_{50}N_3O_{36}S_5$  [ $M-7Na+6H$ ]<sup>-</sup>: 1176.0778; found: 1176.0786.

**61. GlcNAc6S-IdoA2S-GlcNAc6S-IdoA2S**

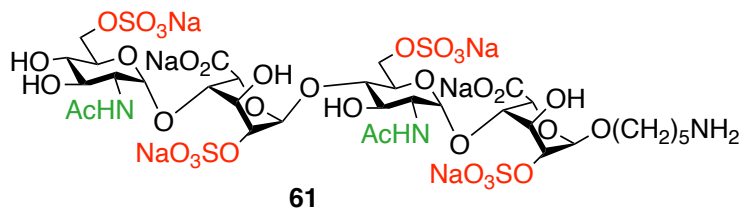

**5-Aminopentanyl 2-deoxy-2-acetamido-6-O-sulfonato- $\alpha$ -D-glucopyranosyl-(1 $\rightarrow$ 4)-2-O-sulfonato- $\alpha$ -L-idopyranosyluronate-(1 $\rightarrow$ 4)-2-deoxy-2-acetamido-6-O-sulfonato- $\alpha$ -D-glucopyranosyl-(1 $\rightarrow$ 4)-2-O-sulfonato- $\alpha$ -L-idopyranoside uronate hexa sodium salt (61).**

Compound **S31** (32 mg, 0.014 mmol) was subjected to hydrolysis, *N*-acetylation and hydrogenation according to the general procedures to give tetrasaccharide **61** (14 mg, 78% for three steps).  $^1\text{H}$  NMR (400 MHz,  $\text{D}_2\text{O}$ ):  $\delta$  5.09 (s, 1H, H-1''), 5.06 (d,  $J$  = 3.4 Hz, 1H, H-1'''), 5.03 (d,  $J$  = 3.7 Hz, 1H, H-1'), 5.01 (s, 1H, H-1), 4.83 (d,  $J$  = 2.0 Hz, 1H, H-5''), 4.48 (d,  $J$  = 2.0 Hz, 1H, H-5), 4.28–4.13 (m, 8H, H-6', H-6''', H-2'', H-3'', H-3, H-2), 3.99–3.88 (m, 6H, H-4, H-4'', H-5', H-2''', H-5''', H-2'), 3.72–3.54 (m, 5H,  $\text{OCH}_2$ , H-4', H-3''', H-3'), 3.47 (t,  $J$  = 9.5 Hz, 1H, H-4'''), 2.92 (t,  $J$  = 7.5 Hz, 2H,  $\text{NCH}_2$ ), 1.98 (s, 3H,  $\text{C}=\text{OCH}_3$ ), 1.97 (s, 3H,  $\text{C}=\text{OCH}_3$ ), 1.62–1.52 (m, 4H, 2 X  $\text{CH}_2$ ), 1.39–1.32 (m, 2H,  $\text{CH}_2$ );  $^{13}\text{C}$  NMR (100 MHz,  $\text{D}_2\text{O}$ ):  $\delta$  175.5 (C-6''), 175.2 (C-6), 174.8 (CONH), 174.7 (CONH), 99.2 (C-1''), 98.5 (C-1), 93.6 (C-1'''), 93.4 (C-1'), 76.4 (C-4'), 73.9 (C-2), 73.7 (C-2''), 71.2 (C-3'''), 70.83 (C-4 or C-4''), 70.75 (C-4 or C-4'''), 70.03 (C-5'''), 69.99 (C-3'), 69.3 (C-5'), 69.1 (C-4'''), 68.1 ( $\text{OCH}_2$ ), 67.7 (C-5''), 67.0 (C-5), 66.5 (C-6''' and C-6'), 63.9 (C-3''), 63.7 (C-3), 53.4 (C-2'), 53.2 (C-2'''), 39.4 ( $\text{NCH}_2$ ), 27.8 ( $\text{CH}_2$ ), 26.2 ( $\text{CH}_2$ ), 22.3 ( $\text{NHC}=\text{OCH}_3$ ), 22.23 ( $\text{NHC}=\text{OCH}_3$ ), 22.20 ( $\text{CH}_2$ ); HRMS (ESI-TOF) calcd for  $\text{C}_{33}\text{H}_{54}\text{N}_3\text{O}_{35}\text{S}_4$  [ $\text{M}-6\text{Na}+5\text{H}$ ] $^-$ : 1180.1421; found: 1180.1426.

62. GlcNAc6S-IdoA2S-GlcNS6S-IdoA2S

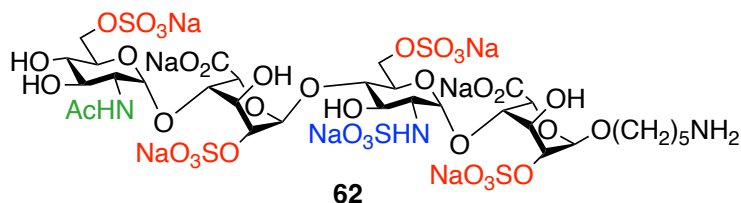

**5-Aminopentanyl 2-deoxy-2-acetamido-6-O-sulfonato- $\alpha$ -D-glucopyranosyl-(1 $\rightarrow$ 4)-2-O-sulfonato- $\alpha$ -L-idopyranosyluronate-(1 $\rightarrow$ 4)-2-deoxy-2-sulfamino-6-O-sulfonato- $\alpha$ -D-glucopyranosyl-(1 $\rightarrow$ 4)-2-O-sulfonato- $\alpha$ -L-idopyranoside uronate hepta sodium salt (**62**).**

Compound **S31** (30 mg, 0.013 mmol) was subjected to hydrolysis, *N*-sulfation and hydrogenation according to the general procedures to give tetrasaccharide **62** (13 mg, 75% for three steps).  $^1\text{H}$  NMR (400 MHz,  $\text{D}_2\text{O}$ ):  $\delta$  5.29 (d,  $J = 3.5$  Hz, 1H, H-1'), 5.11 (s, 1H, H-1''), 5.07 (d,  $J = 3.5$  Hz, 1H, H-1'''), 5.04 (s, 1H, H-1), 4.87 (d,  $J = 2.0$  Hz, 1H, H-5''), 4.42 (d,  $J = 2.5$  Hz, 1H, H-5), 4.27–4.11 (m, 8H, H-6', H-6''', H-2'', H-3'', H-3, H-2), 3.99–3.89 (m, 5H, H-4, H-4'', H-5', H-2''', H-5'''), 3.72–3.55 (m, 5H,  $\text{OCH}_2$ , H-4', H-3''', H-3'), 3.47 (t,  $J = 9.7$  Hz, 1H, H-4'''), 3.19 (dd,  $J = 10.3, 3.5$  Hz, 1H, H-2'), 2.90 (t,  $J = 7.5$  Hz, 2H,  $\text{NCH}_2$ ), 1.97 (s, 3H,  $\text{C}=\text{OCH}_3$ ), 1.62–1.52 (m, 4H, 2 X  $\text{CH}_2$ ), 1.39–1.32 (m, 2H,  $\text{CH}_2$ );  $^{13}\text{C}$  NMR (100 MHz,  $\text{D}_2\text{O}$ ):  $\delta$  175.5 (C-6''), 174.8 (CONH), 174.7 (C-6), 98.9 (C-1'''), 98.8 (C-1), 96.7 (C-1'), 93.6 (C-1'''), 76.1 (C-4' and C-2), 75.7 (C-4), 73.7 (C-2''), 71.2 (C-3'''), 70.9 (C-4''), 70.0 (C-5'''), 69.6 (C-3'), 69.1 (C-4''' and C-5'), 68.6 (C-3), 68.5 (C-5), 68.1 ( $\text{OCH}_2$ ), 67.8 (C-5''), 66.4 (C-6''' or C-6'), 66.3 (C-6''' or C-6'), 64.0 (C-3''), 58.0 (C-2'), 53.2 (C-2'''), 39.4 ( $\text{NCH}_2$ ), 27.8 ( $\text{CH}_2$ ), 26.3 ( $\text{CH}_2$ ), 22.2 ( $\text{CH}_2$  and  $\text{NHC}=\text{OCH}_3$ ); HRMS (ESI-TOF) calcd for  $\text{C}_{31}\text{H}_{52}\text{N}_3\text{O}_{37}\text{S}_5$  [ $\text{M}-7\text{Na}+6\text{H}$ ] $^-$ : 1218.0883; found: 1218.0885.

**63. GlcNS6S-I doA2S-GlcNAc6S-I doA2S**

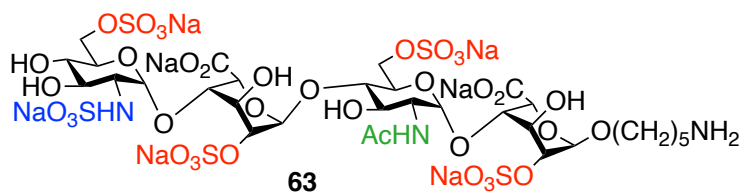

**5-Aminopentanyl 2-deoxy-2-sulfamino-6-O-sulfonato- $\alpha$ -D-glucopyranosyl-(1 $\rightarrow$ 4)-2-O-sulfonato- $\alpha$ -L-idopyranosyluronate-(1 $\rightarrow$ 4)-2-deoxy-2-acetamido-6-O-sulfonato- $\alpha$ -D-glucopyranosyl-(1 $\rightarrow$ 4)-2-O-sulfonato- $\alpha$ -L-idopyranoside uronate hepta sodium salt (63).**

Compound **85** (16 mg, 0.0073 mmol) was subjected to *N*-acetylation, N<sub>3</sub> to NH<sub>2</sub>, *N*-sulfation, and hydrogenation according to the general procedures to give tetrasaccharide **63** (6.0 mg, 60% for four steps). <sup>1</sup>H NMR (400 MHz, D<sub>2</sub>O):  $\delta$  5.30 (d, *J* = 3.3 Hz, 1H, H-1'''), 5.14 (d, *J* = 2.1 Hz, 1H, H-1''), 5.04 (d, *J* = 3.5 Hz, 1H, H-1'), 5.03 (s, 1H, H-1), 4.85 (d, *J* = 2.3 Hz, 1H, H-5''), 4.55 (d, *J* = 2.0 Hz, 1H, H-5), 4.29–4.10 (m, 8H, H-6', H-6''', H-2'', H-3'', H-2, H-3), 4.02–3.92 (m, 4H, H-4'', H-4, H-5', H-2'), 3.85–3.82 (m, 1H, H-5'''), 3.70–3.53 (m, 5H, H-4', OCH<sub>2</sub>, H-3''', H-3'), 3.48 (t, *J* = 9.4 Hz, 1H, H-4'''), 3.16 (dd, *J* = 10.1, 3.5 Hz, 1H, H-2'''), 2.92 (t, *J* = 7.5 Hz, 2H, NCH<sub>2</sub>), 1.97 (s, 3H, NHC=OCH<sub>3</sub>), 1.62–1.52 (m, 4H, 2 X CH<sub>2</sub>), 1.39–1.31 (m, 2H, CH<sub>2</sub>); <sup>13</sup>C NMR (100 MHz, D<sub>2</sub>O):  $\delta$  174.8 (NHC=O), 174.7 (C-6), 174.0 (C-6''), 99.3 (C-1''), 98.5 (C-1), 97.7 (C-1'''), 93.5 (C-1'), 76.3 (C-4'), 76.1 (C-4''), 75.0 (C-2''), 73.8 (C-2), 70.8 (C-4 and C-3'''), 70.1 (C-5'''), 69.9 (C-3'), 69.4 (C-5'), 69.1 (C-4'''), 68.3 (C-5'''), 68.2 (C-3'' and OCH<sub>2</sub>), 66.8 (C-5), 66.44 (C-6' or C-6'''), 66.36 (C-6' or C-6'''), 63.6 (C-3), 57.9 (C-2'''), 53.3 (C-2'), 39.4 (NCH<sub>2</sub>), 27.8 (CH<sub>2</sub>), 26.2 (CH<sub>2</sub>), 22.3 (NHC=OCH<sub>3</sub>), 22.2 (CH<sub>2</sub>); HRMS (ESI-TOF) calcd for C<sub>31</sub>H<sub>52</sub>N<sub>3</sub>O<sub>37</sub>S<sub>5</sub> [M–7Na+6H]<sup>–</sup>: 1218.0883; found: 1218.0897.

**64. GlcNS6S-IdoA2S-GlcNS6S-IdoA2S**

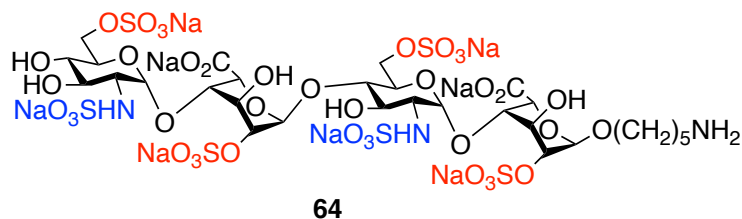

**5-Aminopentanyl 2-deoxy-2-sulfamino-6-O-sulfonato- $\alpha$ -D-glucopyranosyl-(1 $\rightarrow$ 4)-2-O-sulfonato- $\alpha$ -L-idopyranosyluronate-(1 $\rightarrow$ 4)-2-deoxy-2-acetamido-6-O-sulfonato-**

**$\alpha$ -D-glucopyranosyl-(1 $\rightarrow$ 4)-2-O-sulfonato- $\alpha$ -L-idopyranoside uronate hepta sodium salt (64).**

Compound **85** (17 mg, 0.0078 mmol) was subjected to N<sub>3</sub> to NH<sub>2</sub>, N-sulfation, and hydrogenation according to the general procedures to give tetrasaccharide **64** (8.0 mg, 71% for three steps). <sup>1</sup>H NMR (400 MHz, D<sub>2</sub>O):  $\delta$  5.33 (d,  $J$  = 3.5 Hz, 1H, H-1'''), 5.29 (d,  $J$  = 3.5 Hz, 1H, H-1'), 5.15 (d,  $J$  = 2.3 Hz, 1H, H-1''), 5.06 (d,  $J$  = 1.9 Hz, 1H, H-1), 4.79 (d,  $J$  = 2.6 Hz, 1H, H-5''), 4.45 (d,  $J$  = 2.5 Hz, 1H, H-5), 4.34–4.26 (m, 3H, H-6', H-6''', H-2''), 4.20–4.11 (m, 5H, H-6', H-6''', H-3'', H-2, H-3), 4.03 (t,  $J$  = 2.8 Hz, 1H, H-4''), 3.99 (t,  $J$  = 2.5 Hz, 1H, H-4), 3.95–3.87 (m, 2H, H-5', H-5'''), 3.72–3.55 (m, 5H, H-4', OCH<sub>2</sub>, H-3'', H-3'), 3.49 (t,  $J$  = 9.5 Hz, 1H, H-4'''), 3.20 (dd,  $J$  = 10.4, 3.5 Hz, 1H, H-2'), 3.17 (dd,  $J$  = 10.3, 3.5 Hz, 1H, H-2'''), 2.92 (t,  $J$  = 7.5 Hz, 2H, NCH<sub>2</sub>), 1.62–1.52 (m, 4H, 2 X CH<sub>2</sub>), 1.39–1.31 (m, 2H, CH<sub>2</sub>); <sup>13</sup>C NMR (100 MHz, D<sub>2</sub>O):  $\delta$  174.7 (C-6''), 174.6 (C-6), 99.1 (C-1''), 98.8 (C-1), 97.0 (C-1'''), 96.9 (C-1'), 76.0 (C-2), 75.9 (C-4''), 75.8 (C-4' and C-4), 75.6 (C-2''), 70.9 (C-3'''), 69.9 (C-5'''), 69.5 (C-3'), 69.22 (C-5'), 69.17 (C-4'''), 69.0 (C-5''), 68.8 (C-3''), 68.5 (C-3), 68.3 (C-5), 68.1 (OCH<sub>2</sub>), 66.4 (C-6' or C-6'''), 66.3 (C-6' or C-6''), 57.93 (C-2'''), 57.89 (C-2'), 39.4 (NCH<sub>2</sub>), 27.8 (CH<sub>2</sub>), 26.2 (CH<sub>2</sub>), 22.2 (CH<sub>2</sub>); HRMS (ESI-TOF) calcd for C<sub>29</sub>H<sub>50</sub>N<sub>3</sub>O<sub>39</sub>S<sub>6</sub> [M–8Na+7H]<sup>-</sup>: 1256.0346; found: 1256.0341.

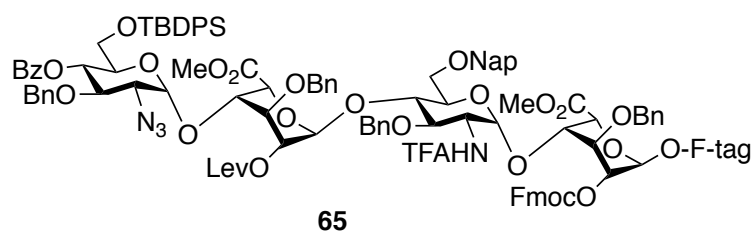

***N*-(Benzyl)-3,3,4,4,5,5,6,6,7,7,8,8,8-tridecafluorooctyl-benzoyloxycarbonyl-5-aminopentyl (2-azido-3-O-benzyl-4-O-benzoyl-2-deoxy-6-O-*tert*-butyldiphenylsilyl- $\alpha$ -D-glucopyranosyl)-(1 $\rightarrow$ 4)-(methyl 3-O-benzyl-2-O-levulinoyl- $\alpha$ -L-idopyranosyluronate)-(1 $\rightarrow$ 4)-(3-O-benzyl-2-deoxy-6-O-2-naphthylmethyl-2-**

**trifluoroacetamido- $\alpha$ -D-glucopyranosyl)-(1 $\rightarrow$ 4)-(methyl 3-O-benzyl-2-O-((9H-fluoren-9-yl)methoxycarbonyl))- $\alpha$ -L-idopyranosyluronate (65).**

A mixture of donor **74**<sup>3</sup> (1.7 g, 1.5 mmol), acceptor **72** (1.3 g, 0.75 mmol) and powdered 4 Å molecular sieves was suspended in anhydrous DCM (20 mL) and stirred at RT. After 20 min, NIS (0.42 g, 1.9 mmol) and AgOTf (115 mg, 0.46 mmol) were added. The solution was stirred for another 1 h before pyridine (0.10 mL) was added. The mixture was filtered, and the residue was purified by silica gel column chromatography, eluting first with 3:1  $\rightarrow$  2.5:1 hexanes/EtOAc to afford compound **21** (1.6 g, 80%) as a colorless foam.  $R_f$  0.73 (4:3 hexanes/EtOAc); <sup>1</sup>H NMR (400 MHz, CD<sub>3</sub>COCD<sub>3</sub>):  $\delta$  8.28 (d,  $J$  = 8.0 Hz, 1H, NH), 8.06–7.96 (m, 4H, Ar), 7.93–7.86 (m, 4H, Ar), 7.75–7.55 (m, 10H, Ar), 7.50–7.20 (m, 36H, Ar), 7.13–7.03 (m, 5H, Ar), 5.66 (t,  $J$  = 9.6 Hz, 1H, H-4'''), 5.47 (d,  $J$  = 4.0 Hz, 1H, H-1''), 5.39 (d,  $J$  = 3.4 Hz, 1H, H-1'''), 5.26 (d,  $J$  = 3.4 Hz, 1H, H-1'), 5.18 (d,  $J$  = 4.5 Hz, 1H, H-1), 5.14 (s, 2H, NCO<sub>2</sub>CH<sub>2</sub>), 5.07 (t,  $J$  = 4.5 Hz, 1H, H-2''), 4.92 (d,  $J$  = 4.1 Hz, 1H, H-5), 4.91 (d,  $J$  = 11.5 Hz, 1H, CH<sub>2</sub>Ph), 4.86 (s, 2H, NapCH<sub>2</sub>), 4.83–4.79 (m, 3H, H-2, H-5'', CH<sub>2</sub>Ph), 4.78–4.64 (m, 6H, OCH<sub>2</sub>Ph), 4.54–4.46 (m, 1H, OCO<sub>2</sub>CH<sub>2</sub>-Fluoren), 4.50 (s, 2H, NCH<sub>2</sub>Ph), 4.35–4.30 (m, 3H, H-4, H-2', OCO<sub>2</sub>CH<sub>2</sub>-Fluoren), 4.27–4.25 (m, 1H, OCO<sub>2</sub>CH<sub>2</sub>CH), 4.24 (t,  $J$  = 4.5 Hz, 1H, H-4''), 4.20–4.12 (m, 3H, H-3, H-3'', H-5'), 4.10–4.01 (m, 4H, H-4', H-3''', H-5''', H-6'), 3.91–3.84 (m, 2H, H-3', H-6''), 3.81–3.80 (m, 2H, H-6'''), 3.77–3.73 (m, 1H, OCH<sub>2</sub>CH<sub>2</sub>), 3.74 (s, 3H, OCH<sub>3</sub>), 3.51–3.46 (m, 1H, OCH<sub>2</sub>CH<sub>2</sub>), 3.47 (s, 3H, OCH<sub>3</sub>''), 3.23–3.18 (m, 2H, NCH<sub>2</sub>), 2.98–2.94 (m, 2H, PhCH<sub>2</sub>CH<sub>2</sub>), 2.77–2.74 (m, 2H, CH<sub>2</sub>), 2.62–2.47 (m, 4H, CH<sub>2</sub>, PhCH<sub>2</sub>CH<sub>2</sub>), 2.10 (s, 3H, CH<sub>3</sub>C=O), 1.56–1.48 (m, 4H, 2 X CH<sub>2</sub>), 1.35–1.27 (m, 2H, CH<sub>2</sub>), 1.01 (s, 9H, (CH<sub>3</sub>)<sub>3</sub>C); <sup>13</sup>C NMR (100 MHz, CD<sub>3</sub>COCD<sub>3</sub>):  $\delta$  205.6 (CH<sub>3</sub>C=OCH<sub>2</sub>), 171.8 (CH<sub>2</sub>C=O), 169.5 (C=OOCH<sub>3</sub>), 168.9 (C=OOCH<sub>3</sub>), 164.7 (C=OPh), 157.0 (q, <sup>2</sup> $J_{C,F}$  = 37.0 Hz, CF<sub>3</sub>C=O), 155.9 (NCO<sub>2</sub>), 154.1 (Fluoren-CH<sub>2</sub>OC=O), 143.5 (Ar), 143.3 (Ar), 141.2 (Ar), 138.9 (Ar), 138.7 (Ar), 138.6 (Ar), 138.1 (Ar), 137.1 (Ar), 137.9 (Ar), 137.8 (Ar), 136.2 (Ar), 135.6 (Ar), 135.5 (Ar), 133.5 (Ar), 133.4 (Ar), 133.1 (Ar), 133.0 (Ar), 132.9 (Ar), 129.9 (Ar), 129.21 (Ar), 129.67 (Ar), 129.6



(Ar), 128.8 (Ar), 128.5 (Ar), 128.4 (Ar), 128.3 (Ar), 128.2 (Ar), 128.15 (Ar), 128.08 (Ar), 128.04 (Ar), 128.00 (Ar), 127.99 (Ar), 127.8 (Ar), 127.74 (Ar), 127.69 (Ar), 127.66 (Ar), 127.61 (Ar), 127.58 (Ar), 127.4 (Ar), 127.2 (Ar), 127.1 (Ar), 126.9 (Ar), 126.8 (Ar), 126.4 (Ar), 126.1 (Ar), 126.0 (Ar), 125.8 (Ar), 125.2 (Ar), 125.1 (Ar), 120.1 (Ar), 116.1 (q,  $^1J_{C,F} = 287$  Hz, CF<sub>3</sub>), 98.1 (C-1), 98.0 (C-1''), 97.2 (C-1'''), 96.5 (C-1'), 77.8 (C-3', C-3'''), 75.5 (C-3''), 75.2 (C-5'), 74.6 (C-3), 74.2 (CH<sub>2</sub>Ph), 74.16 (CH<sub>2</sub>Ph), 73.1 (NapCH<sub>2</sub>, CH<sub>2</sub>Ph), 72.9 (CH<sub>2</sub>Ph), 72.4 (C-4, C-4''), 71.9 (C-5'''), 71.2 (C-4'), 70.4 (C-4'''), 70.0 (C-2''), 69.9 (CO<sub>2</sub>CH<sub>2</sub>-Fluoren), 69.7 (C-5, C-5''), 68.5 (OCH<sub>2</sub>CH<sub>2</sub>), 68.1 (C-6'), 66.3 (NCO<sub>2</sub>CH<sub>2</sub>Ph), 63.0 (C-2'''), 62.1 (C-6'''), 53.4 (C-2'), 51.6 (OCH<sub>3</sub>), 51.4 (OCH<sub>3</sub>''), 49.9 (NCH<sub>2</sub>Ph), 46.5 (CHCH<sub>2</sub>, NCH<sub>2</sub>CH<sub>2</sub>), 37.3 (CH<sub>2</sub>C=O), 32.1 (t,  $^2J_{C,F} = 21.6$  Hz, CH<sub>2</sub>CF<sub>2</sub>), 29.0 (CH<sub>2</sub>), 28.9 (CH<sub>3</sub>C=O), 27.7 (CH<sub>2</sub>C=O), 27.5 (CH<sub>2</sub>), 26.3 ((CH<sub>3</sub>)<sub>3</sub>C), 25.7 (t,  $^3J_{C,F} = 5.0$  Hz, CH<sub>2</sub>CH<sub>2</sub>CF<sub>2</sub>), 23.1 (CH<sub>2</sub>), 18.8 ((CH<sub>3</sub>)<sub>3</sub>C); HRMS (ESI-TOF) m/z [M + H]<sup>+</sup> calcd for C<sub>138</sub>H<sub>138</sub>F<sub>16</sub>N<sub>5</sub>O<sub>29</sub>Si 2660.8992; Found 2660.8984. gHSQC 2-D NMR (without <sup>1</sup>H decoupling):  $^1J_{C1,H1} = 172.1$  Hz,  $^1J_{C1',H1'} = 175.7$  Hz,  $^1J_{C1'',H1''} = 173.2$  Hz,  $^1J_{C1''',H1'''} = 176.1$  Hz. The coupling constants of  $^1J_{C1,H1}$  (172.1 Hz) and  $^1J_{C1'',H1''}$  (173.2) Hz are above 170 Hz, which confirms the α configuration of the two IdoA-GlcN linkages.<sup>4</sup> In addition, the coupling constants of  $^1J_{C1',H1'}$  (175.7 Hz) and  $^1J_{C1''',H1'''}$  (176.1) Hz are greater than 170 Hz, which is indicative of the α configuration for the two GlcN-IdoA linkages.

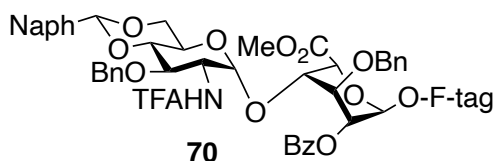

***N*-(Benzyl)-3,3,4,4,5,5,6,6,7,7,8,8,8-tridecafluorooctyl-benzoyloxycarbonyl-5-aminopentyl (3-*O*-benzyl-2-deoxy-4,6-*O*-2-naphthylidene-2-trifluoroacetamido-α-*D*-glucopyranosyl)-(1→4)-methyl-2-*O*-benzoyl-3-*O*-benzyl-α-*L*-idopyranosyluronate (70).**

A mixture of donor **69**<sup>3</sup> (0.47 g, 0.48 mmol), the F-tag linker **S56** (0.78 g, 1.2 mmol), and powdered 4 Å molecular sieves was suspended in anhydrous DCM (35 mL) and stirred

at RT. After 30 min, NIS (0.21 g, 0.96 mmol) was added and the mixture was cooled to –50 °C for 10 min. Then, TfOH (82  $\mu$ L, 0.93 mmol) was added via syringe and the solution was slowly warmed up to –20 °C. Et<sub>3</sub>N (100  $\mu$ L) was added to quench the reaction and the mixture was filtered. The filtrate was concentrated, and the resulting residue was purified by silica gel column chromatography (elution with 5:1 → 4:1 hexanes/EtOAc) to afford compound **72** (0.54 g, 72%) as a colorless foam. *R*<sub>f</sub> 0.74 (4:3 hexanes/EtOAc); <sup>1</sup>H NMR (400 MHz, CD<sub>3</sub>COCD<sub>3</sub>):  $\delta$  8.44 (d, *J* = 8.9 Hz, 1H, NH), 8.15–8.12 (m, 3H, Ar), 8.03–7.98 (m, 3H, Ar), 7.78–7.76 (m, 1H, Ar), 7.61–7.58 (m, 2H, Ar), 7.43–7.17 (m, 22H, Ar), 6.00 (s, 1H, NapCH), 5.29 (t, *J* = 2.3 Hz, 1H, H-2), 5.26 (d, *J* = 3.6 Hz, 1H, H-1'), 5.23 (s, 1H, H-1), 5.19–5.16 (m, 2H, NCO<sub>2</sub>CH<sub>2</sub>), 4.95 (s, 1H, H-5), 4.91 (d, *J* = 11.7 Hz, 1H, 3-OCH<sub>2</sub>Ph), 4.80 (d, *J* = 11.7 Hz, 1H, 3-OCH<sub>2</sub>Ph), 4.75 (d, *J* = 11.7 Hz, 1H, 3'-OCH<sub>2</sub>Ph), 4.77 (d, *J* = 11.2 Hz, 1H, 3'-OCH<sub>2</sub>Ph), 4.56–4.51 (m, 4H, H-5', H-6', NCH<sub>2</sub>Ph), 4.49 (dd, *J* = 3.0, 2.0 Hz, 1H, H-4), 4.32–4.25 (m, 3H, H-3, H-2', 3'-OCH<sub>2</sub>Ph), 4.07 (t, *J* = 10.0 Hz, 1H, H-3'), 4.00 (t, *J* = 9.5 Hz, 1H, H-4'), 3.94 (t, *J* = 9.0 Hz, 1H, H-6'), 3.87–3.79 (m, 1H, OCH<sub>2</sub>CH<sub>2</sub>), 3.82 (s, 3H, OCH<sub>3</sub>), 3.60–3.52 (m, 1H, OCH<sub>2</sub>CH<sub>2</sub>), 3.26–3.21 (m, 2H, NCH<sub>2</sub>), 3.01–2.97 (m, 2H, PhCH<sub>2</sub>CH<sub>2</sub>), 2.65–2.51 (m, 2H, PhCH<sub>2</sub>CH<sub>2</sub>), 1.66–1.55 (m, 4H, 2 X CH<sub>2</sub>), 1.42–1.33 (m, 2H, CH<sub>2</sub>); <sup>13</sup>C NMR (100 MHz, CD<sub>3</sub>COCD<sub>3</sub>):  $\delta$  169.2 (C=OOCH<sub>3</sub>), 165.0 (C=OPh), 157.0 (q, <sup>2</sup>*J*<sub>C,F</sub> = 36.8 Hz, CF<sub>3</sub>C=O), 155.6 (NCO<sub>2</sub>), 139.0 (Ar), 138.9 (Ar), 138.6 (Ar), 138.1 (Ar), 135.7 (Ar), 133.7 (Ar), 133.1 (Ar), 133.0 (Ar), 129.9 (Ar), 129.7 (Ar), 128.8 (Ar), 128.5 (Ar), 128.4 (Ar), 128.3 (Ar), 128.2 (Ar), 128.1 (Ar), 127.9 (Ar), 127.8 (Ar), 127.7 (Ar), 127.6 (Ar), 127.3 (Ar), 127.1 (Ar), 126.8 (Ar), 126.5 (Ar), 126.3 (Ar), 125.6 (Ar), 124.1 (Ar), 116.0 (q, <sup>1</sup>*J*<sub>C,F</sub> = 287.6 Hz, CF<sub>3</sub>), 101.4 (NapCH), 99.4 (C-1), 98.7 (C-1'), 82.9 (C-4'), 75.8 (C-3'), 75.4 (C-3), 75.1 (C-4), 74.0 (3'-OCH<sub>2</sub>Ph), 71.9 (3-OCH<sub>2</sub>Ph), 68.4 (C-2), 68.3 (C-6'), 68.0 (OCH<sub>2</sub>CH<sub>2</sub>), 67.1 (C-5), 66.3 (NCO<sub>2</sub>CH<sub>2</sub>Ph), 63.8 (C-5'), 54.1 (C-2'), 51.4 (OCH<sub>3</sub>), 50.0, 49.8 (NCH<sub>2</sub>Ph), 46.9, 46.0 (NCH<sub>2</sub>CH<sub>2</sub>), 32.1 (t, <sup>2</sup>*J*<sub>C,F</sub> = 21.8 Hz, CH<sub>2</sub>C<sub>6</sub>F<sub>13</sub>), 29.0 (CH<sub>2</sub>), 27.4 (CH<sub>2</sub>), 25.7 (t, <sup>3</sup>*J*<sub>C,F</sub> = 4.3 Hz, CH<sub>2</sub>CH<sub>2</sub>CF<sub>2</sub>), 23.2 (CH<sub>2</sub>); HRMS (ESI-TOF) *m/z* [M + H]<sup>+</sup> calcd for C<sub>75</sub>H<sub>71</sub>F<sub>16</sub>N<sub>2</sub>O<sub>15</sub> 1543.4598; Found 1543.4595.

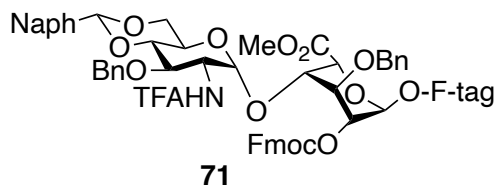

***N*-(Benzyl)-3,3,4,4,5,5,6,6,7,7,8,8,8-tridecafluorooctyl-benzylloxycarbonyl-5-aminopentyl (3-*O*-benzyl-2-deoxy-4,6-*O*-2-naphthylidene-2-trifluoroacetamido- $\alpha$ -D-glucopyranosyl)-(1 $\rightarrow$ 4)-(methyl 3-*O*-benzyl-2-*O*-((9*H*-fluoren-9-yl)methoxycarbonyl))- $\alpha$ -L-idopyranosyluronate (71).**

To a mixture of disaccharide **S51** (0.12 g, 0.13 mmol) in pyridine (4.0 mL) at RT was added FmocCl (0.66 g, 2.6 mmol) portion-wise (0.22 g X 3). The reaction was stirred for 2 h, concentrated under reduced pressure, and the resulting residue was dissolved in DCM. The organic layer was washed with brine, dried over Na<sub>2</sub>SO<sub>4</sub>, and concentrated. Purification by silica gel column chromatography (elution with 6:1  $\rightarrow$  4:1 hexanes/EtOAc) afforded compound **71** (0.13 g, 90%) as a colorless foam. *R*<sub>f</sub> 0.47 (2:1 hexanes/EtOAc); *R*<sub>f</sub> 0.71 (4:3 hexanes/EtOAc); <sup>1</sup>H NMR (400 MHz, CD<sub>3</sub>COCD<sub>3</sub>):  $\delta$  8.23 (d, *J* = 8.0 Hz, 1H, NH), 8.03 (s, 1H, Ar), 7.91–7.89 (m, 3H, Ar), 7.83–7.81 (m, 2H, Ar), 7.66–7.59 (m, 3H, Ar), 7.53–7.51 (m, 2H, Ar), 7.37–7.16 (m, 24H, Ar), 5.26 (d, *J* = 3.6 Hz, 1H, H-1'), 5.14–5.12 (m, 3H, H-1, NCO<sub>2</sub>CH<sub>2</sub>), 4.96 (d, *J* = 11.2 Hz, 1H, 3'-OCH<sub>2</sub>Ph), 4.93 (d, *J* = 4.4 Hz, 1H, H-5), 4.82 (dd, *J* = 5.6, 4.9 Hz, 1H, H-2), 4.81 (s, 2H, NapCH<sub>2</sub>), 4.77 (d, *J* = 11.2 Hz, 1H, 3'-OCH<sub>2</sub>Ph), 4.72 (s, 2H, 3-OCH<sub>2</sub>Ph), 4.52–4.46 (m, 1H, OCO<sub>2</sub>CH<sub>2</sub>-Fluoren), 4.48 (s, 2H, NCH<sub>2</sub>Ph), 4.38–4.32 (m, 2H, H-4, OCO<sub>2</sub>CH<sub>2</sub>-Fluoren), 4.28–4.23 (m, 2H, H-2', OCO<sub>2</sub>CH<sub>2</sub>CH), 4.19 (t, *J* = 5.8 Hz, 1H, H-3), 4.08–4.03 (m, 1H, H-5'), 3.95 (dd, *J* = 10.8, 2.1 Hz, 1H, H-6'), 3.88–3.78 (m, 3H, H-3', H-4', H-6'), 3.82 (s, 3H, OCH<sub>3</sub>), 3.74 (br, 1H, OCH<sub>2</sub>CH<sub>2</sub>), 3.46 (br, 1H, OCH<sub>2</sub>CH<sub>2</sub>), 3.22–3.17 (m, 2H, NCH<sub>2</sub>), 2.97–2.93 (m, 2H, PhCH<sub>2</sub>CH<sub>2</sub>), 2.60–2.47 (m, 2H, PhCH<sub>2</sub>CH<sub>2</sub>), 1.56–1.48 (m, 4H, 2 X CH<sub>2</sub>), 1.35–1.27 (m, 2H, CH<sub>2</sub>); <sup>13</sup>C NMR (100 MHz, CD<sub>3</sub>COCD<sub>3</sub>):  $\delta$  169.3 (C=OOCH<sub>3</sub>), 156.9 (q, <sup>2</sup>*J*<sub>C,F</sub> = 36.8 Hz, CF<sub>3</sub>C=O), 155.6 (NCO<sub>2</sub>), 154.1 (Fluoren-CH<sub>2</sub>OC=O), 143.5 (Ar), 143.4 (Ar), 141.2

(Ar), 139.1 (Ar), 138.9 (Ar), 138.6 (Ar), 137.9 (Ar), 136.5 (Ar), 133.5 (Ar), 133.0 (Ar), 128.5 (Ar), 128.4 (Ar), 128.2 (Ar), 128.1 (Ar), 127.94 (Ar), 127.91 (Ar), 127.86 (Ar), 127.6 (Ar), 127.5 (Ar), 127.4 (Ar), 127.3 (Ar), 127.2 (Ar), 127.1 (Ar), 126.0 (Ar), 125.8 (Ar), 125.7 (Ar), 125.6 (Ar), 125.2 (Ar), 125.1 (Ar), 120.1 (Ar), 116.1 (q,  $^1J_{C,F} = 288.0$  Hz, CF<sub>3</sub>), 98.2 (C-1'), 96.7 (C-1), 79.5 (C-3'), 75.2 (C-3), 74.45 (C-2), 74.40 (3'-OCH<sub>2</sub>Ph), 73.1 (NapCH<sub>2</sub>), 72.86 (3-OCH<sub>2</sub>Ph), 72.83 (C-5'), 72.5 (C-4), 71.1 (C-4'), 69.94 (C-5), 69.89 (Fluorene-CH<sub>2</sub>O), 69.6 (C-6'), 68.5 (OCH<sub>2</sub>CH<sub>2</sub>), 66.3 (NCO<sub>2</sub>CH<sub>2</sub>Ph), 53.2 (C-2'), 51.6 (OCH<sub>3</sub>), 50.0 49.8 (NCH<sub>2</sub>Ph), 46.5 (CHCH<sub>2</sub>, NCH<sub>2</sub>CH<sub>2</sub>), 32.1 (t,  $^2J_{C,F} = 21.7$  Hz, CH<sub>2</sub>CF<sub>2</sub>), 29.0 (CH<sub>2</sub>), 27.8 (CH<sub>2</sub>), 25.7 (t,  $^3J_{C,F} = 4.2$  Hz, CH<sub>2</sub>CH<sub>2</sub>CF<sub>2</sub>), 23.0 (CH<sub>2</sub>); HRMS (ESI-TOF) m/z [M + H]<sup>+</sup> calcd for C<sub>83</sub>H<sub>79</sub>F<sub>16</sub>N<sub>2</sub>O<sub>16</sub> 1663.5175; Found 1663.5189.

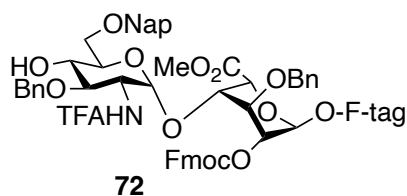

***N*-(Benzyl)-3,3,4,4,5,5,6,6,7,7,8,8,8-tridecafluorooctyl-benzyloxycarbonyl-5-aminopentyl (3-*O*-benzyl-2-deoxy-6-*O*-2-naphthylmethyl-2-trifluoroacetamido- $\alpha$ -D-glucopyranosyl)-(1 $\rightarrow$ 4)-(methyl 3-*O*-benzyl-2-*O*-((9*H*-fluorene-9-yl)methoxycarbonyl))- $\alpha$ -L-idopyranosyluronate (72).**

To a suspension of compound **71** (1.0 g, 0.60 mmol) in DCM (25 mL) were added triethylsilane (2.5 mL, 16 mmol) and trifluoroacetic anhydride (0.25 g, 1.2 mmol) at 0 °C. After 10 min, trifluoroacetic acid (0.48 g, 4.2 mmol) was added dropwise. The reaction was stirred at RT for 1 h and then quenched with saturated aq. NaHCO<sub>3</sub>. The resulting mixture was filtered, diluted with DCM (20 mL), and the organic layer was washed with brine, dried over Na<sub>2</sub>SO<sub>4</sub>, concentrated and purified by silica gel column chromatography (elution with 3:1  $\rightarrow$  2:1 hexanes/EtOAc) to afford compound **72** (0.80 g, 80%) as a colorless foam. *R*<sub>f</sub> 0.48 (4:3 hexanes/EtOAc); <sup>1</sup>H NMR (400 MHz, CD<sub>3</sub>COCD<sub>3</sub>):  $\delta$  8.32 (d, *J* = 8.5 Hz, 1H, NH), 7.91–7.86 (m, 6H, Ar), 7.65–7.63 (m, 2H, Ar), 7.56–7.39 (m, 5H, Ar),

7.33–7.20 (m, 21H, Ar), 5.26 (d,  $J = 3.6$  Hz, 1H, H-1'), 5.14–5.12 (m, 3H, H-1, NCO<sub>2</sub>CH<sub>2</sub>), 4.96 (d,  $J = 11.2$  Hz, 1H, 3'-OCH<sub>2</sub>Ph), 4.93 (d,  $J = 4.4$  Hz, 1H, H-5), 4.82 (dd,  $J = 5.6, 4.9$  Hz, 1H, H-2), 4.81 (s, 2H, NapCH<sub>2</sub>), 4.77 (d,  $J = 11.2$  Hz, 1H, 3'-OCH<sub>2</sub>Ph), 4.72 (s, 2H, 3-OCH<sub>2</sub>Ph), 4.52–4.46 (m, 1H, OCO<sub>2</sub>CH<sub>2</sub>-Fluoren), 4.48 (s, 2H, NCH<sub>2</sub>Ph), 4.38–4.32 (m, 2H, H-4, OCO<sub>2</sub>CH<sub>2</sub>-Fluoren), 4.28–4.23 (m, 2H, H-2', OCO<sub>2</sub>CH<sub>2</sub>CH), 4.19 (t,  $J = 5.8$  Hz, 1H, H-3), 4.08–4.03 (m, 1H, H-5'), 3.95 (dd,  $J = 10.8, 2.1$  Hz, 1H, H-6'), 3.88–3.78 (m, 3H, H-3', H-4', H-6'), 3.82 (s, 3H, OCH<sub>3</sub>), 3.74 (br, 1H, OCH<sub>2</sub>CH<sub>2</sub>), 3.46 (br, 1H, OCH<sub>2</sub>CH<sub>2</sub>), 3.22–3.17 (m, 2H, NCH<sub>2</sub>), 2.97–2.93 (m, 2H, PhCH<sub>2</sub>CH<sub>2</sub>), 2.60–2.47 (m, 2H, PhCH<sub>2</sub>CH<sub>2</sub>), 1.56–1.48 (m, 4H, 2 X CH<sub>2</sub>), 1.35–1.27 (m, 2H, CH<sub>2</sub>); <sup>13</sup>C NMR (100 MHz, CD<sub>3</sub>COCD<sub>3</sub>): δ 169.3 (C=OOCH<sub>3</sub>), 156.9 (q, <sup>2</sup> $J_{C,F} = 36.8$  Hz, CF<sub>3</sub>C=O), 155.6 (NCO<sub>2</sub>), 154.1 (Fluoren-CH<sub>2</sub>OC=O), 143.5 (Ar), 143.4 (Ar), 141.2 (Ar), 139.1 (Ar), 138.9 (Ar), 138.6 (Ar), 137.9 (Ar), 136.5 (Ar), 133.5 (Ar), 133.0 (Ar), 128.5 (Ar), 128.4 (Ar), 128.2 (Ar), 128.1 (Ar), 127.94 (Ar), 127.91 (Ar), 127.86 (Ar), 127.6 (Ar), 127.5 (Ar), 127.4 (Ar), 127.3 (Ar), 127.2 (Ar), 127.1 (Ar), 126.0 (Ar), 125.8 (Ar), 125.7 (Ar), 125.6 (Ar), 125.2 (Ar), 125.1 (Ar), 120.1 (Ar), 116.1 (q, <sup>1</sup> $J_{C,F} = 288.0$  Hz, CF<sub>3</sub>), 98.2 (C-1'), 96.7 (C-1), 79.5 (C-3'), 75.2 (C-3), 74.45 (C-2), 74.40 (3'-OCH<sub>2</sub>Ph), 73.1 (NapCH<sub>2</sub>), 72.86 (3-OCH<sub>2</sub>Ph), 72.83 (C-5'), 72.5 (C-4), 71.1 (C-4'), 69.94 (C-5), 69.89 (Fluoren-CH<sub>2</sub>O), 69.6 (C-6'), 68.5 (OCH<sub>2</sub>CH<sub>2</sub>), 66.3 (NCO<sub>2</sub>CH<sub>2</sub>Ph), 53.2 (C-2'), 51.6 (OCH<sub>3</sub>), 50.0 49.8 (NCH<sub>2</sub>Ph), 46.5 (CHCH<sub>2</sub>, NCH<sub>2</sub>CH<sub>2</sub>), 32.1 (t, <sup>2</sup> $J_{C,F} = 21.7$  Hz, CH<sub>2</sub>CF<sub>2</sub>), 29.0 (CH<sub>2</sub>), 27.8 (CH<sub>2</sub>), 25.7 (t, <sup>3</sup> $J_{C,F} = 4.2$  Hz, CH<sub>2</sub>CH<sub>2</sub>CF<sub>2</sub>), 23.0 (CH<sub>2</sub>); HRMS (ESI-TOF)  $m/z$  [M + H]<sup>+</sup> calcd for C<sub>83</sub>H<sub>79</sub>F<sub>16</sub>N<sub>2</sub>O<sub>16</sub> 1663.5175; Found 1663.5189.

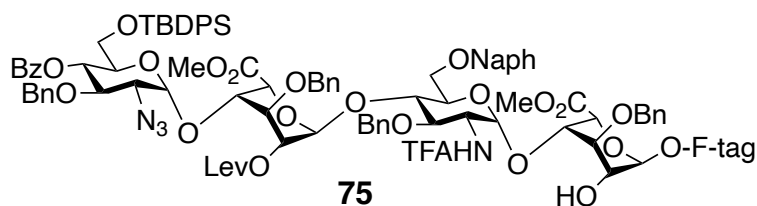

***N*-(Benzyl)-3,3,4,4,5,5,6,6,7,7,8,8,8-tridecafluorooctyl-benzoyloxycarbonyl-5-aminopentyl (2-azido-3-*O*-benzyl-4-*O*-benzoyl-2-deoxy-6-*O*-*tert*-butyldiphenylsilyl-**

**$\alpha$ -D-glucopyranosyl)-(1→4)-(methyl 3-O-benzyl-2-O-levulinoyl- $\alpha$ -L-idopyranosyluronate)-(1→4)-(3-O-benzyl-2-deoxy-6-O-2-naphthylmethyl-2-trifluoroacetamido- $\alpha$ -D-glucopyranosyl)-(1→4)-(methyl 3-O-benzyl- $\alpha$ -L-idopyranosyluronate (75).**

Compound **65** (0.73 g, 0.27 mmol) was treated according to the general procedure for Fmoc deprotection to give tetrasaccharide **75** (0.65 g, 96%);  $R_f$  0.57 (4:3 hexanes/EtOAc);  $^1\text{H}$  NMR (400 MHz,  $\text{CD}_3\text{COCD}_3$ ):  $\delta$  8.65 (d,  $J = 8.6$  Hz, 1H, NH), 8.03–7.95 (m, 4H, Ar), 7.90–7.81 (m, 2H, Ar), 7.75–7.51 (m, 8H, Ar), 7.47–7.18 (m, 32H, Ar), 7.12–7.03 (m, 5H, Ar), 5.64 (t,  $J = 9.8$  Hz, 1H, H-4'''), 5.42 (d,  $J = 3.0$  Hz, 1H, H-1''), 5.36 (d,  $J = 3.5$  Hz, 1H, H-1'''), 5.21 (d,  $J = 3.5$  Hz, 1H, H-1'), 5.15 (br, 2H,  $\text{NCO}_2\text{CH}_2$ ), 5.07 (t,  $J = 3.2$  Hz, 1H, H-2''), 4.98 (s, 1H, H-1), 4.87 (d,  $J = 1.5$  Hz, 1H, H-5), 4.83 (d,  $J = 3.1$  Hz, 1H, H-5''), 4.81–4.72 (m, 7H,  $\text{CH}_2\text{Ph}$ ,  $\text{NapCH}_2$ ), 4.64 (d,  $J = 11.2$  Hz, 1H,  $\text{OCH}_2\text{Ph}$ ), 4.63 (d,  $J = 10.9$  Hz, 1H,  $\text{OCH}_2\text{Ph}$ ), 4.51 (s, 2H,  $\text{NCH}_2\text{Ph}$ ), 4.43 (d,  $J = 11.3$  Hz, 1H,  $\text{OCH}_2\text{Ph}$ ), 4.27–3.98 (m, 9H), 3.91 (s, 1H, H-2), 3.80–3.73 (m, 6H), 3.72 (s, 3H,  $\text{OCH}_3$ ), 3.65 (dd,  $J = 10.3, 4.4$  Hz, 1H, H-2'''), 3.50–3.40 (m, 1H,  $\text{OCH}_2\text{CH}_2$ ), 3.39 (s, 3H,  $\text{OCH}_3$ '''), 3.26–3.19 (m, 2H,  $\text{NCH}_2$ ), 2.98–2.94 (m, 2H,  $\text{PhCH}_2\text{CH}_2$ ), 2.75–2.71 (m, 2H,  $\text{CH}_2$ ), 2.62–2.49 (m, 4H,  $\text{CH}_2$ ,  $\text{PhCH}_2\text{CH}_2$ ), 2.07 (s, 3H,  $\text{CH}_3\text{C}=\text{O}$ ), 1.63–1.53 (m, 4H, 2 X  $\text{CH}_2$ ), 1.40–1.27 (m, 2H,  $\text{CH}_2$ ), 1.02 (s, 9H,  $(\text{CH}_3)_3\text{C}$ );  $^{13}\text{C}$  NMR (100 MHz,  $\text{CD}_3\text{COCD}_3$ ):  $\delta$  205.6( $\text{CH}_3\text{C}=\text{OCH}_2$ ), 172.0 ( $\text{CH}_2\text{C}=\text{O}$ ), 169.9( $\text{C}=\text{OOCH}_3$ ), 168.8( $\text{C}=\text{OOCH}_3$ ), 164.7( $\text{C}=\text{OPh}$ ), 157.0 (q,  $^2J_{\text{C},\text{F}} = 37.0$  Hz,  $\text{CF}_3\text{C}=\text{O}$ ), 155.9 ( $\text{NCO}_2$ ), 139.0, 138.6, 138.5, 137.9, 137.8, 136.2, 135.6, 135.5, 133.5, 133.4, 133.0, 133.0, 129.9, 129.7, 129.7, 129.6, 128.7, 128.5, 128.5, 128.4, 128.2, 128.2, 128.1, 128.1, 128.0, 128.0, 127.8, 127.7, 127.7, 127.7, 127.7, 127.6, 127.5, 127.5, 127.4, 127.0, 126.8, 126.3, 126.1, 126.0, 125.7, 116.1 (q,  $^1J_{\text{C},\text{F}} = 287$  Hz,  $\text{CF}_3$ ), 101.2 (C-1), 97.6 (C-1''), 96.9 (C-1'''), 95.4 (C-1'), 78.3, 77.8, 74.7, 74.4, 74.2, 73.5, 73.4, 73.0, 72.7, 72.2, 72.0, 71.7, 71.6, 71.2, 70.4 (C-4'''), 68.8, 68.7, 68.1, 67.9, 67.3, 66.5 (C-2), 66.3 ( $\text{NCO}_2\text{CH}_2\text{Ph}$ ), 63.1 (C-2'''), 62.1, 53.6 (C-2'), 51.6 ( $\text{OCH}_3$ ), 51.2 ( $\text{OCH}_3$ '''), 50.1, 49.8, 46.9, 46.1, 37.3 ( $\text{CH}_2\text{C}=\text{O}$ ), 32.1 (t,  $^2J_{\text{C},\text{F}} = 21.6$  Hz,  $\text{CH}_2\text{CF}_2$ ), 29.2 ( $\text{CH}_3\text{C}=\text{O}$ ), 29.0 ( $\text{CH}_2$ ),

27.7 (CH<sub>2</sub>C=O), 26.3 ((CH<sub>3</sub>)<sub>3</sub>C), 25.7 (t, <sup>3</sup>J<sub>C,F</sub> = 5.0 Hz, CH<sub>2</sub>CH<sub>2</sub>CF<sub>2</sub>), 23.3 (CH<sub>2</sub>), 18.8 ((CH<sub>3</sub>)<sub>3</sub>C); HRMS (ESI-TOF) m/z [M – N<sub>2</sub>]<sup>+2</sup> calcd for C<sub>123</sub>H<sub>127</sub>F<sub>16</sub>N<sub>3</sub>O<sub>27</sub>Si 1205.9164; Found 1205.9174.

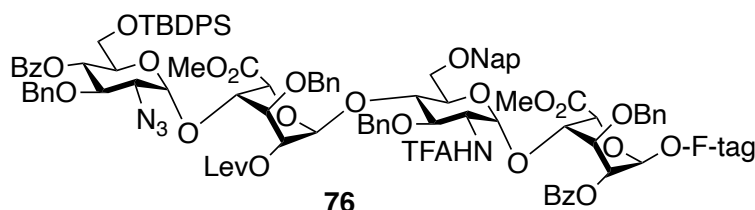

***N*-(Benzyl)-3,3,4,4,5,5,6,6,7,7,8,8,8-tridecafluorooctyl-benzoyloxycarbonyl-5-aminopentyl (2-azido-3-*O*-benzyl-4-*O*-benzoyl-2-deoxy-6-*O*-*tert*-butyldiphenylsilyl- $\alpha$ -D-glucopyranosyl)-(1 $\rightarrow$ 4)-(methyl 3-*O*-benzyl-2-*O*-levulinoyl- $\alpha$ -L-idopyranosyluronate)-(1 $\rightarrow$ 4)-(3-*O*-benzyl-2-deoxy-6-*O*-2-naphthylmethyl-2-trifluoroacetamido- $\alpha$ -D-glucopyranosyl)-(1 $\rightarrow$ 4)-methyl-2-*O*-benzoyl-3-*O*-benzyl- $\alpha$ -L-idopyranosyluronate (76).**

Method 1: To a solution of **75** (0.050 g, 0.021 mmol) in pyridine (2.0 mL) was added BzCl (0.30 g, 2.2 mmol) at RT. After stirring overnight, the mixture was concentrated under reduced pressure, and the residue was dissolved in DCM (20 mL). The organic layer was washed with brine, dried over Na<sub>2</sub>SO<sub>4</sub>, and concentrated. Purification by silica gel column chromatography (elution with 3:1  $\rightarrow$  2:1 hexanes/EtOAc) gave compound **76** (0.049 g, 95%) as a colorless foam.

Method 2: A mixture of donor **74** (0.72 g, 0.64 mmol), acceptor **S50** (0.50 g, 0.32 mmol) and powdered 4 Å molecular sieves was suspended in anhydrous DCM (8.0 mL) and stirred at RT. After 30 min, NIS (0.22 g, 0.98 mmol) and AgOTf (50 mg, 0.19 mmol) were added. The solution was stirred for another 1 h before Et<sub>3</sub>N (0.10 mL) was added. The mixture was filtered, concentrated, and the residue was purified by silica gel column chromatography (elution with 3:1  $\rightarrow$  2:1 hexanes/EtOAc) to afford compound **76** (0.67 g, 82%) as a colorless foam.

$R_f$  0.55 (3:2 hexanes/EtOAc);  $^1\text{H}$  NMR (400 MHz,  $\text{CDCl}_3$ ):  $\delta$  8.01–7.83 (m, 8H, Ar), 7.66–7.02 (m, 40H, Ar), 6.92–6.90 (m, 2H, Ar), 6.14 (d,  $J = 8.0$  Hz, 1H, NH), 5.59 (t,  $J = 9.5$  Hz, 1H, H-4'''), 5.45 (d,  $J = 4.7$  Hz, 1H, H-1''), 5.18–5.08 (m, 6H, H-1''', H-1', H-1, H-2,  $\text{NCO}_2\text{CH}_2$ ), 5.00 (t,  $J = 5.2$  Hz, 1H, H-2''), 4.83–4.71 (m, 6H), 4.65–4.45 (m, 7H), 4.17–3.86 (m, 10H), 3.78–3.62 (m, 5H), 3.59 (s, 3H,  $\text{OCH}_3$ ), 3.51–3.42 (m, 3H), 3.41 (s, 3H,  $\text{OCH}_3$ ), 3.22–3.10 (m, 2H,  $\text{NCH}_2$ ), 2.94–2.91 (m, 2H,  $\text{PhCH}_2\text{CH}_2$ ), 2.67–2.53 (m, 2H,  $\text{CH}_2$ ), 2.45–2.31 (m, 4H,  $\text{CH}_2$ ,  $\text{PhCH}_2\text{CH}_2$ ), 2.10 (s, 3H,  $\text{CH}_3\text{C}=\text{O}$ ), 1.60–1.48 (m, 4H, 2 X  $\text{CH}_2$ ), 1.35–1.27 (m, 2H,  $\text{CH}_2$ ), 1.01 (s, 9H,  $(\text{CH}_3)_3\text{C}$ );  $^{13}\text{C}$  NMR (100 MHz,  $\text{CDCl}_3$ ):  $\delta$  205.8 ( $\text{CH}_3\text{C}=\text{OCH}_2$ ), 171.9, 169.5, 169.2, 165.4, 164.8, 157.0 (q,  $^2J_{\text{C},\text{F}} = 37.0$  Hz,  $\text{CF}_3\text{C}=\text{O}$ ), 156.1 ( $\text{NCO}_2$ ), 138.8, 137.7, 137.5, 137.2, 137.1, 135.6, 135.5, 135.3, 133.8, 133.3, 133.1, 133.0, 132.9, 129.7, 129.6, 129.6, 129.2, 129.0, 128.6, 128.4, 128.4, 128.3, 128.2, 128.1, 128.1, 128.0, 127.9, 127.9, 127.8, 127.7, 127.6, 127.6, 127.3, 127.3, 127.2, 127.1, 126.9, 126.5, 126.1, 125.9, 115.5 (q,  $^1J_{\text{C},\text{F}} = 287$  Hz,  $\text{CF}_3$ ), 99.0 (C-1), 98.1 (C-1''), 97.8 (C-1'), 97.5 (C-1'''), 75.3, 75.0, 75.0, 74.5, 74.1, 73.9, 73.6, 73.0, 72.7, 72.6, 71.9, 71.4, 70.7 (C-2''), 70.3, 70.2 (C-4'''), 68.9, 68.0, 67.1, 66.8, 62.9, 62.0, 53.5, 52.7 (C-2'), 52.1 ( $\text{OCH}_3$ ), 51.8 ( $\text{OCH}_3$ ), 47.1 ( $\text{NCH}_2\text{Ph}$ ), 37.7 ( $\text{CH}_2\text{C}=\text{O}$ ), 32.9 (t,  $^2J_{\text{C},\text{F}} = 22.3$  Hz,  $\text{CH}_2\text{CF}_2$ ), 29.7, 29.1, 27.7, 26.6 ( $(\text{CH}_3)_3\text{C}$ ), 26.2 (t,  $^3J_{\text{C},\text{F}} = 4.0$  Hz,  $\text{CH}_2\text{CH}_2\text{CF}_2$ ), 23.3, 19.1 ( $(\text{CH}_3)_3\text{C}$ ); HRMS (ESI-TOF)  $m/z$   $[\text{M} + \text{H}]^+$  calcd for  $\text{C}_{130}\text{H}_{132}\text{F}_{16}\text{N}_5\text{O}_{28}\text{Si}$  2542.8572; Found 2542.7456. gHSQC 2-D NMR (without  $^1\text{H}$  decoupling):  $^1J_{\text{C}1,\text{H}1} = 171.1$  Hz,  $^1J_{\text{C}1',\text{H}1'} = 172.9$  Hz,  $^1J_{\text{C}1'',\text{H}1''} = 173.7$  Hz,  $^1J_{\text{C}1''',\text{H}1'''} = 174.9$  Hz. The coupling constants of  $^1J_{\text{C}1,\text{H}1}$  (171.1 Hz) and  $^1J_{\text{C}1'',\text{H}1''}$  (173.7) Hz are above 170 Hz, which confirms the  $\alpha$  configuration of the two IdoA-GlcN linkages.<sup>4</sup> In addition, the coupling constants of  $^1J_{\text{C}1',\text{H}1'}$  (172.9 Hz) and  $^1J_{\text{C}1''',\text{H}1'''}$  (174.9) Hz are greater than 170 Hz, which is indicative of the  $\alpha$  configuration for the two GlcN-IdoA linkages.



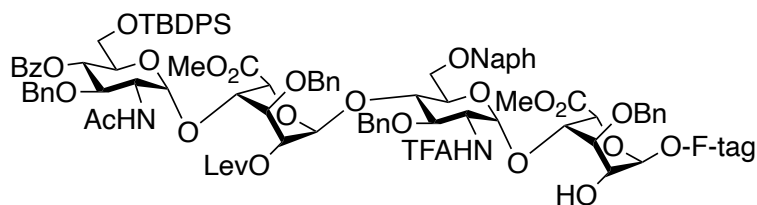

**77**

***N*-(Benzyl)-3,3,4,4,5,5,6,6,7,7,8,8,8-tridecafluorooctyl-benzoyloxycarbonyl-5-aminopentyl (2-acetamido-3-*O*-benzyl-4-*O*-benzoyl-2-deoxy-6-*O*-tert-butylidiphenylsilyl- $\alpha$ -D-glucopyranosyl)-(1 $\rightarrow$ 4)-(methyl 3-*O*-benzyl-2-*O*-levulinoyl- $\alpha$ -L-idopyranosyluronate)-(1 $\rightarrow$ 4)-(3-*O*-benzyl-2-deoxy-6-*O*-2-naphthylmethyl-2-trifluoroacetamido- $\alpha$ -D-glucopyranosyl)-(1 $\rightarrow$ 4)-(methyl 3-*O*-benzyl- $\alpha$ -L-idopyranosyluronate (77)).**

Compound **75** (0.50 g, 0.27 mmol) was treated according to the general procedure for N<sub>3</sub> to NHAc conversion to give tetrasaccharide **77** (0.42 g, 83%); *R*<sub>f</sub> 0.49 (1:2 hexanes/EtOAc); <sup>1</sup>H NMR (400 MHz, CD<sub>3</sub>COCD<sub>3</sub>):  $\delta$  8.49 (d, *J* = 9.5 Hz, 1H, NH), 7.99–7.97 (m, 2H, Ar), 7.90–7.74 (m, 4H, Ar), 7.68–7.61 (m, 4H, Ar), 7.53–7.19 (m, 28H, Ar), 7.12–7.05 (m, 11H, Ar), 5.69 (t, *J* = 9.6 Hz, 1H, H-4'''), 5.38 (d, *J* = 2.2 Hz, 1H, H-1''), 5.22 (d, *J* = 3.2 Hz, 1H, H-1'), 5.19 (d, *J* = 3.3 Hz, 1H, H-1'''), 5.14 (br, 2H, NCO<sub>2</sub>CH<sub>2</sub>), 5.07 (t, *J* = 3.0 Hz, 1H, H-2''), 4.97 (s, 1H, H-1), 4.91 (s, 1H), 4.85–4.63 (m, 10H), 4.54–4.51 (m, 3H, OCH<sub>2</sub>Ph, NCH<sub>2</sub>Ph), 4.45–4.39 (m, 2H), 4.26 (td, *J* = 10.3, 3.2 Hz, H-2'), 4.19–4.11 (m, 4H), 4.06–3.99 (m, 3H), 3.93–3.88 (m, 2H), 3.86–3.72 (m, 6H), 3.69 (s, 3H, OCH<sub>3</sub>), 3.50–3.40 (m, 1H, OCH<sub>2</sub>CH<sub>2</sub>), 3.35 (s, 3H, OCH<sub>3</sub>''), 3.26–3.19 (m, 2H, NCH<sub>2</sub>), 2.98–2.94 (m, 2H, PhCH<sub>2</sub>CH<sub>2</sub>), 2.80–2.46 (m, 6H, CH<sub>2</sub>, PhCH<sub>2</sub>CH<sub>2</sub>), 2.10 (s, 3H, CH<sub>3</sub>C=O), 1.79 (s, 3H, CH<sub>3</sub>C=ON), 1.63–1.53 (m, 4H, 2 X CH<sub>2</sub>), 1.40–1.27 (m, 2H, CH<sub>2</sub>), 1.03 (s, 9H, (CH<sub>3</sub>)<sub>3</sub>C); <sup>13</sup>C NMR (100 MHz, CD<sub>3</sub>COCD<sub>3</sub>):  $\delta$  206.1 (CH<sub>3</sub>C=OCH<sub>2</sub>), 171.9, 169.9, 169.2, 168.6, 164.7, 157.0 (q, <sup>2</sup>*J*<sub>C,F</sub> = 37.0 Hz, CF<sub>3</sub>C=O), 139.0, 138.6, 138.5, 138.4, 137.9, 136.3, 135.6, 135.5, 133.5, 133.2, 133.1, 133.0, 133.0, 130.1, 129.7, 129.6, 129.5, 128.7, 128.5, 128.4, 128.2, 128.1, 128.0, 127.9, 127.8, 127.7, 127.6, 127.6, 127.5, 127.5, 127.4, 127.2, 127.1, 127.0, 126.8, 126.1, 126.0, 125.9, 125.8, 116.1 (q, <sup>1</sup>*J*<sub>C,F</sub> = 287 Hz, CF<sub>3</sub>),

101.2 (C-1), 97.6 (C-1''), 97.4 (C-1'''), 95.8 (C-1'), 78.4, 78.0, 74.5, 74.5, 73.4, 73.1, 72.9, 72.7, 72.5, 72.1, 71.9, 71.6, 71.3, 70.3, 68.8, 68.5, 68.1, 67.9, 67.3, 66.3, 62.2, 54.1, 53.7, 52.5, 51.5, 51.2, 50.0, 49.9, 46.9, 46.0, 37.3 (CH<sub>2</sub>C=O), 32.2 (t, <sup>2</sup>J<sub>C,F</sub> = 21.6 Hz, CH<sub>2</sub>CF<sub>2</sub>), 29.0, 27.7 (CH<sub>2</sub>C=O), 26.3 ((CH<sub>3</sub>)<sub>3</sub>C), 25.7 (t, <sup>3</sup>J<sub>C,F</sub> = 5.0 Hz, CH<sub>2</sub>CH<sub>2</sub>CF<sub>2</sub>), 23.3, 22.3, 18.9 ((CH<sub>3</sub>)<sub>3</sub>C); HRMS (ESI-TOF) m/z [M – 2H]<sup>+2</sup> calcd for C<sub>125</sub>H<sub>131</sub>F<sub>16</sub>N<sub>3</sub>O<sub>28</sub>Si 1227.9294; Found 1227.9275.

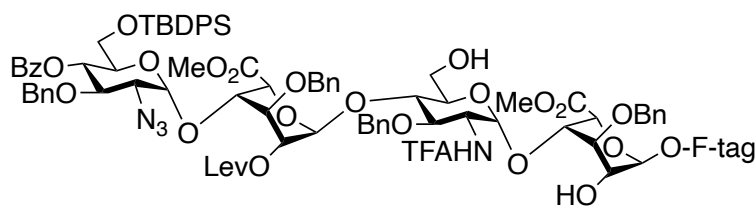

**78**

***N*-(Benzyl)-3,3,4,4,5,5,6,6,7,7,8,8,8-tridecafluorooctyl-benzoyloxycarbonyl-5-aminopentyl (2-azido-3-*O*-benzyl-4-*O*-benzoyl-2-deoxy-6-*O*-*tert*-butyldiphenylsilyl- $\alpha$ -D-glucopyranosyl)-(1 $\rightarrow$ 4)-(methyl 3-*O*-benzyl-2-*O*-levulinoyl- $\alpha$ -L-idopyranosyluronate)-(1 $\rightarrow$ 4)-(3-*O*-benzyl-2-deoxy-2-trifluoroacetamido- $\alpha$ -D-glucopyranosyl)-(1 $\rightarrow$ 4)-(methyl 3-*O*-benzyl- $\alpha$ -L-idopyranosyluronate (**78**)).**

Compound **75** (0.24 g, 0.097 mmol) was treated according to the general procedure for Nap deprotection to give tetrasaccharide **78** (0.20 g, 89%); *R*<sub>f</sub> 0.51 (2:3 hexanes/EtOAc); <sup>1</sup>H NMR (400 MHz, CD<sub>3</sub>COCD<sub>3</sub>):  $\delta$  8.55 (d, *J* = 8.9 Hz, 1H, NH), 8.07–8.05 (m, 2H, Ar), 7.73–7.68 (m, 3H, Ar), 7.62–7.54 (m, 4H, Ar), 7.49–7.17 (m, 30H, Ar), 7.12–7.03 (m, 5H, Ar), 5.63 (t, *J* = 9.6 Hz, 1H, H-4'''), 5.36 (d, *J* = 3.0 Hz, 1H, H-1''), 5.33 (d, *J* = 3.4 Hz, 1H, H-1'''), 5.17 (d, *J* = 3.4 Hz, 1H, H-1'), 5.13 (br, 2H, NCO<sub>2</sub>CH<sub>2</sub>), 5.07 (dd, *J* = 4.3, 3.0 Hz, 1H, H-2''), 4.97 (s, 1H, H-1), 4.89–4.77 (m, 6H, CH<sub>2</sub>Ph, H-5, H-5''), 4.72–4.62 (m, 3H, CH<sub>2</sub>Ph), 4.51 (s, 2H, NCH<sub>2</sub>Ph), 4.40 (d, *J* = 11.1 Hz, 1H, OCH<sub>2</sub>Ph), 4.23–4.16 (m, 4H), 4.10–3.98 (m, 4H), 3.92–3.83 (m, 4H), 3.80–3.64 (m, 9H), 3.50–3.40 (m, 1H, OCH<sub>2</sub>CH<sub>2</sub>), 3.36 (s, 3H, OCH<sub>3</sub>'), 3.26–3.19 (m, 2H, NCH<sub>2</sub>), 2.98–2.94 (m, 2H, PhCH<sub>2</sub>CH<sub>2</sub>), 2.87–2.82 (m, 2H, CH<sub>2</sub>), 2.76–2.51 (m, 4H, CH<sub>2</sub>, PhCH<sub>2</sub>CH<sub>2</sub>), 2.14 (s, 3H, CH<sub>3</sub>C=O), 1.63–1.53 (m,

4H, 2 X CH<sub>2</sub>), 1.40–1.27 (m, 2H, CH<sub>2</sub>), 1.00 (s, 9H, (CH<sub>3</sub>)<sub>3</sub>C); <sup>13</sup>C NMR (100 MHz, CD<sub>3</sub>COCD<sub>3</sub>): δ 205.8 (CH<sub>3</sub>C=OCH<sub>2</sub>), 171.9, 169.8, 168.7, 164.7, 157.0 (q, <sup>2</sup>J<sub>C,F</sub> = 37.0 Hz, CF<sub>3</sub>C=O), 138.9, 138.6, 138.5, 138.5, 138.0, 137.9, 135.6, 135.4, 133.4, 133.1, 133.0, 129.9, 129.7, 129.6, 129.6, 128.7, 128.5, 128.4, 128.4, 128.3, 128.2, 128.1, 128.1, 128.0, 127.7, 127.7, 127.6, 127.5, 127.4, 127.0, 126.8, 116.1 (q, <sup>1</sup>J<sub>C,F</sub> = 287 Hz, CF<sub>3</sub>), 101.2 (C-1), 97.7 (C-1''), 96.9 (C-1'''), 95.8 (C-1'), 78.2, 77.9, 74.3, 74.3, 73.8, 73.3, 72.8, 72.6, 72.4, 72.3, 71.6, 71.2, 70.4, 68.8, 68.7, 67.9, 67.4, 66.6, 66.3, 63.1, 62.1, 60.2, 53.6, 53.5, 51.6 (OCH<sub>3</sub>), 51.2 (OCH<sub>3</sub>''), 50.1, 49.8, 46.9, 46.1, 37.4 (CH<sub>2</sub>C=O), 32.1 (t, <sup>2</sup>J<sub>C,F</sub> = 21.6 Hz, CH<sub>2</sub>CF<sub>2</sub>), 29.2 (CH<sub>3</sub>C=O), 28.8 (CH<sub>2</sub>), 27.7 (CH<sub>2</sub>C=O), 26.3 ((CH<sub>3</sub>)<sub>3</sub>C), 25.7 (t, <sup>3</sup>J<sub>C,F</sub> = 5.0 Hz, CH<sub>2</sub>CH<sub>2</sub>CF<sub>2</sub>), 23.3 (CH<sub>2</sub>), 18.8 ((CH<sub>3</sub>)<sub>3</sub>C); HRMS (ESI-TOF) m/z [M + Na]<sup>+</sup> calcd for C<sub>112</sub>H<sub>119</sub>F<sub>16</sub>N<sub>5</sub>O<sub>27</sub>SiNa 2320.7505; Found 2320.7500.

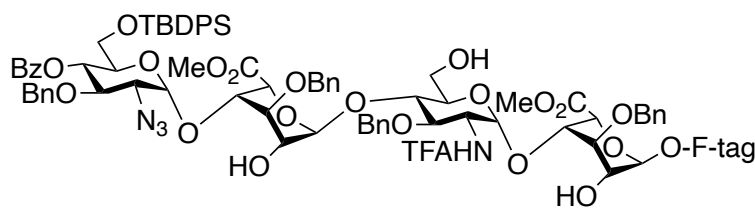

**79**

***N*-(Benzyl)-3,3,4,4,5,5,6,6,7,7,8,8,8-tridecafluorooctyl-benzoyloxycarbonyl-5-aminopentyl (2-azido-3-*O*-benzyl-4-*O*-benzoyl-2-deoxy-6-*O*-*tert*-butyldiphenylsilyl- $\alpha$ -D-glucopyranosyl)-(1 $\rightarrow$ 4)-(methyl 3-*O*-benzyl- $\alpha$ -L-idopyranosyluronate)-(1 $\rightarrow$ 4)-(3-*O*-benzyl-2-deoxy-2-trifluoroacetamido- $\alpha$ -D-glucopyranosyl)-(1 $\rightarrow$ 4)-(methyl 3-*O*-benzyl- $\alpha$ -L-idopyranosyluronate (79).**

Compound **78** (0.13 g, 0.097 mmol) was treated according to the general procedure for Lev deprotection to give tetrasaccharide **79** (0.12 g, 96%); *R*<sub>f</sub> 0.64 (2:3 hexanes/EtOAc); <sup>1</sup>H NMR (400 MHz, CD<sub>3</sub>COCD<sub>3</sub>): δ 8.55 (d, *J* = 9.0 Hz, 1H, NH), 8.07–8.05 (m, 2H, Ar), 7.73–7.68 (m, 3H, Ar), 7.62–7.50 (m, 6H, Ar), 7.46–7.15 (m, 28H, Ar), 7.10–7.03 (m, 5H, Ar), 5.58 (t, *J* = 9.6 Hz, 1H, H-4'''), 5.42 (d, *J* = 3.6 Hz, 1H, H-1'''), 5.38 (d, *J* = 3.7 Hz, 1H, H-1''), 5.17 (d, *J* = 3.5 Hz, 1H, H-1'), 5.14 (br, 2H, NCO<sub>2</sub>CH<sub>2</sub>), 4.96 (s, 1H, H-1), 4.95 (d,

$J = 12.5$  Hz, 1H, OCH<sub>2</sub>Ph), 4.85 (d,  $J = 1.5$  Hz, 1H, H-5), 4.83–4.75 (m, 4H, CH<sub>2</sub>Ph, H-5"), 4.70 (d,  $J = 11.5$  Hz, 1H, OCH<sub>2</sub>Ph), 4.65–4.61 (m, 2H, CH<sub>2</sub>Ph), 4.50 (s, 2H, NCH<sub>2</sub>Ph), 4.40–4.33 (m, 2H, OCH<sub>2</sub>Ph), 4.25–4.14 (m, 3H), 4.11–3.87 (m, 10H), 3.84–3.65 (m, 10H), 3.50–3.40 (m, 1H, OCH<sub>2</sub>CH<sub>2</sub>), 3.36 (s, 3H, OCH<sub>3</sub>"'), 3.26–3.19 (m, 2H, NCH<sub>2</sub>), 2.98–2.94 (m, 2H, PhCH<sub>2</sub>CH<sub>2</sub>), 2.61–2.48 (m, 2H, PhCH<sub>2</sub>CH<sub>2</sub>), 1.63–1.53 (m, 4H, 2 X CH<sub>2</sub>), 1.40–1.27 (m, 2H, CH<sub>2</sub>), 1.01 (s, 9H, (CH<sub>3</sub>)<sub>3</sub>C); <sup>13</sup>C NMR (100 MHz, CD<sub>3</sub>COCD<sub>3</sub>): δ 169.7, 169.1, 167.8, 164.7, 157.0 (q, <sup>2</sup> $J_{C,F} = 37.0$  Hz, CF<sub>3</sub>C=O), 139.0, 138.7, 138.6, 138.5, 138.5, 137.8, 135.6, 135.4, 133.5, 133.1, 133.0, 129.9, 129.7, 129.7, 129.6, 128.8, 128.5, 128.4, 128.4, 128.2, 128.2, 128.1, 127.7, 127.7, 127.7, 127.6, 127.5, 127.5, 126.9, 126.7, 116.1 (q, <sup>1</sup> $J_{C,F} = 287$  Hz, CF<sub>3</sub>), 101.3 (C-1), 101.1 (C-1''), 96.2 (C-1'''), 95.8 (C-1'), 78.4, 78.3, 75.5, 75.1, 74.6, 74.3, 73.6, 72.9, 72.3, 71.5, 71.2, 70.4, 69.4, 69.4, 67.9, 67.1, 66.3, 63.2, 62.2, 60.4, 53.6, 53.5, 51.6 (OCH<sub>3</sub>), 51.2 (OCH<sub>3</sub>"'), 50.1, 49.8, 46.9, 46.1, 32.2 (t, <sup>2</sup> $J_{C,F} = 21.6$  Hz, CH<sub>2</sub>CF<sub>2</sub>), 29.2 (CH<sub>3</sub>C=O), 27.7 (CH<sub>2</sub>), 26.3 ((CH<sub>3</sub>)<sub>3</sub>C), 25.7 (t, <sup>3</sup> $J_{C,F} = 5.0$  Hz, CH<sub>2</sub>CH<sub>2</sub>CF<sub>2</sub>), 23.3 (CH<sub>2</sub>), 18.9 ((CH<sub>3</sub>)<sub>3</sub>C); HRMS (ESI-TOF)  $m/z$  [M + H]<sup>+</sup> calcd for C<sub>107</sub>H<sub>113</sub>F<sub>16</sub>N<sub>5</sub>O<sub>25</sub>Si 2200.7317; Found 2200.7336.

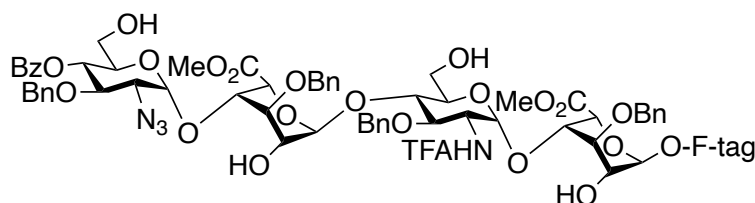

**80**

***N*-(Benzyl)-3,3,4,4,5,5,6,6,7,7,8,8,8-tridecafluorooctyl-benzyloxycarbonyl-5-aminopentyl (2-azido-3-*O*-benzyl-4-*O*-benzoyl-2-deoxy- $\alpha$ -D-glucopyranosyl)-(1→4)-(methyl 3-*O*-benzyl- $\alpha$ -L-idopyranosyluronate)-(1→4)-(3-*O*-benzyl-2-deoxy-2-trifluoroacetamido- $\alpha$ -D-glucopyranosyl)-(1→4)-(methyl 3-*O*-benzyl- $\alpha$ -L-idopyranosyluronate (**80**).**

Compound **79** (25 mg, 0.011 mmol) was treated according to the general procedure for TBDPS deprotection to give tetrasaccharide **80** (21 mg, 93%);  $R_f$  0.29 (2:3

hexanes/EtOAc);  $^1\text{H}$  NMR (400 MHz,  $\text{CD}_3\text{COCD}_3$ ):  $\delta$  8.57 (d,  $J = 9.3$  Hz, 1H, NH), 8.07–8.05 (m, 2H, Ar), 7.69–7.66 (m, 1H, Ar), 7.57–7.51 (m, 4H, Ar), 7.46–7.15 (m, 27H, Ar), 5.40 (d,  $J = 3.8$  Hz, 1H, H-1''), 5.37 (d,  $J = 3.6$  Hz, 1H, H-1'''), 5.29 (t,  $J = 9.8$  Hz, 1H, H-4'''), 5.17 (d,  $J = 3.6$  Hz, 1H, H-1'), 5.14 (br, 2H,  $\text{NCO}_2\text{CH}_2$ ), 4.97 (s, 1H, H-1), 4.95 (d,  $J = 11.1$  Hz, 1H,  $\text{OCH}_2\text{Ph}$ ), 4.86–4.73 (m, 7H,  $\text{CH}_2\text{Ph}$ , H-5'', H-5), 4.64–4.62 (m, 2H,  $\text{CH}_2\text{Ph}$ ), 4.50 (s, 2H,  $\text{NCH}_2\text{Ph}$ ), 4.41–4.38 (m, 2H), 4.24–4.16 (m, 3H), 4.09–3.83 (m, 9H), 3.82–3.56 (m, 10H), 3.49 (s, 3H,  $\text{OCH}_3$ ), 3.47–3.40 (m, 1H,  $\text{OCH}_2\text{CH}_2$ ), 3.26–3.19 (m, 2H,  $\text{NCH}_2$ ), 2.98–2.94 (m, 2H,  $\text{PhCH}_2\text{CH}_2$ ), 2.61–2.48 (m, 2H,  $\text{PhCH}_2\text{CH}_2$ ), 1.63–1.53 (m, 4H, 2 X  $\text{CH}_2$ ), 1.40–1.27 (m, 2H,  $\text{CH}_2$ );  $^{13}\text{C}$  NMR (100 MHz,  $\text{CD}_3\text{COCD}_3$ ):  $\delta$  169.7, 169.3, 165.1, 157.0 (q,  $^2J_{\text{C},\text{F}} = 37.0$  Hz,  $\text{CF}_3\text{C}=\text{O}$ ), 139.0, 138.7, 138.6, 138.5, 138.5, 137.8, 133.5, 129.7, 129.6, 128.8, 128.5, 128.4, 128.4, 128.3, 128.2, 128.1, 127.9, 127.8, 127.6, 127.6, 127.5, 127.5, 127.2, 126.9, 116.1 (q,  $^1J_{\text{C},\text{F}} = 287$  Hz,  $\text{CF}_3$ ), 101.3 (C-1), 101.0 (C-1''), 96.4 (C-1'''), 95.8 (C-1'), 78.4, 78.1, 75.9, 75.1, 74.6, 74.4, 73.6, 73.0, 72.9, 72.3, 71.5, 71.4, 71.0, 69.7, 69.5, 67.9, 67.1, 66.3, 63.2, 60.7, 60.3, 59.7, 54.1, 53.6, 53.5, 51.6, 51.3, 46.9, 46.1, 32.1 (t,  $^2J_{\text{C},\text{F}} = 21.6$  Hz,  $\text{CH}_2\text{CF}_2$ ), 29.1, 27.7, 25.7 (t,  $^3J_{\text{C},\text{F}} = 5.0$  Hz,  $\text{CH}_2\text{CH}_2\text{CF}_2$ ), 23.3; HRMS (ESI-TOF)  $m/z$   $[\text{M} + \text{H}]^+$  calcd for  $\text{C}_{91}\text{H}_{95}\text{F}_{16}\text{N}_5\text{O}_{25}$  1962.6139; Found 1962.6141.

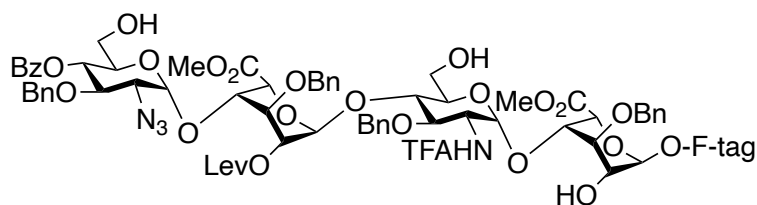

**81**

***N*-(Benzyl)-3,3,4,4,5,5,6,6,7,7,8,8,8-tridecafluorooctyl-benzoyloxycarbonyl-5-aminopentyl (2-azido-3-*O*-benzyl-4-*O*-benzoyl-2-deoxy- $\alpha$ -D-glucopyranosyl)-(1 $\rightarrow$ 4)-(methyl 3-*O*-benzyl-2-*O*-levulinoyl- $\alpha$ -L-idopyranosyluronate)-(1 $\rightarrow$ 4)-(3-*O*-benzyl-2-deoxy-2-trifluoroacetamido- $\alpha$ -D-glucopyranosyl)-(1 $\rightarrow$ 4)-(methyl 3-*O*-benzyl- $\alpha$ -L-idopyranosyluronate (81).**

Compound **78** (31 mg, 0.013 mmol) was treated according to the general procedure for TBDPS deprotection to give tetrasaccharide **81** (26 mg, 92%);  $R_f$  0.20 (2:3 hexanes/EtOAc);  $^1\text{H NMR}$  (400 MHz,  $\text{CD}_3\text{COCD}_3$ ):  $\delta$  8.58 (d,  $J = 9.3$  Hz, 1H, NH), 8.07–8.05 (m, 2H, Ar), 7.76–7.73 (m, 4H, Ar), 7.69–7.65 (m, 1H, Ar), 7.56–7.43 (m, 12H, Ar), 7.38–7.17 (m, 15H, Ar), 5.39 (d,  $J = 3.3$  Hz, 1H, H-1''), 5.31 (dd,  $J = 10.1, 9.4$  Hz, 1H, H-4'''), 5.26 (d,  $J = 3.5$  Hz, 1H, H-1'''), 5.18 (d,  $J = 3.5$  Hz, 1H, H-1'), 5.15 (br, 2H,  $\text{NCO}_2\text{CH}_2$ ), 5.06 (dd,  $J = 3.8, 3.0$  Hz, 1H, H-2''), 4.98 (s, 1H, H-1), 4.89–4.73 (m, 8H,  $\text{CH}_2\text{Ph}$ , OH, H-5, H-5''), 4.69–4.62 (m, 2H,  $\text{CH}_2\text{Ph}$ ), 4.51 (s, 2H,  $\text{NCH}_2\text{Ph}$ ), 4.42 (d,  $J = 11.0$  Hz, 1H,  $\text{OCH}_2\text{Ph}$ ), 4.23–4.15 (m, 4H), 4.09 (dd,  $J = 10.1, 9.3$  Hz, 1H), 4.04 (t,  $J = 9.5$  Hz, 1H), 3.99–3.94 (m, 2H), 3.94–3.84 (m, 3H), 3.82–3.57 (m, 9H), 3.52 (s, 3H,  $\text{OCH}_3$ ), 3.50–3.40 (m, 1H,  $\text{OCH}_2\text{CH}_2$ ), 3.26–3.19 (m, 2H,  $\text{NCH}_2$ ), 2.98–2.94 (m, 2H,  $\text{PhCH}_2\text{CH}_2$ ), 2.87–2.82 (m, 2H,  $\text{CH}_2$ ), 2.76–2.66 (m, 2H,  $\text{CH}_2$ ), 2.60–2.47 (m, 2H,  $\text{PhCH}_2\text{CH}_2$ ), 2.14 (s, 3H,  $\text{CH}_3\text{C}=\text{O}$ ), 1.63–1.53 (m, 4H, 2 X  $\text{CH}_2$ ), 1.40–1.27 (m, 2H,  $\text{CH}_2$ );  $^{13}\text{C NMR}$  (100 MHz,  $\text{CD}_3\text{COCD}_3$ ):  $\delta$  205.9 ( $\text{CH}_3\text{C}=\text{OCH}_2$ ), 171.9, 169.9, 169.0, 165.2, 157.0 (q,  $^2J_{\text{C},\text{F}} = 37.0$  Hz,  $\text{CF}_3\text{C}=\text{O}$ ), 139.0, 138.6, 138.5, 138.5, 138.0, 137.9, 134.3, 134.2, 133.5, 132.5, 132.4, 130.5, 129.7, 129.6, 128.8, 128.5, 128.5, 128.4, 128.3, 128.2, 128.1, 128.1, 127.9, 127.8, 127.8, 127.5, 127.5, 127.5, 127.3, 126.9, 116.1 (q,  $^1J_{\text{C},\text{F}} = 287$  Hz,  $\text{CF}_3$ ), 101.2 (C-1), 97.7 (C-1''), 97.3 (C-1'''), 95.8 (C-1'), 78.1, 77.7, 74.5, 74.3, 74.0, 73.0, 72.8, 72.8, 72.3, 71.6, 71.5, 71.2, 69.1, 69.0, 67.9, 67.4, 66.7, 66.3, 63.1, 60.7, 60.1, 53.6, 51.6 ( $\text{OCH}_3$ ), 51.3 ( $\text{OCH}_3$ ), 50.1, 49.8, 46.9, 46.1, 37.4 ( $\text{CH}_2\text{C}=\text{O}$ ), 32.2 (t,  $^2J_{\text{C},\text{F}} = 21.6$  Hz,  $\text{CH}_2\text{CF}_2$ ), 27.8, 25.7 ( $\text{CH}_2\text{C}=\text{O}$ ), 25.4, 23.3; HRMS (ESI-TOF)  $m/z$   $[\text{M} + \text{Na}]^+$  calcd for  $\text{C}_{96}\text{H}_{101}\text{F}_{16}\text{N}_5\text{O}_{27}\text{Na}$  2082.6326; Found 2082.6340.

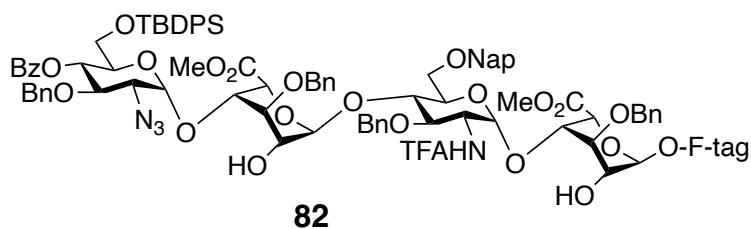

***N*-(Benzyl)-3,3,4,4,5,5,6,6,7,7,8,8,8-tridecafluorooctyl-benzyloxycarbonyl-5-aminopentyl (2-azido-3-*O*-benzyl-4-*O*-benzoyl-2-deoxy-6-*O*-*tert*-butyldiphenylsilyl- $\alpha$ -D-glucopyranosyl)-(1 $\rightarrow$ 4)-(methyl 3-*O*-benzyl- $\alpha$ -L-idopyranosyluronate)-(1 $\rightarrow$ 4)-(3-*O*-benzyl-2-deoxy-6-*O*-2-naphthylmethyl-2-trifluoroacetamido- $\alpha$ -D-glucopyranosyl)-(1 $\rightarrow$ 4)-(methyl 3-*O*-benzyl- $\alpha$ -L-idopyranosyluronate (**82**)).**

Compound **75** (80 mg, 0.033 mmol) was treated according to the general procedure for Lev deprotection to give tetrasaccharide **82** (73 mg, 95%);  $R_f$  0.33 (2:1 hexanes–EtOAc);  $^1\text{H}$  NMR (400 MHz,  $\text{CD}_3\text{COCD}_3$ ):  $\delta$  8.46 (d,  $J = 9.1$  Hz, 1H, NH), 8.11–7.85 (m, 6H, ArH), 7.79–7.00 (m, 40H, ArH), 5.63 (app t,  $J = 9.7$  Hz, 1H, H-4'''), 5.47–5.44 (m, 2H, H-1'', H-1'''), 5.22 (d,  $J = 3.4$  Hz, 1H, H-1'), 5.20–5.12 (m, 2H,  $\text{NCO}_2\text{CH}_2$ ), 5.01–4.70 (m, 11H), 4.69–4.59 (m, 2H), 4.52 (bs, 2H,  $\text{NCH}_2\text{Ph}$ ), 4.42 (d,  $J = 11.4$  Hz, 1H,  $\text{ArCH}_2$ ), 4.33 (d,  $J = 8.7$  Hz, 1H), 4.31–4.20 (m, 2H), 4.19–3.99 (m, 7H), 3.98–3.92 (m, 2H), 3.88–3.66 (m, 11H), 3.52–3.41 (m, 1H,  $\text{OCH}_2$ ), 3.37 (s, 3H,  $\text{COOCH}_3$ ), 3.30–3.18 (m, 2H,  $\text{NCH}_2$ ), 3.02–2.92 (m, 2H,  $\text{PhCH}_2\text{CH}_2$ ), 2.65–2.47 (m, 2H,  $\text{PhCH}_2\text{CH}_2$ ), 1.68–1.49 (m, 4H, 2 X  $\text{CH}_2$ ), 1.41–1.29 (m, 2H,  $\text{CH}_2$ ), 1.03 (s, 9H,  $(\text{CH}_3)_3\text{C}$ );  $^{13}\text{C}$  NMR (100 MHz,  $\text{CD}_3\text{COCD}_3$ ):  $\delta$  170.9 (C=O), 170.5 (C=O), 170.1 (C=O), 165.5 (C=O), 158.0 157.8 (q,  $J = 36.5$  Hz,  $\text{COCF}_3$ ), 139.8, 139.53, 139.46, 139.4, 139.3, 138.6, 137.1, 136.5, 136.3, 134.4, 134.3, 133.94, 133.92, 133.8, 130.7, 130.6, 130.54, 130.46, 129.6, 129.34, 129.29, 129.27, 129.1, 129.03, 129.01, 128.9, 128.92, 128.90, 128.87, 128.59, 128.56, 128.52, 128.49, 128.46, 128.44, 128.36, 128.3, 128.0, 127.8, 127.6, 127.2, 126.9, 126.8, 126.6, 117.1 (q,  $J = 287$  Hz,  $\text{CF}_3$ ), 102.1 (C-1), 101.9 (C-1''), 97.2 (C-1'''), 96.6 (C-1'), 79.3, 79.2, 76.6, 76.5, 75.4, 75.1, 74.5, 74.1, 73.8, 73.7, 73.4, 72.8, 72.4, 72.0, 71.2 (C-4'''), 70.4, 70.4, 69.4, 68.7 ( $\text{OCH}_2$ ), 68.0, 67.2 ( $\text{NCOCH}_2$ ), 64.1, 63.0, 60.5, 54.4, 52.4 ( $\text{COOCH}_3$ ), 52.1 ( $\text{COOCH}_3$ ), 50.9, 50.7, 47.8, 46.9, 33.0 (t,  $^2J_{\text{C,F}} = 21.4$  Hz,  $\text{CH}_2\text{CF}_2$ ), 30.4, 30.3, 30.2, 30.1, 30.0, 29.9, 29.8, 29.6, 29.5, 29.3, 27.1 ( $(\text{CH}_3)_3\text{C}$ ), 26.6 (t,  $^3J_{\text{C,F}} = 4.0$  Hz,  $\text{CH}_2\text{CH}_2\text{CF}_2$ ), 24.2, 19.7 ( $(\text{CH}_3)_3\text{C}$ ); HRMS (ESI-TOF)  $m/z$   $[\text{M} + \text{H}]^+$  calcd for  $\text{C}_{118}\text{H}_{121}\text{F}_{16}\text{N}_5\text{O}_{25}\text{Si}$  2340.7942; Found 2340.7953.

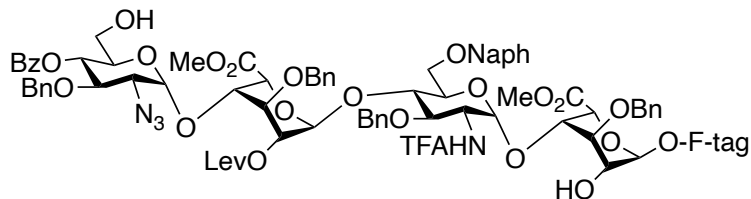

83

***N*-(Benzyl)-3,3,4,4,5,5,6,6,7,7,8,8,8-tridecafluorooctyl-benzoyloxycarbonyl-5-aminopentyl (2-azido-3-*O*-benzyl-4-*O*-benzoyl-2-deoxy- $\alpha$ -D-glucopyranosyl)-(1 $\rightarrow$ 4)-(methyl 3-*O*-benzyl-2-*O*-levulinoyl- $\alpha$ -L-idopyranosyluronate)-(1 $\rightarrow$ 4)-(3-*O*-benzyl-2-deoxy-6-*O*-2-naphthylmethyl-2-trifluoroacetamido- $\alpha$ -D-glucopyranosyl)-(1 $\rightarrow$ 4)-(methyl 3-*O*-benzyl- $\alpha$ -L-idopyranosyluronate (83).**

Compound **75** (170 mg, 0.070 mmol) was treated according to the general procedure for TBDPS deprotection to give tetrasaccharide **83** (150 mg, 98%);  $R_f$  0.50 (1:1 hexanes–EtOAc);  $^1\text{H NMR}$  (400 MHz,  $\text{CD}_3\text{COCD}_3$ ):  $\delta$  8.52 (d,  $J = 9.3$  Hz, 1H, NH), 8.07–8.03 (m, 2H, ArH), 8.03–7.96 (m, 2H, ArH), 7.94–7.90 (m, 1H, ArH), 7.89–7.83 (m, 1H, ArH), 7.71–7.65 (m, 2H, ArH), 7.57–7.43 (m, 8H, ArH), 7.41–7.15 (m, 20H, ArH), 5.47 (d,  $J = 3.6$  Hz, 1H, H-1''), 5.33 (app t,  $J = 9.6$  Hz, 1H, H-4'''), 5.30 (d,  $J = 3.6$  Hz, 1H, H-1'''), 5.23 (d,  $J = 3.5$  Hz, 1H, H-1'), 5.20–5.12 (m, 2H,  $\text{NCO}_2\text{CH}_2$ ), 5.01 (app t,  $J = 3.6$  Hz, 1H, H-2''), 5.00 (bs, 1H, H-1), 4.94–4.74 (m, 10H), 4.70–4.63 (m, 2H), 4.52 (bs, 2H,  $\text{NCH}_2\text{Ph}$ ), 4.44 (d,  $J = 11.4$  Hz, 1H,  $\text{ArCH}_2$ ), 4.31–3.97 (m, 10H), 3.96–3.91 (m, 1H), 3.86–3.66 (m, 9H), 3.64–3.53 (m, 5H, H-2''',  $\text{OCH}_2$ ,  $\text{COOCH}_3$ ), 3.52–3.40 (m, 1H,  $\text{OCH}_2$ ), 3.30–3.16 (m, 2H,  $\text{NCH}_2$ ), 3.02–2.93 (m, 2H,  $\text{PhCH}_2\text{CH}_2$ ), 2.77–2.68 (m, 2H,  $\text{CH}_3\text{COCH}_2\text{CH}_2$ ), 2.65–2.46 (m, 4H,  $\text{CH}_3\text{COCH}_2\text{CH}_2$ ,  $\text{PhCH}_2\text{CH}_2$ ), 2.08 (s, 3H,  $\text{CH}_3\text{COCH}_2\text{CH}_2$ ), 1.69–1.50 (m, 4H, 2 X  $\text{CH}_2$ ), 1.43–1.25 (m, 2H,  $\text{CH}_2$ );  $^{13}\text{C NMR}$  (100 MHz,  $\text{CD}_3\text{COCD}_3$ ):  $\delta$  206.4 ( $\text{CH}_3\text{C}=\text{O}$ ), 172.7 ( $\text{C}=\text{O}$ ), 170.8 ( $\text{C}=\text{O}$ ), 169.9 ( $\text{C}=\text{O}$ ), 166.0 ( $\text{C}=\text{O}$ ), 157.8 (q,  $J = 36.5$  Hz,  $\text{COCF}_3$ ), 139.8, 139.5, 139.4, 138.9, 138.7, 137.0, 134.4, 134.3, 133.9, 130.5, 130.4, 129.6, 129.34, 129.31, 129.29, 129.1, 129.03, 129.00, 128.9, 128.8, 128.74, 128.68, 128.6, 128.44, 128.39, 128.33, 128.30, 128.2, 128.0, 127.8, 127.3, 127.0, 126.8, 126.6, 117.0 (q,  $J = 288$  Hz,  $\text{CF}_3$ ), 102.0 (C-1), 98.6 (C-1''), 98.2 (C-1'''), 96.6 (C-1'), 79.2, 78.4, 75.8, 75.4,



75.1, 75.1, 74.7, 73.9, 73.8, 73.5, 73.2, 72.6, 72.5, 72.4, 72.0 (C-4'''), 70.2 (C-2''), 69.9, 68.9, 68.8 (OCH<sub>2</sub>), 68.3, 67.6, 67.2 (NCOCH<sub>2</sub>), 63.8, 61.6, 60.5, 55.0, 54.4, 52.4 (COOCH<sub>3</sub>), 52.2 (COOCH<sub>3</sub>), 50.9, 47.8, 46.9, 38.2, 33.0 (t, <sup>2</sup>J<sub>C,F</sub> = 21.4 Hz, CH<sub>2</sub>CF<sub>2</sub>), 28.6, 26.6 (t, <sup>3</sup>J<sub>C,F</sub> = 4.0 Hz, CH<sub>2</sub>CH<sub>2</sub>CF<sub>2</sub>), 24.2 (CH<sub>2</sub>); HRMS (ESI-TOF) m/z [M + Na]<sup>+</sup> calcd for C<sub>107</sub>H<sub>109</sub>F<sub>16</sub>N<sub>5</sub>O<sub>27</sub>Na 2222.6953; Found 2222.6968.

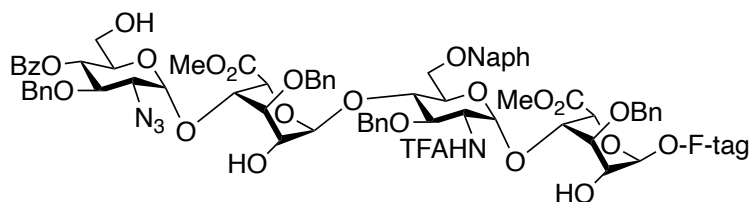

**84**

***N*-(Benzyl)-3,3,4,4,5,5,6,6,7,7,8,8,8-tridecafluorooctyl-benzoyloxycarbonyl-5-aminopentyl (2-azido-3-*O*-benzyl-4-*O*-benzoyl-2-deoxy- $\alpha$ -D-glucopyranosyl)-(1 $\rightarrow$ 4)-(methyl 3-*O*-benzyl- $\alpha$ -L-idopyranosyluronate)-(1 $\rightarrow$ 4)-(3-*O*-benzyl-2-deoxy-6-*O*-2-naphthylmethyl-2-trifluoroacetamido- $\alpha$ -D-glucopyranosyl)-(1 $\rightarrow$ 4)-(methyl 3-*O*-benzyl- $\alpha$ -L-idopyranosyluronate (**84**)).**

Compound **83** (75 mg, 0.074 mmol) was treated according to the general procedure of Lev deprotection to give tetrasaccharide **84** (69 mg, 96%); *R*<sub>f</sub> 0.52 (1:1 hexanes–EtOAc); <sup>1</sup>H NMR (400 MHz, CD<sub>3</sub>COCD<sub>3</sub>):  $\delta$  8.51 (d, *J* = 9.8 Hz, 1H, NH), 8.11–7.86 (m, 6H, ArH), 7.72–7.63 (m, 2H, ArH), 7.60–7.18 (m, 28H, ArH), 5.48 (d, *J* = 4.0 Hz, 1H, H-1'''), 5.40 (d, *J* = 3.5 Hz, 1H, H-1'''), 5.32 (app t, *J* = 9.3 Hz, 1H, H-4'''), 5.23 (d, *J* = 3.4 Hz, 1H, H-1'), 5.20–5.12 (m, 2H, NCO<sub>2</sub>CH<sub>2</sub>), 4.99 (bs, 1H, H-1), 4.94 (d, *J* = 10.3 Hz, 1H, ArCH<sub>2</sub>), 4.91–4.71 (m, 8H), 4.68–4.62 (m, 2H), 4.52 (bs, 2H, NCH<sub>2</sub>Ph), 4.42 (d, *J* = 11.1 Hz, 1H, ArCH<sub>2</sub>), 4.32–4.08 (m, 6H), 4.08–3.99 (m, 2H), 3.98–3.94 (m, 1H), 3.91 (ddd, *J* = 9.3, 4.7, 2.5 Hz, 1H, H-5'''), 3.86–3.71 (m, 9H), 3.66–3.60 (m, 2H, H-6'''), 3.54–3.39 (m, 4H, COOCH<sub>3</sub>, OCH<sub>2</sub>), 3.29–3.15 (m, 2H, NCH<sub>2</sub>), 3.01–2.93 (m, 2H, PhCH<sub>2</sub>CH<sub>2</sub>), 2.62–2.46 (m, 2H, PhCH<sub>2</sub>CH<sub>2</sub>), 2.08 (s, 3H, CH<sub>3</sub>COCH<sub>2</sub>CH<sub>2</sub>), 1.67–1.49 (m, 4H, 2 X CH<sub>2</sub>), 1.42–1.24 (m, 2H, CH<sub>2</sub>); <sup>13</sup>C NMR (100 MHz, CD<sub>3</sub>COCD<sub>3</sub>):  $\delta$  170.5 (C=O), 170.3 (C=O), 166.0 (C=O),

157.8 (q,  $J = 36.7$  Hz, COCF<sub>3</sub>), 139.8, 139.5, 139.44, 139.43, 139.3, 138.6, 137.1, 134.4, 133.9, 130.5, 130.4, 129.6, 129.33, 129.29, 129.2, 129.1, 129.03, 129.01, 128.91, 128.88, 128.77, 128.75, 128.7, 128.54, 128.46, 128.42, 128.36, 128.3, 128.2, 128.0, 127.8, 127.2, 126.9, 126.8, 126.6, 117.0 (q,  $J = 288$  Hz, CF<sub>3</sub>), 102.1 (C-1), 101.9 (C-1''), 97.4 (C-1'''), 96.6 (C-1'), 79.3, 78.9, 77.1, 76.6, 75.4, 75.2, 74.1, 74.0, 73.8, 73.3, 72.8, 72.4 (C-5'''), 72.3, 71.9 (C-4'''), 70.7, 70.6, 69.3, 68.7 (OCH<sub>2</sub>), 68.0, 67.2 (NCOCH<sub>2</sub>), 64.0 (C-2'''), 61.6 (C-6'''), 55.4, 54.4, 52.4 (COOCH<sub>3</sub>), 52.2 (COOCH<sub>3</sub>), 50.9, 50.7, 47.8, 46.9, 33.0 (t,  $^2J_{C,F} = 21.4$  Hz, CH<sub>2</sub>CF<sub>2</sub>), 26.6 (t,  $^3J_{C,F} = 4.0$  Hz, CH<sub>2</sub>CH<sub>2</sub>CF<sub>2</sub>), 24.2 (CH<sub>2</sub>); HRMS (ESI-TOF)  $m/z$  [M-H + 2Na]<sup>+</sup> calcd for C<sub>102</sub>H<sub>102</sub>F<sub>16</sub>N<sub>5</sub>O<sub>25</sub>Na<sub>2</sub> 2146.6404; Found 2146.6406.

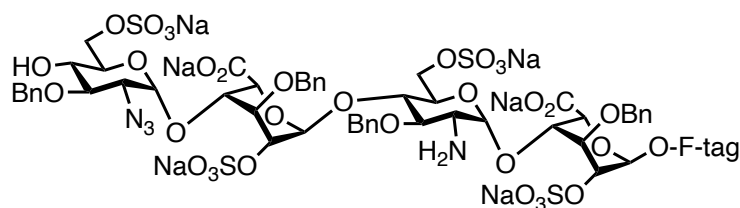

**85**

***N*-(Benzyl)-3,3,4,4,5,5,6,6,7,7,8,8,8-tridecafluorooctyl-benzoyloxycarbonyl-5-aminopentyl (2-azido-3-*O*-benzyl-4-*O*-benzoyl-2-deoxy-6-*O*-sulfonato- $\alpha$ -D-glucopyranosyl)-(1 $\rightarrow$ 4)-(methyl 3-*O*-benzyl-2-*O*-sulfonato- $\alpha$ -L-idopyranosyluronate)-(1 $\rightarrow$ 4)-(3-*O*-benzyl-2-deoxy-6-*O*-sulfonato-2-trifluoroacetamido- $\alpha$ -D-glucopyranosyl)-(1 $\rightarrow$ 4)-methyl-3-*O*-benzyl-2-*O*-sulfonato- $\alpha$ -L-idopyranosyluronate (85).**

Compound **S1** (77 mg, 0.033 mmol) was treated according to the general procedure for hydrolysis to give tetrasaccharide **85** (60 mg, 85%);  $R_f$  0.65 (8:5:3:1 EtOAc/pyridine/H<sub>2</sub>O/AcOH); <sup>1</sup>H NMR (400 MHz, CD<sub>3</sub>OD):  $\delta$  7.95–7.94 (m, 1H, Ar), 7.43–7.17 (m, 28H, Ar), 5.88 (s, 1H), 5.21–5.02 (m, 8H), 4.84–4.72 (m, 3H), 4.64–4.59 (m, 10H), 4.29–4.27 (m, 2H), 4.17–3.98 (m, 7H), 3.86 (t,  $J = 9.5$  Hz, 1H), 3.73–3.65 (m, 2H), 3.50–3.43 (m, 3H), 3.20–3.10 (m, 2H), 2.94–2.88 (m, 2H, PhCH<sub>2</sub>CH<sub>2</sub>), 2.71 (dd,  $J = 9.7, 2.9$  Hz, 1H), 2.49–2.36 (m, 2H, PhCH<sub>2</sub>CH<sub>2</sub>), 1.63–1.53 (m, 4H, 2 X CH<sub>2</sub>), 1.40–1.27 (m, 2H, CH<sub>2</sub>); <sup>13</sup>C NMR (100 MHz, CD<sub>3</sub>OD):  $\delta$  129.6, 128.8, 128.4, 127.6, 127.2, 98.9, 95.9, 94.4,

93.8, 80.6, 78.5, 77.6, 75.1, 74.9, 71.5, 71.4, 71.1, 70.3, 70.2, 69.9, 68.5, 68.2, 67.9, 67.8, 67.3, 67.1, 66.8, 63.9, 55.9, 49.9, 46.7, 32.2, 28.9, 27.4, 25.7, 22.9; HRMS (ESI-TOF)  $m/z$   $[M - 6Na + 5H]^+$  calcd for  $C_{80}H_{87}F_{13}N_5O_{35}S_4$  2052.3857; Found 2052.3872.

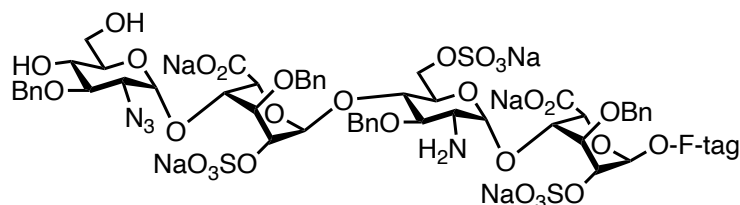

**86**

***N*-(Benzyl)-3,3,4,4,5,5,6,6,7,7,8,8,8-tridecafluorooctyl-benzyloxycarbonyl-5-aminopentyl (2-azido-3-*O*-benzyl-2-deoxy- $\alpha$ -D-glucopyranosyl)-(1 $\rightarrow$ 4)-(3-*O*-benzyl-2-*O*-sulfonato- $\alpha$ -L-idopyranosyluronate)-(1 $\rightarrow$ 4)-(2-amino-3-*O*-benzyl-2-deoxy-6-*O*-sulfonato- $\alpha$ -D-glucopyranosyl)-(1 $\rightarrow$ 4)-3-*O*-benzyl-2-*O*-sulfonato- $\alpha$ -L-idopyranosyluronate (**86**).**

Compound **S2** (71 mg, 0.028 mmol) was treated according to the general procedure for hydrolysis to give tetrasaccharide **86** (53 mg, 91%);  $R_f$  0.47 (12:5:3:1 EtOAc/pyridine/H<sub>2</sub>O/AcOH); <sup>1</sup>H NMR (400 MHz, CD<sub>3</sub>OD):  $\delta$  7.73–7.71 (m, 4H, Ar), 7.43–7.13 (m, 25H, Ar), 5.83 (s, 1H), 5.18–5.02 (m, 8H), 4.92–4.82 (m, 4H), 4.76–4.60 (m, 5H), 4.53–4.44 (m, 5H), 4.25–4.06 (m, 6H), 3.98–3.81 (m, 5H), 3.72–3.64 (m, 2H), 3.53–3.38 (m, 3H), 3.25–3.10 (m, 2H), 2.94–2.88 (m, 2H, PhCH<sub>2</sub>CH<sub>2</sub>), 2.74 (dd,  $J = 9.6, 3.2$  Hz, 1H), 2.50–2.36 (m, 2H, PhCH<sub>2</sub>CH<sub>2</sub>), 1.63–1.53 (m, 4H, 2 X CH<sub>2</sub>), 1.40–1.27 (m, 2H, CH<sub>2</sub>); <sup>13</sup>C NMR (100 MHz, CD<sub>3</sub>OD):  $\delta$  134.6, 128.2, 128.0, 127.4, 127.1, 99.0, 96.0, 94.2, 93.5, 80.8, 78.9, 76.3, 74.9, 72.6, 71.5, 71.3, 71.2, 71.1, 70.1, 70.0, 69.4, 68.3, 68.0, 67.9, 67.5, 67.3, 66.8, 63.8, 61.1, 55.9, 49.9, 46.5, 32.3, 28.9, 27.4, 25.7, 23.4; HRMS (ESI-TOF)  $m/z$   $[M - 5Na + 4H]^+$  calcd for  $C_{80}H_{87}F_{13}N_5O_{32}S_3$  1972.4288; Found 1972.4264.

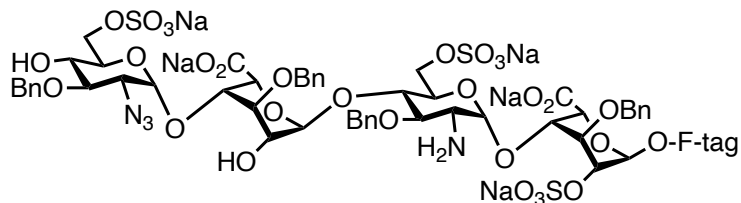

**87**

***N*-(Benzyl)-3,3,4,4,5,5,6,6,7,7,8,8,8-tridecafluorooctyl-benzoyloxycarbonyl-5-aminopentyl (2-azido-3-*O*-benzyl-4-*O*-benzoyl-2-deoxy-6-*O*-sulfonato- $\alpha$ -D-glucopyranosyl)-(1 $\rightarrow$ 4)-(methyl 3-*O*-benzyl- $\alpha$ -L-idopyranosyluronate)-(1 $\rightarrow$ 4)-(3-*O*-benzyl-2-deoxy-6-*O*-sulfonato-2-trifluoroacetamido- $\alpha$ -D-glucopyranosyl)-(1 $\rightarrow$ 4)-methyl-3-*O*-benzyl-2-*O*-sulfonato- $\alpha$ -L-idopyranosyluronate (87).**

Compound **S3** (73 mg, 0.031 mmol) was treated according to the general procedure for hydrolysis to give tetrasaccharide **87** (59 mg, 92%);  $R_f$  0.72 (8:5:3:1 EtOAc/pyridine/H<sub>2</sub>O/AcOH); <sup>1</sup>H NMR (400 MHz, CD<sub>3</sub>OD):  $\delta$  7.73–7.71 (m, 1H, Ar), 7.43–7.17 (m, 28H, Ar), 5.36 (s, 1H), 5.31 (d,  $J$  = 3.6 Hz, 1H), 5.15–5.03 (m, 6H), 4.78–4.56 (m, 8H), 4.51–4.43 (m, 3H), 4.39–4.08 (m, 9H), 4.02–3.98 (m, 1H), 3.92–3.67 (m, 5H), 3.50–3.41 (m, 2H), 3.30–3.26 (m, 1H), 3.20–3.10 (m, 2H), 2.94–2.90 (m, 2H, PhCH<sub>2</sub>CH<sub>2</sub>), 2.51–2.38 (m, 2H, PhCH<sub>2</sub>CH<sub>2</sub>), 1.63–1.53 (m, 4H, 2 X CH<sub>2</sub>), 1.40–1.27 (m, 2H, CH<sub>2</sub>); <sup>13</sup>C NMR (100 MHz, CD<sub>3</sub>OD):  $\delta$  134.6, 129.0, 128.4, 127.6, 127.2, 99.0, 98.8, 95.4, 90.6, 80.3, 76.3, 75.0, 74.8, 73.7, 73.1, 72.3, 71.4, 71.1, 70.3, 69.8, 69.6, 69.2, 68.9, 68.5, 67.6, 67.0, 66.8, 66.0, 63.5, 53.8, 49.9, 46.5, 32.2, 28.9, 27.4, 25.7, 23.2; HRMS (ESI-TOF)  $m/z$  [M -5Na + 4H]<sup>-</sup> calcd for C<sub>80</sub>H<sub>87</sub>F<sub>13</sub>N<sub>5</sub>O<sub>32</sub>S<sub>3</sub> 1972.4288; Found 1972.4282.

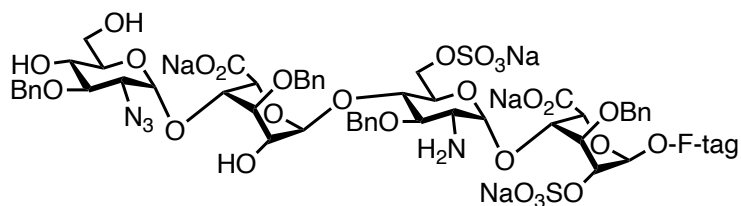

**88**

***N*-(Benzyl)-3,3,4,4,5,5,6,6,7,7,8,8,8-tridecafluorooctyl-benzoyloxycarbonyl-5-aminopentyl (2-azido-3-*O*-benzyl-4-*O*-benzoyl-2-deoxy- $\alpha$ -D-glucopyranosyl)-(1 $\rightarrow$ 4)-**

(methyl 3-*O*-benzyl- $\alpha$ -L-idopyranosyluronate)-(1 $\rightarrow$ 4)-(3-*O*-benzyl-2-deoxy-6-*O*-sulfonato-2-trifluoroacetamido- $\alpha$ -D-glucopyranosyl)-(1 $\rightarrow$ 4)-methyl-3-*O*-benzyl-2-*O*-sulfonato- $\alpha$ -L-idopyranosyluronate (**88**).

Compound **S4** (72 mg, 0.029 mmol) was treated according to the general procedure for hydrolysis to give tetrasaccharide **88** (55 mg, 96%);  $R_f$  0.55 (12:5:3:1 EtOAc/pyridine/H<sub>2</sub>O/AcOH); <sup>1</sup>H NMR (400 MHz, CD<sub>3</sub>OD):  $\delta$  7.73–7.71 (m, 3H, Ar), 7.41–7.17 (m, 26H, Ar), 5.35 (d,  $J$  = 2.5 Hz, 1H), 5.14–5.01 (m, 7H), 4.81–4.71 (m, 4H), 4.68–4.55 (m, 4H), 4.49–4.45 (m, 3H), 4.38–4.13 (m, 6H), 4.00–3.67 (m, 9H), 3.53–3.43 (m, 3H), 3.30–3.26 (m, 1H), 3.20–3.10 (m, 2H), 2.94–2.90 (m, 2H, PhCH<sub>2</sub>CH<sub>2</sub>), 2.86 (dd,  $J$  = 9.9, 3.5 Hz, 1H), 2.51–2.38 (m, 2H, PhCH<sub>2</sub>CH<sub>2</sub>), 1.63–1.53 (m, 4H, 2 X CH<sub>2</sub>), 1.40–1.27 (m, 2H, CH<sub>2</sub>); <sup>13</sup>C NMR (100 MHz, CD<sub>3</sub>OD):  $\delta$  134.6, 129.0, 128.4, 127.6, 127.2, 99.3, 98.9, 95.4, 94.8, 81.1, 80.9, 74.9, 74.7, 74.6, 74.2, 72.7, 72.5, 71.7, 71.6, 71.2, 70.5, 70.4, 70.0, 69.9, 69.8, 68.6, 67.7, 67.4, 66.7, 66.5, 63.7, 55.2, 50.0, 46.5, 32.2, 28.9, 27.4, 25.7, 23.2; HRMS (ESI-TOF)  $m/z$  [M -4Na + 3H]<sup>-</sup> calcd for C<sub>80</sub>H<sub>87</sub>F<sub>13</sub>N<sub>5</sub>O<sub>29</sub>S<sub>2</sub> 1892.4720; Found 1892.4717.

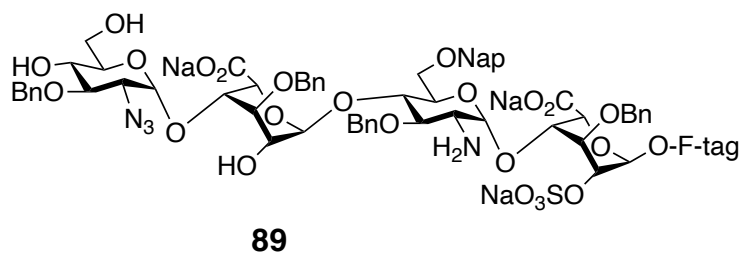

*N*-(Benzyl)-3,3,4,4,5,5,6,6,7,7,8,8,8-tridecafluorooctyl-benzoyloxycarbonyl-5-aminopentyl (2-azido-3-*O*-benzyl-2-deoxy- $\alpha$ -D-glucopyranosyl)-(1 $\rightarrow$ 4)-(3-*O*-benzyl- $\alpha$ -L-idopyranosyluronate)-(1 $\rightarrow$ 4)-(2-amino-3-*O*-benzyl-2-deoxy-6-*O*-2-naphthylmethyl- $\alpha$ -D-glucopyranosyl)-(1 $\rightarrow$ 4)-3-*O*-benzyl-2-*O*-sulfonato- $\alpha$ -L-idopyranosyluronate trisodium salt (**89**).

Compound **S5** (70 mg, 0.028 mmol) was treated according to the general procedure for hydrolysis to give tetrasaccharide **89** (51 mg, 91%);  $R_f$  0.65 (7:2:1, EtOAc–CH<sub>3</sub>OH–H<sub>2</sub>O);

$^1\text{H}$  NMR (400 MHz,  $\text{CD}_3\text{OD}$ ):  $\delta$  7.88–7.08 (m, 36H, ArH), 5.38 (d,  $J = 2.9$  Hz, 1H, H-1''), 5.14–5.01 (m, 6H, H-1', H-1''',  $\text{NCO}_2\text{CH}_2$ , H-1,  $\text{ArCH}_2$ ), 4.94 (m, 1H,  $\text{ArCH}_2$ ), 4.80–4.54 (m, 10H), 4.52–4.47 (m, 1H), 4.46–4.40 (m, 2H,  $\text{NCH}_2\text{Ph}$ ), 4.33–4.28 (m, 1H), 4.28–4.24 (m, 1H), 4.23–4.16 (m, 2H), 3.98 (appt,  $J = 9.8$  Hz, 1H), 3.94–3.78 (m, 8H), 3.76–3.67 (m, 2H), 3.57–3.41 (m, 3H), 3.21–3.06 (m, 2H,  $\text{NCH}_2$ ), 2.96–2.85 (m, 3H, H-2',  $\text{PhCH}_2\text{CH}_2$ ) 2.52–2.32 (m, 2H,  $\text{PhCH}_2\text{CH}_2$ ), 1.64–1.40 (m, 4H, 2 X  $\text{CH}_2$ ), 1.35–1.18 (m, 2H,  $\text{CH}_2$ );  $^{13}\text{C}$  NMR (100 MHz,  $\text{CD}_3\text{COCD}_3$ ):  $\delta$  134.7, 134.5, 132.6, 127.7, 127.7, 127.6, 127.6, 127.4, 126.6, 125.9, 125.6, 125.1, 125.1, 123.5, 98.9 (2C), 94.8 (2C), 80.6, 80.3, 75.8, 75.0, 74.7, 73.9, 73.4, 72.7, 72.4, 71.5, 71.3, 70.3, 70.2, 69.8, 69.0, 68.9, 67.7 ( $\text{OCH}_2$ ), 67.4, 66.8, 63.6, 60.7, 55.1 (C-2'), 50.0, 46.6 ( $\text{NCH}_2$ ), 32.3 ( $\text{CH}_2\text{CF}_2$ ), 28.9, 27.8, 25.7 ( $\text{CH}_2\text{CH}_2\text{CF}_2$ ), 23.2; HRMS (ESI-TOF)  $m/z$   $[\text{M} - 3\text{Na} + 2\text{H}]^-$  calcd for  $\text{C}_{91}\text{H}_{95}\text{F}_{13}\text{N}_5\text{O}_{25}\text{S}$  1952.5779; Found 1952.5784.

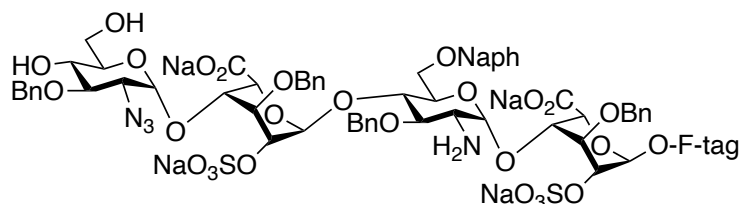

**90**

***N*-(Benzyl)-3,3,4,4,5,5,6,6,7,7,8,8,8-tridecafluorooctyl-benzyloxycarbonyl-5-aminopentyl (2-azido-3-*O*-benzyl-2-deoxy- $\alpha$ -D-glucopyranosyl)-(1 $\rightarrow$ 4)-(3-*O*-benzyl-2-*O*-sulfonato- $\alpha$ -L-idopyranosyluronate)-(1 $\rightarrow$ 4)-(2-amino-3-*O*-benzyl-2-deoxy-6-*O*-2-naphthylmethyl- $\alpha$ -D-glucopyranosyl)-(1 $\rightarrow$ 4)-3-*O*-benzyl-2-*O*-sulfonato- $\alpha$ -L-idopyranosyluronate tetrasodium salt (**90**).**

Compound **S6** (54 mg, 0.021 mmol) was treated according to the general procedure for hydrolysis to give tetrasaccharide **90** (40 mg, 88%);  $R_f$  0.59 (7:2:1,  $\text{EtOAc}-\text{CH}_3\text{OH}-\text{H}_2\text{O}$ );  $^1\text{H}$  NMR (400 MHz,  $\text{CD}_3\text{OD}$ ):  $\delta$  7.79–7.12 (m, 36H, ArH), 5.81 (bs, 1H, H-1''), 5.25–5.06 (m, 6H, H-1', H-1''',  $\text{NCO}_2\text{CH}_2$ , H-1,  $\text{ArCH}_2$ ), 5.00 (d,  $J = 10.6$  Hz, 1H,  $\text{ArCH}_2$ ), 4.74–3.98 (m, 17H), 3.94–3.60 (m, 7H), 3.52–3.30 (m, 4H), 3.27–3.03 (m, 3H), 2.94–2.82 (m, 2H,

PhCH<sub>2</sub>CH<sub>2</sub>) 2.51–2.32 (m, 2H, PhCH<sub>2</sub>CH<sub>2</sub>) , 1.58–1.38 (m, 4H, 2 X CH<sub>2</sub>), 1.34–1.14 (m, 2H, CH<sub>2</sub>); <sup>13</sup>C NMR (100 MHz, CD<sub>3</sub>COCD<sub>3</sub>): δ 134.7, 134.7, 134.7, 134.5, 132.6, 129.8, 127.9, 127.9, 127.7, 127.6, 127.6, 127.4, 125.3, 123.4, 98.7, 95.2, 93.4, 91.9, 80.8, 75.2, 75.0, 74.0, 73.4, 72.6, 71.6 (2C), 71.3, 70.2, 70.2, 70.0, 70.0, 69.5, 68.5, 68.4, 66.9, 66.8 (2C), 66.5, 63.9, 60.8, 54.2, 50.0, 46.3 (NCH<sub>2</sub>), 32.3 (CH<sub>2</sub>CF<sub>2</sub>), 27.6, 27.4, 25.7 (CH<sub>2</sub>CH<sub>2</sub>CF<sub>2</sub>), 23.2; HRMS (ESI-TOF) m/z [M – 4Na + 3H]<sup>-</sup> calcd for C<sub>91</sub>H<sub>95</sub>F<sub>13</sub>N<sub>5</sub>O<sub>29</sub>S<sub>2</sub> 2032.5347; Found 2032.5358.

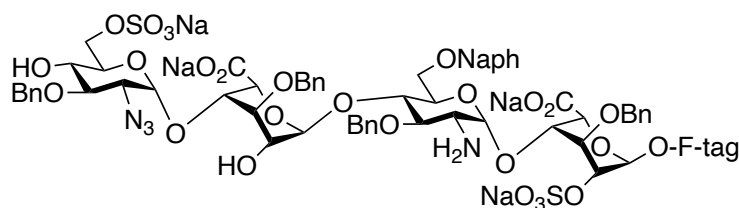

**91**

***N*-(Benzyl)-3,3,4,4,5,5,6,6,7,7,8,8,8-tridecafluorooctyl-benzoyloxycarbonyl-5-aminopentyl (2-azido-3-*O*-benzyl-2-deoxy-6-*O*-sulfonato- $\alpha$ -D-glucopyranosyl)-(1 $\rightarrow$ 4)-(3-*O*-benzyl- $\alpha$ -L-idopyranosyluronate)-(1 $\rightarrow$ 4)-(2-amino-3-*O*-benzyl-2-deoxy-6-*O*-2-naphthylmethyl- $\alpha$ -D-glucopyranosyl)-(1 $\rightarrow$ 4)-3-*O*-benzyl-2-*O*-sulfonato- $\alpha$ -L-idopyranosyluronate pentasodium salt (91).**

Compound **S7** (70 mg, 0.029 mmol) was treated according to the general procedure for hydrolysis to give tetrasaccharide **91** (56 mg, 91%); *R*<sub>f</sub> 0.68 (7:2:1, EtOAc–CH<sub>3</sub>OH–H<sub>2</sub>O); <sup>1</sup>H NMR (400 MHz, CD<sub>3</sub>OD): δ 7.92–7.07 (m, 36H, ArH), 5.39 (d, *J* = 3.7 Hz, 1H), 5.32 (d, *J* = 3.4 Hz, 1H), 5.14–5.02 (m, 5H), 4.84–4.59 (m, 10H), 4.54 (d, *J* = 12.0 Hz, 1H), 4.50–4.40 (m, 3H), 4.40–4.34 (m, 1H), 4.30–4.15 (m, 5H), 4.13–4.00 (m, 2H), 3.96–3.68 (m, 6H), 3.51–3.31 (m, 3H), 3.21–3.07 (m, 2H), 2.94–2.84 (m, 2H, PhCH<sub>2</sub>CH<sub>2</sub>), 2.52–2.31 (m, 2H, PhCH<sub>2</sub>CH<sub>2</sub>) , 1.64–1.41 (m, 4H, 2 X CH<sub>2</sub>), 1.35–1.23 (m, 2H, CH<sub>2</sub>); <sup>13</sup>C NMR (100 MHz, CD<sub>3</sub>OD): δ 127.7, 127.7, 127.6, 127.6, 126.6, 126.1, 125.6, 125.1, 99.2, 98.7, 95.3, 91.0, 80.3, 75.8, 75.6, 74.7, 74.2, 73.4, 73.2, 71.8, 71.3, 71.0, 70.8, 70.5, 70.2, 69.5, 68.7, 68.4, 67.7, 67.1, 66.8, 65.8, 63.6, 54.0, 50.0, 46.5 (NCH<sub>2</sub>), 32.3 (CH<sub>2</sub>CF<sub>2</sub>), 29.0, 27.9,

25.7 (CH<sub>2</sub>CH<sub>2</sub>CF<sub>2</sub>), 23.2; HRMS (ESI-TOF) m/z [M - 4Na + 3H]<sup>-</sup> calcd for C<sub>91</sub>H<sub>95</sub>F<sub>13</sub>N<sub>5</sub>O<sub>29</sub>S<sub>2</sub> 2032.5347; Found 2032.5325.

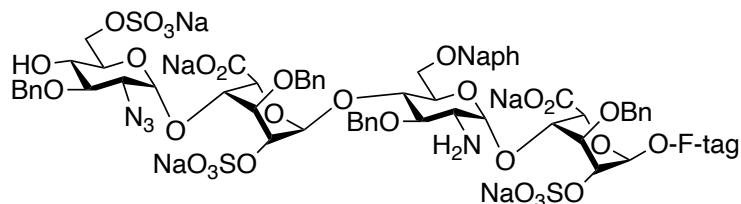

**92**

***N*-(Benzyl)-3,3,4,4,5,5,6,6,7,7,8,8,8-tridecafluorooctyl-benzyloxycarbonyl-5-aminopentyl (2-azido-3-*O*-benzyl-2-deoxy-6-*O*-sulfonato- $\alpha$ -D-glucopyranosyl)-(1 $\rightarrow$ 4)-(3-*O*-benzyl-2-*O*-sulfonato- $\alpha$ -L-idopyranosyluronate)-(1 $\rightarrow$ 4)-(2-amino-3-*O*-benzyl-2-deoxy-6-*O*-2-naphthylmethyl- $\alpha$ -D-glucopyranosyl)-(1 $\rightarrow$ 4)-3-*O*-benzyl-2-*O*-sulfonato- $\alpha$ -L-idopyranosyluronate pentasodium salt (92).**

Compound **S8** (64 mg, 0.027 mmol) was treated according to the general procedure for hydrolysis to give tetrasaccharide **92** (49 mg, 84%); *R*<sub>f</sub> 0.51 (7:2:1, EtOAc-CH<sub>3</sub>OH-H<sub>2</sub>O); <sup>1</sup>H NMR (400 MHz, CD<sub>3</sub>OD):  $\delta$  7.85–7.08 (m, 36H, ArH), 5.90 (bs, 1H, H-1''), 5.21–5.02 (m, 6H, H-1', H-1'''), NCO<sub>2</sub>CH<sub>2</sub>, H-1, ArCH<sub>2</sub>), 4.98–4.87 (m, 2H), 4.84–4.16 (m, 17H), 4.15–4.09 (m, 1H), 4.06–3.86 (m, 5H), 3.80–3.61 (m, 4H), 3.43–3.42 (m, 1H), 3.40–3.35 (m, 1H), 3.24–3.07 (m, 2H), 2.95–2.84 (m, 2H, PhCH<sub>2</sub>CH<sub>2</sub>), 2.77–2.67 (m, 1H), 2.52–2.33 (m, 2H, PhCH<sub>2</sub>CH<sub>2</sub>), 1.69–1.45 (m, 4H, 2 X CH<sub>2</sub>), 1.36–1.22 (m, 2H, CH<sub>2</sub>); <sup>13</sup>C NMR (100 MHz, CD<sub>3</sub>OD):  $\delta$  127.9, 127.7, 127.7, 127.6, 127.4, 126.9, 125.8, 125.5, 125.5, 125.1, 123.4, 99.0, 96.0, 94.2, 94.0, 80.2, 78.7, 77.2, 74.7 (2C), 73.5, 71.3 (3C), 71.0, 70.8, 70.5, 70.2, 69.8 (2C), 69.7, 69.5, 69.0, 68.4, 67.9, 67.3, 66.8, 66.3, 66.1, 63.6, 56.1, 50.0, 48.6, 46.5 (NCH<sub>2</sub>), 32.3 (CH<sub>2</sub>CF<sub>2</sub>), 28.7, 27.6, 25.7 (CH<sub>2</sub>CH<sub>2</sub>CF<sub>2</sub>), 23.2; HRMS (ESI-TOF) m/z [M - 5Na + 4H]<sup>-</sup> calcd for C<sub>91</sub>H<sub>95</sub>F<sub>13</sub>N<sub>5</sub>O<sub>32</sub>S<sub>3</sub> 2112.4915; Found 2112.4927.



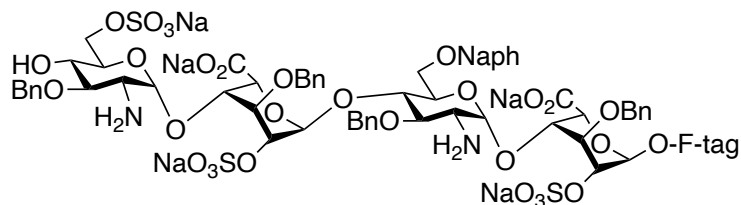

**93**

***N*-(Benzyl)-3,3,4,4,5,5,6,6,7,7,8,8,8-tridecafluorooctyl-benzyloxycarbonyl-5-aminopentyl (2-amino-3-*O*-benzyl-2-deoxy-6-*O*-sulfonato- $\alpha$ -D-glucopyranosyl)-(1 $\rightarrow$ 4)-(3-*O*-benzyl-2-*O*-sulfonato- $\alpha$ -L-idopyranosyluronate)-(1 $\rightarrow$ 4)-(2-amino-3-*O*-benzyl-2-deoxy-6-*O*-2-naphthylmethyl- $\alpha$ -D-glucopyranosyl)-(1 $\rightarrow$ 4)-3-*O*-benzyl-2-*O*-sulfonato- $\alpha$ -L-idopyranosyluronate pentasodium salt (93).**

Compound **92** (30 mg, 0.013 mmol) was treated according to the general procedure for N<sub>3</sub> to NH<sub>2</sub> conversion to give tetrasaccharide **93** (28 mg, 95%); *R*<sub>f</sub> 0.54 (7:2:1, EtOAc–CH<sub>3</sub>OH–H<sub>2</sub>O); <sup>1</sup>H NMR (400 MHz, CD<sub>3</sub>OD):  $\delta$  7.87–7.77 (m, 4H, ArH), 7.53–7.52 (m, 1H, ArH), 7.43–7.16 (m, 31H, ArH), 5.70 (s, 1H, H-1''), 5.21–5.08 (m, 7H, H-1', H-1'''), NCO<sub>2</sub>CH<sub>2</sub>, H-1, ArCH<sub>2</sub>), 4.86–4.50 (m, 11H), 4.47–4.38 (m, 4H), 4.26–4.05 (m, 6H), 3.96–3.45 (m, 6H), 3.43–3.42 (m, 1H), 3.35–3.30 (m, 1H), 3.18–3.10 (m, 3H), 2.93–2.88 (m, 2H, PhCH<sub>2</sub>CH<sub>2</sub>), 2.52–2.36 (m, 2H, PhCH<sub>2</sub>CH<sub>2</sub>), 1.69–1.45 (m, 4H, 2 X CH<sub>2</sub>), 1.36–1.22 (m, 2H, CH<sub>2</sub>); <sup>13</sup>C NMR (100 MHz, CD<sub>3</sub>OD):  $\delta$  127.9, 127.7, 127.5, 127.2, 126.3, 125.8, 125.5, 103.7, 98.8, 96.1, 91.6, 78.3, 75.4, 74.7 (2C), 73.0, 71.4, 71.0, 70.3, 70.2, 70.0, 69.8, 69.7, 69.3, 69.2, 68.0, 67.7, 67.2, 66.8, 66.4, 65.5, 54.9, 53.9, 50.0, 46.5 (NCH<sub>2</sub>), 32.2 (CH<sub>2</sub>CF<sub>2</sub>), 28.7, 27.4, 25.7 (CH<sub>2</sub>CH<sub>2</sub>CF<sub>2</sub>), 23.2; HRMS (ESI-TOF) *m/z* [M – 5Na + 4H]<sup>–</sup> calcd for C<sub>91</sub>H<sub>97</sub>F<sub>13</sub>N<sub>3</sub>O<sub>32</sub>S<sub>3</sub> 2086.5010; Found 2086.4995.

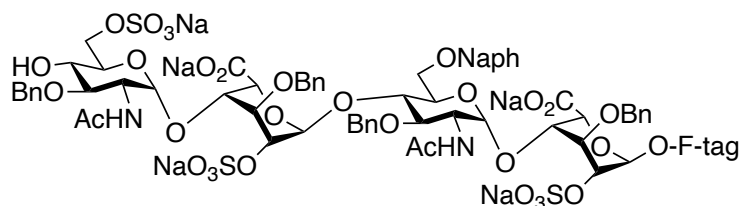

**94**

***N*-(Benzyl)-3,3,4,4,5,5,6,6,7,7,8,8,8-tridecafluorooctyl-benzyloxycarbonyl-5-aminopentyl (2-acetamido-3-*O*-benzyl-2-deoxy-6-*O*-sulfonato- $\alpha$ -D-glucopyranosyl)-(1 $\rightarrow$ 4)-(3-*O*-benzyl-2-*O*-sulfonato- $\alpha$ -L-idopyranosyluronate)-(1 $\rightarrow$ 4)-(2-acetamido-3-*O*-benzyl-2-deoxy-6-*O*-2-naphthylmethyl- $\alpha$ -D-glucopyranosyl)-(1 $\rightarrow$ 4)-3-*O*-benzyl-2-*O*-sulfonato- $\alpha$ -L-idopyranosyluronate pentasodium salt (**94**).**

Compound **93** (10 mg, 0.0045 mmol) was treated according to the general procedure for *N*-acetylation to give tetrasaccharide **94** (9.7 mg, 94%);  $R_f$  0.37 (12:5:3:1 EtOAc/pyridine/H<sub>2</sub>O/AcOH); <sup>1</sup>H NMR (400 MHz, CD<sub>3</sub>OD):  $\delta$  7.83–7.75 (m, 4H, ArH), 7.50–7.11 (m, 32H, ArH), 6.03 (s, 1H, H-1"), 5.17–5.08 (m, 4H, NCO<sub>2</sub>CH<sub>2</sub>, H-1, ArCH<sub>2</sub>), 4.92–4.56 (m, 13H), 4.48–4.35 (m, 6H), 4.31–4.03 (m, 7H), 3.85–3.63 (m, 7H), 3.52–3.45 (m, 1H), 3.19–3.12 (m, 3H), 2.93–2.88 (m, 2H, PhCH<sub>2</sub>CH<sub>2</sub>), 2.50–2.38 (m, 2H, PhCH<sub>2</sub>CH<sub>2</sub>), 2.08 (NCOCH<sub>3</sub>), 2.06 (NCOCH<sub>3</sub>), 1.69–1.45 (m, 4H, 2 X CH<sub>2</sub>), 1.36–1.22 (m, 2H, CH<sub>2</sub>); <sup>13</sup>C NMR (100 MHz, CD<sub>3</sub>OD):  $\delta$  127.9, 127.7, 127.5, 127.2, 126.3, 125.8, 125.5, 99.0, 97.4, 95.5, 93.5, 79.9, 76.0, 74.4, 74.1, 73.9, 73.6, 72.9, 72.1, 71.9, 71.2, 71.0, 70.3, 70.1, 70.0, 69.0, 68.6, 68.5, 67.9, 67.3, 66.8, 66.1, 53.1, 52.6, 50.0, 46.5 (NCH<sub>2</sub>), 32.2 (CH<sub>2</sub>CF<sub>2</sub>), 28.7, 27.4, 25.7 (CH<sub>2</sub>CH<sub>2</sub>CF<sub>2</sub>), 23.2, 22.2 (NCOCH<sub>3</sub>), 22.1 (NCOCH<sub>3</sub>); HRMS (ESI-TOF)  $m/z$  [M – 5Na + 4H]<sup>–</sup> calcd for C<sub>95</sub>H<sub>101</sub>F<sub>13</sub>N<sub>3</sub>O<sub>34</sub>S<sub>3</sub> 2170.5221; Found 2170.5239.

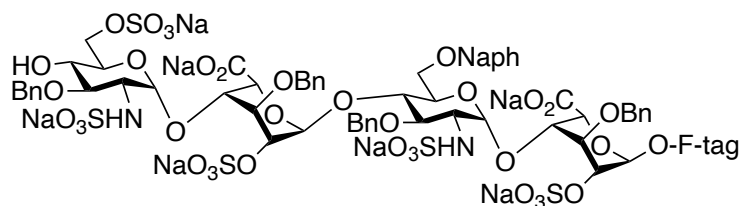

**95**

***N*-(Benzyl)-3,3,4,4,5,5,6,6,7,7,8,8,8-tridecafluorooctyl-benzyloxycarbonyl-5-aminopentyl (3-*O*-benzyl-2-deoxy-2-sulfamino-6-*O*-sulfonato- $\alpha$ -D-glucopyranosyl)-(1 $\rightarrow$ 4)-(3-*O*-benzyl-2-*O*-sulfonato- $\alpha$ -L-idopyranosyluronate)-(1 $\rightarrow$ 4)-(3-*O*-benzyl-2-**

**deoxy-6-O-2-naphthylmethyl-2-sulfamino- $\alpha$ -D-glucopyranosyl)-(1 $\rightarrow$ 4)-3-O-benzyl-2-O-sulfonato- $\alpha$ -L-idopyranosyluronate pentasodium salt (**95**).**

Compound **93** (10 mg, 0.0045 mmol) was treated according to the general procedure for *N*-sulfation to give tetrasaccharide **95** (9.8 mg, 91%);  $R_f$  0.15 (12:5:3:1 EtOAc/pyridine/H<sub>2</sub>O/AcOH); <sup>1</sup>H NMR (400 MHz, CD<sub>3</sub>OD):  $\delta$  7.81–7.75 (m, 4H, ArH), 7.55–7.10 (m, 32H, ArH), 6.05 (s, 1H, H-1''), 5.38–5.29 (m, 4H, H-1', H-1''', H-1, ArCH<sub>2</sub>), 5.15–5.06 (m, 4H, NCO<sub>2</sub>CH<sub>2</sub>, ArCH<sub>2</sub>), 4.97 (d,  $J$  = 10.6 Hz, 1H, ArCH<sub>2</sub>), 4.88–4.59 (m, 10H), 4.53–4.31 (m, 6H), 4.28–4.00 (m, 6H), 3.87–3.62 (m, 4H), 3.62–3.56 (m, 1H), 3.53–3.48 (m, 1H), 3.41–3.36 (m, 1H), 3.19–3.10 (m, 2H), 2.93–2.89 (m, 2H, PhCH<sub>2</sub>CH<sub>2</sub>), 2.51–2.37 (m, 2H, PhCH<sub>2</sub>CH<sub>2</sub>), 1.69–1.45 (m, 4H, 2 X CH<sub>2</sub>), 1.36–1.22 (m, 2H, CH<sub>2</sub>); <sup>13</sup>C NMR (100 MHz, CD<sub>3</sub>OD):  $\delta$  127.9, 127.7, 127.5, 127.2, 126.3, 125.8, 125.5, 98.8, 98.3, 96.2, 91.6, 79.6, 75.7, 74.5, 74.0, 73.9, 73.6, 73.3, 71.3, 71.0, 70.7, 70.6, 70.3, 70.1, 68.7, 68.5, 67.5, 67.2, 66.6, 66.5, 66.4, 59.1, 58.0, 50.0, 46.5 (NCH<sub>2</sub>), 32.2 (CH<sub>2</sub>CF<sub>2</sub>), 28.7, 27.4, 25.7 (CH<sub>2</sub>CH<sub>2</sub>CF<sub>2</sub>), 23.2; HRMS (ESI-TOF)  $m/z$  [M – 7Na + 5H]<sup>–2</sup> calcd for C<sub>91</sub>H<sub>98</sub>F<sub>13</sub>N<sub>3</sub>O<sub>38</sub>S<sub>5</sub> 1122.7030; Found 1122.7230.

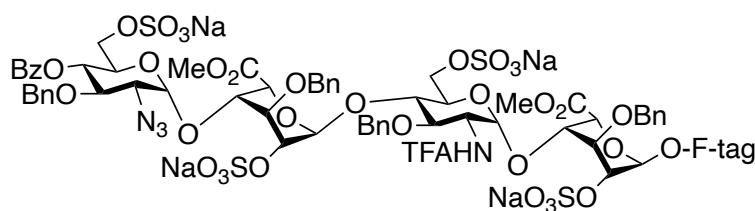

**S1**

***N*-(Benzyl)-3,3,4,4,5,5,6,6,7,7,8,8,8-tridecafluorooctyl-benzyloxycarbonyl-5-aminopentyl (2-azido-3-O-benzyl-4-O-benzoyl-2-deoxy-6-O-sulfonato- $\alpha$ -D-glucopyranosyl)-(1 $\rightarrow$ 4)-(methyl 3-O-benzyl-2-O-sulfonato- $\alpha$ -L-idopyranosyluronate)-(1 $\rightarrow$ 4)-(3-O-benzyl-2-deoxy-6-O-sulfonato-2-trifluoroacetamido- $\alpha$ -D-glucopyranosyl)-(1 $\rightarrow$ 4)-(methyl 3-O-benzyl-2-O-sulfonato- $\alpha$ -L-idopyranosyluronate (**S1**).**

Compound **80** (70 mg, 0.036 mmol) was treated according to the general procedure for O-sulfation to give tetrasaccharide **S1** (77 mg, 91%);  $R_f$  0.25 (5:1 DCM/MeOH);  $^1\text{H NMR}$  (400 MHz,  $\text{CD}_3\text{OD}$ ):  $\delta$  7.98–7.97 (m, 2H, Ar), 7.63–7.56 (m, 3H, Ar), 7.49–7.44 (m, 4H, Ar), 7.37–7.04 (m, 25H, Ar), 5.50 (s, 1H, H-1''), 5.20 (t,  $J = 9.6$  Hz, 1H, H-4'''), 5.15–5.07 (m, 5H, H-1''', H-1', H-1,  $\text{NCO}_2\text{CH}_2$ ), 4.97 (d,  $J = 1.2$  Hz, 1H, H-5''), 4.93–4.74 (m, 5H,  $\text{CH}_2\text{Ph}$ , H-5), 4.65–4.51 (m, 6H), 4.46 (br, 2H,  $\text{NCH}_2\text{Ph}$ ), 4.40–4.36 (m, 4H), 4.27 (dd,  $J = 10.7, 3.3$  Hz, 1H, H-2'), 4.14–3.95 (m, 7H), 3.89 (s, 3H,  $\text{OCH}_3$ ), 3.88–3.71 (m, 3H), 3.57 (dd,  $J = 10.2, 3.2$  Hz, 1H, H-2'''), 3.51–3.46 (m, 1H,  $\text{OCH}_2\text{CH}_2$ ), 3.41 (s, 3H,  $\text{OCH}_3$ ), 3.23–3.16 (m, 2H,  $\text{NCH}_2$ ), 2.93–2.90 (m, 2H,  $\text{PhCH}_2\text{CH}_2$ ), 2.51–2.37 (m, 2H,  $\text{PhCH}_2\text{CH}_2$ ), 1.63–1.47 (m, 4H, 2 X  $\text{CH}_2$ ), 1.36–1.27 (m, 2H,  $\text{CH}_2$ );  $^{13}\text{C NMR}$  (100 MHz,  $\text{CD}_3\text{COCD}_3$ ):  $\delta$  170.8, 170.4, 165.4, 158.4 (q,  $^2J_{\text{C,F}} = 37.0$  Hz,  $\text{CF}_3\text{C}=\text{O}$ ), 137.9, 137.7, 137.6, 137.4, 133.2, 129.5, 128.5, 128.3, 128.2, 128.2, 128.1, 128.0, 127.9, 127.7, 127.4, 127.4, 127.3, 127.2, 126.9, 115.8 (q,  $^1J_{\text{C,F}} = 287$  Hz,  $\text{CF}_3$ ), 99.9 (C-1), 97.5 (C-1''), 97.1 (C-1'''), 95.4 (C-1'), 78.0, 77.4, 75.0, 74.9, 72.5, 72.2, 71.7, 71.6, 71.5, 71.1, 70.7, 70.6, 70.1, 69.5, 69.3, 68.0, 66.7, 66.2, 65.9, 65.7, 63.9, 53.9 (C-2'), 52.0 ( $\text{OCH}_3$ ), 51.7 ( $\text{OCH}_3$ ), 50.1, 49.9, 32.2 (t,  $^2J_{\text{C,F}} = 21.6$  Hz,  $\text{CH}_2\text{CF}_2$ ), 28.8, 27.6, 25.7 (t,  $^3J_{\text{C,F}} = 5.0$  Hz,  $\text{CH}_2\text{CH}_2\text{CF}_2$ ), 23.2; HRMS (ESI-TOF)  $m/z$   $[\text{M} - \text{Na}]^-$  calcd for  $\text{C}_{91}\text{H}_{91}\text{F}_{16}\text{N}_5\text{O}_{37}\text{S}_4\text{Na}_3$  2346.3713; Found 2346.3743.

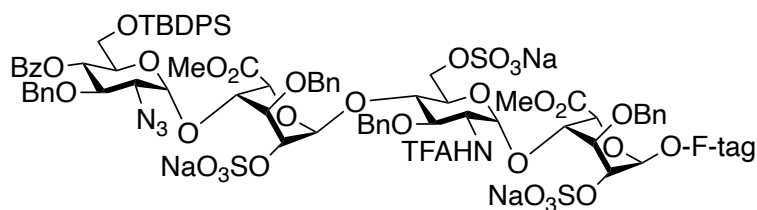

**S2**

***N*-(Benzyl)-3,3,4,4,5,5,6,6,7,7,8,8,8-tridecafluorooctyl-benzoyloxycarbonyl-5-aminopentyl (2-azido-3-*O*-benzyl-4-*O*-benzoyl-2-deoxy-6-*O*-*tert*-butyldiphenylsilyl- $\alpha$ -D-glucopyranosyl)-(1 $\rightarrow$ 4)-(methyl 3-*O*-benzyl-2-*O*-sulfonato- $\alpha$ -L-idopyranosyluronate)-(1 $\rightarrow$ 4)-(3-*O*-benzyl-2-deoxy-6-*O*-sulfonato-2-**

**trifluoroacetamido- $\alpha$ -D-glucopyranosyl)-(1 $\rightarrow$ 4)-(methyl 3-O-benzyl-2-O-sulfonato- $\alpha$ -L-idopyranosyluronate (S2).**

Compound **79** (70 mg, 0.032 mmol) was treated according to the general procedure for O-sulfation to give tetrasaccharide **S2** (71 mg, 89%);  $R_f$  0.63 (5:1 DCM/MeOH);  $^1\text{H}$  NMR (400 MHz,  $\text{CD}_3\text{OD}$ ):  $\delta$  7.94–7.92 (m, 2H, Ar), 7.73–7.71 (m, 2H, Ar), 7.66–7.64 (m, 3H, Ar), 7.52–7.02 (m, 35H, Ar), 6.97–6.95 (m, 2H, Ar), 5.50 (t,  $J = 9.8$  Hz, 1H, H-4'''), 5.48 (s, 1H, H-1''), 5.18 (d,  $J = 3.3$  Hz, 1H, H-1'''), 5.14–5.10 (m, 3H, H-1,  $\text{NCO}_2\text{CH}_2$ ), 5.07 (d,  $J = 3.3$  Hz, 1H, H-1'), 4.94 (d,  $J = 1.3$  Hz, 1H, H-5''), 4.91–4.76 (m, 4H,  $\text{CH}_2\text{Ph}$ , H-5), 4.67–4.51 (m, 7H), 4.46 (s, 2H,  $\text{NCH}_2\text{Ph}$ ), 4.44–4.36 (m, 4H), 4.27 (dd,  $J = 10.6, 3.2$  Hz, 1H, H-2'), 4.13 (s, 1H), 4.08 (t,  $J = 9.4$  Hz, 1H), 4.03 (t,  $J = 9.7$  Hz, 1H), 3.95 (s, 1H), 3.89–3.85 (m, 1H), 3.85 (s, 3H,  $\text{OCH}_3$ ), 3.81–3.70 (m, 3H), 3.67–3.63 (m, 2H), 3.55 (dd,  $J = 10.3, 3.3$  Hz, 1H, H-2'''), 3.51–3.46 (m, 1H,  $\text{OCH}_2\text{CH}_2$ ), 3.23–3.16 (m, 2H,  $\text{NCH}_2$ ), 3.15 (s, 3H,  $\text{OCH}_3$ ), 2.93–2.90 (m, 2H,  $\text{PhCH}_2\text{CH}_2$ ), 2.51–2.39 (m, 2H,  $\text{PhCH}_2\text{CH}_2$ ), 1.63–1.47 (m, 4H, 2 X  $\text{CH}_2$ ), 1.36–1.27 (m, 2H,  $\text{CH}_2$ ), 0.96 (s, 9H,  $(\text{CH}_3)_3\text{C}$ );  $^{13}\text{C}$  NMR (100 MHz,  $\text{CD}_3\text{COCD}_3$ ):  $\delta$  170.5, 170.4, 165.1, 158.0 (q,  $^2J_{\text{C,F}} = 37.0$  Hz,  $\text{CF}_3\text{C}=\text{O}$ ), 138.0, 137.9, 137.6, 137.4, 135.4, 135.2, 134.5, 132.8, 132.7, 129.7, 129.5, 129.4, 129.4, 129.0, 128.4, 128.3, 128.3, 128.2, 128.1, 128.0, 127.9, 127.7, 127.5, 127.4, 127.4, 127.3, 127.2, 127.2, 126.9, 126.5, 115.8 (q,  $^1J_{\text{C,F}} = 287$  Hz,  $\text{CF}_3$ ), 99.9 (C-1), 97.7 (C-1''), 96.4 (C-1'''), 95.4 (C-1'), 78.1, 77.5, 74.8, 74.7, 72.2, 72.0, 71.6, 71.5, 71.4, 71.1, 70.7, 70.5, 70.3, 70.2, 70.1, 69.2, 66.7, 66.2, 65.7, 63.9, 62.1, 53.8 (C-2'), 51.9 ( $\text{OCH}_3$ ), 51.3 ( $\text{OCH}_3$ ), 50.1, 49.9, 32.2 (t,  $^2J_{\text{C,F}} = 21.6$  Hz,  $\text{CH}_2\text{CF}_2$ ), 28.8, 27.5, 25.9 ( $(\text{CH}_3)_3\text{C}$ ), 25.7 (t,  $^3J_{\text{C,F}} = 5.0$  Hz,  $\text{CH}_2\text{CH}_2\text{CF}_2$ ), 23.2, 22.3, 18.6 ( $(\text{CH}_3)_3\text{C}$ ); HRMS (ESI-TOF)  $m/z$   $[\text{M} - 3\text{Na} + 2\text{H}]^-$  calcd for  $\text{C}_{107}\text{H}_{112}\text{F}_{16}\text{N}_5\text{O}_{34}\text{S}_3\text{Si}$  2438.5864; Found 2438.5847.

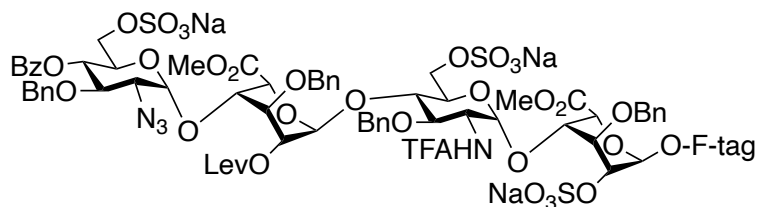

**S3**

***N*-(Benzyl)-3,3,4,4,5,5,6,6,7,7,8,8,8-tridecafluorooctyl-benzoyloxycarbonyl-5-aminopentyl (2-azido-3-*O*-benzyl-4-*O*-benzoyl-2-deoxy-6-*O*-sulfonato- $\alpha$ -D-glucopyranosyl)-(1 $\rightarrow$ 4)-(methyl 3-*O*-benzyl-2-*O*-levulinoyl- $\alpha$ -L-idopyranosylurionate)-(1 $\rightarrow$ 4)-(3-*O*-benzyl-2-deoxy-2-*O*-sulfonato-2-trifluoroacetamido- $\alpha$ -D-glucopyranosyl)-(1 $\rightarrow$ 4)-(methyl 3-*O*-benzyl-2-*O*-sulfonato- $\alpha$ -L-idopyranosylurionate (**S3**).**

Compound **81** (72 mg, 0.035 mmol) was treated according to the general procedure for *O*-sulfation to give tetrasaccharide **S3** (73 mg, 88%);  $R_f$  0.29 (5:1 DCM/MeOH);  $^1\text{H}$  NMR (400 MHz,  $\text{CD}_3\text{OD}$ ):  $\delta$  7.98–7.96 (m, 2H, Ar), 7.73–7.71 (m, 2H, Ar), 7.70–7.68 (m, 2H, Ar), 7.64–7.61 (m, 1H, Ar), 7.55–7.07 (m, 29H, Ar), 5.31 (s, 1H, H-1''), 5.27 (t,  $J = 9.6$  Hz, 1H, H-4'''), 5.15 (d,  $J = 3.3$  Hz, 1H, H-1'''), 5.14–5.10 (m, 3H, H-1,  $\text{NCO}_2\text{CH}_2$ ), 5.06 (d,  $J = 3.3$  Hz, 1H, H-1'), 5.05 (s, 1H, H-2''), 4.93 (d,  $J = 1.5$  Hz, 1H, H-5''), 4.90–4.72 (m, 5H,  $\text{CH}_2\text{Ph}$ , H-5), 4.65–4.52 (m, 5H), 4.46–4.45 (m, 2H,  $\text{NCH}_2\text{Ph}$ ), 4.38 (s, 1H), 4.29–4.21 (m, 3H), 4.13–3.96 (m, 8H), 3.86 (s, 3H,  $\text{OCH}_3$ ), 3.85–3.69 (m, 3H), 3.56 (dd,  $J = 10.2, 3.4$  Hz, 1H, H-2'''), 3.54–3.46 (m, 1H,  $\text{OCH}_2\text{CH}_2$ ), 3.41 (s, 3H,  $\text{OCH}_3$ ), 3.23–3.16 (m, 2H,  $\text{NCH}_2$ ), 3.03–2.69 (m, 6H), 2.51–2.37 (m, 2H,  $\text{PhCH}_2\text{CH}_2$ ), 2.15 (s, 3H), 1.63–1.47 (m, 4H, 2 X  $\text{CH}_2$ ), 1.36–1.27 (m, 2H,  $\text{CH}_2$ );  $^{13}\text{C}$  NMR (100 MHz,  $\text{CD}_3\text{COCD}_3$ ):  $\delta$  208.4 ( $\text{C}=\text{OCH}_3$ ), 172.4, 170.5, 170.4, 165.3, 158.0 (q,  $^2J_{\text{C},\text{F}} = 37.0$  Hz,  $\text{CF}_3\text{C}=\text{O}$ ), 137.8, 137.7, 137.4, 137.3, 134.0, 134.0, 133.3, 130.1, 129.5, 129.4, 128.4, 128.2, 128.1, 128.0, 127.8, 127.8, 127.7, 127.7, 127.5, 127.5, 127.4, 127.2, 127.0, 115.8 (q,  $^1J_{\text{C},\text{F}} = 287$  Hz,  $\text{CF}_3$ ), 99.9 (C-1), 97.2 (C-1''), 96.4 (C-1'''), 95.7 (C-1'), 77.6, 77.4, 75.2, 74.3, 72.8, 72.4, 71.8, 71.7, 71.5, 70.6, 70.5, 70.5, 70.2, 69.2, 67.0, 66.6, 66.2, 65.8, 65.3, 63.2, 53.8 (C-2'), 51.9 ( $\text{OCH}_3$ ), 51.7 ( $\text{OCH}_3$ ), 50.1, 49.9, 37.4, 34.4, 32.2 (t,  $^2J_{\text{C},\text{F}} = 21.6$  Hz,  $\text{CH}_2\text{CF}_2$ ), 28.8, 28.4

(C=OCH<sub>3</sub>), 27.6, 27.5, 25.7 (t, <sup>3</sup>J<sub>C,F</sub> = 5.0 Hz, CH<sub>2</sub>CH<sub>2</sub>CF<sub>2</sub>), 23.2; HRMS (ESI-TOF) m/z [M - 3Na + 2H]<sup>-</sup> calcd for C<sub>96</sub>H<sub>100</sub>F<sub>16</sub>N<sub>5</sub>O<sub>36</sub>S<sub>3</sub> 2298.5054; Found 2298.5039.

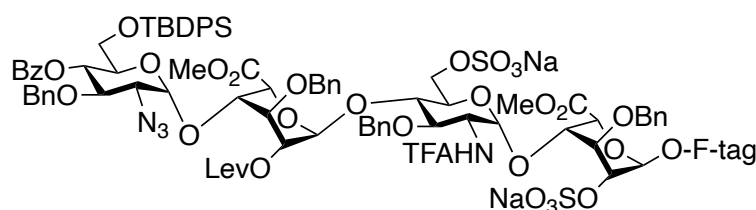

**S4**

***N*-(Benzyl)-3,3,4,4,5,5,6,6,7,7,8,8,8-tridecafluorooctyl-benzoyloxycarbonyl-5-aminopentyl (2-azido-3-*O*-benzyl-4-*O*-benzoyl-2-deoxy-6-*O*-*tert*-butyldiphenylsilyl- $\alpha$ -D-glucopyranosyl)-(1 $\rightarrow$ 4)-(methyl 3-*O*-benzyl-2-*O*-levulinoyl- $\alpha$ -L-idopyranosyluronate)-(1 $\rightarrow$ 4)-(3-*O*-benzyl-2-deoxy-6-*O*-sulfonato-2-trifluoroacetamido- $\alpha$ -D-glucopyranosyl)-(1 $\rightarrow$ 4)-(methyl 3-*O*-benzyl-2-*O*-sulfonato- $\alpha$ -L-idopyranosyluronate (S4).**

Compound **78** (73 mg, 0.032 mmol) was treated according to the general procedure for O-sulfation to give tetrasaccharide **S4** (72 mg, 91%); *R*<sub>f</sub> 0.71 (5:1 DCM/MeOH); <sup>1</sup>H NMR (400 MHz, CD<sub>3</sub>OD):  $\delta$  7.94–7.92 (m, 2H, Ar), 7.69–7.63 (m, 3H, Ar), 7.54–7.50 (m, 4H, Ar), 7.45–7.04 (m, 35H, Ar), 5.51 (t, *J* = 9.8 Hz, 1H, H-4'''), 5.32 (s, 1H, H-1''), 5.21 (d, *J* = 3.5 Hz, 1H, H-1'''), 5.14–5.10 (m, 3H, H-1, NCO<sub>2</sub>CH<sub>2</sub>), 5.07 (s, 1H, H-2''), 5.05 (d, *J* = 3.4 Hz, 1H, H-1'), 4.90–4.73 (m, 5H, CH<sub>2</sub>Ph, H-5, H-5''), 4.69–4.54 (m, 6H), 4.51 (s, 1H), 4.46–4.45 (m, 2H, NCH<sub>2</sub>Ph), 4.37 (s, 1H), 4.29–4.18 (m, 3H), 4.09–3.95 (m, 3H), 3.87–3.66 (m, 9H), 3.53 (dd, *J* = 10.2, 3.4 Hz, 1H, H-2'''), 3.53–3.43 (m, 1H, OCH<sub>2</sub>CH<sub>2</sub>), 3.24–3.16 (m, 2H, NCH<sub>2</sub>), 3.15 (s, 3H, OCH<sub>3</sub>), 3.01–2.69 (m, 6H), 2.49–2.40 (m, 2H, PhCH<sub>2</sub>CH<sub>2</sub>), 2.16 (s, 3H), 1.63–1.47 (m, 4H, 2 X CH<sub>2</sub>), 1.36–1.27 (m, 2H, CH<sub>2</sub>), 0.96 (s, 9H, (CH<sub>3</sub>)<sub>3</sub>C); <sup>13</sup>C NMR (100 MHz, CD<sub>3</sub>COCD<sub>3</sub>):  $\delta$  208.5 (C=OCH<sub>3</sub>), 172.5, 170.4, 170.1, 165.1, 158.3 (q, <sup>2</sup>J<sub>C,F</sub> = 37.0 Hz, CF<sub>3</sub>C=O), 138.1, 137.9, 137.4, 135.4, 135.2, 133.3, 132.8, 132.7, 129.5, 129.4, 128.5, 128.3, 128.3, 128.2, 128.1, 128.0, 127.9, 127.8, 127.5, 127.5, 127.4, 127.4, 127.3, 126.9, 126.7, 126.6, 115.8 (q, <sup>1</sup>J<sub>C,F</sub> = 287 Hz, CF<sub>3</sub>), 99.9 (C-

1), 97.6 (C-1''), 96.2 (C-1'''), 95.8 (C-1'), 77.7, 77.5, 74.8, 74.3, 73.6, 72.4, 72.0, 71.7, 71.3, 71.1, 70.8, 70.5, 70.4, 70.3, 70.2, 69.2, 67.3, 66.8, 66.6, 66.2, 65.3, 63.3, 62.2, 54.6, 53.8 (C-2'), 51.9 (OCH<sub>3</sub>), 51.3 (OCH<sub>3</sub>), 50.1, 49.9, 46.6, 37.4, 32.2 (t, <sup>2</sup>J<sub>C,F</sub> = 21.6 Hz, CH<sub>2</sub>CF<sub>2</sub>), 28.8, 28.3, 27.6, 27.5, 25.9 ((CH<sub>3</sub>)<sub>3</sub>C), 25.7 (t, <sup>3</sup>J<sub>C,F</sub> = 5.0 Hz, CH<sub>2</sub>CH<sub>2</sub>CF<sub>2</sub>), 23.2, 18.8 ((CH<sub>3</sub>)<sub>3</sub>C); HRMS (ESI-TOF) m/z [M - 2Na + 2H]<sup>-</sup> calcd for C<sub>112</sub>H<sub>118</sub>F<sub>16</sub>N<sub>5</sub>O<sub>33</sub>S<sub>2</sub>Si 2456.6665; Found 2456.6628.

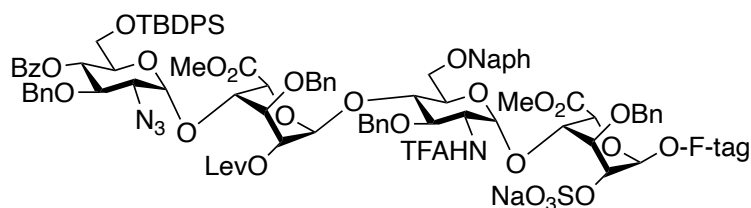

**S5**

***N*-(Benzyl)-3,3,4,4,5,5,6,6,7,7,8,8,8-tridecafluorooctyl-benzoyloxycarbonyl-5-aminopentyl (2-azido-3-*O*-benzyl-4-*O*-benzoyl-2-deoxy-6-*O*-*tert*-butyldiphenylsilyl- $\alpha$ -D-glucopyranosyl)-(1 $\rightarrow$ 4)-(methyl 3-*O*-benzyl-2-*O*-levulinoyl- $\alpha$ -L-idopyranosyluronate)-(1 $\rightarrow$ 4)-(3-*O*-benzyl-2-deoxy-6-*O*-2-naphthylmethyl-2-trifluoroacetamido- $\alpha$ -D-glucopyranosyl)-(1 $\rightarrow$ 4)-(methyl 3-*O*-benzyl-2-*O*-sulfonato- $\alpha$ -L-idopyranosyluronate monosodium salt (S5).**

Compound **75** (75 mg, 0.031 mmol) was treated according to the general procedure for *O*-sulfation to give tetrasaccharide **S5** (70 mg, 90%); *R*<sub>f</sub> 0.27 (100% EtOAc); <sup>1</sup>H NMR (400 MHz, CD<sub>3</sub>COCD<sub>3</sub>):  $\delta$  8.05–7.01 (m, 46H, ArH), 5.67 (app t, *J* = 9.1 Hz, 1H, H-4'''), 5.46 (d, *J* = 3.1 Hz, 1H, H-1''), 5.34 (d, *J* = 3.5 Hz, 1H, H-1'''), 5.20–5.12 (m, 2H, NCO<sub>2</sub>CH<sub>2</sub>), 5.09 (appt, *J* = 3.1 Hz, 1H, H-2''), 5.03–4.97 (m, 2H, H-1, H-2'), 4.96–4.90 (m, 2H), 4.87–4.71 (m, 6H), 4.65–4.56 (m, 3H), 4.54–4.48 (m, 3H), 4.24–3.92 (m, 9H), 3.85–3.63 (m, 5H), 3.55 (s, 3H, COOCH<sub>3</sub>), 3.50–3.35 (m, 4H), 3.28–3.15 (m, 2H, NCH<sub>2</sub>), 3.02–2.93 (m, 2H, PhCH<sub>2</sub>CH<sub>2</sub>) 2.80–2.71 (m, 2H, COCH<sub>2</sub>CH<sub>2</sub>), 2.66–2.46 (m, 4H, COCH<sub>2</sub>CH<sub>2</sub>, PhCH<sub>2</sub>CH<sub>2</sub>), 2.09 (s, 3H, CH<sub>3</sub>C=O), 1.65–1.48 (m, 4H, 2 X CH<sub>2</sub>), 1.41–1.27 (m, 2H, CH<sub>2</sub>), 1.02 (s, 9H, (CH<sub>3</sub>)<sub>3</sub>C); <sup>13</sup>C NMR (100 MHz, CD<sub>3</sub>COCD<sub>3</sub>):  $\delta$  206.0, 172.9 (C=O), 170.4



(C=O), 169.7 (C=O), 165.6 (C=O), 140.2, 139.8, 139.6, 139.5, 138.8, 138.7, 137.2, 136.5, 136.3, 134.3, 134.2, 133.93, 133.87, 133.8, 130.8, 130.6, 130.5, 129.6, 129.4, 129.33, 129.28, 129.04, 128.95, 128.9, 128.8, 128.61, 128.56, 128.5, 128.42, 128.39, 128.3, 128.2, 128.1, 127.9, 127.4, 127.2, 127.0, 126.8, 126.5, 100.9 (C-1), 100.4 (C-1'), 98.5 (C-1''), 97.8 (C-1'''), 78.8, 78.2, 77.4, 76.0, 75.6, 75.1, 74.2, 73.7, 73.1, 72.6, 72.2, 72.0, 71.3, 70.7, 69.7 (C-2''), 69.4, 68.5, 67.3, 67.2 (NCOCH<sub>2</sub>), 64.0 (C-2'''), 63.0, 55.8, 52.0, 52.0, 38.3, 33.0 (t, <sup>2</sup>J<sub>C,F</sub> = 21.4 Hz, CH<sub>2</sub>CF<sub>2</sub>), 28.6 (CH<sub>3</sub>CO), 27.1 (CH<sub>3</sub>)<sub>3</sub>C), 26.6 (t, <sup>3</sup>J<sub>C,F</sub> = 4.0 Hz, CH<sub>2</sub>CH<sub>2</sub>CF<sub>2</sub>), 24.2, 19.7 (CH<sub>3</sub>)<sub>3</sub>C); HRMS (ESI-TOF) m/z [M – Na]<sup>–</sup> calcd for C<sub>123</sub>H<sub>126</sub>F<sub>16</sub>N<sub>5</sub>O<sub>30</sub>SSi 2516.7722; Found 2516.7751.

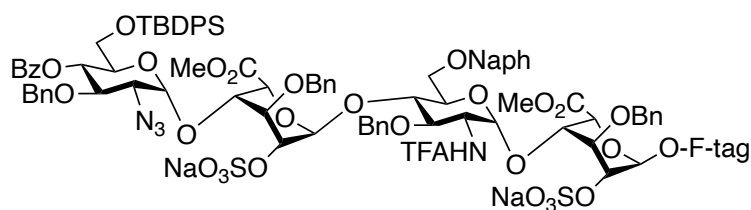

**S6**

***N*-(Benzyl)-3,3,4,4,5,5,6,6,7,7,8,8,8-tridecafluorooctyl-benzoyloxycarbonyl-5-aminopentyl (2-azido-3-*O*-benzyl-4-*O*-benzoyl-2-deoxy-6-*O*-*tert*-butyldiphenylsilyl- $\alpha$ -D-glucopyranosyl)-(1 $\rightarrow$ 4)-(methyl 3-*O*-benzyl-2-*O*-sulfonato- $\alpha$ -L-idopyranosylurionate)-(1 $\rightarrow$ 4)-(3-*O*-benzyl-2-deoxy-6-*O*-2-naphthylmethyl-2-trifluoroacetamido- $\alpha$ -D-glucopyranosyl)-(1 $\rightarrow$ 4)-(methyl 3-*O*-benzyl-*O*-sulfonato- $\alpha$ -L-idopyranosylurionate (S6).**

Compound **82** (73 mg, 0.031 mmol) was treated according to the general procedure for *O*-sulfation to give tetrasaccharide **S6** (70 mg, 88%); *R*<sub>f</sub> 0.45 (9:1 EtOAc–CH<sub>3</sub>OH); <sup>1</sup>H NMR (400 MHz, CD<sub>3</sub>COCD<sub>3</sub>):  $\delta$  9.16 (d, *J* = 8.5 Hz, 1H, NH), 8.10–8.04 (m, 2H, ArH), 8.00–7.96 (m, 1H, ArH), 7.95–7.90 (m, 1H, ArH), 7.88–7.80 (m, 2H, ArH), 7.77–7.67 (m, 3H, ArH), 7.65–7.53 (m, 7H, ArH), 7.48–7.13 (m, 27H, ArH), 7.10–7.00 (m, 3H, ArH), 5.71 (d, *J* = 5.0 Hz, 1H, H-1''), 5.64 (appt, *J* = 9.6 Hz, 1H, H-4'''), 5.51 (d, *J* = 3.8 Hz, 1H, H-1'''), 5.40 (m, 1H, H-1), 5.22–5.11 (m, 3H, ArCH<sub>2</sub>, NCO<sub>2</sub>CH<sub>2</sub>), 5.07–4.90 (m, 4H, ArCH<sub>2</sub>,

H-1'), 4.87–4.72 (m, 6H), 4.70–4.56 (m, 5H), 3.87–3.74 (m, 3H), 3.69 (dd,  $J = 10.5, 3.8$  Hz, 1H, H-2'''), 3.65–3.54 (m, 4H, OCH<sub>2</sub>, COOCH<sub>3</sub>), 3.50 (s, 3H, COOCH<sub>3</sub>), 3.25–3.08 (m, 2H, NCH<sub>2</sub>), 2.99–2.90 (m, 2H, PhCH<sub>2</sub>CH<sub>2</sub>) 2.65–2.44 (m, 2H, PhCH<sub>2</sub>CH<sub>2</sub>), 1.62–1.40 (m, 4H, 2 X CH<sub>2</sub>), 1.36–1.24 (m, 2H, CH<sub>2</sub>), 1.01 (s, 9H, (CH<sub>3</sub>)<sub>3</sub>C); <sup>13</sup>C NMR (100 MHz, CD<sub>3</sub>COCD<sub>3</sub>): δ 170.4 (C=O), 165.6 (C=O), 158.4 (q,  $J = 36.5$  Hz, COCF<sub>3</sub>), 140.6, 139.8, 139.42, 139.38, 139.3, 138.8, 137.7, 136.4, 136.3, 134.3, 134.2, 133.9, 133.82, 133.77, 130.8, 130.6, 130.54, 130.47, 129.6, 129.3, 129.2, 129.0, 128.9, 128.8, 128.60, 128.58, 128.52, 128.47, 128.41, 128.36, 128.23, 128.19, 127.9, 127.4, 126.9, 126.7, 126.4, 117.2 (q,  $J = 288$  Hz, COCF<sub>3</sub>), 101.9 (C-1'), 100.6 (C-1), 99.4 (C-1''), 97.6 (C-1'''), 78.5, 77.7, 75.6, 75.0, 74.3, 73.5, 72.7, 72.3, 72.2, 71.3, 70.3, 68.9 (OCH<sub>2</sub>), 67.7, 67.2 (NCOCH<sub>2</sub>), 63.8, 63.1, 60.5, 55.7, 52.8 (CO<sub>2</sub>CH<sub>3</sub>), 52.3 (CO<sub>2</sub>CH<sub>3</sub>), 33.0 (t,  $^2J_{C,F} = 21.4$  Hz, CH<sub>2</sub>CF<sub>2</sub>), 27.1 (CH<sub>3</sub>)<sub>3</sub>C), 26.6 (t,  $^3J_{C,F} = 4.0$  Hz, CH<sub>2</sub>CH<sub>2</sub>CF<sub>2</sub>), 24.4, 19.7 (CH<sub>3</sub>)<sub>3</sub>C); HRMS (ESI-TOF)  $m/z$  [M – 2Na + H]<sup>–</sup> calcd for C<sub>118</sub>H<sub>120</sub>F<sub>16</sub>N<sub>5</sub>O<sub>31</sub>S<sub>2</sub>Si 2498.6921; Found 2498.6931.

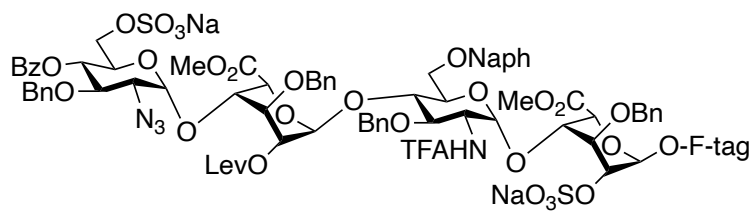

**S7**

***N*-(Benzyl)-3,3,4,4,5,5,6,6,7,7,8,8,8-tridecafluorooctyl-benzoyloxycarbonyl-5-aminopentyl (2-azido-3-*O*-benzyl-4-*O*-benzoyl-2-deoxy-6-*O*-sulfonato- $\alpha$ -D-glucopyranosyl)-(1 $\rightarrow$ 4)-(methyl 3-*O*-benzyl-2-*O*-levulinoyl- $\alpha$ -L-idopyranosyluronate)-(1 $\rightarrow$ 4)-(3-*O*-benzyl-2-deoxy-6-*O*-2-naphthylmethyl-2-trifluoroacetamido- $\alpha$ -D-glucopyranosyl)-(1 $\rightarrow$ 4)-(methyl 3-*O*-benzyl-2-*O*-sulfonato- $\alpha$ -L-idopyranosyluronate (S7).**

Compound **83** (75 mg, 0.034 mmol) was treated according to the general procedure for TBDPS deprotection to give tetrasaccharide **S7** (70 mg, 85%);  $R_f$  0.65 (4:1 EtOAc–CH<sub>3</sub>OH); <sup>1</sup>H NMR (400 MHz, CD<sub>3</sub>OD): δ 7.98–7.85 (m, 4H, ArH), 7.83–7.79 (m, 1H, ArH),

7.79–7.74 (m, 1H, ArH) 7.63–7.52 (m, 2H, ArH), 7.51–7.03 (m, 28H, ArH), 5.35–5.25 (m, 2H, H-1", H-4'''), 5.19–5.04 (m, 5H, H-1, H-1', H-1''', NCO<sub>2</sub>CH<sub>2</sub>), 5.01 (m, 1H, H-2''), 4.91–4.86 (m, 2H), 4.81–4.64 (m, 7H), 4.58 (d, *J* = 11.5 Hz, 1H, ArCH<sub>2</sub>), 4.53–4.46 (m, 3H), 4.46–4.35 (m, 3H), 4.30 (dd, *J* = 10.5, 3.5 Hz, 1H, H-2'), 4.19–3.96 (m, 8H), 3.91–3.83 (m, 1H), 3.83–3.63 (m, 6H, OCH<sub>2</sub>, COOCH<sub>3</sub>), 3.54–3.37 (m, 5H, H-2''', COOCH<sub>3</sub>, OCH<sub>2</sub>), 3.21–3.08 (m, 2H, NCH<sub>2</sub>), 2.93–2.86 (m, 2H, PhCH<sub>2</sub>CH<sub>2</sub>), 2.67–2.60 (m, 2H, CH<sub>3</sub>COCH<sub>2</sub>CH<sub>2</sub>), 2.59–2.34 (m, 4H, CH<sub>3</sub>COCH<sub>2</sub>CH<sub>2</sub>, PhCH<sub>2</sub>CH<sub>2</sub>), 2.04 (s, 3H, CH<sub>3</sub>COCH<sub>2</sub>CH<sub>2</sub>), 1.57–1.39 (m, 4H, 2 X CH<sub>2</sub>), 1.35–1.16 (m, 2H, CH<sub>2</sub>); <sup>13</sup>C NMR (100 MHz, CD<sub>3</sub>OD) δ 208.8 (CH<sub>3</sub>C=O), 173.7 (C=O), 171.7 (C=O), 171.1 (C=O), 166.6 (C=O), 139.3, 139.2, 138.9, 138.7, 137.1, 134.8, 134.6, 134.4, 130.8, 130.8, 129.9, 129.68, 129.67, 129.6, 129.50, 129.56, 129.24, 129.21, 129.19, 129.13, 129.10, 129.0, 128.8, 128.75, 128.70, 128.67, 128.4, 128.2, 127.6, 127.2, 127.1, 126.9, 126.3, 101.2 (C-1), 98.9 (C-1''), 97.8 (C-1'''), 96.1 (C-1'), 79.2, 78.7, 76.3, 75.7, 75.4, 74.2, 73.8, 73.2, 73.0, 72.9, 72.8, 71.8, 71.5 (C-4'''), 71.1, 70.5, 69.4 (C-2''), 69.2 (OCH<sub>2</sub>), 69.0, 68.1, 67.6 (NCOCH<sub>2</sub>), 67.0, 64.3 (C-2'''), 55.1 (C-2'), 53.0 (COOCH<sub>3</sub>), 52.8 (COOCH<sub>3</sub>), 51.5, 49.6, 49.4, 49.3, 49.2, 49.1, 49.0, 48.8, 48.6, 48.4, 38.5 (CH<sub>3</sub>COCH<sub>2</sub>CH<sub>2</sub>), 36.9, 33.6 (t, <sup>2</sup>*J*<sub>C,F</sub> = 21.4 Hz, CH<sub>2</sub>CF<sub>2</sub>), 31.6, 30.2 (CH<sub>2</sub>), 29.7 (CH<sub>3</sub>C=O), 28.8 (CH<sub>2</sub>), 28.5 (CH<sub>3</sub>COCH<sub>2</sub>CH<sub>2</sub>), 27.0 (t, <sup>3</sup>*J*<sub>C,F</sub> = 4.0 Hz, CH<sub>2</sub>CH<sub>2</sub>CF<sub>2</sub>), 24.6 (CH<sub>2</sub>); HRMS (ESI-TOF) *m/z* [M – 2Na + H]<sup>–</sup> calcd for C<sub>107</sub>H<sub>108</sub>F<sub>16</sub>N<sub>5</sub>O<sub>33</sub>S<sub>2</sub> 2358.6113; Found 2358.6106.

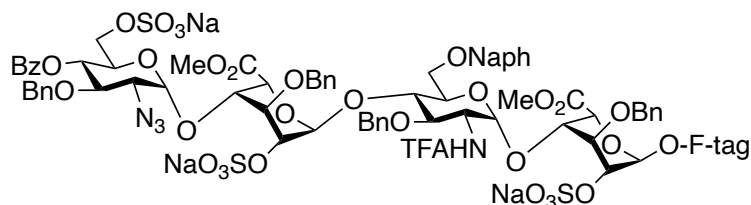

**S8**

***N*-(Benzyl)-3,3,4,4,5,5,6,6,7,7,8,8,8-tridecafluorooctyl-benzylloxycarbonyl-5-aminopentyl (2-azido-3-*O*-benzyl-4-*O*-benzoyl-2-deoxy-6-*O*-sulfonato- $\alpha$ -D-glucopyranosyl)-(1 $\rightarrow$ 4)-(methyl 3-*O*-benzyl-2-*O*-sulfonato- $\alpha$ -L-**

**idopyranosyluronate)-(1→4)-(3-O-benzyl-2-deoxy-6-O-2-naphthylmethyl-2-trifluoroacetamido- $\alpha$ -D-glucopyranosyl)-(1→4)-(methyl 3-O-benzyl-2-O-sulfonato- $\alpha$ -L-idopyranosyluronate (**S8**).**

Compound **84** (69 mg, 0.033 mmol) was treated according to the general procedure of TBDPS deprotection to give tetrasaccharide **S8** (64 mg, 81%);  $R_f$  0.61 (4:1 EtOAc-CH<sub>3</sub>OH); <sup>1</sup>H NMR (400 MHz, CD<sub>3</sub>OD)  $\delta$  7.97–7.92 (m, 2H, ArH), 7.88–7.82 (m, 1H, ArH), 7.78–7.71 (m, 2H, ArH), 7.60–7.53 (m, 4H, ArH), 7.50–6.99 (m, 25H, ArH), 5.51 (bs, 1H, H-1''), 5.24 (appt,  $J = 9.6$  Hz, 1H, H-4'''), 5.17 (d,  $J = 3.3$  Hz, 1H, H-1'''), 5.15–5.04 (m, 4H, H-1, H-1''', NCO<sub>2</sub>CH<sub>2</sub>), 4.97–4.86 (m, 3H), 4.81–4.63 (m, 13H), 4.32 (dd,  $J = 10.5, 3.3$  Hz, 1H, H-2'), 4.19–3.96 (m, 9H), 3.91–3.83 (m, 1H), 3.81–3.66 (m, 6H), 3.52–3.32 (m, 5H, H-2''', OCH<sub>2</sub>, COOCH<sub>3</sub>), 3.22–3.07 (m, 2H, NCH<sub>2</sub>), 2.94–2.84 (m, 2H, PhCH<sub>2</sub>CH<sub>2</sub>) 2.52–2.30 (m, 2H, PhCH<sub>2</sub>CH<sub>2</sub>), 1.65–1.40 (m, 4H, 2 X CH<sub>2</sub>), 1.36–1.20 (m, 2H, CH<sub>2</sub>); <sup>13</sup>C NMR (100 MHz, CD<sub>3</sub>OD):  $\delta$  171.7 (C=O), 166.9 (C=O), 164.8 (C=O), 139.12, 139.10, 139.04, 138.98, 137.1, 134.8, 134.5, 134.4, 130.9, 130.7, 129.64, 129.60, 129.56, 129.4, 129.3, 129.2, 129.1, 129.04, 128.99, 128.64, 128.62, 128.56, 128.2, 127.8, 127.2, 127.0, 126.7, 117.0 (q,  $J = 288$  Hz, COCF<sub>3</sub>), 101.1 (C-1), 100.0 (C-1''), 98.7 (C-1'''), 95.5 (C-1'), 79.3, 79.1, 76.4, 76.2, 75.1, 74.0, 73.9, 73.5, 73.1, 72.9, 72.0 (C-4'''), 71.5, 71.1, 71.1, 70.6, 69.0 (OCH<sub>2</sub>), 68.3, 68.1, 67.6, 67.1 (NCOCH<sub>2</sub>), 65.0 (C-2'''), 55.1 (C-2'), 53.1 (COOCH<sub>3</sub>), 52.9 (COOCH<sub>3</sub>), 33.5 (t,  $^2J_{C,F} = 21.4$  Hz, CH<sub>2</sub>CF<sub>2</sub>), 28.9 (CH<sub>2</sub>), 28.5 (CH<sub>2</sub>), 27.4 (t,  $^3J_{C,F} = 4.0$  Hz, CH<sub>2</sub>CH<sub>2</sub>CF<sub>2</sub>), 24.5 (CH<sub>2</sub>); HRMS (ESI-TOF)  $m/z$  [M – 3Na + 2H]<sup>+</sup> calcd for C<sub>102</sub>H<sub>102</sub>F<sub>16</sub>N<sub>5</sub>O<sub>34</sub>S<sub>3</sub> 2340.5313; Found 2340.5317.

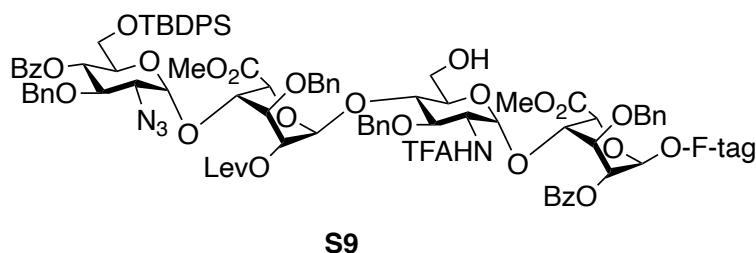

***N*-(Benzyl)-3,3,4,4,5,5,6,6,7,7,8,8,8-tridecafluorooctyl-benzoyloxycarbonyl-5-aminopentyl (2-azido-3-*O*-benzyl-4-*O*-benzoyl-2-deoxy-6-*O*-*tert*-butyldiphenylsilyl- $\alpha$ -D-glucopyranosyl)-(1 $\rightarrow$ 4)-(methyl 3-*O*-benzyl-2-*O*-levulinoyl- $\alpha$ -L-idopyranosyluronate)-(1 $\rightarrow$ 4)-(3-*O*-benzyl-2-deoxy-2-trifluoroacetamido- $\alpha$ -D-glucopyranosyl)-(1 $\rightarrow$ 4)-(methyl 3-*O*-benzyl-2-*O*-benzoyl- $\alpha$ -L-idopyranosyluronate. (S9).**

Compound **77** (0.20 g, 0.079 mmol) was treated according to the general procedure for Nap deprotection to give tetrasaccharide **S9** (0.17 g, 89%);  $R_f$  0.38 (1:1 hexanes/EtOAc);  $^1\text{H}$  NMR (400 MHz,  $\text{CDCl}_3$ ):  $\delta$  8.03–7.94 (m, 4H, Ar), 7.66–7.44 (m, 10H, Ar), 7.37–7.11 (m, 33H, Ar), 6.94–6.92 (m, 2H, Ar), 6.11 (d,  $J = 8.0$  Hz, 1H, NH), 5.55 (t,  $J = 9.5$  Hz, 1H, H-4'''), 5.43 (d,  $J = 4.3$  Hz, 1H, H-1''), 5.20–5.04 (m, 7H, H-1''', H-1', H-1, H-2, H-2'',  $\text{NCO}_2\text{CH}_2$ ), 4.86–4.73 (m, 6H), 4.62–4.46 (m, 5H), 4.19–3.87 (m, 12H), 3.79 (s, 3H,  $\text{OCH}_3$ ), 3.78–3.67 (m, 3H), 3.52–3.44 (m, 3H), 3.46 (s, 3H,  $\text{OCH}_3$ ), 3.25–3.13 (m, 2H,  $\text{NCH}_2$ ), 2.95–2.91 (m, 2H,  $\text{PhCH}_2\text{CH}_2$ ), 2.82–2.79 (m, 2H,  $\text{CH}_2$ ), 2.65–2.32 (m, 4H,  $\text{CH}_2$ ,  $\text{PhCH}_2\text{CH}_2$ ), 2.20 (s, 3H,  $\text{CH}_3\text{C}=\text{O}$ ), 1.60–1.48 (m, 4H, 2 X  $\text{CH}_2$ ), 1.35–1.27 (m, 2H,  $\text{CH}_2$ ), 1.01 (s, 9H,  $(\text{CH}_3)_3\text{C}$ );  $^{13}\text{C}$  NMR (100 MHz,  $\text{CDCl}_3$ ):  $\delta$  206.8 ( $\text{CH}_3\text{C}=\text{OCH}_2$ ), 172.2, 169.7, 169.4, 165.4, 164.8, 156.4 (q,  $^2J_{\text{C,F}} = 37.0$  Hz,  $\text{CF}_3\text{C}=\text{O}$ ), 138.8, 137.5, 137.3, 137.1, 137.1, 135.6, 135.5, 133.8, 133.3, 133.0, 132.9, 129.7, 129.7, 129.6, 129.6, 129.6, 129.0, 128.5, 128.4, 128.3, 128.2, 128.1, 128.0, 127.9, 127.7, 127.6, 127.5, 127.4, 127.1, 115.4 (q,  $^1J_{\text{C,F}} = 287$  Hz,  $\text{CF}_3$ ), 99.1 (C-1), 98.1 (C-1''), 97.7 (C-1'), 96.6 (C-1'''), 74.6, 74.1, 73.3, 73.2, 72.6, 71.4, 70.2, 67.9, 66.8, 63.1, 62.2, 60.6, 60.4, 52.9, 52.4, 51.9, 50.5, 50.2, 38.0, 32.9 (t,  $^2J_{\text{C,F}} = 22.3$  Hz,  $\text{CH}_2\text{CF}_2$ ), 29.8 ( $\text{CH}_3\text{C}=\text{O}$ ), 29.1, 27.9, 26.7 ( $(\text{CH}_3)_3\text{C}$ ), 26.2 (t,  $^3J_{\text{C,F}} = 4.0$  Hz,  $\text{CH}_2\text{CH}_2\text{CF}_2$ ), 23.3, 21.1, 19.1 ( $(\text{CH}_3)_3\text{C}$ ); HRMS (ESI-TOF)  $m/z$   $[\text{M} + \text{H}]^+$  calcd for  $\text{C}_{119}\text{H}_{123}\text{F}_{16}\text{N}_5\text{O}_{28}\text{Si}$  2402.7947; Found 2402.7932.

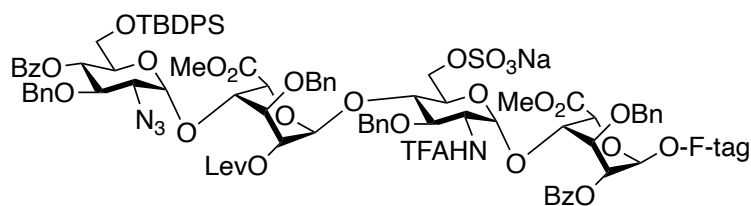

**S10**

***N*-(Benzyl)-3,3,4,4,5,5,6,6,7,7,8,8,8-tridecafluorooctyl-benzoyloxycarbonyl-5-aminopentyl (2-azido-3-*O*-benzyl-4-*O*-benzoyl-2-deoxy-6-*O*-*tert*-butyldiphenylsilyl- $\alpha$ -D-glucopyranosyl)-(1 $\rightarrow$ 4)-(methyl 3-*O*-benzyl-2-*O*-levulinoyl- $\alpha$ -L-idopyranosyluronate)-(1 $\rightarrow$ 4)-(3-*O*-benzyl-2-deoxy-6-*O*-sulfonato-2-trifluoroacetamido- $\alpha$ -D-glucopyranosyl)-(1 $\rightarrow$ 4)-(methyl 3-*O*-benzyl-2-*O*-benzoyl- $\alpha$ -L-idopyranosyluronate (S10).**

Compound **S9** (90 mg, 0.037 mmol) was treated according to the general procedure for *O*-sulfation to give tetrasaccharide **S1** (93 mg, 99%);  $R_f$  0.21 (13:1 CH<sub>2</sub>Cl<sub>2</sub>/CH<sub>3</sub>OH); <sup>1</sup>H NMR (400 MHz, CD<sub>3</sub>COCD<sub>3</sub>):  $\delta$  8.09–7.99 (m, 4H, ArH), 7.75–7.66 (m, 3H, ArH), 7.63–7.48 (m, 7H, ArH), 7.48–7.42 (m, 2H, ArH), 7.42–7.02 (m, 28H, ArH), 5.66 (t,  $J$  = 9.7 Hz, 1H, H-4'''), 5.56 (d,  $J$  = 2.7 Hz, 1H, H-1''), 5.32 (d,  $J$  = 3.5 Hz, 1H, H-1'''), 5.28–5.16 (m, 4H, H-1, H-2, H-1', H-2''), 5.16–5.09 (m, 2H, NCO<sub>2</sub>CH<sub>2</sub>), 4.96–4.82 (m, 4H), 4.81–4.70 (m, 4H, PhCH<sub>2</sub>), 4.64 (d,  $J$  = 10.8 Hz, 1H, PhCH<sub>2</sub>), 4.47 (m, 2H, NCH<sub>2</sub>Ph), 4.44–4.37 (m, 2H), 4.33–4.15 (m, 7H), 4.13–4.02 (m, 2H), 3.98–3.92 (m, 1H, H-5'''), 3.86–3.72 (m, 7H), 3.55–3.43 (m, 4H), 3.20–3.08 (m, 2H, NCH<sub>2</sub>), 2.98–2.65 (m, 6H, PhCH<sub>2</sub>CH<sub>2</sub>, CH<sub>2</sub>), 2.61–2.46 (m, 2H, PhCH<sub>2</sub>CH<sub>2</sub>), 2.08 (s, 3H, CH<sub>3</sub>C=O), 1.57–1.43 (m, 4H, 2 X CH<sub>2</sub>), 1.31–1.24 (m, 2H, CH<sub>2</sub>), 0.99 (s, 9H, (CH<sub>3</sub>)<sub>3</sub>C); <sup>13</sup>C NMR (100 MHz, CD<sub>3</sub>COCD<sub>3</sub>):  $\delta$  206.4 (CH<sub>3</sub>C=OCH<sub>2</sub>), 172.0, 170.0, 169.8, 165.0, 164.7, 138.9, 138.6, 138.5, 138.0, 137.87, 137.86, 135.6, 135.4, 133.4, 133.3, 133.0, 132.9, 129.9, 129.8, 129.7, 129.7, 129.6, 128.8, 128.8, 128.5, 128.41, 128.39, 128.18, 128.15, 128.11, 128.07, 128.0, 127.9, 127.8, 127.70, 127.65, 127.6, 127.5, 127.4, 127.1, 126.8, 126.7, 99.1 (C-1), 97.6 (C-1''), 97.3 (C-1'), 97.1 (C-1'''), 77.9, 77.4, 76.4, 74.3, 74.0, 73.8, 72.9, 72.6, 72.2, 71.3 (C-5'''), 71.2, 70.6 (C-2), 70.2 (C-4'''), 69.1, 68.5, 68.4 (C-2''), 66.3, 64.4, 63.1, 62.0, 53.7, 53.6 (C-2'),

51.9 (OCH<sub>3</sub>), 51.8 (OCH<sub>3</sub>), 37.6 (CH<sub>2</sub>C=O), 32.1 (t, <sup>2</sup>J<sub>C,F</sub> = 21.4 Hz, CH<sub>2</sub>CF<sub>2</sub>), 29.7, 29.1, 27.9, 26.2 (CH<sub>3</sub>)<sub>3</sub>C), 25.7 (t, <sup>3</sup>J<sub>C,F</sub> = 4.0 Hz, CH<sub>2</sub>CH<sub>2</sub>CF<sub>2</sub>), 23.1, 18.8 (CH<sub>3</sub>)<sub>3</sub>C); HRMS (ESI-TOF) m/z [M – Na]<sup>–</sup> calcd for C<sub>119</sub>H<sub>122</sub>F<sub>16</sub>N<sub>5</sub>O<sub>31</sub>SSi 2480.7358; Found 2480.7378.

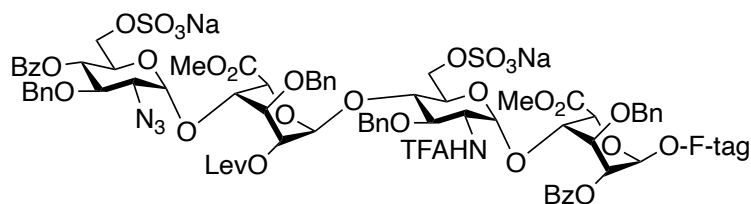

**S12**

***N*-(Benzyl)-3,3,4,4,5,5,6,6,7,7,8,8,8-tridecafluorooctyl-benzoyloxycarbonyl-5-aminopentyl (2-azido-3-*O*-benzyl-4-*O*-benzoyl-2-deoxy-6-*O*-sulfonato- $\alpha$ -D-glucopyranosyl)-(1 $\rightarrow$ 4)-(methyl 3-*O*-benzyl-2-*O*-levulinoyl- $\alpha$ -L-idopyranosyluronate)-(1 $\rightarrow$ 4)-(3-*O*-benzyl-2-deoxy-6-*O*-sulfonato-2-trifluoroacetamido- $\alpha$ -D-glucopyranosyl)-(1 $\rightarrow$ 4)-(methyl 3-*O*-benzyl-2-*O*-benzoyl- $\alpha$ -L-idopyranosyluronate (S12).**

Compound **S9** (85 mg, 0.035 mmol) was treated according to the general procedures for TBDPS deprotection and *O*-sulfation to give tetrasaccharide **S12** (81 mg, 97% over two steps); *R*<sub>f</sub> 0.52 (4:1 EtOAc/CH<sub>3</sub>OH); <sup>1</sup>H NMR (400 MHz, CD<sub>3</sub>OD):  $\delta$  7.92–6.92 (m, 34H, ArH), 5.24 (bs, 1H, H-1''), 5.17 (t, *J* = 9.7 Hz, 1H, H-4'''), 5.10–4.93 (m, 7H, H-1, H-2, H-1', H-2'', H-1'''), NCO<sub>2</sub>CH<sub>2</sub>), 4.88–4.73 (m, 3H), 4.67–4.41 (m, 6H, PhCH<sub>2</sub>), 4.36–4.16 (m, 6H), 4.1–4.06 (m, 1H), 4.04–3.81 (m, 7H), 3.78 (s, 3H, COOCH<sub>3</sub>), 3.72–3.60 (m, 1H, OCH<sub>2</sub>), 3.54 (t, *J* = 9.7 Hz, 1H, H-3''), 3.45 (dd, *J* = 10.2, 3.6 Hz, 1H, H-2'''), 3.38–3.30 (m, 4H, COOCH<sub>3</sub>, OCH<sub>2</sub>), 3.12–2.93 (m, 2H, NCH<sub>2</sub>), 2.88–2.67 (m, 4H, PhCH<sub>2</sub>CH<sub>2</sub>, CH<sub>2</sub>), 2.08 (s, 3H, CH<sub>3</sub>C=O), 1.51–1.24 (m, 4H, 2 X CH<sub>2</sub>), 1.17–1.02 (m, 2H, CH<sub>2</sub>); <sup>13</sup>C NMR (100 MHz, CD<sub>3</sub>COCD<sub>3</sub>):  $\delta$  208.3 (CH<sub>3</sub>C=OCH<sub>2</sub>), 172.4, 170.4, 170.1, 165.6, 165.3, 137.59, 137.56, 137.4, 137.3, 134.03, 134.01, 133.3, 133.2, 132.5, 132.3, 130.1, 129.5, 129.41, 129.36, 128.5, 128.4, 128.23, 128.18, 128.12, 128.08, 128.0, 127.9, 127.83, 127.78, 127.7, 127.5, 127.44, 127.38, 127.04, 126.8, 99.0 (C-1), 97.8 (C-1''), 96.2 (C-1'''),

95.7 (C-1'), 77.5 (C-3'''), 77.3 (C-3''), 75.0, 74.3, 74.2, 73.7, 72.7, 72.6, 72.5, 71.6, 71.1, 70.8, 70.5, 69.3, 69.2, 68.5, 67.9, 67.8 (C-2''), 66.8, 65.9, 65.4, 63.1 (C-2'''), 53.3, 52.0 (OCH<sub>3</sub>), 51.7 (OCH<sub>3</sub>), 37.4 (CH<sub>2</sub>C=O), 32.2 (t, <sup>2</sup>J<sub>C,F</sub> = 21.4 Hz, CH<sub>2</sub>CF<sub>2</sub>), 28.7, 28.3, 27.6, 25.7 (t, <sup>3</sup>J<sub>C,F</sub> = 4.0 Hz, CH<sub>2</sub>CH<sub>2</sub>CF<sub>2</sub>), 23.0, 18.5 (CH<sub>3</sub>)<sub>3</sub>C); HRMS (ESI-TOF) m/z [M – 2Na + 3H]<sup>+</sup> calcd for C<sub>103</sub>H<sub>105</sub>F<sub>16</sub>N<sub>5</sub>O<sub>34</sub>S<sub>2</sub> 2324.5906; Found 2324.5930.

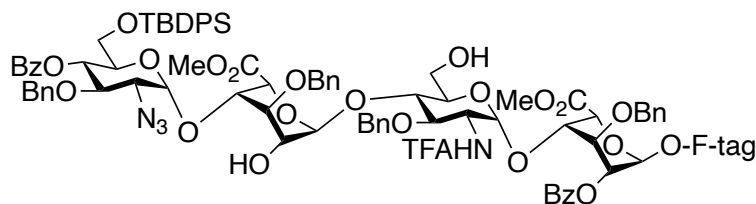

**S13**

***N*-(Benzyl)-3,3,4,4,5,5,6,6,7,7,8,8,8-tridecafluorooctyl-benzoyloxycarbonyl-5-aminopentyl (2-azido-3-*O*-benzyl-4-*O*-benzoyl-2-deoxy-6-*O*-*tert*-butyldiphenylsilyl- $\alpha$ -D-glucopyranosyl)-(1 $\rightarrow$ 4)-(methyl 3-*O*-benzyl- $\alpha$ -L-idopyranosyluronate)-(1 $\rightarrow$ 4)-(3-*O*-benzyl-2-deoxy-2-trifluoroacetamido- $\alpha$ -D-glucopyranosyl)-(1 $\rightarrow$ 4)-(methyl 3-*O*-benzyl-2-*O*-benzoyl- $\alpha$ -L-idopyranosyluronate (S13).**

Compound **S9** (0.17 g, 0.068 mmol) was treated according to the general procedure for Lev deprotection to give tetrasaccharide **S13** (0.15 g, 95%); *R*<sub>f</sub> 0.48 (1:1 hexanes/EtOAc); <sup>1</sup>H NMR (400 MHz, CDCl<sub>3</sub>):  $\delta$  8.03–7.96 (m, 4H, Ar), 7.68–7.15 (m, 43H, Ar), 6.94–6.92 (m, 2H, Ar), 6.12 (d, *J* = 8.6 Hz, 1H, NH), 5.55 (t, *J* = 9.5 Hz, 1H, H-4'''), 5.34 (d, *J* = 2.1 Hz, 1H, H-1''), 5.22 (t, *J* = 2.8 Hz, 1H, H-2), 5.18–5.15 (m, 2H, NCO<sub>2</sub>CH<sub>2</sub>), 5.10 (d, *J* = 2.0 Hz, 1H, H-1), 5.06 (d, *J* = 3.7 Hz, 1H, H-1'''), 5.00 (d, *J* = 3.6 Hz, 1H, H-1'), 4.87–4.71 (m, 6H), 4.62–4.46 (m, 5H), 4.20–4.08 (m, 4H), 4.02–3.87 (m, 7H), 3.82 (s, 3H, OCH<sub>3</sub>), 3.81–3.67 (m, 6H), 3.55–3.46 (m, 2H), 3.29 (s, 3H, OCH<sub>3</sub>), 3.25–3.13 (m, 2H, NCH<sub>2</sub>), 2.95–2.91 (m, 2H, PhCH<sub>2</sub>CH<sub>2</sub>), 2.46–2.32 (m, 2H, PhCH<sub>2</sub>CH<sub>2</sub>), 1.60–1.48 (m, 4H, 2 X CH<sub>2</sub>), 1.35–1.27 (m, 2H, CH<sub>2</sub>), 1.03 (s, 9H, (CH<sub>3</sub>)<sub>3</sub>C); <sup>13</sup>C NMR (100 MHz, CDCl<sub>3</sub>):  $\delta$  169.6, 169.4, 165.4, 164.7, 156.6 (q, <sup>2</sup>J<sub>C,F</sub> = 37.0 Hz, CF<sub>3</sub>C=O), 138.9, 137.4, 137.2, 137.0, 136.9, 135.7, 135.6, 133.8, 133.4, 133.1, 132.9, 129.7, 129.6, 129.6, 129.6, 129.2,



128.9, 128.8, 128.6, 128.6, 128.5, 128.4, 128.3, 128.2, 128.1, 128.0, 127.9, 127.8, 127.6, 127.6, 127.3, 127.1, 126.7, 115.4 (q,  $^1J_{C,F} = 287$  Hz,  $CF_3$ ), 101.5 (C-1''), 99.2 (C-1), 97.9 (C-1'''), 95.6 (C-1'), 78.6, 75.5, 75.2, 74.6, 73.9, 73.3, 73.2, 72.9, 72.7, 72.6, 71.9, 71.4, 70.1, 68.8, 68.5, 67.8, 66.8, 63.3, 61.9, 61.1, 52.7, 52.4, 51.9, 50.5, 50.2, 47.2, 46.1, 32.9 (t,  $^2J_{C,F} = 22.3$  Hz,  $CH_2CF_2$ ), 29.1, 27.9, 26.7 ( $(CH_3)_3C$ ), 26.2 (t,  $^3J_{C,F} = 4.0$  Hz,  $CH_2CH_2CF_2$ ), 23.3, 19.2( $(CH_3)_3C$ ); HRMS (ESI-TOF)  $m/z$   $[M + H]^+$  calcd for  $C_{114}H_{117}F_{16}N_5O_{26}Si$  2304.7578; Found 2304.7563.

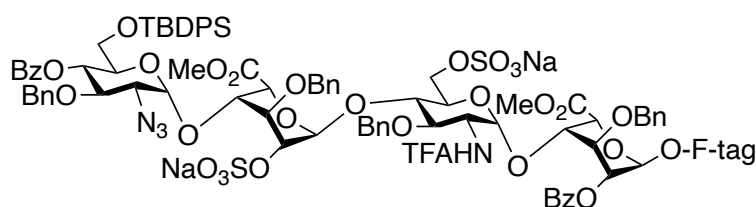

**S14**

***N*-(Benzyl)-3,3,4,4,5,5,6,6,7,7,8,8,8-tridecafluorooctyl-benzoyloxycarbonyl-5-aminopentyl (2-azido-3-*O*-benzyl-4-*O*-benzoyl-2-deoxy-6-*O*-*tert*-butyldiphenylsilyl- $\alpha$ -D-glucopyranosyl)-(1 $\rightarrow$ 4)-(methyl 3-*O*-benzyl-2-*O*-sulfonato- $\alpha$ -L-idopyranosyluronate)-(1 $\rightarrow$ 4)-(3-*O*-benzyl-2-deoxy-6-*O*-sulfonato-2-trifluoroacetamido- $\alpha$ -D-glucopyranosyl)-(1 $\rightarrow$ 4)-(methyl 3-*O*-benzyl-2-*O*-benzoyl- $\alpha$ -L-idopyranosyluronate (S14).**

Compound **S13** (67 mg, 0.029 mmol) was treated according to the general procedure for *O*-sulfation to give tetrasaccharide **S14** (66 mg, 90%);  $R_f$  0.19 (14:1 DCM/MeOH);  $^1H$  NMR (400 MHz,  $CD_3OD$ ):  $\delta$  7.97–7.90 (m, 6H, Ar), 7.67–7.63 (m, 3H, Ar), 7.54–7.06 (m, 39H, NH, Ar), 6.96–6.94 (m, 2H, Ar), 5.49 (t,  $J = 9.8$  Hz, 1H, H-4'''), 5.47 (s, 1H, H-1''), 5.20–5.09 (m, 6H), 4.98–4.80 (m, 4H), 4.68–4.56 (m, 6H), 4.43–4.32 (m, 8H), 4.15–4.02 (m, 4H), 3.94–3.91 (m, 1H), 3.87 (s, 3H,  $OCH_3$ ), 3.83–3.71 (m, 2H), 3.68–3.63 (m, 3H), 3.53 (dd,  $J = 10.2, 3.2$  Hz, 1H, H-2'''), 3.49–3.40 (m, 1H), 3.18 (s, 3H,  $OCH_3$ ), 3.14–3.04 (m, 2H,  $NCH_2$ ), 2.92–2.88 (m, 2H,  $PhCH_2CH_2$ ), 2.50–2.38 (m, 2H,  $PhCH_2CH_2$ ), 1.60–1.48 (m, 4H, 2 X  $CH_2$ ), 1.35–1.27 (m, 2H,  $CH_2$ ), 0.96 (s, 9H,  $(CH_3)_3C$ );  $^{13}C$  NMR (100 MHz,

CDCl<sub>3</sub>): δ 170.4, 170.2, 165.6, 165.2, 157.7 (q, <sup>2</sup>J<sub>C,F</sub> = 37.0 Hz, CF<sub>3</sub>C=O), 137.7, 137.7, 137.6, 137.4, 135.4, 135.3, 133.2, 133.2, 132.8, 132.8, 129.7, 129.5, 129.4, 129.4, 129.3, 128.4, 128.4, 128.2, 128.2, 128.1, 128.1, 128.0, 127.8, 127.7, 127.6, 127.5, 127.4, 127.4, 127.3, 127.3, 126.9, 126.7, 126.4, 115.7 (q, <sup>1</sup>J<sub>C,F</sub> = 287 Hz, CF<sub>3</sub>), 98.9 (C-1''), 98.2 (C-1), 96.5 (C-1'''), 95.1 (C-1'), 78.0, 77.6, 74.7, 74.7, 74.0, 72.7, 72.6, 72.4, 71.8, 71.5, 71.4, 71.2, 71.0, 70.4, 69.9, 69.4, 69.2, 68.5, 67.0, 66.8, 65.8, 63.8, 62.2, 54.7, 53.3, 52.1, 51.3, 50.1, 50.0, 46.1, 32.2 (t, <sup>2</sup>J<sub>C,F</sub> = 22.3 Hz, CH<sub>2</sub>CF<sub>2</sub>), 28.6, 27.4, 25.9 (CH<sub>3</sub>)<sub>3</sub>C, 25.7 (t, <sup>3</sup>J<sub>C,F</sub> = 4.0 Hz, CH<sub>2</sub>CH<sub>2</sub>CF<sub>2</sub>), 22.9, 18.6 (CH<sub>3</sub>)<sub>3</sub>C); HRMS (ESI-TOF) m/z [M - Na]<sup>+</sup> calcd for C<sub>114</sub>H<sub>115</sub>F<sub>16</sub>N<sub>5</sub>O<sub>32</sub>SiNa 2484.6377; Found 2484.6377.

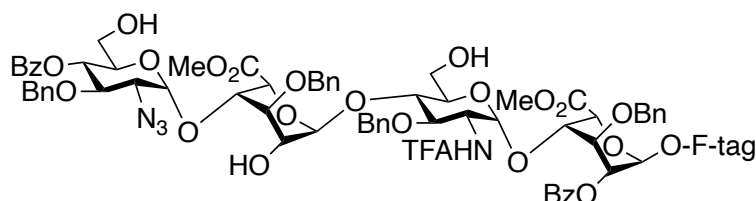

**S15**

***N*-(Benzyl)-3,3,4,4,5,5,6,6,7,7,8,8,8-tridecafluorooctyl-benzoyloxycarbonyl-5-aminopentyl (2-azido-3-*O*-benzyl-4-*O*-benzoyl-2-deoxy- $\alpha$ -D-glucopyranosyl)-(1 $\rightarrow$ 4)-(methyl 3-*O*-benzyl- $\alpha$ -L-idopyranosyluronate)-(1 $\rightarrow$ 4)-(3-*O*-benzyl-2-deoxy-2-trifluoroacetamido- $\alpha$ -D-glucopyranosyl)-(1 $\rightarrow$ 4)-(methyl 3-*O*-benzyl-2-*O*-benzoyl- $\alpha$ -L-idopyranosyluronate (S15).**

Compound **S13** (80 mg, 0.035 mmol) was treated according to the general procedure for TBDPS deprotection to give tetrasaccharide **S15** (67 mg, 93%); *R*<sub>f</sub> 0.21 (1:1 hexanes/EtOAc); <sup>1</sup>H NMR (400 MHz, CDCl<sub>3</sub>): δ 8.03–7.98 (m, 4H, Ar), 7.66–7.62 (m, 1H, Ar), 7.50–7.10 (m, 32H, Ar), 6.95–6.93 (m, 2H, Ar), 6.21 (d, *J* = 8.1 Hz, 1H, NH), 5.32 (s, 1H, H-1''), 5.22 (t, *J* = 2.4 Hz, 1H, H-2), 5.20–5.14 (m, 2H, H-4''', NCO<sub>2</sub>CH<sub>2</sub>), 5.11 (d, *J* = 1.6 Hz, 1H, H-1), 5.04 (d, *J* = 3.7 Hz, 1H, H-1'''), 4.99 (d, *J* = 3.5 Hz, 1H, H-1'), 4.90–4.59 (m, 8H), 4.51–4.47 (m, 3H), 4.23–3.73 (m, 16H), 3.68–3.45 (m, 7H), 3.38 (s, 3H, OCH<sub>3</sub>), 3.25–3.13 (m, 2H, NCH<sub>2</sub>), 2.94–2.90 (m, 2H, PhCH<sub>2</sub>CH<sub>2</sub>), 2.46–2.32 (m, 2H, PhCH<sub>2</sub>CH<sub>2</sub>),

1.60–1.48 (m, 4H, 2 X CH<sub>2</sub>), 1.35–1.27 (m, 2H, CH<sub>2</sub>); <sup>13</sup>C NMR (100 MHz, CDCl<sub>3</sub>): 169.6, 169.5, 166.4, 165.4, 156.8 (q, <sup>2</sup>J<sub>C,F</sub> = 37.0 Hz, CF<sub>3</sub>C=O), 138.9, 137.9, 137.3, 137.1, 136.9, 136.9, 134.0, 133.8, 129.9, 129.6, 129.2, 128.9, 128.8, 128.8, 128.6, 128.6, 128.5, 128.4, 128.4, 128.3, 128.2, 128.1, 128.1, 128.0, 128.0, 127.8, 127.4, 127.1, 126.7, 115.4 (q, <sup>1</sup>J<sub>C,F</sub> = 287 Hz, CF<sub>3</sub>), 101.5 (C-1''), 99.2 (C-1), 97.9 (C-1'), 95.8 (C-1'''), 78.3, 77.6, 77.4, 77.3, 77.1, 76.8, 76.7, 75.7, 75.2, 74.2, 74.0, 73.3, 73.2, 72.9, 72.9, 72.6, 72.5, 71.1, 71.0, 68.9, 67.9, 66.8, 63.3, 61.1, 60.6, 52.8, 52.4, 52.1, 50.5, 50.2, 47.1, 46.2, 32.9 (t, <sup>2</sup>J<sub>C,F</sub> = 22.3 Hz, CH<sub>2</sub>CF<sub>2</sub>), 29.1, 27.5, 26.2 (t, <sup>3</sup>J<sub>C,F</sub> = 4.0 Hz, CH<sub>2</sub>CH<sub>2</sub>CF<sub>2</sub>), 23.3; HRMS (ESI-TOF) m/z [M + H]<sup>+</sup> calcd for C<sub>98</sub>H<sub>99</sub>F<sub>16</sub>N<sub>5</sub>O<sub>26</sub> 2066.6401; Found 2066.6401.

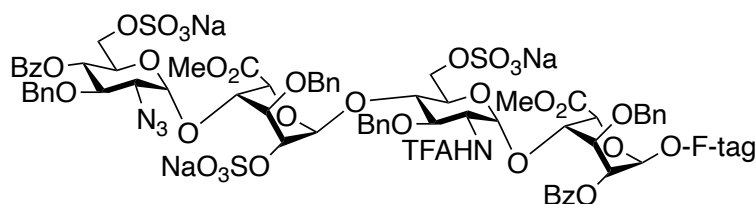

**S16**

***N*-(Benzyl)-3,3,4,4,5,5,6,6,7,7,8,8,8-tridecafluorooctyl-benzoyloxycarbonyl-5-aminopentyl (2-azido-3-*O*-benzyl-4-*O*-benzoyl-2-deoxy-6-*O*-sulfonato- $\alpha$ -D-glucopyranosyl)-(1 $\rightarrow$ 4)-(methyl 3-*O*-benzyl-2-*O*-sulfonato- $\alpha$ -L-idopyranosylurionate)-(1 $\rightarrow$ 4)-(3-*O*-benzyl-2-deoxy-6-*O*-sulfonato-2-trifluoroacetamido- $\alpha$ -D-glucopyranosyl)-(1 $\rightarrow$ 4)-(methyl 3-*O*-benzyl-2-*O*-benzoyl- $\alpha$ -L-idopyranosylurionate (S16).**

Compound **S15** (70 mg, 0.029 mmol) was treated according to the general procedure for *O*-sulfation to give tetrasaccharide **S16** (74 mg, 92%); *R*<sub>f</sub> 0.38 (6:1 DCM/MeOH); <sup>1</sup>H NMR (400 MHz, CD<sub>3</sub>OD):  $\delta$  8.19–8.17 (m, 2H, Ar), 8.04–8.02 (m, 3H, Ar), 7.60–7.11 (m, 36H, NH, Ar), 5.77 (s, 1H, H-1''), 5.27–5.23 (m, 3H, H-2, H-1', H-1), 5.13 (br, 2H, NCH<sub>2</sub>), 5.07–4.93 (m, 5H, H-1''', H-4''', H-5, H-5'', CH<sub>2</sub>Ph), 4.66–4.58 (m, 2H), 4.52–4.37 (m, 8H), 4.28–4.14 (m, 5H), 4.06 (dd, *J* = 10.1, 2.7 Hz, 1H, H-2'''), 3.88–3.76 (m, 6H), 3.64 (dd, *J* = 11.9, 2.6 Hz, 1H, H-2'''), 3.53 (s, 3H, OCH<sub>3</sub>), 3.53–3.43 (m, 1H), 3.18 (s, 3H, OCH<sub>3</sub>), 3.17–3.08

(m, 2H, NCH<sub>2</sub>), 2.92–2.88 (m, 2H, PhCH<sub>2</sub>CH<sub>2</sub>), 2.59–2.47 (m, 2H, PhCH<sub>2</sub>CH<sub>2</sub>), 1.60–1.48 (m, 4H, 2 X CH<sub>2</sub>), 1.35–1.27 (m, 2H, CH<sub>2</sub>); <sup>13</sup>C NMR (100 MHz, CDCl<sub>3</sub>): δ 170.7, 169.8, 165.6, 165.0, 157.7 (q, <sup>2</sup>J<sub>C,F</sub> = 37.0 Hz, CF<sub>3</sub>C=O), 138.9, 138.6, 138.3, 138.1, 137.9, 133.4, 133.2, 130.1, 129.8, 129.8, 129.6, 128.8, 128.6, 128.5, 128.4, 128.3, 128.2, 128.2, 128.1, 128.0, 127.9, 127.7, 127.5, 127.4, 127.3, 127.1, 127.0, 115.7 (q, <sup>1</sup>J<sub>C,F</sub> = 287 Hz, CF<sub>3</sub>), 99.1 (C-1), 98.1 (C-1''), 97.9 (C-1'''), 97.3 (C-1'), 78.0, 77.4, 76.7, 74.9, 74.2, 73.7, 73.2, 72.8, 72.4, 72.0, 71.9, 71.1, 71.0, 69.7, 69.5, 68.5, 67.3, 66.5, 66.3, 65.8, 64.7, 54.6, 53.8, 52.1, 52.0, 50.0, 49.8, 46.8, 46.0, 32.1 (t, <sup>2</sup>J<sub>C,F</sub> = 22.3 Hz, CH<sub>2</sub>CF<sub>2</sub>), 29.0, 27.6, 25.7 (t, <sup>3</sup>J<sub>C,F</sub> = 4.0 Hz, CH<sub>2</sub>CH<sub>2</sub>CF<sub>2</sub>), 23.1; HRMS (ESI-TOF) m/z [M - 3Na + 2H]<sup>-</sup> calcd for C<sub>98</sub>H<sub>98</sub>F<sub>16</sub>N<sub>5</sub>O<sub>35</sub>S<sub>3</sub> 2304.4949; Found 2304.4946.

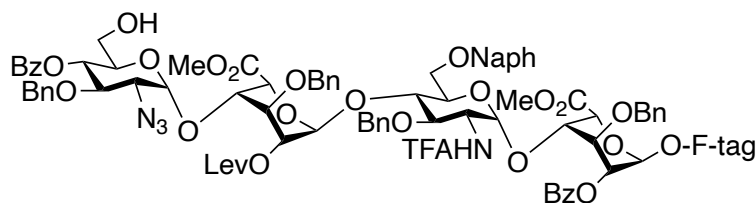

**S17**

***N*-(Benzyl)-3,3,4,4,5,5,6,6,7,7,8,8,8-tridecafluorooctyl-benzoyloxycarbonyl-5-aminopentyl (2-azido-3-*O*-benzyl-4-*O*-benzoyl-2-deoxy- $\alpha$ -D-glucopyranosyl)-(1 $\rightarrow$ 4)-(methyl 3-*O*-benzyl-2-*O*-levulinoyl- $\alpha$ -L-idopyranosyluronate)-(1 $\rightarrow$ 4)-(3-*O*-benzyl-2-deoxy-6-*O*-2-naphthylmethyl-2-trifluoroacetamido- $\alpha$ -D-glucopyranosyl)-(1 $\rightarrow$ 4)-(methyl 3-*O*-benzyl-2-*O*-benzoyl- $\alpha$ -L-idopyranosyluronate (S17).**

Compound **76** (0.30 g, 0.12 mmol) was treated according to the general procedure for TBDPS deprotection to give tetrasaccharide **S17** (0.26 g, 95%); <sup>1</sup>H NMR (400 MHz, CD<sub>3</sub>COCD<sub>3</sub>): δ 8.38 (d, *J* = 8.9 Hz, 1H, NH), 8.07–7.87 (m, 8H, Ar), 7.70–7.66 (m, 2H, Ar), 7.58–7.16 (m, 36H, Ar), 5.57 (d, *J* = 5.6 Hz, 1H, H-1''), 5.34–5.28 (m, 3H, H-1''', H-4''', H-1), 5.26 (d, *J* = 3.6 Hz, 1H, H-1'), 5.21 (dd, *J* = 5.2, 4.3 Hz, 1H, H-2), 5.13 (br, 2H, NCO<sub>2</sub>CH<sub>2</sub>), 5.09 (t, *J* = 5.9 Hz, 1H, H-2''), 4.93–4.66 (m, 11H), 4.47 (s, 2H, NCH<sub>2</sub>Ph), 4.41–4.36 (m, 2H), 4.32–4.04 (m, 9H), 3.93 (dd, *J* = 11.2, 1.3 Hz, 1H), 3.85–3.80 (m, 2H),

3.77–3.74 (m, 1H), 3.74 (s, 3H, OCH<sub>3</sub>), 3.66 (s, 3H, OCH<sub>3</sub>), 3.66–3.59 (m, 3H), 3.48–3.43 (m, 1H), 3.17–3.10 (m, 2H, NCH<sub>2</sub>), 2.98–2.94 (m, 2H, PhCH<sub>2</sub>CH<sub>2</sub>), 2.67–2.37 (m, 6H, CH<sub>2</sub>), 2.05 (s, 3H, CH<sub>3</sub>C=O), 1.60–1.48 (m, 4H, 2 X CH<sub>2</sub>), 1.35–1.27 (m, 2H, CH<sub>2</sub>), 1.01 (s, 9H, (CH<sub>3</sub>)<sub>3</sub>C); <sup>13</sup>C NMR (100 MHz, CD<sub>3</sub>COCD<sub>3</sub>): δ 205.6 (CH<sub>3</sub>C=OCH<sub>2</sub>), 171.6, 169.7, 169.4, 165.2, 165.0, 156.9 (q, <sup>2</sup>J<sub>C,F</sub> = 37.0 Hz, CF<sub>3</sub>C=O), 138.9, 138.8, 138.6, 138.3, 138.0, 137.8, 136.3, 133.5, 133.3, 133.1, 129.8, 129.7, 129.6, 129.6, 128.8, 128.8, 128.5, 128.4, 128.3, 128.2, 128.1, 128.1, 128.0, 127.9, 127.9, 127.8, 127.7, 127.6, 127.6, 127.5, 127.4, 127.0, 126.6, 126.4, 126.0, 125.8, 115.8 (q, <sup>1</sup>J<sub>C,F</sub> = 287 Hz, CF<sub>3</sub>), 99.0 (C-1), 98.3 (C-1''), 97.8 (C-1'''), 97.6 (C-1'), 77.5, 77.3, 76.6, 76.4, 76.3, 74.2, 74.2, 73.8, 73.8, 73.3, 73.2, 72.8, 72.0, 71.7, 71.4, 71.2, 70.8, 70.8, 69.3, 68.3, 67.8, 66.3, 62.9, 60.9, 60.8, 53.6 (C-2'), 51.6 (OCH<sub>3</sub>), 51.5 (OCH<sub>3</sub>), 50.0, 49.8, 37.2 (CH<sub>2</sub>C=O), 32.2 (t, <sup>2</sup>J<sub>C,F</sub> = 22.3 Hz, CH<sub>2</sub>CF<sub>2</sub>), 29.5, 29.4, 29.4, 29.1, 29.0, 27.7 (t, <sup>3</sup>J<sub>C,F</sub> = 4.0 Hz, CH<sub>2</sub>CH<sub>2</sub>CF<sub>2</sub>), 25.7, 23.1; HRMS (ESI-TOF) m/z [M + H]<sup>+</sup> calcd for C<sub>114</sub>H<sub>113</sub>F<sub>16</sub>N<sub>5</sub>O<sub>28</sub> 2304.7395; Found 2304.7388.

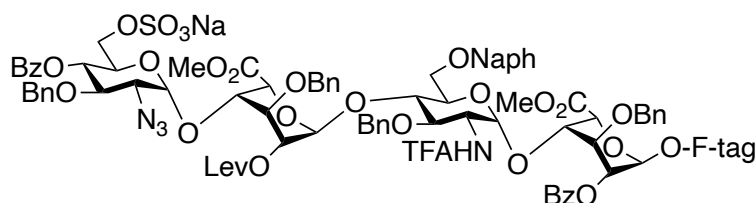

**S18**

***N*-(Benzyl)-3,3,4,4,5,5,6,6,7,7,8,8,8-tridecafluorooctyl-benzoyloxycarbonyl-5-aminopentyl (2-azido-3-*O*-benzyl-4-*O*-benzoyl-2-deoxy-6-*O*-sulfonato- $\alpha$ -D-glucopyranosyl)-(1 $\rightarrow$ 4)-(methyl 3-*O*-benzyl-2-*O*-levulinoyl- $\alpha$ -L-idopyranosyluronate)-(1 $\rightarrow$ 4)-(3-*O*-benzyl-2-deoxy-6-*O*-2-naphthylmethyl-2-trifluoroacetamido- $\alpha$ -D-glucopyranosyl)-(1 $\rightarrow$ 4)-(methyl 3-*O*-benzyl-2-*O*-benzoyl- $\alpha$ -L-idopyranosyluronate (S18).**

Compound **S17** (80 mg, 0.035 mmol) was treated according to the general procedure for *O*-sulfation to give tetrasaccharide **S18** (77 mg, 92%); *R*<sub>f</sub> 0.19 (14:1 DCM/MeOH); <sup>1</sup>H NMR (400 MHz, CD<sub>3</sub>COCD<sub>3</sub>): δ 8.50 (s, 1H, NH), 8.07–7.87 (m, 10H, Ar), 7.68–7.15 (m,

36H, Ar), 5.47 (d,  $J = 4.0$  Hz, 1H, H-1''), 5.36–5.28 (m, 4H, H-1''', H-4''', H-1, H-1''), 5.23 (dd,  $J = 5.2, 4.3$  Hz, 1H, H-2), 5.13 (br, 2H, NCO<sub>2</sub>CH<sub>2</sub>), 5.11 (t,  $J = 4.5$  Hz, 1H, H-2''), 4.94 (d,  $J = 2.5$  Hz, 1H), 4.90–4.83 (m, 5H), 4.78–4.70 (m, 4H), 4.61 (d,  $J = 11.2$  Hz, 1H), 4.48 (d,  $J = 11.2$  Hz, 1H), 4.47 (s, 2H, NCH<sub>2</sub>Ph), 4.41 (t,  $J = 4.8$  Hz, 1H), 4.37 (t,  $J = 5.0$  Hz, 1H), 4.32–4.13 (m, 6H), 4.10–3.86 (m, 6H), 3.85–3.80 (m, 2H), 3.76 (s, 3H, OCH<sub>3</sub>), 3.76–3.73 (m, 1H), 3.66–3.62 (m, 1H), 3.61 (s, 3H, OCH<sub>3</sub>), 3.52–3.43 (m, 1H), 3.18–3.08 (m, 2H, NCH<sub>2</sub>), 2.98–2.94 (m, 2H, PhCH<sub>2</sub>CH<sub>2</sub>), 2.75–2.46 (m, 6H), 2.06 (s, 3H, CH<sub>3</sub>C=O), 1.60–1.48 (m, 4H, 2 X CH<sub>2</sub>), 1.35–1.27 (m, 2H, CH<sub>2</sub>); <sup>13</sup>C NMR (100 MHz, CD<sub>3</sub>COCD<sub>3</sub>): 205.8 (CH<sub>3</sub>C=OCH<sub>2</sub>), 171.8, 169.7, 169.4, 165.3, 165.0, 162.0, 157.1 (q, <sup>2</sup> $J_{C,F} = 37.0$  Hz, CF<sub>3</sub>C=O), 138.9, 138.6, 138.6, 138.2, 138.0, 137.8, 136.3, 133.5, 133.1, 129.8, 129.7, 129.7, 129.6, 128.8, 128.7, 128.5, 128.4, 128.3, 128.2, 128.1, 128.0, 128.0, 127.9, 127.9, 127.6, 127.6, 127.5, 127.4, 127.2, 127.0, 126.4, 126.2, 126.0, 125.7, 115.9 (q, <sup>1</sup> $J_{C,F} = 287$  Hz, CF<sub>3</sub>), 99.0 (C-1), 98.5 (C-1''), 97.4 (C-1'), 97.2 (C-1'''), 77.5, 77.3, 76.6, 76.0, 75.3, 74.1, 73.7, 73.3, 73.2, 72.8, 72.2, 72.1, 71.1, 71.0, 70.0, 69.6, 68.4, 68.0, 66.3, 65.0, 62.8, 53.6, 51.7, 50.1, 49.8, 46.8, 46.1, 37.3 (CH<sub>2</sub>C=O), 32.2 (t, <sup>2</sup> $J_{C,F} = 22.3$  Hz, CH<sub>2</sub>CF<sub>2</sub>), 27.8 (t, <sup>3</sup> $J_{C,F} = 4.0$  Hz, CH<sub>2</sub>CH<sub>2</sub>CF<sub>2</sub>), 25.7, 23.1; HRMS (ESI-TOF)  $m/z$  [M -Na]<sup>-</sup> calcd for C<sub>114</sub>H<sub>112</sub>F<sub>16</sub>N<sub>5</sub>O<sub>31</sub>S 2382.6807; Found 2382.6821.

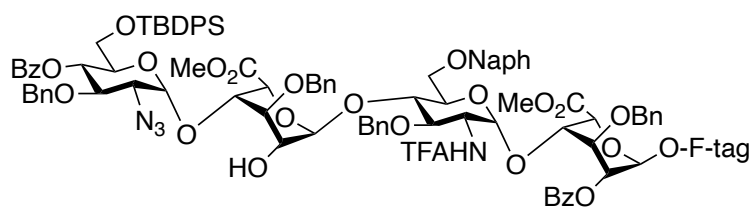

**S19**

***N*-(Benzyl)-3,3,4,4,5,5,6,6,7,7,8,8,8-tridecafluorooctyl-benzoyloxycarbonyl-5-aminopentyl (2-azido-3-*O*-benzyl-4-*O*-benzoyl-2-deoxy-6-*O*-*tert*-butyldiphenylsilyl- $\alpha$ -D-glucopyranosyl)-(1→4)-(methyl 3-*O*-benzyl- $\alpha$ -L-idopyranosyluronate)-(1→4)-(3-*O*-benzyl-2-deoxy-6-*O*-2-naphthylmethyl-2-trifluoroacetamido- $\alpha$ -D-**

**glucopyranosyl)-(1→4)-(methyl 3-O-benzyl-2-O-benzoyl- $\alpha$ -L-idopyranosyluronate (S19).**

Compound **76** (0.11 g, 0.045 mmol) was treated according to the general procedure for Lev deprotection to give tetrasaccharide **S19** (0.10 g, 95%);  $R_f$  0.32 (2:1 hexanes/EtOAc);  $^1\text{H}$  NMR (400 MHz,  $\text{CD}_3\text{COCD}_3$ ):  $\delta$  8.11–6.95 (m, 51H, ArH), 5.64 (t,  $J = 9.4$  Hz, 1H, H-4'''), 5.52 (d,  $J = 5.4$  Hz, 1H, H-1''), 5.47 (d,  $J = 3.8$  Hz, 1H, H-1'''), 5.28 (d,  $J = 3.5$  Hz, 1H, H-1'), 5.27 (appt,  $J = 3.5$  Hz, 1H, H-2), 5.20 (d,  $J = 3.5$  Hz, 1H, H-1), 5.18–5.10 (m, 2H,  $\text{NCO}_2\text{CH}_2$ ), 5.00 (d,  $J = 11.2$  Hz, 1H,  $\text{ArCH}_2$ ), 4.94–4.70 (m, 9H,  $\text{ArCH}_2$ ), 4.63 (d,  $J = 10.6$  Hz, 1H,  $\text{ArCH}_2$ ), 4.49 (s, 2H,  $\text{NCH}_2\text{Ph}$ ), 4.45–4.35 (m, 2H), 4.31–4.10 (m, 7H), 4.08–3.94 (m, 3H), 3.93–3.70 (m, 9H), 3.56–3.41 (m, 4H,  $\text{OCH}_3$ ), 3.24–3.09 (m, 2H,  $\text{NCH}_2$ ), 3.02–2.93 (m, 2H,  $\text{PhCH}_2\text{CH}_2$ ), 2.64–2.44 (m, 2H,  $\text{PhCH}_2\text{CH}_2$ ), 2.10 (s, 3H,  $\text{CH}_3\text{C}=\text{O}$ ), 1.57–1.43 (m, 4H, 2 X  $\text{CH}_2$ ), 1.34–1.23 (m, 2H,  $\text{CH}_2$ ), 1.02 (s, 9H,  $(\text{CH}_3)_3\text{C}$ );  $^{13}\text{C}$  NMR (100 MHz,  $\text{CD}_3\text{COCD}_3$ ):  $\delta$  170.3, 170.2, 165.9, 165.5, 139.84, 139.80, 139.6, 139.5, 138.9, 138.6, 137.3, 136.5, 136.3, 134.4, 134.3, 134.2, 134.0, 133.91, 133.85, 130.8, 130.7, 130.58, 130.55, 130.46, 129.7, 129.6, 129.34, 129.28, 129.1, 129.04, 129.02, 128.94, 128.90, 128.87, 128.8, 128.7, 128.59, 128.56, 128.53, 128.47, 128.4, 128.3, 127.6, 127.5, 127.2, 127.0, 126.8, 126.6, 102.4 (C-1'''), 100.0 (C-1), 98.6 (C-1'), 97.9 (C-1'''), 78.9, 78.6, 78.4, 77.7, 77.0, 75.3, 75.2, 74.5, 74.3, 74.1, 73.3, 73.1, 72.5, 72.4, 72.1, 71.7, 71.2 (C-4'''), 70.9 (C-2), 69.6, 69.1, 69.0, 67.1, 64.0, 63.0, 54.6, 54.5, 52.4, 52.3, 33.0 (t,  $^2J_{\text{C},\text{F}} = 21.4$  Hz,  $\text{CH}_2\text{CF}_2$ ), 27.1 ( $(\text{CH}_3)_3\text{C}$ ), 26.6 (t,  $^3J_{\text{C},\text{F}} = 4.0$  Hz,  $\text{CH}_2\text{CH}_2\text{CF}_2$ ), 24.0, 19.7 ( $(\text{CH}_3)_3\text{C}$ ); HRMS (ESI-TOF)  $m/z$   $[\text{M} + \text{H}]^+$  calcd for  $\text{C}_{125}\text{H}_{125}\text{F}_{16}\text{N}_5\text{O}_{26}\text{Si}$  2444.8206; Found 2444.8201.

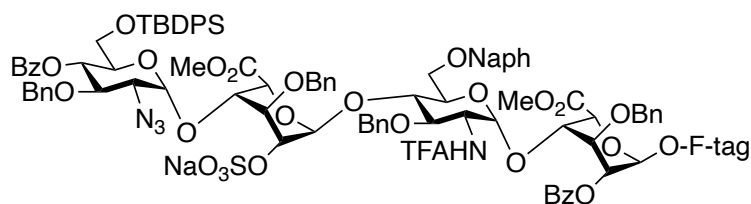

**S20**

***N*-(Benzyl)-3,3,4,4,5,5,6,6,7,7,8,8,8-tridecafluorooctyl-benzyloxycarbonyl-5-aminopentyl (2-azido-3-*O*-benzyl-4-*O*-benzoyl-2-deoxy-6-*O*-*tert*-butyldiphenylsilyl- $\alpha$ -D-glucopyranosyl)-(1 $\rightarrow$ 4)-(methyl 3-*O*-benzyl-2-*O*-sulfonato- $\alpha$ -L-idopyranosyluronate)-(1 $\rightarrow$ 4)-(3-*O*-benzyl-2-deoxy-6-*O*-2-naphthylmethyl-2-trifluoroacetamido- $\alpha$ -D-glucopyranosyl)-(1 $\rightarrow$ 4)-(methyl 3-*O*-benzyl-2-*O*-benzoyl- $\alpha$ -L-idopyranosyluronate, mono sodium salt (S20).**

Compound **S19** (0.10 g, 0.041 mmol) was treated according to the general procedure for Lev deprotection to give tetrasaccharide **S20** (99 mg, 99%);  $R_f$  0.32 (2:1 hexanes/EtOAc);  $^1\text{H}$  NMR (400 MHz,  $\text{CD}_3\text{COCD}_3$ ):  $\delta$  8.07–7.91 (m, 6H, ArH), 7.85–7.77 (m, 2H, ArH), 7.76–7.71 (m, 2H, ArH), 7.70–7.60 (m, 4H, ArH), 7.59–7.07 (m, 35H, ArH), 5.64 (bs, 1H, H-1''), 5.57 (appt,  $J = 9.6$  Hz, 1H, H-4'''), 5.48 (d,  $J = 3.2$  Hz, 1H, H-1'''), 5.30 (d,  $J = 3.6$  Hz, 1H, H-1'), 5.28–5.22 (m, 2H, H-1, H-2), 5.17–5.11 (m, 2H,  $\text{NCO}_2\text{CH}_2$ ), 5.02–4.92 (m, 4H), 4.88–4.68 (m, 7H), 4.63 (d,  $J = 10.6$  Hz, 1H,  $\text{ArCH}_2$ ), 4.60–4.53 (m, 2H), 4.47 (s, 2H,  $\text{NCH}_2\text{Ph}$ ), 4.41 (appt,  $J = 5.1$  Hz, 1H), 4.38–4.26 (m, 3H), 4.23–4.10 (m, 4H), 4.04–3.94 (m, 2H), 3.92–3.84 (m, 1H), 3.82–3.67 (m, 6H,  $\text{OCH}_2$ ,  $\text{COOCH}_3$ ), 3.62 (dd,  $J = 10.3, 3.4$  Hz, 1H, H-2'''), 3.52–3.37 (m, 4H,  $\text{OCH}_2$ ,  $\text{COOCH}_3$ ), 3.18–3.05 (m, 2H,  $\text{NCH}_2$ ), 3.02–2.93 (m, 2H,  $\text{PhCH}_2\text{CH}_2$ ) 2.64–2.44 (m, 2H,  $\text{PhCH}_2\text{CH}_2$ ), 2.10 (s, 3H,  $\text{CH}_3\text{C}=\text{O}$ ), 1.56–1.39 (m, 4H, 2 X  $\text{CH}_2$ ), 1.33–1.15 (m, 2H,  $\text{CH}_2$ ), 1.00 (s, 9H,  $(\text{CH}_3)_3\text{C}$ );  $^{13}\text{C}$  NMR (100 MHz,  $\text{CD}_3\text{COCD}_3$ ):  $\delta$  170.5 (C=O), 170.3 (C=O), 165.9 (C=O), 165.7 (C=O), 139.78, 139.44, 139.36, 139.2, 138.9, 138.8, 137.5, 136.4, 136.3, 134.4, 134.2, 133.9, 133.84, 133.77, 130.8, 130.7, 130.6, 130.52, 130.50, 130.4, 129.62, 129.55, 129.32, 129.27, 129.1, 129.04, 129.01, 128.98, 128.89, 128.86, 128.7, 128.63, 128.59, 128.56, 128.5, 128.4, 128.34, 128.27, 127.9, 127.6, 127.5, 127.4, 127.3, 126.6, 126.4, 100.1 (C-1''), 99.7 (C-1), 98.1 (C-1'), 96.1 (C-1'''), 78.5, 78.4, 77.3, 76.0, 75.0, 74.33, 74.25, 73.7, 73.6, 73.2, 72.9, 72.6, 72.2 (C-2), 71.5 (C-4'''), 71.1, 70.8, 69.3, 69.0, 68.9 ( $\text{OCH}_2$ ), 67.1 ( $\text{NCO}_2\text{CH}_2$ ), 64.0 (C-2'''), 63.3, 54.4, 54.3, 52.6 ( $\text{COOCH}_3$ ), 52.1 ( $\text{COOCH}_3$ ), 50.9 ( $\text{NCH}_2\text{Ph}$ ), 47.7 ( $\text{NCH}_2$ ), 33.2 ( $\text{PhCH}_2\text{CH}_2$ ), 33.0 (t,  $^2J_{\text{C},\text{F}} = 21.4$  Hz,  $\text{CH}_2\text{CF}_2$ ), 27.1 ( $(\text{CH}_3)_3\text{C}$ ), 26.6 (t,  $^3J_{\text{C},\text{F}} = 4.0$  Hz,



CH<sub>2</sub>CH<sub>2</sub>CF<sub>2</sub>), 23.9 (CH<sub>2</sub>), 19.7 (CH<sub>3</sub>)<sub>3</sub>C); HRMS (ESI-TOF) m/z [M – Na + 2H]<sup>+</sup> calcd for C<sub>125</sub>H<sub>124</sub>F<sub>16</sub>N<sub>5</sub>O<sub>29</sub>SSi 2524.7773; Found 2524.7756.

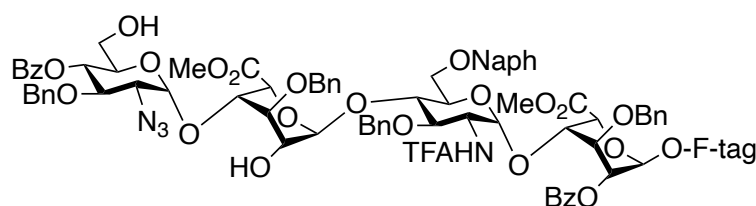

**S21**

***N*-(Benzyl)-3,3,4,4,5,5,6,6,7,7,8,8,8-tridecafluorooctyl-benzoyloxycarbonyl-5-aminopentyl (2-azido-3-*O*-benzyl-4-*O*-benzoyl-2-deoxy- $\alpha$ -D-glucopyranosyl)-(1 $\rightarrow$ 4)-(methyl 3-*O*-benzyl- $\alpha$ -L-idopyranosyluronate)-(1 $\rightarrow$ 4)-(3-*O*-benzyl-2-deoxy-6-*O*-2-naphthylmethyl-2-trifluoroacetamido- $\alpha$ -D-glucopyranosyl)-(1 $\rightarrow$ 4)-(methyl 3-*O*-benzyl-2-*O*-benzoyl- $\alpha$ -L-idopyranosyluronate (S21).**

Compound **S19** (85 mg, 0.035 mmol) was treated according to the general procedure for Lev deprotection to give tetrasaccharide **S21** (75 mg, 98%); *R*<sub>f</sub> 0.52 (1:1 hexanes/EtOAc); <sup>1</sup>H NMR (400 MHz, CD<sub>3</sub>COCD<sub>3</sub>):  $\delta$  8.12–7.87 (m, 8H, ArH), 7.73–7.14 (m, 33H, ArH), 5.57 (d, *J* = 5.5 Hz, 1H, H-1''), 5.43 (d, *J* = 3.4 Hz, 1H, H-1'''), 5.35–5.24 (m, 3H, H-4''', H-1', H-2), 5.19 (d, *J* = 3.5 Hz, 1H, H-1), 5.18–5.12 (m, 2H, NCO<sub>2</sub>CH<sub>2</sub>), 5.01 (d, *J* = 11.2 Hz, 1H, ArCH<sub>2</sub>), 4.97–4.86 (m, 5H, ArCH<sub>2</sub>), 4.86–4.79 (m, 2H, ArCH<sub>2</sub>), 4.78–4.72 (m, 2H, ArCH<sub>2</sub>), 4.66 (d, *J* = 11.0 Hz, 1H, ArCH<sub>2</sub>), 4.49 (s, 2H, NCH<sub>2</sub>Ph), 4.43 (appt, *J* = 3.7 Hz, 1H, H-3'), 4.37 (d, *J* = 11.4 Hz, 1H, ArCH<sub>2</sub>), 4.32–4.21 (m, 5H), 4.19–4.10 (m, 2H), 4.11–3.56 (m, 16H), 3.54–3.40 (m, 1H, OCH<sub>2</sub>), 3.22–3.09 (m, 2H, NCH<sub>2</sub>), 3.00–2.94 (m, 2H, PhCH<sub>2</sub>CH<sub>2</sub>), 2.65–2.46 (m, 2H, PhCH<sub>2</sub>CH<sub>2</sub>), 1.65–1.44 (m, 4H, 2 X CH<sub>2</sub>), 1.39–1.29 (m, 2H, CH<sub>2</sub>); <sup>13</sup>C NMR (100 MHz, CD<sub>3</sub>COCD<sub>3</sub>):  $\delta$  170.5 (C=O), 170.2 (C=O), 166.0 (C=O), 165.9 (C=O), 139.8, 139.8, 139.7, 139.5, 138.9, 138.7, 137.3, 134.4, 134.4, 134.2, 134.0, 130.7, 130.6, 130.5, 129.7, 129.6, 129.3, 129.3, 129.1, 129.0, 129.0, 128.9, 128.9, 128.8, 128.8, 128.7, 128.7, 128.5, 128.5, 128.4, 128.3, 128.2, 128.1, 127.8, 127.2, 127.0, 126.8, 126.6, 102.4 (C-1''), 100.0 (C-1), 98.7 (C-1'), 98.2 (C-1'''), 79.2, 78.6, 78.3, 78.0, 77.0,

75.3 (C-3'), 75.2, 74.8, 74.3, 74.1, 73.3, 73.1, 72.4 (C-4'''), 72.0, 70.8 (C-2), 69.5, 69.1 (OCH<sub>2</sub>), 69.0, 67.1, 63.9, 61.8, 54.6, 52.4, 52.3, 33.2, 33.0 (t, <sup>2</sup>J<sub>C,F</sub> = 21.4 Hz, CH<sub>2</sub>CF<sub>2</sub>), 32.8, 26.6 (t, <sup>3</sup>J<sub>C,F</sub> = 4.0 Hz, CH<sub>2</sub>CH<sub>2</sub>CF<sub>2</sub>), 24.0; HRMS (ESI-TOF) m/z [M + H]<sup>+</sup> calcd for C<sub>109</sub>H<sub>107</sub>F<sub>16</sub>N<sub>5</sub>O<sub>26</sub> 2206.7026; Found 2206.7012.

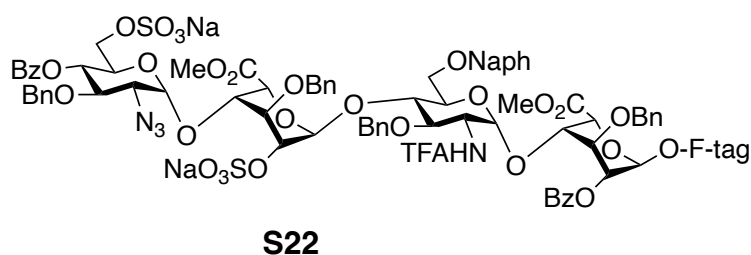

***N*-(Benzyl)-3,3,4,4,5,5,6,6,7,7,8,8,8-tridecafluorooctyl-benzoyloxycarbonyl-5-aminopentyl (2-azido-3-*O*-benzyl-4-*O*-benzoyl-2-deoxy-6-*O*-sulfonato- $\alpha$ -D-glucopyranosyl)-(1 $\rightarrow$ 4)-(methyl 3-*O*-benzyl-2-*O*-sulfonato- $\alpha$ -L-idopyranosylurionate)-(1 $\rightarrow$ 4)-(3-*O*-benzyl-2-deoxy-6-*O*-2-naphthylmethyl-2-trifluoroacetamido- $\alpha$ -D-glucopyranosyl)-(1 $\rightarrow$ 4)-(methyl 3-*O*-benzyl-2-*O*-benzoyl- $\alpha$ -L-idopyranosylurionate disodium salt (S22).**

Compound **S21** (75 mg, 0.034 mmol) was treated according to the general procedure for *O*-sulfation to give tetrasaccharide **S22** (74 mg, 92%); *R*<sub>f</sub> 0.62 (7:2:1 EtOAc/CH<sub>3</sub>OH/H<sub>2</sub>O); <sup>1</sup>H NMR (400 MHz, CD<sub>3</sub>COCD<sub>3</sub>):  $\delta$  8.14–8.09 (m, 2H, ArH), 8.05–7.82 (m, 5H, ArH), 7.87–7.79 (m, 2H, ArH), 7.70–7.10 (m, 32H, ArH), 5.64 (bs, 1H, H-1''), 5.36 (d, *J* = 3.5 Hz, 1H, H-1'''), 5.34–5.22 (m, 4H, H-4''', H-1', H-2, H-1), 5.18–5.12 (m, 2H, NCO<sub>2</sub>CH<sub>2</sub>), 5.03–4.93 (m, 4H), 4.92–4.58 (m, 9H, ArCH<sub>2</sub>), 4.51–4.34 (m, 6H), 4.30 (appt, *J* = 7.6 Hz, 1H), 4.26–4.00 (m, 7H), 4.01–3.88 (m, 2H), 3.82–3.66 (m, 4H, OCH<sub>2</sub>, COOCH<sub>3</sub>), 3.64–3.56 (m, 2H), 3.55–3.41 (m, 4H, OCH<sub>2</sub>, COOCH<sub>3</sub>), 3.23–2.96 (m, 4H, NCH<sub>2</sub>, PhCH<sub>2</sub>CH<sub>2</sub>) 2.66–2.46 (m, 2H, PhCH<sub>2</sub>CH<sub>2</sub>), 1.56–1.39 (m, 4H, 2 X CH<sub>2</sub>), 1.30–1.15 (m, 2H, CH<sub>2</sub>); <sup>13</sup>C NMR (100 MHz, CD<sub>3</sub>COCD<sub>3</sub>):  $\delta$  170.7 (C=O), 170.7 (C=O), 166.2 (C=O), 165.9 (C=O), 163.0 (C=O), 139.8, 139.4, 139.3, 139.2, 138.9, 138.7, 137.5, 134.4, 134.3, 134.2, 133.8, 130.7, 130.6, 130.5, 130.4, 129.56, 129.55, 129.51, 129.31, 129.26, 129.1, 129.02, 129.00, 128.98,

128.95, 128.87, 128.84, 128.80, 128.7, 128.6, 128.38, 128.36, 128.31, 128.28, 128.26, 127.9, 127.73, 127.66, 127.3, 127.2, 126.6, 126.4, 100.6 (C-1''), 99.6 (C-1), 97.6 (C-1'), 97.1 (C-1'''), 79.1, 78.1, 77.4, 76.0, 75.0, 73.8, 73.6, 73.3, 72.9, 72.6, 71.9, 71.4, 71.1, 70.4, 69.3, 67.1, 66.3, 63.8, 54.3, 52.5, 47.2, 36.2, 33.0 (t,  $^2J_{C,F} = 21.4$  Hz, CH<sub>2</sub>CF<sub>2</sub>), 26.6 (t,  $^3J_{C,F} = 4.4$  Hz, CH<sub>2</sub>CH<sub>2</sub>CF<sub>2</sub>), 23.8; HRMS (ESI-TOF) m/z [M - Na]<sup>-</sup> calcd for C<sub>109</sub>H<sub>105</sub>F<sub>16</sub>N<sub>5</sub>O<sub>32</sub>S<sub>2</sub>Na 2386.5825; Found 2386.5825.

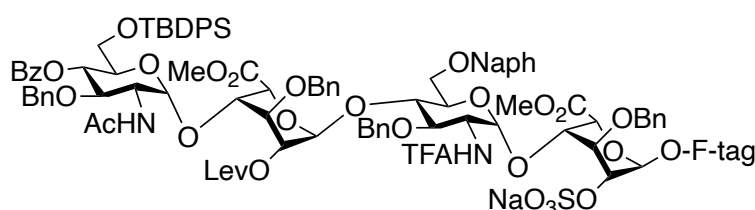

**S23**

***N*-(Benzyl)-3,3,4,4,5,5,6,6,7,7,8,8,8-tridecafluorooctyl-benzoyloxycarbonyl-5-aminopentyl (2-acetamido-3-*O*-benzyl-4-*O*-benzoyl-2-deoxy-6-*O*-tert-butylidiphenylsilyl- $\alpha$ -D-glucopyranosyl)-(1 $\rightarrow$ 4)-(methyl 3-*O*-benzyl-2-*O*-levulinoyl- $\alpha$ -L-idopyranosyluronate)-(1 $\rightarrow$ 4)-(3-*O*-benzyl-2-deoxy-6-*O*-2-naphthylmethyl-2-trifluoroacetamido- $\alpha$ -D-glucopyranosyl)-(1 $\rightarrow$ 4)-(methyl 3-*O*-benzyl-2-*O*-sulfonato- $\alpha$ -L-idopyranosyluronate (S23).**

Compound **77** (82 mg, 0.033 mmol) was treated according to the general procedure for *O*-sulfation to give tetrasaccharide **S23** (78 mg, 92%); *R*<sub>f</sub> 0.63 (6:1 DCM/MeOH); <sup>1</sup>H NMR (400 MHz, CD<sub>3</sub>COCD<sub>3</sub>):  $\delta$  7.98–7.96 (m, 4H, Ar), 7.88–7.85 (m, 1H, Ar), 7.80–7.74 (m, 3H, Ar), 7.67–7.59 (m, 4H, Ar), 7.52–7.03 (m, 39H, Ar), 5.67 (t, *J* = 9.7 Hz, 1H, H-4'''), 5.40 (d, *J* = 2.3 Hz, 1H, H-1''), 5.18 (d, *J* = 3.4 Hz, 1H, H-1'), 5.15–5.13 (br, 2H, NCO<sub>2</sub>CH<sub>2</sub>), 5.09 (t, *J* = 2.8 Hz, 1H, H-2''), 5.00–4.98 (m, 5H), 4.85–4.71 (m, 6H), 4.63–4.48 (m, 7H), 4.43–4.38 (m, 1H), 4.19–4.10 (m, 6H), 4.04–3.78 (m, 8H), 3.73–3.64 (m, 1H), 3.53 (s, 3H, OCH<sub>3</sub>), 3.47–3.37 (m, 1H), 3.34 (s, 3H, OCH<sub>3</sub>), 3.26–3.16 (m, 2H, NCH<sub>2</sub>), 2.98–2.94 (m, 2H, PhCH<sub>2</sub>CH<sub>2</sub>), 2.76–2.46 (m, 6H, CH<sub>2</sub>, PhCH<sub>2</sub>CH<sub>2</sub>), 2.11 (s, 3H, CH<sub>3</sub>C=O), 1.80 (s, 3H, CH<sub>3</sub>C=ON), 1.63–1.53 (m, 4H, 2 X CH<sub>2</sub>), 1.40–1.27 (m, 2H, CH<sub>2</sub>), 1.02 (s, 9H, (CH<sub>3</sub>)<sub>3</sub>C);

$^{13}\text{C}$  NMR (100 MHz,  $\text{CD}_3\text{COCD}_3$ ):  $\delta$  206.4 ( $\text{CH}_3\text{C}=\text{OCH}_2$ ), 171.9, 169.5, 169.4, 168.7, 164.7, 162.0, 157.7 (q,  $^2J_{\text{C},\text{F}} = 37.0$  Hz,  $\text{CF}_3\text{C}=\text{O}$ ), 139.4, 138.7, 138.6, 137.8, 136.4, 135.6, 135.5, 133.5, 133.2, 133.1, 133.0, 133.0, 130.1, 129.7, 129.6, 129.5, 128.7, 128.6, 128.5, 128.4, 128.2, 128.0, 128.0, 128.0, 127.9, 127.8, 127.7, 127.6, 127.5, 127.4, 127.3, 127.2, 126.5, 126.2, 126.0, 126.0, 125.7, 116.1 (q,  $^1J_{\text{C},\text{F}} = 287$  Hz,  $\text{CF}_3$ ), 100.1, 99.7, 97.6, 97.0, 78.1, 77.3, 76.6, 74.8, 73.2, 72.8, 72.7, 72.3, 71.9, 71.8, 71.3, 70.4, 69.8, 68.8, 68.3, 67.7, 66.4, 66.3, 62.3, 55.0, 54.6, 52.5, 51.2, 51.1, 50.0, 49.8, 47.0, 46.1, 37.3 ( $\text{CH}_2\text{C}=\text{O}$ ), 32.1 (t,  $^2J_{\text{C},\text{F}} = 21.6$  Hz,  $\text{CH}_2\text{CF}_2$ ), 29.4, 27.7 ( $\text{CH}_2\text{C}=\text{O}$ ), 26.3 ( $(\text{CH}_3)_3\text{C}$ ), 25.7 (t,  $^3J_{\text{C},\text{F}} = 5.0$  Hz,  $\text{CH}_2\text{CH}_2\text{CF}_2$ ), 23.3, 22.2, 18.9 ( $(\text{CH}_3)_3\text{C}$ ); HRMS (ESI-TOF)  $m/z$   $[\text{M} - \text{Na}]^-$  calcd for  $\text{C}_{125}\text{H}_{130}\text{F}_{16}\text{N}_3\text{O}_{31}\text{SSi}$  2532.7922; Found 2532.7915.

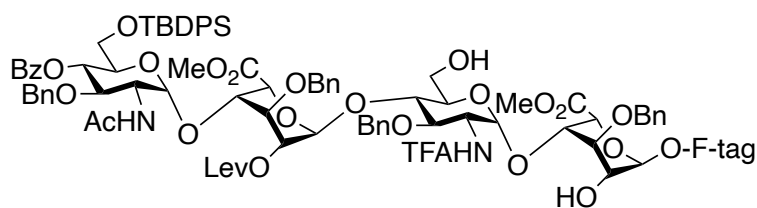

**S24**

***N*-(Benzyl)-3,3,4,4,5,5,6,6,7,7,8,8,8-tridecafluorooctyl-benzoyloxycarbonyl-5-aminopentyl (2-acetamido-3-*O*-benzyl-4-*O*-benzoyl-2-deoxy-6-*O*-tert-butylidiphenylsilyl- $\alpha$ -D-glucopyranosyl)-(1 $\rightarrow$ 4)-(methyl 3-*O*-benzyl-2-*O*-levulinoyl- $\alpha$ -L-idopyranosylurionate)-(1 $\rightarrow$ 4)-(3-*O*-benzyl-2-deoxy-2-trifluoroacetamido- $\alpha$ -D-glucopyranosyl)-(1 $\rightarrow$ 4)-(methyl 3-*O*-benzyl- $\alpha$ -L-idopyranosylurionate (S24).**

Compound **77** (0.14 g, 0.057 mmol) was treated according to the general procedure for Nap deprotection to give tetrasaccharide **S24** (0.13 g, 89%);  $R_f$  0.18 (1:4 hexanes/EtOAc);  $^1\text{H}$  NMR (400 MHz,  $\text{CD}_3\text{COCD}_3$ ):  $\delta$  8.53 (d,  $J = 9.3$  Hz, 1H, NH), 8.01–8.00 (m, 2H, Ar), 7.73–7.53 (m, 7H, Ar), 7.42–7.21 (m, 25H, Ar), 7.18–7.11 (m, 10H, Ar), 5.61 (t,  $J = 9.8$  Hz, 1H, H-4'''), 5.55 (d,  $J = 4.5$  Hz, 1H, H-1''), 5.21–5.13 (m, 4H,  $\text{NCO}_2\text{CH}_2$ , H-1''', H-1'), 5.07 (dd,  $J = 3.4, 2.7$  Hz, 1H, H-2''), 4.96 (s, 1H, H-1), 4.89–4.77 (m, 5H,  $\text{CH}_2\text{Ph}$ , H-5, H-5''), 4.72–4.68 (m, 2H,  $\text{CH}_2\text{Ph}$ ), 4.63–4.54 (m, 2H,  $\text{CH}_2\text{Ph}$ ), 4.51 (s, 2H,  $\text{NCH}_2\text{Ph}$ ), 4.50–4.43

(m, 2H), 4.33 (d,  $J = 3.7$  Hz, 1H), 4.27–4.16 (m, 4H), 4.08–4.03 (m, 1H), 3.99–3.86 (m, 5H), 3.92–3.83 (m, 4H), 3.84–3.65 (m, 8H), 3.52 (s, 3H, OCH<sub>3</sub>), 3.50–3.40 (m, 1H, OCH<sub>2</sub>CH<sub>2</sub>), 3.26–3.17 (m, 2H, NCH<sub>2</sub>), 2.98–2.94 (m, 2H, PhCH<sub>2</sub>CH<sub>2</sub>), 2.87–2.82 (m, 2H, CH<sub>2</sub>), 2.63–2.47 (m, 4H, CH<sub>2</sub>, PhCH<sub>2</sub>CH<sub>2</sub>), 2.15 (s, 3H, CH<sub>3</sub>C=O), 1.96 (s, 3H, CH<sub>3</sub>C=ON), 1.63–1.53 (m, 4H, 2 X CH<sub>2</sub>), 1.40–1.27 (m, 2H, CH<sub>2</sub>), 1.02 (s, 9H, (CH<sub>3</sub>)<sub>3</sub>C); <sup>13</sup>C NMR (100 MHz, CD<sub>3</sub>COCD<sub>3</sub>): δ 206.3 (CH<sub>3</sub>C=OCH<sub>2</sub>), 171.9, 169.8, 169.4, 169.0, 164.7, 157.0 (q, <sup>2</sup> $J_{C,F} = 37.0$  Hz, CF<sub>3</sub>C=O), 139.0, 138.8, 138.6, 138.5, 138.5, 138.0, 135.6, 135.4, 133.3, 133.1, 133.0, 130.1, 129.7, 129.6, 129.5, 128.7, 128.5, 128.4, 128.4, 128.2, 128.0, 127.7, 127.7, 127.6, 127.5, 127.2, 127.1, 126.9, 116.1 (q, <sup>1</sup> $J_{C,F} = 287$  Hz, CF<sub>3</sub>), 101.2 (C-1), 97.6 (C-1''), 96.5 (C-1'''), 95.8 (C-1'), 78.0, 77.9, 74.8, 74.3, 74.2, 73.5, 72.6, 72.4, 72.2, 71.6, 71.3, 71.1, 70.5, 70.4, 70.2, 67.9, 67.4, 66.7, 66.3, 62.5, 60.1, 54.1, 53.6, 52.5, 51.6, 51.3, 50.1, 49.8, 47.0, 46.1, 37.5 (CH<sub>2</sub>C=O), 32.2 (t, <sup>2</sup> $J_{C,F} = 21.6$  Hz, CH<sub>2</sub>CF<sub>2</sub>), 29.1, 28.9, 27.7, 26.3 ((CH<sub>3</sub>)<sub>3</sub>C), 25.7 (t, <sup>3</sup> $J_{C,F} = 5.0$  Hz, CH<sub>2</sub>CH<sub>2</sub>CF<sub>2</sub>), 23.3, 22.3, 18.9 ((CH<sub>3</sub>)<sub>3</sub>C); HRMS (ESI-TOF)  $m/z$  [M + H]<sup>+</sup> calcd for C<sub>114</sub>H<sub>123</sub>F<sub>16</sub>N<sub>3</sub>O<sub>28</sub>Si 2314.7886; Found 2314.7891.

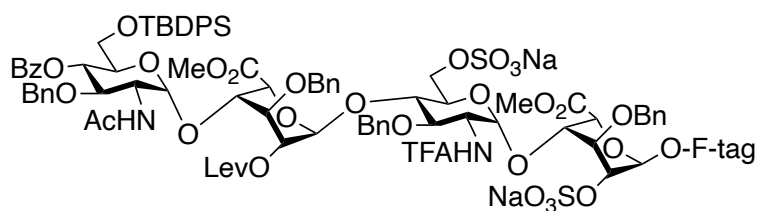

**S25**

***N*-(Benzyl)-3,3,4,4,5,5,6,6,7,7,8,8,8-tridecafluorooctyl-benzoyloxycarbonyl-5-aminopentyl (2-acetamido-3-*O*-benzyl-4-*O*-benzoyl-2-deoxy-6-*O*-*tert*-butyldiphenylsilyl- $\alpha$ -D-glucopyranosyl)-(1→4)-(methyl 3-*O*-benzyl-2-*O*-levulinoyl- $\alpha$ -L-idopyranosyluronate)-(1→4)-(3-*O*-benzyl-2-deoxy-6-*O*-sulfonato-2-trifluoroacetamido- $\alpha$ -D-glucopyranosyl)-(1→4)-(methyl 3-*O*-benzyl-2-*O*-sulfonato- $\alpha$ -L-idopyranosyluronate (S25).**

Compound **S24** (60 mg, 0.026 mmol) was treated according to the general procedure for O-sulfation to give tetrasaccharide **S25** (61 mg, 93%);  $R_f$  0.63 (6:1 DCM/MeOH);  $^1\text{H NMR}$  (400 MHz,  $\text{CD}_3\text{OD}$ ):  $\delta$  9.00 (d,  $J = 9.6$  Hz, 1H, NH), 8.38 (d,  $J = 9.6$  Hz, 1H, NH), 7.87–7.85 (m, 2H, Ar), 7.66–7.63 (m, 2H, Ar), 7.55–7.46 (m, 4H, Ar), 7.35–7.06 (m, 35H, Ar), 5.41 (d,  $J = 2.2$  Hz, 1H, H-1''), 5.35 (t,  $J = 9.6$  Hz, 1H, H-4'''), 5.18 (d,  $J = 3.3$  Hz, 1H, H-1'''), 5.14–5.09 (m, 4H,  $\text{NCO}_2\text{CH}_2$ , H-1, H-2'), 5.06 (d,  $J = 3.2$  Hz, 1H, H-1'), 4.89 (d,  $J = 2.8$  Hz, 1H), 4.86–4.76 (m, 4H), 4.69–4.55 (m, 4H), 4.51–4.44 (m, 4H,  $\text{CH}_2\text{Ph}$ ), 4.37–4.19 (m, 6H), 4.11–4.03 (m, 3H), 3.86–3.65 (m, 10H), 3.52–3.44 (m, 1H,  $\text{OCH}_2\text{CH}_2$ ), 3.39 (s, 3H,  $\text{OCH}_3$ ), 3.20–3.13 (m, 2H,  $\text{NCH}_2$ ), 2.98–2.89 (m, 3H), 2.76 (dt,  $J = 18.7, 5.4$  Hz, 1H), 2.61 (dt,  $J = 17.1, 5.4$  Hz, 1H), 2.54–2.37 (m, 3H,  $\text{CH}_2$ ,  $\text{PhCH}_2\text{CH}_2$ ), 2.15 (s, 3H,  $\text{CH}_3\text{C}=\text{O}$ ), 2.03 (s, 3H,  $\text{CH}_3\text{C}=\text{ON}$ ), 1.63–1.53 (m, 4H, 2 X  $\text{CH}_2$ ), 1.40–1.27 (m, 2H,  $\text{CH}_2$ ), 0.95 (s, 9H,  $(\text{CH}_3)_3\text{C}$ );  $^{13}\text{C NMR}$  (100 MHz,  $\text{CD}_3\text{OD}$ ):  $\delta$  208.3 ( $\text{CH}_3\text{C}=\text{OCH}_2$ ), 172.4, 172.3, 170.5, 169.9, 165.2, 157.0 (q,  $^2J_{\text{C},\text{F}} = 37.0$  Hz,  $\text{CF}_3\text{C}=\text{O}$ ), 138.3, 137.9, 137.9, 137.4, 135.3, 135.2, 133.2, 132.9, 132.7, 129.6, 129.5, 129.4, 129.3, 128.3, 128.2, 128.1, 128.0, 127.9, 127.8, 127.7, 127.6, 127.5, 127.4, 127.4, 127.3, 127.2, 126.9, 126.8, 126.6, 116.1 (q,  $^1J_{\text{C},\text{F}} = 287$  Hz,  $\text{CF}_3$ ), 99.9 (C-1), 97.7 (C-1''), 96.1 (C-1'), 94.5 (C-1'''), 77.6, 77.4, 74.6, 74.2, 74.1, 72.3, 72.2, 71.7, 71.3, 71.0, 70.5, 70.2, 68.9, 68.5, 68.1, 66.7, 66.2, 64.9, 62.9, 53.8, 52.9, 51.9, 51.4, 50.1, 49.9, 46.6, 46.2, 37.4 ( $\text{CH}_2\text{C}=\text{O}$ ), 32.2 (t,  $^2J_{\text{C},\text{F}} = 21.6$  Hz,  $\text{CH}_2\text{CF}_2$ ), 29.4, 28.8, 28.2, 25.9 ( $(\text{CH}_3)_3\text{C}$ ), 25.7 (t,  $^3J_{\text{C},\text{F}} = 5.0$  Hz,  $\text{CH}_2\text{CH}_2\text{CF}_2$ ), 23.2, 22.0, 18.6 ( $(\text{CH}_3)_3\text{C}$ ); HRMS (ESI-TOF)  $m/z$  [ $\text{M} - 2\text{Na} + \text{H}$ ] calcd for  $\text{C}_{114}\text{H}_{122}\text{F}_{16}\text{N}_3\text{O}_{34}\text{Si}$  2472.6865; Found 2472.6877.

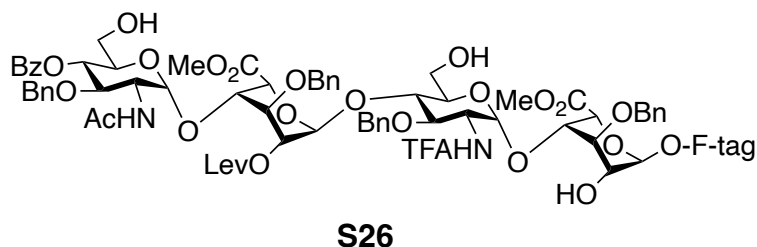

***N*-(Benzyl)-3,3,4,4,5,5,6,6,7,7,8,8,8-tridecafluorooctyl-benzoyloxycarbonyl-5-aminopentyl (2-acetamido-3-*O*-benzyl-4-*O*-benzoyl-2-deoxy- $\alpha$ -D-glucopyranosyl)-(1 $\rightarrow$ 4)-(methyl 3-*O*-benzyl-2-*O*-levulinoyl- $\alpha$ -L-idopyranosyluronate)-(1 $\rightarrow$ 4)-(3-*O*-benzyl-2-deoxy-2-trifluoroacetamido- $\alpha$ -D-glucopyranosyl)-(1 $\rightarrow$ 4)-(methyl 3-*O*-benzyl- $\alpha$ -L-idopyranosyluronate (S26).**

Compound **S24** (73 mg mg, 0.031 mmol) was treated according to the general procedure for TBDPS deprotection to give tetrasaccharide **S26** (61 mg, 94%);  $R_f$  0.10 (1:4 hexanes/EtOAc);  $^1\text{H}$  NMR (400 MHz,  $\text{CD}_3\text{COCD}_3$ ):  $\delta$  8.56 (d,  $J = 9.0$  Hz, 1H, NH), 8.03–8.01 (m, 2H, Ar), 7.76–7.74 (m, 3H, Ar), 7.67–7.64 (m, 1H, Ar), 7.55–7.12 (m, 28H, Ar), 5.51 (d,  $J = 4.1$  Hz, 1H, H-1''), 5.34 (t,  $J = 9.7$  Hz, 1H, H-4'''), 5.19 (d,  $J = 3.4$  Hz, 1H, H-1'), 5.16–5.11 (m, 3H,  $\text{NCO}_2\text{CH}_2$ , H-1'''), 5.06 (t,  $J = 3.7$  Hz, 1H, H-2''), 4.97 (s, 1H, H-1), 4.89–4.75 (m, 6H,  $\text{CH}_2\text{Ph}$ , H-5, H-5''), 4.69–4.61 (m, 2H,  $\text{CH}_2\text{Ph}$ ), 4.56 (d,  $J = 11.2$  Hz, 1H,  $\text{CH}_2\text{Ph}$ ), 4.51 (s, 2H,  $\text{NCH}_2\text{Ph}$ ), 4.46 (d,  $J = 11.0$  Hz, 1H,  $\text{CH}_2\text{Ph}$ ), 4.40–4.35 (m, 1H), 4.29 (d,  $J = 3.7$  Hz, 1H), 4.24–4.12 (m, 4H), 4.02–3.85 (m, 6H), 3.83–3.65 (m, 7H), 3.62–3.57 (m, 4H), 3.50–3.40 (m, 1H,  $\text{OCH}_2\text{CH}_2$ ), 3.26–3.17 (m, 2H,  $\text{NCH}_2$ ), 2.98–2.79 (m, 4H,  $\text{PhCH}_2\text{CH}_2$ ,  $\text{CH}_2$ ), 2.65–2.47 (m, 4H,  $\text{CH}_2$ ,  $\text{PhCH}_2\text{CH}_2$ ), 2.15 (s, 3H,  $\text{CH}_3\text{C}=\text{O}$ ), 1.91 (s, 3H,  $\text{CH}_3\text{C}=\text{ON}$ ), 1.63–1.53 (m, 4H, 2 X  $\text{CH}_2$ ), 1.40–1.27 (m, 2H,  $\text{CH}_2$ );  $^{13}\text{C}$  NMR (100 MHz,  $\text{CD}_3\text{COCD}_3$ ):  $\delta$  206.5 ( $\text{CH}_3\text{C}=\text{OCH}_2$ ), 171.8, 169.8, 169.4, 169.1, 165.2, 157.0 (q,  $^2J_{\text{C},\text{F}} = 37.0$  Hz,  $\text{CF}_3\text{C}=\text{O}$ ), 139.0, 138.7, 138.6, 138.6, 138.5, 138.0, 134.3, 134.2, 133.3, 132.5, 132.4, 130.5, 129.9, 129.5, 128.7, 128.5, 128.4, 128.2, 128.1, 127.9, 127.8, 127.8, 127.7, 127.5, 127.5, 127.4, 127.2, 127.1, 126.9, 116.1 (q,  $^1J_{\text{C},\text{F}} = 287$  Hz,  $\text{CF}_3$ ), 101.2 (C-1), 97.7 (C-1''), 97.0 (C-1'''), 95.9 (C-1'), 78.0, 77.7, 74.6, 74.4, 74.4, 74.0, 73.6, 72.7, 72.4, 72.4, 71.9, 71.6, 71.1, 70.2, 69.7, 67.9, 67.4, 66.7, 66.3, 60.9, 60.1, 53.6, 52.5, 51.6, 51.3, 50.1, 49.8, 46.9, 46.1, 37.5 ( $\text{CH}_2\text{C}=\text{O}$ ), 32.2 (t,  $^2J_{\text{C},\text{F}} = 21.6$  Hz,  $\text{CH}_2\text{CF}_2$ ), 29.1, 28.9, 27.8, 25.7 (t,  $^3J_{\text{C},\text{F}} = 5.0$  Hz,  $\text{CH}_2\text{CH}_2\text{CF}_2$ ), 23.3, 22.3; HRMS (ESI-TOF)  $m/z$  [ $\text{M} + \text{H}$ ] $^+$  calcd for  $\text{C}_{98}\text{H}_{105}\text{F}_{16}\text{N}_3\text{O}_{28}$  2076.6707; Found 2076.6733.

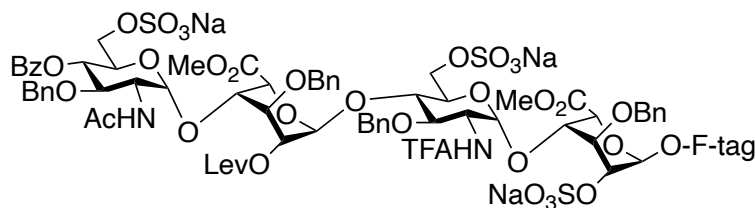

**S27**

***N*-(Benzyl)-3,3,4,4,5,5,6,6,7,7,8,8,8-tridecafluorooctyl-benzoyloxycarbonyl-5-aminopentyl (2-acetamido-3-*O*-benzyl-4-*O*-benzoyl-2-deoxy-6-*O*-*tert*-butyldiphenylsilyl- $\alpha$ -D-glucopyranosyl)-(1 $\rightarrow$ 4)-(methyl 3-*O*-benzyl-2-*O*-levulinoyl- $\alpha$ -L-idopyranosyluronate)-(1 $\rightarrow$ 4)-(3-*O*-benzyl-2-deoxy-6-*O*-sulfonato-2-trifluoroacetamido- $\alpha$ -D-glucopyranosyl)-(1 $\rightarrow$ 4)-(methyl 3-*O*-benzyl-2-*O*-sulfonato- $\alpha$ -L-idopyranosyluronate (S27).**

Compound **S26** (60 mg, 0.029 mmol) was treated according to the general procedure for *O*-sulfation to give tetrasaccharide **S27** (63 mg, 91%);  $R_f$  0.12 (6:1 DCM/MeOH);  $^1\text{H NMR}$  (400 MHz,  $\text{CD}_3\text{OD}$ ):  $\delta$  9.04 (d,  $J = 9.5$  Hz, 1H, NH), 8.28 (d,  $J = 9.2$  Hz, 1H, NH), 7.95–7.93 (m, 2H, Ar), 7.70–7.68 (m, 2H, Ar), 7.64–7.60 (m, 4H, Ar), 7.51–7.06 (m, 29H, Ar), 5.38 (d,  $J = 1.5$  Hz, 1H, H-1''), 5.24 (t,  $J = 9.3$  Hz, 1H, H-4'''), 5.15–5.07 (m, 6H,  $\text{NCO}_2\text{CH}_2$ , H-1, H-2', H-1''', H-1'), 4.94 (d,  $J = 2.4$  Hz, 1H), 4.85–4.70 (m, 4H), 4.64–4.57 (m, 3H), 4.53–4.44 (m, 4H), 4.38 (s, 1H), 4.33–4.21 (m, 5H), 4.13–4.00 (m, 6H), 3.86–3.67 (m, 7H), 3.52–3.44 (m, 4H,  $\text{OCH}_2\text{CH}_2$ ,  $\text{OCH}_3$ ), 3.22–3.13 (m, 2H,  $\text{NCH}_2$ ), 2.98–2.89 (m, 3H), 2.75 (dt,  $J = 18.9, 5.6$  Hz, 1H), 2.61 (dt,  $J = 17.0, 5.4$  Hz, 1H), 2.54–2.37 (m, 3H,  $\text{CH}_2$ ,  $\text{PhCH}_2\text{CH}_2$ ), 2.13 (s, 3H,  $\text{CH}_3\text{C}=\text{O}$ ), 2.01 (s, 3H,  $\text{CH}_3\text{C}=\text{ON}$ ), 1.63–1.53 (m, 4H, 2 X  $\text{CH}_2$ ), 1.40–1.27 (m, 2H,  $\text{CH}_2$ );  $^{13}\text{C NMR}$  (100 MHz,  $\text{CD}_3\text{OD}$ ):  $\delta$  208.5 ( $\text{CH}_3\text{C}=\text{OCH}_2$ ), 172.3, 170.5, 170.1, 165.4, 157.0 (q,  $^2J_{\text{C},\text{F}} = 37.0$  Hz,  $\text{CF}_3\text{C}=\text{O}$ ), 138.0, 137.9, 137.8, 137.5, 134.0, 134.0, 130.1, 129.5, 129.4, 128.3, 128.3, 128.2, 128.1, 128.1, 128.0, 127.8, 127.8, 127.7, 127.7, 127.6, 127.6, 127.5, 127.5, 127.3, 127.2, 126.9, 116.1 (q,  $^1J_{\text{C},\text{F}} = 287$  Hz,  $\text{CF}_3$ ), 99.9 (C-1), 97.5 (C-1''), 95.8, 94.9, 77.6, 77.4, 75.0, 74.1, 73.6, 72.2, 71.8, 71.7, 70.9, 70.8, 70.5, 70.3, 70.2, 69.4, 69.2, 68.3, 68.1, 66.8, 66.3, 66.2, 65.0, 53.8, 52.8, 51.9, 51.6, 50.1, 50.0, 46.1, 37.4 ( $\text{CH}_2\text{C}=\text{O}$ ), 32.2 (t,  $^2J_{\text{C},\text{F}} = 21.6$  Hz,  $\text{CH}_2\text{CF}_2$ ), 29.4, 28.8, 28.3,



27.7, 27.5, 25.7 (t,  $^3J_{C,F} = 5.0$  Hz,  $\text{CH}_2\text{CH}_2\text{CF}_2$ ), 23.2, 21.9; HRMS (ESI-TOF)  $m/z$  [ $\text{M} - 3\text{Na} + 2\text{H}$ ] $^-$  calcd for  $\text{C}_{114}\text{H}_{122}\text{F}_{16}\text{N}_3\text{O}_{34}\text{Si}$  2314.5256; Found 2314.5244.

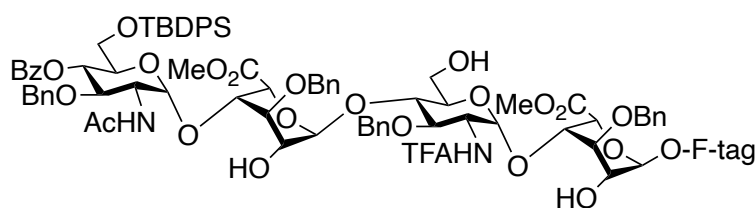

**S28**

***N*-(Benzyl)-3,3,4,4,5,5,6,6,7,7,8,8,8-tridecafluorooctyl-benzoyloxycarbonyl-5-aminopentyl (2-acetamido-3-*O*-benzyl-4-*O*-benzoyl-2-deoxy-6-*O*-tert-butylidiphenylsilyl- $\alpha$ -D-glucopyranosyl)-(1 $\rightarrow$ 4)-(methyl 3-*O*-benzyl- $\alpha$ -L-idopyranosyluronate)-(1 $\rightarrow$ 4)-(3-*O*-benzyl-2-deoxy-2-trifluoroacetamido- $\alpha$ -D-glucopyranosyl)-(1 $\rightarrow$ 4)-(methyl 3-*O*-benzyl- $\alpha$ -L-idopyranosyluronate (S28).**

Compound **S24** (80 mg, 0.034 mmol) was treated according to the general procedure for Nap deprotection to give tetrasaccharide **S28** (73 mg, 96%);  $R_f$  0.36 (3:2 hexanes/Acetone);  $^1\text{H}$  NMR (400 MHz,  $\text{CD}_3\text{COCD}_3$ ):  $\delta$  8.60 (d,  $J = 9.0$  Hz, 1H, NH), 8.03–8.01 (m, 2H, Ar), 7.77–7.75 (m, 2H, Ar), 7.69–7.62 (m, 3H, Ar), 7.56–7.09 (m, 37H, Ar), 5.63 (t,  $J = 9.6$  Hz, 1H, H-4'''), 5.37 (d,  $J = 2.2$  Hz, 1H, H-1''), 5.18–5.13 (m, 4H,  $\text{NCO}_2\text{CH}_2$ , H-1''', H-1'), 4.97 (s, 1H, H-1), 4.89–4.85 (m, 3H,  $\text{CH}_2\text{Ph}$ , H-5, H-5''), 4.79–4.61 (m, 5H,  $\text{CH}_2\text{Ph}$ ), 4.54 (d,  $J = 11.5$  Hz, 1H,  $\text{CH}_2\text{Ph}$ ), 4.50 (s, 2H,  $\text{NCH}_2\text{Ph}$ ), 4.40–4.35 (m, 2H), 4.25–4.13 (m, 3H), 4.08–4.04 (m, 2H), 3.99–3.89 (m, 5H), 3.92–3.83 (m, 4H), 3.87–3.64 (m, 10H), 3.50–3.40 (m, 1H,  $\text{OCH}_2\text{CH}_2$ ), 3.26–3.17 (m, 5H,  $\text{OCH}_3$ ,  $\text{NCH}_2$ ), 2.98–2.94 (m, 2H,  $\text{PhCH}_2\text{CH}_2$ ), 2.55–2.47 (m, 2H,  $\text{PhCH}_2\text{CH}_2$ ), 1.84 (s, 3H,  $\text{CH}_3\text{C}=\text{ON}$ ), 1.63–1.53 (m, 4H, 2 X  $\text{CH}_2$ ), 1.40–1.27 (m, 2H,  $\text{CH}_2$ ), 1.03 (s, 9H,  $(\text{CH}_3)_3\text{C}$ );  $^{13}\text{C}$  NMR (100 MHz,  $\text{CD}_3\text{COCD}_3$ ):  $\delta$  169.7, 169.4, 169.2, 164.7, 157.0 (q,  $^2J_{C,F} = 37.0$  Hz,  $\text{CF}_3\text{C}=\text{O}$ ), 138.7, 138.6, 138.5, 138.5, 138.3, 135.7, 135.5, 133.2, 133.2, 133.0, 130.2, 129.7, 129.6, 129.5, 128.7, 128.5, 128.4, 128.3, 128.2, 127.9, 127.7, 127.7, 127.6, 127.6, 127.5, 127.1, 126.9, 126.8, 116.1 (q,  $^1J_{C,F} = 287$  Hz,  $\text{CF}_3$ ), 101.3 (C-1), 100.5 (C-1''), 96.5 (C-1'''), 95.8 (C-1')

78.3, 74.0, 73.5, 73.0, 72.3, 72.1, 71.9, 71.5, 71.0, 70.3, 68.4, 66.3, 62.2, 55.1, 53.6, 52.4, 51.6, 51.0, 50.0, 49.8, 46.8, 32.1 (t,  $^2J_{C,F} = 21.6$  Hz,  $\text{CH}_2\text{CF}_2$ ), 29.1, 27.6, 26.2 ( $(\text{CH}_3)_3\text{C}$ ), 25.7 (t,  $^3J_{C,F} = 5.0$  Hz,  $\text{CH}_2\text{CH}_2\text{CF}_2$ ), 23.3, 22.2, 18.9 ( $(\text{CH}_3)_3\text{C}$ ); HRMS (ESI-TOF)  $m/z$  [ $\text{M} + \text{H}$ ] $^+$  calcd for  $\text{C}_{109}\text{H}_{1118}\text{F}_{16}\text{N}_3\text{O}_{26}\text{Si}$  2216.7517; Found 2216.7529.

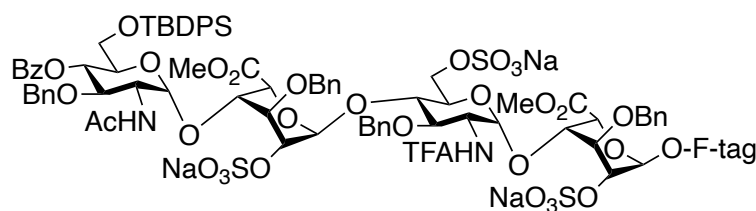

**S29**

***N*-(Benzyl)-3,3,4,4,5,5,6,6,7,7,8,8,8-tridecafluorooctyl-benzoyloxycarbonyl-5-aminopentyl (2-acetamido-3-*O*-benzyl-4-*O*-benzoyl-2-deoxy-6-*O*-tert-butylidiphenylsilyl- $\alpha$ -D-glucopyranosyl)-(1 $\rightarrow$ 4)-(methyl 3-*O*-benzyl-2-*O*-sulfonato- $\alpha$ -L-idopyranosyluronate)-(1 $\rightarrow$ 4)-(3-*O*-benzyl-2-deoxy-6-*O*-sulfonato-2-trifluoroacetamido- $\alpha$ -D-glucopyranosyl)-(1 $\rightarrow$ 4)-(methyl 3-*O*-benzyl-2-*O*-sulfonato- $\alpha$ -L-idopyranosyluronate (S29).**

Compound **S28** (66 mg, 0.031 mmol) was treated according to the general procedure for *O*-sulfation to give tetrasaccharide **S29** (68 mg, 90%);  $R_f$  0.53 (4:1 DCM/MeOH);  $^1\text{H}$  NMR (400 MHz,  $\text{CD}_3\text{COCD}_3$ ):  $\delta$  9.13 (d,  $J = 8.2$  Hz, 1H, NH), 8.04–7.98 (m, 2H, Ar), 7.73–7.65 (m, 3H, Ar), 7.60–7.52 (m, 4H, Ar), 7.46–7.09 (m, 34H, Ar), 5.58–5.54 (m, 2H, H-4''', H-1'''), 5.16–4.94 (m, 8H,  $\text{NCO}_2\text{CH}_2$ , H-1''', H-1', H-1,  $\text{CH}_2\text{Ph}$ ), 4.89–4.84 (m, 2H,  $\text{CH}_2\text{Ph}$ ), 4.80–4.75 (m, 3H), 4.69–4.54 (m, 7H), 4.48 (s, 2H,  $\text{NCH}_2\text{Ph}$ ), 4.39–4.37 (m, 3H), 4.26–3.98 (m, 9H), 3.84–3.68 (m, 6H), 3.50–3.40 (m, 1H,  $\text{OCH}_2\text{CH}_2$ ), 3.35–3.25 (m, 5H,  $\text{OCH}_3$ ,  $\text{NCH}_2$ ), 2.98–2.94 (m, 2H,  $\text{PhCH}_2\text{CH}_2$ ), 2.60–2.47 (m, 2H,  $\text{PhCH}_2\text{CH}_2$ ), 2.11 (s, 3H,  $\text{CH}_3\text{C}=\text{ON}$ ), 1.63–1.53 (m, 4H, 2 X  $\text{CH}_2$ ), 1.40–1.27 (m, 2H,  $\text{CH}_2$ ), 1.00 (s, 9H,  $(\text{CH}_3)_3\text{C}$ );  $^{13}\text{C}$  NMR (100 MHz,  $\text{CD}_3\text{COCD}_3$ ):  $\delta$  135.7, 135.6, 133.3, 129.7, 129.6, 128.8, 128.3, 128.2, 127.8, 127.6, 100.2, 100.0, 98.2, 97.4, 77.4, 77.2, 74.8, 74.4, 73.6, 72.8, 72.5, 72.4, 77.2, 71.9, 71.5, 71.4, 71.1, 70.9, 70.7, 69.7, 68.8, 67.9, 66.6, 66.3, 65.1, 62.3, 54.7,

53.6, 52.1, 51.5, 49.9, 46.8, 32.2, 29.1, 27.6, 26.4, 25.8, 23.3, 22.2; HRMS (ESI-TOF)  $m/z$   $[M - Na]^-$  calcd for  $C_{109}H_{114}F_{16}N_3O_{35}Si_3Na_2$  2498.5703; Found 2498.5728.

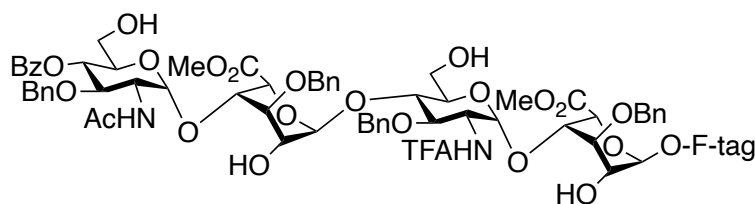

**S30**

***N*-(Benzyl)-3,3,4,4,5,5,6,6,7,7,8,8,8-tridecafluorooctyl-benzoyloxycarbonyl-5-aminopentyl (2-acetamido-3-*O*-benzyl-4-*O*-benzoyl-2-deoxy- $\alpha$ -D-glucopyranosyl)-(1 $\rightarrow$ 4)-(methyl 3-*O*-benzyl- $\alpha$ -L-idopyranosyluronate)-(1 $\rightarrow$ 4)-(3-*O*-benzyl-2-deoxy-2-trifluoroacetamido- $\alpha$ -D-glucopyranosyl)-(1 $\rightarrow$ 4)-(methyl 3-*O*-benzyl- $\alpha$ -L-idopyranosyluronate (S30).**

Compound **S28** (75 mg, 0.034 mmol) was treated according to the general procedure for TBDPS deprotection to give tetrasaccharide **S30** (62 mg, 93%);  $R_f$  0.17 (3:2 hexanes/Acetone);  $^1H$  NMR (400 MHz,  $CD_3COCD_3$ ):  $\delta$  8.60 (d,  $J$  = 9.1 Hz, 1H, NH), 8.03–8.01 (m, 2H, Ar), 7.75–7.73 (m, 3H, Ar), 7.67–7.63 (m, 1H, Ar), 7.54–7.13 (m, 28H, Ar), 5.37 (d,  $J$  = 2.3 Hz, 1H, H-1''), 5.32 (t,  $J$  = 9.7 Hz, 1H, H-4'''), 5.19 (d,  $J$  = 3.5 Hz, H-1'), 5.17–5.14 (m, 2H,  $NCO_2CH_2$ ), 5.09 (d,  $J$  = 3.5 Hz, H-1'''), 4.98 (s, 1H, H-1), 4.97–4.86 (m, 4H, OH,  $CH_2Ph$ , H-5, H-5''), 4.79–4.62 (m, 5H,  $CH_2Ph$ ), 4.55 (d,  $J$  = 11.1 Hz, 1H,  $CH_2Ph$ ), 4.50 (s, 2H,  $NCH_2Ph$ ), 4.39 (d,  $J$  = 11.3 Hz, 1H,  $CH_2Ph$ ), 4.35–4.29 (m, 1H, H-2'''), 4.27–4.21 (m, 1H, H-2'), 4.19 (t,  $J$  = 2.5 Hz, H-4), 4.15 (t,  $J$  = 3.1 Hz, H-4''), 4.08 (t,  $J$  = 9.5 Hz, 1H), 4.03–3.85 (m, 7H), 3.81–3.55 (m, 9H), 3.50–3.40 (m, 4H,  $OCH_3$ ,  $OCH_2CH_2$ ), 3.26–3.17 (m, 2H,  $NCH_2$ ), 2.98–2.94 (m, 2H,  $PhCH_2CH_2$ ), 2.60–2.47 (m, 2H,  $PhCH_2CH_2$ ), 1.83 (s, 3H,  $CH_3C=ON$ ), 1.63–1.53 (m, 4H, 2 X  $CH_2$ ), 1.40–1.27 (m, 2H,  $CH_2$ );  $^{13}C$  NMR (100 MHz,  $CD_3COCD_3$ ):  $\delta$  169.8, 169.5, 169.3, 165.2, 157.0 (q,  $^2J_{C,F}$  = 37.0 Hz,  $CF_3C=O$ ), 139.0, 138.7, 138.6, 138.5, 138.5, 138.3, 134.3, 134.2, 133.3, 130.5, 130.0, 129.5, 128.7, 128.5, 128.4, 128.3, 128.2, 128.1, 127.9, 127.8, 127.7, 127.5, 127.5, 127.1, 127.1, 126.9,

116.1 (q,  $^1J_{C,F} = 287$  Hz, CF<sub>3</sub>), 101.3 (C-1), 100.5 (C-1''), 96.6 (C-1'''), 95.8 (C-1'), 78.4, 78.0, 76.4, 74.4, 74.1, 73.5, 73.0, 72.3, 72.2, 71.5, 71.2, 71.0, 68.4, 67.9, 67.2, 66.3, 60.9, 60.3, 55.1, 54.6, 53.6, 52.4, 51.6, 51.2, 50.0, 49.8, 46.9, 46.1, 32.2 (t,  $^2J_{C,F} = 21.6$  Hz, CH<sub>2</sub>CF<sub>2</sub>), 29.7, 27.9, 25.7 (t,  $^3J_{C,F} = 5.0$  Hz, CH<sub>2</sub>CH<sub>2</sub>CF<sub>2</sub>), 23.3, 22.2; HRMS (ESI-TOF) m/z [M + H]<sup>+</sup> calcd for C<sub>93</sub>H<sub>100</sub>F<sub>16</sub>N<sub>3</sub>O<sub>26</sub> 1978.6340; Found 1978.6348.

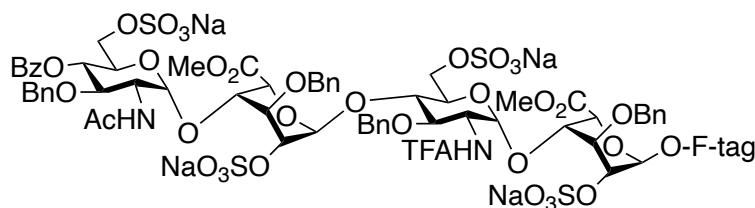

**S31**

***N*-(Benzyl)-3,3,4,4,5,5,6,6,7,7,8,8,8-tridecafluorooctyl-benzoyloxycarbonyl-5-aminopentyl (2-acetamido-3-*O*-benzyl-4-*O*-benzoyl-2-deoxy-6-*O*-sulfonato- $\alpha$ -D-glucopyranosyl)-(1 $\rightarrow$ 4)-(methyl 3-*O*-benzyl-2-*O*-sulfonato- $\alpha$ -L-idopyranosyluronic acid)-(1 $\rightarrow$ 4)-(3-*O*-benzyl-2-deoxy-6-*O*-sulfonato-2-trifluoroacetamido- $\alpha$ -D-glucopyranosyl)-(1 $\rightarrow$ 4)-(methyl 3-*O*-benzyl-2-*O*-sulfonato- $\alpha$ -L-idopyranosyluronic acid) (S31).**

Compound **S30** (62 mg, 0.031 mmol) was treated according to the general procedure for *O*-sulfation to give tetrasaccharide **S31** (66 mg, 89%); *R<sub>f</sub>* 0.15 (4:1 DCM/MeOH); <sup>1</sup>H NMR (400 MHz, CD<sub>3</sub>COCD<sub>3</sub>):  $\delta$  9.18 (d, *J* = 8.2 Hz, 1H, NH), 8.08–8.06 (m, 2H, Ar), 7.57–7.71 (m, 3H, Ar), 7.61–7.03 (m, 29H, Ar), 5.63 (s, 1H, H-1''), 5.22–4.71 (m, 10H, NCO<sub>2</sub>CH<sub>2</sub>, H-4''', H-1, H-1', H-1''', H-5'', CH<sub>2</sub>Ph), 4.63–4.36 (m, 6H), 4.21–3.90 (m, 8H), 3.82 (s, 3H, OCH<sub>3</sub>), 3.76–3.70 (m, 1H, OCH<sub>2</sub>CH<sub>2</sub>), 3.59 (s, 3H, OCH<sub>3</sub>), 3.50–3.40 (m, 1H, OCH<sub>2</sub>CH<sub>2</sub>), 3.26–3.17 (m, 2H, NCH<sub>2</sub>), 2.98–2.94 (m, 2H, PhCH<sub>2</sub>CH<sub>2</sub>), 2.60–2.47 (m, 2H, PhCH<sub>2</sub>CH<sub>2</sub>), 1.95 (s, 3H, CH<sub>3</sub>C=ON), 1.63–1.53 (m, 4H, 2 X CH<sub>2</sub>), 1.40–1.27 (m, 2H, CH<sub>2</sub>); <sup>13</sup>C NMR (100 MHz, CD<sub>3</sub>COCD<sub>3</sub>):  $\delta$  134.3, 133.4, 130.5, 129.8, 128.4, 128.3, 128.2, 128.2, 127.8, 127.5, 100.0, 99.9, 99.5, 97.9, 77.0, 75.1, 74.8, 74.4, 73.5, 72.4, 72.2, 72.0, 71.9, 71.4, 70.8, 70.7, 69.8, 69.3, 68.1, 67.9, 66.6, 66.4, 65.8, 65.5, 54.8, 54.5, 52.3, 52.2, 50.1, 46.6,

32.1, 29.3, 27.7, 25.8, 23.3, 22.2; HRMS (ESI-TOF)  $m/z$   $[M + H]^+$  calcd for  $C_{93}H_{95}F_{16}N_3O_{38}Si_4Na_3$  2362.3914; Found 2362.3936.

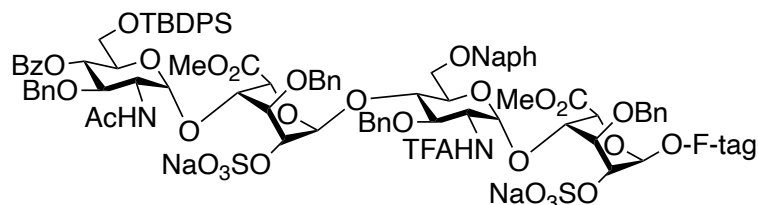

**S33**

***N*-(Benzyl)-3,3,4,4,5,5,6,6,7,7,8,8,8-tridecafluorooctyl-benzoyloxycarbonyl-5-aminopentyl (2-acetamido-3-*O*-benzyl-4-*O*-benzoyl-2-deoxy-6-*O*-tert-butylidiphenylsilyl- $\alpha$ -D-glucopyranosyl)-(1 $\rightarrow$ 4)-(methyl 3-*O*-benzyl-2-*O*-sulfonato- $\alpha$ -L-idopyranosyluronate)-(1 $\rightarrow$ 4)-(3-*O*-benzyl-2-deoxy-6-*O*-2-naphthylmethyl-2-trifluoroacetamido- $\alpha$ -D-glucopyranosyl)-(1 $\rightarrow$ 4)-(methyl 3-*O*-benzyl-2-*O*-sulfonato- $\alpha$ -L-idopyranosyluronate (S33).**

Compound **77** (81 mg, 0.034 mmol) was treated according to the general procedure for Lev deprotection and O-sulfation to give tetrasaccharide **S33** (76 mg, 88%);  $R_f$  0.54 (6:1 DCM/MeOH);  $^1H$  NMR (400 MHz,  $CD_3COCD_3$ ):  $\delta$  9.03 (d,  $J = 7.5$  Hz, 1H, NH), 8.03–7.93 (m, 4H, Ar), 7.84–7.72 (m, 4H, Ar), 7.66–7.56 (m, 40H, Ar, NH), 5.64–5.59 (m, 2H, H-4''', H-1'''), 5.15–5.12 (m, 2H,  $NCO_2CH_2$ ), 5.01–4.92 (m, 8H, H-1''', H-1', H-1, H-5'',  $CH_2Ph$ ,  $CH_2Nap$ ), 4.80–4.67 (m, 6H, H-5,  $CH_2Ph$ ), 4.61–4.55 (m, 2H), 4.51–4.48 (m, 4H), 4.30–4.24 (m, 2H), 4.19–4.10 (m, 5H), 4.02–3.95 (m, 4H), 3.83–3.68 (m, 4H), 3.51 (s, 3H,  $OCH_3$ ), 3.47–3.38 (m, 1H,  $OCH_2CH_2$ ), 3.23–3.15 (m, 2H,  $OCH_3$ ,  $NCH_2$ ), 3.06 (s, 3H,  $OCH_3$ ), 2.98–2.94 (m, 2H,  $PhCH_2CH_2$ ), 2.60–2.47 (m, 2H,  $PhCH_2CH_2$ ), 1.95 (s, 3H,  $CH_3C=ON$ ), 1.63–1.53 (m, 4H, 2 X  $CH_2$ ), 1.40–1.27 (m, 2H,  $CH_2$ ), 1.00 (s, 9H,  $(CH_3)_3C$ );  $^{13}C$  NMR (100 MHz,  $CD_3COCD_3$ ):  $\delta$  170.8, 169.3, 164.7, 157.0 (q,  $^2J_{C,F} = 37.0$  Hz,  $CF_3C=O$ ), 139.3, 139.0, 138.7, 138.6, 138.0, 136.7, 135.7, 135.5, 133.5, 133.1, 133.0, 133.0, 130.3, 129.7, 129.6, 129.5, 128.6, 128.5, 128.4, 128.3, 128.2, 128.1, 128.0, 127.8, 127.7, 127.7, 127.7, 127.6, 127.5, 127.5, 127.4, 127.3, 127.3, 127.1, 126.9, 126.6, 126.5,

126.4, 125.8, 125.5, 116.1 (q,  $^1J_{C,F} = 287$  Hz, CF<sub>3</sub>), 100.0 (C-1), 99.7 (C-1'), 98.7 (C-1''), 98.4 (C-1'''), 77.9, 77.2, 74.7, 74.5, 74.2, 73.9, 72.6, 72.5, 72.2, 71.8, 71.3, 71.0, 70.6, 69.8, 68.7, 67.6, 67.2, 66.5, 66.3, 62.2, 54.6, 54.6, 53.4, 51.3, 50.7, 46.5, 32.1 (t,  $^2J_{C,F} = 21.6$  Hz, CH<sub>2</sub>CF<sub>2</sub>), 29.1, 27.7, 26.3 ((CH<sub>3</sub>)<sub>3</sub>C), 25.7 (t,  $^3J_{C,F} = 5.0$  Hz, CH<sub>2</sub>CH<sub>2</sub>CF<sub>2</sub>), 23.3, 22.5, 18.8; HRMS (ESI-TOF) m/z [M – 2Na]<sup>2-</sup> calcd for C<sub>120</sub>H<sub>125</sub>F<sub>16</sub>N<sub>3</sub>O<sub>32</sub>Si<sub>2</sub> 1256.8523; Found 1256.8502.

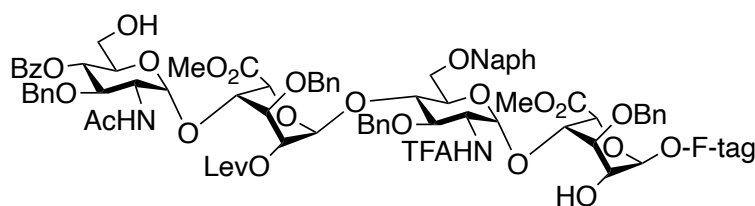

**S34**

***N*-(Benzyl)-3,3,4,4,5,5,6,6,7,7,8,8,8-tridecafluorooctyl-benzoyloxycarbonyl-5-aminopentyl (2-acetamido-3-*O*-benzyl-4-*O*-benzoyl-2-deoxy- $\alpha$ -D-glucopyranosyl)-(1 $\rightarrow$ 4)-(methyl 3-*O*-benzyl-2-*O*-levulinoyl- $\alpha$ -L-idopyranosyluronate)-(1 $\rightarrow$ 4)-(3-*O*-benzyl-2-deoxy-6-*O*-2-naphthylmethyl-2-trifluoroacetamido- $\alpha$ -D-glucopyranosyl)-(1 $\rightarrow$ 4)-(methyl 3-*O*-benzyl- $\alpha$ -L-idopyranosyluronate (S34).**

Compound **77** (71 mg, 0.27 mmol) was treated according to the general procedure for TBDPS deprotection to give tetrasaccharide **S34** (67 mg, 96%); *R*<sub>f</sub> 0.28 (1:4 hexanes/EtOAc); <sup>1</sup>H NMR (400 MHz, CD<sub>3</sub>COCD<sub>3</sub>):  $\delta$  8.60 (d, *J* = 8.9 Hz, 1H, NH), 8.19–8.15 (m, 2H, Ar), 8.07–7.84 (m, 7H, Ar), 7.77–7.21 (m, 31H, Ar), 5.43 (d, *J* = 3.3 Hz, 1H, H-1''), 5.34 (t, *J* = 9.9 Hz, 1H, H-4'''), 5.22 (d, *J* = 3.3 Hz, 1H, H-1'), 5.16–5.13 (m, 2H, NCO<sub>2</sub>CH<sub>2</sub>), 5.12 (d, *J* = 3.5 Hz, 1H, H-1'''), 5.05 (t, *J* = 3.9 Hz, 1H, H-2''), 5.03 (s, 1H, H-1), 4.89 (d, *J* = 3.3 Hz, 1H), 4.86 (d, *J* = 2.0 Hz, 1H), 4.82–4.72 (m, 6H), 4.68–4.63 (m, 2H), 4.55 (d, *J* = 11.0 Hz, 1H), 4.50 (s, 2H, NCH<sub>2</sub>Ph), 4.42–4.33 (m, 2H), 4.28–4.23 (m, 2H), 4.19–4.10 (m, 3H), 4.08–3.93 (m, 5H), 3.82–3.70 (m, 8H), 3.60 (dd, *J* = 12.3, 5.0 Hz, 1H), 3.52 (s, 3H, OCH<sub>3</sub>), 3.50–3.40 (m, 1H, OCH<sub>2</sub>CH<sub>2</sub>), 3.26–3.19 (m, 2H, NCH<sub>2</sub>), 2.98–2.94 (m, 2H, PhCH<sub>2</sub>CH<sub>2</sub>), 2.80–2.46 (m, 6H, CH<sub>2</sub>, PhCH<sub>2</sub>CH<sub>2</sub>), 2.10 (s, 3H, CH<sub>3</sub>C=O),

1.81 (s, 3H, CH<sub>3</sub>C=ON), 1.63–1.53 (m, 4H, 2 X CH<sub>2</sub>), 1.40–1.27 (m, 2H, CH<sub>2</sub>); <sup>13</sup>C NMR (100 MHz, CD<sub>3</sub>COCD<sub>3</sub>): δ 206.6 (CH<sub>3</sub>C=OCH<sub>2</sub>), 172.2, 170.3, 169.7, 169.4, 167.2, 165.5, 157.0 (q, <sup>2</sup>J<sub>C,F</sub> = 37.0 Hz, CF<sub>3</sub>C=O), 146.0, 140.7, 139.3, 139.0, 138.9, 138.8, 138.4, 136.6, 134.6, 134.6, 133.8, 133.7, 133.4, 133.2, 132.9, 132.7, 130.8, 130.3, 129.9, 129.8, 129.0, 128.8, 128.8, 128.5, 128.5, 128.4, 128.4, 128.3, 128.3, 128.2, 128.0, 127.8, 127.8, 127.7, 127.6, 127.5, 127.3, 126.5, 126.4, 126.3, 126.1, 116.1 (q, <sup>1</sup>J<sub>C,F</sub> = 287 Hz, CF<sub>3</sub>), 101.5 (C-1), 98.2 (C-1''), 98.1 (C-1'''), 96.3 (C-1'), 78.7, 78.1, 75.1, 75.0, 74.5, 74.2, 73.7, 73.4, 73.2, 73.0, 72.9, 72.2, 72.1, 72.0, 71.5, 69.7, 69.2, 68.5, 68.3, 67.7, 66.9, 66.7, 61.4, 54.0, 52.9, 51.9, 51.7, 50.4, 50.2, 47.3, 46.5, 37.7 (CH<sub>2</sub>C=O), 32.5 (t, <sup>2</sup>J<sub>C,F</sub> = 21.6 Hz, CH<sub>2</sub>CF<sub>2</sub>), 29.2, 29.1, 28.1, 27.8, 25.7 (t, <sup>3</sup>J<sub>C,F</sub> = 5.0 Hz, CH<sub>2</sub>CH<sub>2</sub>CF<sub>2</sub>), 23.7, 22.6; HRMS (ESI-TOF) m/z [M + H]<sup>+</sup> calcd for C<sub>109</sub>H<sub>113</sub>F<sub>16</sub>N<sub>3</sub>O<sub>28</sub> 2216.7334; Found 2216.7334.

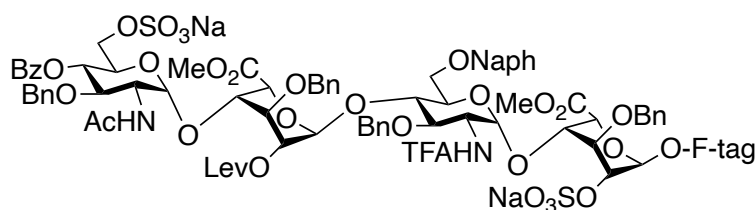

**S35**

***N*-(Benzyl)-3,3,4,4,5,5,6,6,7,7,8,8,8-tridecafluorooctyl-benzylloxycarbonyl-5-aminopentyl (2-acetamido-3-*O*-benzyl-4-*O*-benzoyl-2-deoxy-2-*O*-sulfonato- $\alpha$ -D-glucopyranosyl)-(1 $\rightarrow$ 4)-(methyl 3-*O*-benzyl-2-*O*-levulinoyl- $\alpha$ -L-idopyranosylurionate)-(1 $\rightarrow$ 4)-(3-*O*-benzyl-2-deoxy-6-*O*-2-naphthylmethyl-2-trifluoroacetamido- $\alpha$ -D-glucopyranosyl)-(1 $\rightarrow$ 4)-(methyl 3-*O*-benzyl-2-*O*-sulfonato- $\alpha$ -L-idopyranosylurionate (S35).**

Compound **S34** (70 mg, 0.031 mmol) was treated according to the general procedure for *O*-sulfation to give tetrasaccharide **S35** (71 mg, 93%); *R*<sub>f</sub> 0.36 (6:1 DCM/MeOH); <sup>1</sup>H NMR (400 MHz, CD<sub>3</sub>OD): δ 9.10 (d, *J* = 9.0 Hz, 1H, NH), 8.21 (d, *J* = 9.0 Hz, 1H, NH), 7.87–7.79 (m, 5H, Ar), 7.70–7.68 (m, 2H, Ar), 7.62–7.52 (m, 3H, Ar), 7.48–7.00 (m, 31H, Ar), 5.23–5.08 (m, 7H, H-1'', H-4''', H-1', NCO<sub>2</sub>CH<sub>2</sub>, H-1''', H-1), 5.02 (d, *J* = 1.6 Hz, 1H), 4.93

(s, 1H), 4.86 (s, 1H), 4.82–4.68 (m, 5H), 4.64–4.58 (m, 2H), 4.52–4.48 (m, 3H), 4.44–4.31 (m, 6H), 4.19 (s, 1H), 4.13–4.04 (m, 5H), 3.97–3.88 (m, 2H), 3.77–3.64 (m, 8H), 3.50–3.40 (m, 1H, OCH<sub>2</sub>CH<sub>2</sub>), 3.38 (s, 3H, OCH<sub>3</sub>), 3.21–3.10 (m, 2H, NCH<sub>2</sub>), 2.91–2.88 (m, 2H, PhCH<sub>2</sub>CH<sub>2</sub>), 2.72–2.67 (m, 2H), 2.48–2.32 (m, 4H, CH<sub>2</sub>, PhCH<sub>2</sub>CH<sub>2</sub>), 2.11 (s, 3H, CH<sub>3</sub>C=O), 1.88 (s, 3H, CH<sub>3</sub>C=ON), 1.63–1.53 (m, 4H, 2 X CH<sub>2</sub>), 1.40–1.27 (m, 2H, CH<sub>2</sub>); <sup>13</sup>C NMR (100 MHz, CD<sub>3</sub>COCD<sub>3</sub>): δ 207.5 (CH<sub>3</sub>C=OCH<sub>2</sub>), 172.2, 170.3, 169.8, 165.3, 157.0 (q, <sup>2</sup>J<sub>C,F</sub> = 37.0 Hz, CF<sub>3</sub>C=O), 137.8, 137.7, 137.6, 137.5, 135.7, 134.0, 134.0, 133.4, 133.2, 133.1, 130.1, 129.4, 129.3, 128.3, 128.3, 128.2, 128.1, 128.1, 127.9, 127.8, 127.8, 127.7, 127.6, 127.6, 127.5, 127.4, 127.3, 127.3, 127.1, 126.9, 126.1, 125.8, 125.6, 116.1 (q, <sup>1</sup>J<sub>C,F</sub> = 287 Hz, CF<sub>3</sub>), 99.9, 97.5, 94.8, 93.8, 77.8, 75.0, 74.1, 74.0, 72.9, 72.4, 71.6, 71.6, 70.7, 70.6, 70.1, 69.8, 69.5, 69.2, 67.8, 67.6, 67.0, 66.8, 66.2, 53.9, 52.5, 51.6, 51.3, 50.1, 37.0 (CH<sub>2</sub>C=O), 32.2 (t, <sup>2</sup>J<sub>C,F</sub> = 21.6 Hz, CH<sub>2</sub>CF<sub>2</sub>), 28.8, 28.3, 27.4, 27.3, 25.7 (t, <sup>3</sup>J<sub>C,F</sub> = 5.0 Hz, CH<sub>2</sub>CH<sub>2</sub>CF<sub>2</sub>), 23.2, 21.8; HRMS (ESI-TOF) m/z [M – 2Na + H]<sup>-</sup> calcd for C<sub>109</sub>H<sub>112</sub>F<sub>16</sub>N<sub>3</sub>O<sub>34</sub>S<sub>2</sub> 2374.6313; Found 2374.6289.

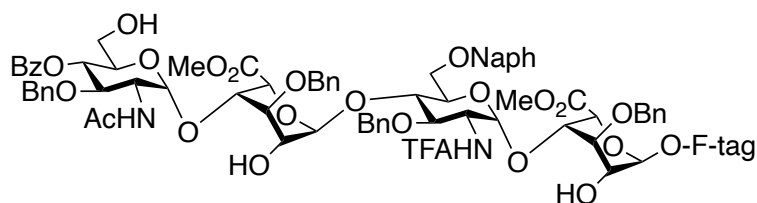

**S36**

***N*-(Benzyl)-3,3,4,4,5,5,6,6,7,7,8,8,8-tridecafluorooctyl-benzoyloxycarbonyl-5-aminopentyl (2-acetamido-3-*O*-benzyl-4-*O*-benzoyl-2-deoxy- $\alpha$ -D-glucopyranosyl)-(1→4)-(methyl 3-*O*-benzyl- $\alpha$ -L-idopyranosyluronate)-(1→4)-(3-*O*-benzyl-2-deoxy-6-*O*-2-naphthylmethyl-2-trifluoroacetamido- $\alpha$ -D-glucopyranosyl)-(1→4)-(methyl 3-*O*-benzyl- $\alpha$ -L-idopyranosyluronate (S36).**

Compound **S34** (63 mg, 0.028 mmol) was treated according to the general procedure for Lev deprotection to give tetrasaccharide **S36** (58 mg, 96%); *R*<sub>f</sub> 0.22 (1:2 hexanes/EtOAc); <sup>1</sup>H NMR (400 MHz, CD<sub>3</sub>COCD<sub>3</sub>): δ 8.02–7.95 (m, 3H, Ar), 7.92–7.73 (m, 6H, Ar), 7.67–



7.05 (m, 33H, Ar), 5.42 (d,  $J = 2.3$  Hz, 1H, H-1''), 5.32 (t,  $J = 9.6$  Hz, 1H, H-4'''), 5.23 (d,  $J = 3.4$  Hz, 1H, H-1'), 5.15–5.13 (m, 2H, NCO<sub>2</sub>CH<sub>2</sub>), 5.11 (d,  $J = 3.8$  Hz, 1H, H-1'''), 4.98 (s, 1H, H-1), 4.93 (d,  $J = 3.3$  Hz, 1H), 4.88–4.85 (m, 4H), 4.79–4.73 (m, 3H), 4.64 (d,  $J = 11.5$  Hz, 1H), 4.60 (d,  $J = 11.2$  Hz, 1H), 4.51 (d,  $J = 11.2$  Hz, 1H), 4.50 (s, 2H, NCH<sub>2</sub>Ph), 4.39 (d,  $J = 11.2$  Hz, 1H), 4.35–4.26 (m, 2H), 4.21 (t,  $J = 2.5$  Hz, 1H), , 4.16–4.09 (m, 3H), 4.04–3.88 (m, 5H), 3.83–3.71 (m, 5H), 3.70 (s, 3H, OCH<sub>3</sub>), 3.66–3.57 (m, 2H), 3.50–3.40 (m, 4H, OCH<sub>3</sub>, OCH<sub>2</sub>CH<sub>2</sub>), 3.26–3.19 (m, 2H, NCH<sub>2</sub>), 2.98–2.94 (m, 2H, PhCH<sub>2</sub>CH<sub>2</sub>), 2.60–2.47 (m, 2H, PhCH<sub>2</sub>CH<sub>2</sub>), 1.76 (s, 3H, CH<sub>3</sub>C=ON), 1.63–1.53 (m, 4H, 2 X CH<sub>2</sub>), 1.40–1.27 (m, 2H, CH<sub>2</sub>); <sup>13</sup>C NMR (100 MHz, CD<sub>3</sub>COCD<sub>3</sub>): δ 169.8, 169.3, 169.2, 165.1, 157.0 (q, <sup>2</sup> $J_{C,F} = 37.0$  Hz, CF<sub>3</sub>C=O), 149.4, 138.9, 138.6, 138.6, 138.5, 138.5, 138.3, 136.3, 136.3, 134.2, 134.2, 133.5, 133.3, 133.0, 132.3, 130.5, 130.0, 129.5, 128.6, 128.5, 128.4, 128.3, 128.2, 128.1, 128.1, 128.0, 127.9, 127.9, 127.8, 127.7, 127.6, 127.5, 127.5, 127.4, 127.2, 127.1, 126.9, 126.2, 126.0, 125.9, 125.7, 116.1 (q, <sup>1</sup> $J_{C,F} = 287$  Hz, CF<sub>3</sub>), 101.3 (C-1), 100.6 (C-1''), 96.9 (C-1'''), 95.7 (C-1'), 78.5, 78.0, 74.7, 74.6, 74.5, 73.5, 73.3, 73.2, 72.5, 72.4, 72.3, 72.1, 71.5, 71.3, 70.9, 68.5, 68.4, 68.0, 67.9, 67.1, 66.3, 60.9, 53.6, 52.3, 52.2, 51.6, 51.2, 46.9, 46.1, 32.1 (t, <sup>2</sup> $J_{C,F} = 21.6$  Hz, CH<sub>2</sub>CF<sub>2</sub>), 29.1, 27.5, 25.7 (t, <sup>3</sup> $J_{C,F} = 5.0$  Hz, CH<sub>2</sub>CH<sub>2</sub>CF<sub>2</sub>), 23.3, 22.1; HRMS (ESI-TOF)  $m/z$  [M + H]<sup>+</sup> calcd for C<sub>104</sub>H<sub>108</sub>F<sub>16</sub>N<sub>3</sub>O<sub>26</sub> 2118.6966; Found 2118.6951.

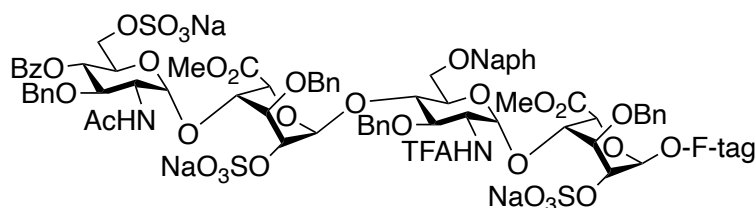

**S37**

***N*-(Benzyl)-3,3,4,4,5,5,6,6,7,7,8,8,8-tridecafluorooctyl-benzoyloxycarbonyl-5-aminopentyl (2-acetamido-3-*O*-benzyl-4-*O*-benzoyl-2-deoxy-6-*O*-sulfonato- $\alpha$ -D-glucopyranosyl)-(1→4)-(methyl 3-*O*-benzyl-2-*O*-sulfonato- $\alpha$ -L-idopyranosyluronate)-(1→4)-(3-*O*-benzyl-2-deoxy-6-*O*-2-naphthylmethyl-2-**

**trifluoroacetamido- $\alpha$ -D-glucopyranosyl)-(1 $\rightarrow$ 4)-(methyl 3-O-benzyl-2-O-sulfonato- $\alpha$ -L-idopyranosyluronate (S37).**

Compound **S36** (60 mg, 0.028 mmol) was treated according to the general procedure for O-sulfation to give tetrasaccharide **S37** (63 mg, 91%);  $R_f$  0.30 (4:1 DCM/MeOH);  $^1\text{H}$  NMR (400 MHz,  $\text{CD}_3\text{OD}$ ):  $\delta$  9.09 (d,  $J$  = 9.6 Hz, NH), 7.97–7.76 (m, 5H, Ar), 7.71–7.54 (m, 7H, Ar), 7.49–7.02 (m, 29H, Ar), 5.57 (s, 1H, H-1"), 5.22 (t,  $J$  = 9.5 Hz, 1H, H-4""), 5.17 (d,  $J$  = 3.4 Hz), 5.13–5.08 (m, 3H, H-1,  $\text{NCO}_2\text{CH}_2$ ), 4.96–4.93 (m, 3H), 4.90–4.85 (m, 3H), 4.80–4.66 (m, 4H), 4.64–4.53 (m, 3H), 4.49–4.30 (m, 7H), 4.26–3.81 (m, 11H), 3.77–3.61 (m, 6H), 3.50–3.40 (m, 1H,  $\text{OCH}_2\text{CH}_2$ ), 3.31 (s, 3H,  $\text{OCH}_3$ ), 3.20–3.10 (m, 2H,  $\text{NCH}_2$ ), 2.93–2.89 (m, 2H,  $\text{PhCH}_2\text{CH}_2$ ), 2.48–2.39 (m, 2H,  $\text{PhCH}_2\text{CH}_2$ ), 2.02 (s, 3H,  $\text{CH}_3\text{C}=\text{O}$ ), 1.63–1.53 (m, 4H, 2 X  $\text{CH}_2$ ), 1.40–1.27 (m, 2H,  $\text{CH}_2$ );  $^{13}\text{C}$  NMR (100 MHz,  $\text{CD}_3\text{COCD}_3$ ):  $\delta$  172.7, 170.3, 170.1, 165.4, 157.2 (q,  $^2J_{\text{C},\text{F}}$  = 37.0 Hz,  $\text{CF}_3\text{C}=\text{O}$ ), 138.0, 137.9, 137.8, 137.5, 135.9, 134.0, 134.0, 133.5, 133.1, 133.0, 132.5, 132.3, 130.1, 129.6, 129.4, 128.4, 128.3, 128.2, 128.2, 128.1, 127.9, 127.7, 127.7, 127.6, 127.4, 127.3, 127.1, 126.8, 126.7, 126.4, 125.9, 125.6, 125.4, 111.7 (q,  $^1J_{\text{C},\text{F}}$  = 287 Hz,  $\text{CF}_3$ ), 99.8, 98.5, 97.4, 94.4, 77.9, 77.8, 74.9, 74.8, 73.3, 72.6, 72.5, 72.0, 71.7, 71.6, 71.1, 70.7, 70.2, 69.9, 69.5, 69.1, 67.6, 66.8, 66.5, 66.2, 65.8, 53.9, 53.1, 51.7, 51.5, 50.5, 49.9, 32.2 (t,  $^2J_{\text{C},\text{F}}$  = 21.6 Hz,  $\text{CH}_2\text{CF}_2$ ), 28.8, 27.5, 25.7 (t,  $^3J_{\text{C},\text{F}}$  = 5.0 Hz,  $\text{CH}_2\text{CH}_2\text{CF}_2$ ), 23.2, 22.0; HRMS (ESI-TOF)  $m/z$  [ $\text{M} + \text{H}$ ] $^+$  calcd for  $\text{C}_{109}\text{H}_{113}\text{F}_{16}\text{N}_3\text{O}_{28}$  2216.7334; Found 2216.7346.

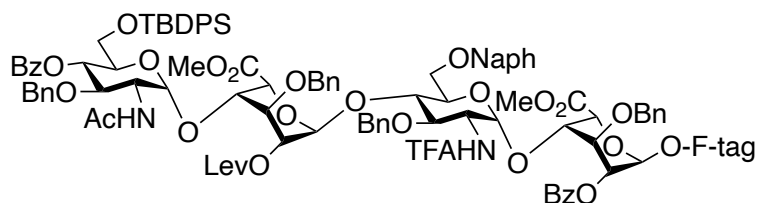

**S38**

***N*-(Benzyl)-3,3,4,4,5,5,6,6,7,7,8,8,8-tridecafluorooctyl-benzoyloxycarbonyl-5-aminopentyl (2-acetamido-3-O-benzyl-4-O-benzoyl-2-deoxy-6-O-tert-butylidiphenylsilyl- $\alpha$ -D-glucopyranosyl)-(1 $\rightarrow$ 4)-(methyl 3-O-benzyl-2-O-levulinoyl- $\alpha$ -**

**L-idopyranosyluronate)-(1→4)-(3-O-benzyl-2-deoxy-6-O-2-naphthylmethyl-2-trifluoroacetamido- $\alpha$ -D-glucopyranosyl)-(1→4)-(methyl 3-O-benzyl-2-O-benzoyl- $\alpha$ -L-idopyranosyluronate (S38).**

Compound **76** (0.34 g, 0.13 mmol) was treated according to the general procedure for N<sub>3</sub> to NHAc conversion to give tetrasaccharide **S38** (0.29 g, 84%); *R<sub>f</sub>* 0.66 (1:2 hexanes/EtOAc); <sup>1</sup>H NMR (400 MHz, CD<sub>3</sub>COCD<sub>3</sub>):  $\delta$  8.33 (d, *J* = 9.4 Hz, 1H, NH), 8.03–7.96 (m, 6H, Ar), 7.92–7.83 (m, 2H, Ar), 7.76–7.62 (m, 6H, Ar), 7.58–7.42 (m, 7H, Ar), 7.39–6.98 (m, 34H, Ar), 5.69 (t, *J* = 9.7 Hz, 1H, H-4'''), 5.50 (d, *J* = 4.8 Hz, 1H, H-1''), 5.28–5.20 (m, 4H, H-1', H-1''', H-2'', H-1), 5.15–5.12 (m, 3H, H-2, NCO<sub>2</sub>CH<sub>2</sub>), 4.91–4.70 (m, 9H, H-5, H-5'', CH<sub>2</sub>Ph, CH<sub>2</sub>Nap), 5.61 (d, *J* = 11.0 Hz, 1H, CH<sub>2</sub>Ph), 4.51–4.38 (m, 6H), 4.29–4.14 (m, 6H), 4.10–4.04 (m, 2H), 3.96–3.88 (m, 2H), 3.85–3.64 (m, 7H), 3.50–3.40 (m, 4H, OCH<sub>2</sub>CH<sub>2</sub>, OCH<sub>3</sub>), 3.19–3.08 (m, 2H, NCH<sub>2</sub>), 2.98–2.94 (m, 2H, PhCH<sub>2</sub>CH<sub>2</sub>), 2.74–2.69 (m, 2H), 2.60–2.36 (m, 4H, CH<sub>2</sub>, PhCH<sub>2</sub>CH<sub>2</sub>), 2.07 (s, 3H, CH<sub>3</sub>C=O), 1.80 (s, 3H, CH<sub>3</sub>C=ON), 1.63–1.53 (m, 4H, 2 X CH<sub>2</sub>), 1.40–1.27 (m, 2H, CH<sub>2</sub>), 1.02 (s, 9H, (CH<sub>3</sub>)<sub>3</sub>C); <sup>13</sup>C NMR (100 MHz, CD<sub>3</sub>COCD<sub>3</sub>):  $\delta$  206.0 (CH<sub>3</sub>C=OCH<sub>2</sub>), 171.7, 169.5, 169.3, 168.9, 165.0, 164.7, 157.0 (q, <sup>2</sup>*J*<sub>C,F</sub> = 37.0 Hz, CF<sub>3</sub>C=O), 138.9, 138.8, 138.6, 138.5, 138.0, 138.0, 136.3, 135.6, 135.5, 133.5, 133.3, 133.1, 133.0, 130.1, 129.8, 129.7, 129.6, 129.6, 129.5, 128.8, 128.7, 128.5, 128.4, 128.4, 128.2, 128.0, 128.0, 127.9, 127.7, 127.7, 127.6, 127.5, 127.5, 127.4, 127.2, 127.1, 126.8, 126.3, 126.1, 126.0, 125.8, 116.1 (q, <sup>1</sup>*J*<sub>C,F</sub> = 287 Hz, CF<sub>3</sub>), 99.0, 98.2, 97.7, 97.6, 77.9, 77.5, 76.5, 75.9, 75.5, 74.1, 73.9, 73.3, 73.3, 73.0, 72.7, 72.5, 72.2, 71.4, 70.9, 70.7, 70.2, 69.2, 68.3, 67.8, 66.3, 62.2, 59.7, 53.7, 52.3, 51.5, 51.4, 50.1, 49.8, 46.9, 46.0, 37.3 (CH<sub>2</sub>C=O), 32.2 (t, <sup>2</sup>*J*<sub>C,F</sub> = 21.6 Hz, CH<sub>2</sub>CF<sub>2</sub>), 29.0, 28.9, 27.7 (CH<sub>2</sub>C=O), 27.5, 26.2 ((CH<sub>3</sub>)<sub>3</sub>C), 25.7 (t, <sup>3</sup>*J*<sub>C,F</sub> = 5.0 Hz, CH<sub>2</sub>CH<sub>2</sub>CF<sub>2</sub>), 23.1, 22.2, 18.9 ((CH<sub>3</sub>)<sub>3</sub>C); HRMS (ESI-TOF) *m/z* [M + H]<sup>+</sup> calcd for C<sub>132</sub>H<sub>136</sub>F<sub>16</sub>N<sub>3</sub>O<sub>29</sub>Si 2558.8773; Found 2558.8794.

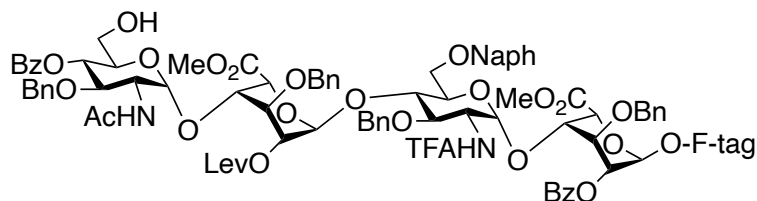

**S39**

***N*-(Benzyl)-3,3,4,4,5,5,6,6,7,7,8,8,8-tridecafluorooctyl-benzoyloxycarbonyl-5-aminopentyl (2-acetamido-3-*O*-benzyl-4-*O*-benzoyl-2-deoxy- $\alpha$ -D-glucopyranosyl)-(1 $\rightarrow$ 4)-(methyl 3-*O*-benzyl-2-*O*-levulinoyl- $\alpha$ -L-idopyranosyluronate)-(1 $\rightarrow$ 4)-(3-*O*-benzyl-2-deoxy-6-*O*-2-naphthylmethyl-2-trifluoroacetamido- $\alpha$ -D-glucopyranosyl)-(1 $\rightarrow$ 4)-(methyl 3-*O*-benzyl-2-*O*-benzoyl- $\alpha$ -L-idopyranosyluronate (S39).**

Compound **S38** (80 mg, 0.031 mmol) was treated according to the general procedure for TBDPS deprotection to give tetrasaccharide **S39** (70 mg, 96%);  $R_f$  0.19 (1:2 hexanes/EtOAc);  $^1\text{H}$  NMR (400 MHz,  $\text{CD}_3\text{COCD}_3$ ):  $\delta$  8.40 (d,  $J$  = 8.6 Hz, 1H, NH), 8.03–7.84 (m, 9H, Ar), 7.75–7.73 (m, 3H, Ar), 7.69–7.63 (m, 1H, Ar), 7.60–7.07 (m, 33H, Ar), 5.56 (d,  $J$  = 5.0 Hz, 1H, H-1"), 5.33–5.27 (m, 3H), 5.22 (dd,  $J$  = 5.2, 4.4 Hz, 1H), 5.21 (dd,  $J$  = 5.2, 4.3 Hz, 1H, H-2), 5.19 (d,  $J$  = 3.3 Hz, 1H), 5.16–5.10 (m, 3H), 4.93–4.71 (m, 9H), 4.64 (d,  $J$  = 11.2 Hz, 1H), 4.54 (d,  $J$  = 11.2 Hz, 1H), 4.47 (s, 2H,  $\text{NCH}_2\text{Ph}$ ), 4.44–4.37 (m, 3H), 4.34–4.07 (m, 8H), 3.97–3.91 (m, 2H), 3.84 (dd,  $J$  = 10.6, 8.8 Hz, 1H), 3.77–3.69 (m, 5H), 3.65–3.61 (m, 4H), 3.50–3.40 (m, 1H), 3.17–3.10 (m, 2H,  $\text{NCH}_2$ ), 2.98–2.94 (m, 2H,  $\text{PhCH}_2\text{CH}_2$ ), 2.74–2.37 (m, 6H,  $\text{CH}_2$ ), 2.07 (s, 3H,  $\text{CH}_3\text{C}=\text{O}$ ), 1.80 (s, 3H,  $\text{CH}_3\text{C}=\text{ONH}$ ), 1.60–1.48 (m, 4H, 2 X  $\text{CH}_2$ ), 1.35–1.27 (m, 2H,  $\text{CH}_2$ );  $^{13}\text{C}$  NMR (100 MHz,  $\text{CD}_3\text{COCD}_3$ ):  $\delta$  206.0, 171.6, 169.6, 169.4, 169.3, 165.2, 165.0, 156.9 (q,  $^2J_{\text{C},\text{F}}$  = 37.0 Hz,  $\text{CF}_3\text{C}=\text{O}$ ), 149.0, 138.9, 138.7, 138.6, 138.5, 138.1, 138.0, 137.0, 136.4, 134.3, 134.2, 133.5, 133.4, 133.3, 133.1, 132.5, 132.4, 130.5, 129.9, 129.8, 129.6, 129.5, 128.8, 128.7, 128.5, 128.4, 128.4, 128.2, 128.1, 128.0, 127.9, 127.8, 127.7, 127.7, 127.6, 127.5, 127.5, 127.4, 127.2, 127.1, 127.0, 126.3, 126.1, 126.0, 125.8, 124.2, 115.8 (q,  $^1J_{\text{C},\text{F}}$  = 287 Hz,  $\text{CF}_3$ ), 99.0, 98.3, 97.9, 97.6, 77.8, 77.4, 76.6, 76.1, 76.0, 74.3, 73.8, 73.6, 73.3, 73.3, 72.8, 72.8, 72.2, 71.8, 71.3, 71.1, 70.8, 70.4, 69.3, 68.3, 67.8, 66.3, 61.1, 53.8, 52.4, 51.5, 50.1, 49.8, 46.9, 46.0,

37.3, 32.2 (t,  $^2J_{C,F} = 22.3$  Hz,  $\text{CH}_2\text{CF}_2$ ), 29.1, 29.0, 27.7, 27.5, 25.7 (t,  $^3J_{C,F} = 4.0$  Hz,  $\text{CH}_2\text{CH}_2\text{CF}_2$ ), 23.1, 22.2; HRMS (ESI-TOF)  $m/z$   $[\text{M} + \text{H}]^+$  calcd for  $\text{C}_{116}\text{H}_{118}\text{F}_{16}\text{N}_3\text{O}_{29}$  2320.7596; Found 2320.7573.

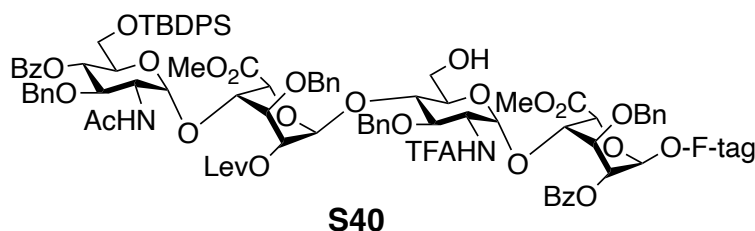

***N*-(Benzyl)-3,3,4,4,5,5,6,6,7,7,8,8,8-tridecafluorooctyl-benzylloxycarbonyl-5-aminopentyl (2-acetamido-3-*O*-benzyl-4-*O*-benzoyl-2-deoxy-6-*O*-tert-butylidiphenylsilyl- $\alpha$ -D-glucopyranosyl)-(1→4)-(methyl 3-*O*-benzyl-2-*O*-levulinoyl- $\alpha$ -L-idopyranosyluronate)-(1→4)-(3-*O*-benzyl-2-deoxy-2-trifluoroacetamido- $\alpha$ -D-glucopyranosyl)-(1→4)-methyl-3-*O*-benzyl-2-*O*-benzoyl- $\alpha$ -L-idopyranosyluronate (S40).**

Compound **S38** (0.18 g, 0.069 mmol) was treated according to the general procedure for Nap deprotection to give tetrasaccharide **S40** (0.15 g, 88%);  $R_f$  0.31 (3:2 hexanes/acetone);  $^1\text{H}$  NMR (400 MHz,  $\text{CD}_3\text{COCD}_3$ ):  $\delta$  8.44 (d,  $J = 8.9$  Hz, 1H, NH), 8.05–8.00 (m, 4H, Ar), 7.75–7.63 (m, 5H, Ar), 7.57–7.52 (m, 5H, Ar), 7.39–7.09 (m, 35H, Ar), 5.70 (d,  $J = 5.9$  Hz, 1H, H-1''), 5.59 (t,  $J = 9.9$  Hz, 1H, H-4'''), 5.26–5.13 (m, 7H,  $\text{NCO}_2\text{CH}_2$ , H-1''', H-1', H-2'', H-1, H-2), 4.96–4.91 (m, 2H,  $\text{CH}_2\text{Ph}$ ), 4.88 (d,  $J = 3.7$  Hz, 1H, H-5), 4.82 (d,  $J = 4.5$  Hz, 1H, H-5''), 4.81–4.69 (m, 4H,  $\text{CH}_2\text{Ph}$ ), 4.57–4.43 (m, 5H), 4.42–4.26 (m, 5H), 4.24–4.02 (m, 6H), 3.93 (dd,  $J = 10.6, 9.4$  Hz, 1H), 3.86 (dd,  $J = 10.6, 9.3$  Hz, 1H), 3.82–3.73 (m, 6H), 3.69 (s, 3H,  $\text{OCH}_3$ ), 3.52–3.43 (m, 1H,  $\text{OCH}_2\text{CH}_2$ ), 3.20–3.09 (m, 2H,  $\text{NCH}_2$ ), 2.98–2.94 (m, 2H,  $\text{PhCH}_2\text{CH}_2$ ), 2.87–2.82 (m, 2H,  $\text{CH}_2$ ), 2.70–2.47 (m, 4H,  $\text{CH}_2$ ,  $\text{PhCH}_2\text{CH}_2$ ), 2.13 (s, 3H,  $\text{CH}_3\text{C}=\text{O}$ ), 1.96 (s, 3H,  $\text{CH}_3\text{C}=\text{ON}$ ), 1.63–1.53 (m, 4H, 2 X  $\text{CH}_2$ ), 1.40–1.27 (m, 2H,  $\text{CH}_2$ ), 1.01 (s, 9H,  $(\text{CH}_3)_3\text{C}$ );  $^{13}\text{C}$  NMR (100 MHz,  $\text{CD}_3\text{COCD}_3$ ):  $\delta$  206.2 ( $\text{CH}_3\text{C}=\text{OCH}_2$ ), 171.9, 169.5, 169.5, 169.3, 165.0, 164.8, 157.0 (q,  $^2J_{C,F} = 37.0$  Hz,

CF<sub>3</sub>C=O), 139.1, 138.9, 138.6, 138.5, 138.1, 138.0, 135.6, 135.4, 133.3, 133.1, 133.0, 130.1, 129.8, 129.7, 129.6, 129.5, 128.8, 128.7, 128.5, 128.4, 128.3, 128.2, 128.0, 127.7, 127.7, 127.7, 127.6, 127.6, 127.5, 127.4, 127.3, 127.2, 127.1, 126.8, 116.1 (q, <sup>1</sup>J<sub>C,F</sub> = 287 Hz, CF<sub>3</sub>), 99.1 (C-1), 98.0 (C-1''), 97.9 (C-1'), 96.3 (C-1'''), 77.8, 76.9, 76.6, 76.2, 75.4, 74.2, 73.9, 73.6, 73.1, 72.7, 72.4, 72.0, 71.6, 71.4, 70.8, 70.5, 69.0, 68.3, 66.3, 62.6, 60.1, 59.7, 54.1, 53.9, 52.4, 51.6, 51.5, 50.1, 49.8, 46.9, 46.0, 37.5 (CH<sub>2</sub>C=O), 32.2 (t, <sup>2</sup>J<sub>C,F</sub> = 21.6 Hz, CH<sub>2</sub>CF<sub>2</sub>), 29.1, 28.8, 27.8, 27.4, 26.2 ((CH<sub>3</sub>)<sub>3</sub>C), 25.7 (t, <sup>3</sup>J<sub>C,F</sub> = 5.0 Hz, CH<sub>2</sub>CH<sub>2</sub>CF<sub>2</sub>), 23.1, 22.3, 18.9; HRMS (ESI-TOF) m/z [M + Na]<sup>+</sup> calcd for C<sub>121</sub>H<sub>127</sub>F<sub>16</sub>N<sub>3</sub>O<sub>29</sub>SiNa 2440.7966; Found 2440.7954.

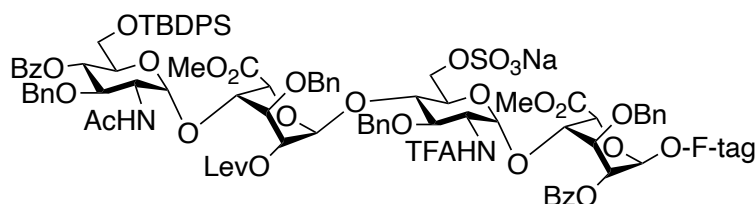

**S41**

***N*-(Benzyl)-3,3,4,4,5,5,6,6,7,7,8,8,8-tridecafluorooctyl-benzyloxycarbonyl-5-aminopentyl (2-acetamido-3-*O*-benzyl-4-*O*-benzoyl-2-deoxy-6-*O*-*tert*-butyldiphenylsilyl- $\alpha$ -D-glucopyranosyl)-(1 $\rightarrow$ 4)-(methyl 3-*O*-benzyl-2-*O*-levulinoyl- $\alpha$ -L-idopyranosyluronate)-(1 $\rightarrow$ 4)-(3-*O*-benzyl-2-deoxy-6-*O*-sulfonato-2-trifluoroacetamido- $\alpha$ -D-glucopyranosyl)-(1 $\rightarrow$ 4)-methyl-3-*O*-benzyl-2-*O*-benzoyl- $\alpha$ -L-idopyranosyluronate (S41).**

Compound **S40** (60 mg, 0.025 mmol) was treated according to the general procedure for *O*-sulfation to give tetrasaccharide **S41** (59 mg, 94%); *R*<sub>f</sub> 0.42 (8:1 DCM/MeOH); <sup>1</sup>H NMR (400 MHz, CD<sub>3</sub>OD):  $\delta$  9.00 (d, *J* = 9.6 Hz, 1H, NH), 7.97–7.87 (m, 6H, Ar), 7.66–7.40 (m, 10H, Ar), 7.35–7.00 (m, 33H, Ar), 5.50 (d, *J* = 3.5 Hz, 1H), 5.35 (t, *J* = 9.7 Hz, 1H), 5.20–5.06 (m, 7H), 4.94–4.90 (m, 1H), 4.83–4.80 (m, 2H), 4.74–4.59 (m, 5H), 4.52–4.07 (m, 13H), 4.00–3.64 (m, 10H), 3.55–3.38 (m, 4H), 3.15–3.04 (m, 2H, NCH<sub>2</sub>), 2.92–2.88 (m, 2H), 2.84–2.37 (m, 6H), 2.13 (s, 3H, CH<sub>3</sub>C=O), 2.04 (s, 3H, CH<sub>3</sub>C=ON), 1.63–1.53 (m,

4H, 2 X CH<sub>2</sub>), 1.40–1.27 (m, 2H, CH<sub>2</sub>), 0.95 (s, 9H, (CH<sub>3</sub>)<sub>3</sub>C); <sup>13</sup>C NMR (100 MHz, CD<sub>3</sub>OD): δ 207.9, 172.4, 170.4, 169.8, 165.6, 165.2, 163.5, 157.0 (q, <sup>2</sup>J<sub>C,F</sub> = 37.0 Hz, CF<sub>3</sub>C=O), 138.1, 138.0, 137.6, 137.5, 135.3, 135.3, 135.2, 135.2, 133.2, 133.0, 132.7, 129.6, 129.4, 129.4, 129.4, 128.5, 128.4, 128.2, 128.1, 128.1, 128.0, 127.9, 127.8, 127.7, 127.7, 127.6, 127.5, 127.5, 127.4, 127.4, 127.3, 127.1, 126.9, 126.7, 126.5, 116.1 (q, <sup>1</sup>J<sub>C,F</sub> = 287 Hz, CF<sub>3</sub>), 99.0, 97.9, 96.2, 94.7, 77.5, 77.2, 75.0, 74.4, 74.3, 73.5, 73.0, 72.5, 72.4, 72.3, 71.4, 71.0, 70.9, 70.7, 69.7, 69.1, 68.9, 66.8, 64.9, 62.9, 53.1, 52.9, 52.0, 51.6, 50.1, 49.9, 46.1, 37.3, 32.2 (t, <sup>2</sup>J<sub>C,F</sub> = 21.6 Hz, CH<sub>2</sub>CF<sub>2</sub>), 28.7, 28.2, 27.5, 27.3, 25.9, 25.7 (t, <sup>3</sup>J<sub>C,F</sub> = 5.0 Hz, CH<sub>2</sub>CH<sub>2</sub>CF<sub>2</sub>), 23.0, 21.9, 18.6; HRMS (ESI-TOF) m/z [M - Na]<sup>-1</sup> calcd for C<sub>121</sub>H<sub>126</sub>F<sub>16</sub>N<sub>3</sub>O<sub>32</sub>SSi 2496.7559; Found 2496.7532.

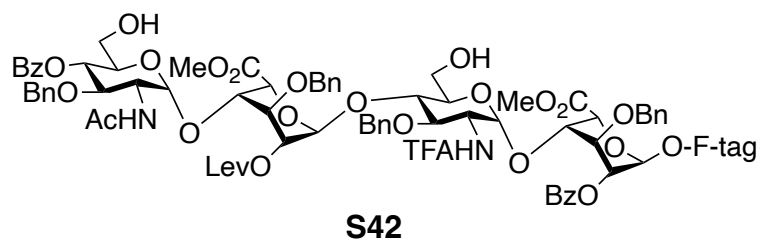

***N*-(Benzyl)-3,3,4,4,5,5,6,6,7,7,8,8,8-tridecafluorooctyl-benzyloxycarbonyl-5-aminopentyl (2-acetamido-3-*O*-benzyl-4-*O*-benzoyl-2-deoxy- $\alpha$ -D-glucopyranosyl)-(1 $\rightarrow$ 4)-(methyl 3-*O*-benzyl-2-*O*-levulinoyl- $\alpha$ -L-idopyranosyluronate)-(1 $\rightarrow$ 4)-(3-*O*-benzyl-2-deoxy-2-trifluoroacetamido- $\alpha$ -D-glucopyranosyl)-(1 $\rightarrow$ 4)-methyl-3-*O*-benzyl-2-*O*-benzoyl- $\alpha$ -L-idopyranosyluronate (S42).**

Compound **S40** (60 mg, 0.025 mmol) was treated according to the general procedure for TBDPS deprotection to give tetrasaccharide **S42** (51 mg, 95%); *R*<sub>f</sub> 0.10 (1:3 hexanes/EtOAc); <sup>1</sup>H NMR (400 MHz, CD<sub>3</sub>COCD<sub>3</sub>): δ 8.41 (d, *J* = 9.0 Hz, 1H, NH), 8.04–8.02 (m, 4H, Ar), 7.68–7.64 (m, 1H, Ar), 7.56–7.50 (m, 5H, Ar), 7.43–7.10 (m, 29H, Ar), 5.66 (d, *J* = 6.0 Hz, 1H, H-1''), 5.34 (t, *J* = 9.8 Hz, 1H, H-4'''), 5.26–5.12 (m, 7H, H-1''', H-1', H-1, H-2, H-2'', NCO<sub>2</sub>CH<sub>2</sub>), 4.95–4.87 (m, 4H), 4.83 (d, *J* = 11.5 Hz, 1H), 4.81 (d, *J* = 11.5 Hz, 1H), 4.74 (d, *J* = 11.5 Hz, 1H), 4.70 (d, *J* = 11.0 Hz, 1H), 4.58 (d, *J* = 11.0 Hz,

1H), 4.47–4.34 (m, 6H), 4.28–4.01 (m, 7H), 3.96 (dd,  $J = 10.7, 9.4$  Hz, 1H), 3.88 (dd,  $J = 10.5, 9.0$  Hz, 1H), 3.79 (s, 3H, OCH<sub>3</sub>), 3.74 (s, 3H, OCH<sub>3</sub>), 3.74–3.59 (m, 3H), 3.52–3.42 (m, 1H), 3.17–3.09 (m, 2H, NCH<sub>2</sub>), 2.98–2.94 (m, 2H, PhCH<sub>2</sub>CH<sub>2</sub>), 2.86–2.82 (m, 2H, CH<sub>2</sub>), 2.70–2.47 (m, 4H), 2.12 (s, 3H, CH<sub>3</sub>C=O), 1.93 (s, 3H, CH<sub>3</sub>C=O), 1.56–1.43 (m, 4H, 2 X CH<sub>2</sub>), 1.33–1.23 (m, 2H, CH<sub>2</sub>); <sup>13</sup>C NMR (100 MHz, CD<sub>3</sub>COCD<sub>3</sub>): δ 206.2, 171.8, 169.6, 169.4, 169.4, 165.1, 165.0, 157.0 (q, <sup>2</sup> $J_{C,F} = 37.0$  Hz, CF<sub>3</sub>C=O), 139.0, 138.9, 138.6, 138.5, 138.2, 138.0, 133.3, 133.3, 129.9, 129.6, 129.5, 128.8, 128.7, 128.5, 128.4, 128.4, 128.2, 128.0, 127.8, 127.7, 127.7, 127.5, 127.5, 127.4, 127.4, 127.3, 126.9, 116.0 (q, <sup>1</sup> $J_{C,F} = 287$  Hz, CF<sub>3</sub>), 99.1, 98.1, 97.9, 96.9, 77.7, 76.9, 76.7, 76.4, 76.2, 75.9, 74.1, 74.0, 73.6, 73.2, 72.8, 72.7, 72.1, 71.7, 71.6, 71.4, 71.1, 70.5, 69.1, 68.3, 66.3, 61.0, 60.9, 60.1, 60.0, 54.1, 53.8, 52.4, 51.6, 51.5, 50.1, 49.8, 46.8, 46.0, 37.5, 32.2 (t, <sup>2</sup> $J_{C,F} = 21.6$  Hz, CH<sub>2</sub>CF<sub>2</sub>), 27.8, 25.7 (t, <sup>3</sup> $J_{C,F} = 4.1$  Hz, CH<sub>2</sub>CH<sub>2</sub>CF<sub>2</sub>), 23.1, 22.3; HRMS (ESI-TOF)  $m/z$  [M + 2H]<sup>+</sup>2 calcd for C<sub>105</sub>H<sub>111</sub>F<sub>16</sub>N<sub>3</sub>O<sub>29</sub> 1090.8524; Found 1090.8552.

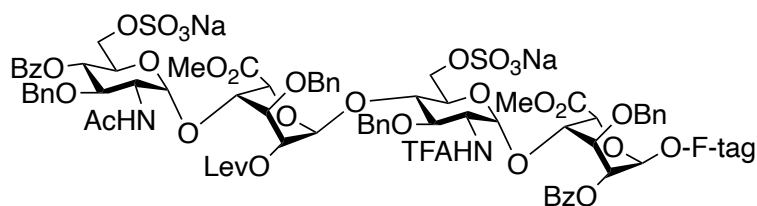

**S43**

***N*-(Benzyl)-3,3,4,4,5,5,6,6,7,7,8,8,8-tridecafluorooctyl-benzoyloxycarbonyl-5-aminopentyl (2-acetamido-3-*O*-benzyl-4-*O*-benzoyl-2-deoxy-6-*O*-sulfonato- $\alpha$ -D-glucopyranosyl)-(1 $\rightarrow$ 4)-(methyl 3-*O*-benzyl-2-*O*-levulinoyl- $\alpha$ -L-idopyranosyluronic acid)-(1 $\rightarrow$ 4)-(3-*O*-benzyl-2-deoxy-6-*O*-sulfonato-2-trifluoroacetamido- $\alpha$ -D-glucopyranosyl)-(1 $\rightarrow$ 4)-methyl-3-*O*-benzyl-2-*O*-benzoyl- $\alpha$ -L-idopyranosyluronic acid (S43).**

Compound **S42** (57 mg, 0.025 mmol) was treated according to the general procedure for *O*-sulfation to give tetrasaccharide **S43** (57 mg, 92%);  $R_f$  0.53 (6:1 DCM/MeOH); <sup>1</sup>H NMR (400 MHz, CD<sub>3</sub>COCD<sub>3</sub>): δ 8.33 (d,  $J = 9.0$  Hz, 1H, NH), 8.08–8.04 (m, 4H, Ar), 7.64–7.44



(m, 8H, Ar), 7.35–7.08 (m, 27H, Ar), 5.71 (d,  $J = 4.1$  Hz, 1H, H-1''), 5.31–5.11 (m, 8H, H-1''', H-1', H-1, H-2, H-2'', H-4''', NCO<sub>2</sub>CH<sub>2</sub>), 4.94–4.73 (m, 8H, H-5', H-2, 3XCH<sub>2</sub>Ph), 4.57 (d,  $J = 11.0$  Hz, 1H), 4.48 (s, 2H, N-CH<sub>2</sub>Ph), 4.43–4.24 (m, 9H), 4.20–4.16 (m, 2H), 4.11–4.01 (m, 3H), 3.87–3.75 (m, 8H), 3.53–3.46 (m, 1H), 3.19–3.12 (m, 2H, NCH<sub>2</sub>), 2.97–2.94 (m, 2H, PhCH<sub>2</sub>CH<sub>2</sub>), 2.90–2.48 (m, 6H), 2.70–2.47 (m, 4H), 2.11 (s, 3H, CH<sub>3</sub>C=O), 1.97 (s, 3H, CH<sub>3</sub>C=O), 1.56–1.43 (m, 4H, 2 X CH<sub>2</sub>), 1.33–1.23 (m, 2H, CH<sub>2</sub>); <sup>13</sup>C NMR (100 MHz, CD<sub>3</sub>COCD<sub>3</sub>): δ 206.7, 172.1, 170.5, 169.8, 165.5, 165.1, 157.0 (q, <sup>2</sup>J<sub>C,F</sub> = 37.0 Hz, CF<sub>3</sub>C=O), 138.9, 138.9, 138.7, 138.6, 138.2, 138.0, 133.3, 133.3, 130.0, 129.8, 129.7, 129.6, 128.8, 128.7, 128.5, 128.4, 128.4, 128.2, 128.2, 127.9, 127.8, 127.8, 127.7, 127.6, 127.5, 127.3, 127.3, 127.1, 127.0, 116.0 (q, <sup>1</sup>J<sub>C,F</sub> = 287 Hz, CF<sub>3</sub>), 99.1, 97.7, 97.1, 97.0, 77.1, 76.4, 74.9, 74.3, 74.2, 74.0, 73.3, 72.5, 72.2, 71.6, 71.1, 70.2, 69.5, 68.7, 68.3, 66.3, 65.8, 64.4, 53.6, 52.9, 52.4, 51.9, 50.1, 49.8, 46.3, 37.5, 32.2 (t, <sup>2</sup>J<sub>C,F</sub> = 21.6 Hz, CH<sub>2</sub>CF<sub>2</sub>), 29.0, 25.7 (t, <sup>3</sup>J<sub>C,F</sub> = 4.1 Hz, CH<sub>2</sub>CH<sub>2</sub>CF<sub>2</sub>), 23.1, 22.3. HRMS (ESI-TOF) m/z [M - Na]<sup>-</sup> calcd for C<sub>105</sub>H<sub>107</sub>F<sub>16</sub>N<sub>3</sub>NaO<sub>35</sub>S<sub>2</sub> 2360.5769; Found 2360.5784.

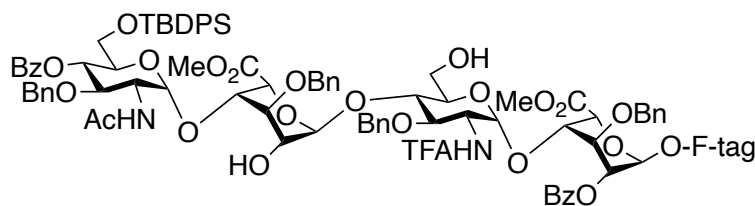

**S44**

***N*-(Benzyl)-3,3,4,4,5,5,6,6,7,7,8,8,8-tridecafluorooctyl-benzoyloxycarbonyl-5-aminopentyl (2-acetamido-3-*O*-benzyl-4-*O*-benzoyl-2-deoxy-6-*O*-*tert*-butyldiphenylsilyl- $\alpha$ -D-glucopyranosyl)-(1→4)-(methyl 3-*O*-benzyl-2-*O*-levulinoyl- $\alpha$ -L-idopyranosyluronate)-(1→4)-(3-*O*-benzyl-2-deoxy-2-trifluoroacetamido- $\alpha$ -D-glucopyranosyl)-(1→4)-methyl-3-*O*-benzyl-2-*O*-benzoyl- $\alpha$ -L-idopyranosyluronate (S44).**

Compound **S40** (80 mg, 0.033 mmol) was treated according to the general procedure for TBDPS deprotection to give tetrasaccharide **S44** (74 mg, 96%);  $R_f$  0.26 (3:2

hexanes/acetone);  $^1\text{H}$  NMR (400 MHz,  $\text{CD}_3\text{COCD}_3$ ):  $\delta$  8.34 (d,  $J = 9.4$  Hz, 1H, NH), 8.05–8.01 (m, 4H), 7.77–7.75 (m, 2H), 7.70–7.63 (m, 3H), 7.59–7.46 (m, 7H), 7.43–7.09 (m, 33H), 5.64 (t,  $J = 9.7$  Hz, 1H), 5.43 (d,  $J = 4.0$  Hz, 1H), 5.24–5.10 (m, 6H), 4.93 (d,  $J = 11.5$  Hz, 1H), 4.87–4.81 (m, 4H), 4.78 (d,  $J = 11.5$  Hz, 1H), 4.71 (d,  $J = 11.5$  Hz, 1H), 4.69 (d,  $J = 11.0$  Hz, 1H), 4.56 (d,  $J = 11.0$  Hz, 1H), 4.47 (s, 2H), 4.44–4.37 (m, 3H), 4.27–4.21 (m, 3H), 4.17–3.98 (m, 6H), 3.96–3.86 (m, 3H), 3.82–3.73 (m, 6H), 3.51–3.43 (m, 1H), 3.39 (s, 3H,  $\text{OCH}_3$ ), 3.18–3.10 (m, 2H,  $\text{NCH}_2$ ), 2.98–2.94 (m, 2H,  $\text{PhCH}_2\text{CH}_2$ ), 2.61–2.47 (m, 2H), 1.83 (s, 3H,  $\text{CH}_3\text{C}=\text{O}$ ), 1.56–1.43 (m, 4H), 1.33–1.23 (m, 2H), 1.03 (s, 9H,  $(\text{CH}_3)_3\text{C}$ );  $^{13}\text{C}$  NMR (100 MHz,  $\text{CD}_3\text{COCD}_3$ ):  $\delta$  135.7, 135.5, 133.3, 133.2, 129.6, 129.5, 128.8, 128.3, 128.0, 127.9, 127.6, 126.8, 101.2, 99.1, 97.9, 96.9, 78.2, 77.5, 76.7, 75.9, 75.6, 74.3, 73.6, 73.6, 73.4, 72.7, 72.5, 72.1, 71.1, 70.3, 70.2, 70.0, 69.5, 69.1, 68.4, 66.3, 53.7, 52.4, 51.7, 51.1, 50.0, 46.4, 32.1, 29.2, 27.5, 26.3, 25.8, 23.2, 22.1; HRMS (ESI-TOF)  $m/z$   $[\text{M} + \text{H}]^+$  calcd for  $\text{C}_{116}\text{H}_{122}\text{F}_{16}\text{N}_3\text{O}_{27}\text{Si}$  2320.7778; Found 2320.7788.

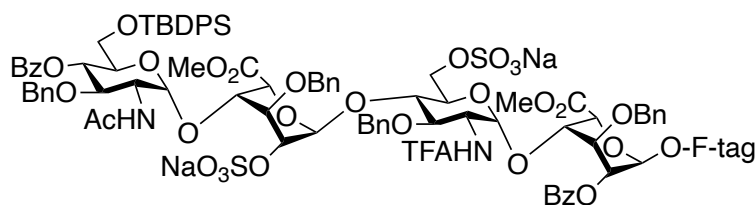

**S45**

***N*-(Benzyl)-3,3,4,4,5,5,6,6,7,7,8,8,8-tridecafluorooctyl-benzoyloxycarbonyl-5-aminopentyl (2-acetamido-3-*O*-benzyl-4-*O*-benzoyl-2-deoxy-6-*O*-*tert*-butyldiphenylsilyl- $\alpha$ -D-glucopyranosyl)-(1 $\rightarrow$ 4)-(methyl 3-*O*-benzyl-2-*O*-sulfonato- $\alpha$ -L-idopyranosyluronate)-(1 $\rightarrow$ 4)-(3-*O*-benzyl-2-deoxy-6-*O*-sulfonato-2-trifluoroacetamido- $\alpha$ -D-glucopyranosyl)-(1 $\rightarrow$ 4)-methyl-3-*O*-benzyl-2-*O*-benzoyl- $\alpha$ -L-idopyranosyluronate (S45).**

Compound **S44** (74 mg, 0.032 mmol) was treated according to the general procedure for *O*-sulfation to give tetrasaccharide **S45** (74 mg, 92%);  $R_f$  0.26 (8:1 DCM/MeOH);  $^1\text{H}$  NMR (400 MHz,  $\text{CD}_3\text{COCD}_3$ ):  $\delta$  8.30 (d,  $J = 9.0$  Hz, 1H, NH), 8.06–8.01 (m, 8H), 7.74–7.52 (m,

10H), 7.46–7.07 (m, 31H), 5.60–5.55 (m, 2H), 5.24–5.23 (m, 3H), 5.14–5.12 (m, 2H), 5.02 (d,  $J = 3.3$  Hz, 1H), 4.99 (d,  $J = 12.0$  Hz, 1H), 4.94 (d,  $J = 2.5$  Hz, 1H), 4.90 (d,  $J = 2.8$  Hz, 1H), 4.88–4.72 (m, 6H), 4.56 (d,  $J = 11.0$  Hz, 1H), 4.48 (s, 2H), 4.46–4.39 (m, 5H), 4.27–4.13 (m, 6H), 4.07 (dd,  $J = 10.5, 9.3$  Hz, 1H), 4.02 (dt,  $J = 10.2, 2.1$  Hz, 1H), 3.85–3.69 (m, 7H), 3.51–3.43 (m, 1H), 3.32 (s, 3H, OCH<sub>3</sub>), 3.18–3.10 (m, 2H, NCH<sub>2</sub>), 2.98–2.94 (m, 2H, PhCH<sub>2</sub>CH<sub>2</sub>), 2.61–2.47 (m, 2H), 2.14 (s, 3H, CH<sub>3</sub>C=O), 1.56–1.43 (m, 4H), 1.33–1.23 (m, 2H), 1.01 (s, 9H, (CH<sub>3</sub>)<sub>3</sub>C); <sup>13</sup>C NMR (100 MHz, CD<sub>3</sub>COCD<sub>3</sub>):  $\delta$  135.7, 135.5, 133.4, 133.2, 129.7, 129.6, 128.8, 128.4, 128.3, 128.0, 127.8, 127.7, 127.5, 99.0, 98.8, 98.2, 97.5, 77.7, 77.5, 76.3, 74.3, 74.2, 74.0, 73.7, 73.5, 72.5, 72.5, 72.0, 71.0, 70.9, 70.6, 69.1, 68.7, 68.4, 66.3, 64.9, 62.3, 53.5, 52.1, 51.4, 49.9, 46.6, 32.2, 31.1, 29.0, 27.5, 26.3, 25.7, 23.2; HRMS (ESI-TOF)  $m/z$  [M – 2Na + H]<sup>-1</sup> calcd for C<sub>116</sub>H<sub>120</sub>F<sub>16</sub>N<sub>3</sub>O<sub>33</sub>S<sub>2</sub>Si 2478.6760; Found 2478.6760.

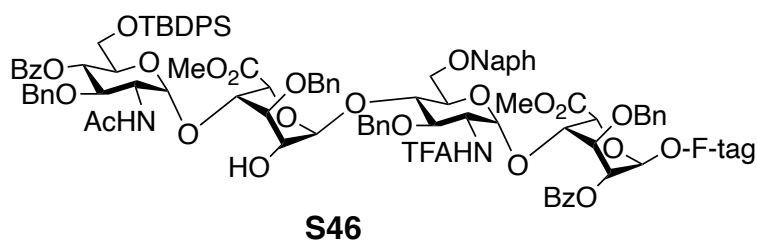

***N*-(Benzyl)-3,3,4,4,5,5,6,6,7,7,8,8,8-tridecafluorooctyl-benzoyloxycarbonyl-5-aminopentyl (2-acetamido-3-*O*-benzyl-4-*O*-benzoyl-2-deoxy-6-*O*-tert-butylidiphenylsilyl- $\alpha$ -D-glucopyranosyl)-(1→4)-(methyl 3-*O*-benzyl- $\alpha$ -L-idopyranosyluronate)-(1→4)-(3-*O*-benzyl-2-deoxy-6-*O*-2-naphthylmethyl-2-trifluoroacetamido- $\alpha$ -D-glucopyranosyl)-(1→4)-(methyl 3-*O*-benzyl-2-*O*-benzoyl- $\alpha$ -L-idopyranosyluronate (S46).**

Compound **S38** (0.10 g, 0.039 mmol) was treated according to the general procedure for Lev deprotection to give tetrasaccharide **S46** (90 mg, 94%);  $R_f$  0.44 (3:2 hexanes/acetone); <sup>1</sup>H NMR (400 MHz, CD<sub>3</sub>COCD<sub>3</sub>):  $\delta$  8.25 (d,  $J = 9.4$  Hz, 1H, NH), 8.06–7.85 (m, 7H, Ar), 7.68–7.76 (m, 2H, Ar), 7.70–7.05 (m, 47H, Ar), 5.67 (t,  $J = 9.6$  Hz, 1H,

H-4'''), 5.46 (d,  $J = 3.6$  Hz, 1H, H-1''), 5.28 (d,  $J = 3.5$  Hz, 1H), 5.24 (t,  $J = 4.2$  Hz, 1H), 5.20–5.12 (m, 4H), 4.94 (d,  $J = 11.5$  Hz, 1H), 4.90–4.80 (m, 6H), 4.79 (d,  $J = 11.5$  Hz, 1H), 4.71 (d,  $J = 11.5$  Hz, 1H), 4.64 (d,  $J = 11.0$  Hz, 1H), 4.52 (d,  $J = 11.0$  Hz, 1H), 4.47–4.39 (m, 5H), 4.35–4.07 (m, 7H), 3.99–3.86 (m, 5H), 3.82–3.72 (m, 3H), 3.72 (s, 3H, OCH<sub>3</sub>), 3.51–3.43 (m, 1H), 3.37 (s, 3H, OCH<sub>3</sub>), 3.18–3.10 (m, 2H, NCH<sub>2</sub>), 2.98–2.94 (m, 2H, PhCH<sub>2</sub>CH<sub>2</sub>), 2.61–2.47 (m, 2H), 1.77 (s, 3H, CH<sub>3</sub>C=O), 1.56–1.43 (m, 4H, 2 X CH<sub>2</sub>), 1.33–1.23 (m, 2H, CH<sub>2</sub>), 1.03 (s, 9H, (CH<sub>3</sub>)<sub>3</sub>C); <sup>13</sup>C NMR (100 MHz, CD<sub>3</sub>COCD<sub>3</sub>): δ 169.3, 169.3, 165.0, 164.7, 157.0 (q, <sup>2</sup>J<sub>C,F</sub> = 37.0 Hz, CF<sub>3</sub>C=O), 138.9, 138.8, 138.6, 138.4, 138.0, 136.4, 135.7, 135.5, 133.5, 133.4, 133.2, 133.1, 133.1, 133.0, 130.2, 129.8, 129.7, 129.6, 129.5, 128.8, 128.7, 128.5, 128.4, 128.4, 128.2, 128.0, 127.9, 127.9, 127.8, 127.8, 127.7, 127.6, 127.6, 127.5, 127.4, 127.2, 127.1, 126.8, 126.7, 126.2, 126.0, 125.9, 125.7, 116.0 (q, <sup>1</sup>J<sub>C,F</sub> = 287 Hz, CF<sub>3</sub>), 101.3, 99.1, 97.8, 97.3, 78.2, 77.8, 76.3, 76.1, 75.9, 74.3, 73.7, 73.3, 73.2, 72.9, 72.6, 72.4, 71.1, 70.3, 70.2, 69.8, 69.5, 68.9, 68.3, 68.2, 66.3, 62.2, 54.1, 53.7, 53.6, 52.3, 51.5, 51.2, 50.0, 49.8, 46.0, 32.2 (t, <sup>2</sup>J<sub>C,F</sub> = 21.6 Hz, CH<sub>2</sub>CF<sub>2</sub>), 26.2, 25.7 (t, <sup>3</sup>J<sub>C,F</sub> = 4.1 Hz, CH<sub>2</sub>CH<sub>2</sub>CF<sub>2</sub>), 23.1, 22.1; HRMS (ESI-TOF) m/z [M + Na]<sup>+</sup> calcd for C<sub>127</sub>H<sub>129</sub>F<sub>16</sub>N<sub>3</sub>NaO<sub>27</sub>Si 2482.8225; Found 2482.8225.

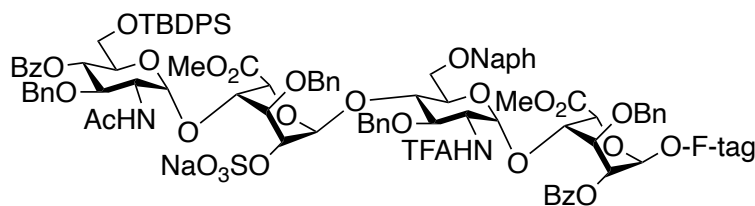

**S47**

***N*-(Benzyl)-3,3,4,4,5,5,6,6,7,7,8,8,8-tridecafluorooctyl-benzoyloxycarbonyl-5-aminopentyl (2-acetamido-3-*O*-benzyl-4-*O*-benzoyl-2-deoxy-6-*O*-tert-butylidiphenylsilyl- $\alpha$ -D-glucopyranosyl)-(1 $\rightarrow$ 4)-(methyl 3-*O*-benzyl-2-*O*-sulfonato- $\alpha$ -L-idopyranosyluronate)-(1 $\rightarrow$ 4)-(3-*O*-benzyl-2-deoxy-6-*O*-2-naphthylmethyl-2-trifluoroacetamido- $\alpha$ -D-glucopyranosyl)-(1 $\rightarrow$ 4)-(methyl 3-*O*-benzyl-2-*O*-benzoyl- $\alpha$ -L-idopyranosyluronate (S47).**

Compound **S46** (74 mg, 0.028 mmol) was treated according to the general procedure for Lev deprotection to give tetrasaccharide **S47** (70 mg, 93%);  $R_f$  0.44 (8:1 DCM/MeOH);  $^1\text{H}$  NMR (400 MHz,  $\text{CD}_3\text{OD}$ ):  $\delta$  9.11 (d,  $J = 9.2$  Hz, 1H, NH), 7.97–7.86 (m, 5H), 7.84–7.72 (m, 4H), 7.65–7.57 (m, 4H), 7.54–6.95 (m, 43H), 5.55 (s, 1H, H-1'''), 5.47 (t,  $J = 9.7$  Hz, 1H, H-4'''), 5.18 (d,  $J = 3.5$  Hz, 1H), 5.14–5.08 (m, 4H), 4.99 (d,  $J = 1.6$  Hz, 1H), 4.95–4.84 (m, 4H), 4.79 (d,  $J = 12.0$  Hz, 1H), 4.70–4.52 (m, 6H), 4.46 (d,  $J = 11.1$  Hz, 1H), 4.41–4.35 (m, 4H), 4.29–4.23 (m, 3H), 4.18–4.06 (m, 3H), 4.01 (s, 1H), 3.92–3.61 (m, 11H), 3.49–3.40 (m, 1H), 3.14–3.04 (m, 2H,  $\text{NCH}_2$ ), 2.96 (s, 3H), 2.91–2.87 (m, 2H,  $\text{PhCH}_2\text{CH}_2$ ), 2.48–2.35 (m, 2H), 2.03 (s, 3H,  $\text{CH}_3\text{C}=\text{O}$ ), 1.56–1.43 (m, 4H), 1.33–1.23 (m, 2H), 0.96 (s, 9H,  $(\text{CH}_3)_3\text{C}$ );  $^{13}\text{C}$  NMR (100 MHz,  $\text{CD}_3\text{OD}$ ): 170.3, 169.8, 165.7, 165.2, 163.5, 157.8 (q,  $^2J_{\text{C},\text{F}} = 36.8$  Hz,  $\text{CF}_3\text{C}=\text{O}$ ), 138.1, 137.8, 137.5, 137.3, 135.8, 135.5, 135.3, 133.5, 133.2, 133.1, 133.0, 132.9, 132.8, 129.8, 129.4, 129.3, 129.3, 128.4, 128.3, 128.2, 128.1, 128.1, 127.9, 127.8, 127.8, 127.7, 127.6, 127.4, 127.4, 127.3, 127.2, 127.0, 126.6, 126.4, 126.0, 125.9, 125.6, 125.4, 115.8 (q,  $^1J_{\text{C},\text{F}} = 288.0$  Hz,  $\text{CF}_3$ ), 98.8, 97.3, 95.3, 78.0, 77.9, 74.6, 73.9, 73.5, 72.8, 72.6, 72.2, 72.1, 72.1, 71.7, 71.4, 71.2, 70.6, 70.1, 69.3, 68.5, 67.8, 66.6, 62.2, 53.5, 53.3, 51.9, 51.0, 50.1, 49.9, 32.2 (t,  $^2J_{\text{C},\text{F}} = 21.6$  Hz,  $\text{CH}_2\text{CF}_2$ ), 28.6, 25.9, 25.7 (t,  $^3J_{\text{C},\text{F}} = 5.0$  Hz,  $\text{CH}_2\text{CH}_2\text{CF}_2$ ), 22.9, 21.9, 18.6; HRMS (ESI-TOF)  $m/z$   $[\text{M} - \text{Na}]^{-1}$  calcd for  $\text{C}_{127}\text{H}_{128}\text{F}_{16}\text{N}_3\text{O}_{30}\text{SSi}$  2538.7817; Found 2538.7839.

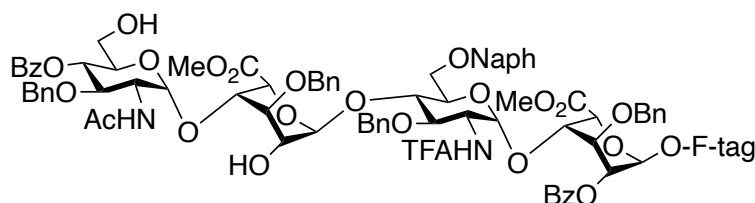

**S48**

***N*-(Benzyl)-3,3,4,4,5,5,6,6,7,7,8,8,8-tridecafluorooctyl-benzoyloxycarbonyl-5-aminopentyl (2-acetamido-3-*O*-benzyl-4-*O*-benzoyl-2-deoxy- $\alpha$ -D-glucopyranosyl)-(1 $\rightarrow$ 4)-(methyl 3-*O*-benzyl- $\alpha$ -L-idopyranosyluronate)-(1 $\rightarrow$ 4)-(3-*O*-benzyl-2-deoxy-6-**

**O-2-naphthylmethyl-2-trifluoroacetamido- $\alpha$ -D-glucopyranosyl)-(1 $\rightarrow$ 4)-(methyl 3-O-benzyl-2-O-benzoyl- $\alpha$ -L-idopyranosyluronate (S48).**

Compound **S46** (80 mg, 0.039 mmol) was treated according to the general procedure for Lev deprotection to give tetrasaccharide **S48** (68 mg, 94%);  $R_f$  0.20 (3:2 hexanes/acetone);  $^1\text{H}$  NMR (400 MHz,  $\text{CD}_3\text{COCD}_3$ ):  $\delta$  8.31 (d,  $J = 9.2$  Hz, 1H, NH), 8.06–7.85 (m, 7H, Ar), 7.79–7.74 (m, 3H, Ar), 7.67–7.05 (m, 36H, Ar), 5.50 (d,  $J = 3.9$  Hz, 1H, H-1"), 5.32 (t,  $J = 9.8$  Hz, 1H, H-4""), 5.28 (d,  $J = 3.5$  Hz, 1H), 5.24 (t,  $J = 4.0$  Hz, 1H), 5.19 (d,  $J = 3.5$  Hz, 1H), 5.14–5.11 (m, 3H), 4.95–4.78 (m, 8H), 4.72 (d,  $J = 11.5$  Hz, 1H), 4.61 (d,  $J = 11.2$  Hz, 1H), 4.52 (d,  $J = 11.2$  Hz, 1H), 4.47 (s, 2H), 4.43–4.15 (m, 8H), 4.06 (t,  $J = 5.0$  Hz, 1H), 3.98–3.88 (m, 4H), 3.79–3.72 (m, 4H), 3.66–3.62 (m, 2H), 3.52 (s, 3H,  $\text{OCH}_3$ ), 3.51–3.43 (m, 1H), 3.18–3.10 (m, 2H,  $\text{NCH}_2$ ), 2.98–2.93 (m, 2H,  $\text{PhCH}_2\text{CH}_2$ ), 2.61–2.47 (m, 2H), 1.75 (s, 3H,  $\text{CH}_3\text{C}=\text{O}$ ), 1.56–1.43 (m, 4H), 1.33–1.23 (m, 2H);  $^{13}\text{C}$  NMR (100 MHz,  $\text{CD}_3\text{COCD}_3$ ):  $\delta$  134.4, 133.4, 130.4, 129.7, 128.8, 128.3, 128.0, 127.9, 127.8, 127.7, 127.6, 127.1, 126.2, 126.0, 125.9, 101.4, 99.1, 97.8, 97.4, 77.9, 76.4, 76.3, 76.3, 74.6, 73.7, 73.4, 73.1, 72.6, 71.5, 71.0, 70.3, 70.2, 69.7, 68.9, 68.3, 68.2, 66.3, 61.1, 53.7, 52.2, 51.5, 51.3, 50.0, 46.2, 32.2, 29.1, 27.6, 25.7, 23.1, 22.1; HRMS (ESI-TOF)  $m/z$   $[\text{M} + \text{H}]^+1$  calcd for  $\text{C}_{111}\text{H}_{112}\text{F}_{16}\text{N}_3\text{O}_{27}$  2222.7227; Found 2222.7212.

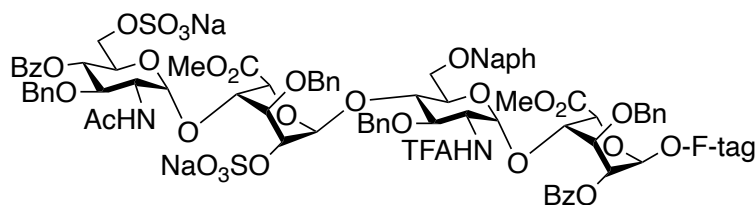

**S49**

**N-(Benzyl)-3,3,4,4,5,5,6,6,7,7,8,8,8-tridecafluorooctyl-benzoyloxycarbonyl-5-aminopentyl (2-acetamido-3-O-benzyl-4-O-benzoyl-2-deoxy-6-O-sulfonato- $\alpha$ -D-glucopyranosyl)-(1 $\rightarrow$ 4)-(methyl 3-O-benzyl-2-O-sulfonato- $\alpha$ -L-idopyranosyluronate)-(1 $\rightarrow$ 4)-(3-O-benzyl-2-deoxy-6-O-2-naphthylmethyl-2-**

**trifluoroacetamido- $\alpha$ -D-glucopyranosyl)-(1 $\rightarrow$ 4)-(methyl 3-O-benzyl-2-O-benzoyl- $\alpha$ -L-idopyranosyluronate (S49).**

Compound **S48** (60 mg, 0.026 mmol) was treated according to the general procedure for O-sulfation to give tetrasaccharide **S49** (59 mg, 91%);  $R_f$  0.32 (6:1 DCM/MeOH);  $^1\text{H}$  NMR (400 MHz,  $\text{CD}_3\text{COCD}_3$ ):  $\delta$  8.53 (d,  $J$  = 8.5 Hz, 1H, NH), 8.00–7.96 (m, 5H), 7.86–7.73 (m, 4H), 7.66–7.64 (m, 1H), 7.67–7.05 (m, 36H, Ar), 5.62 (s, 1H), 5.30 (d,  $J$  = 3.6 Hz, 1H), 5.27–5.21 (m, 3H), 5.12 (s, 2H), 4.99 (d,  $J$  = 12.4 Hz, 1H), 4.95–4.85 (m, 5H), 4.84–4.67 (m, 6H), 4.54 (d,  $J$  = 11.5 Hz, 1H), 4.49 (d,  $J$  = 11.0 Hz, 1H), 4.45 (s, 2H), 4.42–4.33 (m, 2H), 4.30–4.26 (m, 2H), 4.24–4.13 (m, 4H), 4.10 (s, 1H), 4.07–3.91 (m, 5H), 3.89–3.71 (m, 5H), 3.48–3.43 (m, 1H), 3.41 (s, 3H,  $\text{OCH}_3$ ), 3.14–3.05 (m, 2H,  $\text{NCH}_2$ ), 2.98–2.93 (m, 2H,  $\text{PhCH}_2\text{CH}_2$ ), 2.61–2.47 (m, 2H), 2.00 (s, 3H,  $\text{CH}_3\text{C}=\text{O}$ ), 1.56–1.43 (m, 4H), 1.33–1.23 (m, 2H);  $^{13}\text{C}$  NMR (100 MHz,  $\text{CD}_3\text{COCD}_3$ ):  $\delta$  134.3, 133.3, 130.4, 129.7, 128.5, 128.4, 128.2, 128.1, 127.8, 127.7, 127.6, 126.7, 126.5, 126.3, 125.7, 99.0, 98.9, 98.8, 97.0, 77.8, 77.4, 76.6, 74.5, 74.3, 73.8, 73.1, 73.0, 72.8, 72.7, 72.6, 71.9, 71.6, 70.3, 70.1, 69.4, 68.5, 68.3, 67.1, 66.3, 65.2, 53.7, 53.3, 51.7, 51.6, 49.9, 46.3, 32.3, 28.8, 27.4, 25.7, 23.0, 22.4; HRMS (ESI-TOF)  $m/z$   $[\text{M} - 2\text{Na} + \text{H}]^{-1}$  calcd for  $\text{C}_{111}\text{H}_{110}\text{F}_{16}\text{N}_3\text{O}_{33}\text{S}_2$  2380.6208; Found 2380.6416.

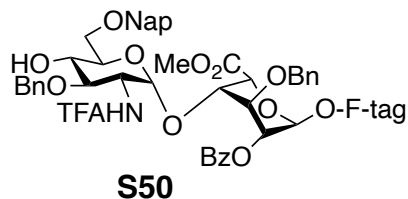

***N*-(Benzyl)-3,3,4,4,5,5,6,6,7,7,8,8,8-tridecafluorooctyl-benzoyloxycarbonyl-5-aminopentyl (3-O-benzyl-2-deoxy-6-O-2-naphthylmethyl-2-trifluoroacetamido- $\alpha$ -D-glucopyranosyl)-(1 $\rightarrow$ 4)-methyl-2-O-benzoyl-3-O-benzyl- $\alpha$ -L-idopyranosyluronate (S50).**

To a suspension of compound **70** (1.4 g, 0.93 mmol) in DCM (40 mL) were added triethylsilane (2.5 mL, 15 mmol) and trifluoroacetic anhydride (0.25 g, 1.2 mmol) at 0 °C.

After 10 min, trifluoroacetic acid (0.48 g, 4.2 mmol) was added and the reaction was stirred at RT for 1 h. The reaction was quenched with saturated aq. NaHCO<sub>3</sub>, and the organic layer was washed with brine, dried over Na<sub>2</sub>SO<sub>4</sub>, and concentrated. The residue was purified by silica gel column chromatography (elution with 3:1 → 2:1 hexanes/EtOAc) afforded compound **S50** (1.2 g, 82%) as a colorless foam. *R*<sub>f</sub> 0.52 (4:3 hexanes/EtOAc); <sup>1</sup>H NMR (400 MHz, CD<sub>3</sub>COCD<sub>3</sub>): δ 8.45 (d, *J* = 9 Hz, 1H, NH), 8.12–8.10 (m, 2H, Ar), 7.95–7.90 (m, 4H, Ar), 7.68–7.63 (m, 1H, Ar), 7.60–7.50 (m, 5H, Ar), 7.40–7.19 (m, 19H, Ar), 5.31 (d, *J* = 3.6 Hz, 1H, H-1'), 5.28 (dd, *J* = 4.9, 4.2 Hz, 1H, H-2), 5.24 (d, *J* = 3.4 Hz, 1H, H-1), 5.17 (s, 2H, NCO<sub>2</sub>CH<sub>2</sub>), 5.04 (d, *J* = 4.2 Hz, 1H, OH), 4.97 (d, *J* = 3.8 Hz, 1H, H-5), 4.92 (d, *J* = 11.3 Hz, 1H, 3'-OCH<sub>2</sub>Ph), 4.86 (d, *J* = 12.5 Hz, 1H, NapCH<sub>2</sub>), 4.83 (d, *J* = 12.5 Hz, 1H, 3-OCH<sub>2</sub>Ph), 4.82 (d, *J* = 12.5 Hz, 1H, NapCH<sub>2</sub>), 4.78 (d, *J* = 12.5 Hz, 1H, 3-OCH<sub>2</sub>Ph), 4.59 (d, *J* = 11.3 Hz, 1H, 3'-OCH<sub>2</sub>Ph), 4.50 (s, 2H, NCH<sub>2</sub>Ph), 4.47 (dd, *J* = 5.3, 4.1 Hz, 1H, H-4), 4.34 (t, *J* = 5.3 Hz, 1H, H-3), 4.01–3.89 (m, 4H, H-3', H-4', H-6'), 3.82 (s, 3H, OCH<sub>3</sub>), 3.82–3.73 (m, 1H, OCH<sub>2</sub>CH<sub>2</sub>), 3.54–3.46 (m, 1H, OCH<sub>2</sub>CH<sub>2</sub>), 3.19–3.15 (m, 2H, NCH<sub>2</sub>), 3.01–2.97 (m, 2H, PhCH<sub>2</sub>CH<sub>2</sub>), 2.56–2.51 (m, 2H, PhCH<sub>2</sub>CH<sub>2</sub>), 1.58–1.46 (m, 4H, 2 X CH<sub>2</sub>), 1.35–1.24 (m, 2H, CH<sub>2</sub>); <sup>13</sup>C NMR (100 MHz, CD<sub>3</sub>COCD<sub>3</sub>): δ 169.4 (C=OOCH<sub>3</sub>), 165.0 (C=OPh), 157.0 (q, <sup>2</sup>*J*<sub>C,F</sub> = 36.9 Hz, CF<sub>3</sub>C=O), 156.2 (NCO<sub>2</sub>), 139.2 (Ar), 138.9 (Ar), 138.6 (Ar), 138.0 (Ar), 136.6 (Ar), 133.5 (Ar), 133.0 (Ar), 129.9 (Ar), 129.7 (Ar), 128.8 (Ar), 128.5 (Ar), 128.4 (Ar), 128.2 (Ar), 128.1 (Ar), 127.94 (Ar), 127.91 (Ar), 127.86 (Ar), 127.6 (Ar), 127.5 (Ar), 127.4 (Ar), 127.13 (Ar), 127.09 (Ar), 126.0 (Ar), 125.9 (Ar), 125.7 (Ar), 116.0 (q, <sup>1</sup>*J*<sub>C,F</sub> = 286.0 Hz, CF<sub>3</sub>), 99.0 (C-1), 97.8 (C-1'), 79.2 (C-3'), 76.4 (C-3), 74.2 (3'-OCH<sub>2</sub>Ph), 74.0 (C-4), 73.2 (NapCH<sub>2</sub>), 72.8 (C-5'), 72.7 (3-OCH<sub>2</sub>Ph), 71.3 (C-4'), 70.6 (C-2), 69.3 (C-5, C-6'), 68.3 (OCH<sub>2</sub>CH<sub>2</sub>), 66.3 (NCO<sub>2</sub>CH<sub>2</sub>Ph), 53.6 (C-2'), 51.5 (OCH<sub>3</sub>), 50.0, 49.8 (NCH<sub>2</sub>Ph), 46.8, 46.0 (NCH<sub>2</sub>CH<sub>2</sub>), 32.1 (t, <sup>2</sup>*J*<sub>C,F</sub> = 21.7 Hz, CH<sub>2</sub>CF<sub>2</sub>), 29.0 (CH<sub>2</sub>), 27.7 (CH<sub>2</sub>), 25.7 (t, <sup>3</sup>*J*<sub>C,F</sub> = 4.2 Hz, CH<sub>2</sub>CH<sub>2</sub>CF<sub>2</sub>), 23.1 (CH<sub>2</sub>); HRMS (ESI-TOF) *m/z* [M + H]<sup>+</sup> calcd for C<sub>75</sub>H<sub>73</sub>F<sub>16</sub>N<sub>2</sub>O<sub>15</sub> 1545.4756; Found 1545.4767.



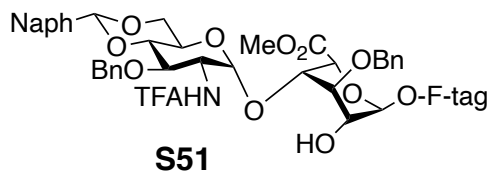

***N*-(Benzyl)-3,3,4,4,5,5,6,6,7,7,8,8,8-tridecafluorooctyl-benzylloxycarbonyl-5-aminopentyl (3-*O*-benzyl-2-deoxy-4,6-*O*-2-naphthylidene-2-trifluoroacetamido- $\alpha$ -D-glucopyranosyl)-(1 $\rightarrow$ 4)-(methyl 3-*O*-benzyl- $\alpha$ -L-idopyranosyluronate (**S51**)).**

To a solution of disaccharide **70** (0.20 g, 0.13 mmol) in anhydrous DCM (10 mL) was added the solution of NaOMe in MeOH (0.05 M, 5.0 mL) at RT. After stirring for 6 h, the reaction was quenched with saturated aq. NH<sub>4</sub>Cl. The organic layer was washed with brine, dried over Na<sub>2</sub>SO<sub>4</sub>, and concentrated under reduced pressure. Purification by silica gel column chromatography (elution with 4:1  $\rightarrow$  2:1 hexanes/EtOAc) afforded compound **S51** (0.17 g, 91%) as a colorless foam. *R*<sub>f</sub> 0.59 (4:3 hexanes/EtOAc); <sup>1</sup>H NMR (400 MHz, CD<sub>3</sub>COCD<sub>3</sub>):  $\delta$  8.58 (d, *J* = 9.0 Hz, 1H, NH), 8.04 (s, 1H), 7.97–7.92 (m, 3H, Ar), 7.67–7.64 (m, 1H, Ar), 7.56–7.53 (m, 2H, Ar), 7.40–7.22 (m, 19H, Ar), 5.90 (s, 1H, NapCH), 5.28 (d, *J* = 3.7 Hz, 1H, H-1'), 5.14–5.12 (m, 2H, NCO<sub>2</sub>CH<sub>2</sub>), 4.93 (s, 1H, H-1), 4.91 (d, *J* = 11.7 Hz, 1H, CH<sub>2</sub>Ph), 4.87 (d, *J* = 1.2 Hz, 1H, H-5), 4.78 (d, *J* = 11.4 Hz, 1H, CH<sub>2</sub>Ph), 4.75 (br, 1H, OH), 4.68 (d, *J* = 11.7 Hz, 1H, CH<sub>2</sub>Ph), 4.65 (d, *J* = 11.4 Hz, 1H, CH<sub>2</sub>Ph), 4.51 (s, 2H, NCH<sub>2</sub>Ph), 4.36–4.30 (m, 2H, H-2', H-6'), 4.23 (t, 1H, *J* = 2.0 Hz, H-4), 3.99 (t, 1H, *J* = 2.5 Hz, H-4), 4.19 (t, *J* = 5.8 Hz, 1H, H-3), 3.97–3.89 (m, 4H, H-2', H-3', H-4', H-6'), 3.84 (s, 3H, OCH<sub>3</sub>), 3.84–3.79 (m, 1H, H-5'), 3.72 (br, 1H, OCH<sub>2</sub>CH<sub>2</sub>), 3.44 (br, 1H, OCH<sub>2</sub>CH<sub>2</sub>), 3.26–3.19 (m, 2H, NCH<sub>2</sub>), 2.98–2.94 (m, 2H, PhCH<sub>2</sub>CH<sub>2</sub>), 2.62–2.48 (m, 2H, PhCH<sub>2</sub>CH<sub>2</sub>), 1.56–1.48 (m, 4H, 2 X CH<sub>2</sub>), 1.35–1.27 (m, 2H, CH<sub>2</sub>); <sup>13</sup>C NMR (100 MHz, CD<sub>3</sub>COCD<sub>3</sub>):  $\delta$  169.7 (C=OOCH<sub>3</sub>), 157.1 (q, <sup>2</sup>*J*<sub>C,F</sub> = 36.8 Hz, CF<sub>3</sub>C=O), 155.7 (NCO<sub>2</sub>), 139.0 (Ar), 138.9 (Ar), 138.6 (Ar), 138.5 (Ar), 135.5 (Ar), 133.7 (Ar), 133.0 (Ar), 128.5 (Ar), 128.4 (Ar), 128.3 (Ar), 128.2 (Ar), 128.0 (Ar), 127.8 (Ar), 127.7 (Ar), 127.50 (Ar), 127.48 (Ar), 127.21 (Ar), 127.16 (Ar), 126.4 (Ar), 126.2 (Ar), 125.5 (Ar), 124.0 (Ar), 116.1 (q, <sup>1</sup>*J*<sub>C,F</sub> = 287.3 Hz, CF<sub>3</sub>), 101.3 (NapCH), 101.2 (C-1), 96.3 (C-1'), 82.3 (C-4'), 76.8 (C-3'), 74.1

(CH<sub>2</sub>Ph), 73.7 (C-3), 72.8 (C-4), 71.5 (OCH<sub>2</sub>Ph), 68.3 (C-6'), 67.9 (OCH<sub>2</sub>CH<sub>2</sub>), 67.1 (C-5), 66.3 (NCO<sub>2</sub>CH<sub>2</sub>Ph), 66.2 (C-2), 63.6 (C-5'), 53.3 (C-2'), 51.6 (OCH<sub>3</sub>), 50.0 and 49.8 (NCH<sub>2</sub>Ph), 46.9 and 46.1 (NCH<sub>2</sub>CH<sub>2</sub>), 32.1 (t, <sup>2</sup>J<sub>C,F</sub> = 21.2 Hz, CH<sub>2</sub>CF<sub>2</sub>), 29.0 (CH<sub>2</sub>), 27.8 (CH<sub>2</sub>), 25.7 (t, <sup>3</sup>J<sub>C,F</sub> = 4.2 Hz, CH<sub>2</sub>CH<sub>2</sub>CF<sub>2</sub>), 23.3 (CH<sub>2</sub>); HRMS (ESI-TOF) m/z [M + Na]<sup>+</sup> calcd for C<sub>68</sub>H<sub>66</sub>F<sub>16</sub>N<sub>2</sub>O<sub>14</sub>Na 1461.4175; Found 1461.4175.

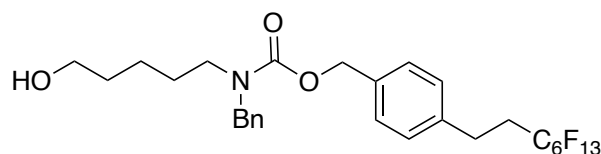

**S56**

**(4-(8,8,8,8,8,8,8,8,8,8,8,8,8,8-tridecafluoro-8λ<sup>16</sup>-octa-3,5,7-triyn-1-yl)phenyl)methyl benzyl(5-hydroxypentyl)carbamate (S56)**

A solution of **S52** (5.2 g, 11 mmol) in acetonitrile (200 mL) was treated at RT with triethylamine (3.3 g, 33 mmol) and cooled to 0 °C. At 0 °C, *N,N'*-disuccinimidyl carbonate (DSC) (5.9 g, 22 mmol) was added. The reaction mixture was stirred at RT for 2 h and then concentrated *in vacuo*. The residue was purified by silica gel column chromatography (elution with 3:1 → 2:1 hexanes/EtOAc) to afford compound **S54** (5.8 g, 85%). A solution of compound **S54** (5.8 g, 9.7 mmol) in CH<sub>2</sub>Cl<sub>2</sub> (100 mL) was added and triethylamine (3.3 g, 33 mmol) and 5-benzylamino-1-pentanol (2.9 g, 15 mmol) at 0 °C. The solution was stirred for 1 h at RT, and then concentrated *in vacuo*. The residue was purified by silica gel column chromatography (elution with 2:1 → 1:1 hexanes/EtOAc) to afford compound **S56** (6.4 g, 96%). *R*<sub>f</sub> 0.35 (4:3 hexanes/EtOAc); <sup>1</sup>H NMR (400 MHz, CD<sub>3</sub>CN): δ 7.36–7.24 (m, 9H, Ar), 5.12 (s, 2H, OCH<sub>2</sub>Ph), 4.49 (s, 2H, NCH<sub>2</sub>Ph), 3.44 (br, 2H, CH<sub>2</sub>OH), 3.24 (br, 2H, NCH<sub>2</sub>CH<sub>2</sub>), 2.96–2.92 (m, 2H, CH<sub>2</sub>CH<sub>2</sub>C<sub>6</sub>F<sub>13</sub>), 2.57–2.45 (m, 3H, OH, CH<sub>2</sub>CH<sub>2</sub>C<sub>6</sub>F<sub>13</sub>), 1.56–1.42 (m, 4H, 2 X CH<sub>2</sub>), 1.31–1.24 (m, 2H, CH<sub>2</sub>); <sup>13</sup>C NMR (100 MHz, CD<sub>3</sub>CN): δ 138.8 (Ar), 138.3 (Ar), 135.4 (Ar), 128.2 (Ar), 128.1 (Ar), 127.7 (Ar), 126.8 (Ar), 66.0 (OCH<sub>2</sub>Ph), 61.0 (CH<sub>2</sub>OH), 49.8 (C=ONCH<sub>2</sub>Ph atropisomer 1), 49.5 (C=ONCH<sub>2</sub>Ph atropisomer 2), 46.8 (C=ONCH<sub>2</sub>CH<sub>2</sub> atropisomer 1), 46.1, (C=ONCH<sub>2</sub>CH<sub>2</sub>



**trifluoroacetamido- $\alpha$ -D-glucoopyranosyl)-(1 $\rightarrow$ 4)-methyl-2-O-benzoyl-3-O-benzyl- $\alpha$ -L-idopyranosyluronate (S58).**

A mixture of donor **69** (0.40 g, 0.41 mmol), the F-tag linker **S57** (0.79 g, 1.0 mmol), and powdered 4 Å molecular sieves was suspended in anhydrous DCM (30 mL) and stirred at RT. After 30 min, NIS (0.18 g, 0.82 mmol) was added, and the mixture was cooled to –50 °C for 10 min. TfOH (70  $\mu$ L, 0.79 mmol) was then added via syringe and the solution was slowly warmed up to –20 °C. Et<sub>3</sub>N (100  $\mu$ L) was added to quench the reaction, and the mixture was filtered. The filtrate was concentrated, and the resulting residue was purified by silica gel column chromatography (elution with 5:1  $\rightarrow$  4:1 hexanes/EtOAc) to afford compound **S58** (0.46 g, 69%) as a colorless foam. *R<sub>f</sub>* 0.73 (4:3 hexanes/EtOAc); <sup>1</sup>H NMR (500 MHz, CDCl<sub>3</sub>):  $\delta$  8.08–7.89 (m, 6H, Ar), 7.64–7.62 (m, 1H, Ar), 7.55–7.53 (m, 2H, Ar), 7.38–6.98 (m, 22H, Ar), 6.19 (d, *J* = 7.8 Hz, 1H, NH), 5.73 (s, 1H, NapCH), 5.20–5.01 (m, 5H, NCO<sub>2</sub>CH<sub>2</sub>, H-2, H-1', H-1), 4.87–4.82 (m, 2H, H-5, CH<sub>2</sub>Ph), 4.64–4.61 (m, 2H, CH<sub>2</sub>Ph), 4.50–4.46 (m, 3H, H-6', NCH<sub>2</sub>Ph), 4.15–4.03 (m, 4H, CH<sub>2</sub>Ph, H-5', H-4, H-2'), 3.93 (t, *J* = 3.2 Hz, 1H, H-3), 3.78 (s, 3H, OCH<sub>3</sub>), 3.78–3.74 (m, 3H, OCH<sub>2</sub>CH<sub>2</sub>, H-4', H-6'), 3.52 (t, *J* = 9.5 Hz, 1H, H-3'), 3.50–3.44 (m, 1H, OCH<sub>2</sub>CH<sub>2</sub>), 3.24–3.13 (m, 2H, NCH<sub>2</sub>), 2.93–2.90 (m, 2H, PhCH<sub>2</sub>CH<sub>2</sub>), 2.42–2.31 (m, 2H, PhCH<sub>2</sub>CH<sub>2</sub>), 1.66–1.51 (m, 4H, 2 X CH<sub>2</sub>), 1.34–1.25 (m, 2H, CH<sub>2</sub>); <sup>13</sup>C NMR (125 MHz, CDCl<sub>3</sub>):  $\delta$  169.3 (C=OOCH<sub>3</sub>), 165.4 (C=OPh), 157.0 (q, <sup>2</sup>*J*<sub>C,F</sub> = 37.3 Hz, CF<sub>3</sub>C=O), 138.4 (Ar), 137.7 (Ar), 137.1 (Ar), 134.8 (Ar), 133.7 (Ar), 132.9 (Ar), 129.7 (Ar), 129.3 (Ar), 128.5 (Ar), 128.43 (Ar), 128.38 (Ar), 128.3 (Ar), 128.1 (Ar), 128.0 (Ar), 127.8 (Ar), 127.7 (Ar), 127.3 (Ar), 126.5 (Ar), 126.3 (Ar), 125.7 (Ar), 123.7 (Ar), 115.4 (q, <sup>1</sup>*J*<sub>C,F</sub> = 285.3 Hz, CF<sub>3</sub>), 101.6 (NapCH), 99.2 (C-1), 98.7 (C-1'), 82.3 (C-4'), 76.0 (C-3'), 75.8 (C-4), 74.3 (OCH<sub>2</sub>Ph), 74.1 (C-3), 72.5 (OCH<sub>2</sub>Ph), 68.7 (OCH<sub>2</sub>CH<sub>2</sub>), 68.5 (C-6'), 68.4 (C-2), 67.4 (C-5), 66.8 (NCO<sub>2</sub>CH<sub>2</sub>Ph), 63.7 (C-5'), 53.5 (C-2'), 52.2 (OCH<sub>3</sub>), 50.5, 50.3 (NCH<sub>2</sub>Ph), 47.2, 46.1 (NCH<sub>2</sub>CH<sub>2</sub>), 32.9 (t, <sup>2</sup>*J*<sub>C,F</sub> = 22.4 Hz, CH<sub>2</sub>C<sub>6</sub>F<sub>13</sub>), 29.1 (CH<sub>2</sub>), 27.5 (CH<sub>2</sub>), 26.2 (t, <sup>3</sup>*J*<sub>C,F</sub> = 4.3 Hz, CH<sub>2</sub>CH<sub>2</sub>CF<sub>2</sub>), 23.4

(CH<sub>2</sub>); HRMS (ESI-TOF) *m/z* [M + H]<sup>+</sup> calcd for C<sub>77</sub>H<sub>71</sub>F<sub>20</sub>N<sub>2</sub>O<sub>15</sub> 1643.4535; Found 1643.4523.

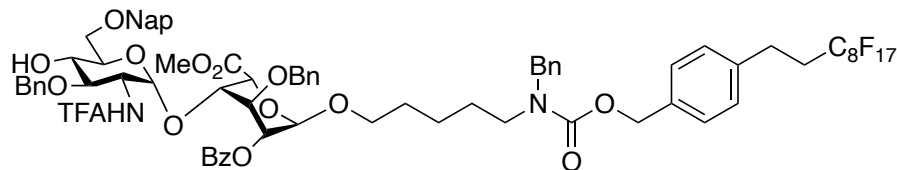

**S59**

***N*-(Benzyl)-3,3,4,4,5,5,6,6,7,7,8,8,9,9,10,10,10-heptadecafluorooctylbenzyloxycarbonyl-5-aminopentyl (3-*O*-benzyl-2-deoxy-6-*O*-2-naphthylmethyl-2-trifluoroacetamido- $\alpha$ -D-glucopyranosyl)-(1 $\rightarrow$ 4)-(methyl 3-*O*-benzyl-2-*O*-((9*H*-fluoren-9-yl)methoxycarbonyl))- $\alpha$ -L-idopyranosyluronate (S59).**

To a suspension of compound **S58** (0.46 g, 0.27 mmol) in DCM (15 mL) were added triethylsilane (1.2 mL, 8.0 mmol) and trifluoroacetic anhydride (0.13 g, 0.60 mmol) at 0 °C. After 10 min, trifluoroacetic acid (0.24 g, 2.1 mmol) was added dropwise. The reaction was stirred at RT for 1 h and then quenched with saturated aq. NaHCO<sub>3</sub>. The resulting mixture was filtered, diluted with DCM (20 mL), and the organic layer was washed with brine, dried over Na<sub>2</sub>SO<sub>4</sub>, concentrated and purified by silica gel column chromatography (elution with 3:1  $\rightarrow$  2:1 hexanes/EtOAc) to afford compound **S59** (0.37 g, 81%) as a colorless foam. *R<sub>f</sub>* 0.47 (4:3 hexanes/EtOAc); <sup>1</sup>H NMR (400 MHz, CDCl<sub>3</sub>):  $\delta$  8.05–8.03 (m, 2H, Ar), 7.86–7.80 (m, 4H, Ar), 7.54–7.41 (m, 6H, Ar), 7.34–7.09 (m, 19H, Ar), 6.34 (br, 1H, NH), 5.19 (t, *J* = 2.7 Hz, 1H, H-2), 5.17–5.14 (m, 2H, NCO<sub>2</sub>CH<sub>2</sub>), 5.10 (s, 1H, H-1), 5.05 (d, *J* = 2.1 Hz, 1H, H-1'), 4.85 (d, *J* = 4.4 Hz, 1H, H-5), 4.80–4.73 (m, 3H, CH<sub>2</sub>Ph, NapCH<sub>2</sub>), 4.60 (d, *J* = 11.5 Hz, 1H, OCH<sub>2</sub>Ph), 4.53 (d, *J* = 11.5 Hz, 1H, OCH<sub>2</sub>Ph), 4.48–4.46 (m, 2H, NCH<sub>2</sub>Ph), 4.23 (d, *J* = 11.5 Hz, 1H, OCH<sub>2</sub>Ph), 4.17–4.07 (m, 2H, H-4, H-2'), 3.94 (t, *J* = 3.7 Hz, 1H, H-3), 3.91–3.82 (m, 3H, H-4', H-5', H-6'), 3.78–3.72 (m, 2H, OCH<sub>2</sub>CH<sub>2</sub>, H-6'), 3.71 (s, 3H, OCH<sub>3</sub>), 3.50–3.45 (m, 1H, OCH<sub>2</sub>CH<sub>2</sub>), 3.42 (dd, *J* = 10.5, 8.5 Hz, 1H, H-3'), 3.24–3.13 (m, 2H, NCH<sub>2</sub>), 2.94–2.90 (m, 2H, PhCH<sub>2</sub>CH<sub>2</sub>), 2.78 (br, 1H,

OH), 2.45–2.31 (m, 2H, PhCH<sub>2</sub>CH<sub>2</sub>), 1.66–1.51 (m, 4H, 2 X CH<sub>2</sub>), 1.34–1.25 (m, 2H, CH<sub>2</sub>); <sup>13</sup>C NMR (100 MHz, CDCl<sub>3</sub>): δ 133.8 (Ar), 129.6 (Ar), 128.9 (Ar), 128.4 (Ar), 128.1 (Ar), 127.6 (Ar), 126.8 (Ar), 126.2 (Ar), 99.1 (C-1), 97.7 (C-1'), 78.9 (C-3'), 74.7 (C-4), 74.3 (OCH<sub>2</sub>Ph), 74.0 (NapCH<sub>2</sub>, C-3), 72.5 (OCH<sub>2</sub>Ph), 72.3 (C-4), 70.8 (C-5'), 69.8 (C-6'), 68.8 (C-2, OCH<sub>2</sub>CH<sub>2</sub>), 67.8 (C-5), 66.8 (NCO<sub>2</sub>CH<sub>2</sub>Ph), 52.9 (C-2'), 52.2 (OCH<sub>3</sub>), 50.3 (NCH<sub>2</sub>Ph), 47.2, 46.1 (NCH<sub>2</sub>CH<sub>2</sub>), 32.9 (CH<sub>2</sub>C<sub>6</sub>F<sub>13</sub>), 29.1 (CH<sub>2</sub>), 27.5 (CH<sub>2</sub>), 26.2 (CH<sub>2</sub>CH<sub>2</sub>CF<sub>2</sub>), 23.4 (CH<sub>2</sub>); HRMS (ESI-TOF) m/z [M + H]<sup>+</sup> calcd for C<sub>77</sub>H<sub>73</sub>F<sub>20</sub>N<sub>2</sub>O<sub>15</sub> 1645.4692; Found 1645.4678.

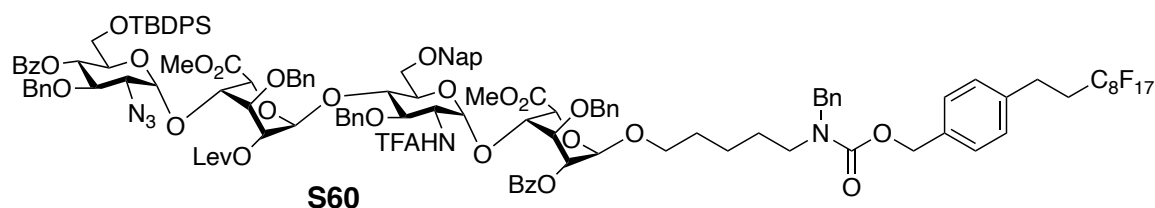

***N*-(Benzyl)-3,3,4,4,5,5,6,6,7,7,8,8,9,9,10,10,10-heptafluorooctyl-benzyloxycarbonyl-5-aminopentyl (2-azido-3-*O*-benzyl-4-*O*-benzoyl-2-deoxy-6-*O*-*tert*-butyldiphenylsilyl- $\alpha$ -D-glucopyranosyl)-(1→4)-(methyl 3-*O*-benzyl-2-*O*-levulinoyl- $\alpha$ -L-idopyranosyluronate)-(1→4)-(3-*O*-benzyl-2-deoxy-6-*O*-2-naphthylmethyl-2-trifluoroacetamido- $\alpha$ -D-glucopyranosyl)-(1→4)-methyl-2-*O*-benzoyl-3-*O*-benzyl- $\alpha$ -L-idopyranosyluronate (S60).**

A mixture of donor **74** (0.33 g, 0.30 mmol), acceptor **S59** (0.25 g, 0.15 mmol) and powdered 4 Å molecular sieves was suspended in anhydrous DCM (4.0 mL) and stirred at RT. After 30 min, NIS (0.15 g, 0.66 mmol) and AgOTf (24 mg, 0.090 mmol) were added. The solution was stirred for another 1 h before Et<sub>3</sub>N (0.10 mL) was added. The mixture was filtered, concentrated, and the residue was purified by silica gel column chromatography (elution with 3:1 → 2:1 hexanes/EtOAc) to afford compound **S60** (0.32 g, 80%) as a colorless foam. *R*<sub>f</sub> 0.54 (3:2 hexanes/EtOAc); <sup>1</sup>H NMR (400 MHz, CDCl<sub>3</sub>): δ 8.01–7.83 (m, 8H, Ar), 7.66–7.02 (m, 46H, Ar), 6.92–6.90 (m, 2H, Ar), 6.20 (d, *J* = 7.7 Hz, 1H, NH), 5.59 (t, *J* = 9.5 Hz, 1H, H-4'''), 5.45 (d, *J* = 4.7 Hz, 1H, H-1''), 5.18–5.08 (m, 6H,

H-1''', H-1', H-1, H-2, NCO<sub>2</sub>CH<sub>2</sub>), 5.00 (t, *J* = 5.2 Hz, 1H, H-2''), 4.83–4.71 (m, 6H), 4.65–4.45 (m, 7H), 4.17–3.86 (m, 10H), 3.78–3.62 (m, 5H), 3.59 (s, 3H, OCH<sub>3</sub>), 3.51–3.42 (m, 3H), 3.41 (s, 3H, OCH<sub>3</sub>), 3.22–3.10 (m, 2H, NCH<sub>2</sub>), 2.94–2.91 (m, 2H, PhCH<sub>2</sub>CH<sub>2</sub>), 2.67–2.53 (m, 2H, CH<sub>2</sub>), 2.45–2.31 (m, 4H, CH<sub>2</sub>, PhCH<sub>2</sub>CH<sub>2</sub>), 2.10 (s, 3H, CH<sub>3</sub>C=O), 1.60–1.48 (m, 4H, 2 X CH<sub>2</sub>), 1.35–1.27 (m, 2H, CH<sub>2</sub>), 1.01 (s, 9H, (CH<sub>3</sub>)<sub>3</sub>C); <sup>13</sup>C NMR (100 MHz, CDCl<sub>3</sub>): δ 205.8 (CH<sub>3</sub>C=OCH<sub>2</sub>), 171.9, 169.5, 169.2, 165.4, 164.8, 157.0 (q, <sup>2</sup>*J*<sub>C,F</sub> = 37.0 Hz, CF<sub>3</sub>C=O), 156.1 (NCO<sub>2</sub>), 138.8, 137.7, 137.5, 137.2, 137.1, 135.6, 135.5, 135.3, 133.8, 133.3, 133.1, 133.0, 132.9, 129.7, 129.6, 129.6, 129.2, 129.0, 128.6, 128.4, 128.4, 128.3, 128.2, 128.1, 128.1, 128.0, 127.9, 127.9, 127.8, 127.7, 127.6, 127.6, 127.3, 127.3, 127.2, 127.1, 126.9, 126.5, 126.1, 125.9, 115.5 (q, <sup>1</sup>*J*<sub>C,F</sub> = 287 Hz, CF<sub>3</sub>), 99.0 (C-1), 98.1 (C-1'''), 97.8 (C-1'), 97.5 (C-1'''), 75.3, 75.0, 75.0, 74.5, 74.1, 73.9, 73.6, 73.0, 72.7, 72.6, 71.9, 71.4, 70.7 (C-2'' ), 70.3, 70.2 (C-4'' ), 68.9, 68.0, 67.1, 66.8, 62.9, 62.0, 53.5, 52.7 (C-2' ), 52.1 (OCH<sub>3</sub>), 51.8 (OCH<sub>3</sub>), 47.1 (NCH<sub>2</sub>Ph), 37.7 (CH<sub>2</sub>C=O), 32.9 (t, <sup>2</sup>*J*<sub>C,F</sub> = 22.3 Hz, CH<sub>2</sub>CF<sub>2</sub>), 29.7, 29.1, 27.7, 26.6 (CH<sub>3</sub>)<sub>3</sub>C), 26.2 (t, <sup>3</sup>*J*<sub>C,F</sub> = 4.0 Hz, CH<sub>2</sub>CH<sub>2</sub>CF<sub>2</sub>), 23.3, 19.1 (CH<sub>3</sub>)<sub>3</sub>C); HRMS (ESI-TOF) *m/z* [M + H]<sup>+</sup> calcd for C<sub>132</sub>H<sub>132</sub>F<sub>20</sub>N<sub>5</sub>O<sub>28</sub>Si 2642.8509; Found 2642.8531. gHSQC 2-D NMR (without <sup>1</sup>H decoupling): <sup>1</sup>*J*<sub>C1,H1</sub> = 170.6 Hz, <sup>1</sup>*J*<sub>C1',H1'</sub> = 172.5 Hz, <sup>1</sup>*J*<sub>C1'',H1''</sub> = 173.3 Hz, <sup>1</sup>*J*<sub>C1''',H1'''</sub> = 173.3 Hz. The coupling constants of <sup>1</sup>*J*<sub>C1,H1</sub> (170.6 Hz) and <sup>1</sup>*J*<sub>C1',H1'</sub> (172.5 Hz) are above 170 Hz, which confirms the α configuration of the two IdoA-GlcN linkages.<sup>4</sup> In addition, the coupling constants of <sup>1</sup>*J*<sub>C1'',H1''</sub> (173.3 Hz) and <sup>1</sup>*J*<sub>C1''',H1'''</sub> (173.3 Hz) are greater than 170 Hz, which is indicative of the α configuration for the two GlcN-IdoA linkages.

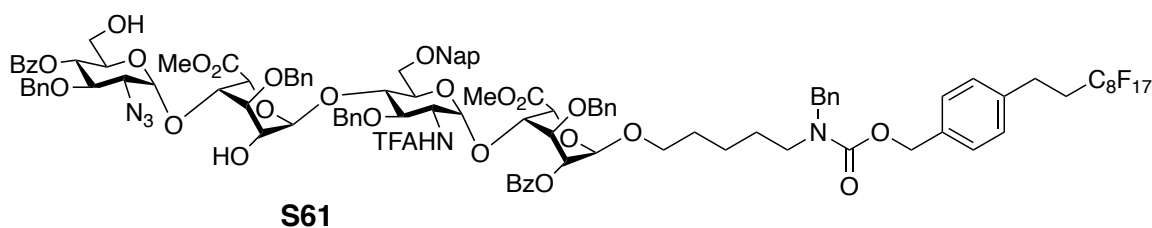

***N*-(Benzyl)-3,3,4,4,5,5,6,6,7,7,8,8,9,9,10,10,10-heptafluorooctyl-benzyloxycarbonyl-5-aminopentyl (2-azido-3-*O*-benzyl-4-*O*-benzoyl-2-deoxy- $\alpha$ -D-glucopyranosyl)-(1 $\rightarrow$ 4)-(methyl 3-*O*-benzyl- $\alpha$ -L-idopyranosyluronate)-(1 $\rightarrow$ 4)-(3-*O*-benzyl-2-deoxy-6-*O*-2-naphthylmethyl-2-trifluoroacetamido- $\alpha$ -D-glucopyranosyl)-(1 $\rightarrow$ 4)-(methyl 3-*O*-benzyl-2-*O*-benzoyl- $\alpha$ -L-idopyranosyluronate (S61).**

Compound **S60** (50 mg, 0.019 mmol) was treated according to the general procedures for Lev deprotection and TBDPS deprotection to give tetrasaccharide **S61** (38 mg, 86%);  $R_f$  0.50 (1:1 hexanes/EtOAc);  $^1\text{H NMR}$  (400 MHz,  $\text{CDCl}_3$ ):  $\delta$  8.00–7.83 (m, 7H, ArH), 7.65–7.09 (m, 37H, ArH), 6.94–6.92 (m, 2H, ArH), 6.24 (br, 1H, NH), 5.37 (s, 1H, H-1"), 5.22–5.12 (m, 4H, H-4"', H-2,  $\text{NCO}_2\text{CH}_2$ ), 5.09 (s, 1H, H-1), 5.04 (d,  $J = 3.8$  Hz, 1H, H-1'''), 5.01 (s, 1H, H-1'), 4.94–4.88 (m, 2H), 4.82–4.63 (m, 7H), 4.56 (d,  $J = 11.4$  Hz, 1H,  $\text{CH}_2\text{Ph}$ ), 4.47–4.42 (m, 3H,  $\text{NCH}_2\text{Ph}$ ,  $\text{CH}_2\text{Ph}$ ), 4.27 (td,  $J = 10.5, 3.5$  Hz, 1H, H-2'), 4.17–4.04 (m, 5H), 3.91–3.87 (m, 2H), 3.82–3.42 (m, 12H), 3.28 (s, 3H,  $\text{OCH}_3$ ), 3.23–3.13 (m, 2H,  $\text{NCH}_2$ ), 2.94–2.90 (m, 2H,  $\text{PhCH}_2\text{CH}_2$ ), 2.70 (br, 1H, OH), 2.44–2.31 (m, 2H,  $\text{PhCH}_2\text{CH}_2$ ), 1.65–1.44 (m, 4H, 2 X  $\text{CH}_2$ ), 1.39–1.29 (m, 2H,  $\text{CH}_2$ );  $^{13}\text{C NMR}$  (100 MHz,  $\text{CDCl}_3$ ):  $\delta$  169.6 (C=O), 169.5 (C=O), 166.4 (C=O), 165.4 (C=O), 137.4, 137.2, 137.0, 136.9, 135.0, 134.0, 133.8, 133.3, 133.1, 129.8, 129.6, 129.0, 128.8, 128.6, 128.5, 128.4, 128.3, 128.2, 128.1, 128.0, 127.9, 127.7, 127.1, 101.8 (C-1'''), 99.0 (C-1), 98.2 (C-1'), 95.7 (C-1'''), 78.3, 77.6, 75.7, 75.4, 74.5, 73.8, 72.9, 72.8, 72.5, 72.2, 71.4, 71.2, 70.9, 68.7, 67.7, 67.6, 66.8, 63.3, 60.6, 60.4, 52.0, 50.2, 47.1, 33.2, 32.9 (t,  $^2J_{\text{C,F}} = 21.4$  Hz,  $\text{CH}_2\text{CF}_2$ ), 29.1, 27.8, 26.2 (t,  $^3J_{\text{C,F}} = 4.0$  Hz,  $\text{CH}_2\text{CH}_2\text{CF}_2$ ), 23.2; HRMS (ESI-TOF)  $m/z$   $[\text{M} + \text{H}]^+$  calcd for  $\text{C}_{111}\text{H}_{108}\text{F}_{20}\text{N}_5\text{O}_{26}$  2306.6963; Found 2306.6932.

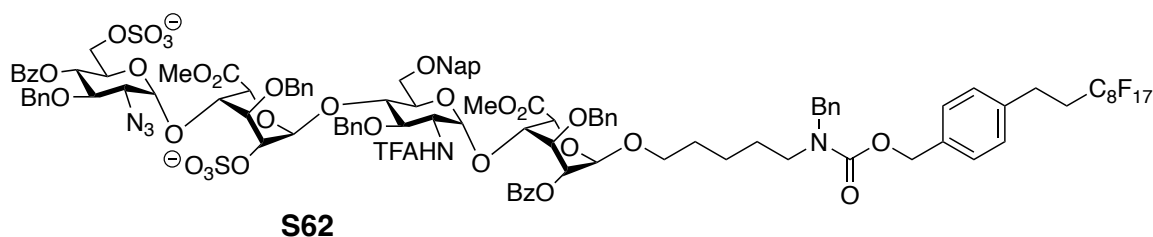



***N*-(Benzyl)-3,3,4,4,5,5,6,6,7,7,8,8,9,9,10,10,10-heptafluorooctyl-benzyloxycarbonyl-5-aminopentyl (2-azido-3-*O*-benzyl-4-*O*-benzoyl-2-deoxy-6-*O*-sulfonato- $\alpha$ -D-glucopyranosyl)-(1 $\rightarrow$ 4)-(methyl 3-*O*-benzyl-2-*O*-sulfonato- $\alpha$ -L-idopyranosyluronate)-(1 $\rightarrow$ 4)-(3-*O*-benzyl-2-deoxy-6-*O*-2-naphthylmethyl-2-trifluoroacetamido- $\alpha$ -D-glucopyranosyl)-(1 $\rightarrow$ 4)-(methyl 3-*O*-benzyl-2-*O*-benzoyl- $\alpha$ -L-idopyranosyluronate disodium salt (**S62**).**

Compound **S61** (38 mg, 0.016 mmol) was treated according to the general procedure for *O*-sulfation to give tetrasaccharide **S62** (39 mg, 95%);  $R_f$  0.60 (7:2:1 EtOAc/CH<sub>3</sub>OH/H<sub>2</sub>O); <sup>1</sup>H NMR (400 MHz, CDCl<sub>3</sub>):  $\delta$  9.51 (br 1H, NH), 8.03–7.75 (m, 7H, ArH), 7.57–7.03 (m, 39H, ArH), 5.58 (s, 1H, H-1''), 5.32–5.02 (m, 7H, H-4''', H-1', H-2, H-1, H-1''', NCO<sub>2</sub>CH<sub>2</sub>), 4.95–4.69 (m, 8H), 4.59–4.42 (m, 5H), 4.33–3.95 (m, 11H), 3.88–3.39 (m, 12H), 3.18–3.08 (m, 2H, NCH<sub>2</sub>), 2.95–2.88 (m, 2H, PhCH<sub>2</sub>CH<sub>2</sub>), 2.44–2.30 (m, 2H, PhCH<sub>2</sub>CH<sub>2</sub>), 1.56–1.39 (m, 4H, 2 X CH<sub>2</sub>), 1.30–1.15 (m, 2H, CH<sub>2</sub>); <sup>13</sup>C NMR (100 MHz, CDCl<sub>3</sub>):  $\delta$  133.6, 129.7, 128.6, 128.2, 128.0, 127.7, 127.3, 126.8, 126.4, 125.8, 99.0 (C-1''), 98.8 (C-1), 96.8 (C-1'), 97.1 (C-1'''), 77.9, 77.1, 74.3, 74.1, 73.7, 73.0, 72.8, 72.5, 71.6, 70.9, 70.4, 69.8, 69.0, 68.9, 68.6, 68.0, 67.6, 66.7, 65.8, 62.8, 52.4, 52.2, 51.9, 50.4, 46.9, 46.4, 32.9, 29.2, 27.6, 26.1, 23.2; HRMS (ESI-TOF)  $m/z$  [M – Na]<sup>+</sup> calcd for C<sub>109</sub>H<sub>105</sub>F<sub>16</sub>N<sub>5</sub>O<sub>32</sub>S<sub>2</sub>Na 2486.5762; Found 2486.5725.

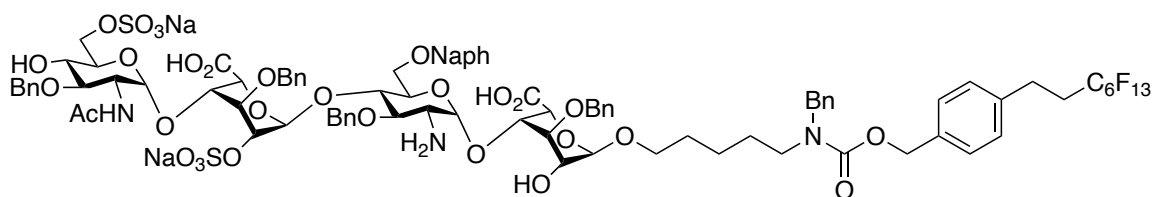

**S64**

***N*-(Benzyl)-3,3,4,4,5,5,6,6,7,7,8,8,9,9,10,10,10-heptafluorooctyl-benzyloxycarbonyl-5-aminopentyl (2-acetamido-3-*O*-benzyl-2-deoxy-6-*O*-sulfonato- $\alpha$ -D-glucopyranosyl)-(1 $\rightarrow$ 4)-(3-*O*-benzyl-2-*O*-sulfonato- $\alpha$ -L-idopyranosyluronate)-(1 $\rightarrow$ 4)-(2-amino-3-*O*-benzyl-2-deoxy-6-*O*-2-naphthylmethyl-**

**$\alpha$ -D-glucopyranosyl)-(1 $\rightarrow$ 4)-(3-O-benzyl- $\alpha$ -L-idopyranosyluronate disodium salt (S64).**

Compound **S49** (30 mg, 0.012 mmol) was treated according to the general procedure for hydrolysis to give tetrasaccharide **S64** (25 mg, 93%);  $R_f$  0.38 (12:5:3:1 EtOAc/Py/H<sub>2</sub>O/AcOH); <sup>1</sup>H NMR (400 MHz, CD<sub>3</sub>OD):  $\delta$  7.86–7.70 (m, 5H, ArH), 7.53–7.50 (m, 1H, ArH), 7.39–7.17 (m, 30H, ArH), 5.70 (s, 1H, H-1''), 5.22–5.07 (m, 4H), 4.87–4.53 (m, 13H), 4.41 (s, 2H), 4.33–4.15 (m, 5H), 4.09–3.78 (m, 9H), 3.73–3.62 (m, 3H), 3.44–3.36 (m, 1H), 3.18–3.08 (m, 3H, H-2', NCH<sub>2</sub>), 2.90–2.86 (m, 2H, PhCH<sub>2</sub>CH<sub>2</sub>), 2.48–2.35 (m, 2H, PhCH<sub>2</sub>CH<sub>2</sub>), 1.98 (s, 3H, COCH<sub>3</sub>), 1.56–1.39 (m, 4H, 2 X CH<sub>2</sub>), 1.30–1.15 (m, 2H, CH<sub>2</sub>); <sup>13</sup>C NMR (100 MHz, CD<sub>3</sub>OD):  $\delta$  134.6, 129.0, 128.0, 127.7, 127.4, 126.5, 126.0, 125.5, 101.1, 97.1, 97.0, 91.9, 80.2, 76.3, 74.8, 74.6, 74.0, 73.0, 72.4, 72.0, 71.6, 71.3, 70.6, 69.9, 67.9, 66.7, 67.6, 67.5, 66.7, 66.1, 65.9, 54.1, 52.8, 50.4, 46.7, 46.4, 32.2, 29.0, 27.3, 25.6, 23.2, 22.0; HRMS (ESI-TOF)  $m/z$  [M – Na]<sup>-</sup> calcd for C<sub>93</sub>H<sub>96</sub>F<sub>13</sub>N<sub>3</sub>O<sub>30</sub>S<sub>2</sub>Na<sub>3</sub> 2114.5006; Found 2114.5037.

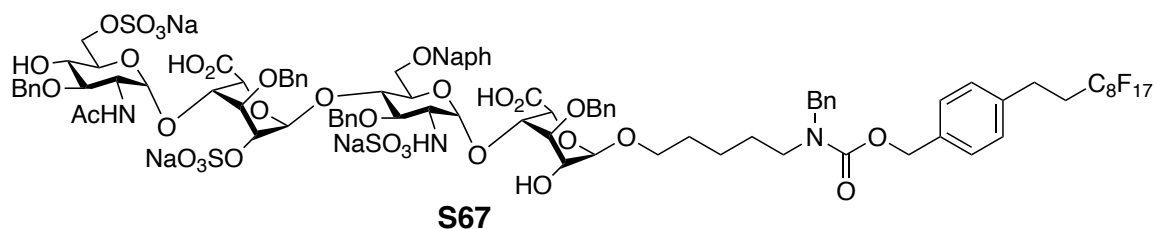

***N*-(Benzyl)-3,3,4,4,5,5,6,6,7,7,8,8,9,9,10,10,10-heptafluorooctyl-benzyloxycarbonyl-5-aminopentyl (2-acetamido-3-O-benzyl-2-deoxy-6-O-sulfonato- $\alpha$ -D-glucopyranosyl)-(1 $\rightarrow$ 4)-(3-O-benzyl-2-O-sulfonato- $\alpha$ -L-idopyranosyluronate)-(1 $\rightarrow$ 4)-(3-O-benzyl-2-deoxy-6-O-2-naphthylmethyl-2-sulfamino- $\alpha$ -D-glucopyranosyl)-(1 $\rightarrow$ 4)-(3-O-benzyl- $\alpha$ -L-idopyranosyluronate disodium salt (S67).**

Compound **S63** (30 mg, 0.012 mmol) was treated according to the general procedure for hydrolysis and *N*-sulfation to give tetrasaccharide **S67** (19 mg, 70%); <sup>1</sup>H NMR (400 MHz,

CD<sub>3</sub>OD):  $\delta$  7.82–7.73 (m, 4H, ArH), 7.54–7.44 (m, 3H, ArH), 7.40–7.03 (m, 29H, ArH), 5.95 (s, 1H), 5.38 (d,  $J = 3.4$  Hz, 1H), 5.35 (d,  $J = 10.6$  Hz, 1H), 5.13–5.09 (m, 2H), 4.99 (d,  $J = 10.5$  Hz, 1H), 4.83 (d,  $J = 1.5$  Hz, 1H), 4.72–4.64 (m, 6H), 4.54 (d,  $J = 11.7$  Hz, 1H), 4.43 (s, 2H), 4.38–4.34 (m, 2H), 4.25–4.22 (m, 2H), 4.14–4.04 (m, 5H), 3.88 (s, 1H), 3.79–3.64 (m, 6H), 3.53–3.50 (m, 1H), 3.44–3.36 (m, 1H), 3.18–3.11 (m, 3H, H-2', NCH<sub>2</sub>), 2.92–2.89 (m, 2H, PhCH<sub>2</sub>CH<sub>2</sub>), 2.51–2.37 (m, 2H, PhCH<sub>2</sub>CH<sub>2</sub>), 2.06 (s, 3H, COCH<sub>3</sub>), 1.56–1.39 (m, 4H, 2 X CH<sub>2</sub>), 1.30–1.15 (m, 2H, CH<sub>2</sub>); HRMS (ESI-TOF)  $m/z$  [M – Na]<sup>+</sup> calcd for C<sub>95</sub>H<sub>95</sub>F<sub>17</sub>N<sub>3</sub>O<sub>33</sub>S<sub>3</sub>Na<sub>4</sub> 2316.4239; Found 2316.4285.

#### 4. References

1. Dey, K. K., Xie, D. & Stephens, M. A new sequence logo plot to highlight enrichment and depletion. *BMC Bioinform.* **19**, 473 (2018).
2. Schneider, T. D. & Stephens, R. M. Sequence logos: a new way to display consensus sequences. *Nucleic. Acids. Res.* **18**, 6097-6100 (1990).
3. Pawar, N. J. *et al.* Expedient synthesis of core disaccharide building blocks from natural polysaccharides for heparan sulfate oligosaccharide assembly. *Angew. Chem. Int. Ed.* **58**, 18577-18583 (2019).
4. Bock, K. & Pedersen, C. A study of <sup>13</sup>C coupling constants in hexopyranoses. *J. Chem.Soc., Perkin Trans. 2*, 293-297 (1974).
5. Zong, C., Venot, A., Dhamale, O. & Boons, G. J. Fluorous supported modular synthesis of heparan sulfate oligosaccharides. *Org. Lett.* **15**, 342-345 (2013).

5.09  
5.08  
5.06  
4.82  
4.81  
4.76  
4.76  
4.64  
4.64  
4.41  
4.40  
3.99  
3.98  
3.97  
3.94  
3.93  
3.92  
3.85  
3.84  
3.83  
3.82  
3.82  
3.81  
3.79  
3.78  
3.78  
3.77  
3.75  
3.74  
3.72  
3.72  
3.71  
3.70  
3.70  
3.69  
3.66  
3.66  
3.65  
3.64  
3.63  
3.61  
3.61  
3.58  
3.57  
3.55  
3.51  
3.50  
3.50  
3.49  
3.39  
3.38  
3.37  
3.36  
3.34  
2.91  
2.89  
2.87  
1.93  
1.91  
1.58  
1.56  
1.36  
1.34

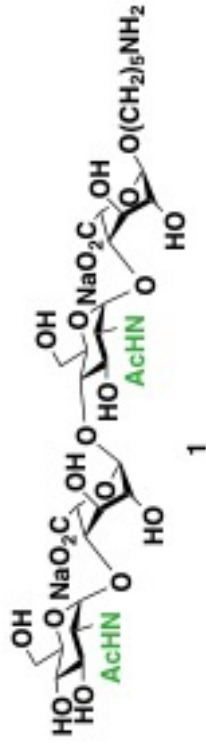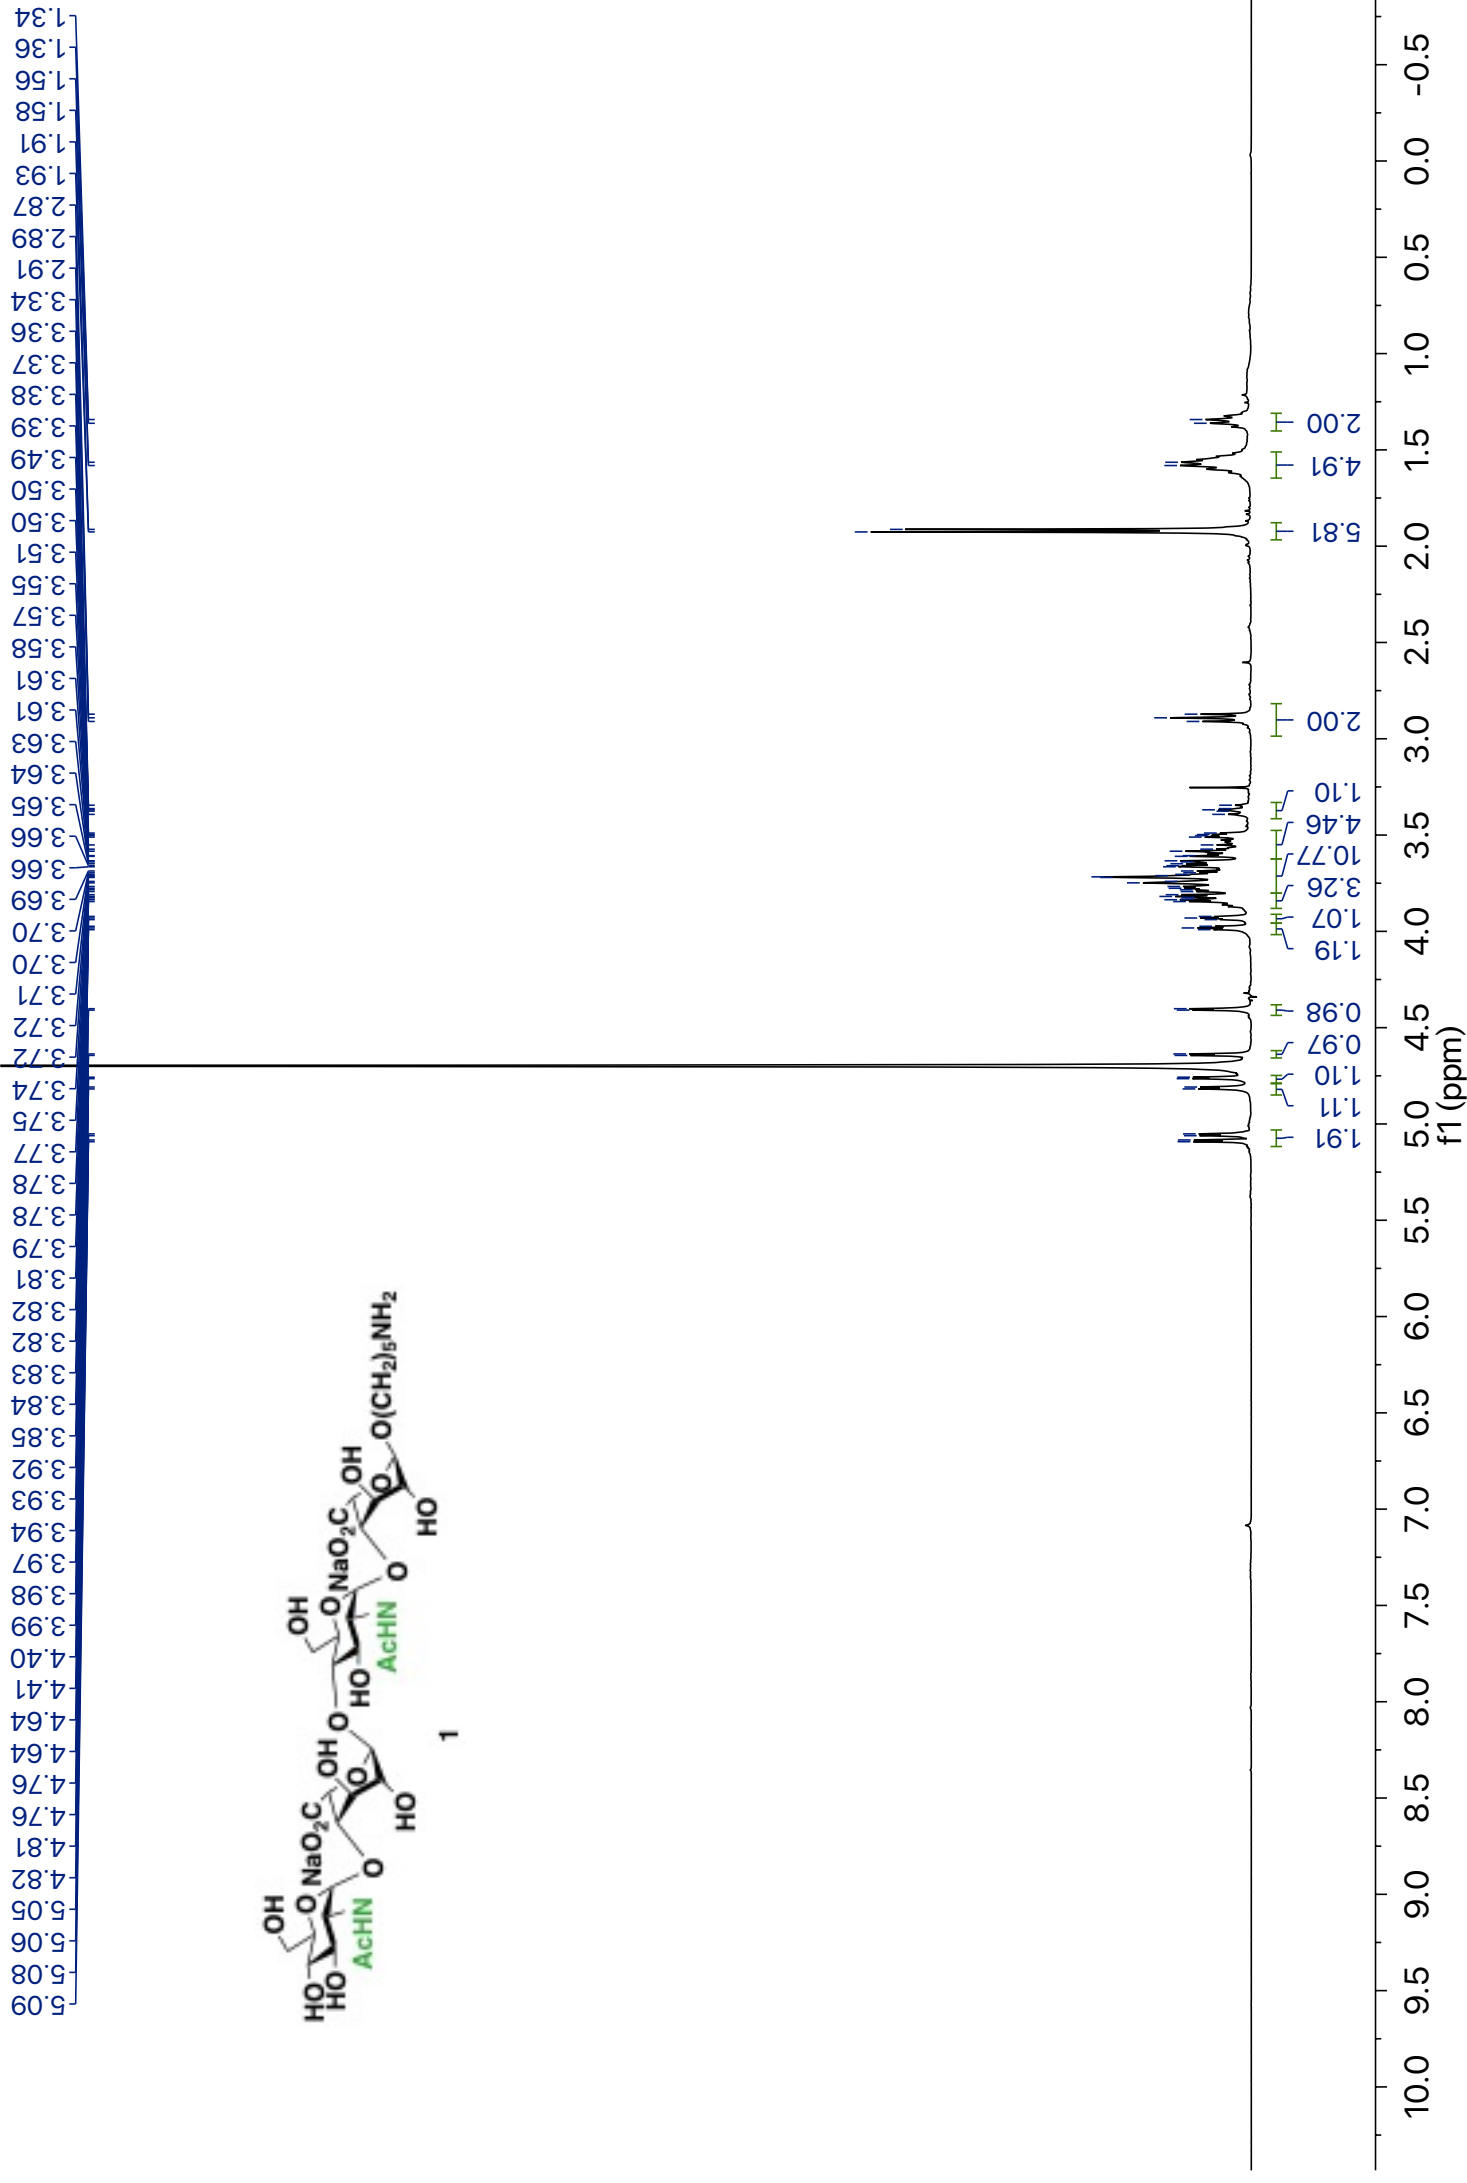

WL-2-154-D-NAC-B-NAC-C-TC.1.1.r —

175.01  
174.89  
174.38  
174.30

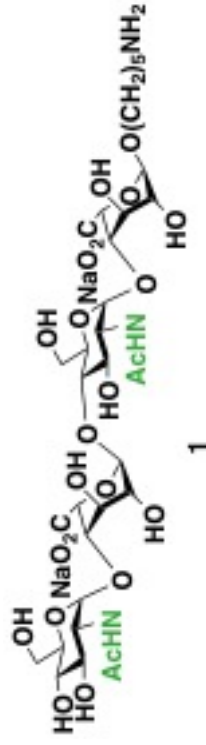

101.67  
100.75  
94.50  
94.34  
76.67  
74.29  
73.94  
71.93  
71.09  
71.05  
69.94  
69.66  
69.36  
68.81  
68.57  
68.11  
60.14  
59.62  
53.67  
53.51  
39.34  
28.00  
26.23  
22.22  
21.88  
21.86

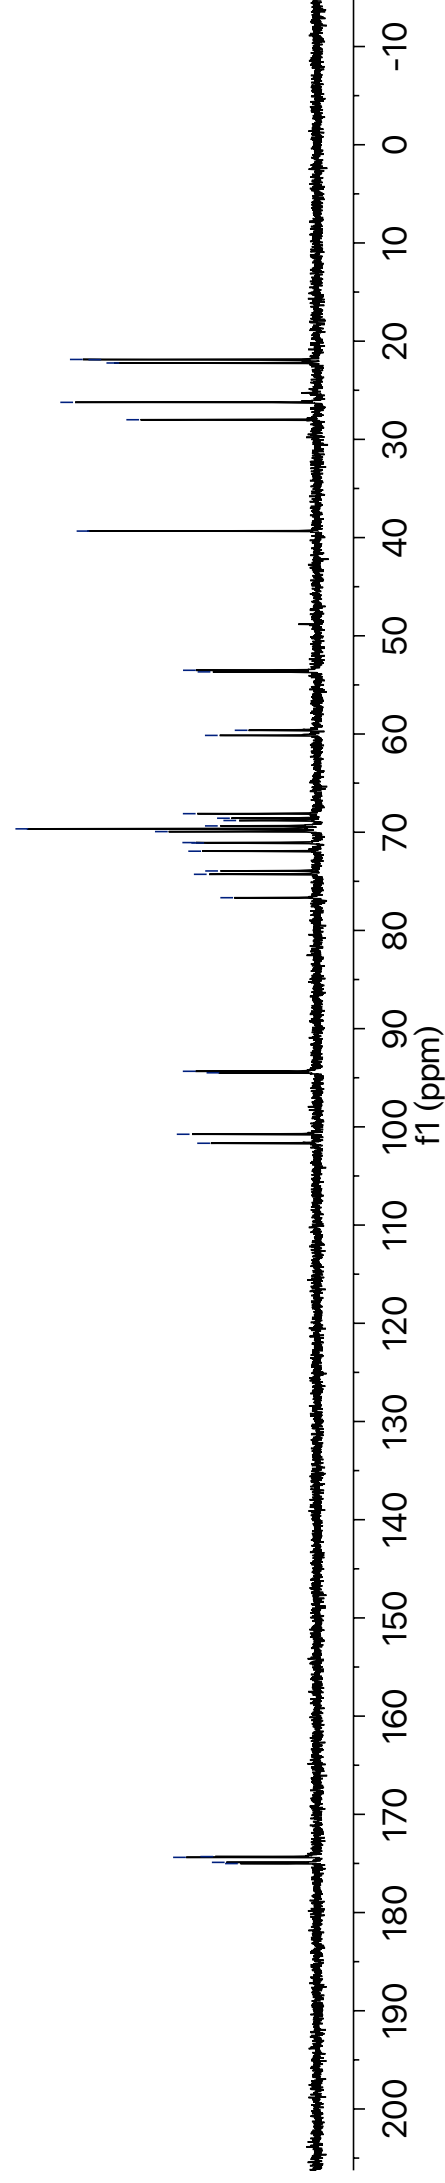

WL-2-151-D-Nac-B-NSO3-Prod-H-TC.2.1.1r —

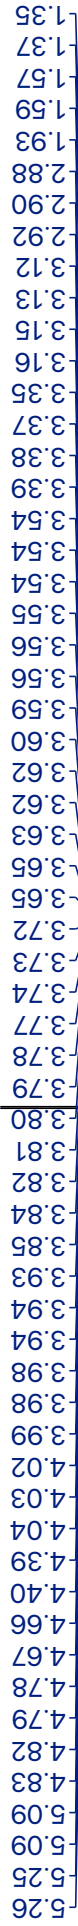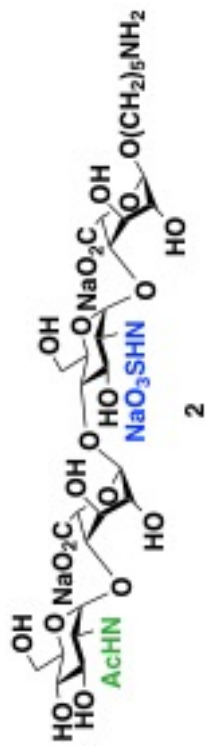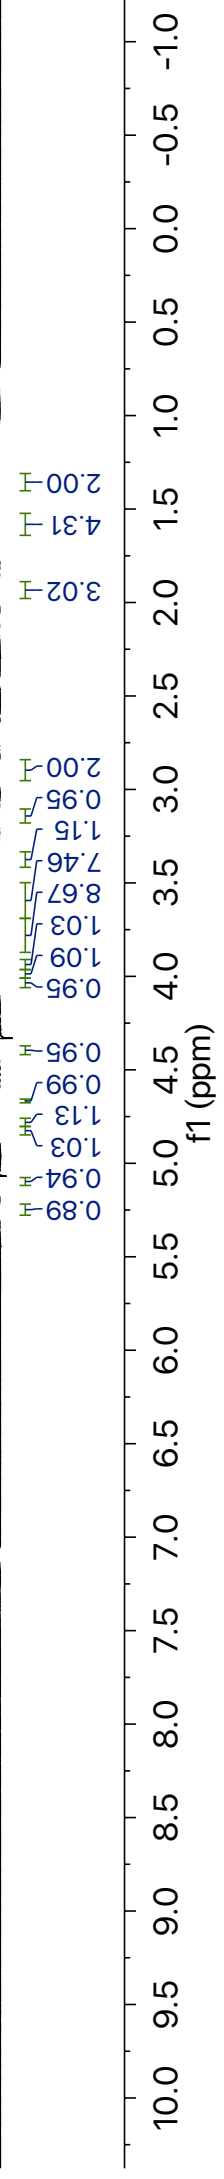

WL-2-151-D-Nac-B-NSO3-Prod-C-TC.1.1.r —

175.33  
174.97  
174.39

101.48  
100.68  
95.66  
94.37  
76.74  
74.82  
74.28  
71.93  
71.05  
70.85  
69.95  
69.68  
69.58  
68.89  
68.31  
68.07  
68.03

60.14  
59.72  
57.94  
53.52

27.94  
26.22  
22.22  
21.86

39.34

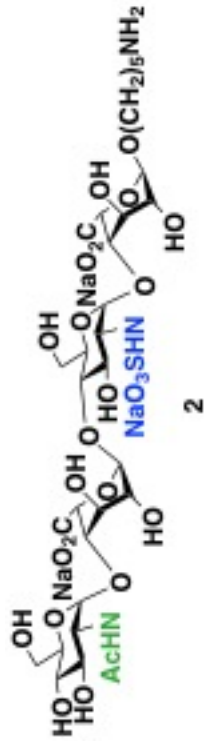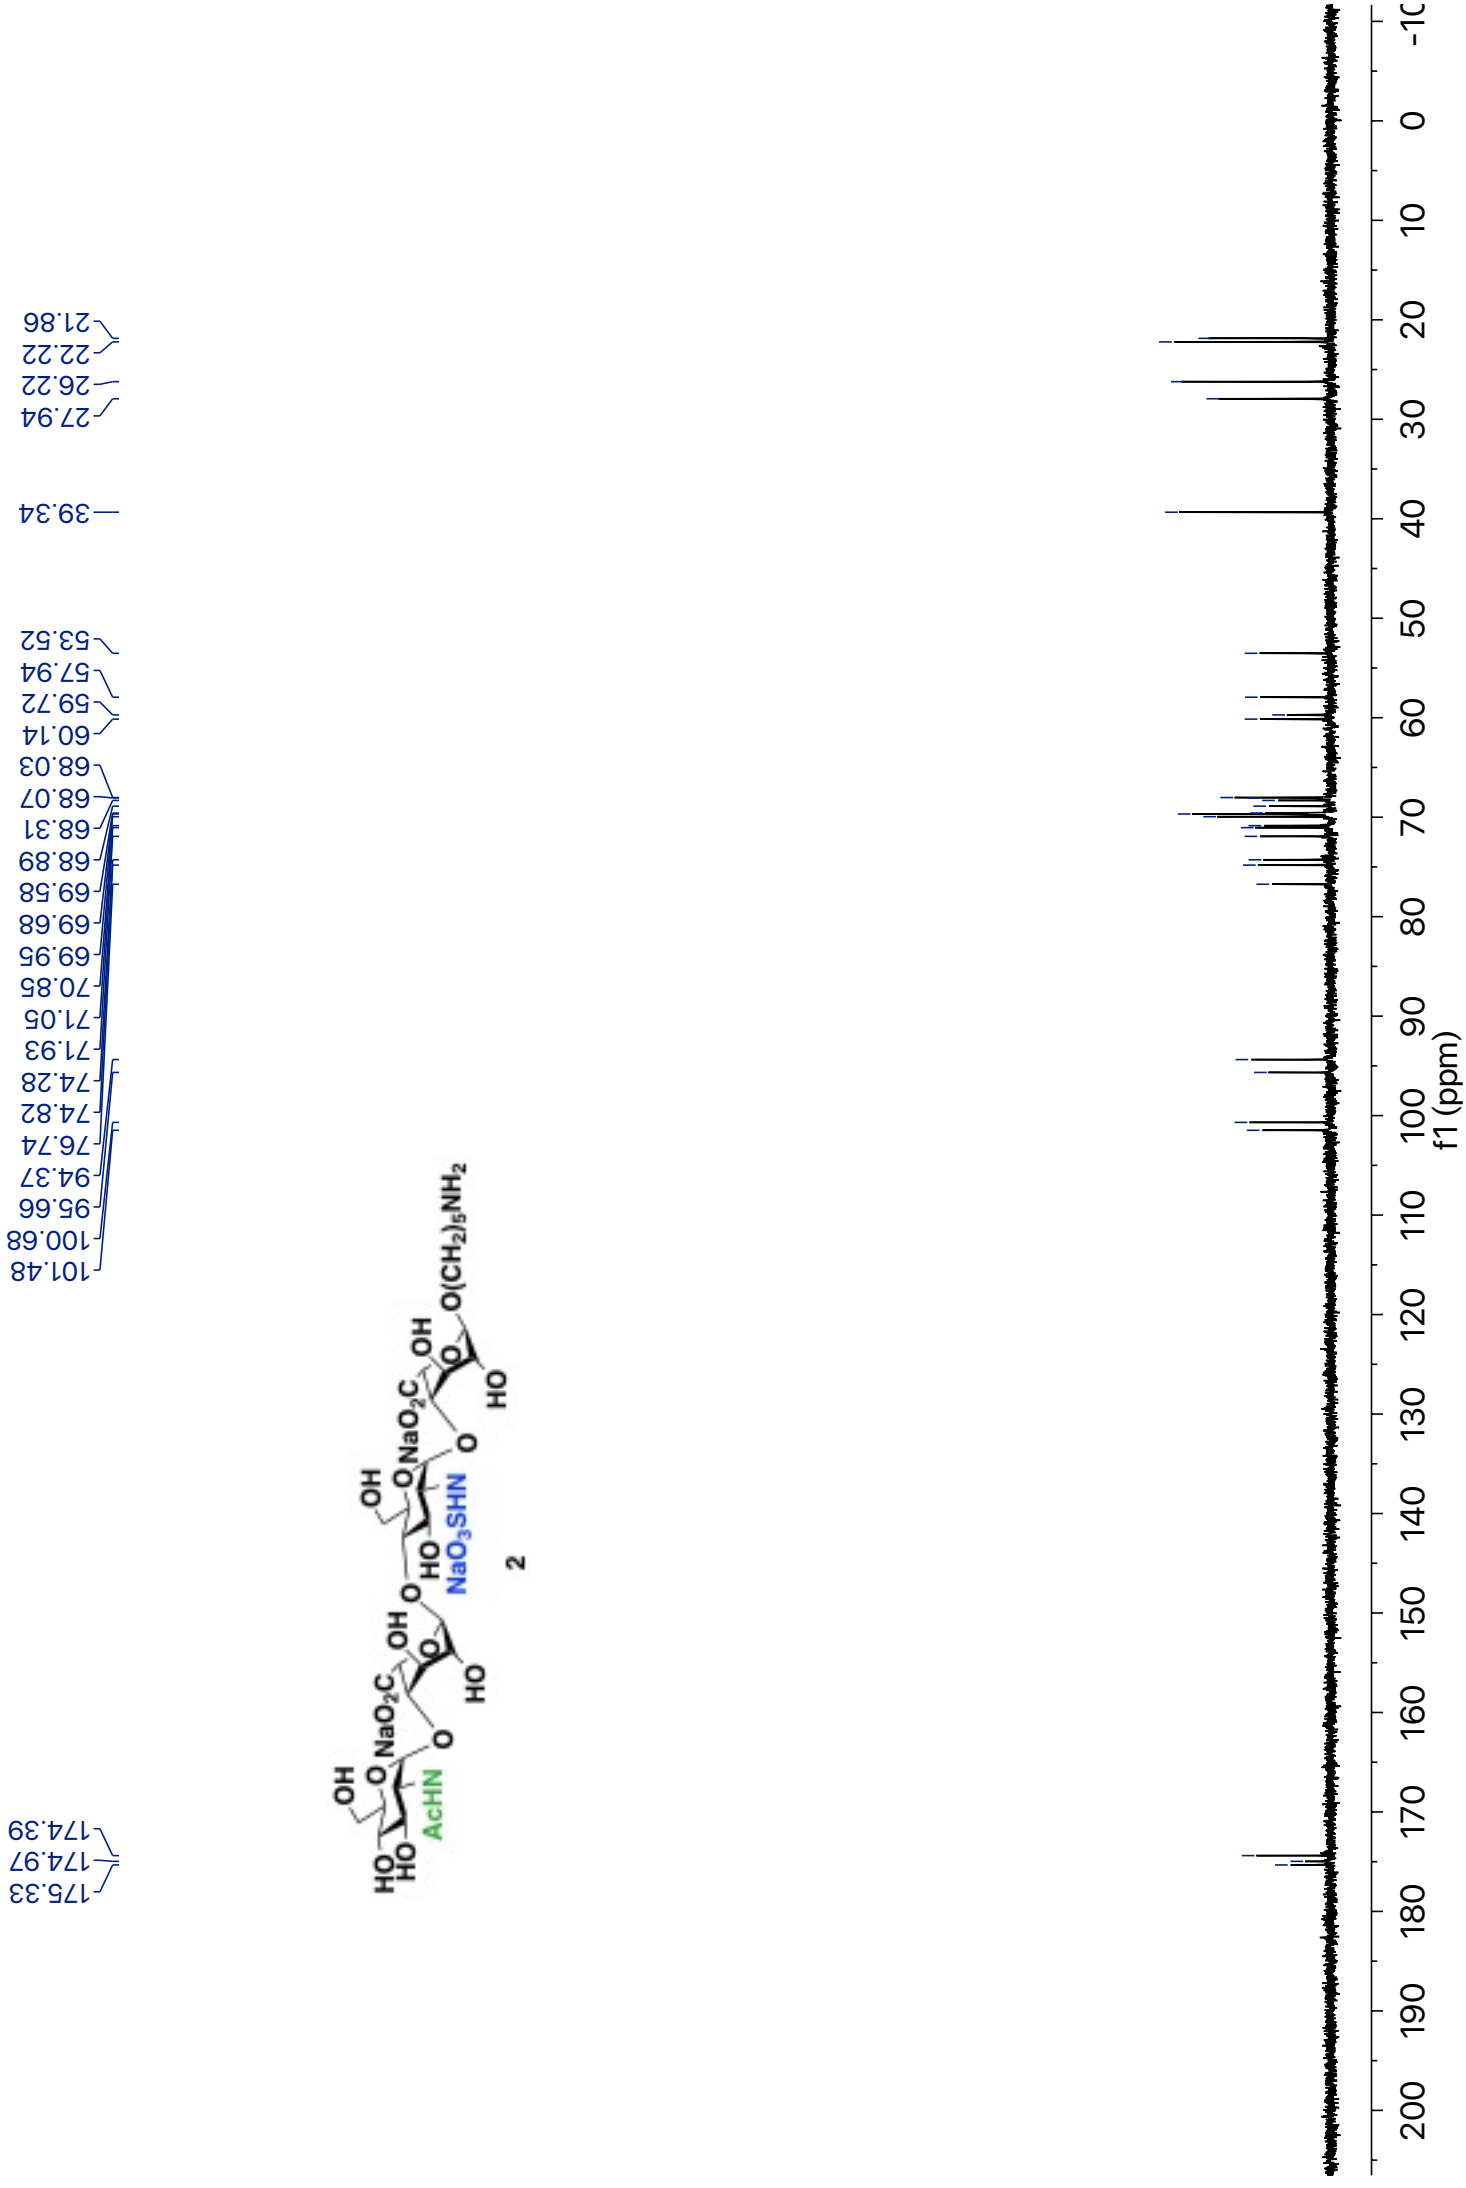

WL-2-238-GlcNS-IdoA-GlcNAc-Prod-H-TC.8.1.1r —

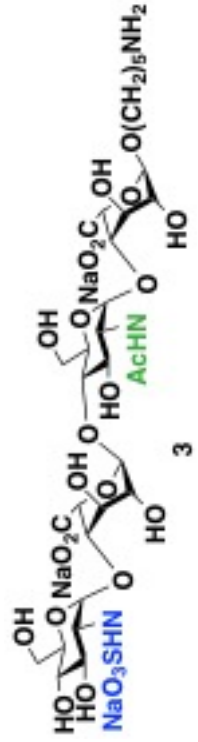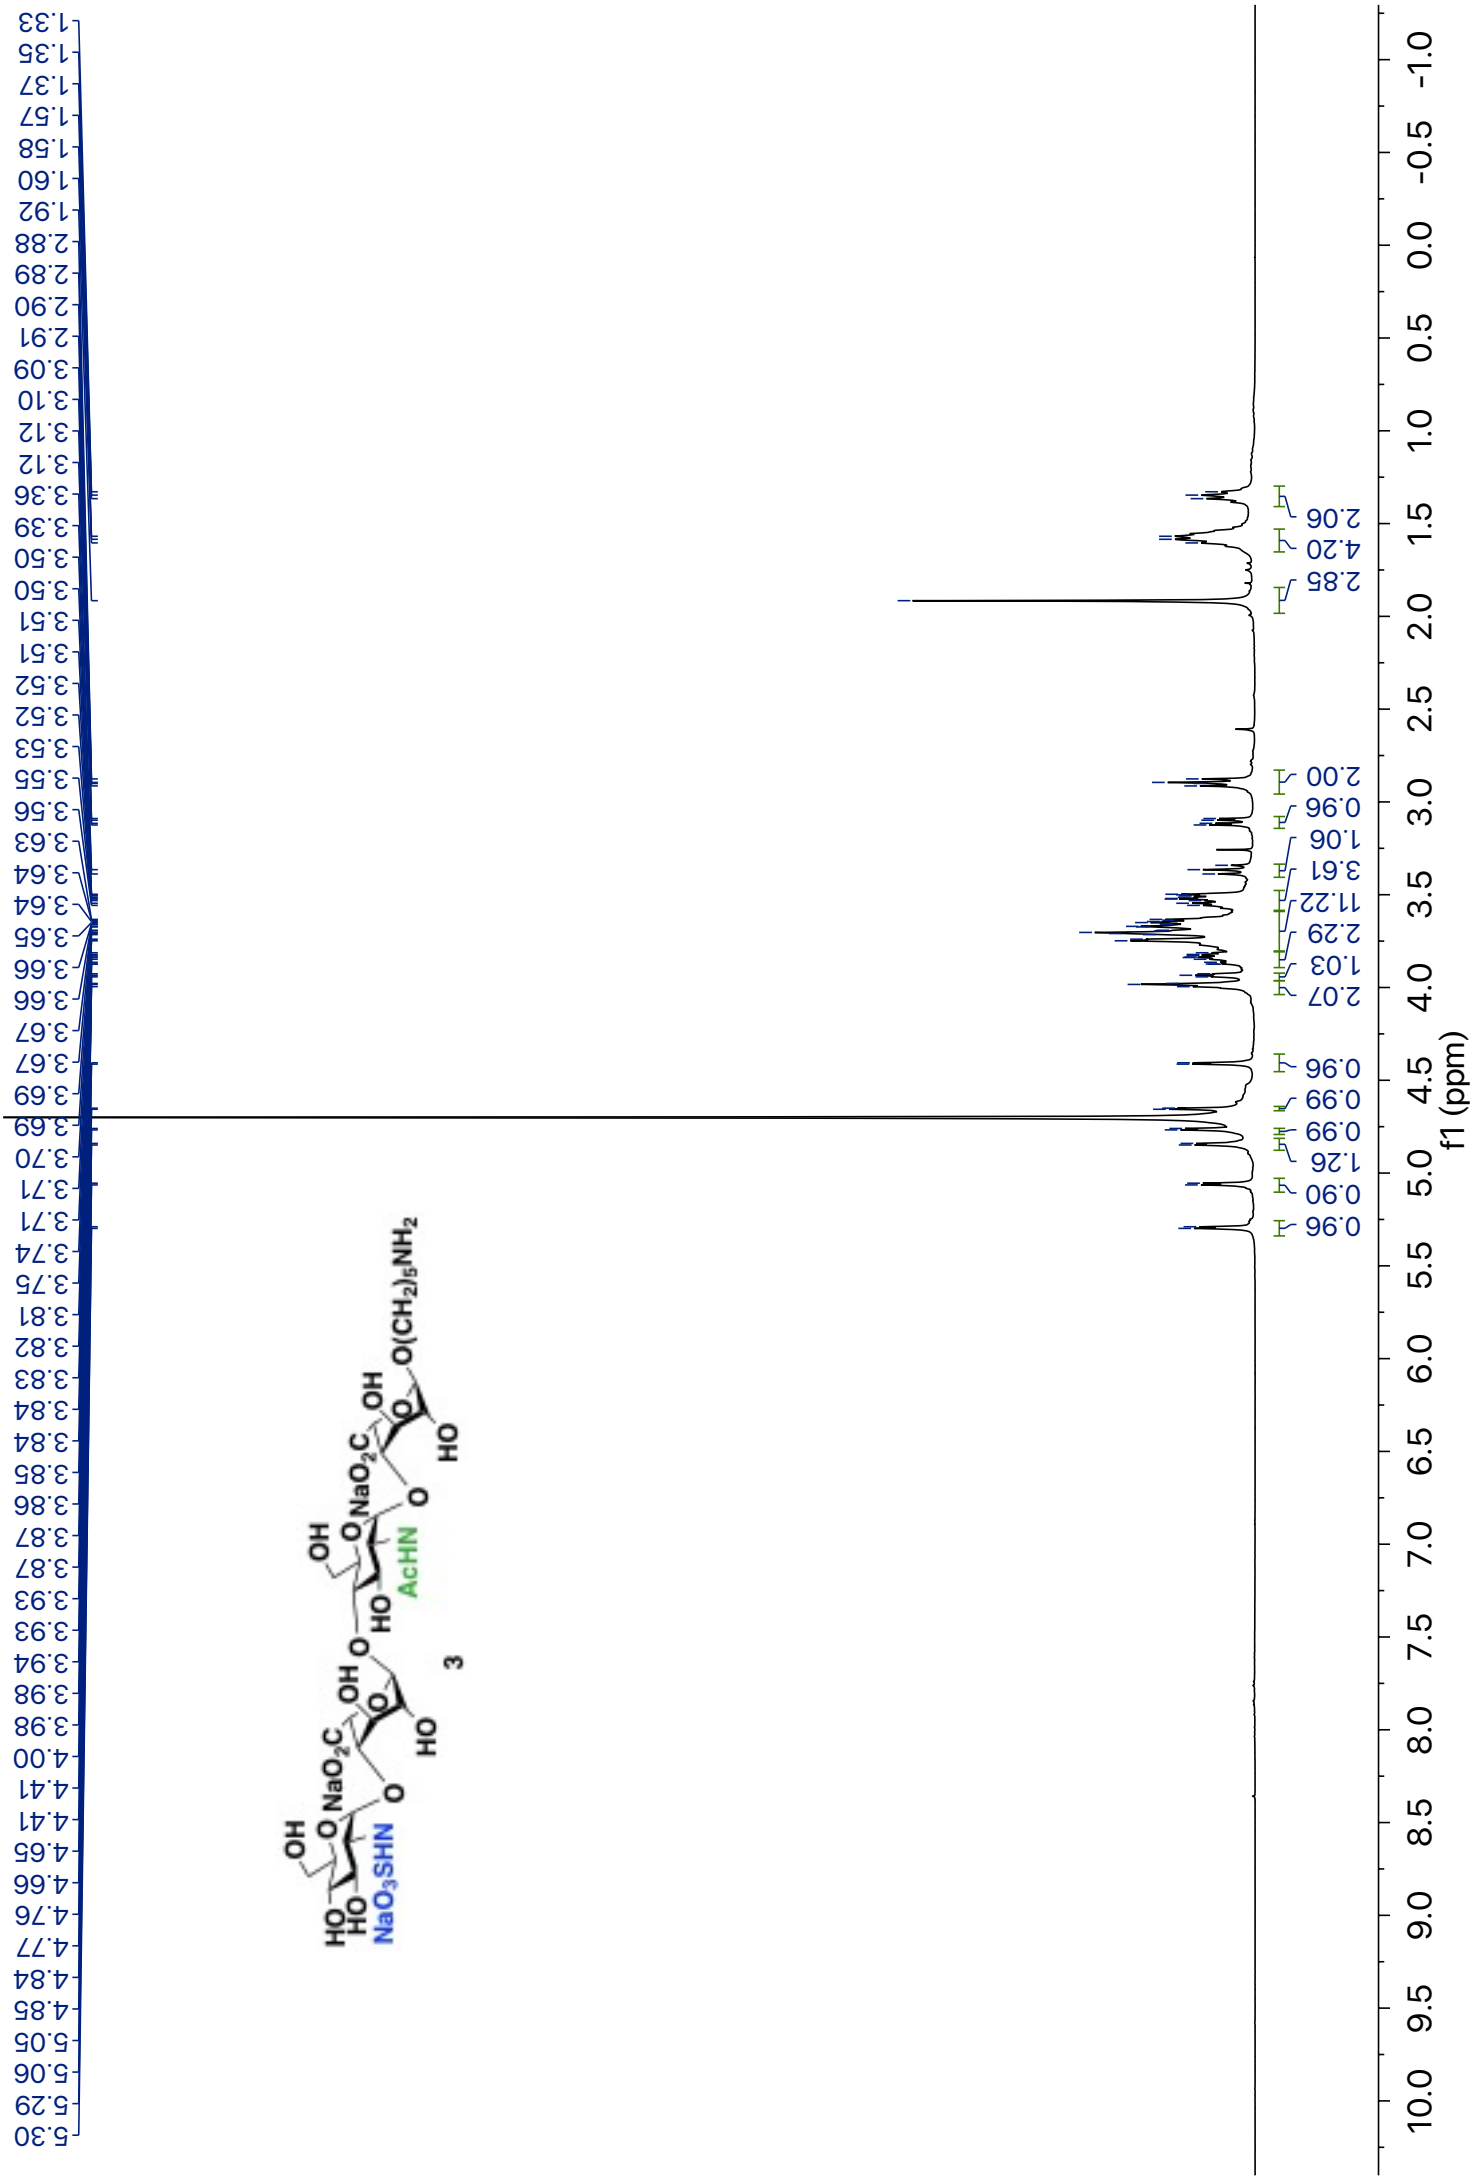



WL-2-238-GlcNS-IdoA-GlcNAc-IdoA-Prod-C-TC.7.1.1r —

175.20  
175.01  
174.30

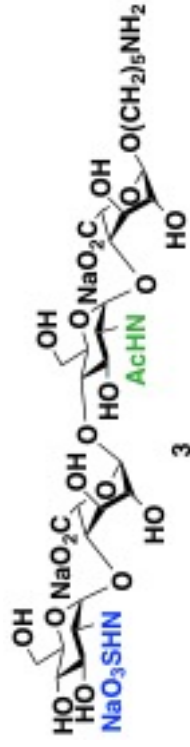

101.68  
100.77  
95.31  
94.49  
76.89  
74.78  
73.95  
71.64  
71.23  
71.12  
69.73  
69.68  
69.39  
69.34  
68.85  
68.62  
68.11  
60.19  
59.64  
57.83  
53.70  
39.34  
28.01  
26.23  
22.23  
21.89

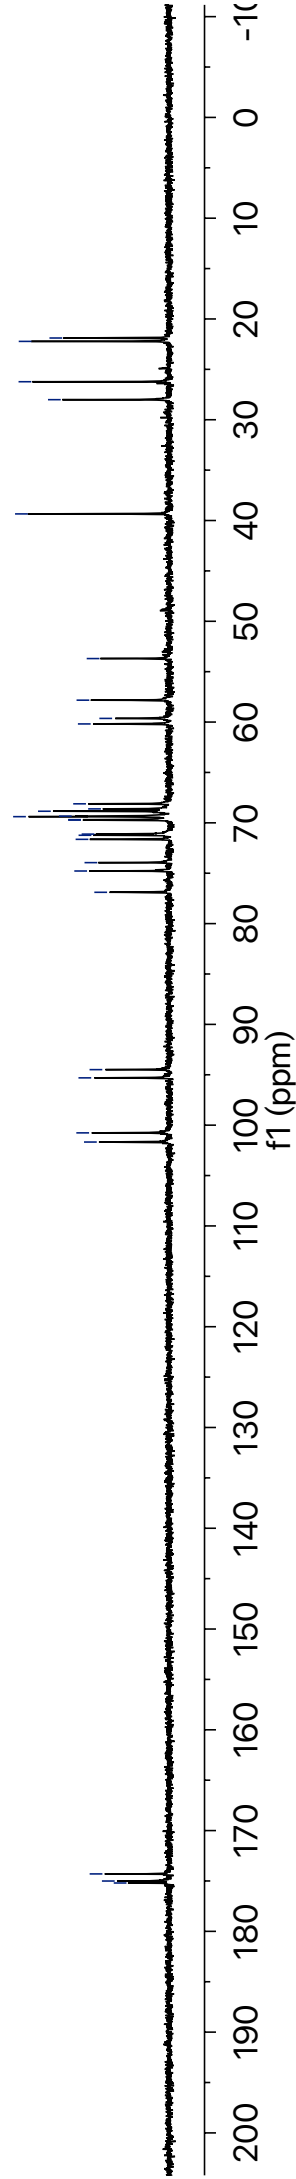

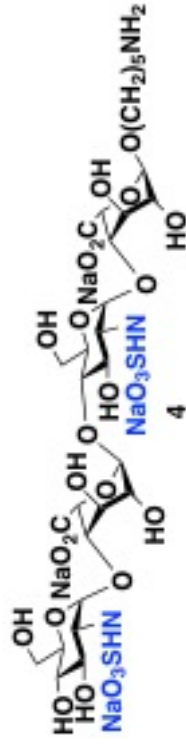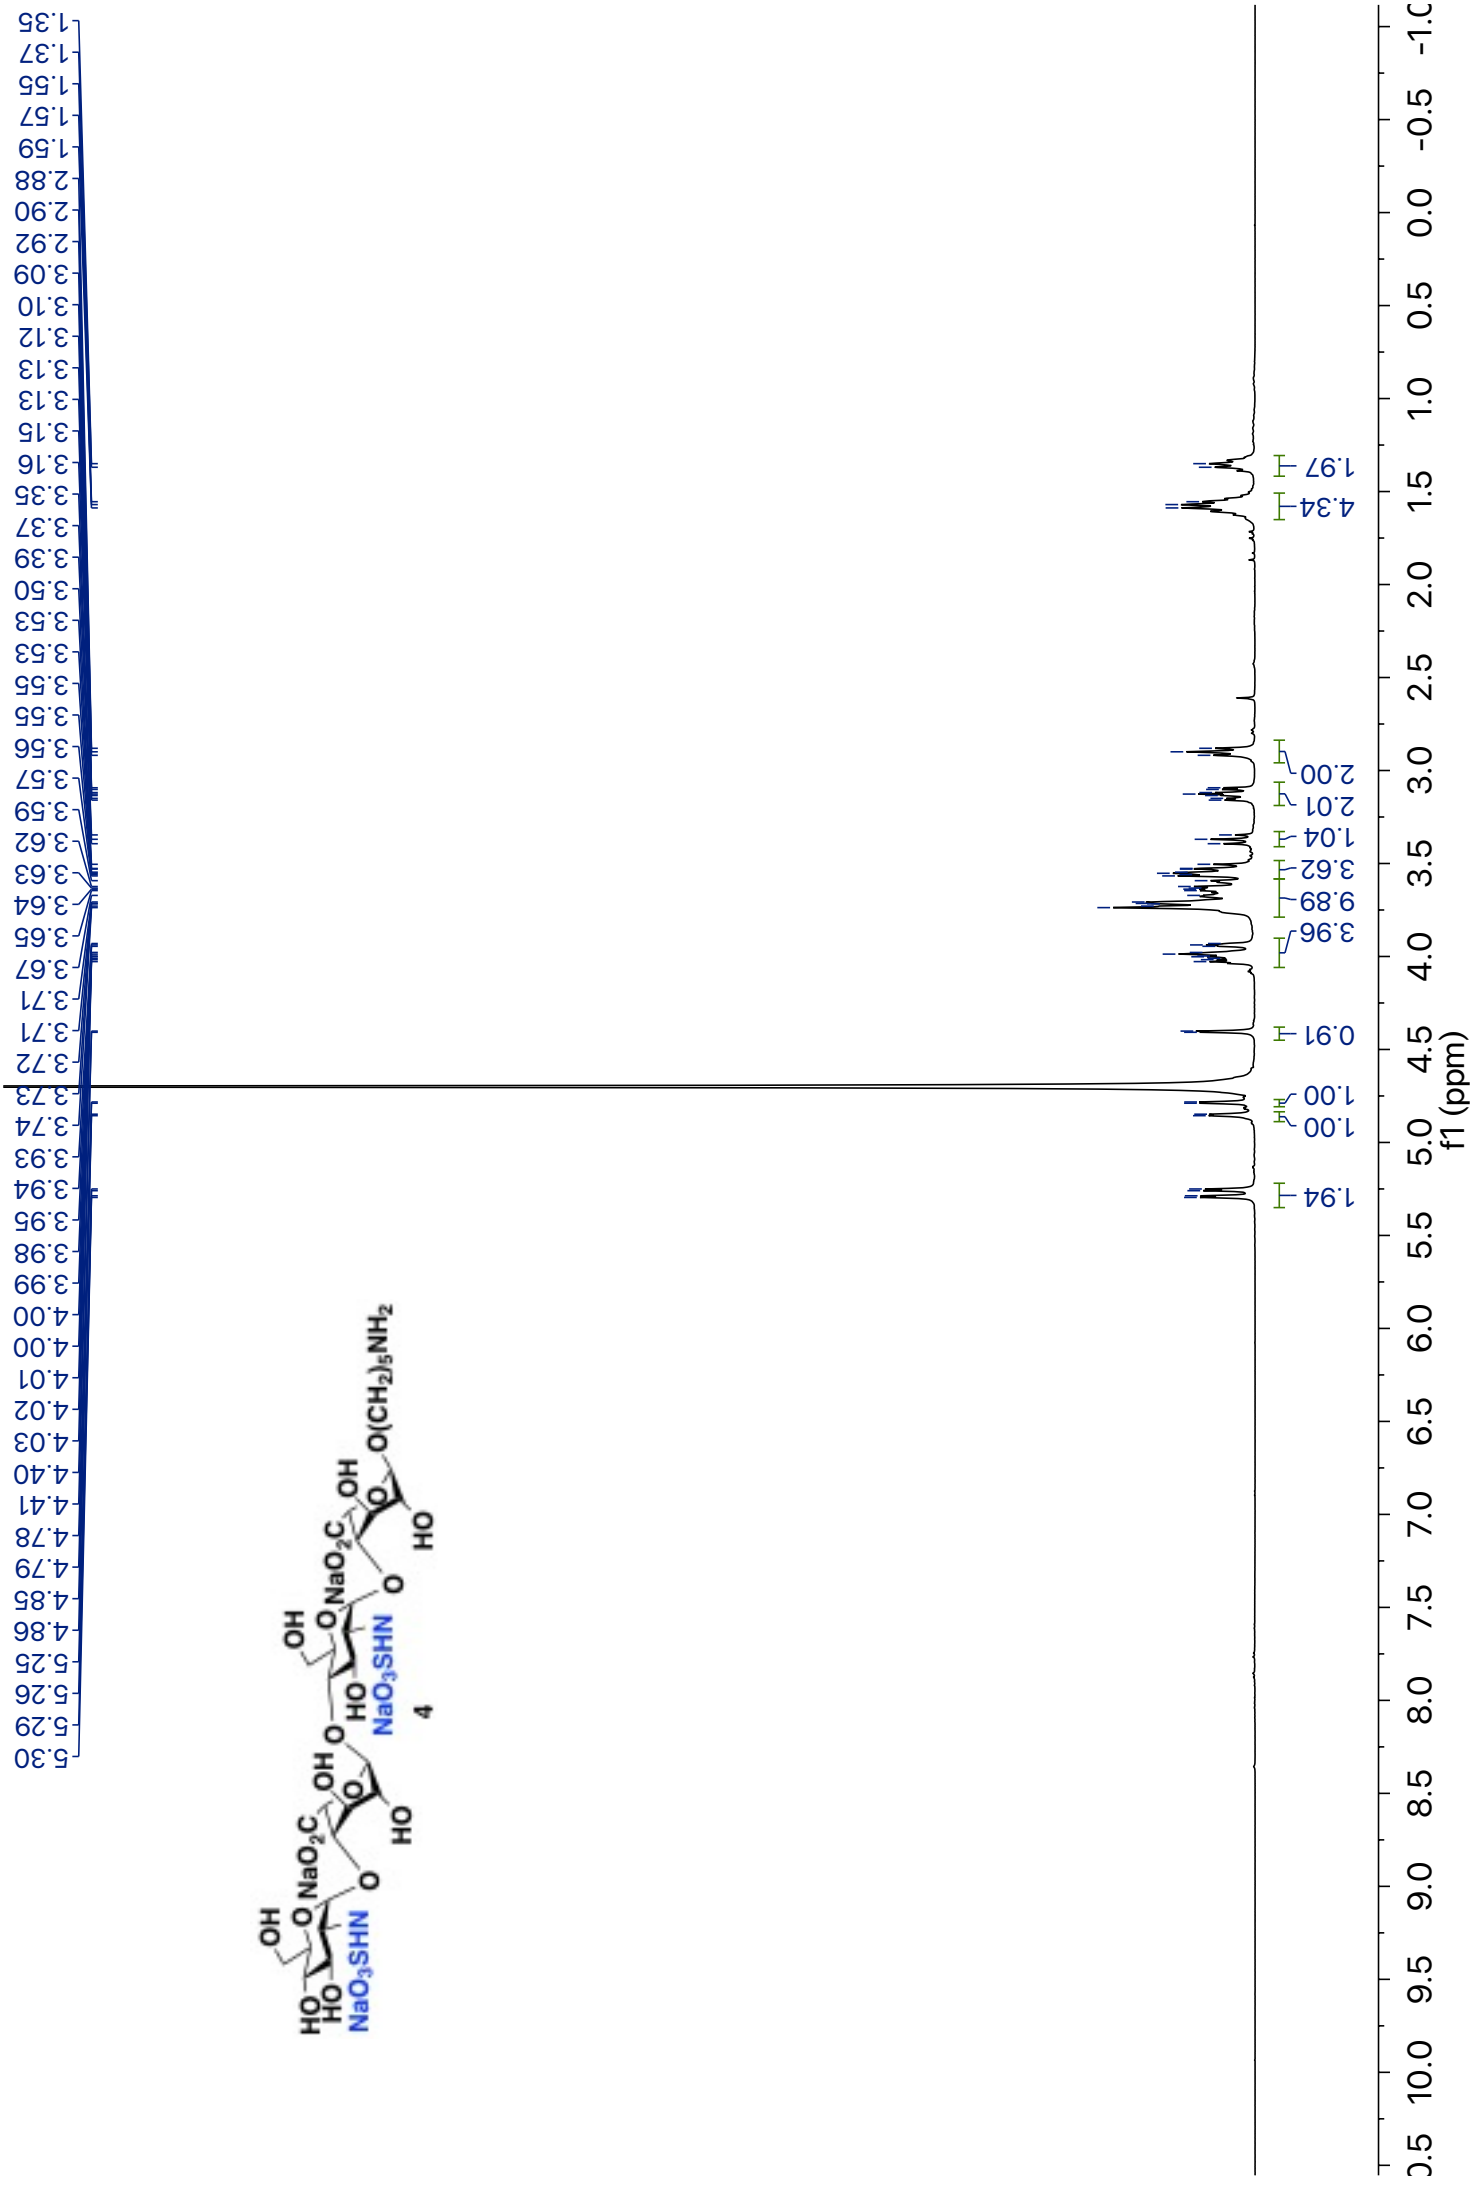

WL-2-244-None-OS-D-NS-B-NS-Prod-C-TC.1.1.r —

175.28  
175.24

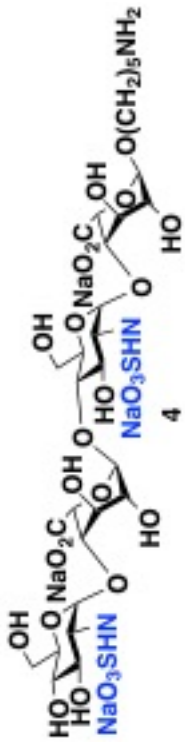

101.54  
100.70  
95.63  
95.39  
77.01  
74.76  
71.66  
71.24  
70.88  
69.72  
69.30  
68.88  
68.72  
68.06  
60.18  
59.72  
57.95  
57.82  
39.35  
27.96  
26.24  
22.23

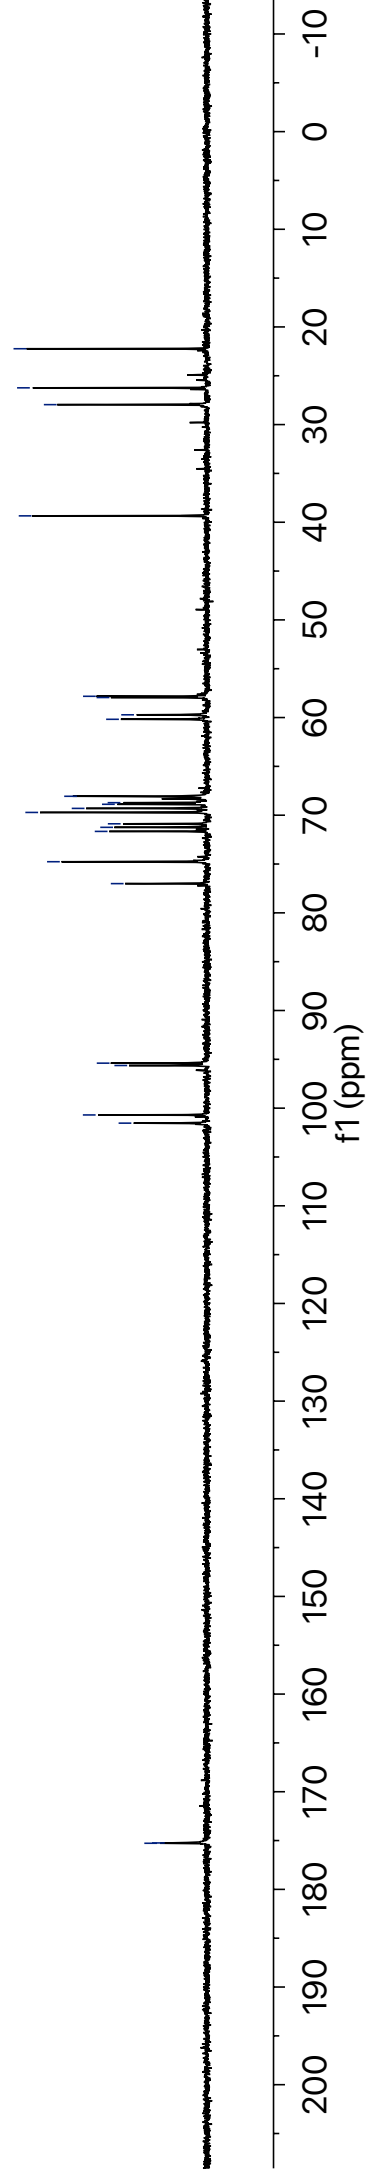

WL-2-135-D-NAC-B-NAC-A-2SO3-prod.1.1.r —

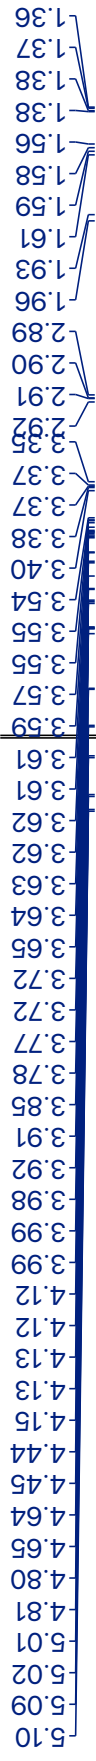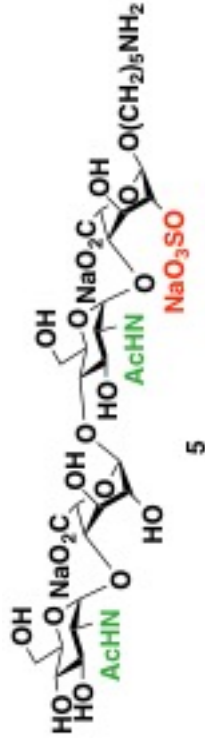

5

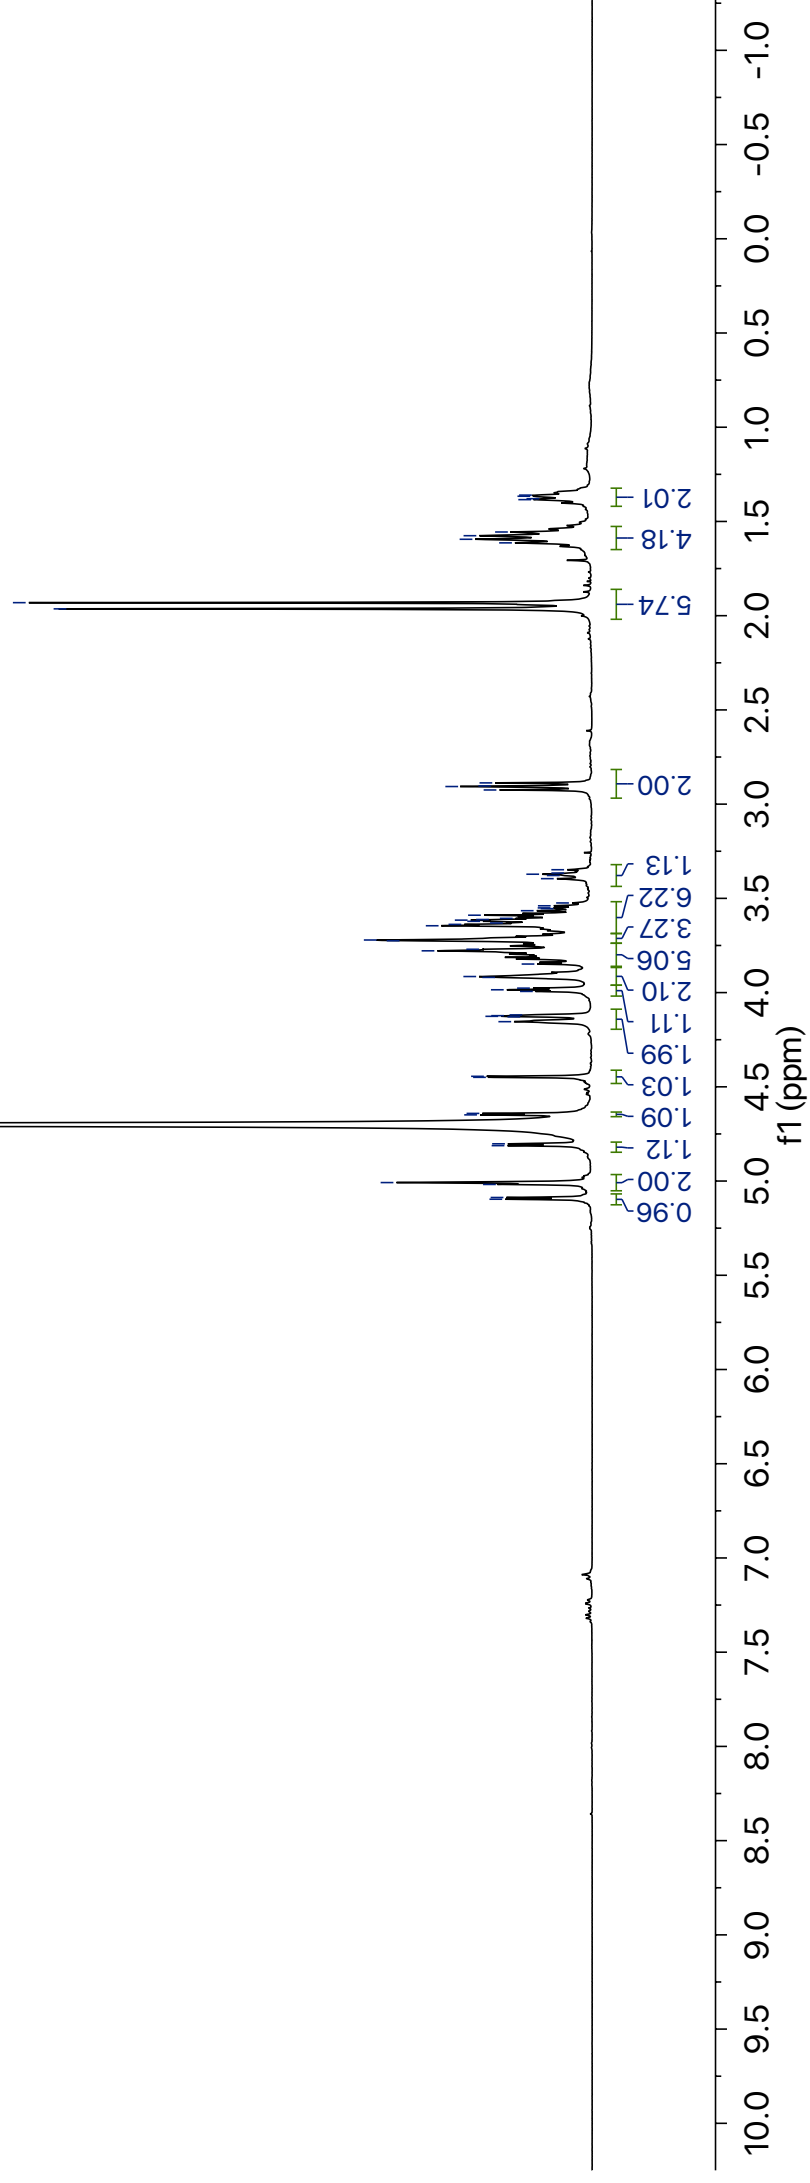

175.24  
174.92  
174.71  
174.39

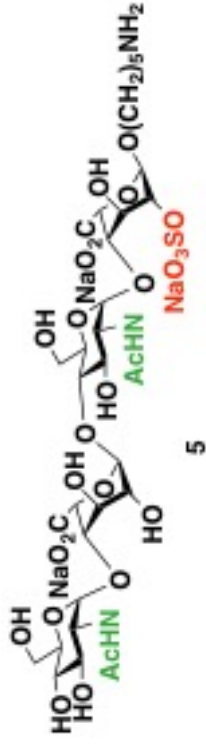

101.62  
98.48  
94.36  
93.68  
76.65  
74.35  
73.92  
71.93  
71.05  
70.93  
69.95  
69.82  
69.68  
68.08  
66.99  
64.00  
60.14  
59.70  
53.51  
39.36  
27.73  
26.24  
22.23  
22.16  
21.86

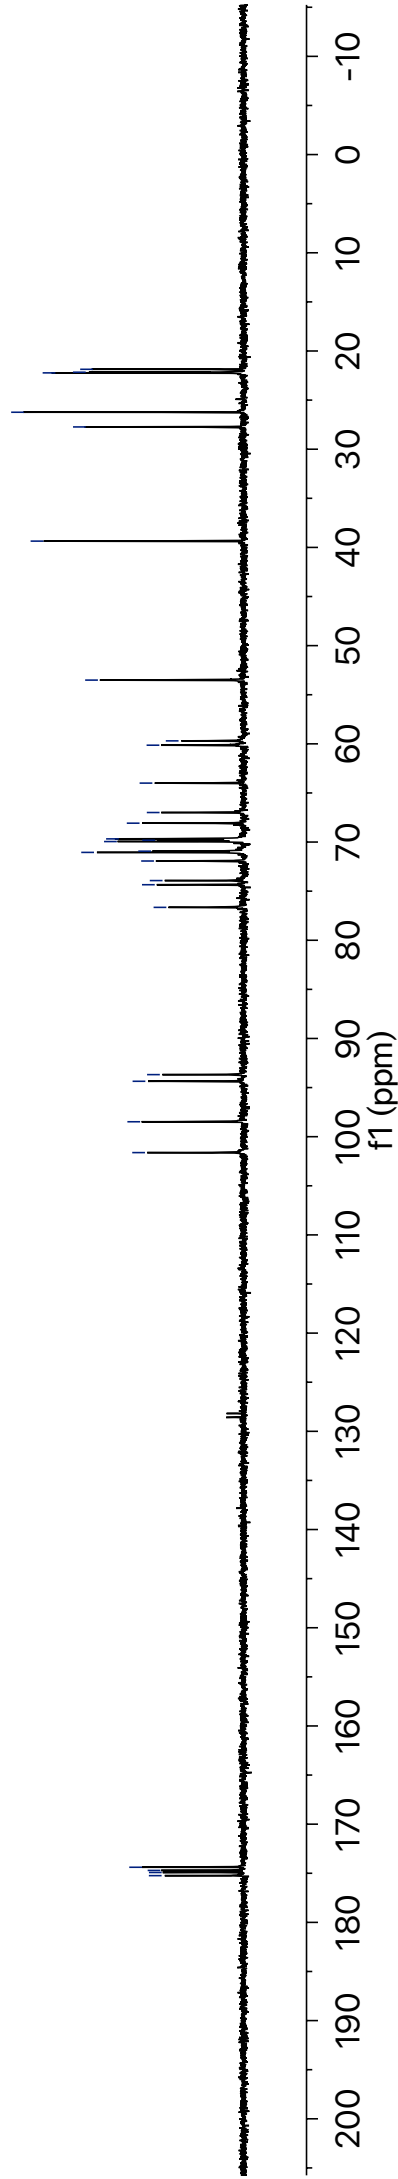

5.28  
5.27  
5.09  
5.08  
5.03  
4.82  
4.82  
4.40  
4.39  
4.14  
4.13  
4.13  
3.99  
3.98  
3.97  
3.96  
3.95  
3.85  
3.84  
3.82  
3.82  
3.81  
3.80  
3.79  
3.79  
3.73  
3.72  
3.65  
3.62  
3.62  
3.60  
3.60  
3.59  
3.58  
3.57  
3.56  
3.55  
3.55  
3.54  
3.40  
3.38  
3.37  
3.37  
3.35  
3.17  
3.16  
3.15  
3.14  
2.92  
2.91  
2.89  
1.93  
1.59  
1.59  
1.57  
1.39  
1.37  
1.36

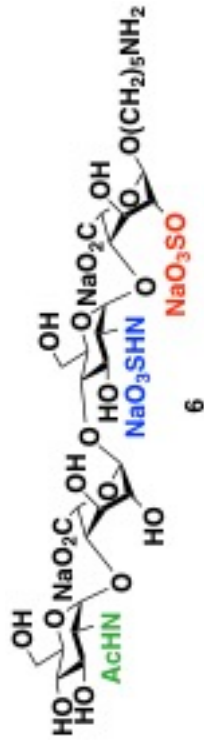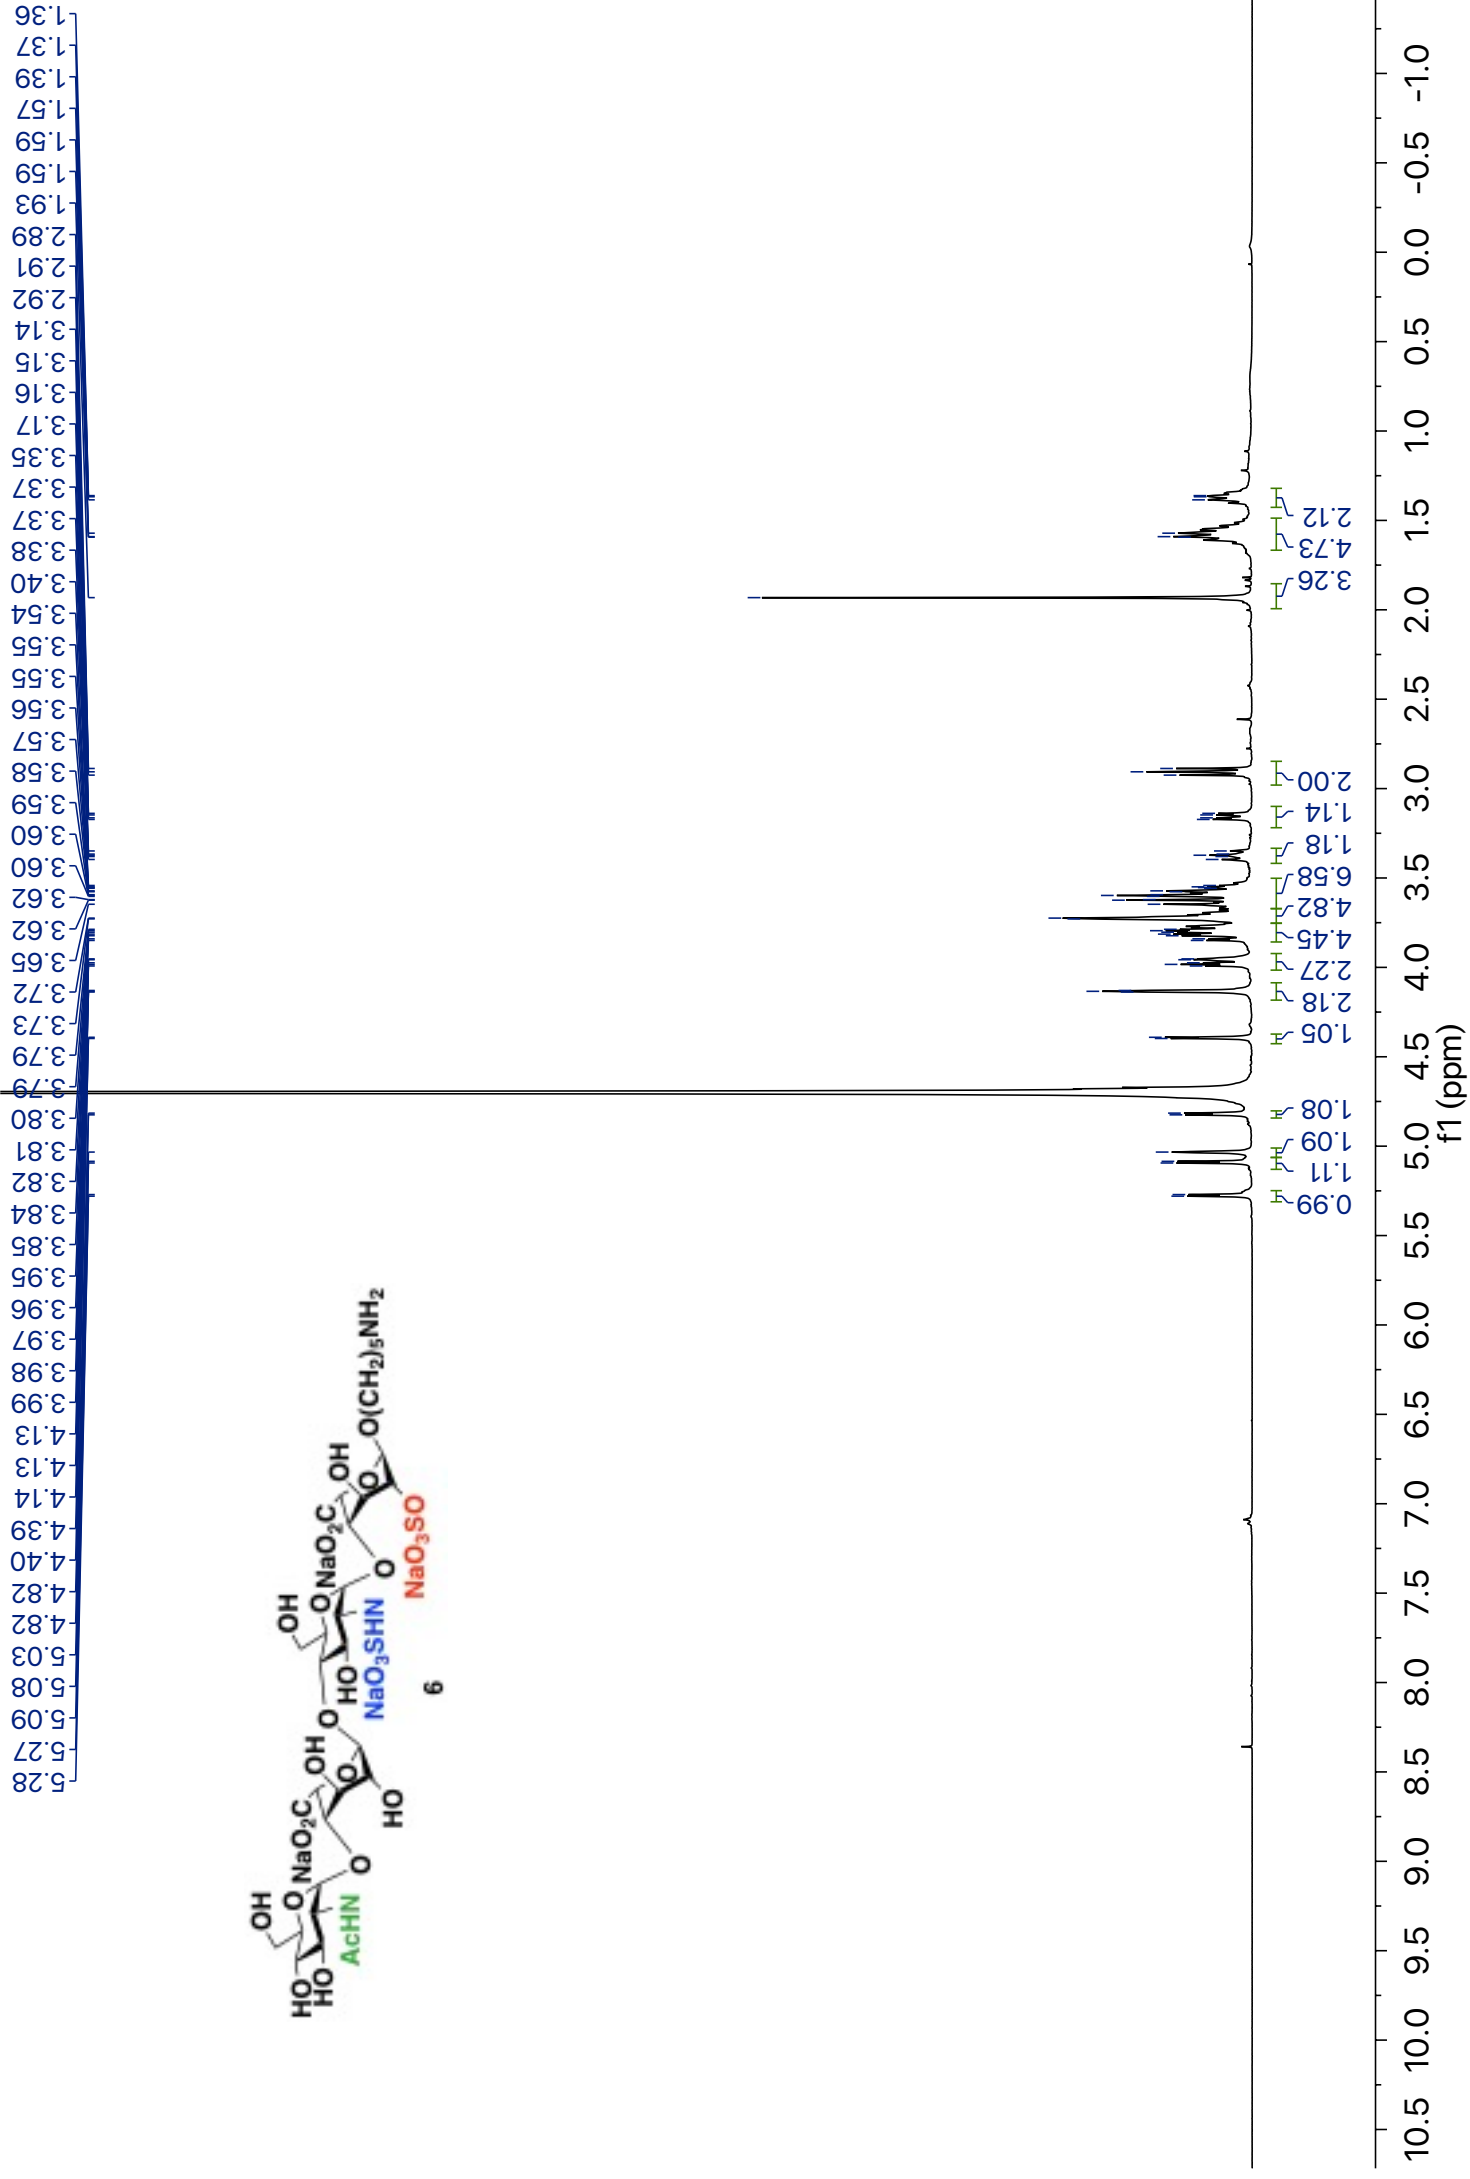

WL-2-131-C.3.1.1r

175.02  
174.91  
174.39

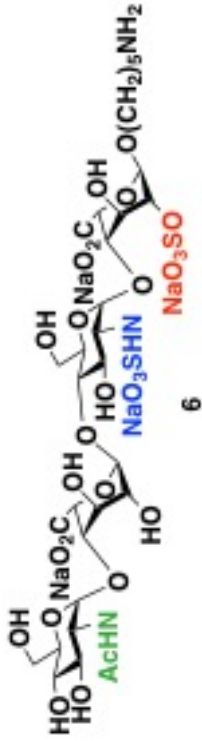

101.42  
98.72  
96.92  
94.40  
76.79  
75.94  
75.90  
74.30  
71.92  
71.07  
70.90  
69.94  
69.90  
69.68  
69.55  
69.47  
68.60  
68.38  
68.03  
60.14  
59.77  
58.16  
53.53  
39.38  
27.77  
26.20  
22.18  
21.88

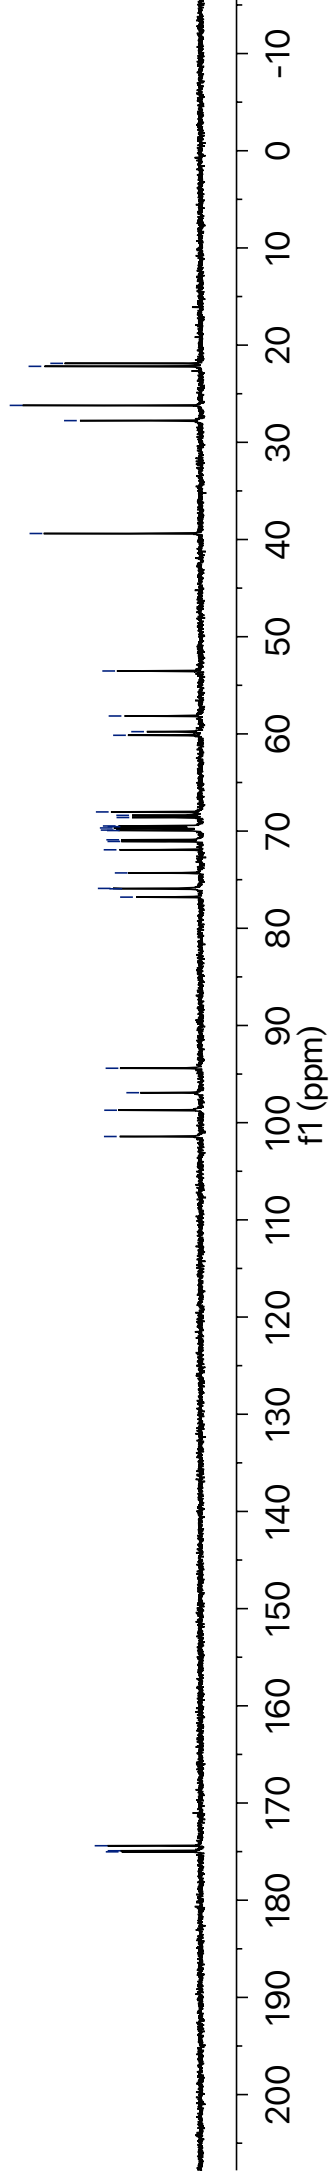

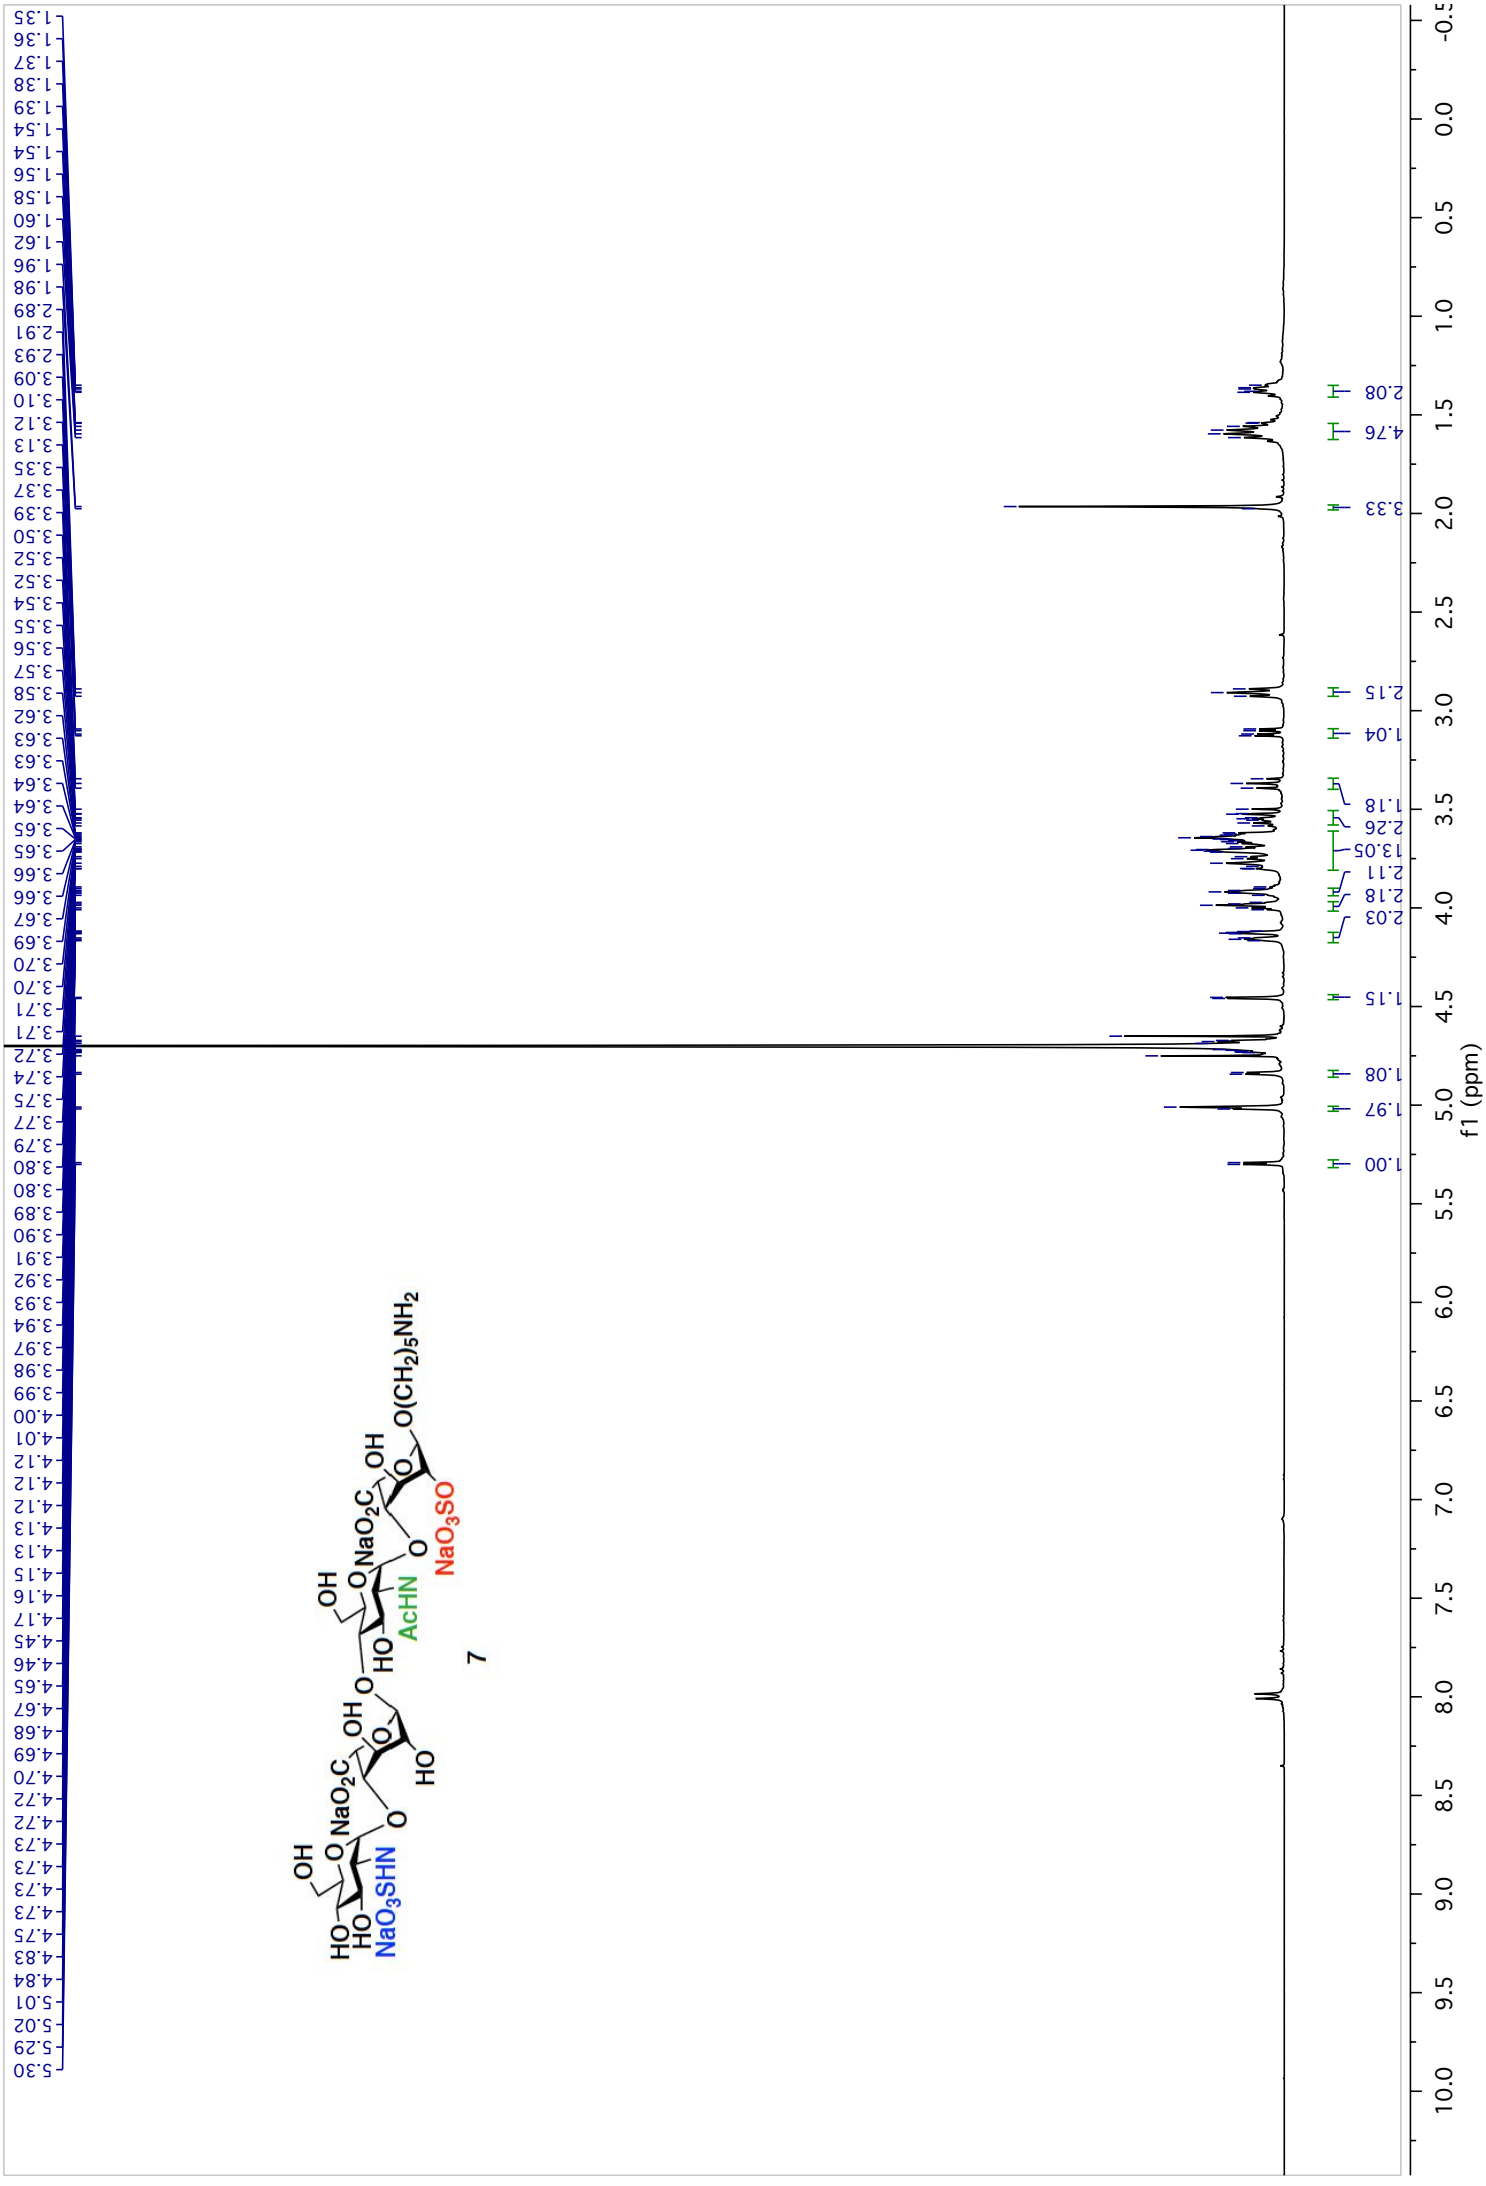



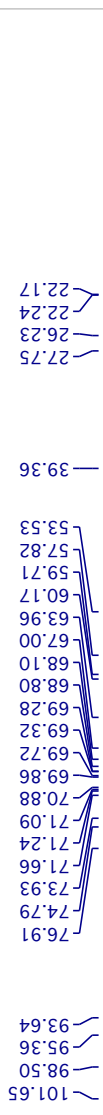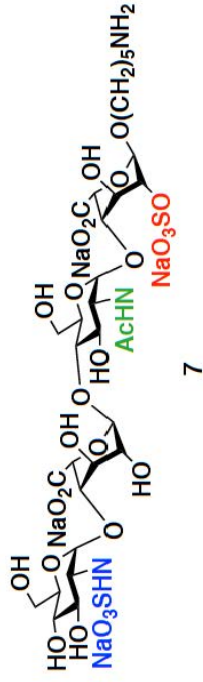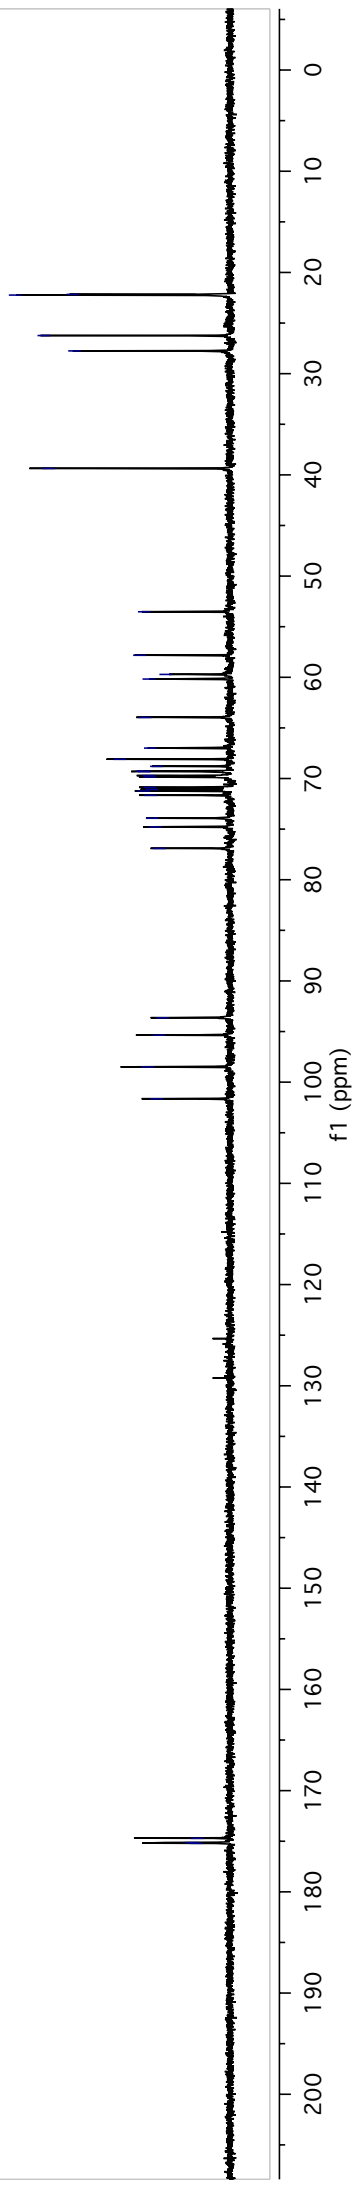

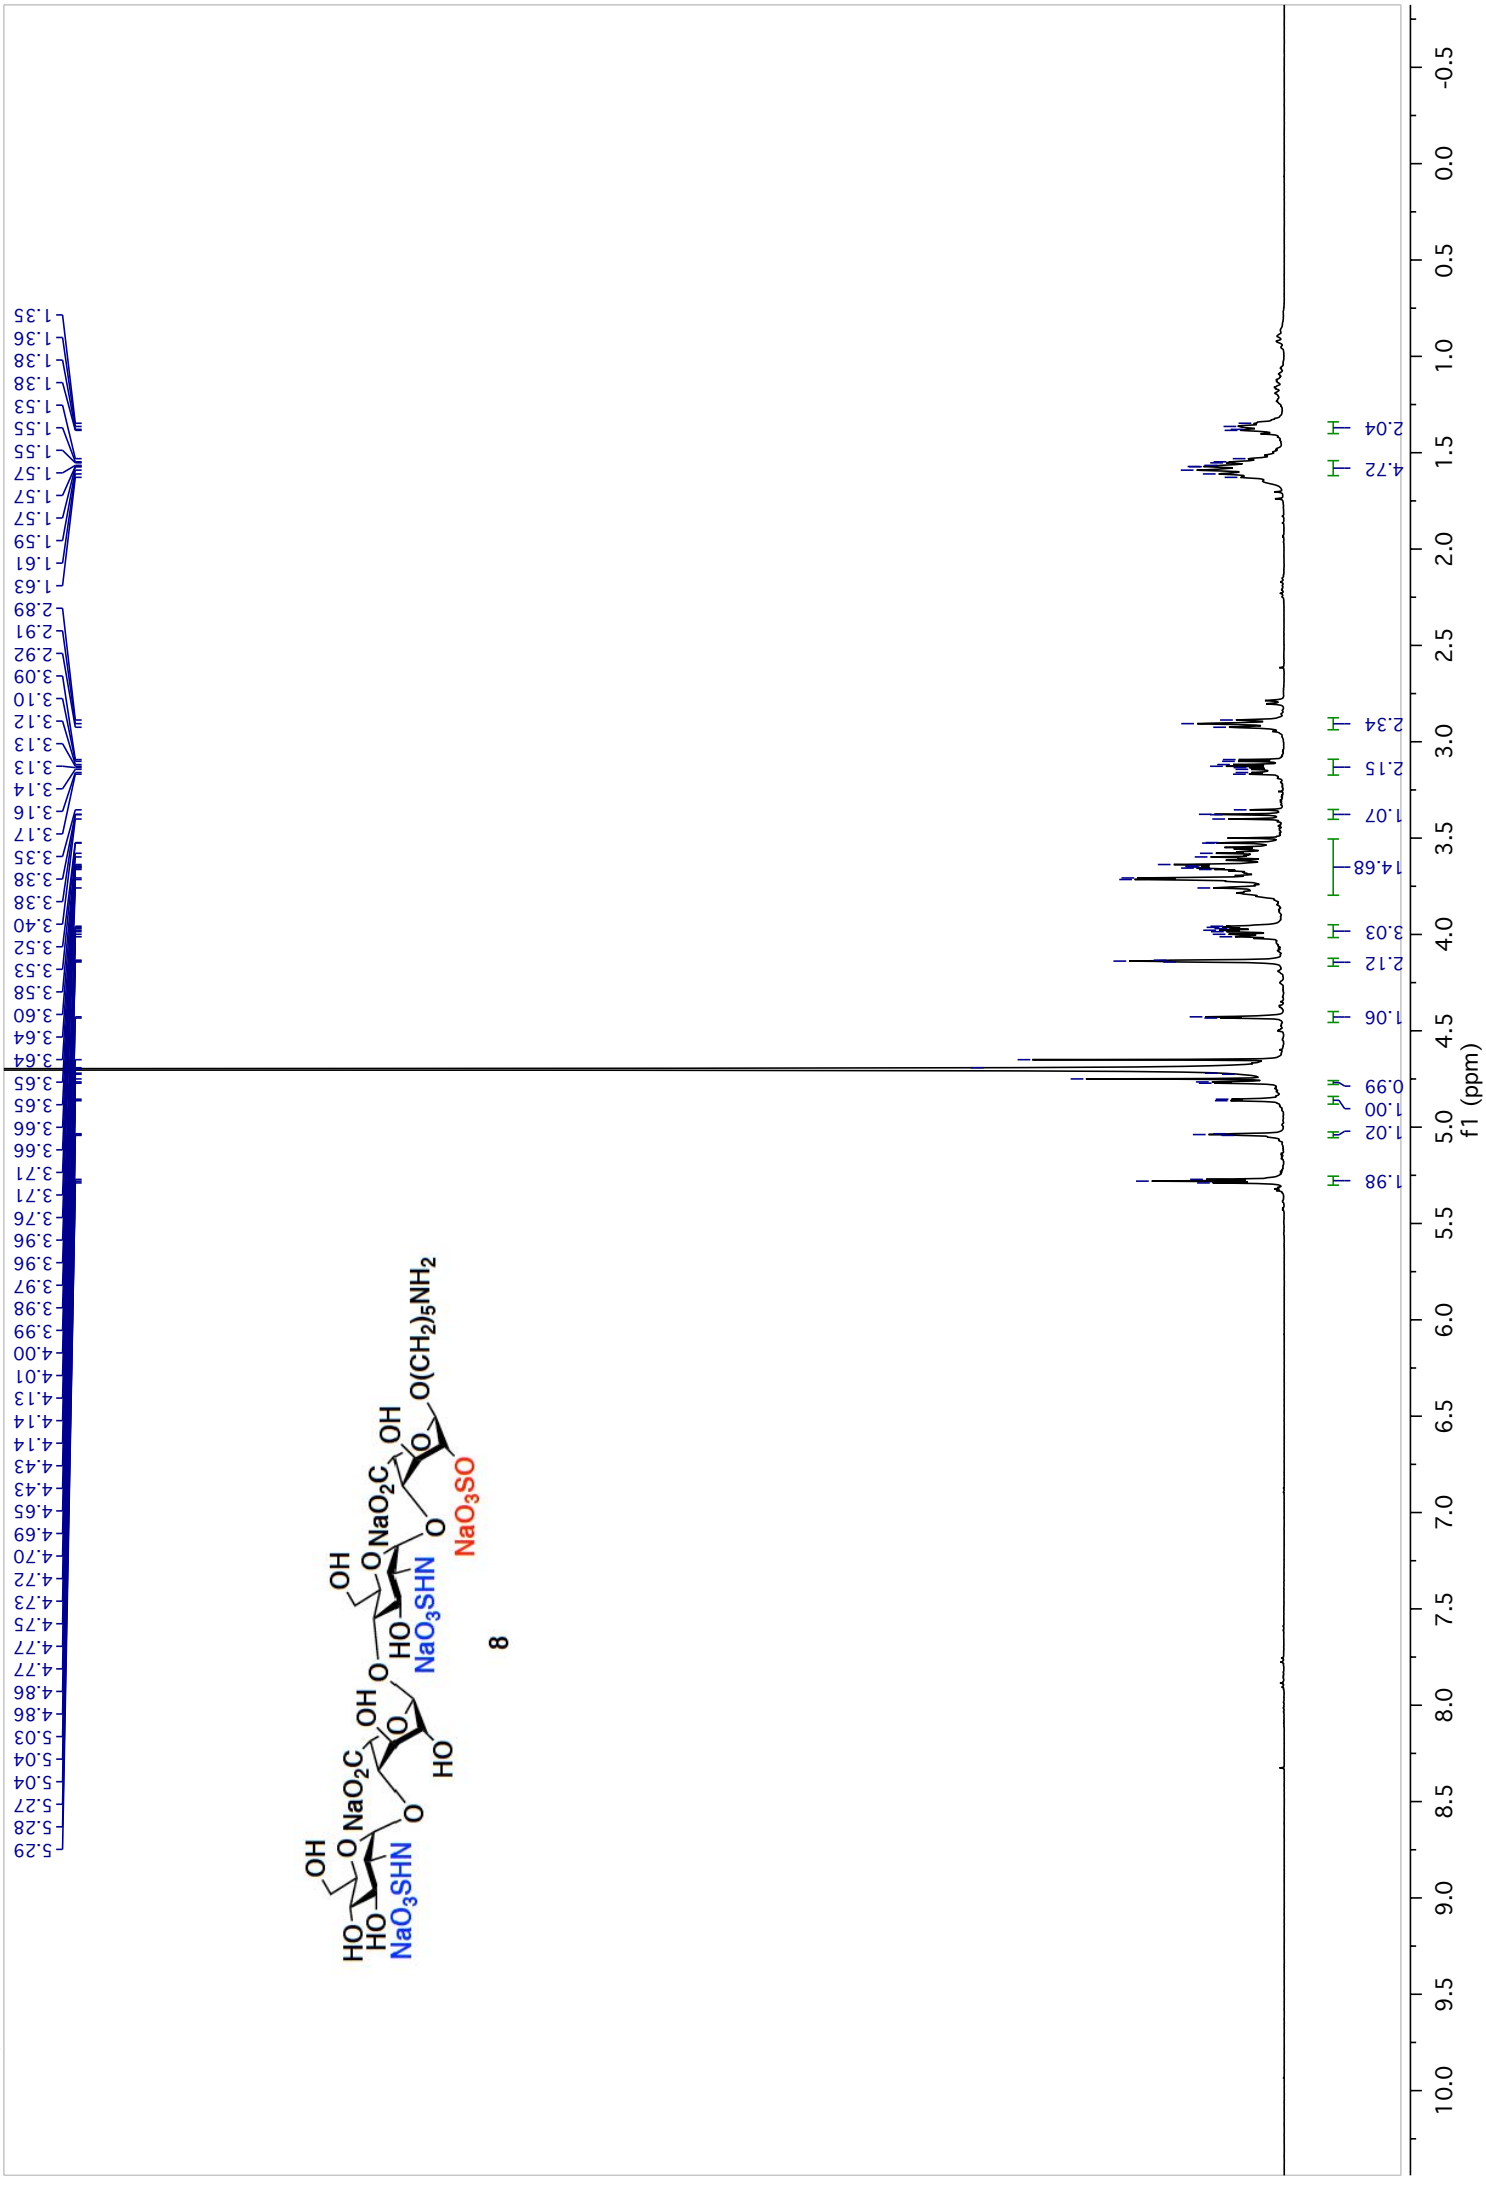

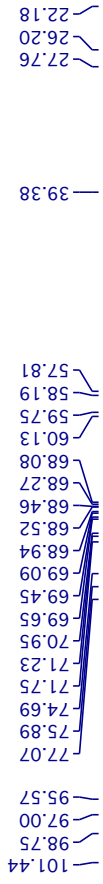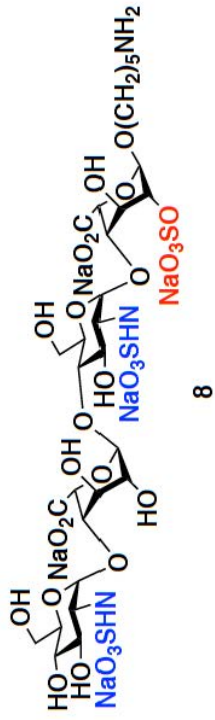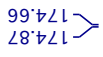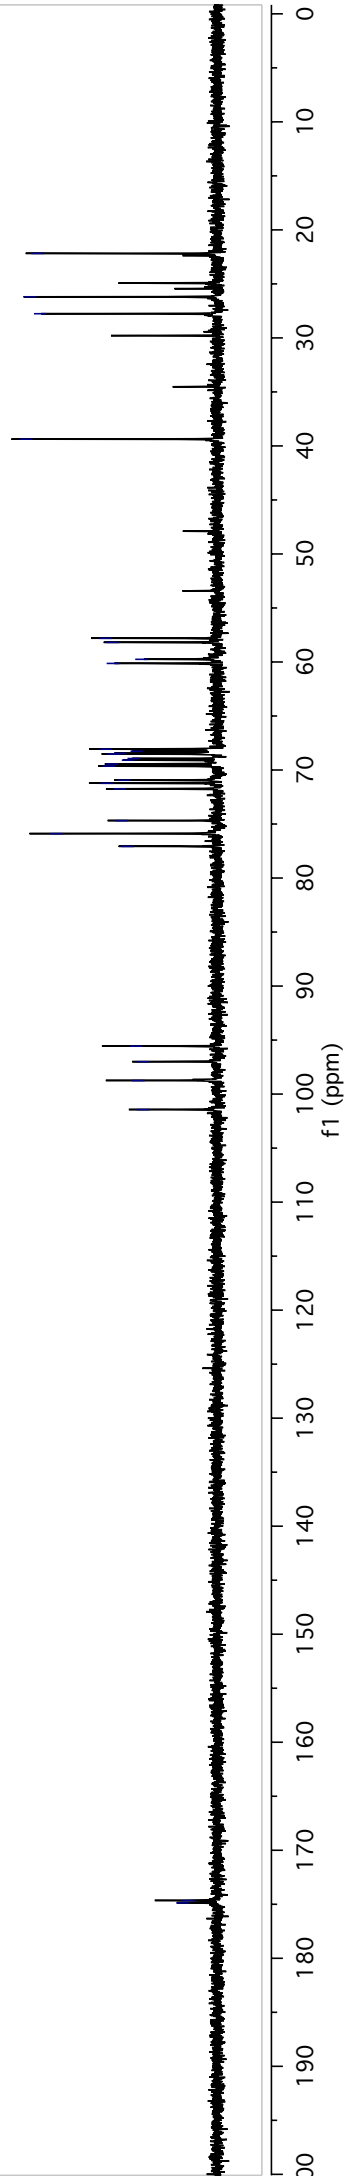

WL-2-167-D-NAC-B-NAC-6SO3-H-TC.1.1.r —

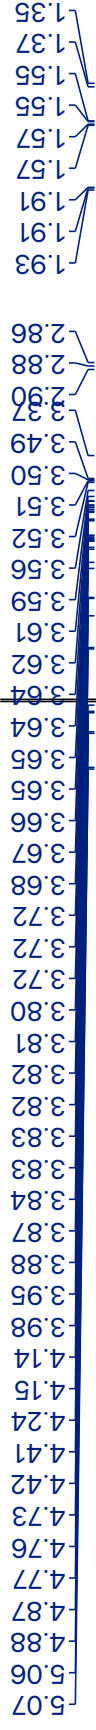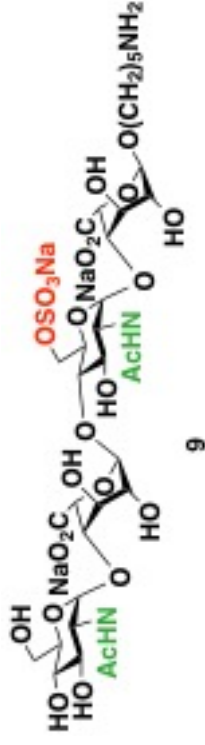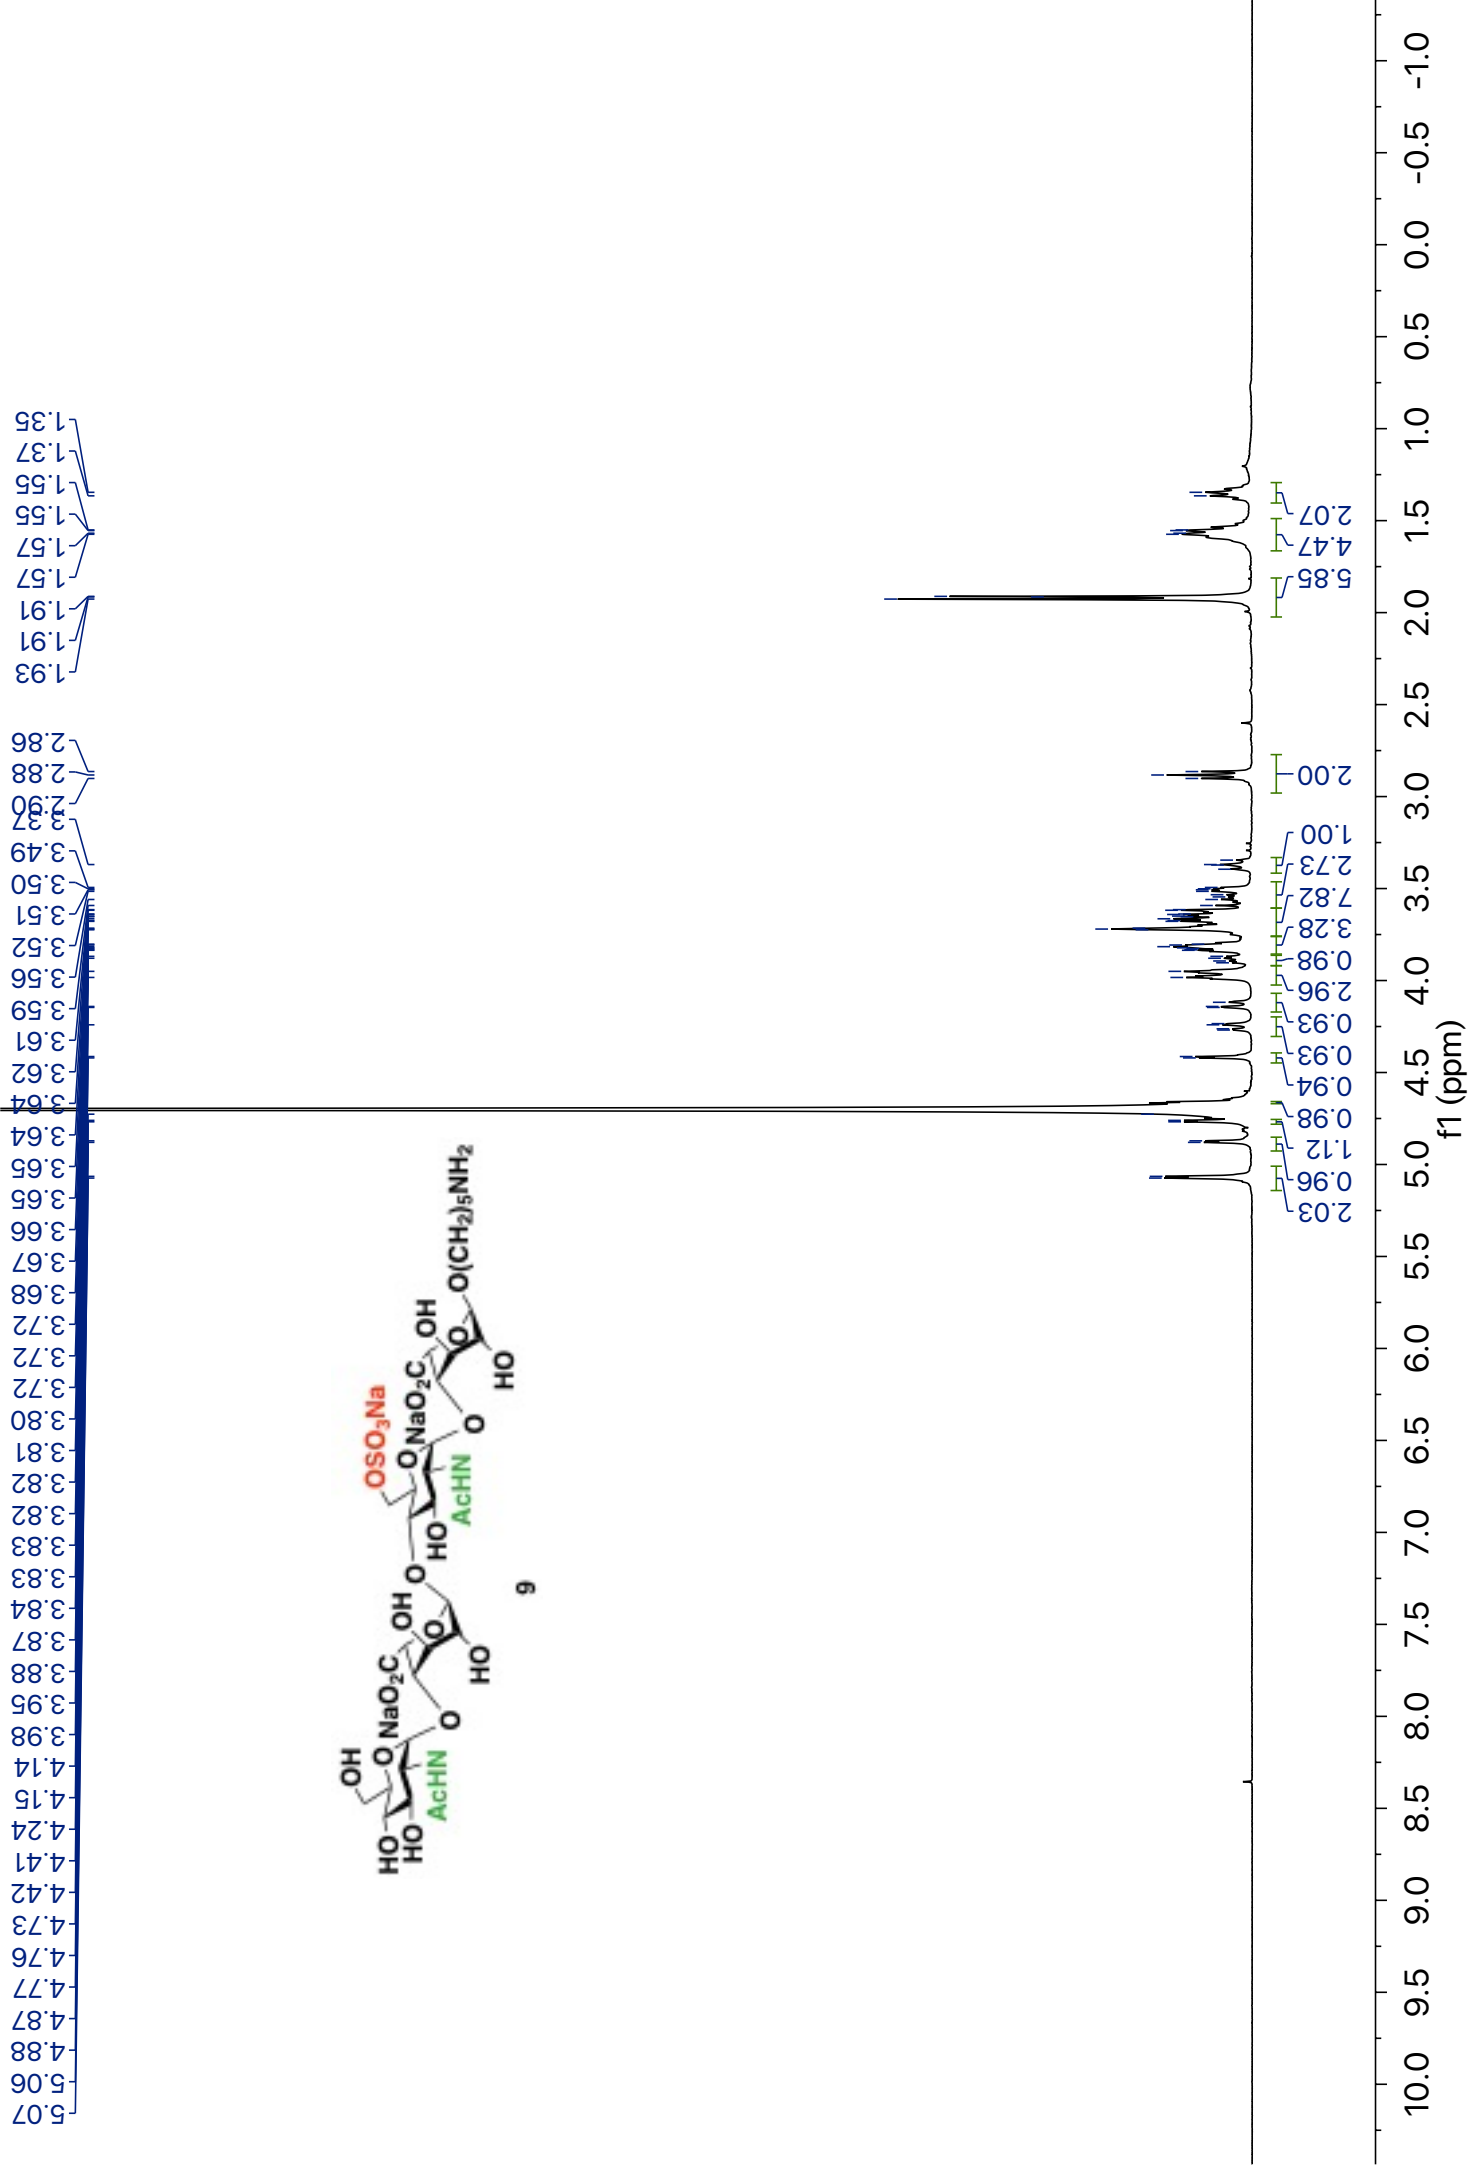

WL-2-167-D-NAC-B-NAC-6SO3-C-TC.1.1.r —

175.01  
174.98  
174.45  
174.26

101.89  
100.75  
94.45  
94.28  
76.76  
73.95  
71.90  
71.09  
69.84  
69.63  
69.52  
69.44  
69.31  
69.18  
69.00  
68.73  
68.51  
68.07  
66.15  
60.13  
53.52  
39.38  
28.02  
26.32  
22.26  
21.89

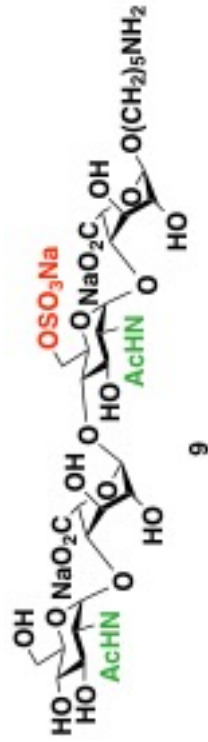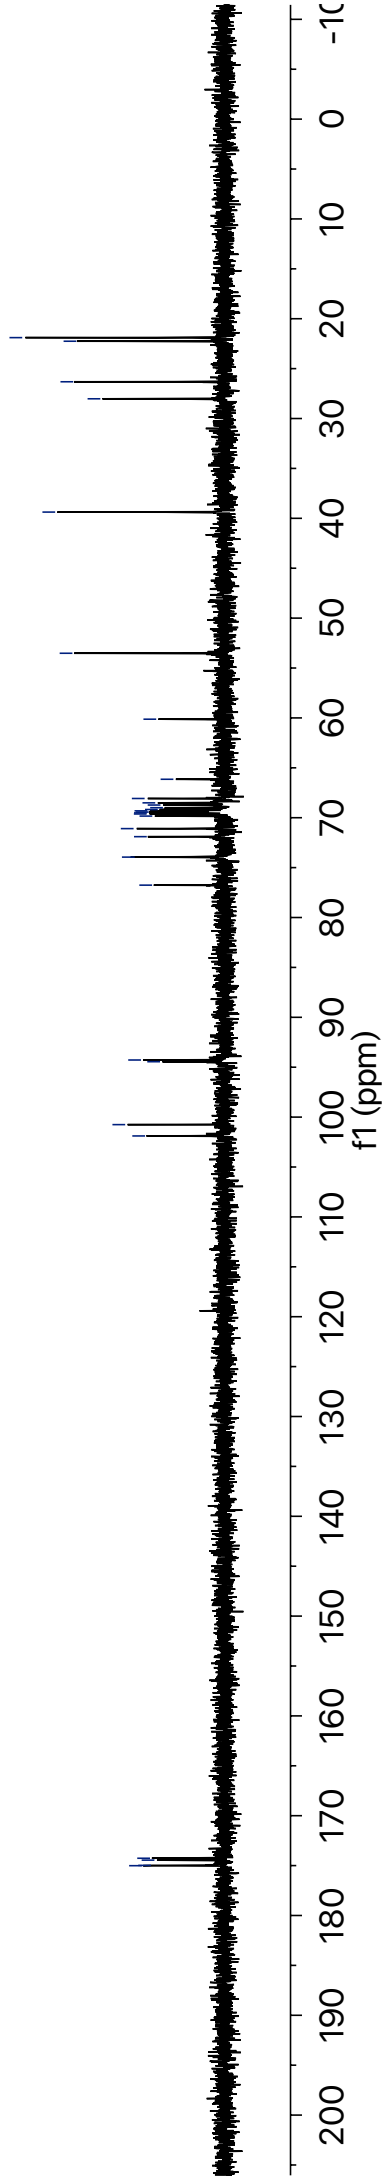



WL-2-168-D-NAC-B-NS-6S-C-TC.1.1.1r —

175.25  
175.14  
174.45

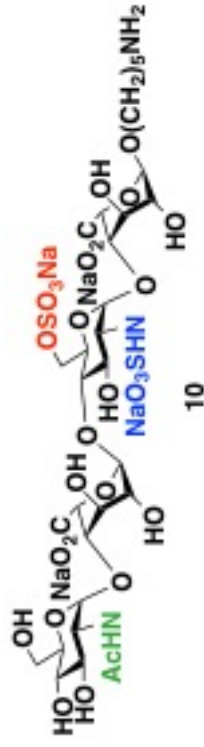

101.75  
100.68  
95.59  
94.29  
76.81  
74.78  
73.89  
71.89  
71.11  
69.82  
69.63  
69.42  
69.36  
68.96  
68.85  
68.82  
68.27  
68.04  
68.01  
66.19  
60.13  
57.80  
53.53  
48.83  
39.35

27.96  
26.22  
22.24  
21.91

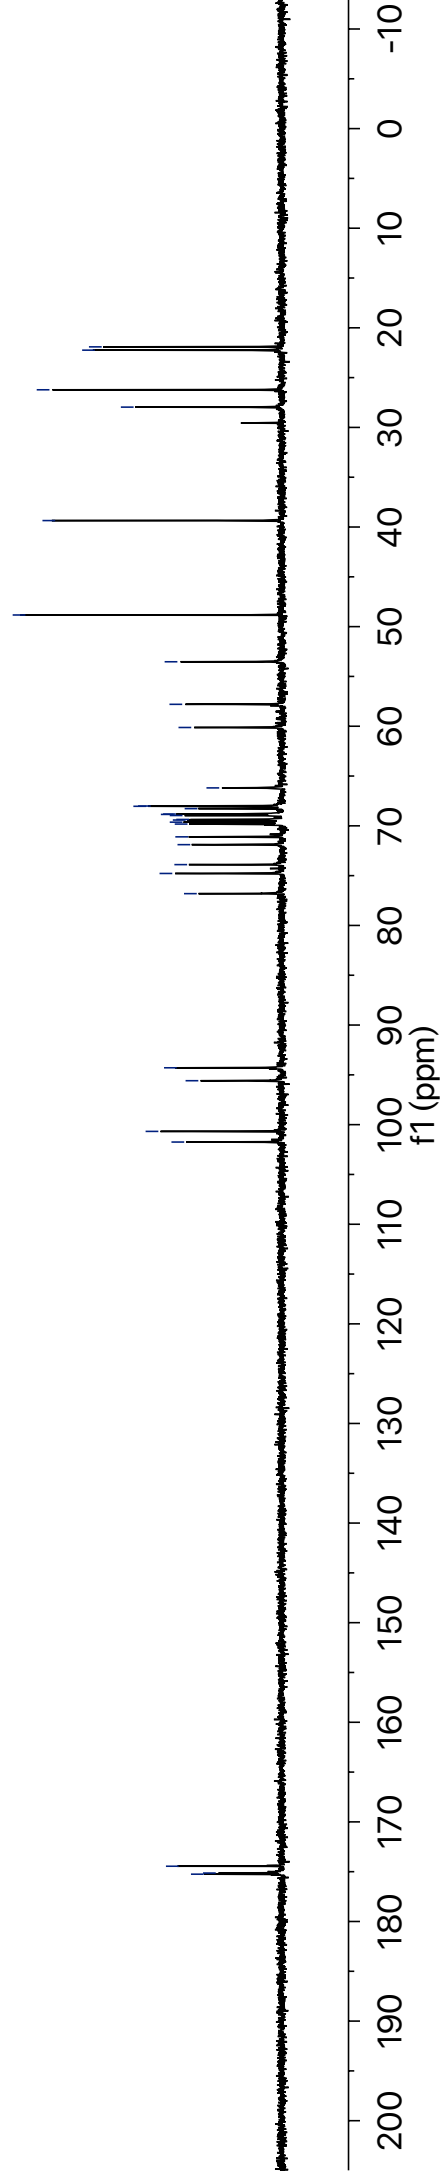

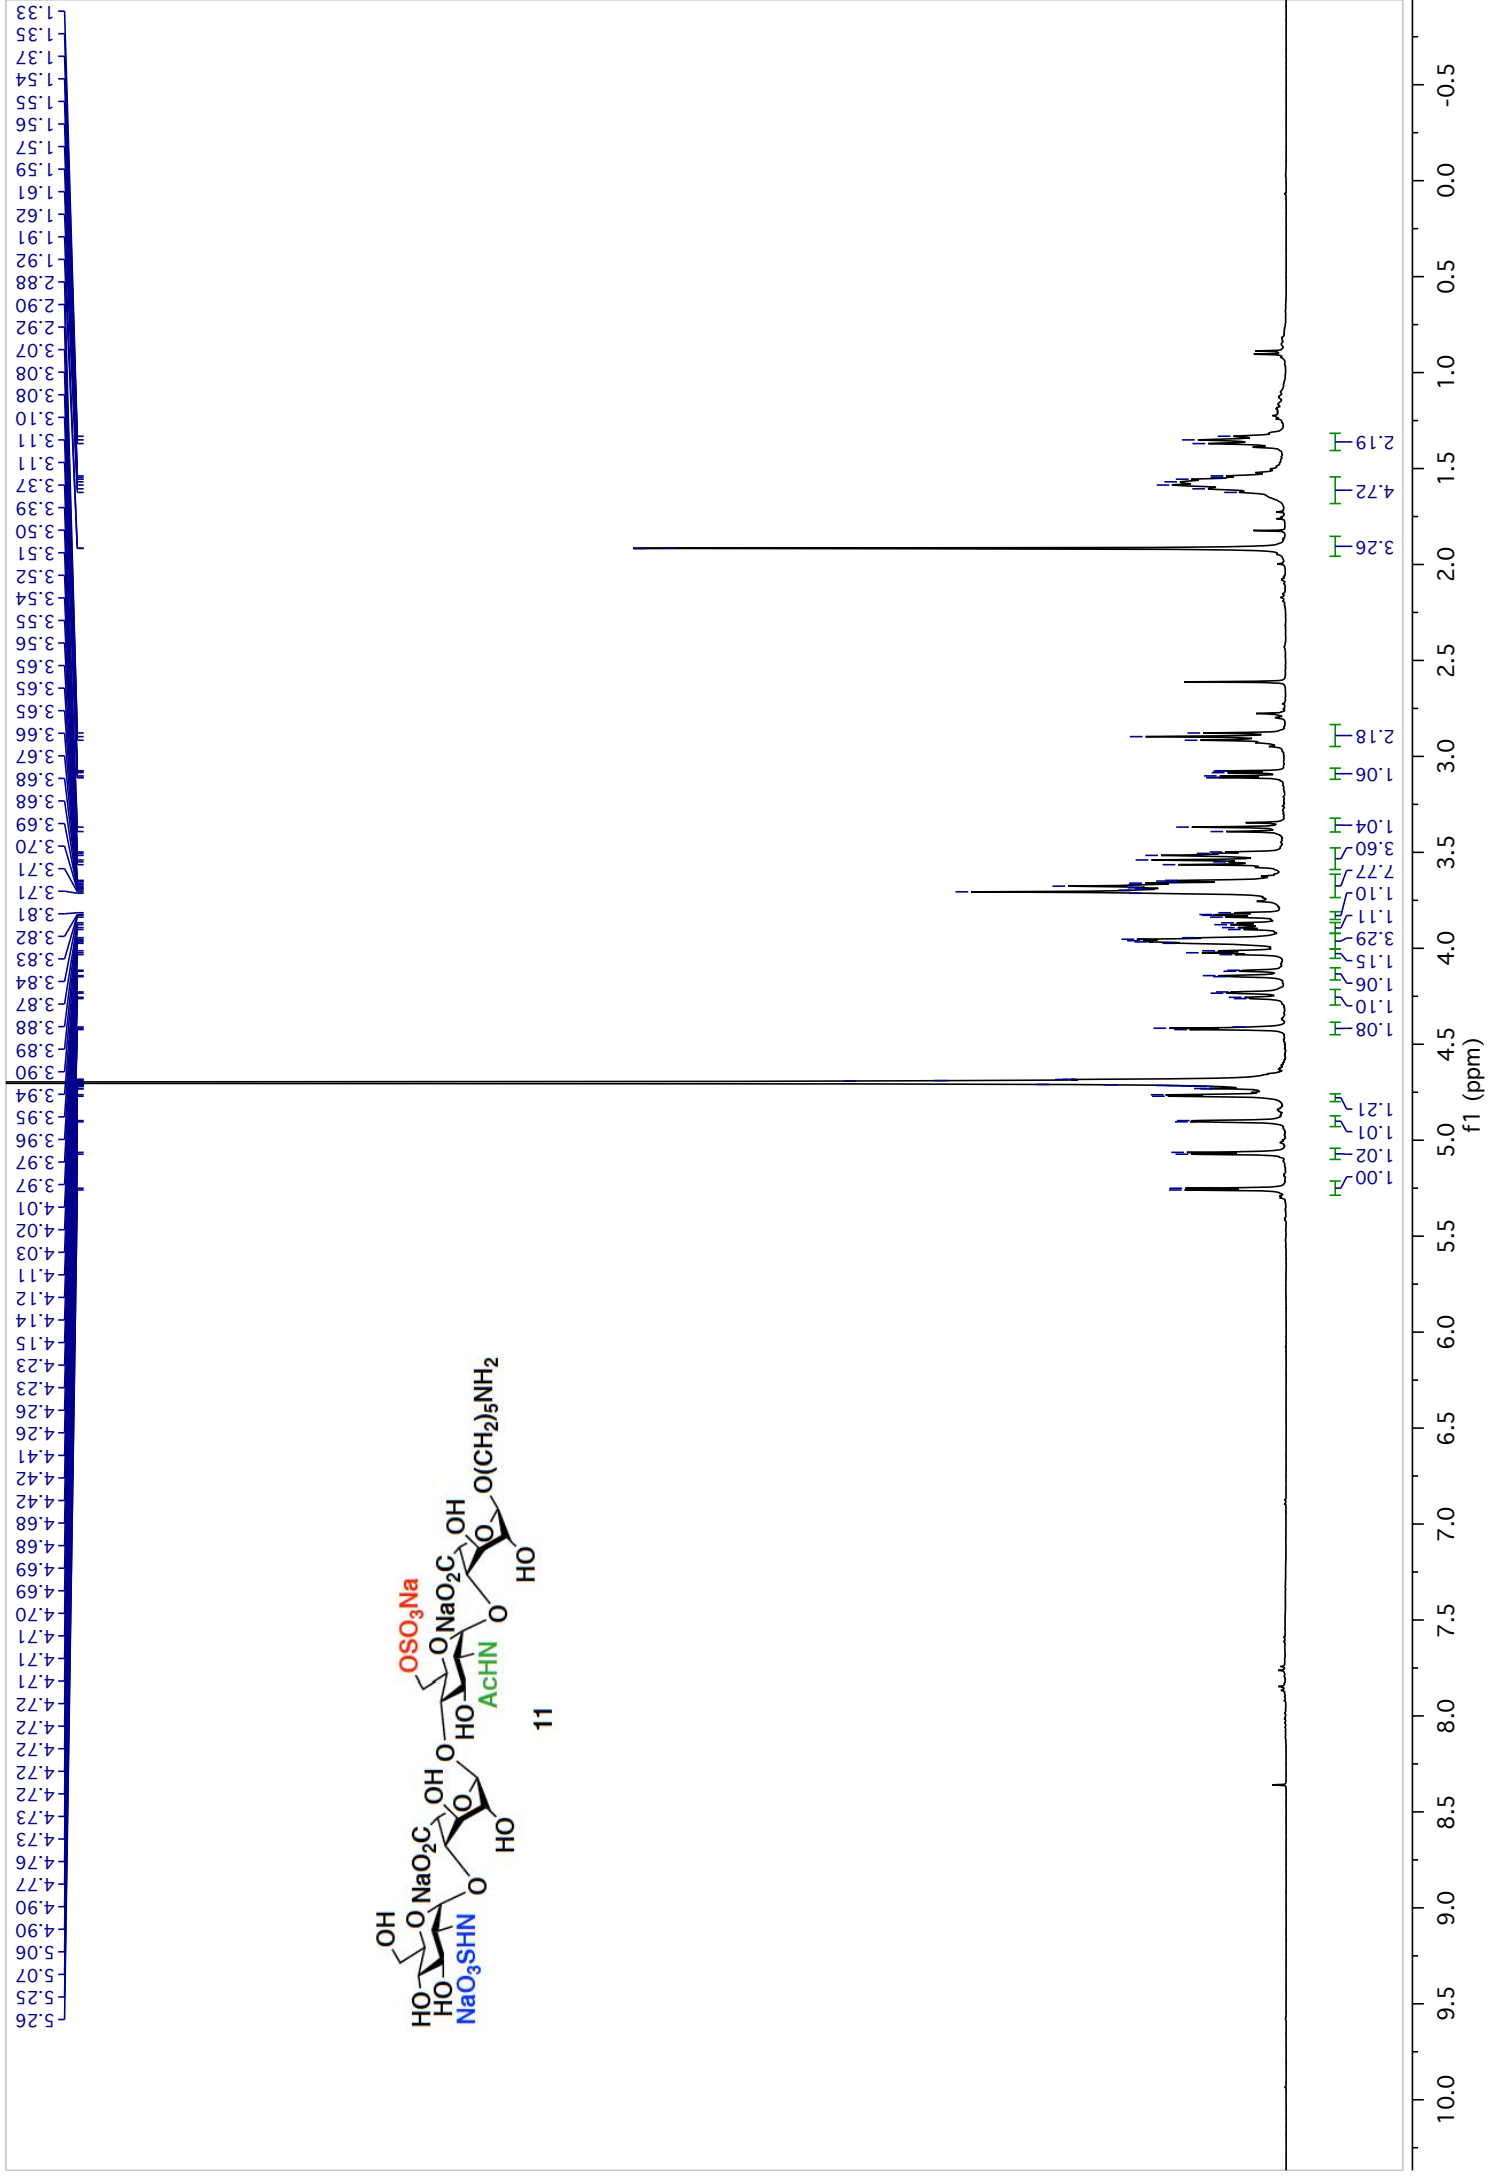



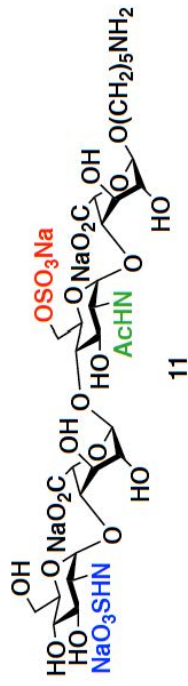

102.06  
100.77  
95.52  
94.47  
77.37  
74.37  
73.97  
71.63  
71.26  
69.87  
69.69  
69.35  
69.18  
68.78  
68.69  
68.64  
68.58  
68.08  
67.90  
66.20  
60.15  
57.85  
53.57  
39.36  
28.02  
26.21  
22.25  
21.90

175.40  
174.97  
174.28

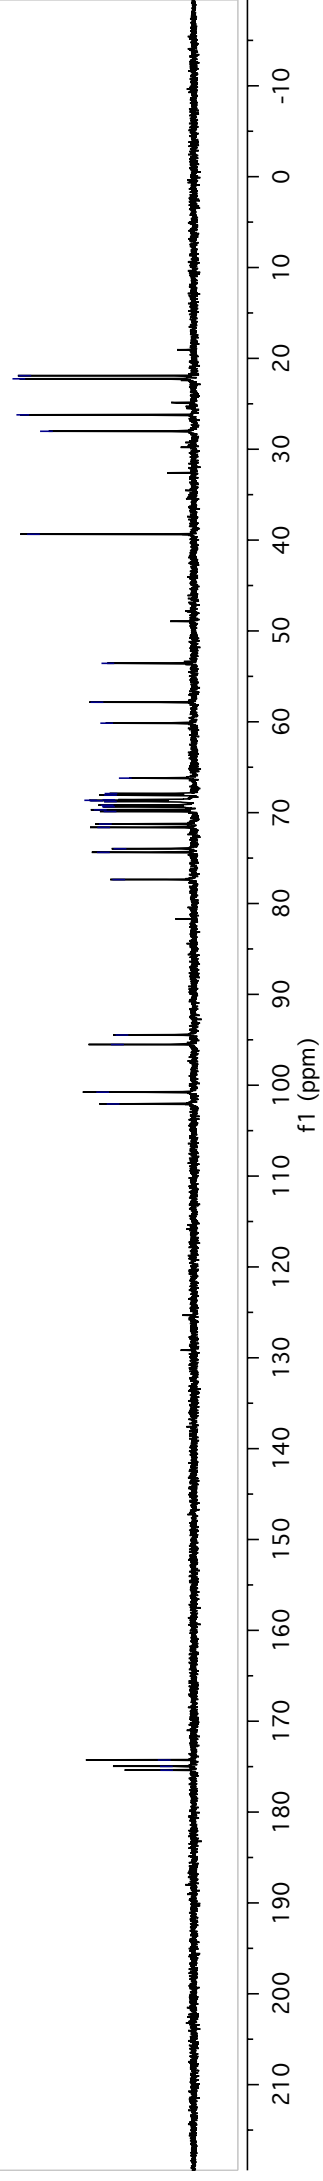



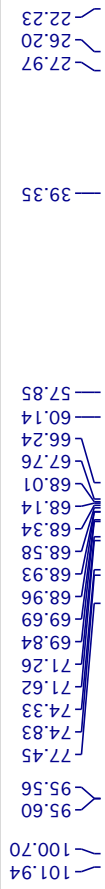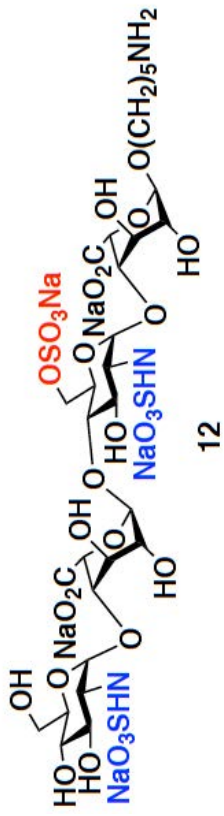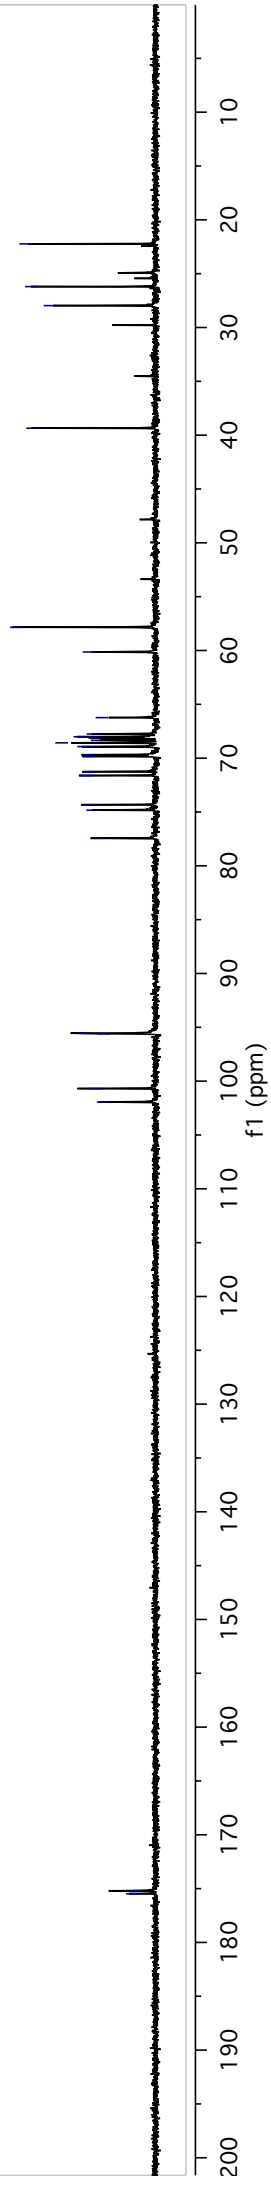

WL-2-171-1.1.1.1r

5.09  
5.07  
5.06  
5.02  
5.01  
4.81  
4.81  
4.80  
4.76  
4.75  
4.41  
4.40  
4.23  
4.23  
4.22  
4.19  
3.93  
3.92  
3.89  
3.87  
3.86  
3.84  
3.83  
3.76  
3.71  
3.71  
3.69  
3.68  
3.66  
3.64  
3.62  
3.59  
3.59  
3.57  
3.56  
3.51  
3.50  
3.50  
3.49  
3.38  
3.36  
3.34  
2.91  
2.89  
2.87  
1.96  
1.91  
1.58  
1.57  
1.57  
1.36  
1.34

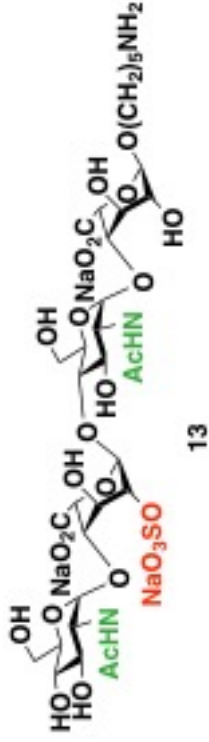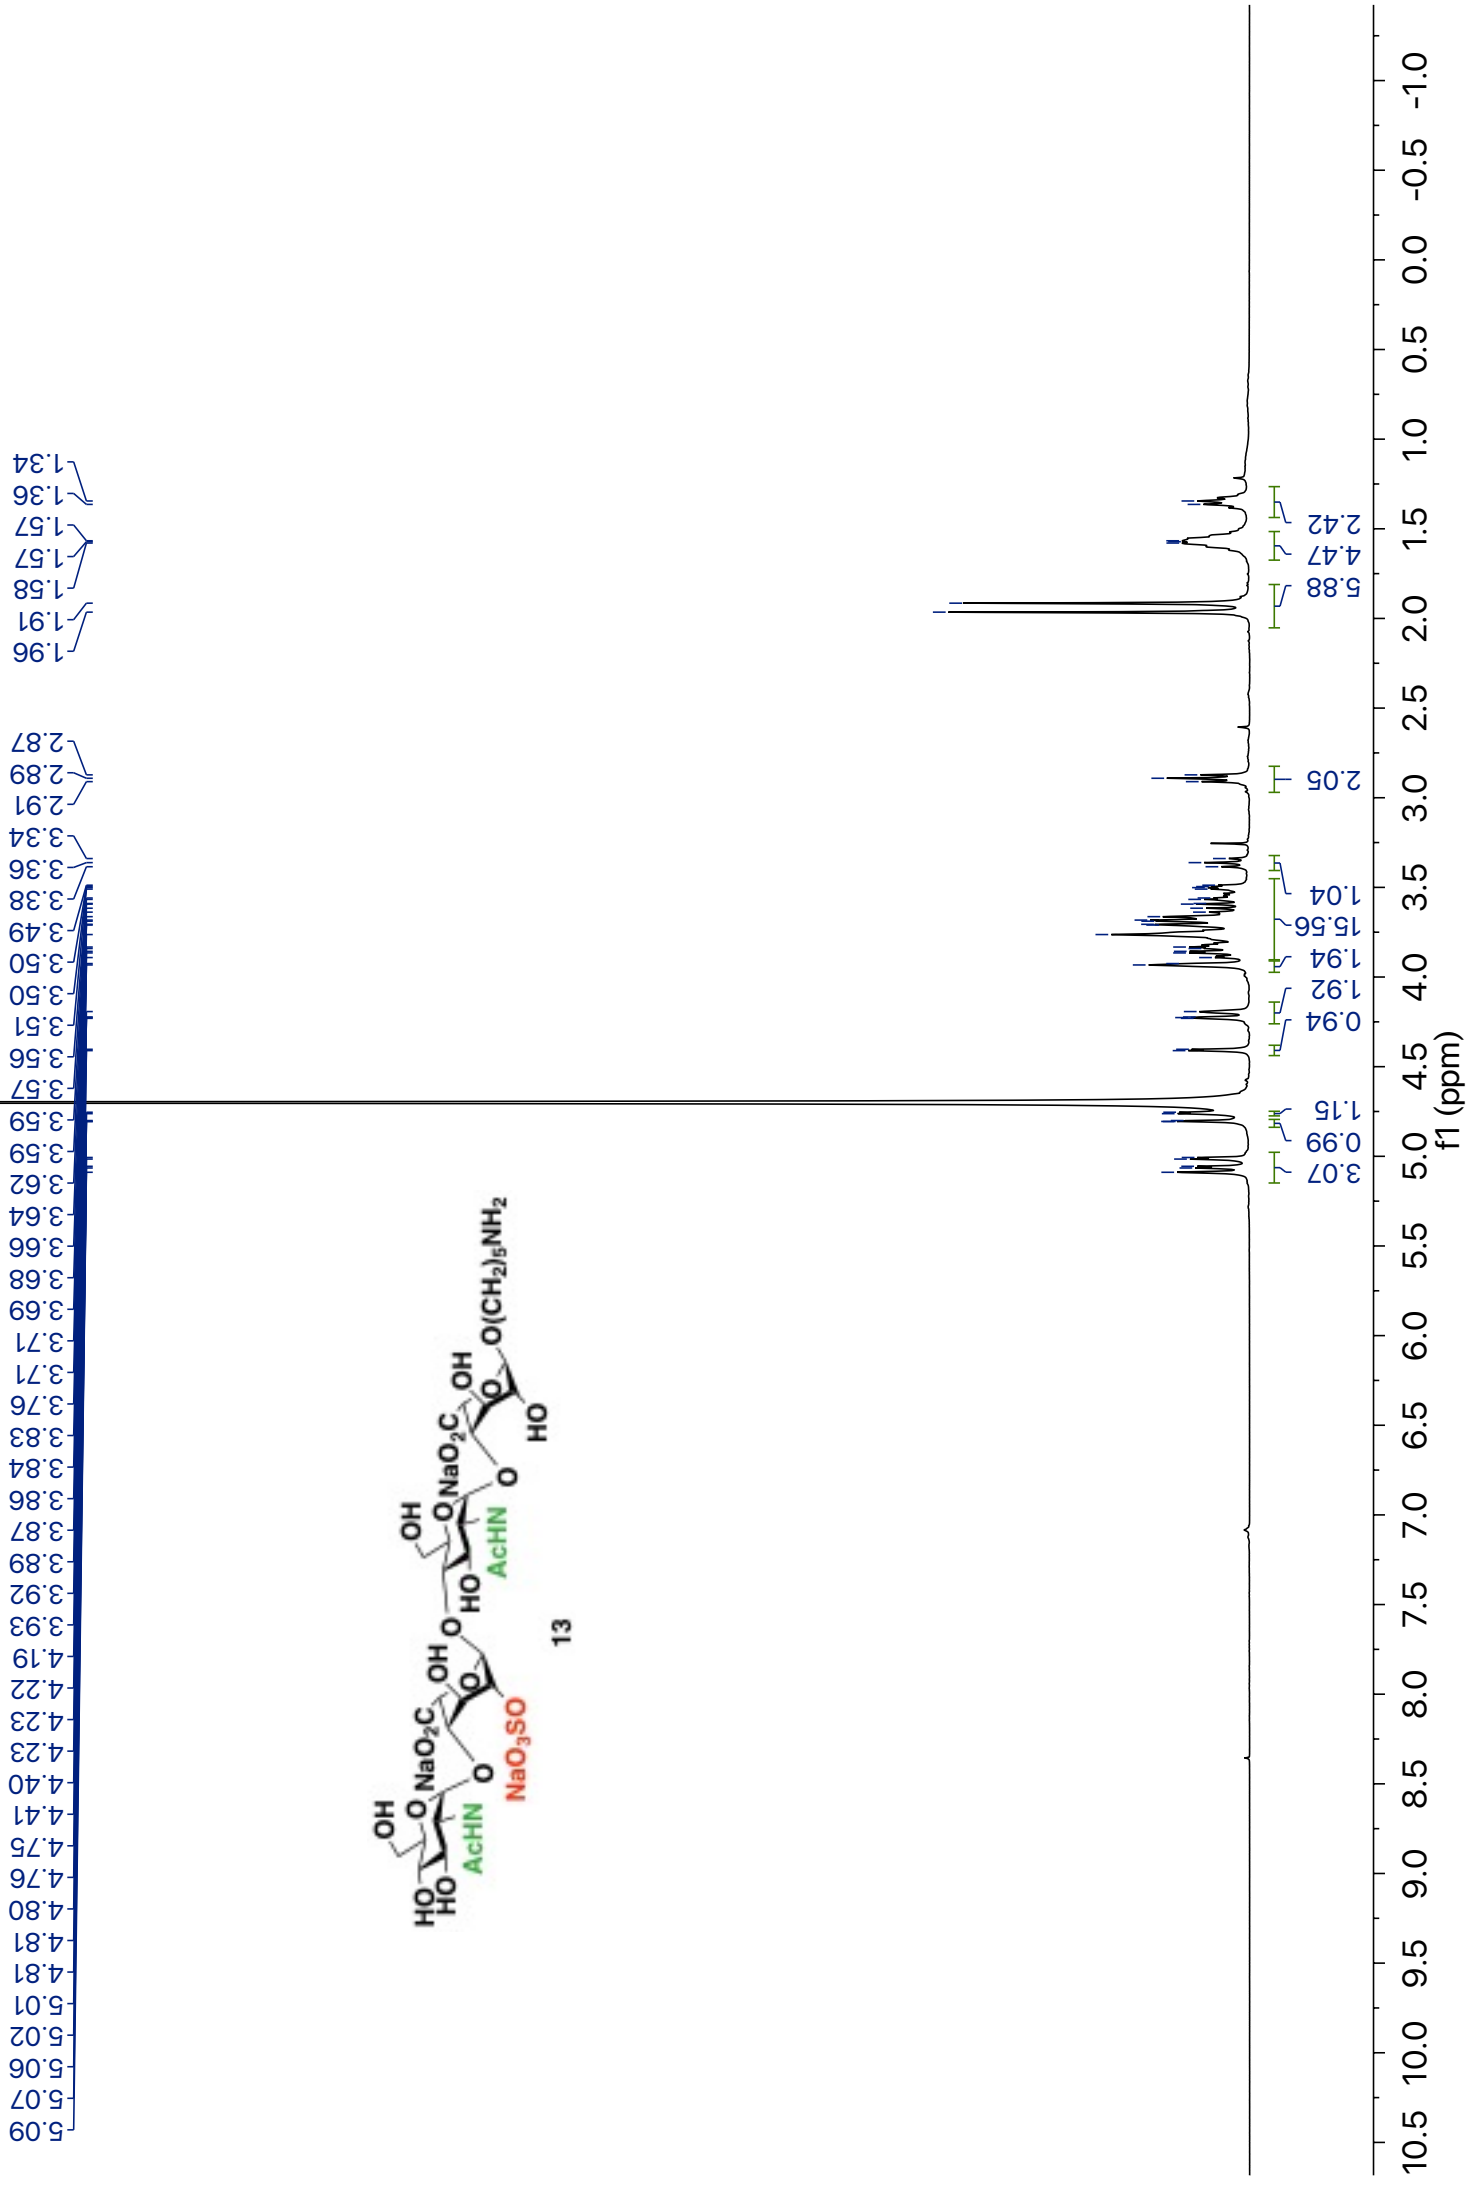

WL-2-171-D-NAc-C-2S-B-NAc-C-TC.1.1.1r

175.73  
174.94  
174.77  
174.30

100.78  
99.19  
94.46  
93.50  
77.09  
73.91  
73.35  
71.86  
71.27  
71.25  
70.32  
69.73  
69.64  
69.48  
68.95  
68.73  
68.10  
67.37  
63.29  
60.22  
59.59  
53.86  
53.35  
39.35  
28.02  
26.21  
22.23  
22.19  
21.88

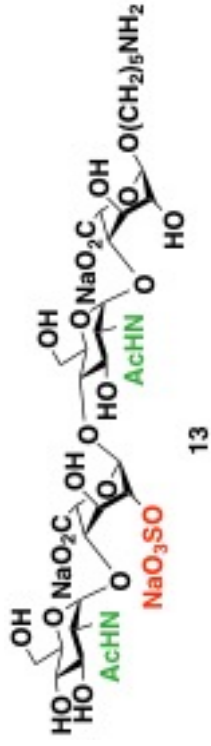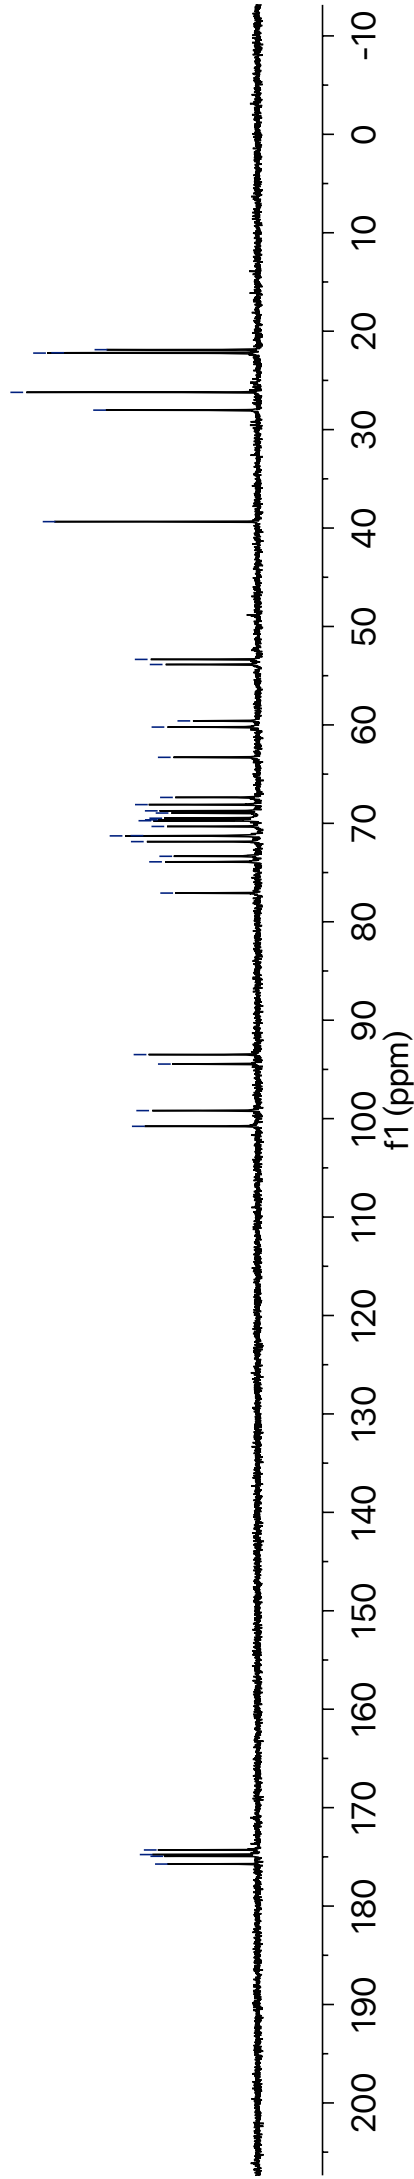

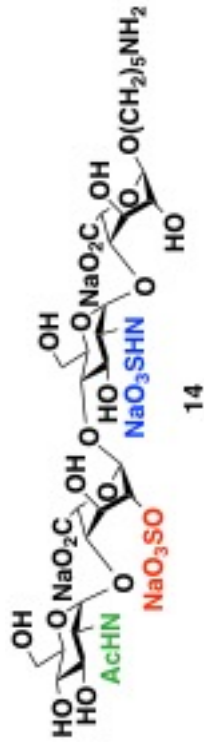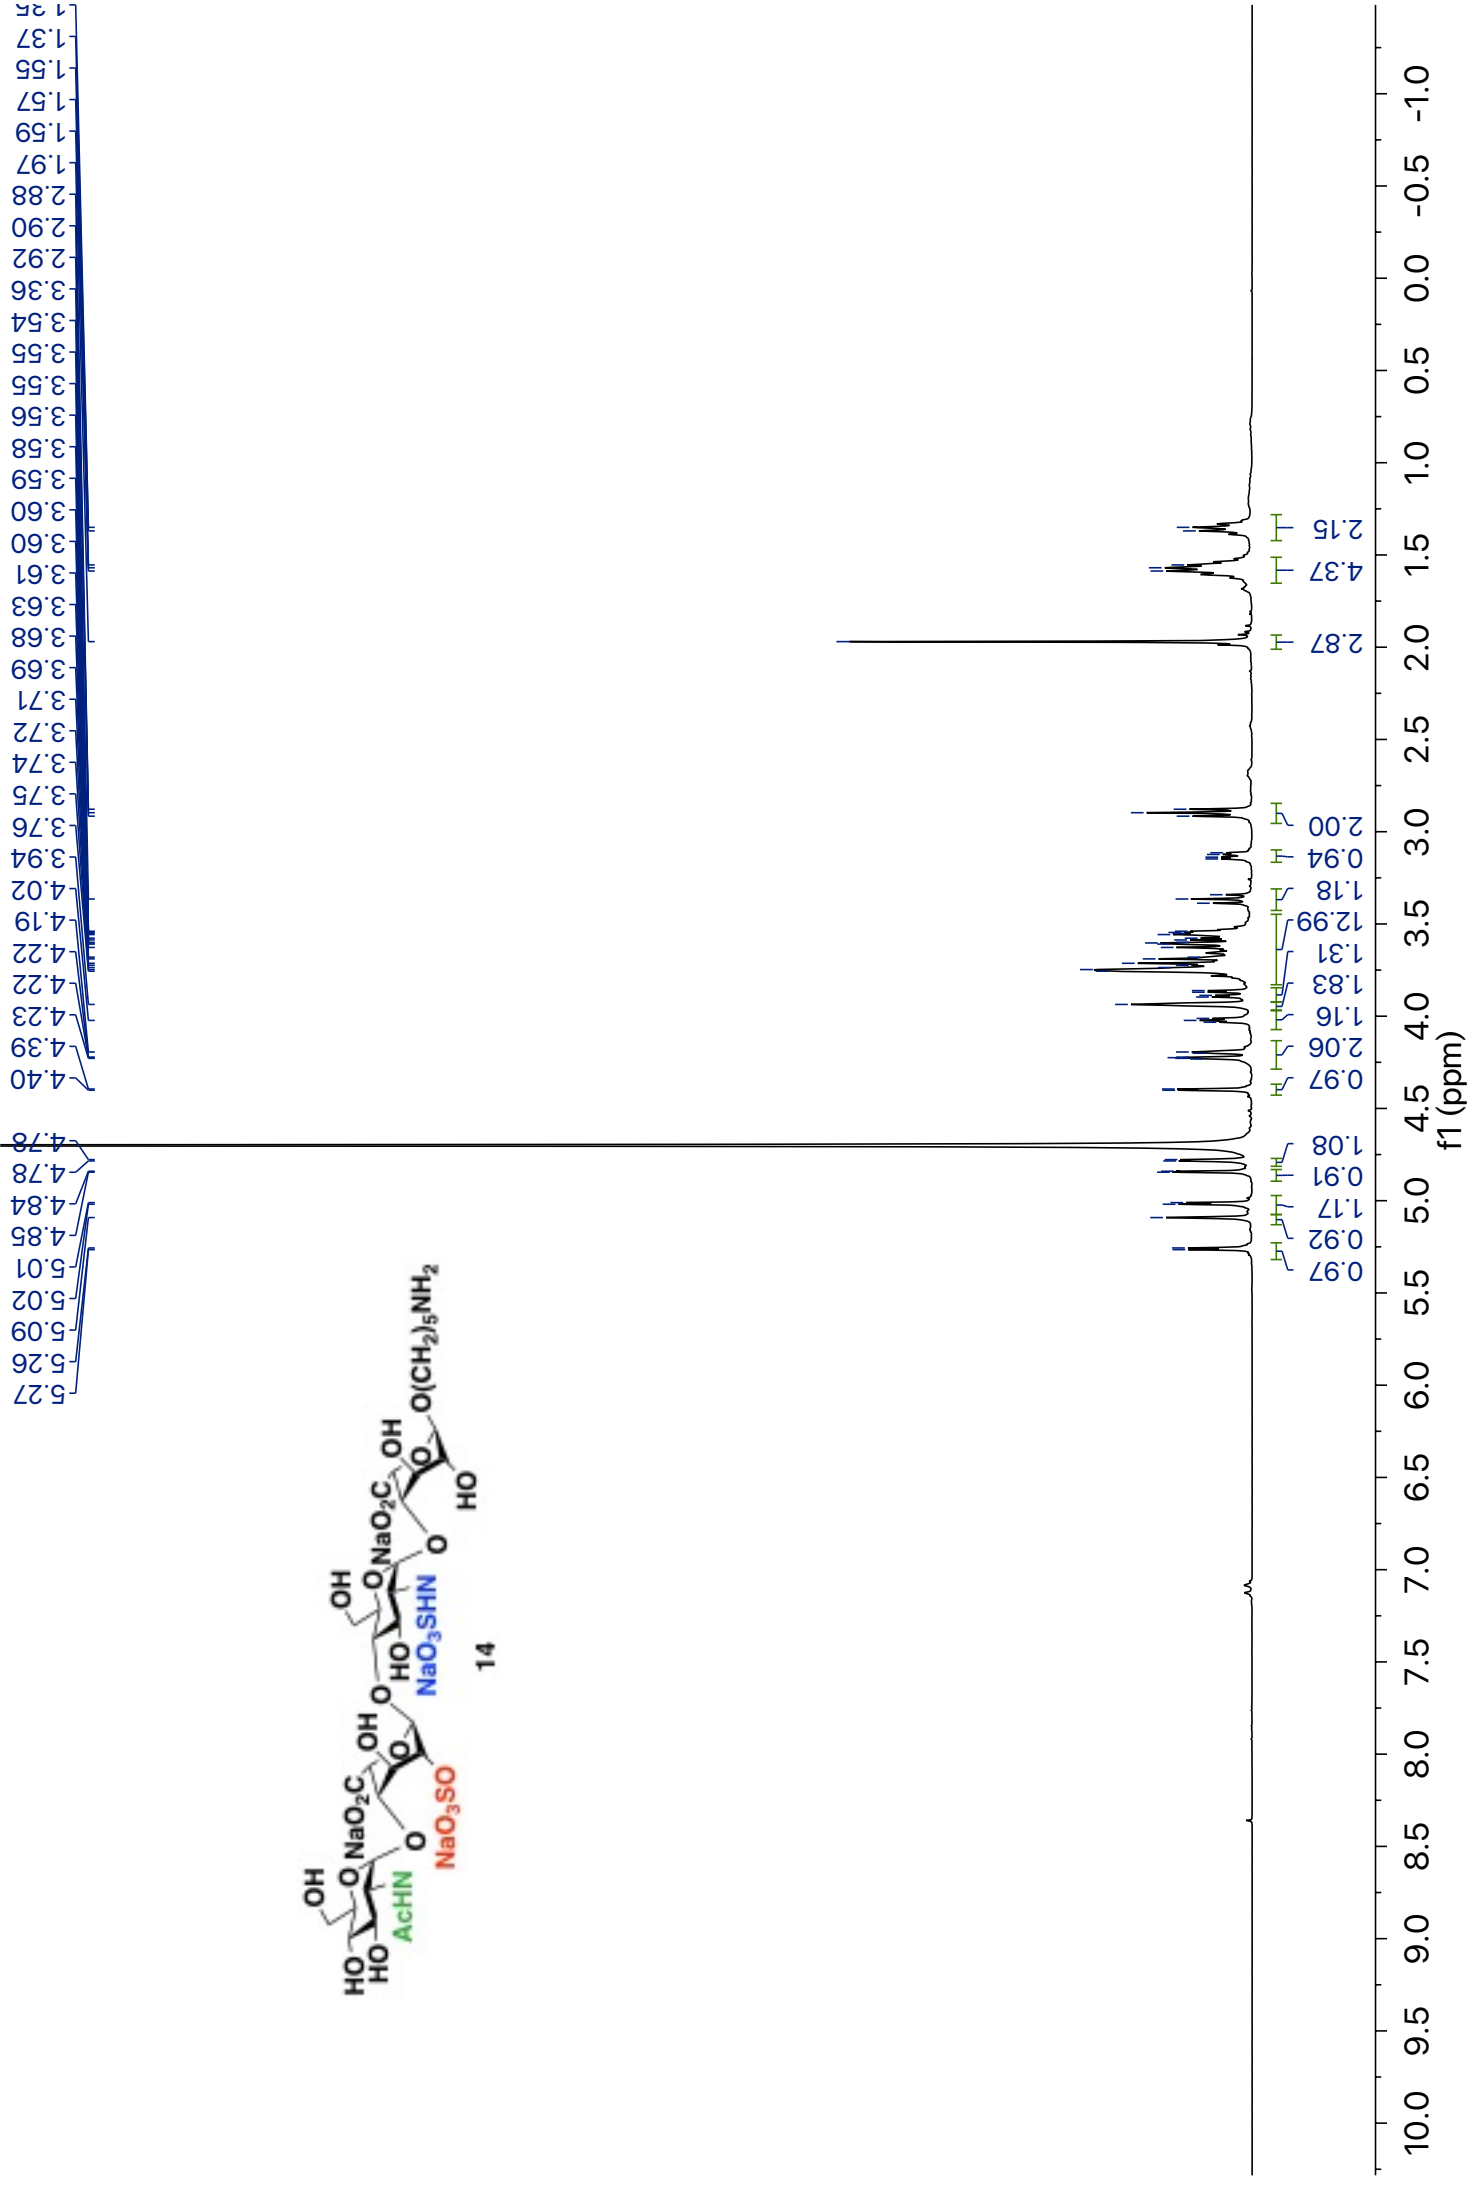

WL-2-172-D-NAc-C-2S-B-NS-C-TC.1.1.1r —

175.82  
175.24  
174.78

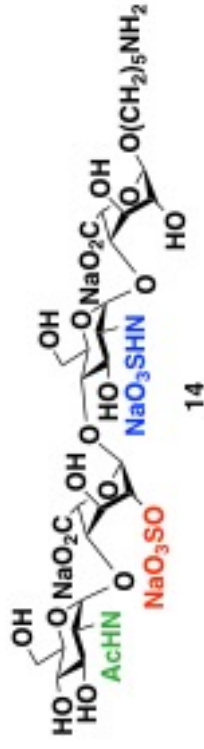

100.71  
99.09  
95.60  
93.48  
77.21  
74.82  
73.29  
71.85  
71.28  
70.99  
70.29  
69.75  
69.68  
69.02  
68.49  
68.28  
68.04  
67.36  
63.24  
60.23  
59.66  
58.12  
53.35  
39.35  
27.97  
26.21  
22.22  
22.20

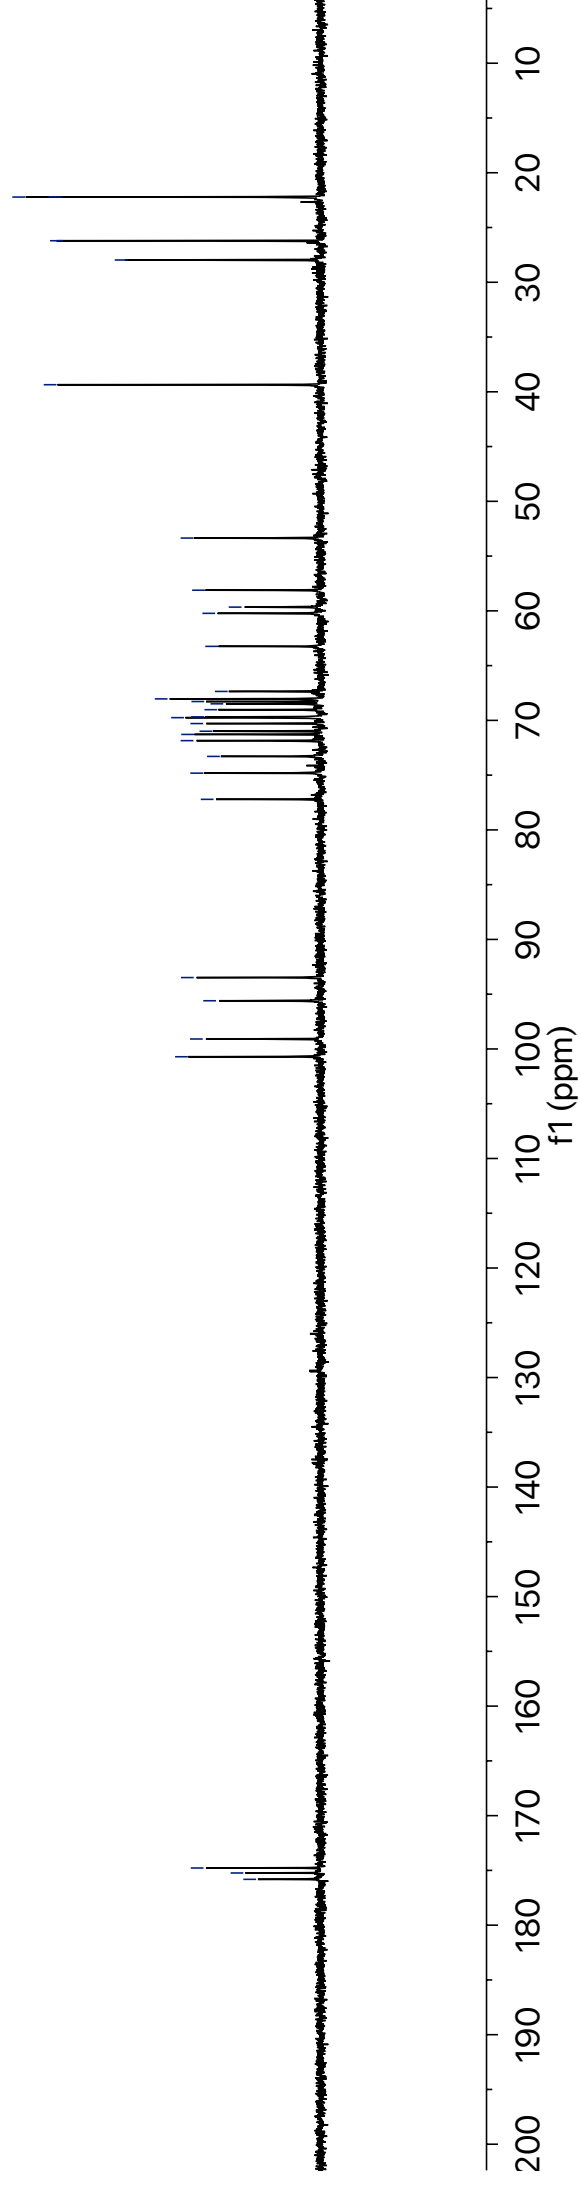





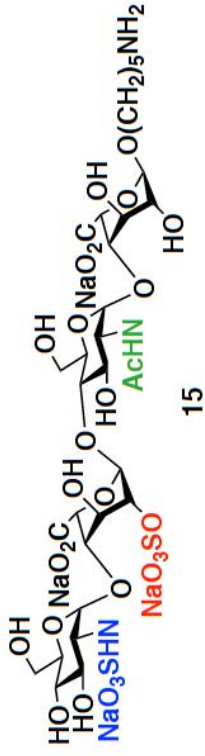

100.82  
99.19  
97.12  
94.50  
76.89  
75.62  
75.00  
74.08  
71.63  
71.27  
71.02  
69.90  
69.61  
69.06  
68.90  
68.42  
68.09  
68.04  
60.24  
59.59  
58.12  
53.77  
39.35  
28.03  
26.17  
22.21  
21.88

175.28  
174.89  
174.29

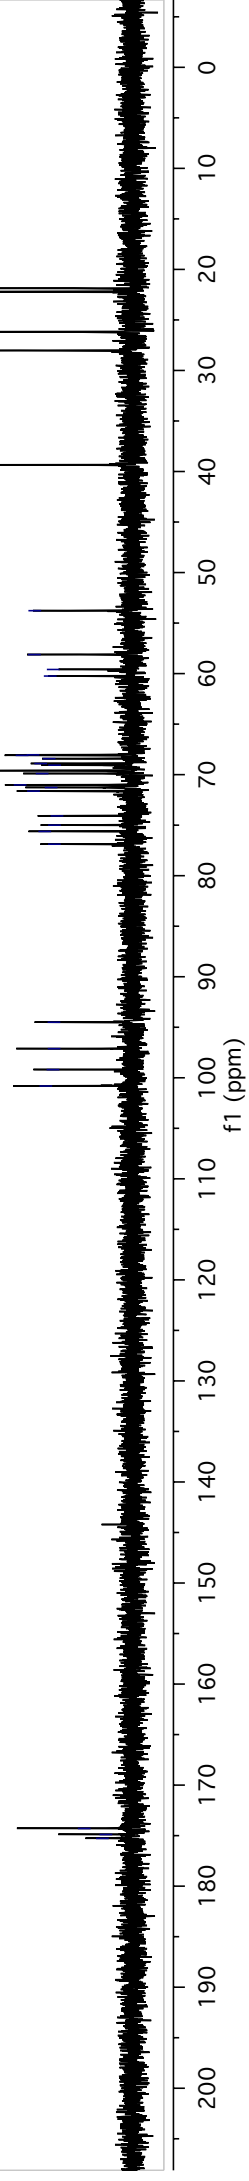

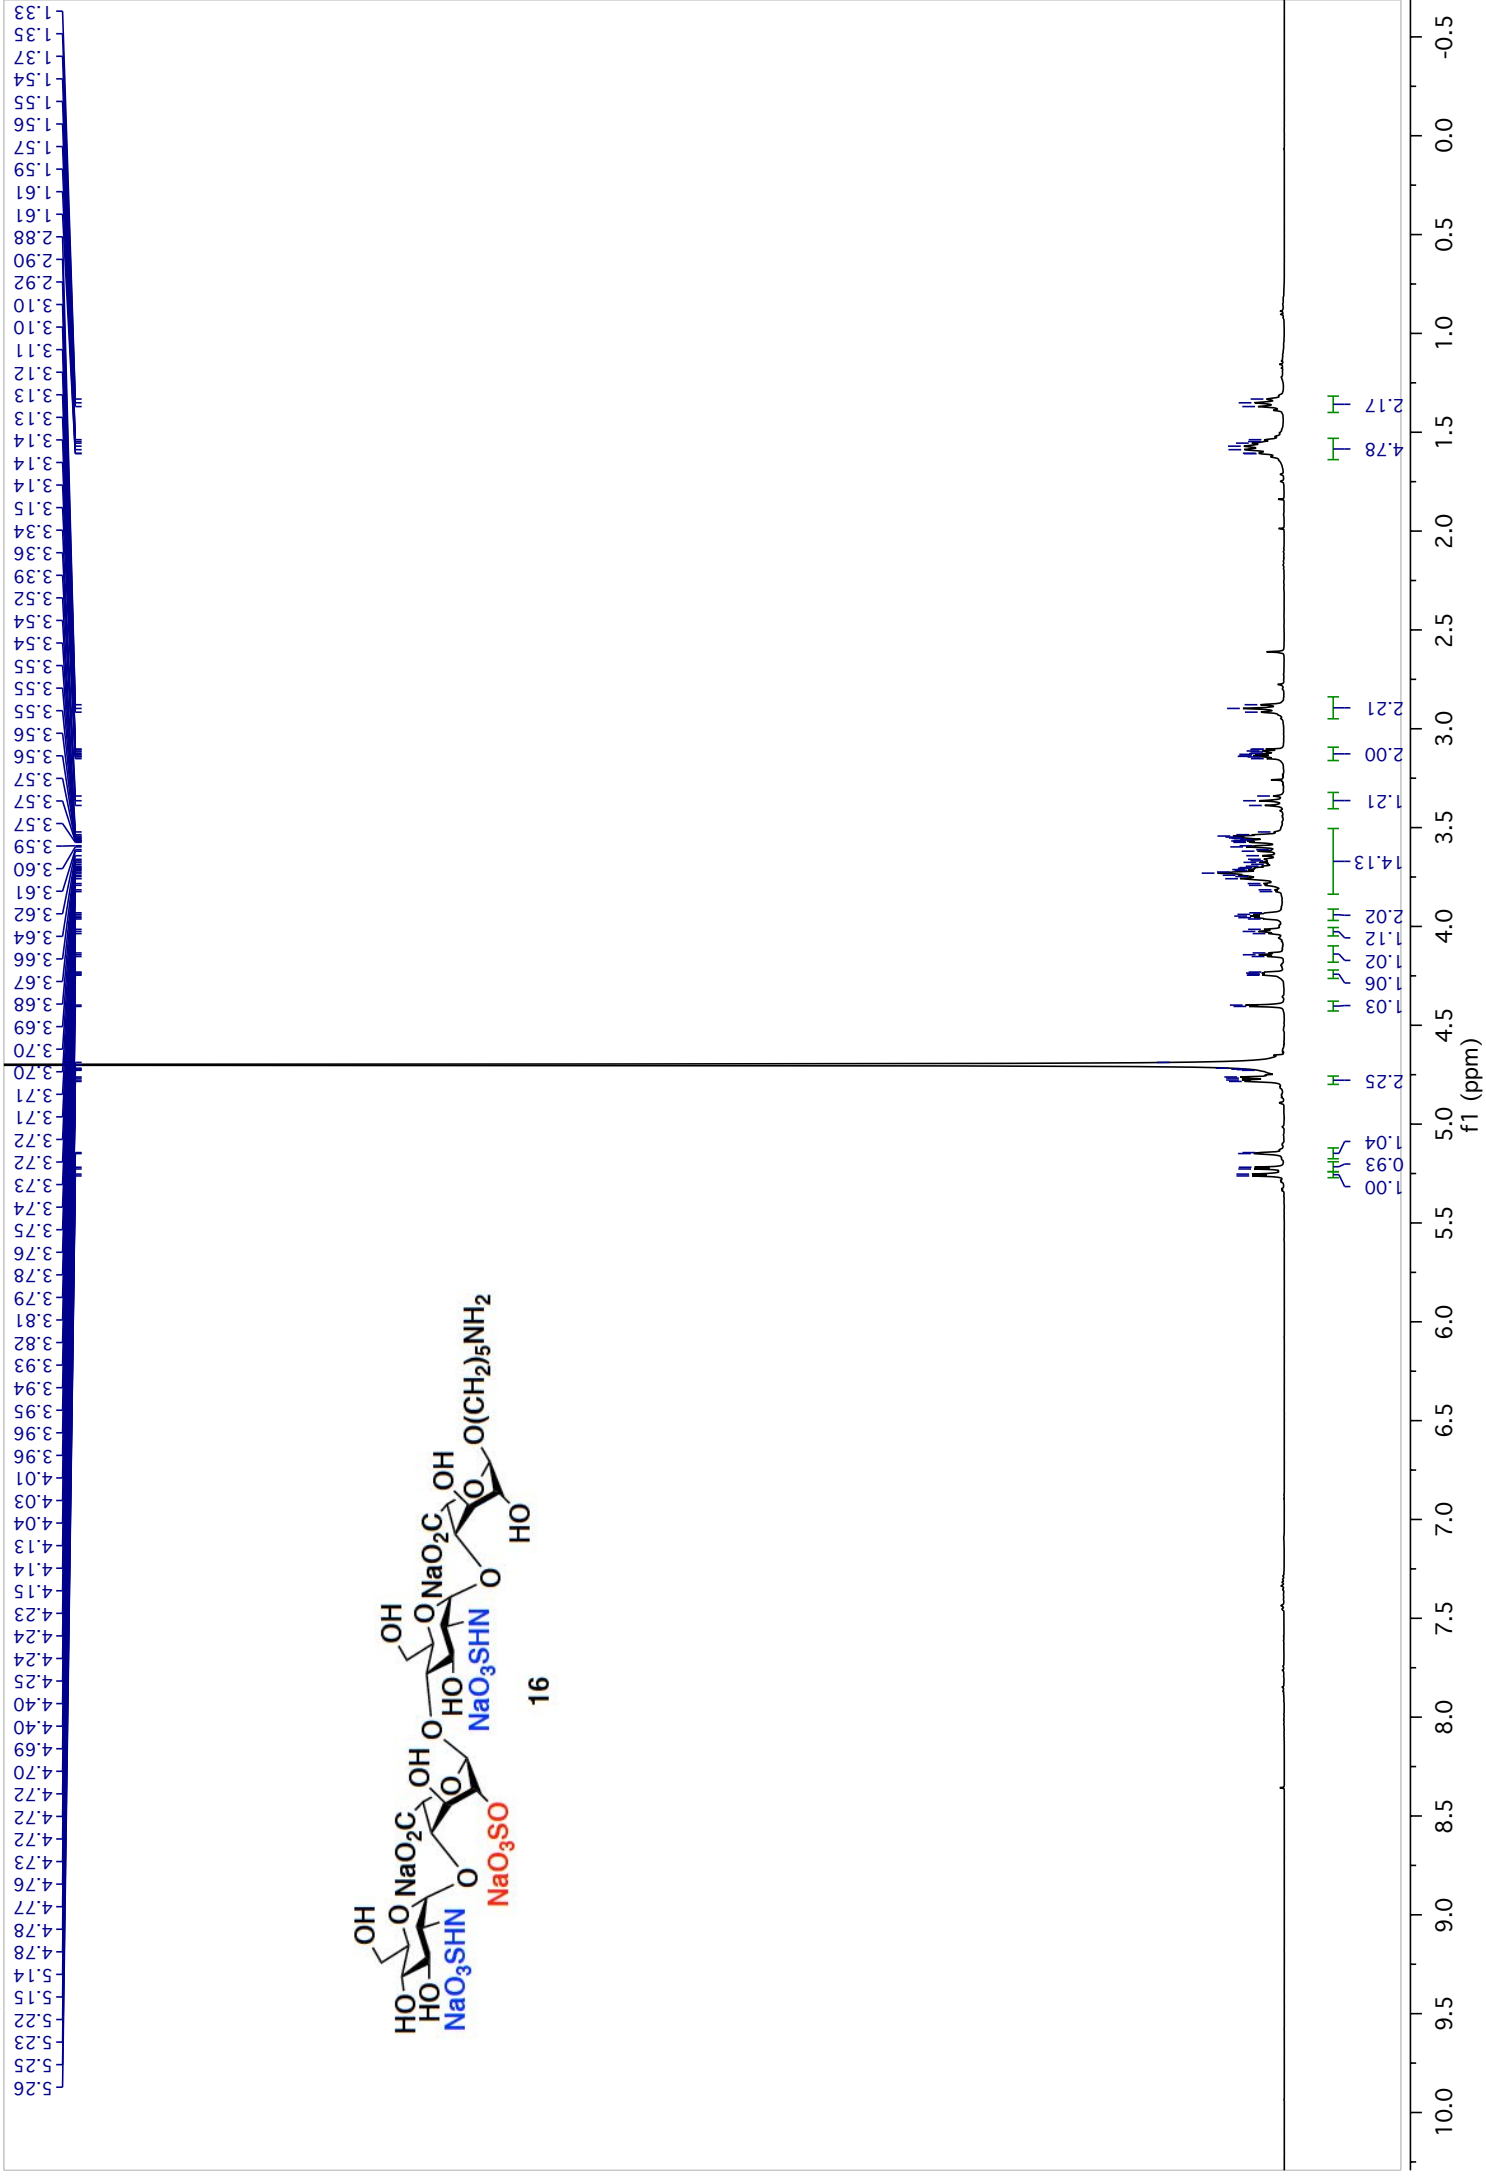



WL-2-148-D-NAC-6SO3-B-NAC-H-TC.3.1.1r —

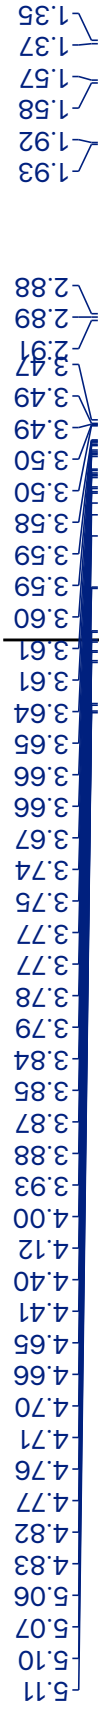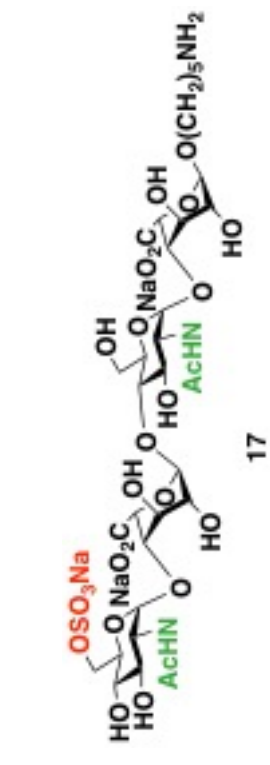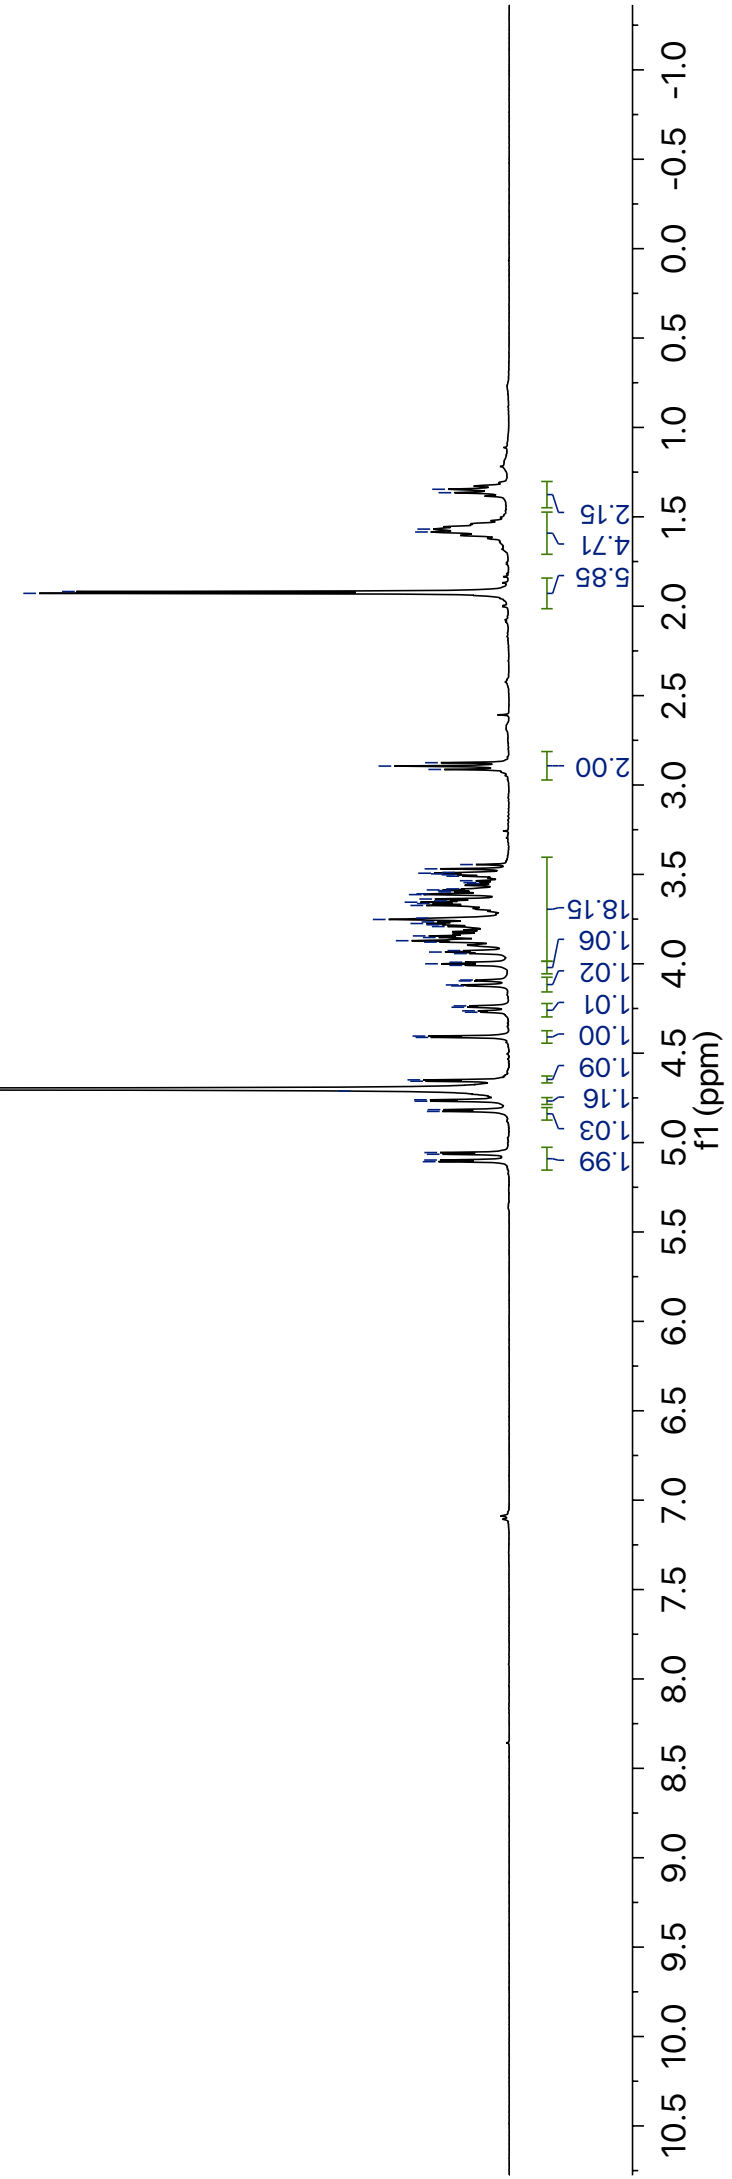

WL-2-148-D-NAc-6SO3-B-NAc-C-TC.2.1.1r —

174.99  
174.84  
174.34  
174.31

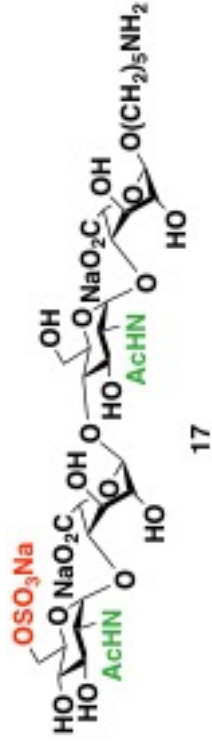

101.66  
100.77  
94.55  
94.32  
76.67  
74.30  
74.05  
71.10  
70.97  
70.10  
69.87  
69.81  
69.59  
69.42  
69.07  
68.86  
68.67  
68.11  
66.40  
59.64  
53.69  
53.35  
39.34  
28.00  
26.21  
22.20  
21.88

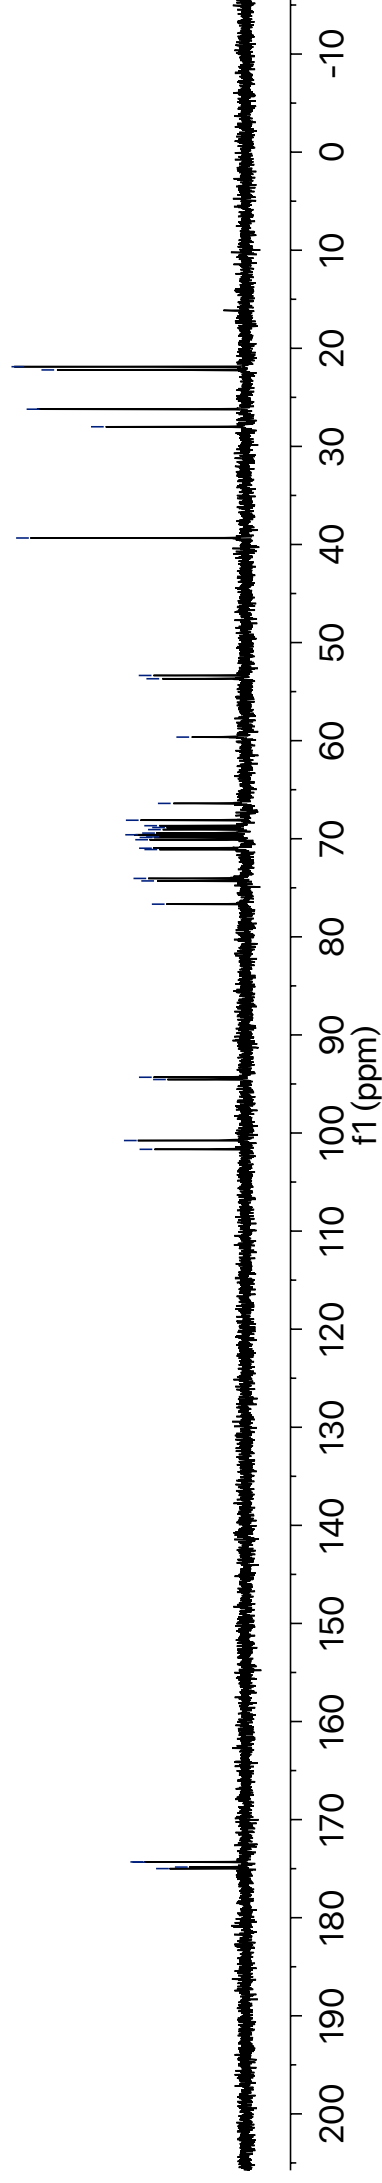

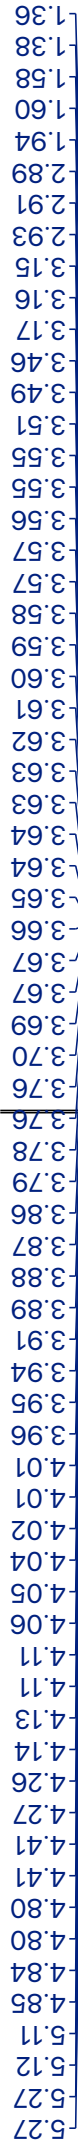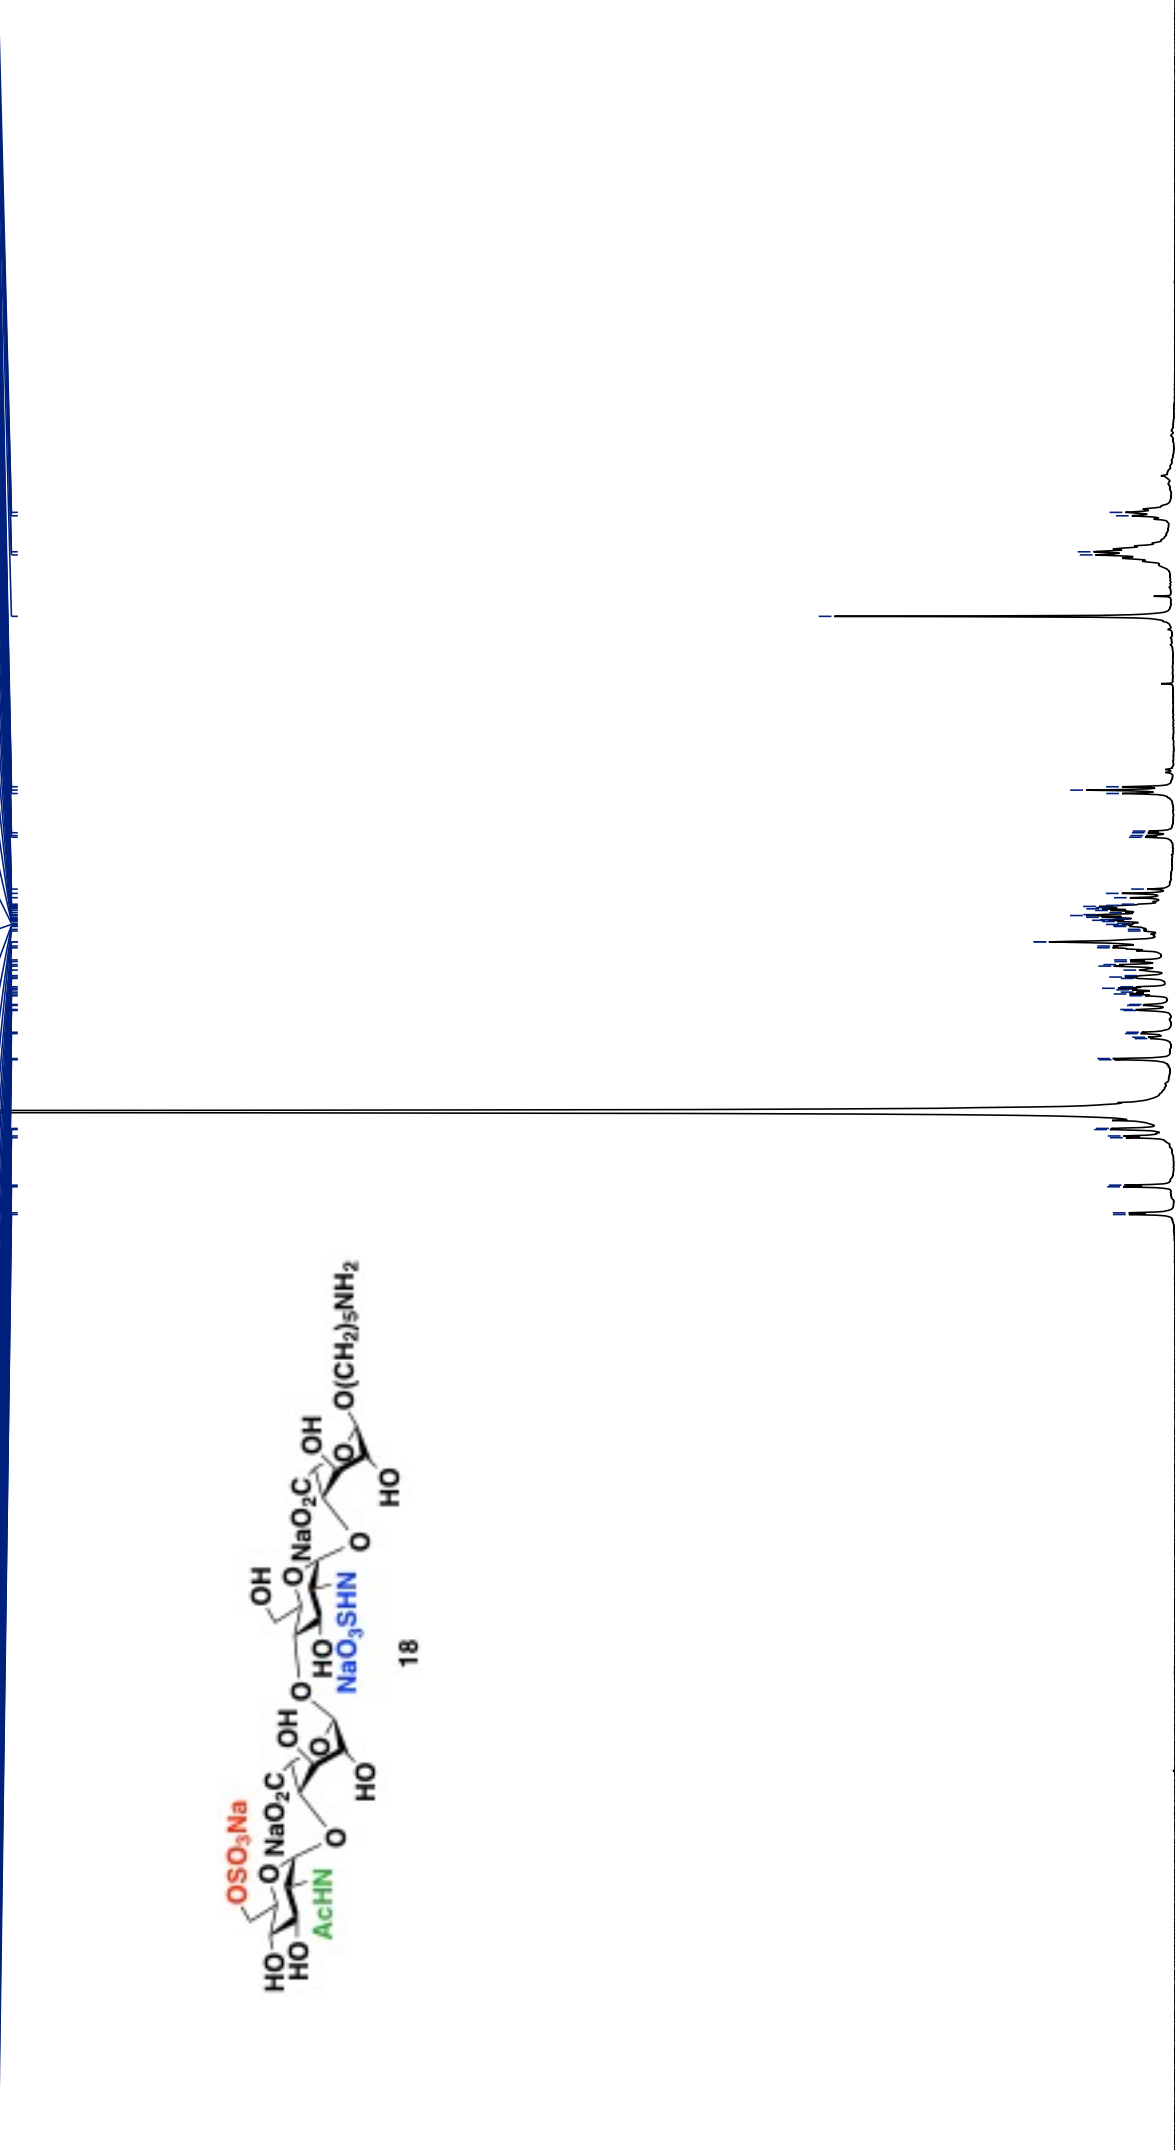

| Chemical Shift (ppm) | Integration |
|----------------------|-------------|
| 0.82                 | 1.03        |
| 0.86                 | 0.96        |
| 0.93                 | 1.03        |
| 0.96                 | 0.96        |
| 1.08                 | 1.10        |
| 1.10                 | 1.10        |
| 1.93                 | 1.93        |
| 0.99                 | 0.99        |
| 2.32                 | 2.32        |
| 3.96                 | 3.96        |
| 8.70                 | 8.70        |
| 0.94                 | 0.94        |
| 1.99                 | 1.99        |
| 3.00                 | 3.00        |
| 4.51                 | 4.51        |
| 2.04                 | 2.04        |

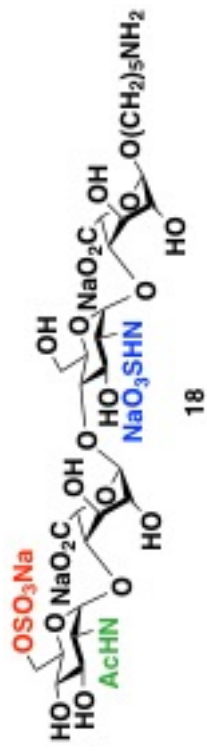

175.31  
174.86  
174.35

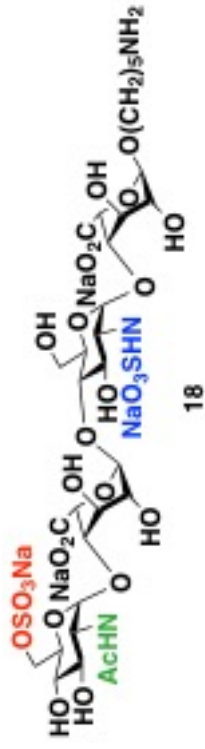

101.49  
100.69  
95.71  
94.31  
76.79  
74.91  
74.30  
70.96  
70.86  
70.10  
70.04  
69.86  
69.63  
69.53  
69.05  
68.97  
68.38  
68.15  
68.03  
66.37  
59.75  
59.53  
57.94  
53.37  
39.35  
27.93  
26.21  
24.92  
22.20  
21.87

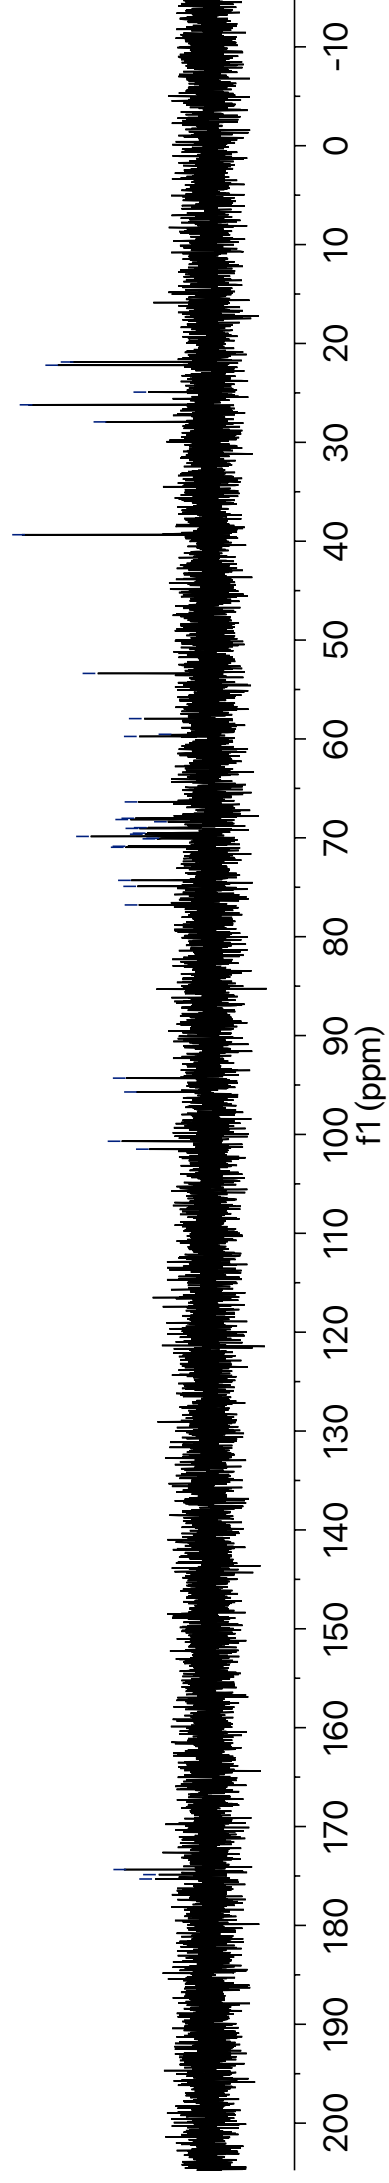

WL-2-248-D-6S-NS-B-NAc-Prod-H-TC.1.1.1r —

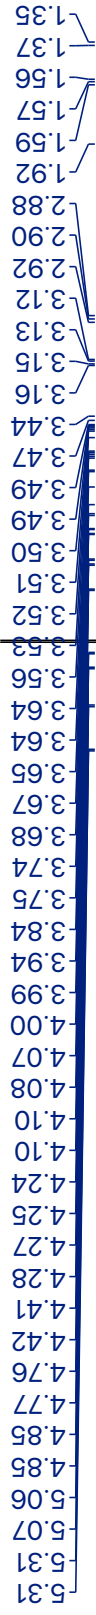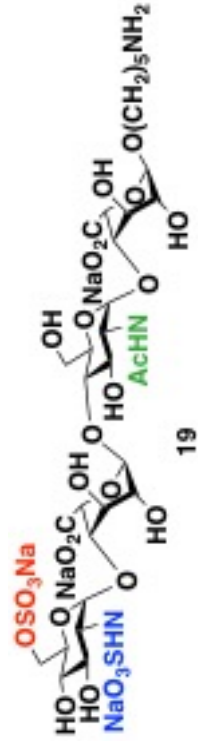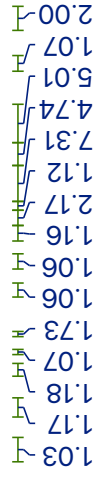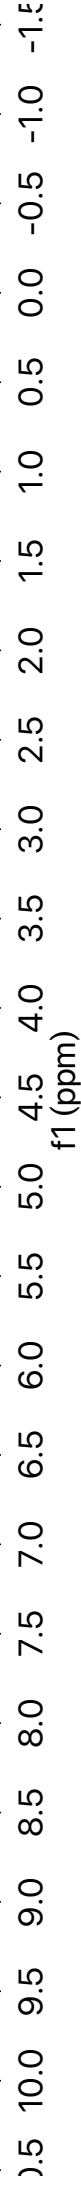



175.07  
175.00  
174.31

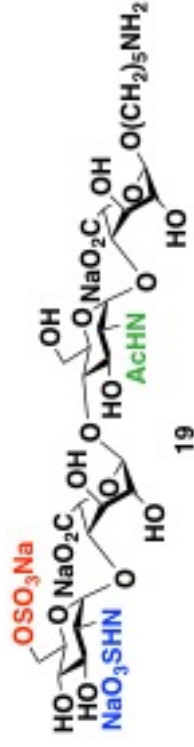

101.66  
100.77  
95.28  
94.53  
76.88  
74.79  
74.01  
71.12  
69.85  
69.65  
69.41  
69.34  
69.25  
69.08  
68.86  
68.80  
68.65  
68.13  
66.41  
59.64  
57.67  
53.71  
39.35  
28.01  
26.23  
22.22  
21.89

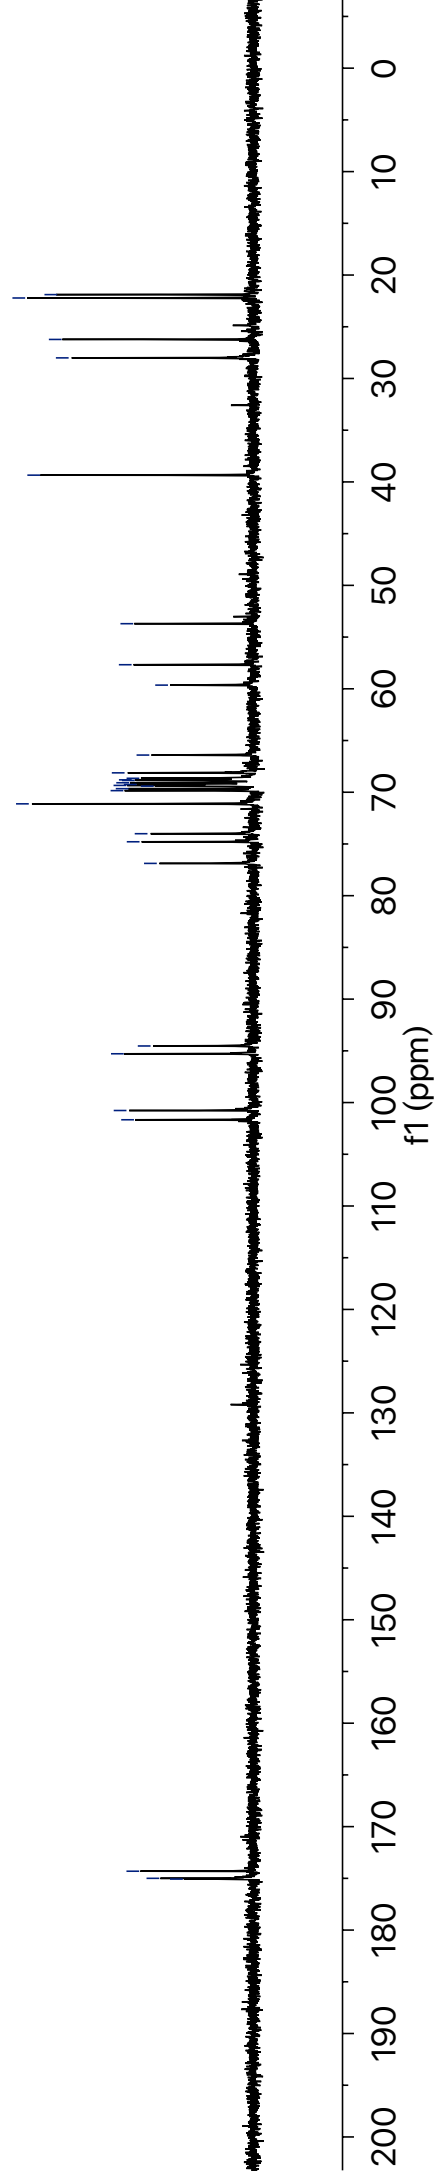

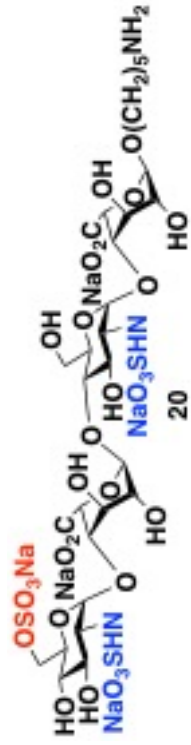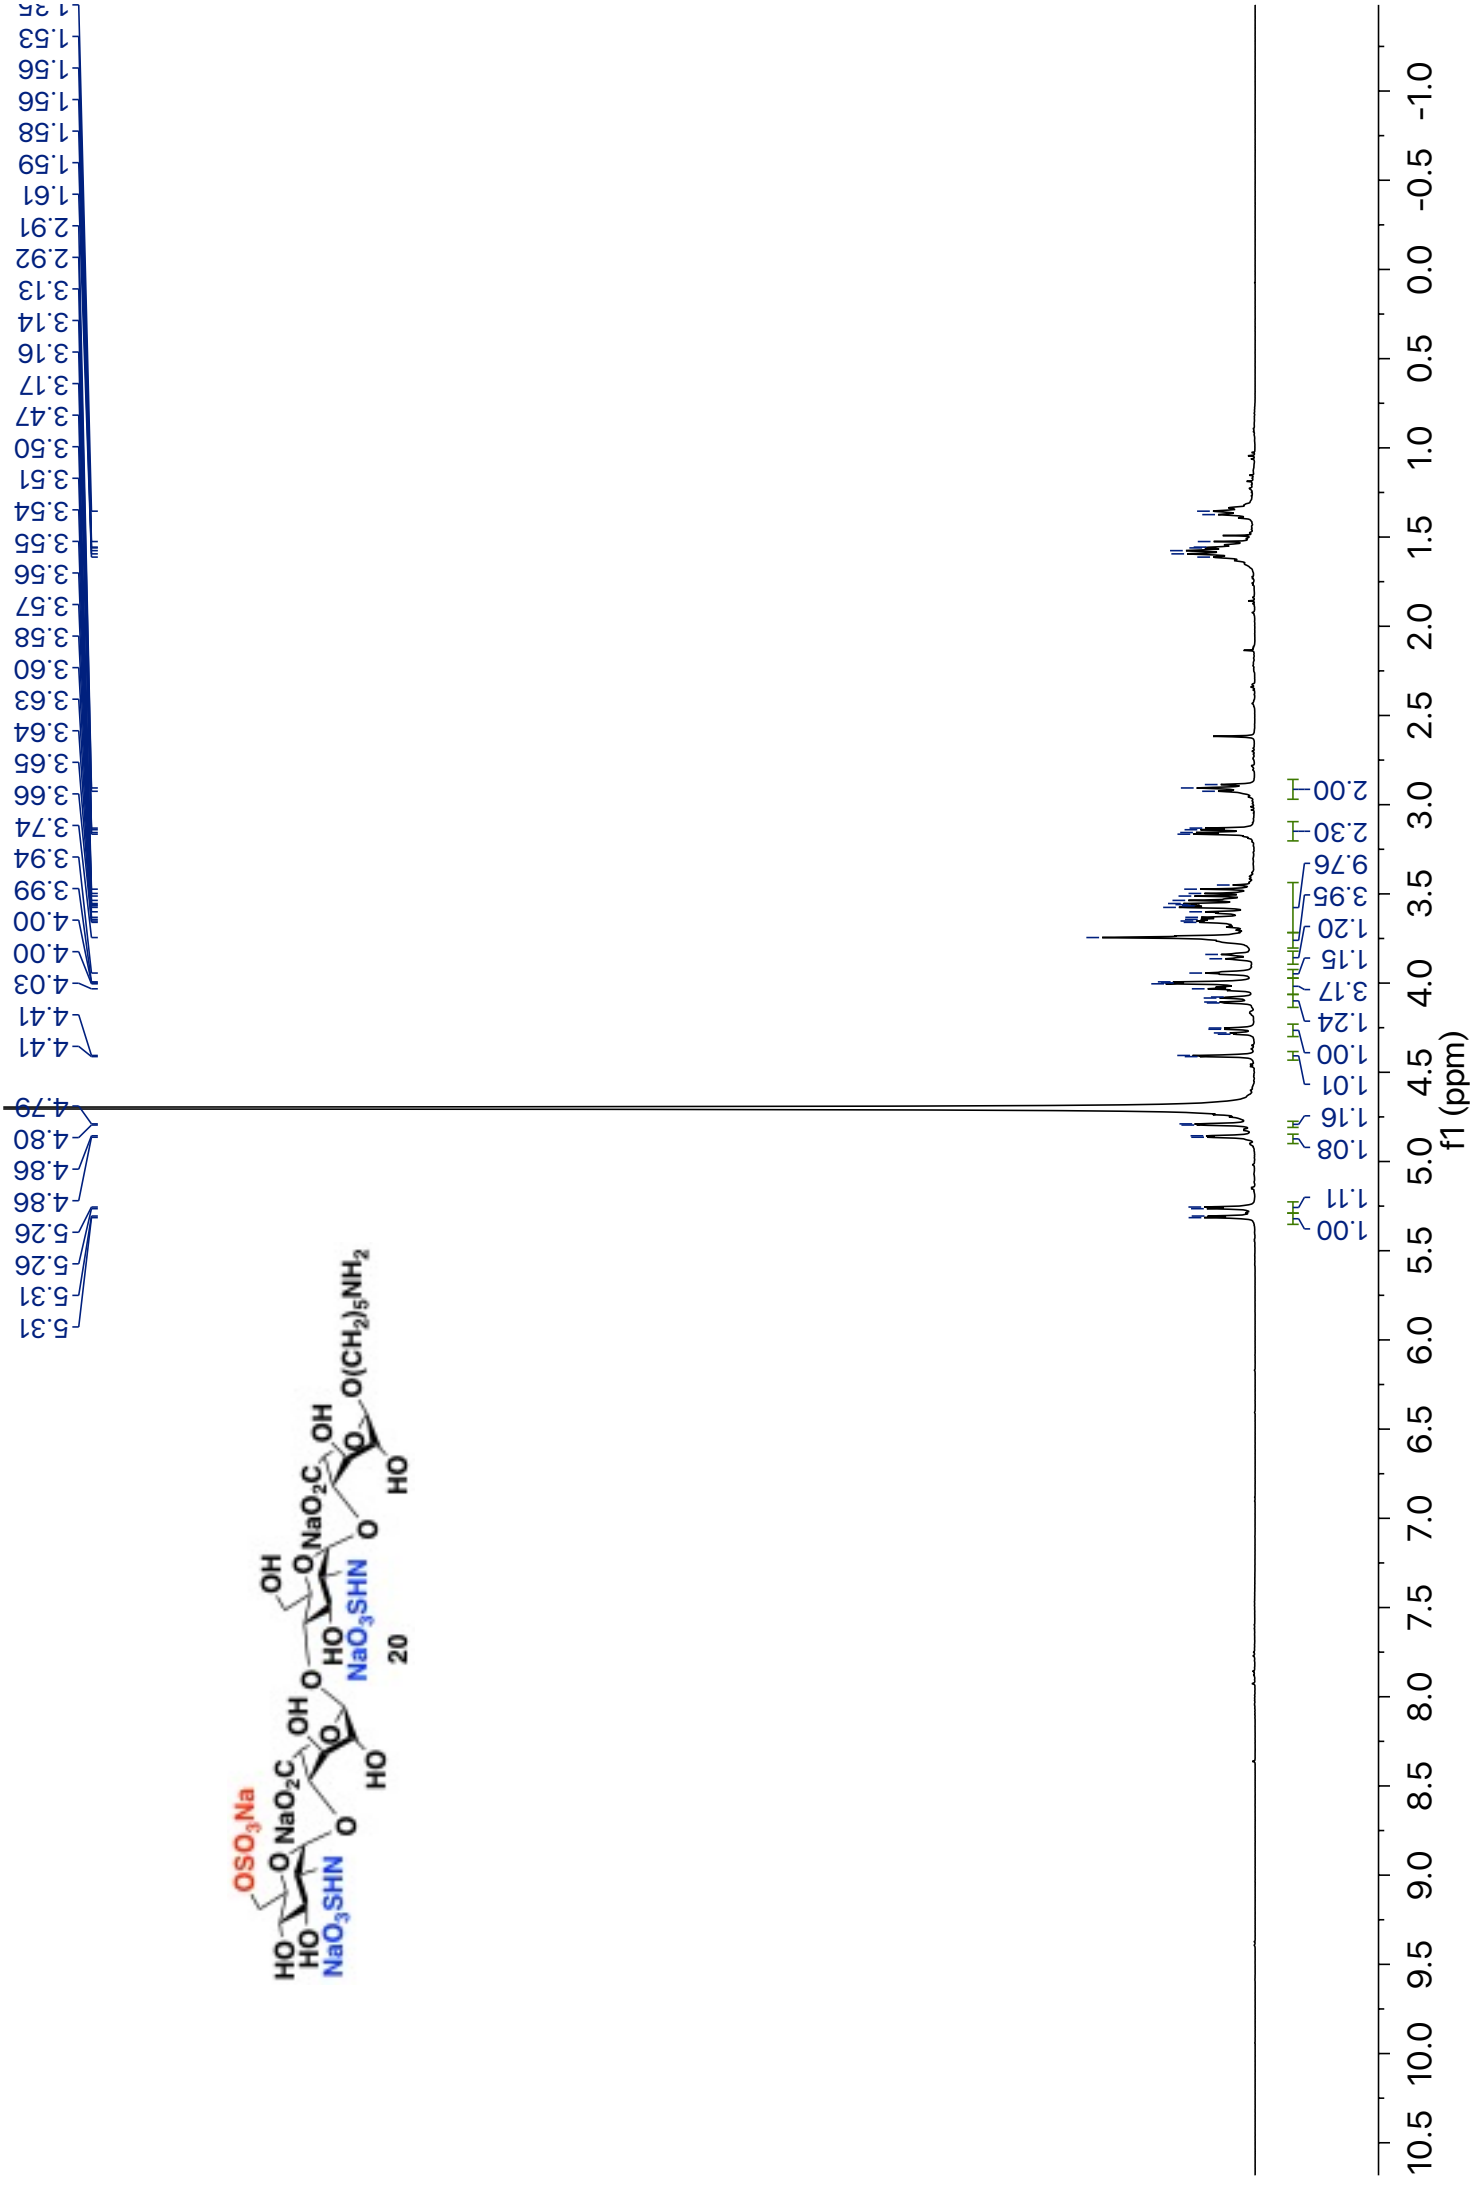

WL-2-245-D-6S-NS-B-NS-Prod-C-TC.1.1.1r —

175.30  
175.16

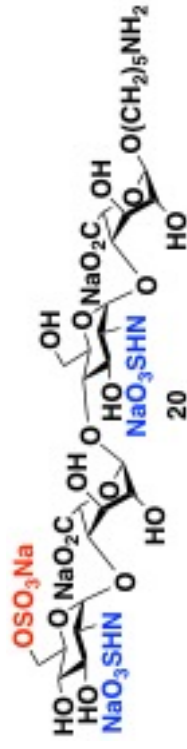

101.58  
100.69  
95.64  
95.35  
77.05  
74.77  
71.13  
70.89  
69.86  
69.71  
69.26  
69.21  
69.08  
68.87  
68.67  
68.32  
68.07  
66.41  
59.72  
57.95  
57.67  
39.36  
27.97  
26.26  
22.24

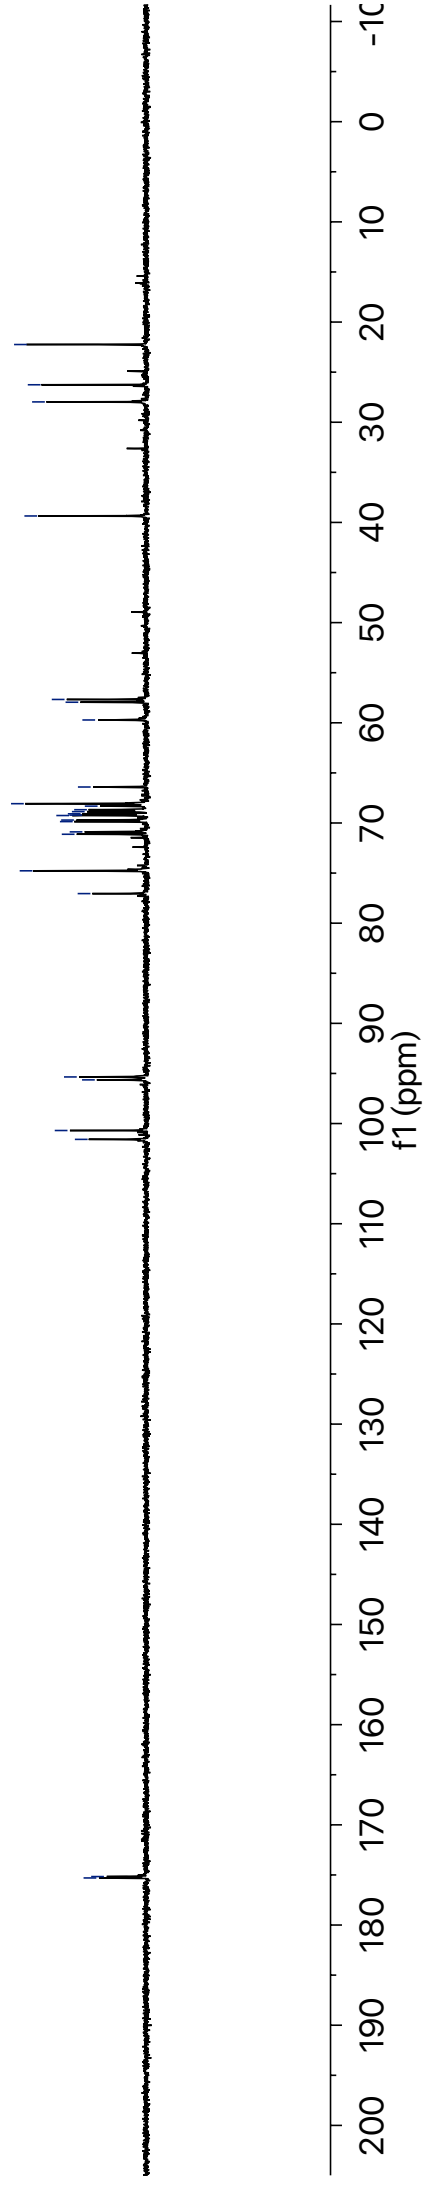

5.08  
5.07  
5.02  
5.01  
4.88  
4.87  
4.67  
4.67  
4.46  
4.46  
4.24  
4.18  
4.18  
4.16  
4.16  
4.15  
4.15  
4.13  
4.13  
4.12  
4.12  
3.98  
3.98  
3.96  
3.93  
3.93  
3.92  
3.85  
3.84  
3.82  
3.81  
3.72  
3.65  
3.64  
3.64  
3.63  
3.62  
3.62  
3.60  
3.59  
3.57  
3.37  
3.33  
2.91  
2.90  
2.89  
1.96  
1.93  
1.61  
1.59  
1.58  
1.56  
1.39  
1.36

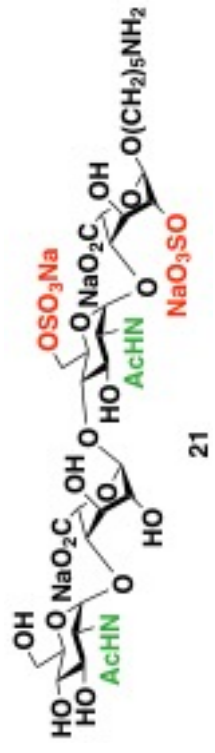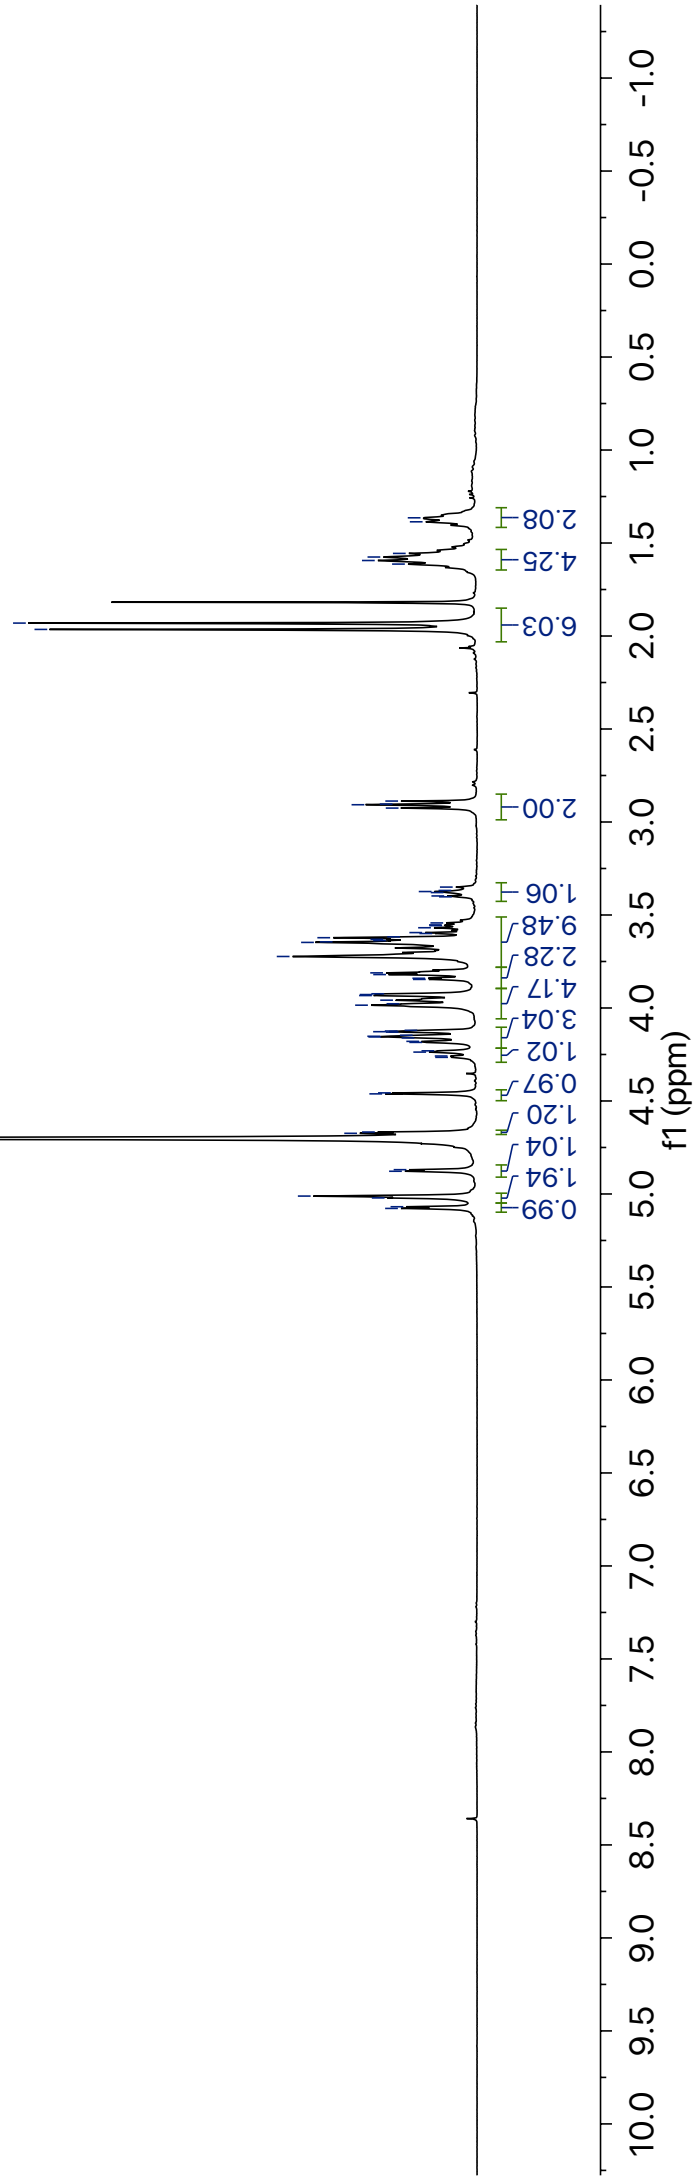

WL-2-261-run2-D-NAC-B-NAC-6S-A-2S-C-TC.8.1.1r —

175.22  
175.06  
174.72  
174.45

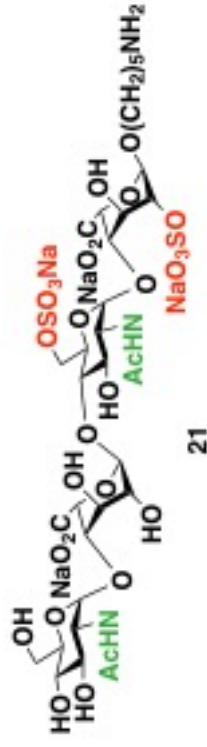

101.84  
98.49  
94.31  
93.72  
76.68  
74.02  
73.85  
71.90  
71.11  
71.03  
70.01  
69.63  
69.48  
69.45  
69.12  
69.01  
68.09  
66.90  
66.18  
63.95  
60.13  
53.53  
53.37  
39.37  
27.76  
26.25  
22.27  
22.19  
21.91

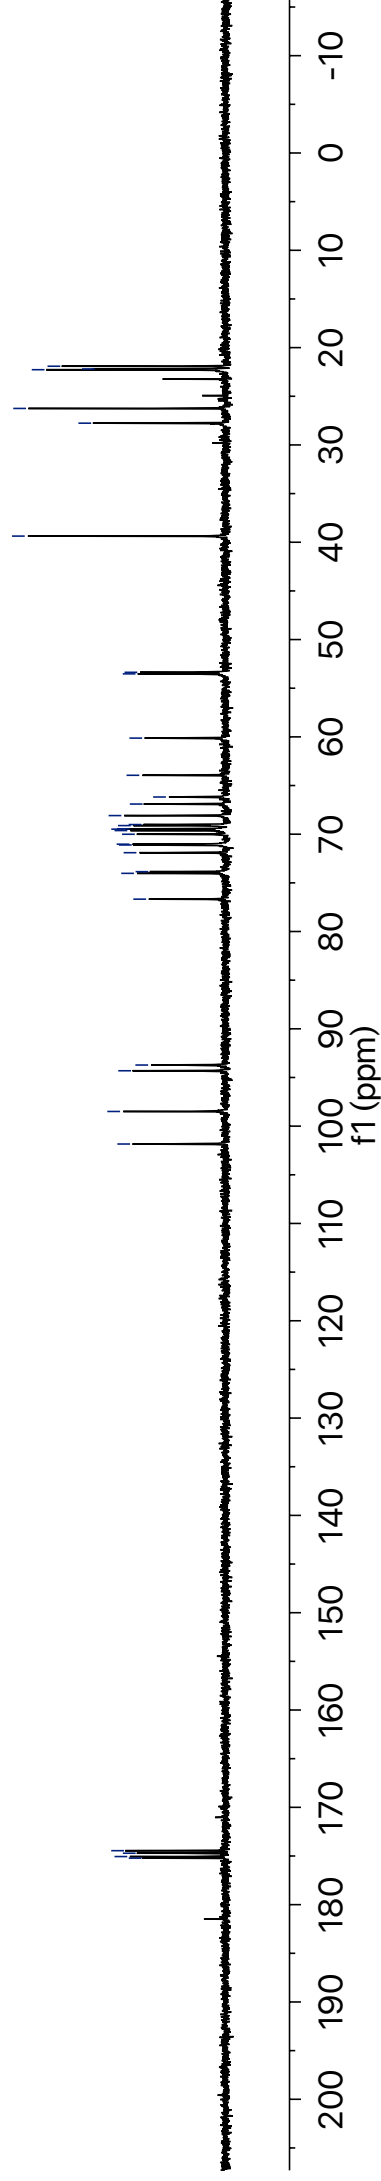

WL-2-267-D-NAc-B-NS-6S-A-2S-H-TC.7.1.1r —

5.28  
5.27  
5.08  
5.07  
5.06  
5.05  
5.05  
4.91  
4.90  
4.73  
4.73  
4.43  
4.42  
4.24  
4.24  
4.14  
3.99  
3.98  
3.97  
3.96  
3.85  
3.84  
3.84  
3.83  
3.82  
3.82  
3.81  
3.73  
3.67  
3.65  
3.64  
3.64  
3.63  
3.61  
3.60  
3.59  
3.58  
3.57  
3.56  
3.55  
3.38  
3.20  
3.19  
3.18  
3.17  
2.93  
2.91  
2.89  
1.93  
1.60  
1.58  
1.39  
1.37  
1.37

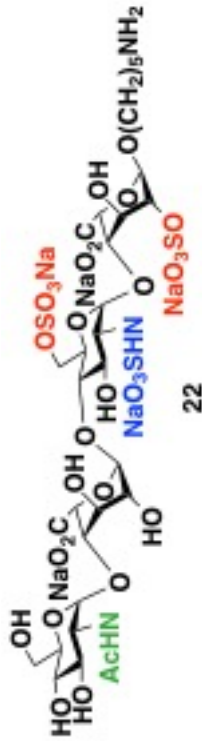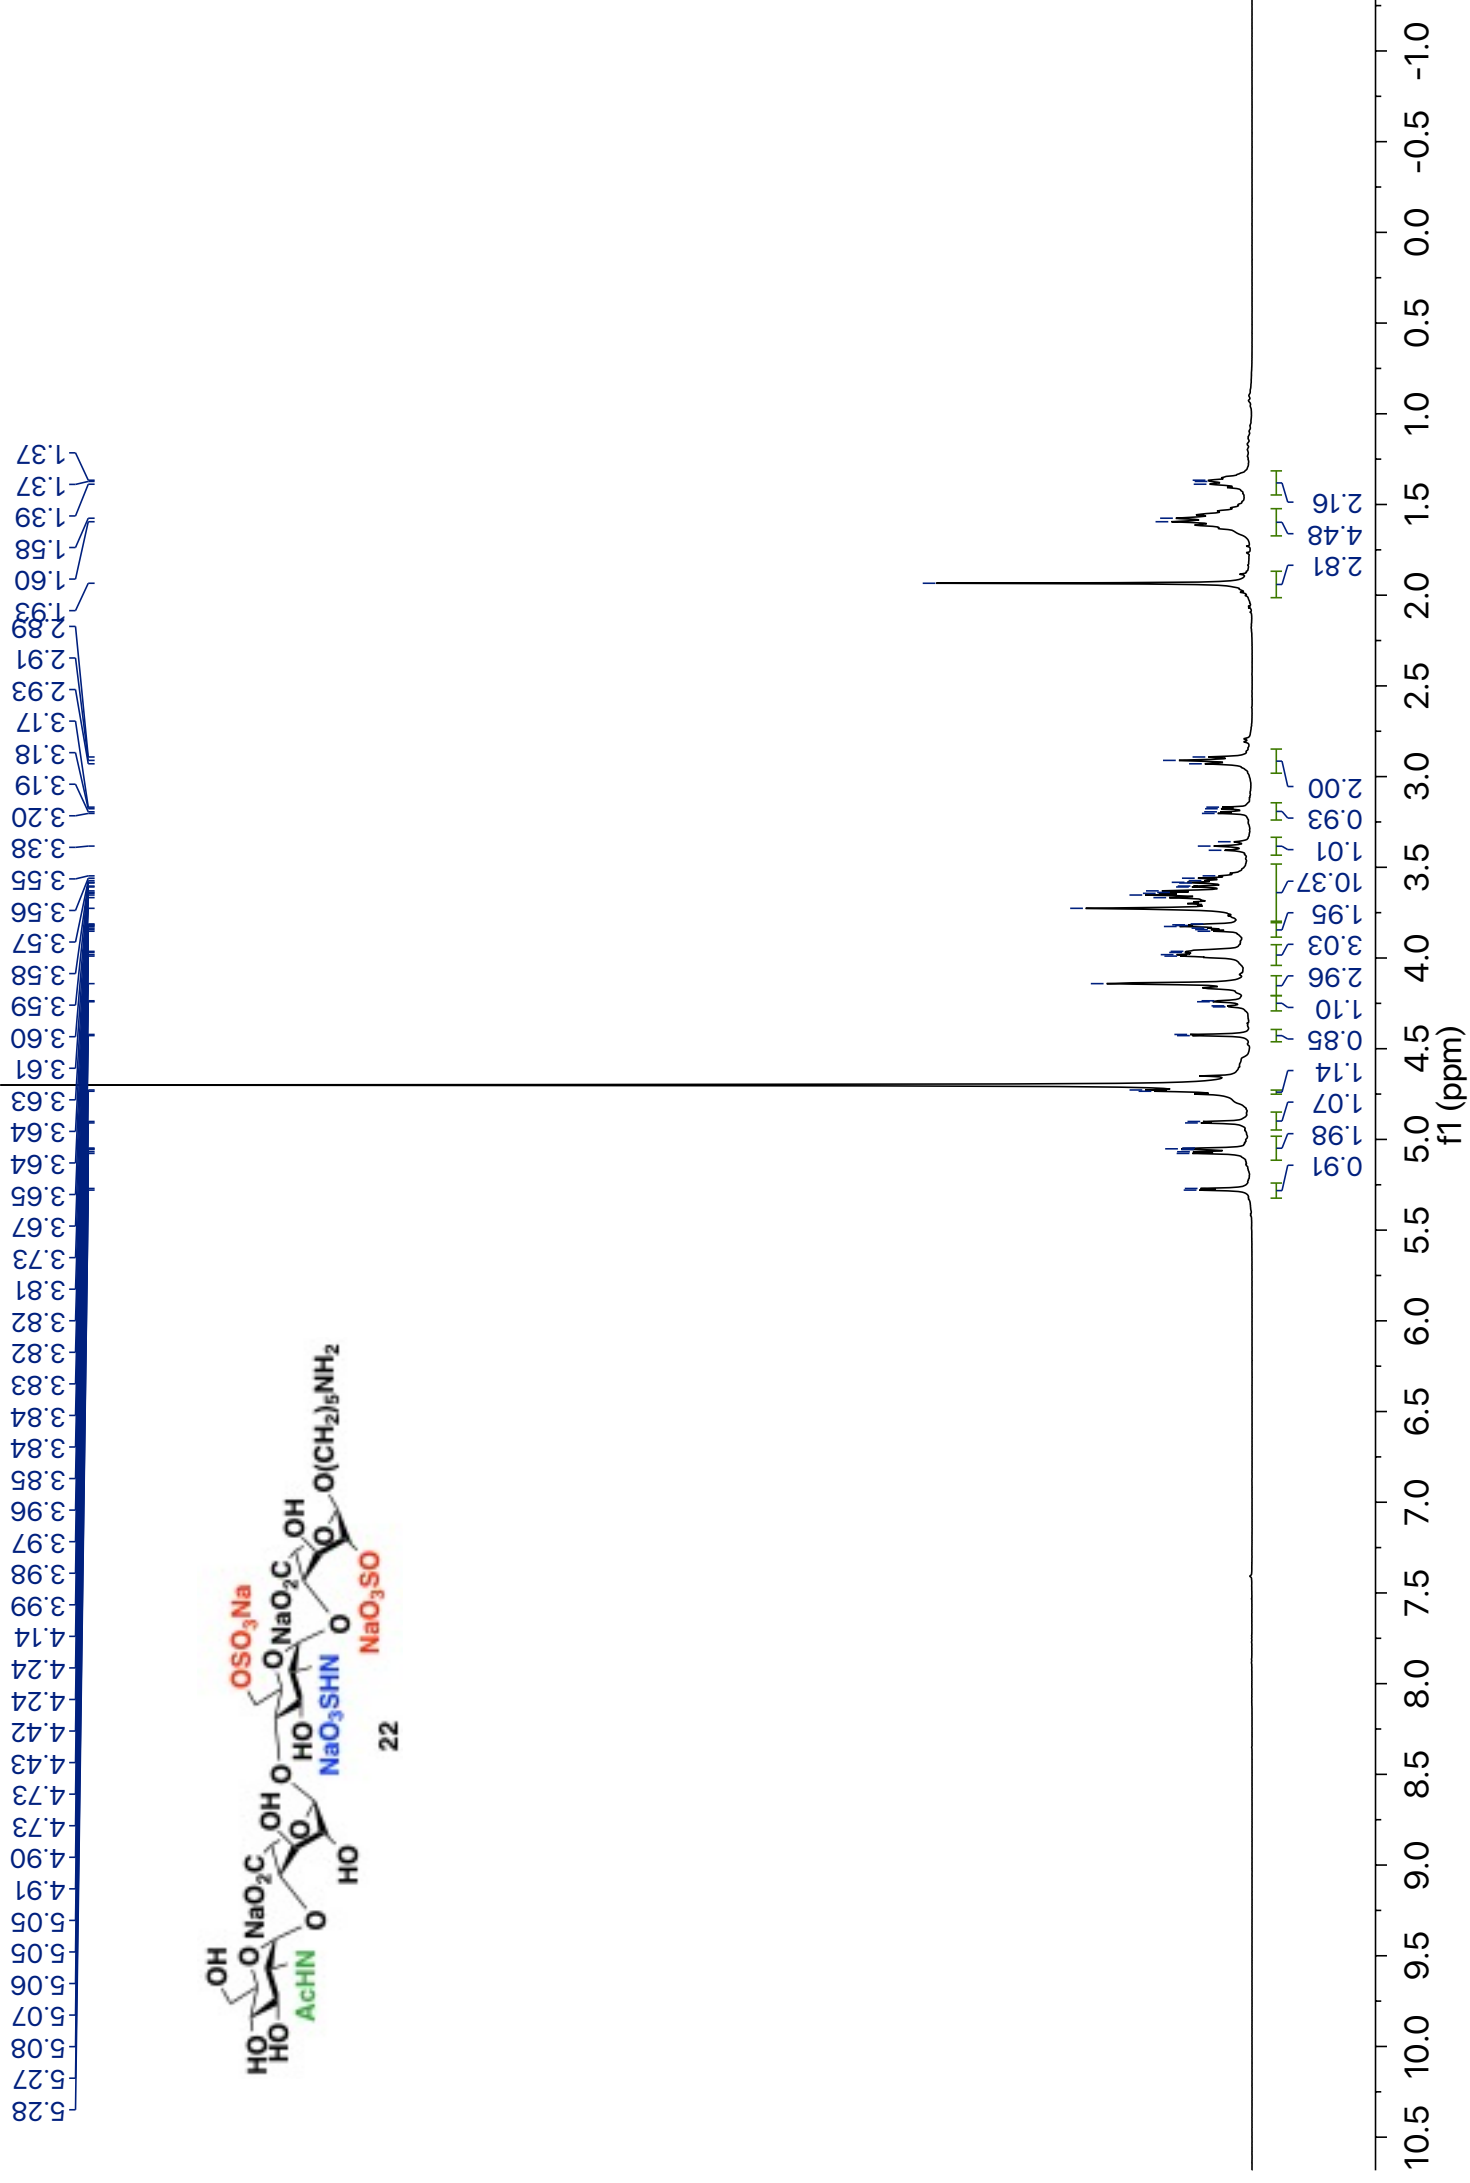

WL-2-267-D-NAc-B-NS-6S-A-2S-C-TC.1.1.r —

175.07  
174.75  
174.46

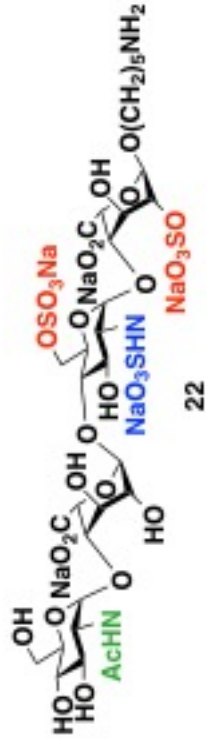

101.67  
98.68  
97.07  
94.37  
76.82  
75.94  
75.66  
73.89  
71.92  
71.12  
69.60  
69.31  
69.22  
69.05  
68.70  
68.33  
68.12  
68.08  
66.22  
60.12  
58.03  
53.52  
39.38  
27.79  
26.21  
22.21  
21.93

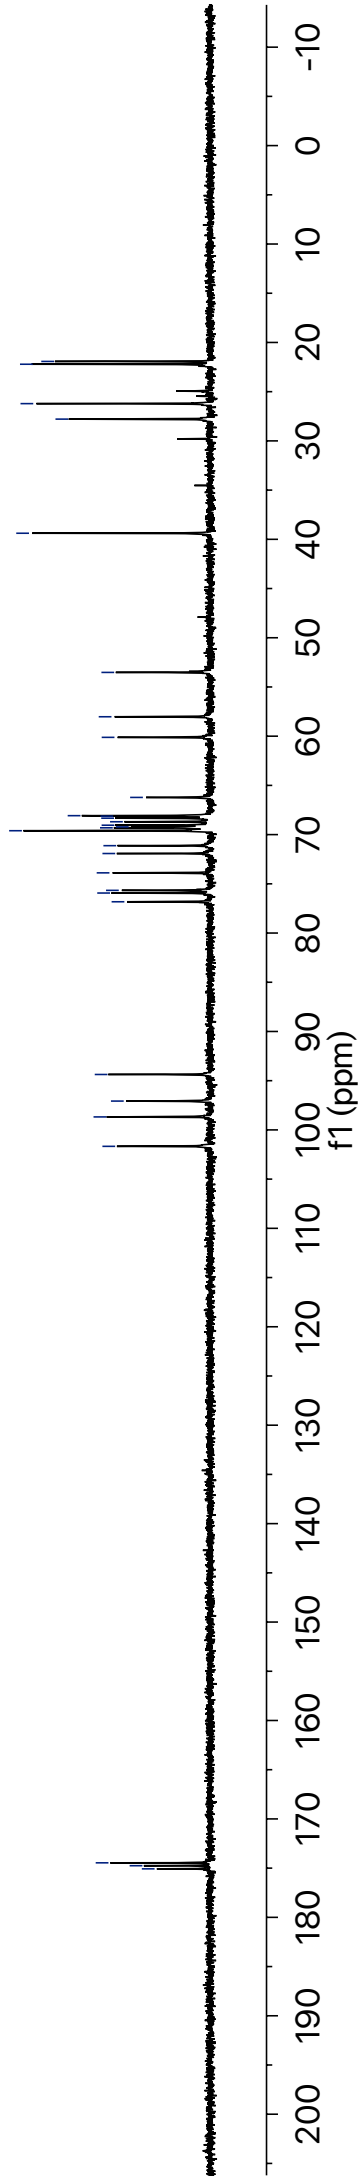

WL-2-286-D-NS-B-BAC-6S-A-2S-H-TC.6.1.1r —

5.27  
5.26  
5.03  
4.90  
4.90  
4.47  
4.46  
4.23  
4.19  
4.18  
4.17  
4.16  
4.16  
4.14  
4.13  
4.13  
4.13  
4.03  
4.02  
3.99  
3.98  
3.97  
3.96  
3.96  
3.96  
3.95  
3.94  
3.93  
3.93  
3.92  
3.72  
3.71  
3.70  
3.69  
3.69  
3.68  
3.68  
3.68  
3.67  
3.66  
3.66  
3.65  
3.64  
3.64  
3.63  
3.57  
3.55  
3.54  
3.54  
3.52  
3.37  
3.37  
3.12  
3.11  
3.09  
3.08  
2.93  
2.91  
2.89  
1.97  
1.62  
1.60  
1.60  
1.58  
1.58  
1.39  
1.37  
1.37

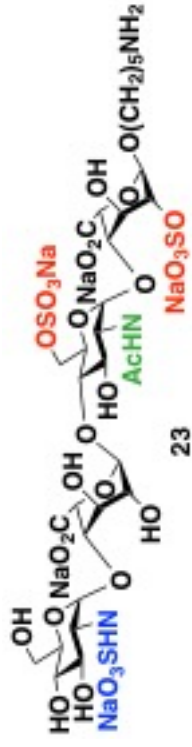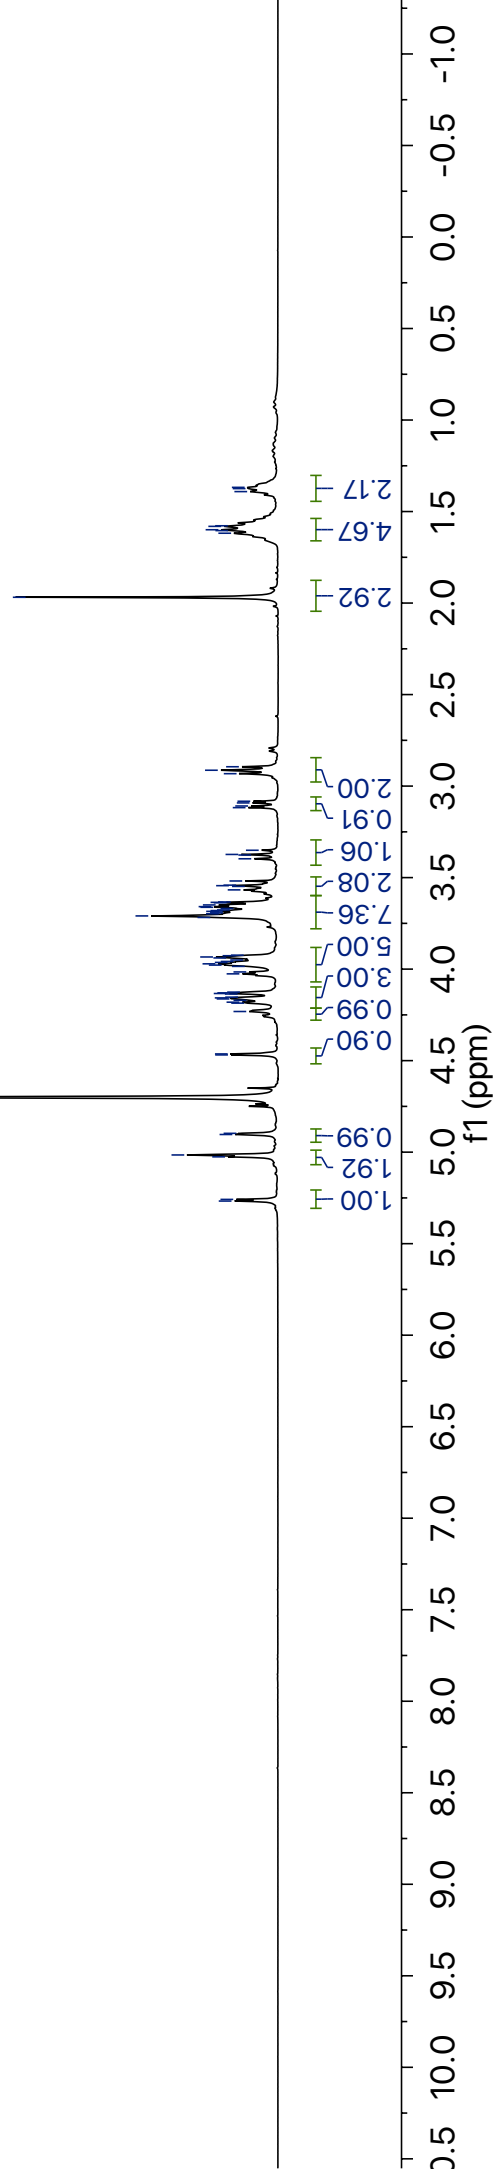



WL-2-286-D-NS-B-BAC-6S-A-2S-C-TC.1.1.r —

175.42  
175.22  
174.72

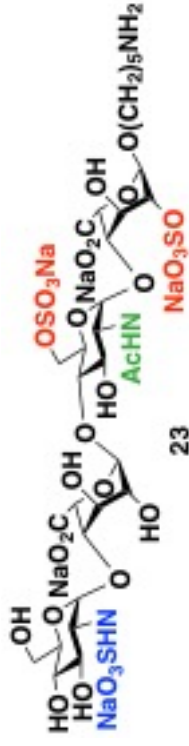

102.03  
98.51  
95.50  
93.68  
77.29  
74.38  
73.86  
71.63  
71.27  
70.99  
70.04  
69.69  
69.13  
68.66  
68.11  
67.91  
66.92  
66.23  
63.91  
60.15  
57.83  
53.42  
39.38  
27.78  
26.25  
22.28  
22.20

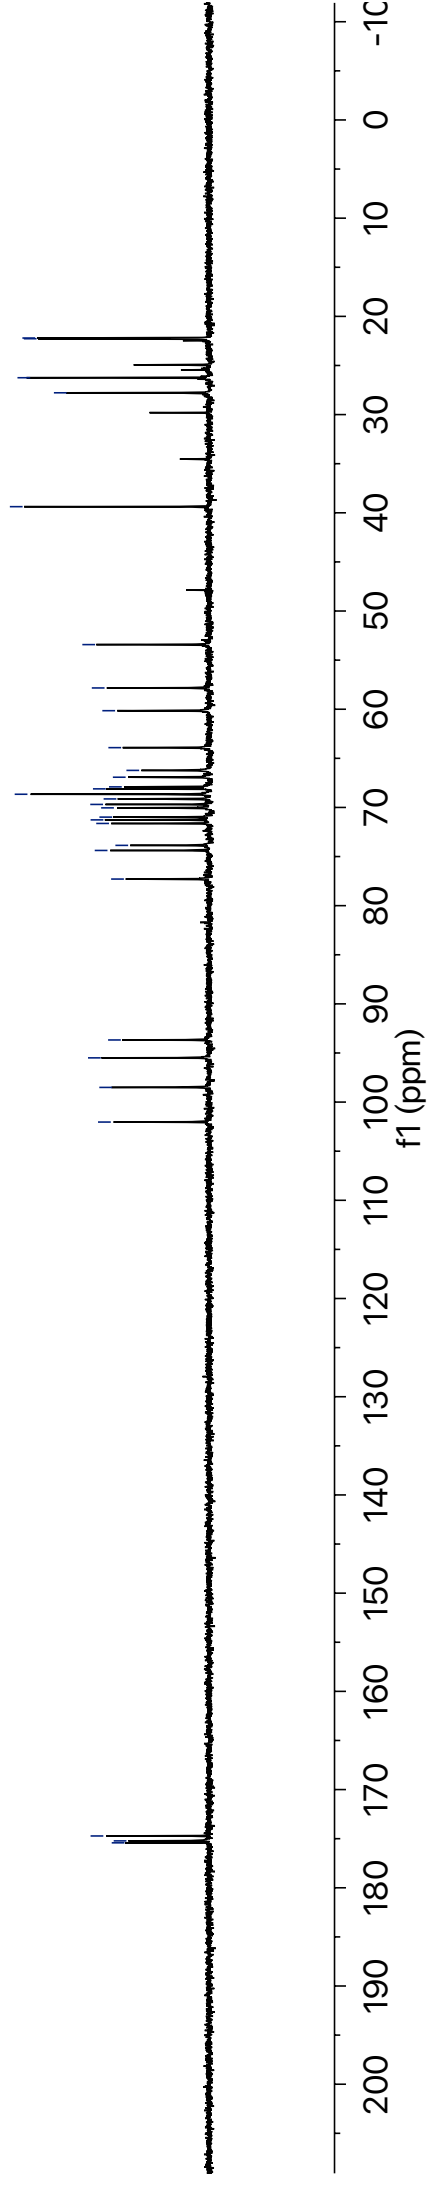

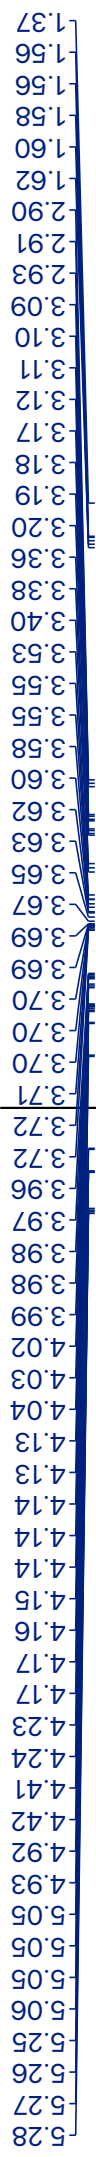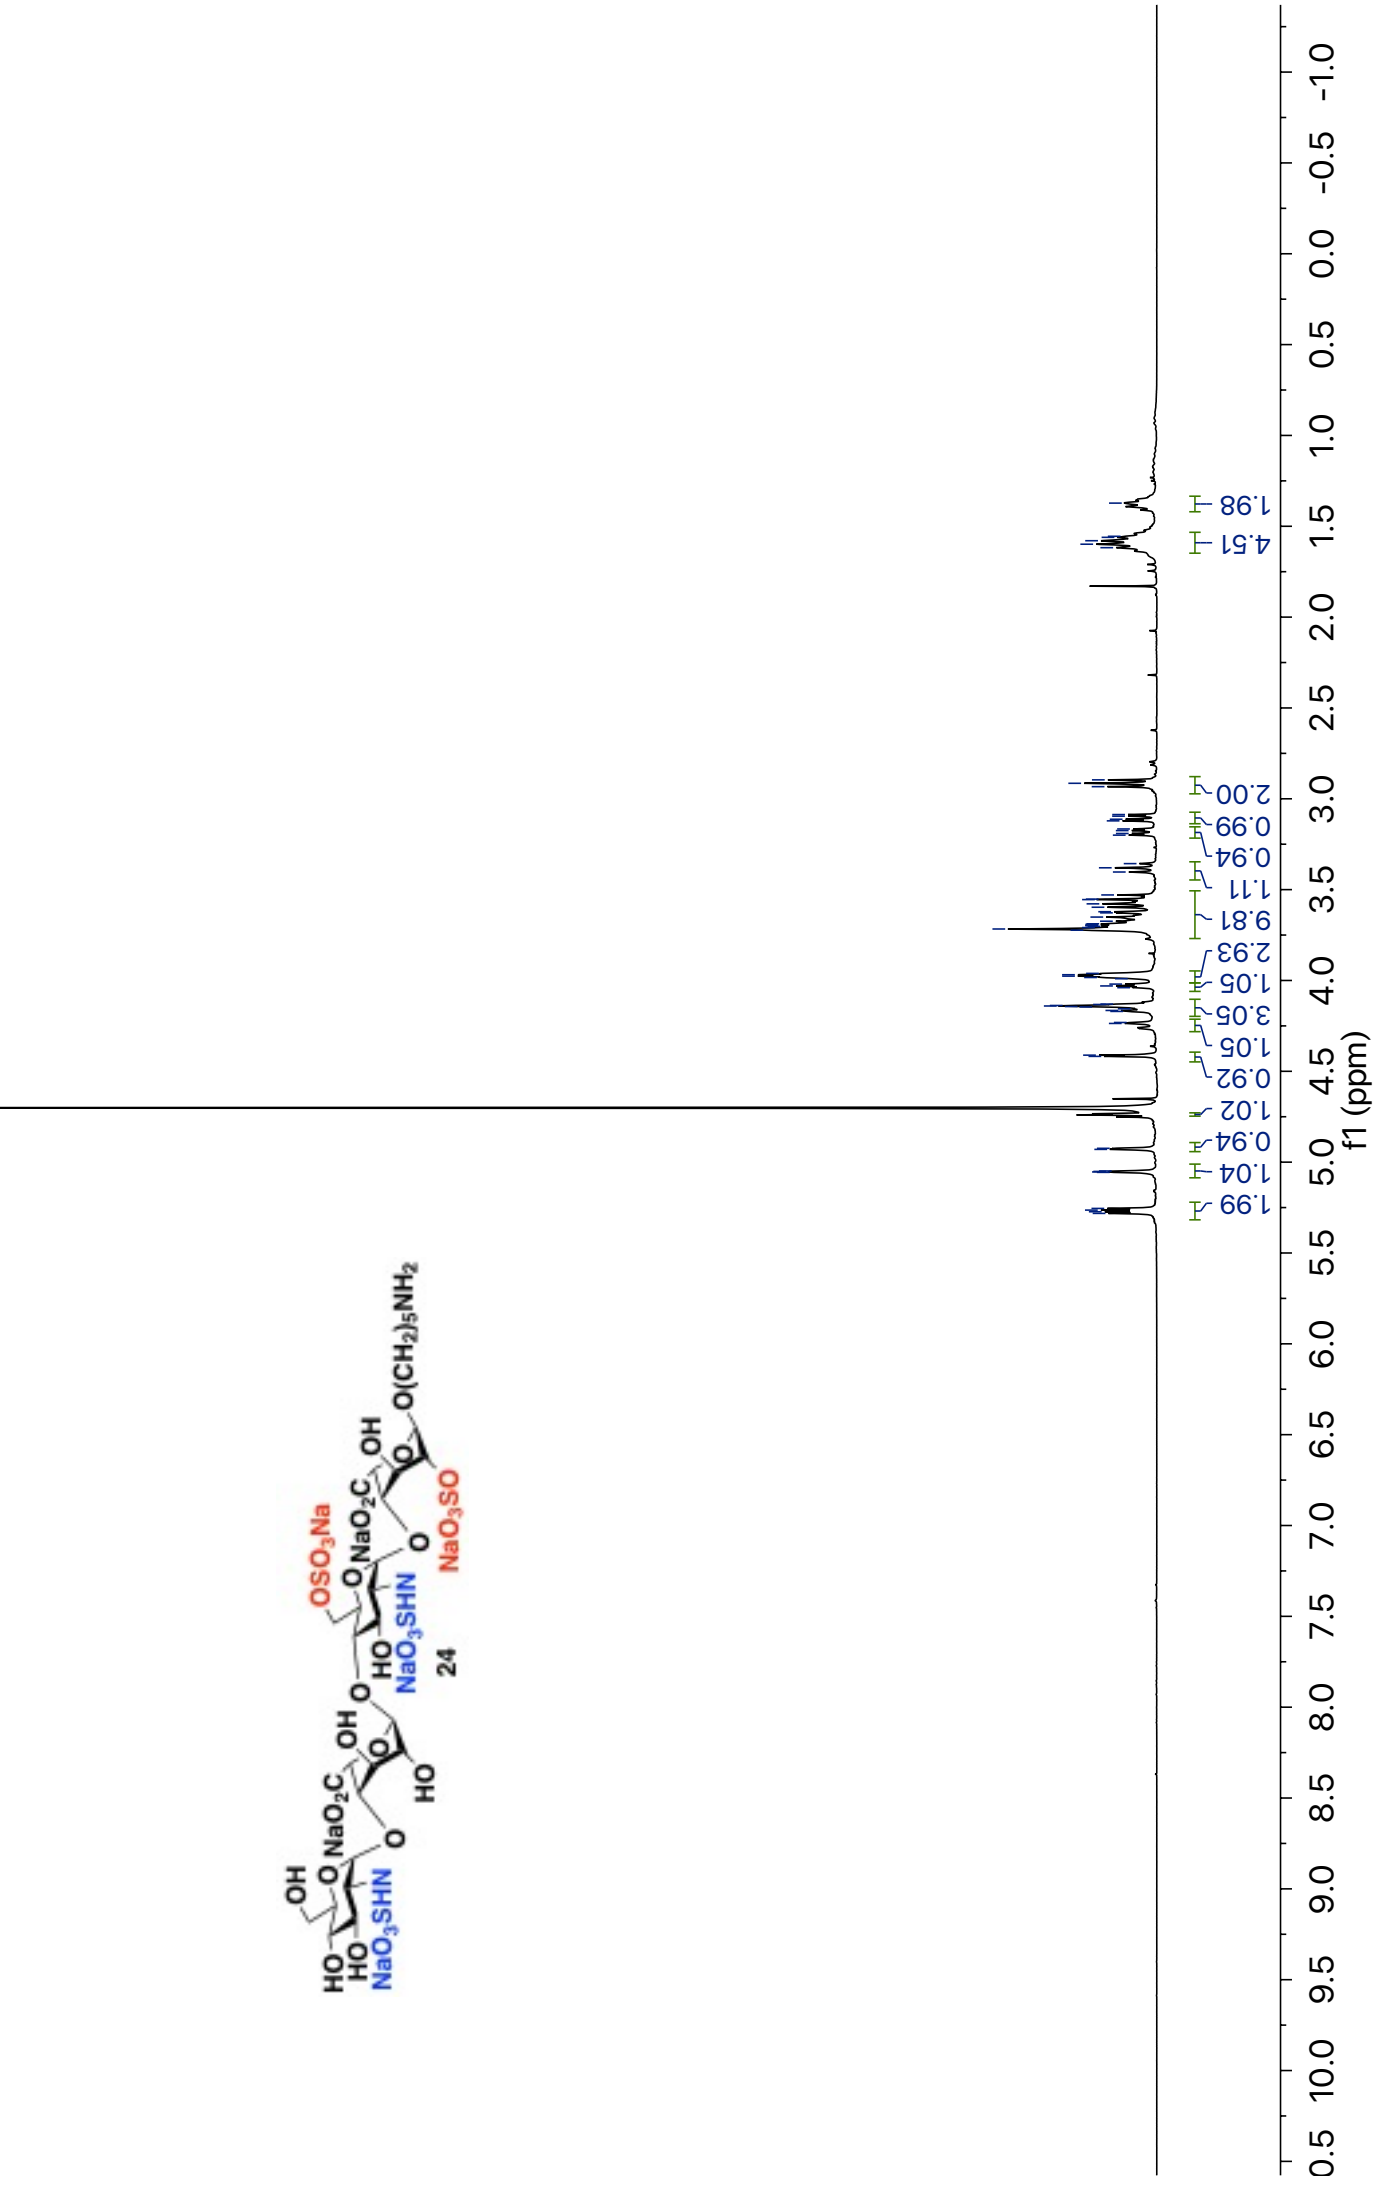

WL-2-284-D-NS-B-NS-6S-A-2S-C-TC.1.1r —

175.55  
174.84

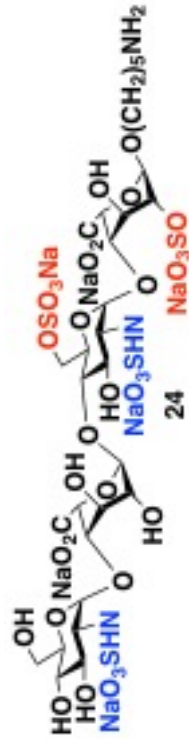

101.91  
98.70  
96.96  
95.52  
77.46  
75.86  
75.75  
74.30  
71.62  
71.28  
69.69  
69.63  
69.04  
68.55  
68.52  
68.42  
68.23  
68.06  
67.71  
66.27  
60.15  
58.08  
57.83  
39.39  
27.81  
26.21  
22.22

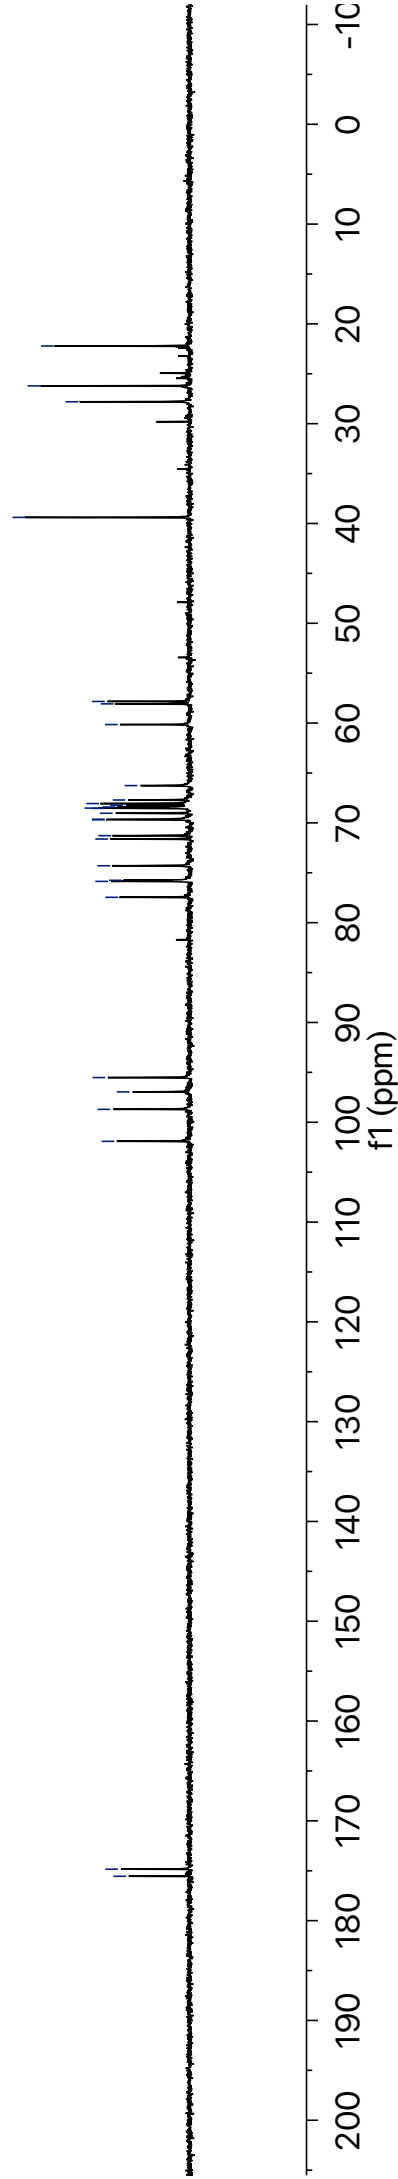

WL-2-137-D-NAc-C-2SO3-B-NAc-A-2SO3-H.1.1.r —

5.08  
5.02  
5.02  
5.01  
5.00  
4.82  
4.81  
4.45  
4.45  
4.24  
4.23  
4.20  
4.17  
4.13  
3.94  
3.93  
3.92  
3.92  
3.91  
3.89  
3.89  
3.87  
3.86  
3.78  
3.78  
3.78  
3.77  
3.71  
3.69  
3.66  
3.66  
3.64  
3.63  
3.63  
3.62  
3.60  
3.57  
3.39  
3.36  
3.34  
2.92  
2.91  
2.89

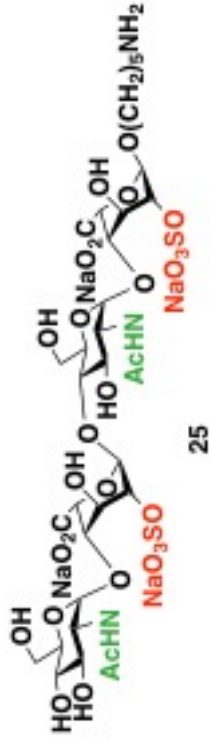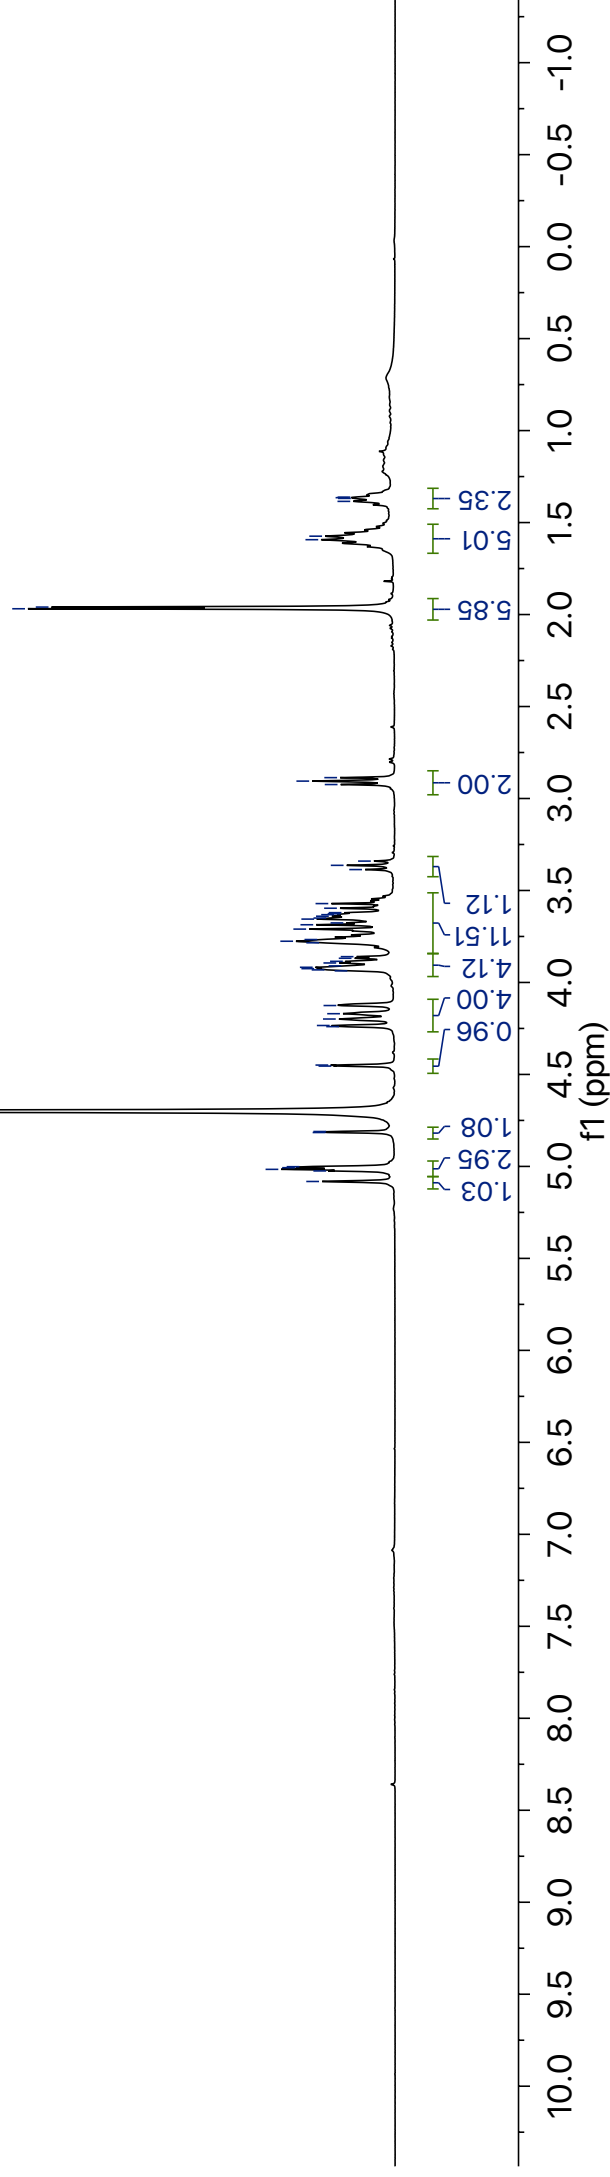

WL-2-137-D-Nac-C-2SO3-B-Nac-A-2SO3-C.1.1.1r

175.79  
175.21  
174.78  
174.71

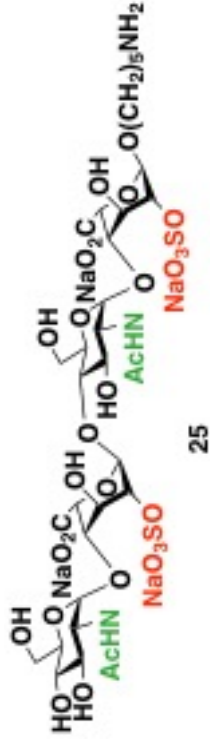

99.22  
98.52  
93.47  
77.23  
73.96  
73.22  
71.85  
71.29  
71.21  
70.68  
70.25  
69.86  
69.74  
68.09  
67.30  
67.06  
63.83  
63.18  
60.21  
59.67  
53.68  
53.35  
39.36  
27.77  
26.22  
22.24  
22.20  
22.15

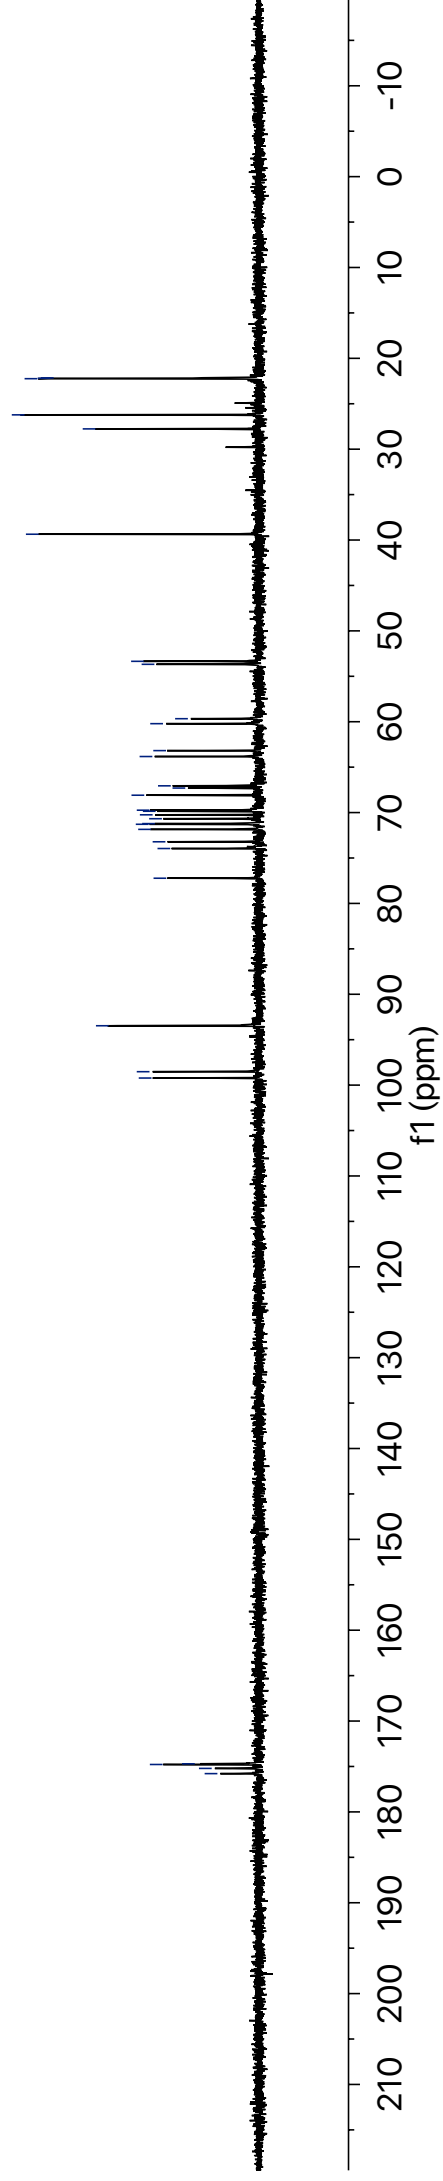

WL-2-133-D-NAc-C-2SO3-B-NSO3-A-2SO3-H.2.1.1r

4.86  
4.86  
5.01  
5.02  
5.03  
5.09  
5.28  
5.28  
4.40  
4.40  
4.24  
4.23  
4.23  
4.19  
4.13  
4.13  
3.96  
3.94  
3.78  
3.77  
3.77  
3.76  
3.75  
3.74  
3.72  
3.69  
3.63  
3.62  
3.62  
3.61  
3.60  
3.60  
3.59  
3.58  
3.37  
2.93  
2.91  
2.89  
1.97  
1.61  
1.59  
1.57

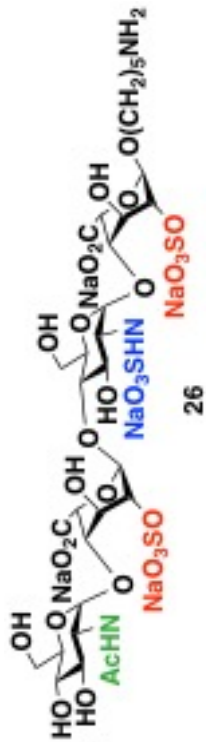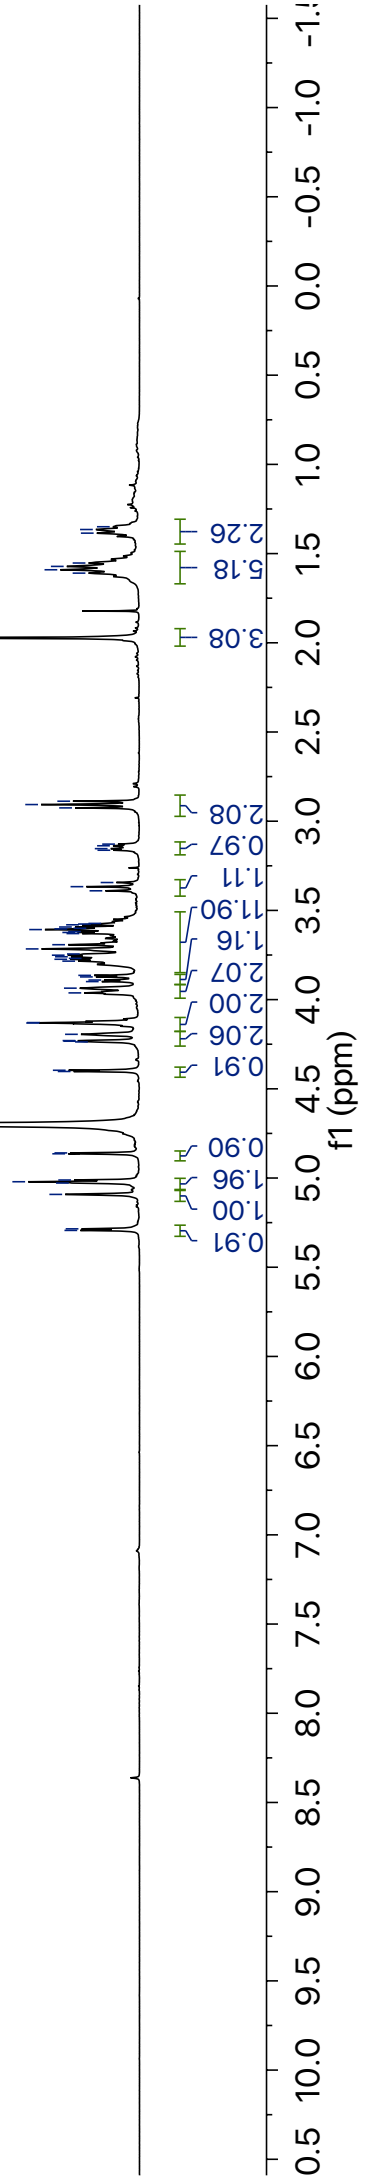

WL-2-133-D-NAc-C-2SO3-B-NSO3-A-2SO3-C.1.1.1r

175.86  
174.80

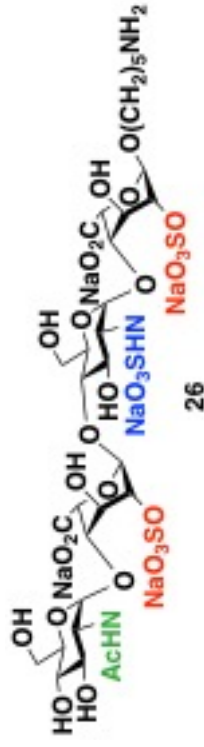

99.09  
98.85  
96.74  
93.48  
77.35  
76.22  
75.77  
73.19  
71.85  
71.29  
71.04  
70.27  
69.75  
69.50  
68.80  
68.60  
68.04  
67.31  
63.20  
60.22  
59.71  
58.32  
53.36  
39.38

27.80  
26.18  
22.20  
22.18

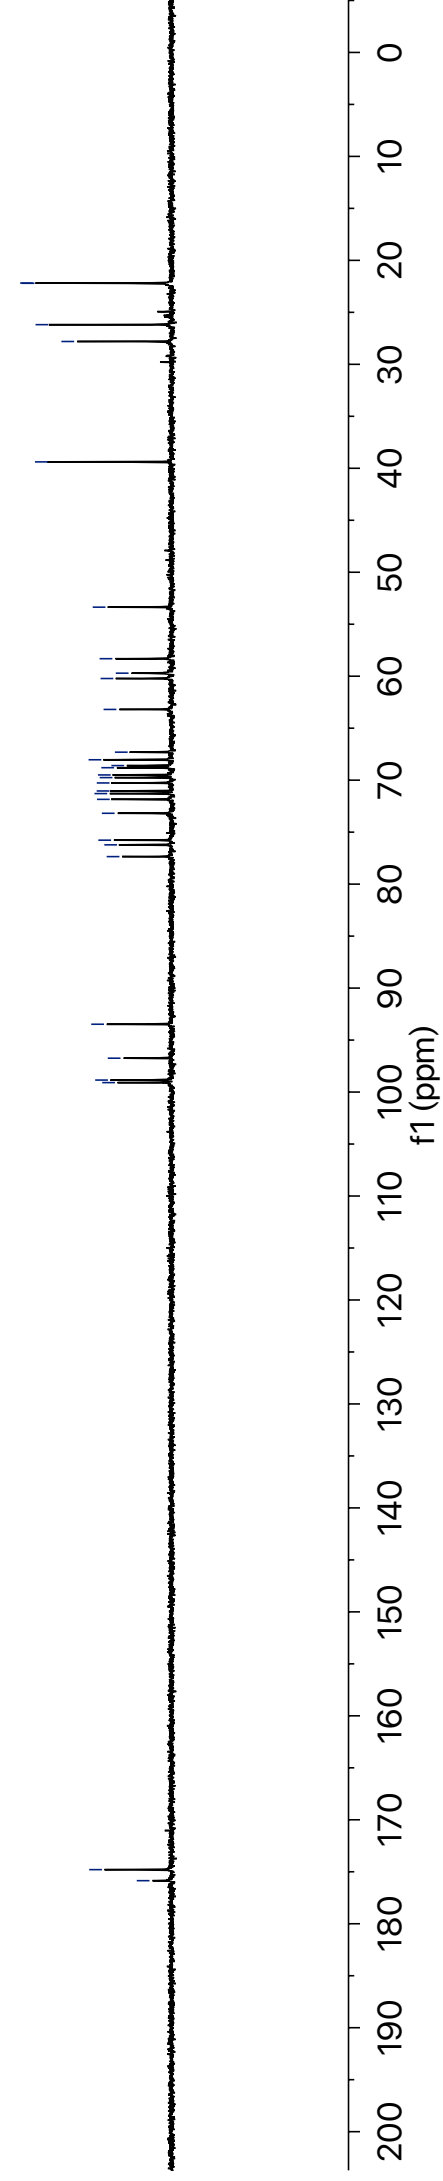

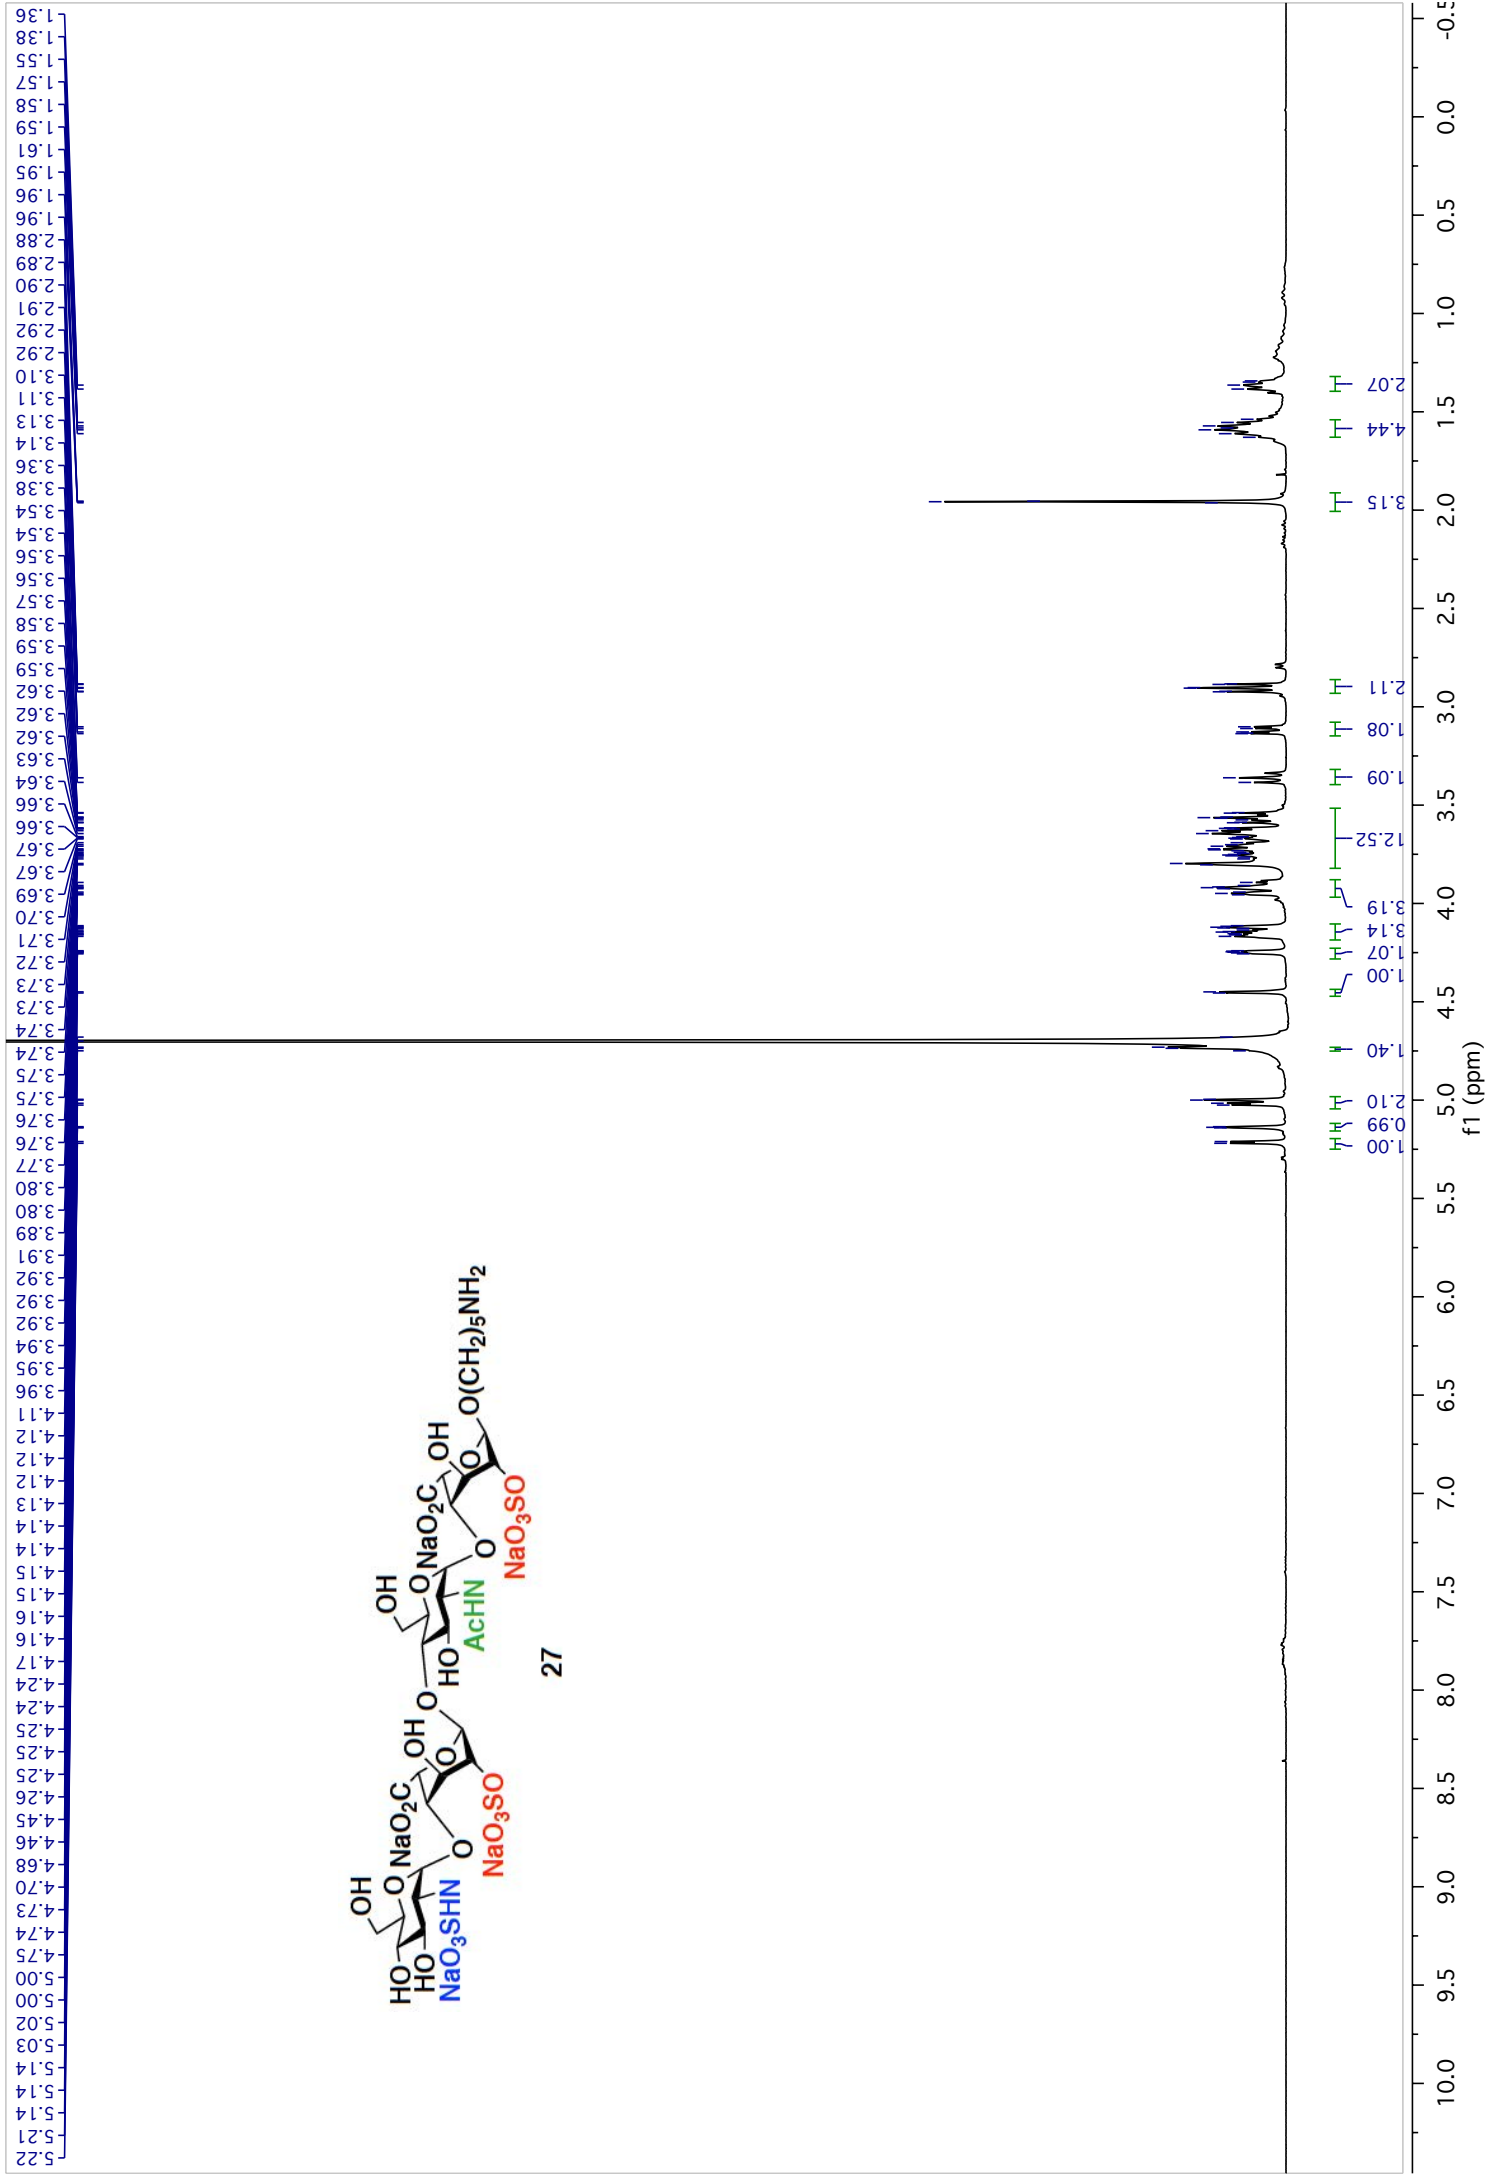



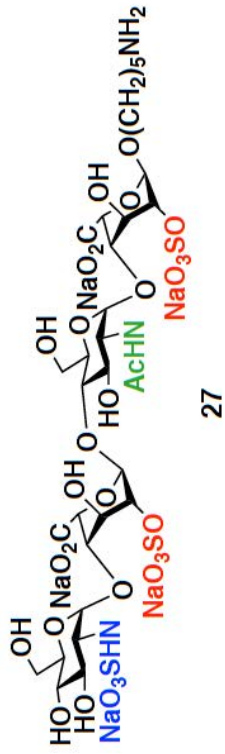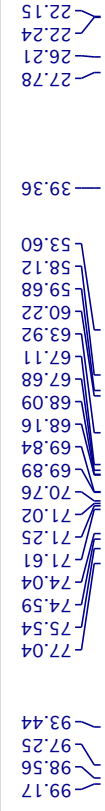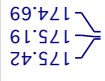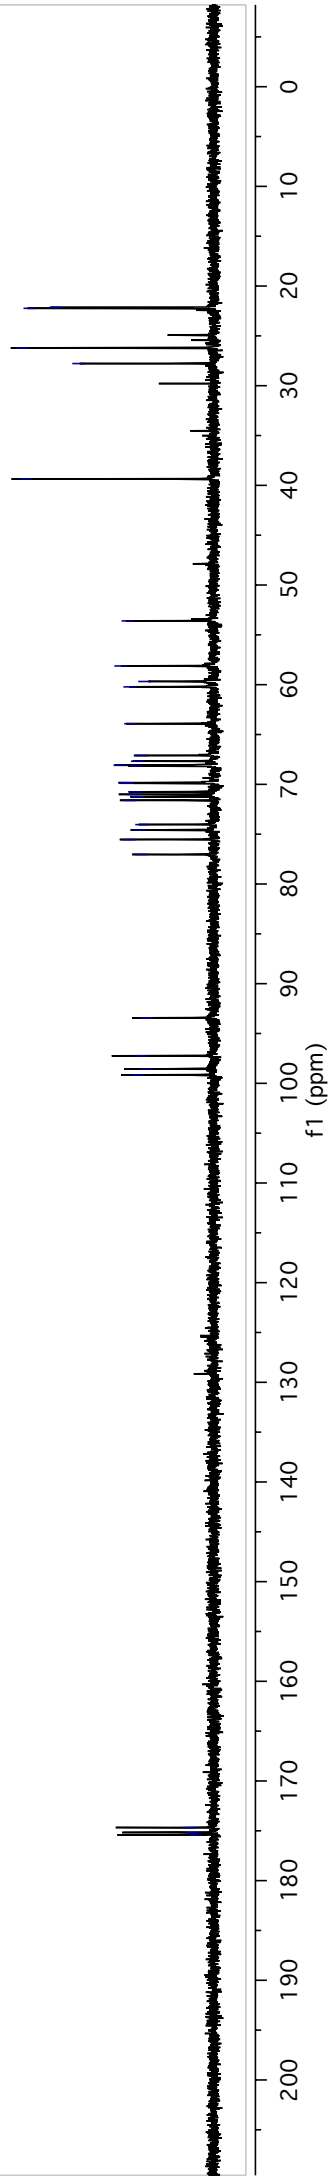

WL-2-317-D-NS-C-2S-B-NS-A-2S-H-TC.1.1r

5.30  
5.29  
5.22  
5.21  
5.16  
5.03  
5.03  
5.02  
5.02  
4.81  
4.80  
4.41  
4.41  
4.25  
4.24  
4.13  
4.13  
3.96  
3.95  
3.78  
3.78  
3.73  
3.72  
3.71  
3.60  
3.60  
3.58  
3.57  
3.57  
3.55  
3.39  
3.38  
3.37  
3.35  
3.16  
3.16  
3.14  
3.13  
3.13  
3.12  
3.11  
2.93  
2.91  
2.89  
1.59  
1.57  
1.39  
1.37

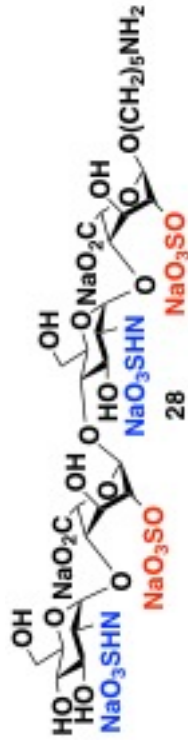

1.05  
1.08  
1.12  
1.22  
1.31  
0.94  
0.97  
3.08  
2.08  
6.36  
5.92  
1.14  
2.21  
2.00  
4.63  
2.16

f1 (ppm)

3.5 10.0 9.5 9.0 8.5 8.0 7.5 7.0 6.5 6.0 5.5 5.0 4.5 4.0 3.5 3.0 2.5 2.0 1.5 1.0 0.5 0.0 -0.5 -1.0

WL-2-317-D-NS-C-2S-B-NS-A-2S-C-TC.12.1.1r —

175.36  
174.69

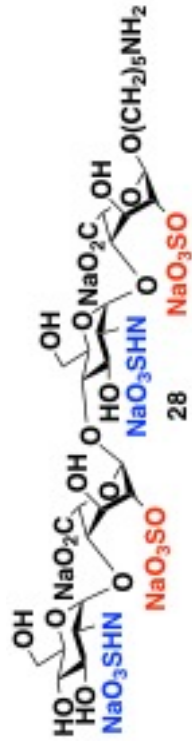

99.02  
98.89  
97.36  
96.74  
77.16  
76.31  
75.80  
75.54  
74.44  
71.65  
71.07  
71.01  
69.87  
68.86  
68.64  
68.05  
67.56  
60.20  
59.69  
58.23  
58.11  
39.38  
27.81  
26.17  
22.18

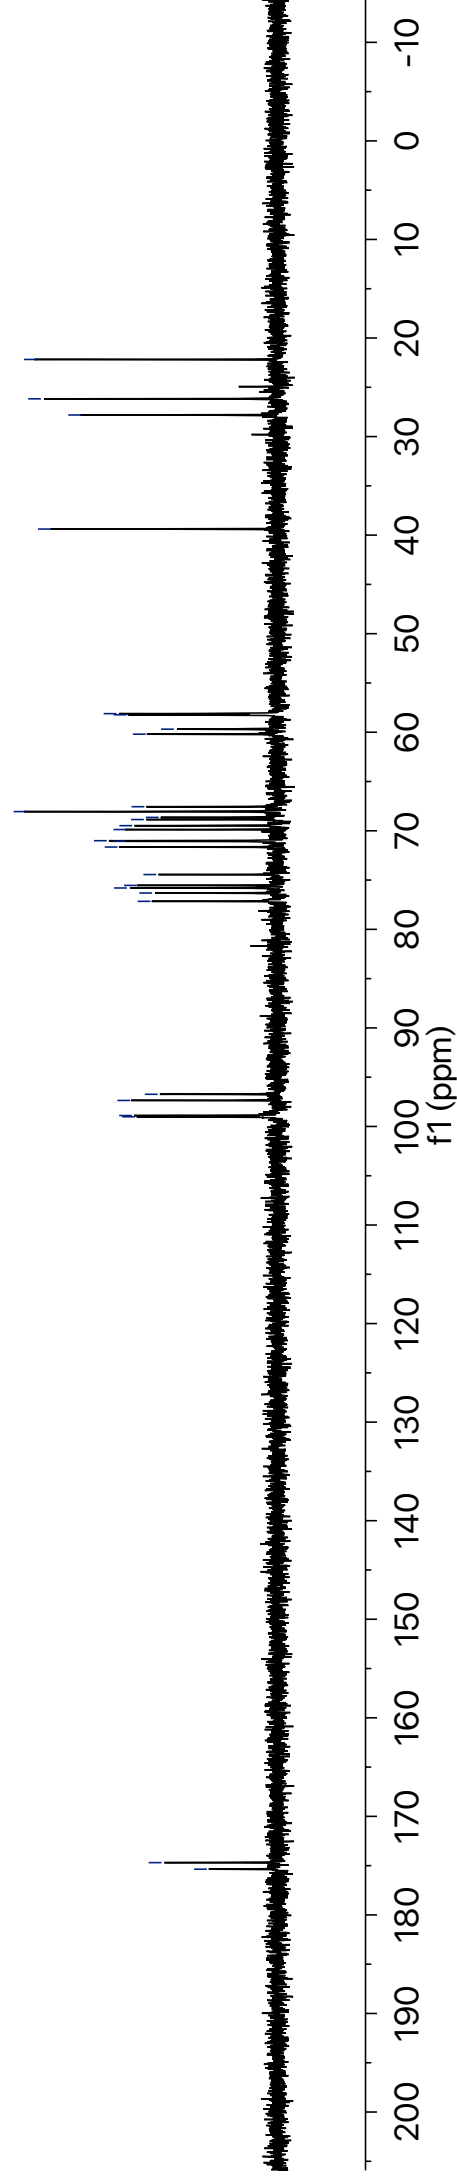

WL-2-265-D-NAc-6S-B-NAc-A-2S-H-TC.9.1.1r —

5.11  
5.10  
5.03  
5.02  
5.01  
4.82  
4.82  
4.67  
4.66  
4.46  
4.45  
4.25  
4.16  
4.15  
4.14  
4.13  
4.13  
4.12  
4.01  
4.00  
3.93  
3.93  
3.92  
3.92  
3.91  
3.90  
3.88  
3.88  
3.86  
3.85  
3.79  
3.78  
3.65  
3.64  
3.64  
3.63  
3.62  
3.61  
3.60  
3.59  
3.59  
3.50  
3.48  
2.93  
2.91  
2.89  
2.62  
1.97  
1.94  
1.62  
1.60  
1.58  
1.56  
1.37  
1.37

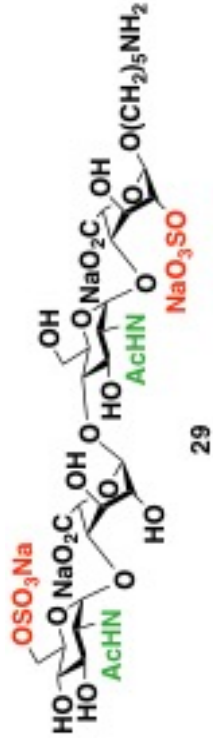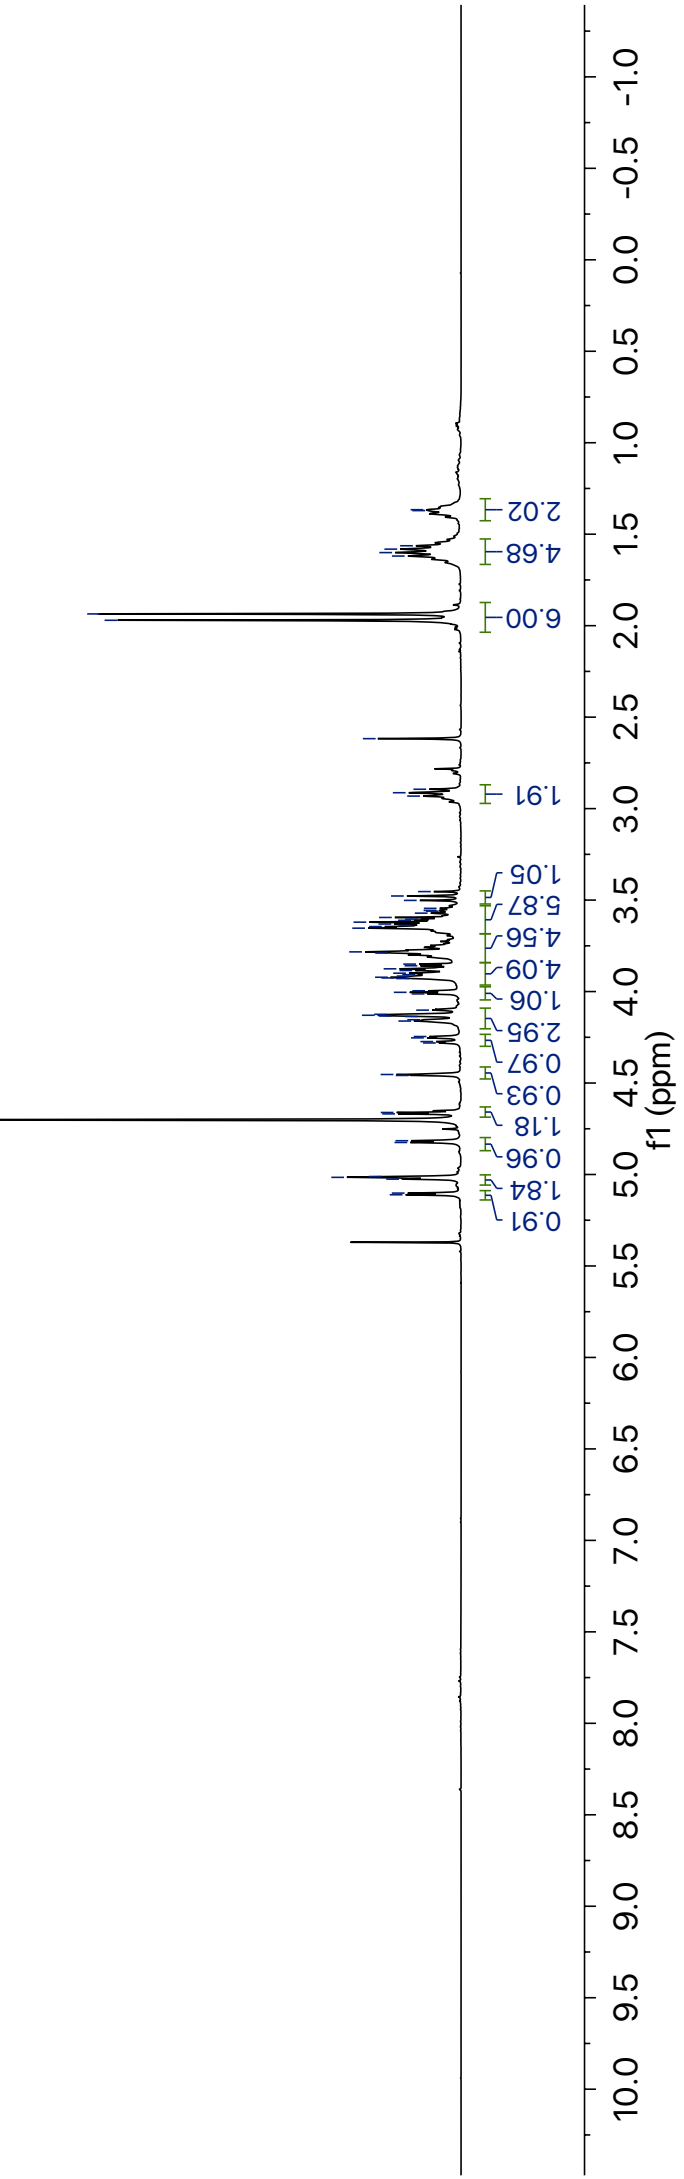

WL-2-265-D-NAc-6S-B-NAc-A-2S-C-TC.1.1.r —

175.23  
174.88  
174.72  
174.36

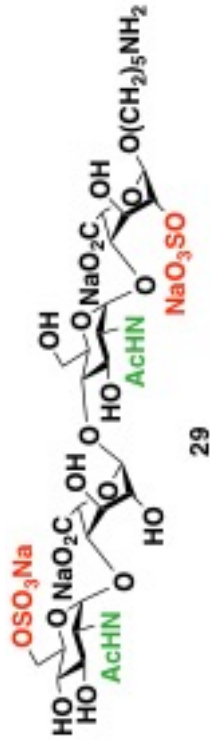

101.63  
98.49  
94.39  
93.69  
76.65  
74.40  
73.93  
71.06  
70.98  
70.94  
70.11  
69.81  
69.56  
69.06  
68.10  
67.01  
66.40  
64.00  
59.71  
53.51  
53.36  
39.37  
27.75  
26.25  
24.93  
22.27  
22.24  
22.18  
21.89

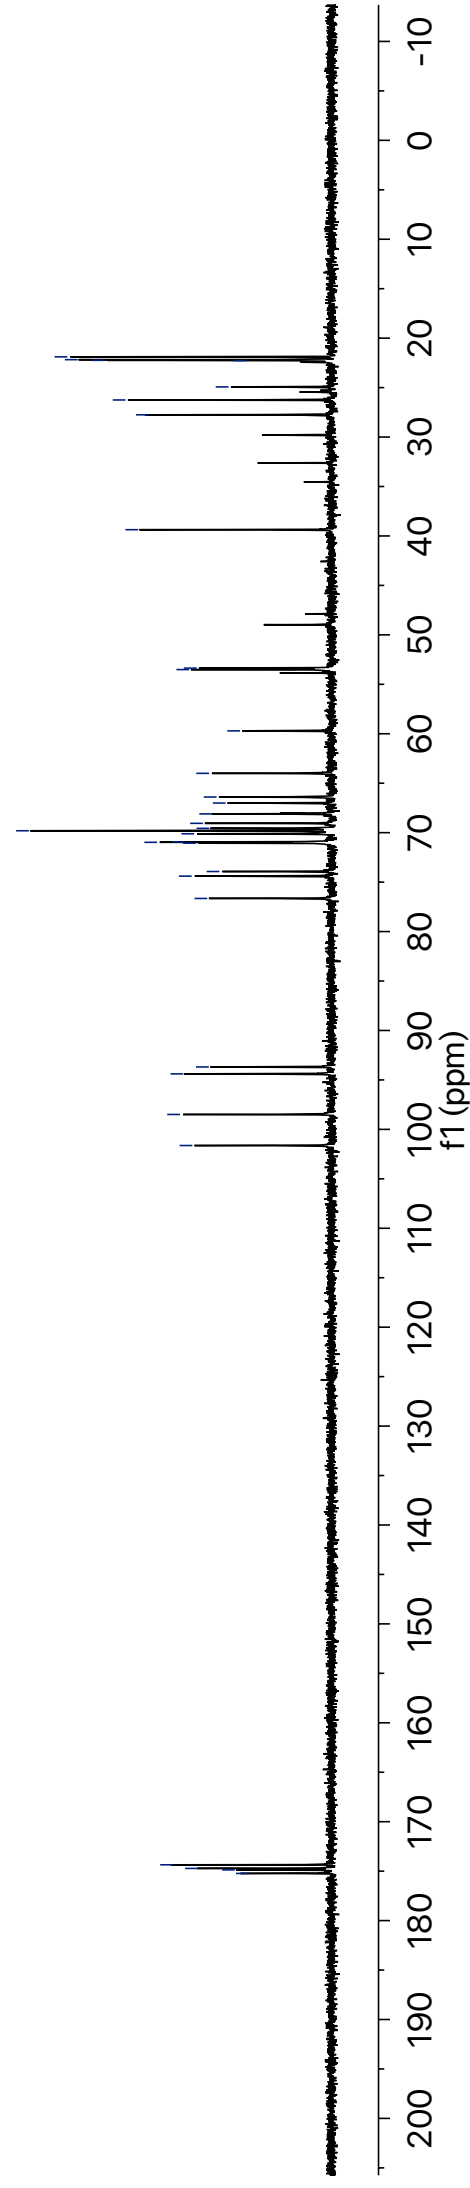

5.27 5.27 5.10 5.09 5.04 5.03 5.03 4.83 4.82 4.40 4.39 4.28 4.27 4.25 4.24 4.13 4.13 4.09 4.09 3.99 3.98 3.95 3.95 3.89 3.87 3.87 3.85 3.84 3.79 3.78 3.78 3.77 3.74 3.73 3.72 3.65 3.64 3.62 3.61 3.60 3.59 3.58 3.57 3.55 3.50 3.47 3.45 3.17 3.16 3.15 3.14 2.92 2.90 2.88 1.93 1.59 1.57 1.38 1.36

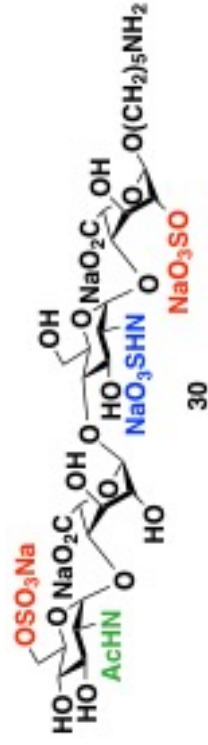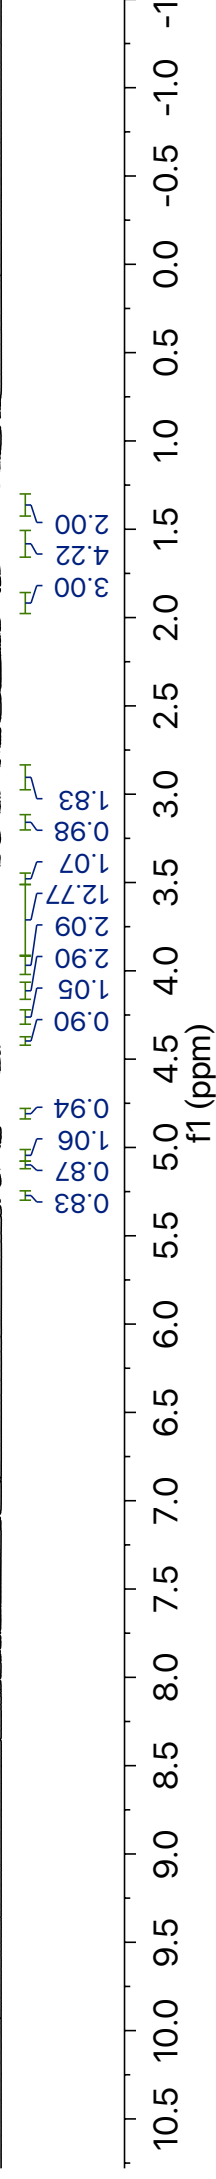

WL-2-259-D-NAc-6S-B-NS-A-2S-C-TC.1.1.1r —

174.97  
174.90  
174.36

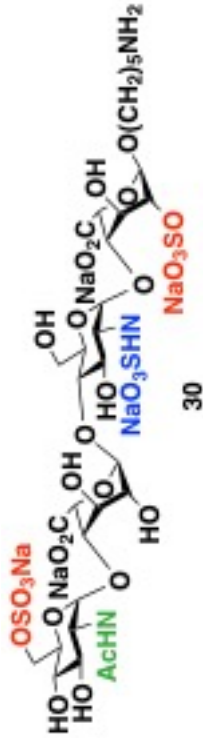

101.47  
98.71  
96.92  
94.41  
76.85  
75.89  
75.86  
74.37  
70.98  
70.90  
70.11  
69.79  
69.46  
69.04  
68.56  
68.36  
68.04  
66.38  
59.77  
58.15  
53.37  
39.38  
27.78  
26.21  
22.19  
21.89

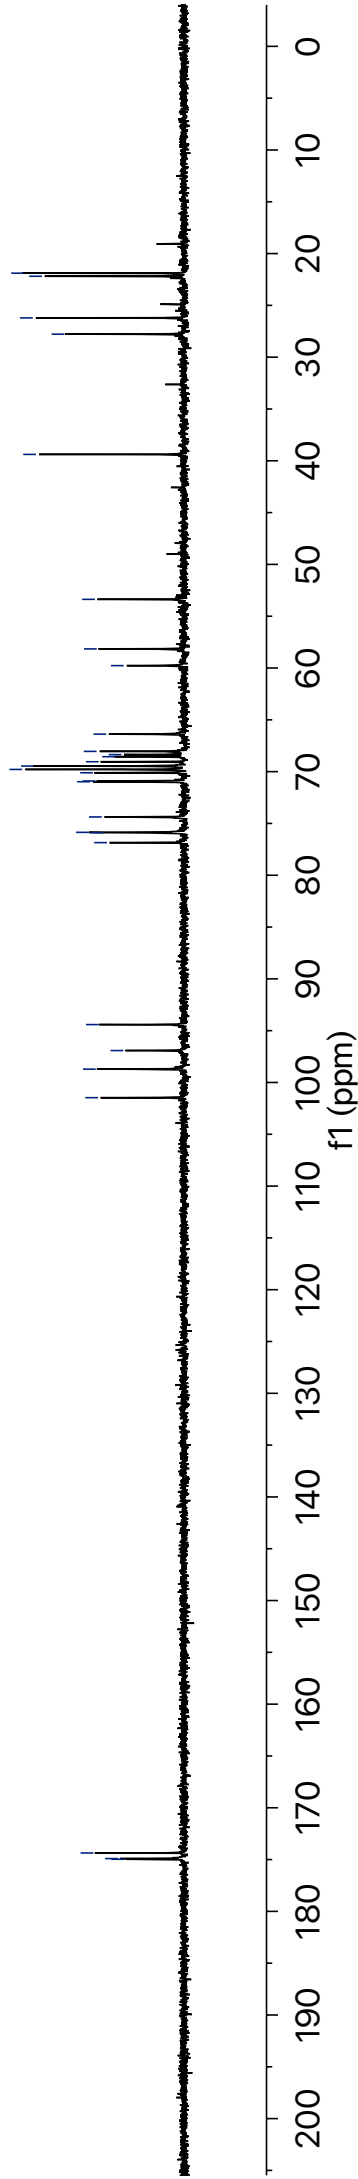





175.23  
175.11  
174.71

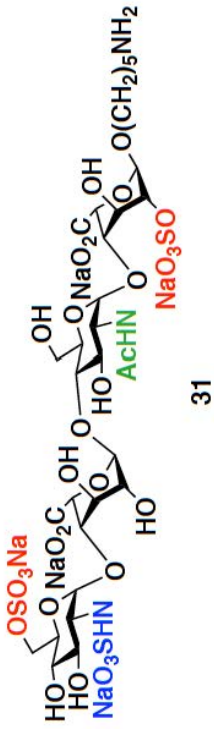

27.75  
26.23  
22.23

39.36

53.53  
57.68  
59.72  
64.01  
66.39  
67.04  
68.10  
68.83  
69.07  
69.28  
69.32  
69.84  
70.89  
71.09  
71.12  
73.98  
74.84  
76.86

93.63  
95.29  
98.52  
101.64

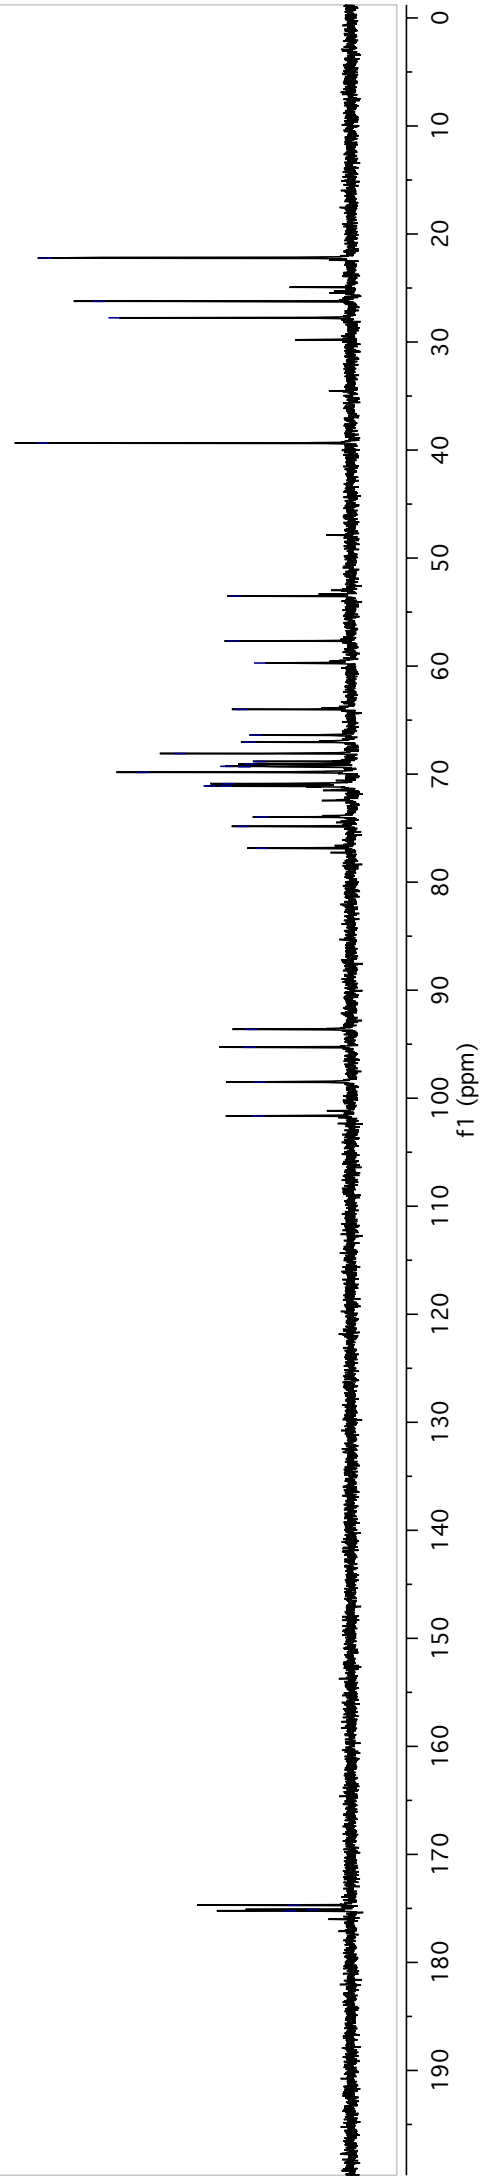

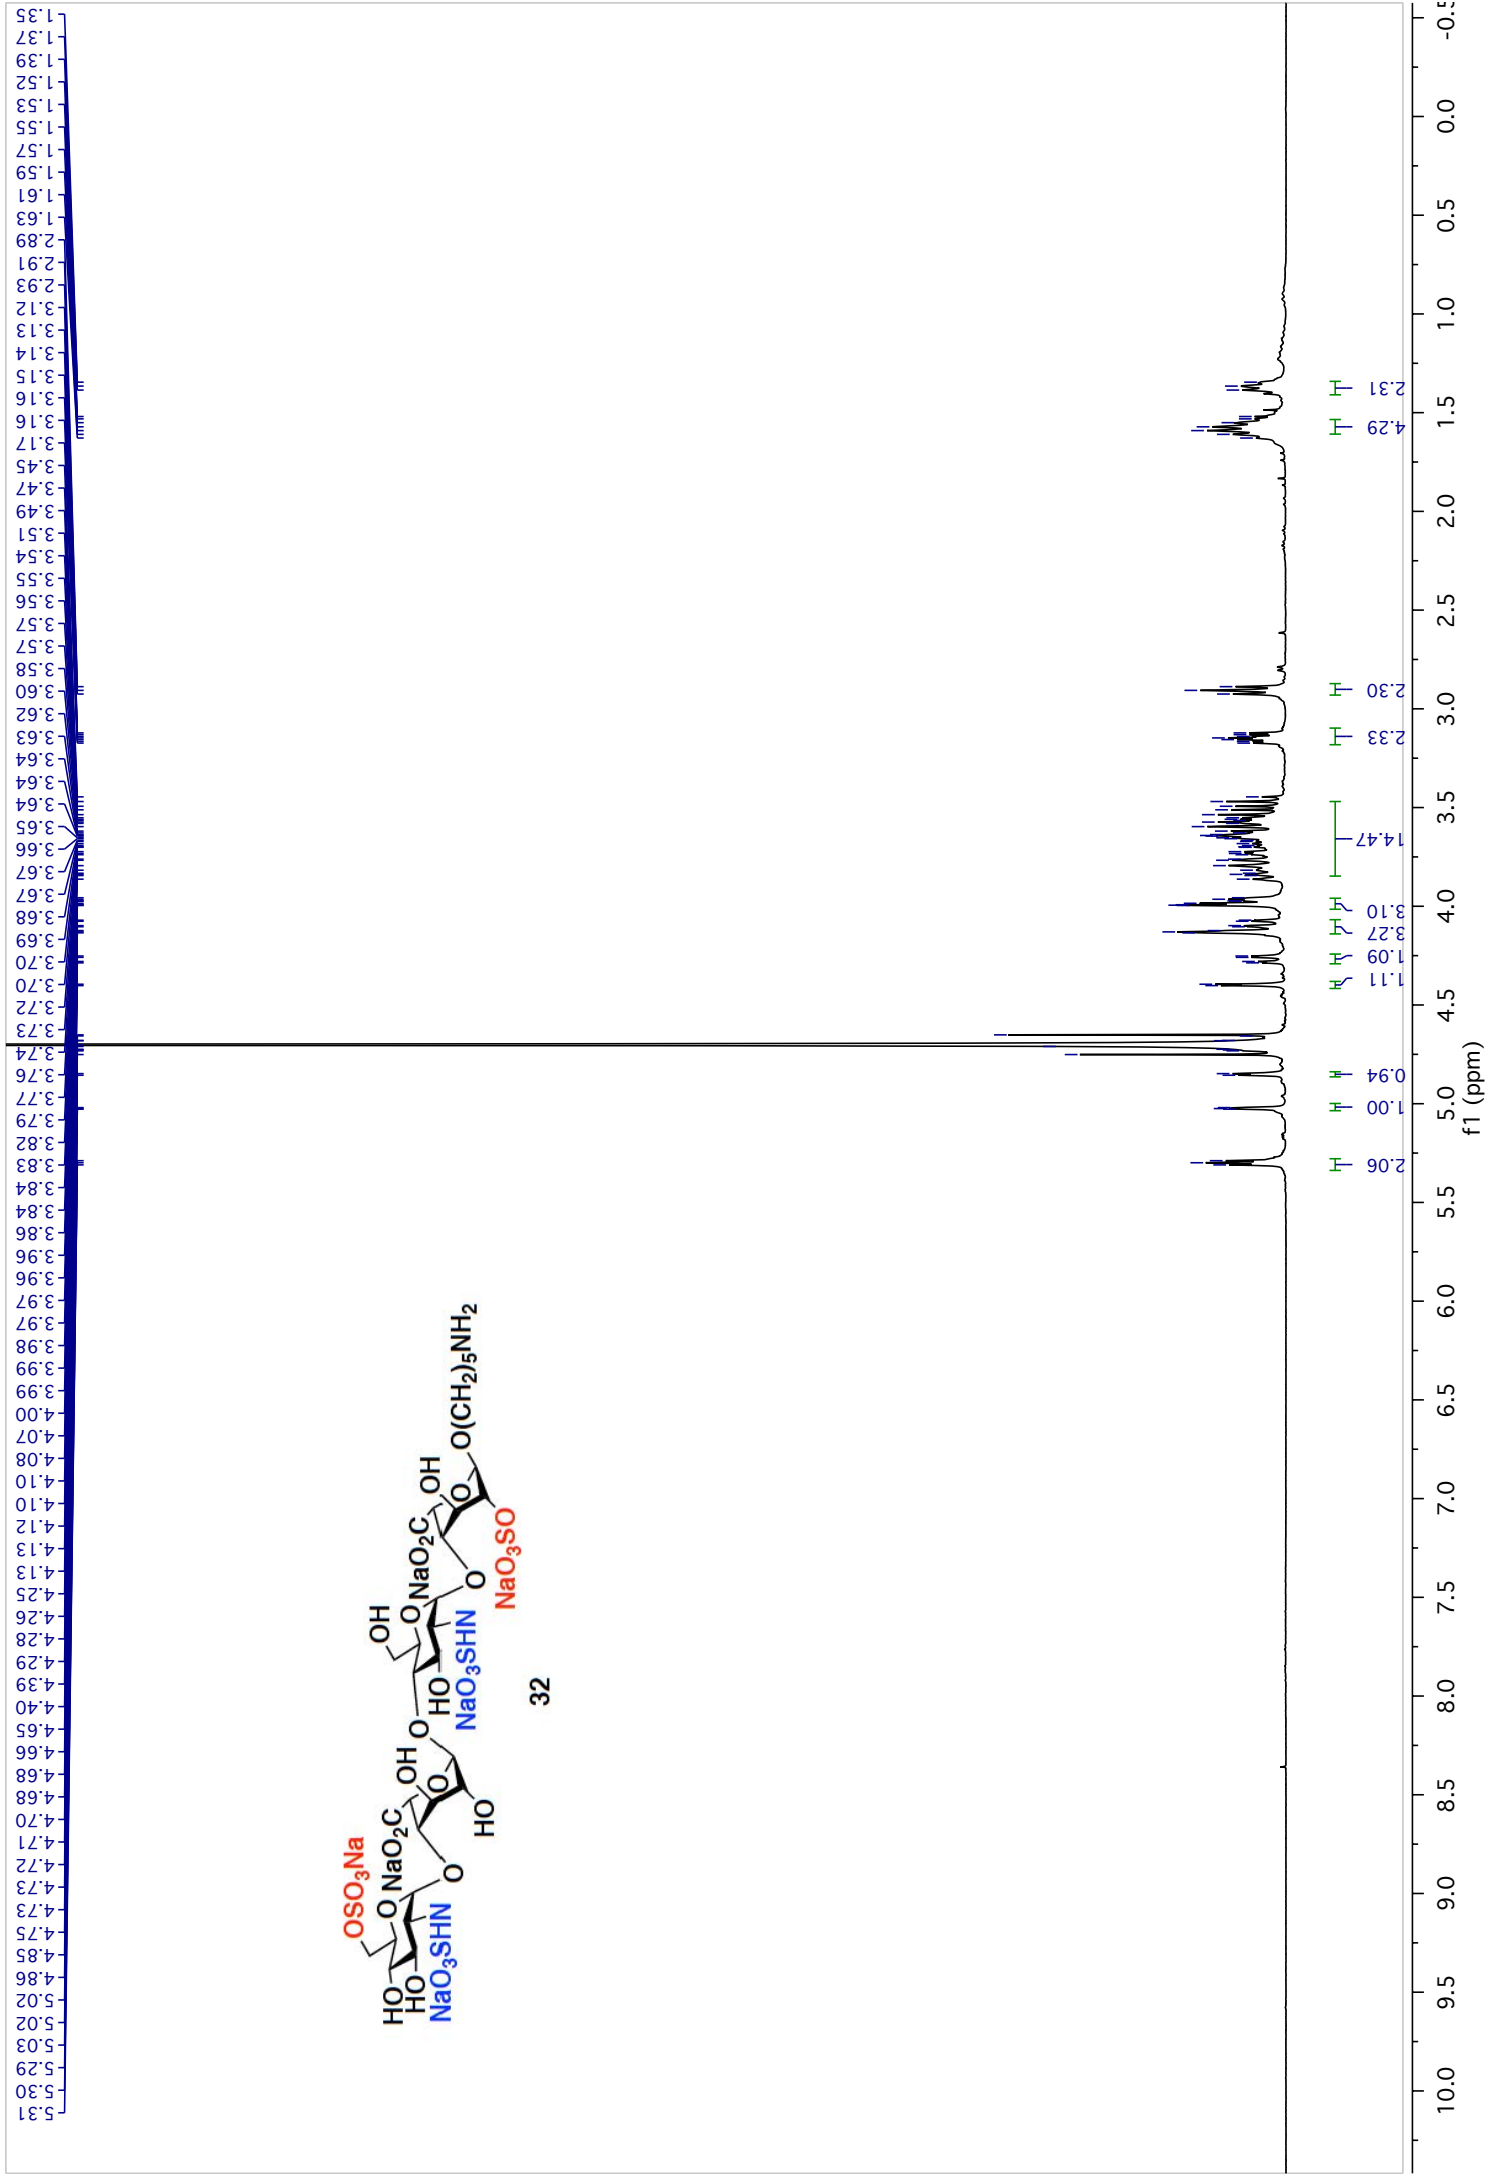

101.47  
98.85  
96.76  
95.35  
77.06  
76.27  
75.87  
74.83  
71.12  
70.93  
69.85  
69.48  
69.26  
69.06  
68.88  
68.74  
68.62  
68.02  
66.38  
59.80  
58.16  
57.69  
39.38  
27.78  
26.17  
22.16

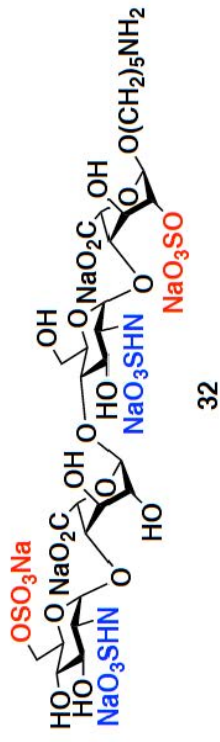

175.17  
174.81

f1 (ppm)

0

10

20

30

40

50

60

70

80

90

100

110

120

130

140

150

160

170

180

190

200

WL-2-184-D-NAC-C-2S-B-NAC-6S-A-2S-H-TC.7.1.r —

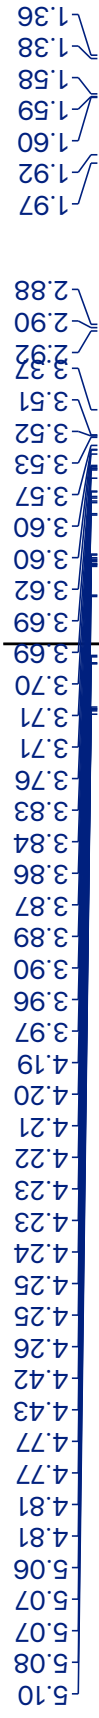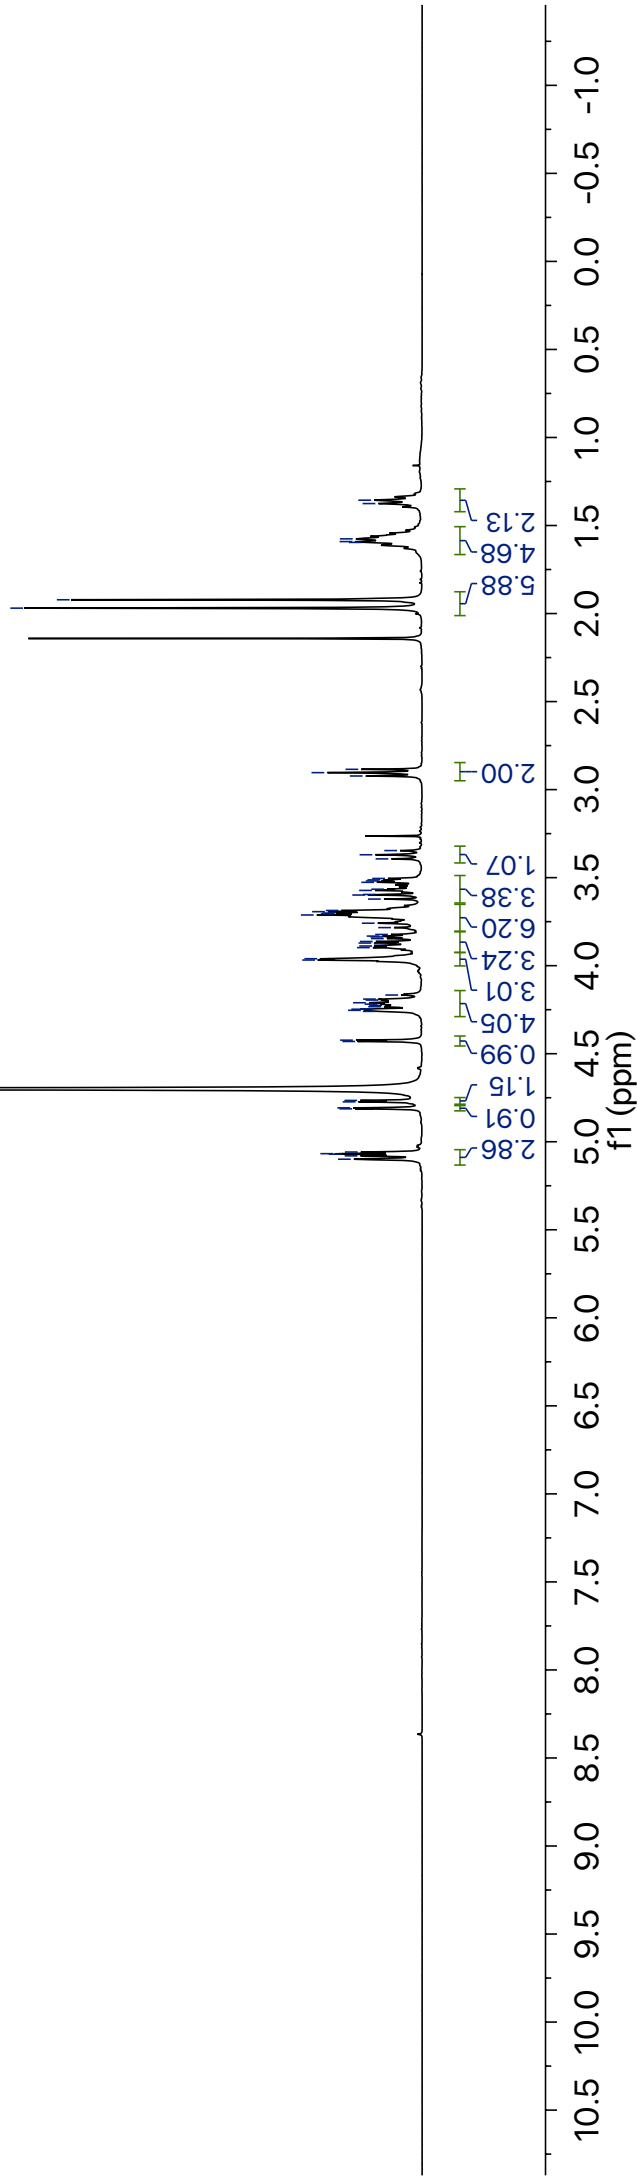

WL-2-184-D-NAc-C-2S-B-NAc-6S-A-2S-C-TC.1.1.r —

175.46  
174.92  
174.79  
174.31

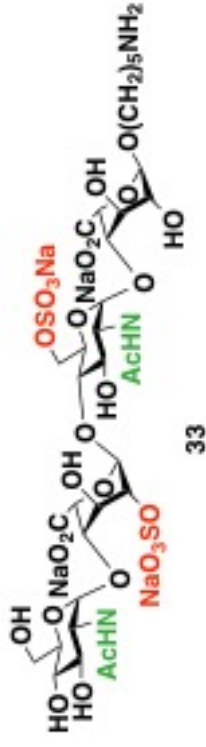

100.77  
99.09  
94.35  
93.54  
76.14  
73.92  
73.84  
71.89  
71.27  
70.76  
69.78  
69.73  
69.44  
69.30  
68.91  
68.67  
68.11  
67.89  
66.38  
64.05  
60.25  
53.56  
53.35

39.37  
30.23  
28.04  
26.25  
22.26  
22.20  
21.91

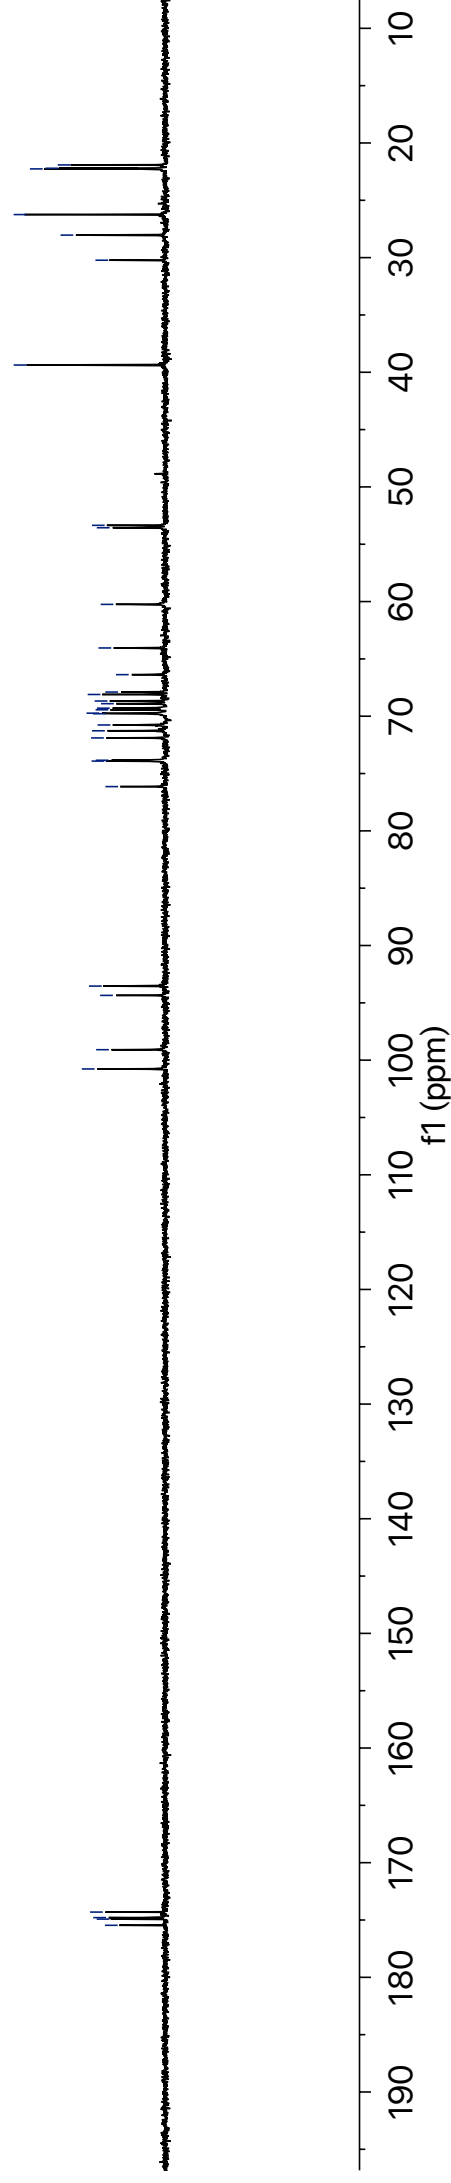

WL-2-185-D-NAc-C-2S-B-NS-6S-H-TC.7.1.1r

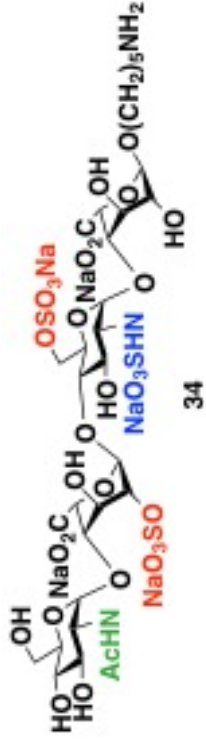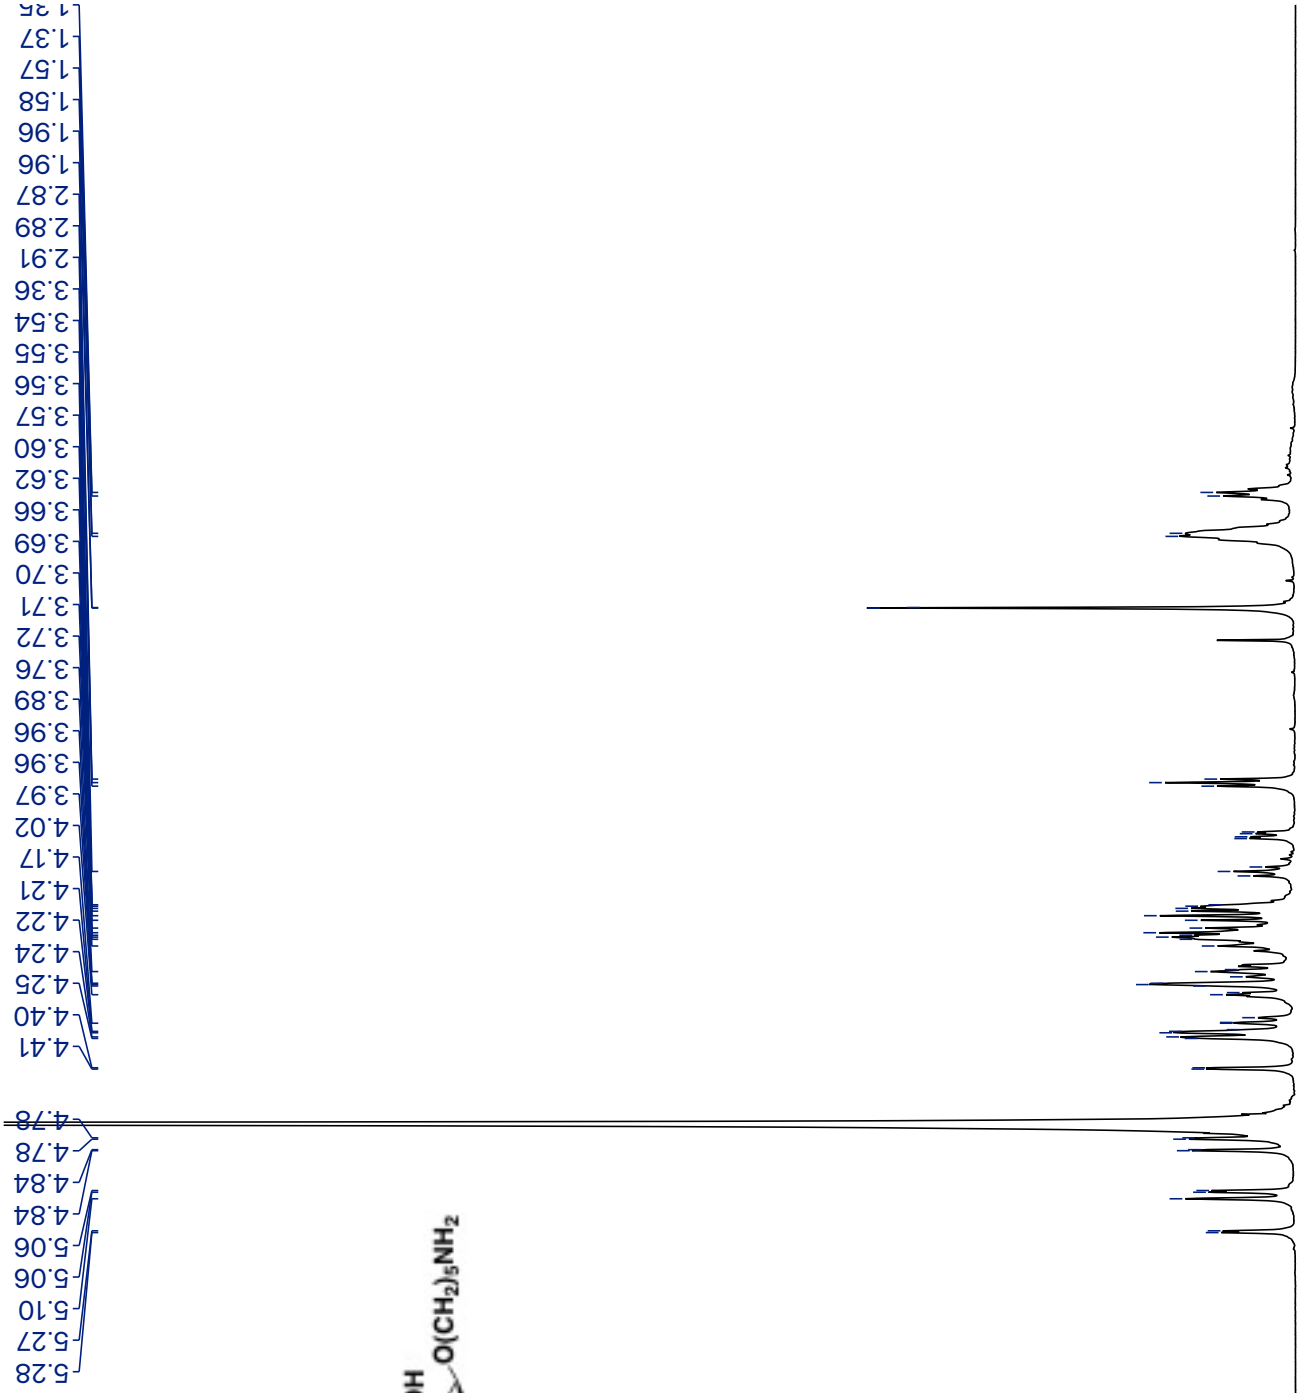

WL-2-185-D-NAc-C-2S-B-NS-C-TC.1.1r —

175.54  
175.13  
174.80

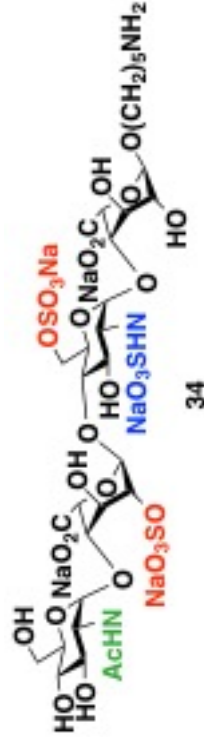

100.70  
98.96  
95.43  
93.50  
76.13  
74.77  
73.79  
71.88  
71.27  
70.70  
69.76  
69.05  
68.53  
68.33  
68.04  
67.86  
66.37  
63.94  
60.25  
57.80  
53.35  
39.38  
27.99  
26.30  
22.25  
22.20

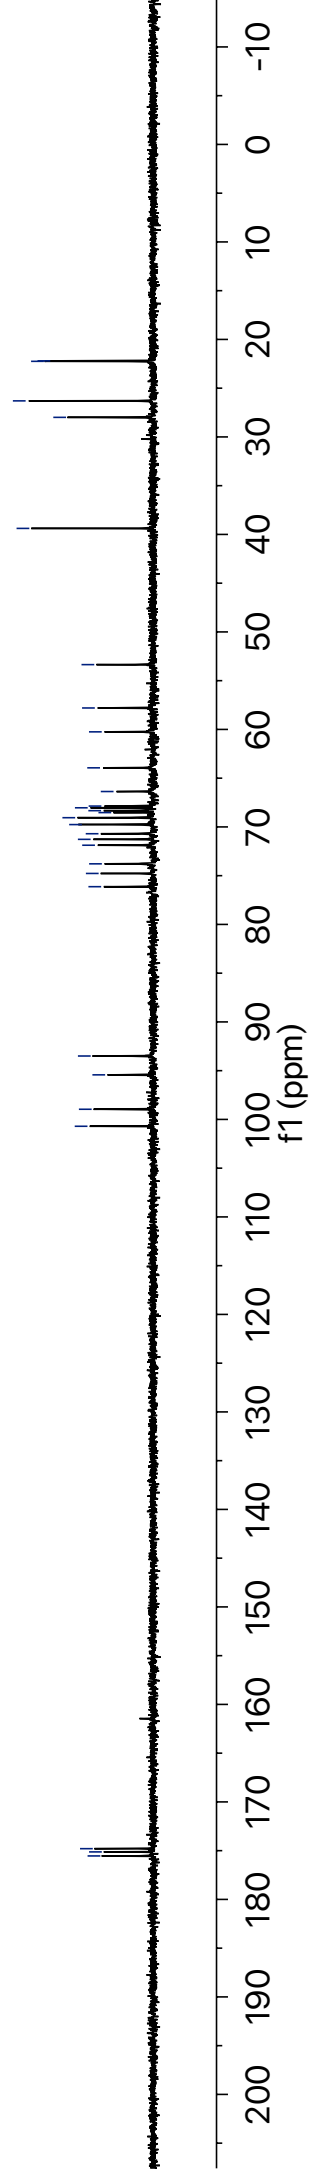

WL-2-228-D-NS-C-2S-B-6S-Nac-proc-H-TC.8.1.1r —

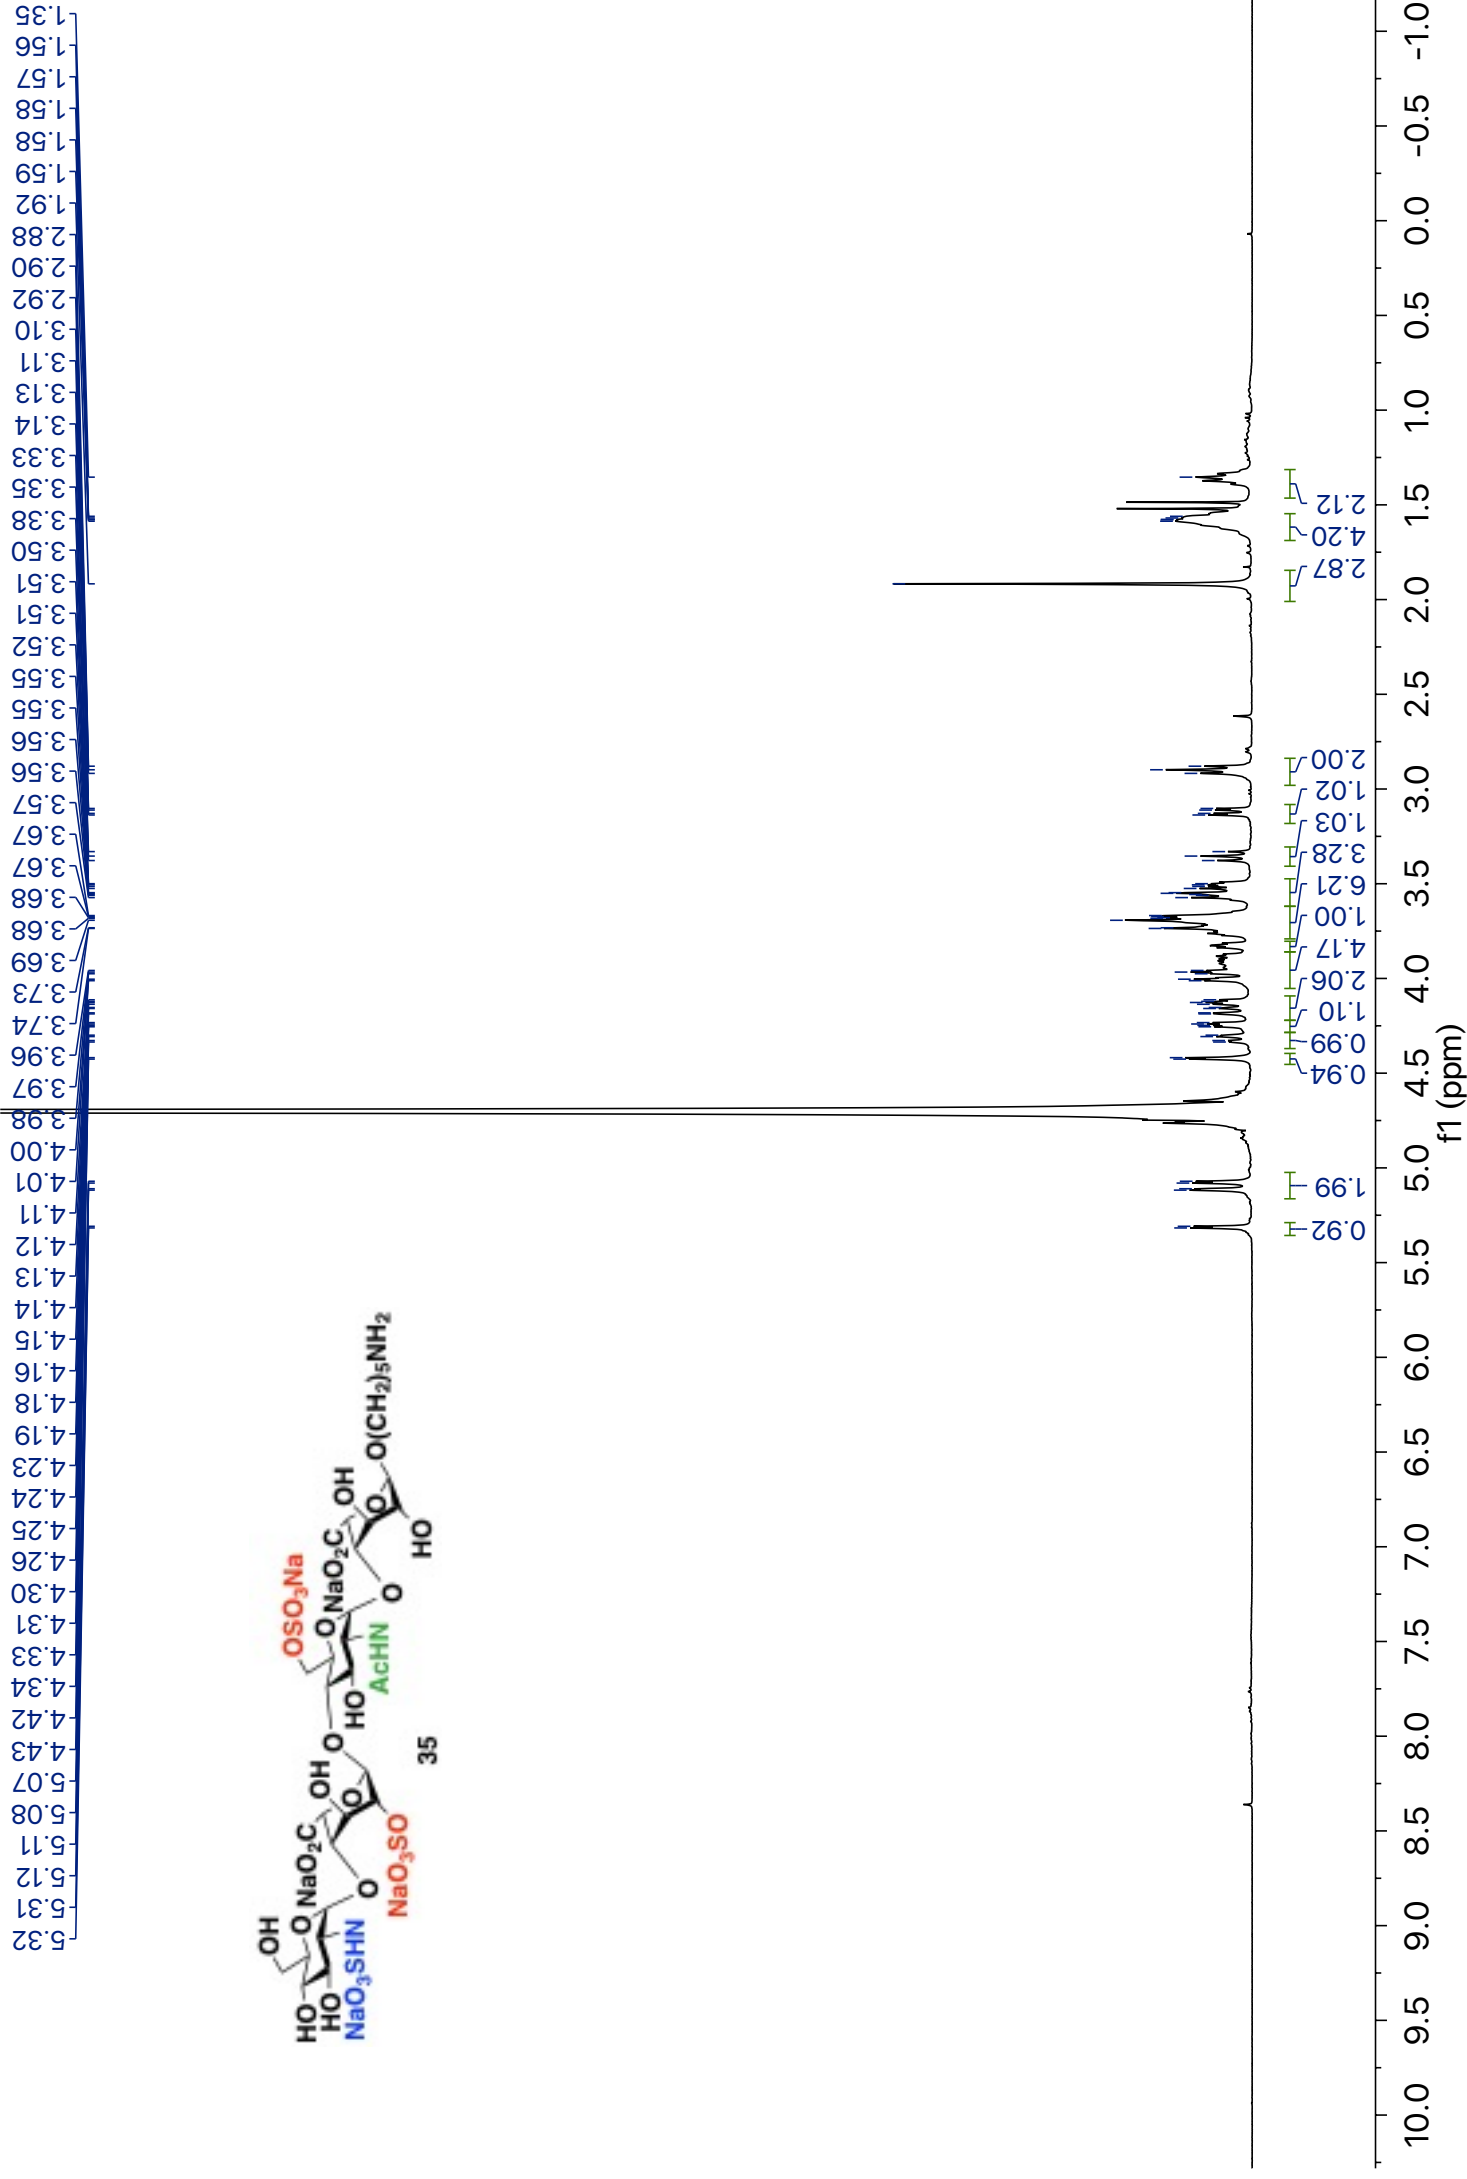



WL-2-228-D-NS-C-2S-B-6S-NAc-proc-C-TC.2.1.1r —

174.85  
174.29

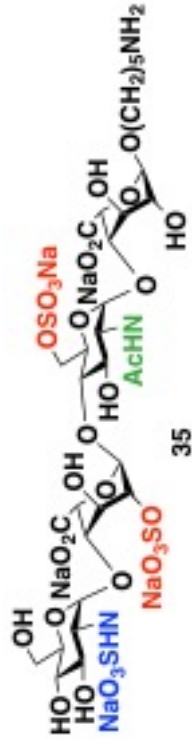

100.80  
99.27  
96.70  
94.40  
75.84  
75.66  
74.06  
71.66  
71.06  
69.94  
69.69  
69.57  
69.36  
69.24  
69.04  
69.01  
68.83  
68.08  
66.36  
60.29  
58.05  
53.51  
39.38  
28.04  
26.21  
22.25  
21.91

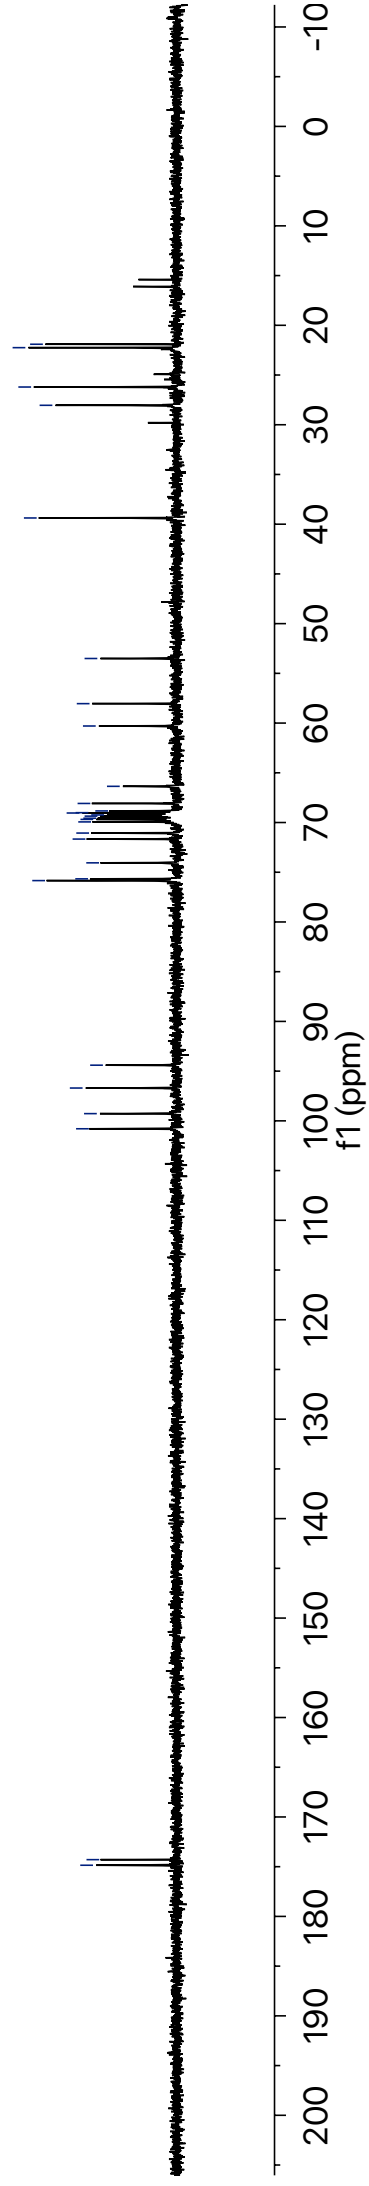

WL-2-220-D-NS-C-2S-B-NS6S-prod-H-TC.2.1.1r

5.31  
5.30  
5.27  
5.27  
5.12  
5.12  
4.78  
4.77  
4.41  
4.41  
4.33  
4.32  
4.30  
4.25  
4.24  
4.22  
4.16  
4.15  
4.14  
4.13  
4.13  
4.12  
4.11  
4.02  
4.01  
4.00  
3.97  
3.96  
3.90  
3.87  
3.76  
3.74  
3.73  
3.70  
3.69  
3.68  
3.67  
3.66  
3.66  
3.58  
3.57  
3.57  
3.55  
3.55  
3.54  
3.54  
3.53  
3.53  
3.37  
3.35  
3.33  
3.19  
3.18  
3.16  
3.15  
3.13  
3.12  
3.11  
3.10  
2.91  
2.90  
2.88  
1.59  
1.57  
1.37  
1.35

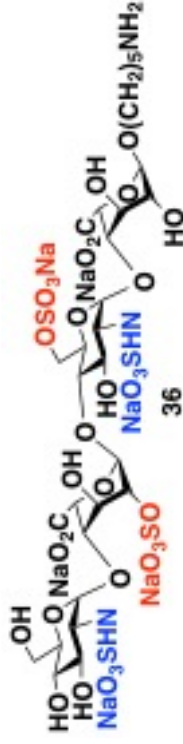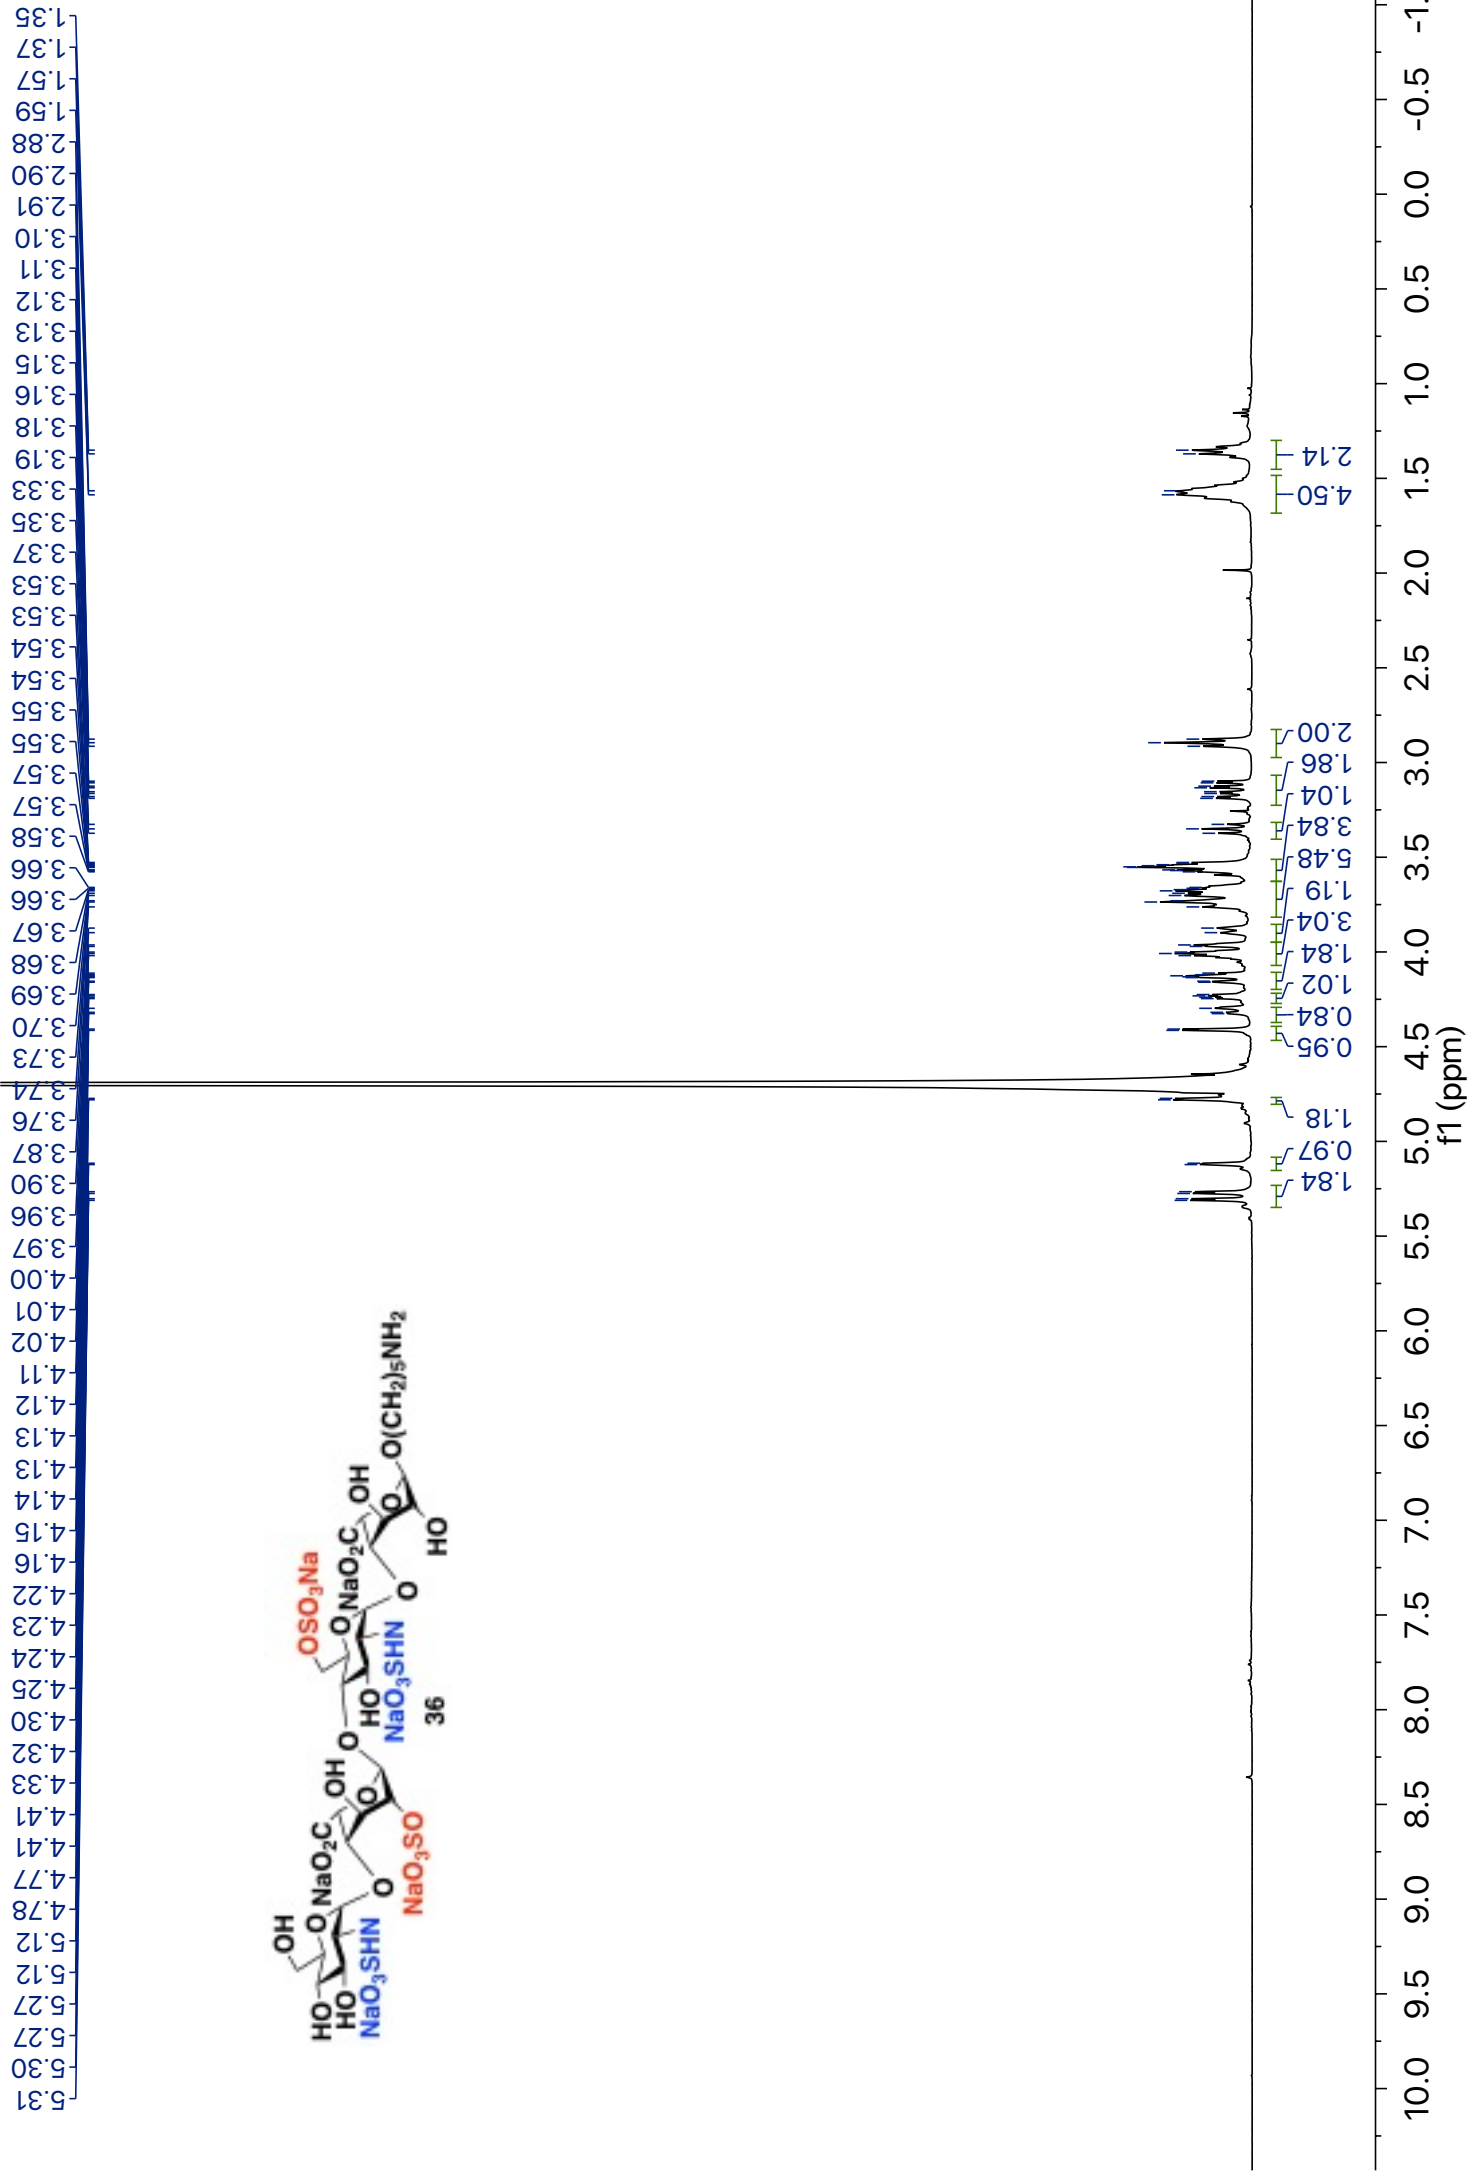

WL-2-220-D-NS-C-2S-B-NS6S-prod-C-TC.1.1.1r

175.03

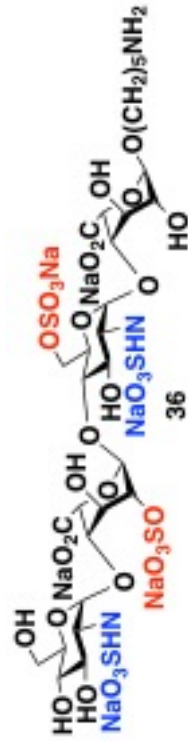

100.73  
99.16  
96.78  
95.51  
75.83  
75.79  
75.69  
74.88  
71.66  
71.05  
69.94  
69.69  
69.16  
69.12  
68.98  
68.59  
68.40  
68.04  
66.35  
60.29  
58.05  
57.74  
39.37  
27.99  
26.18  
22.23

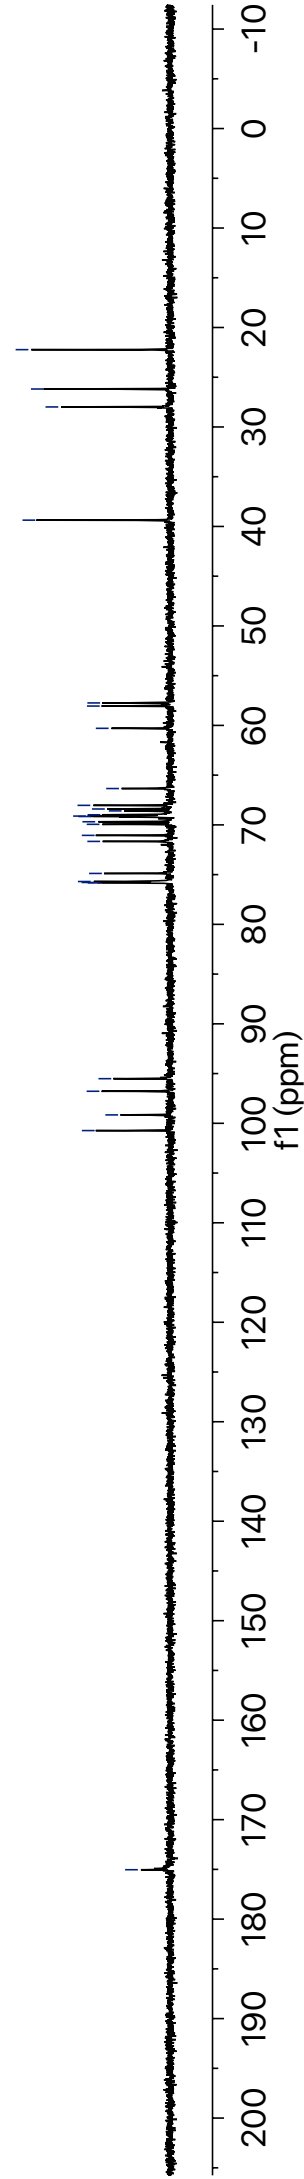

WL-2-113-D-6SO3-NAC-B-6SO3-NAC-prod-H.3.1.r —

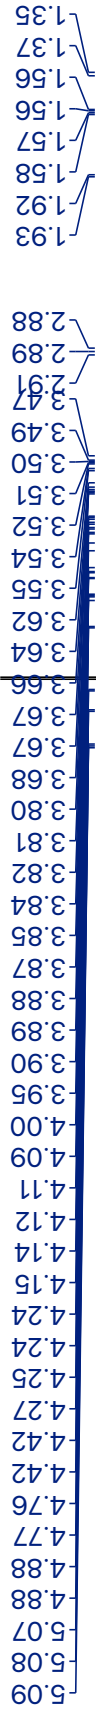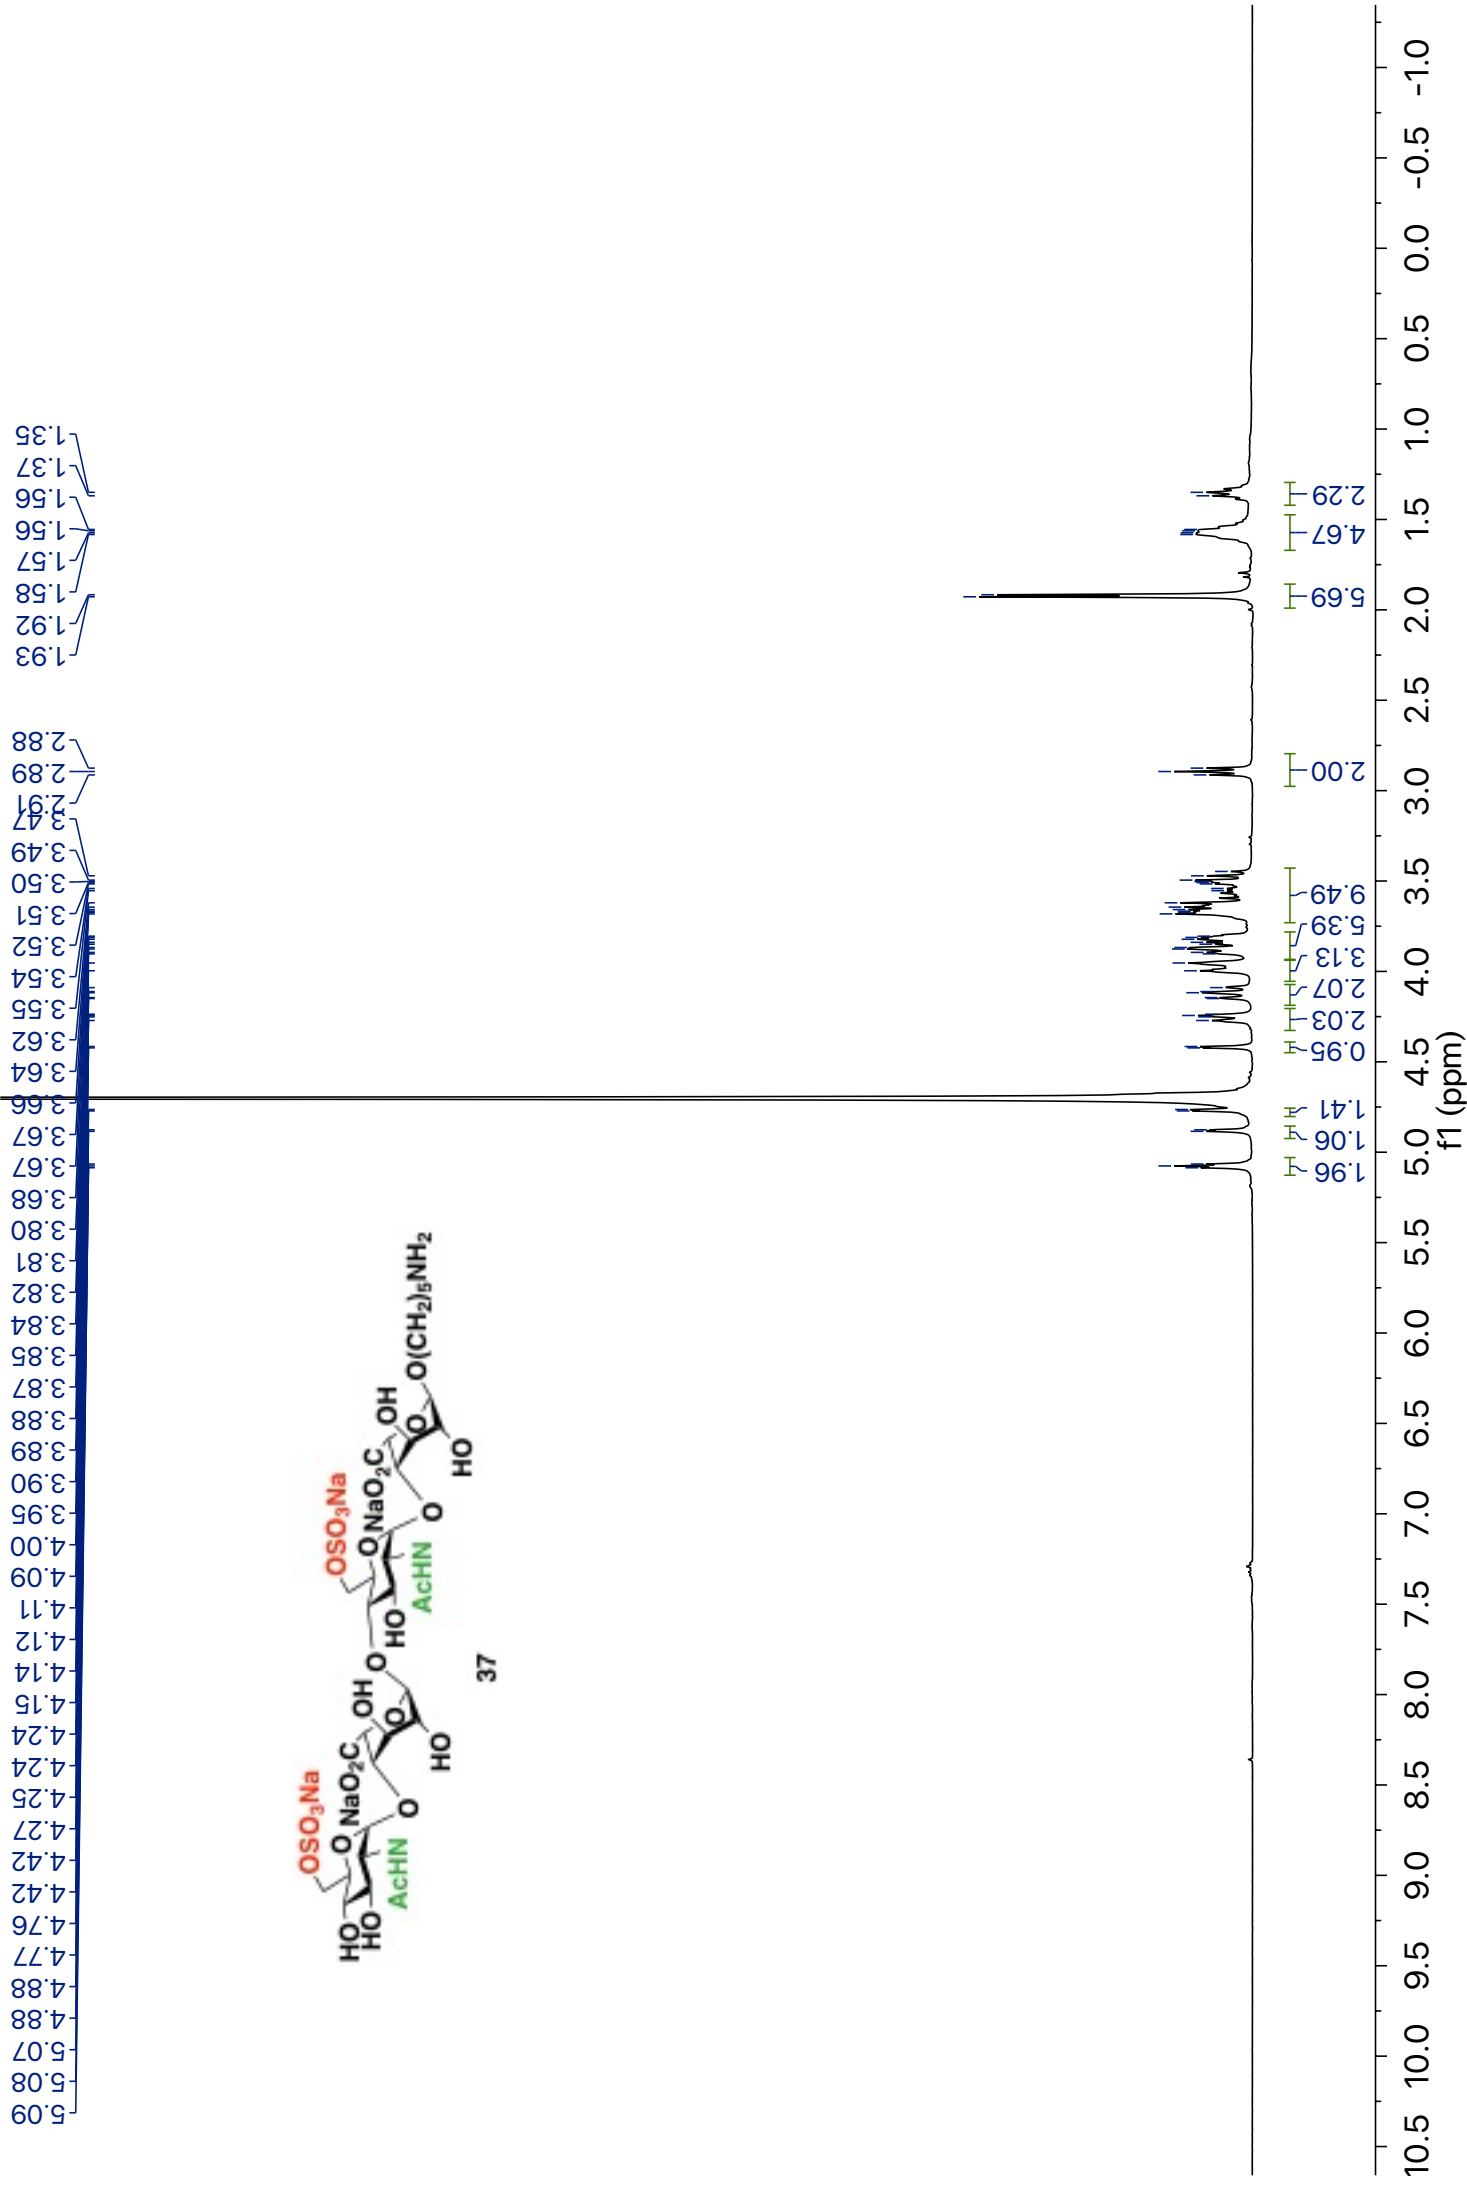

WL-2-113-D-6SO3-NAC-B-6SO3-NAC-final-C.1.1.1r

174.97  
174.41  
174.28

101.88  
100.77  
94.50  
94.30  
76.75  
74.02  
73.99  
71.01  
70.09  
69.79  
69.42  
69.36  
69.32  
69.19  
69.02  
68.88  
68.77  
68.59  
68.07  
66.38  
66.16  
53.54  
53.37  
39.35  
28.02  
26.21  
22.23  
21.91  
21.89

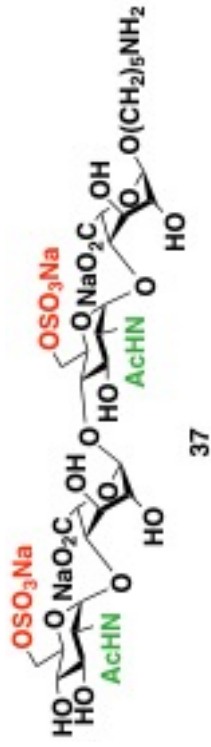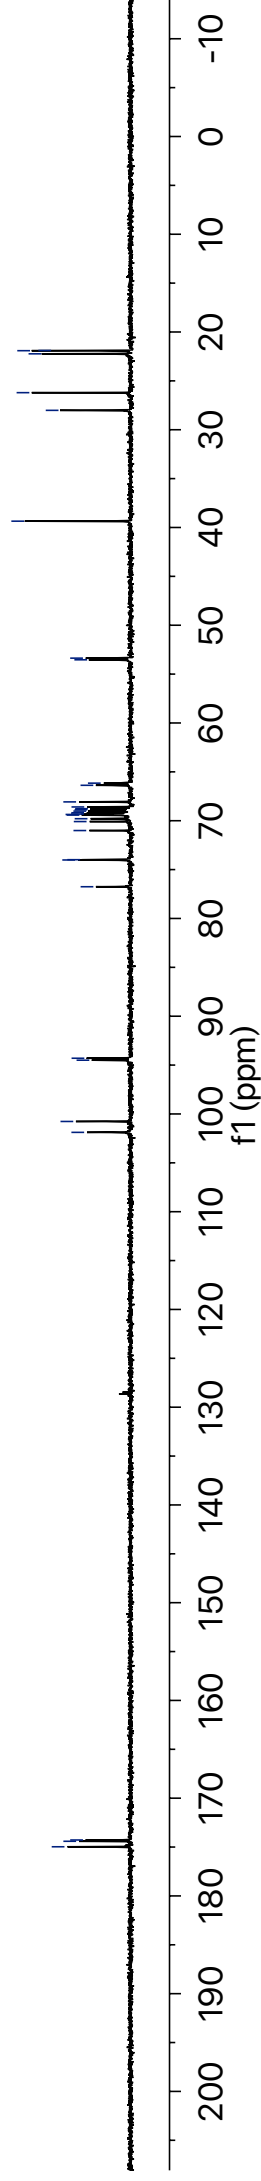

WL-2-112-D-6SO3-NAc-B-6SO3-NSO3-prod-HMBC.4.1.1r —

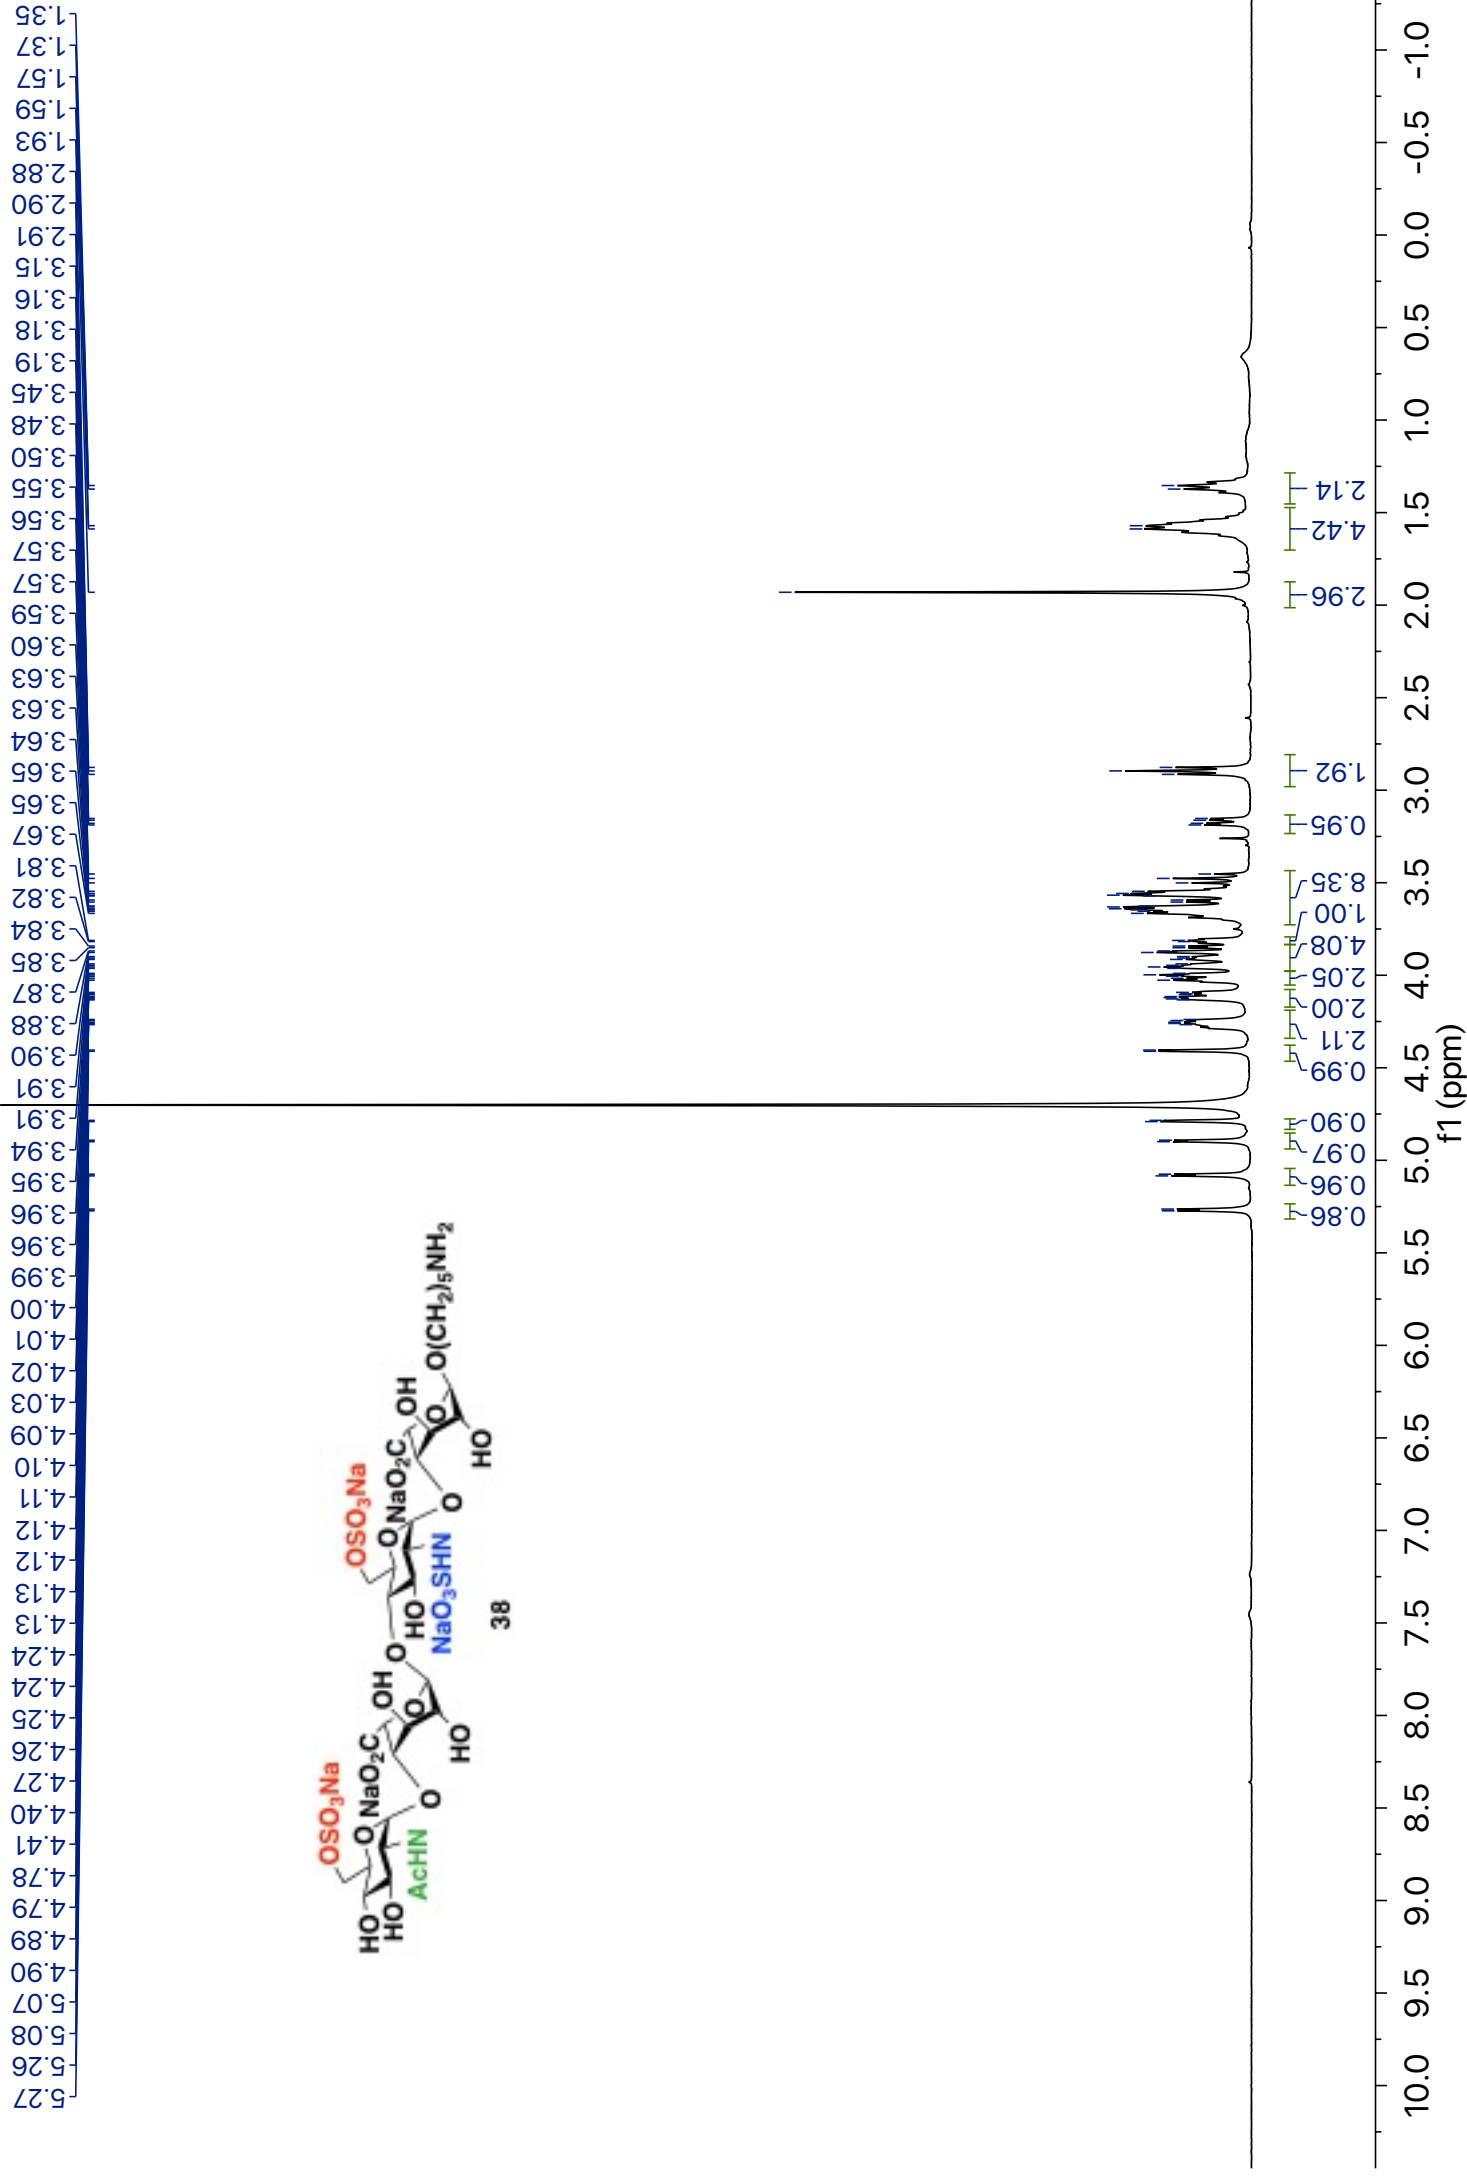

WL-2-112-D-6SO3-NAc-B-6SO3-NSO3-prod-C.1.1.1r

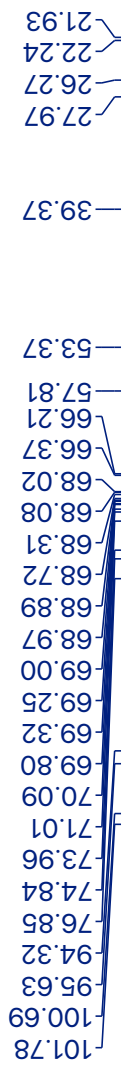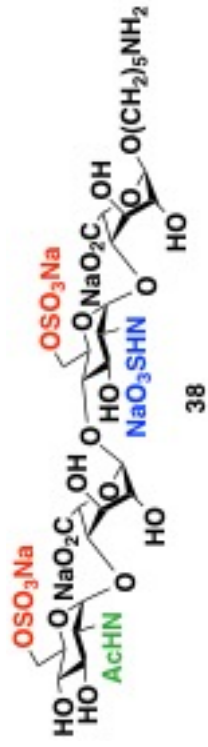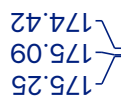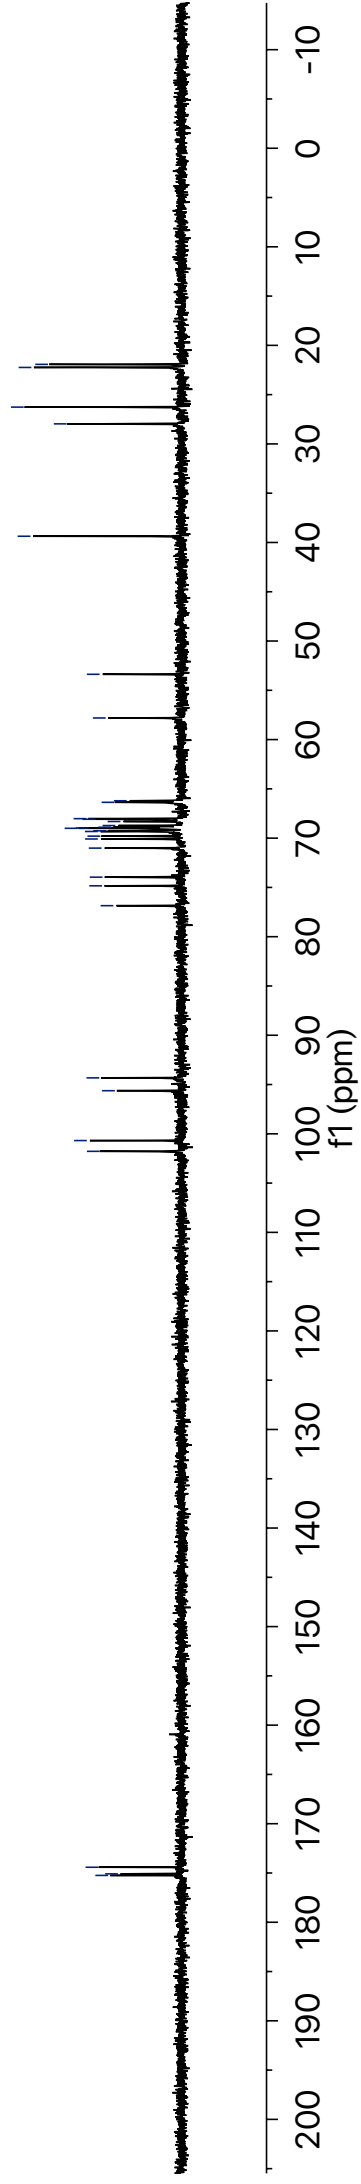

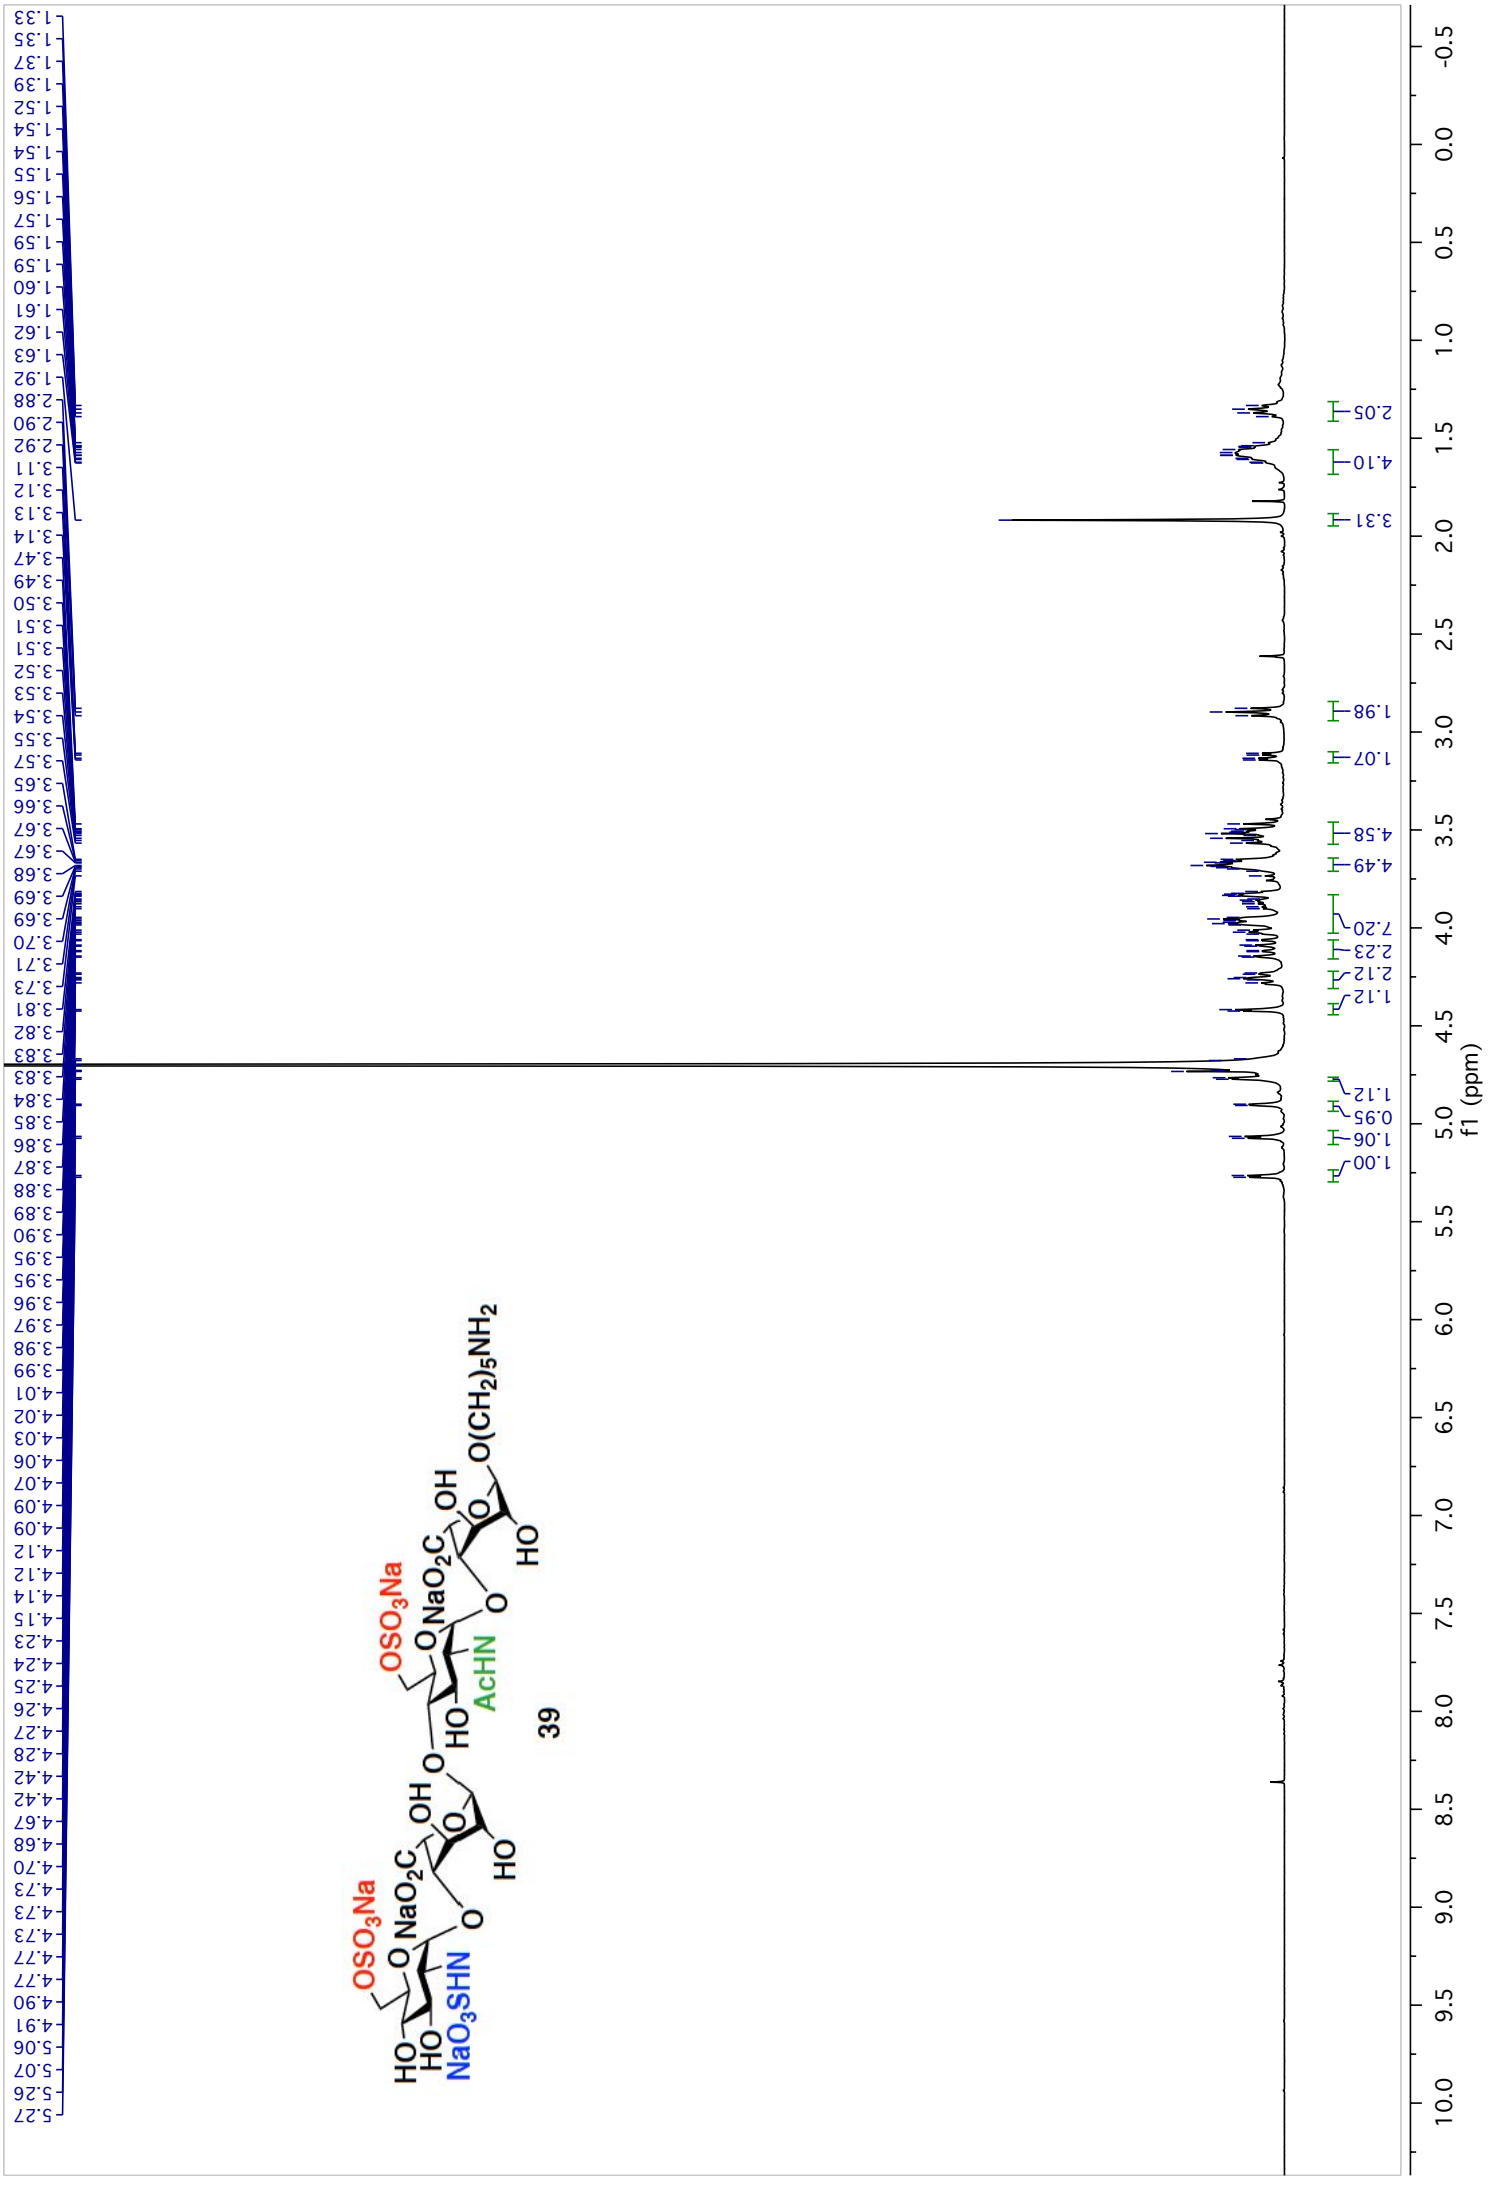







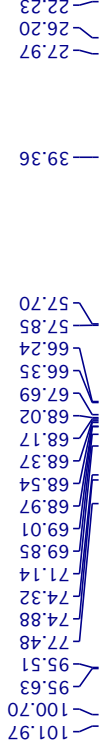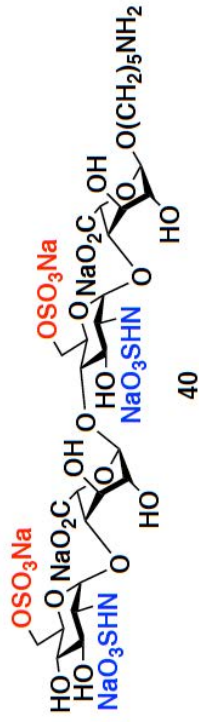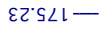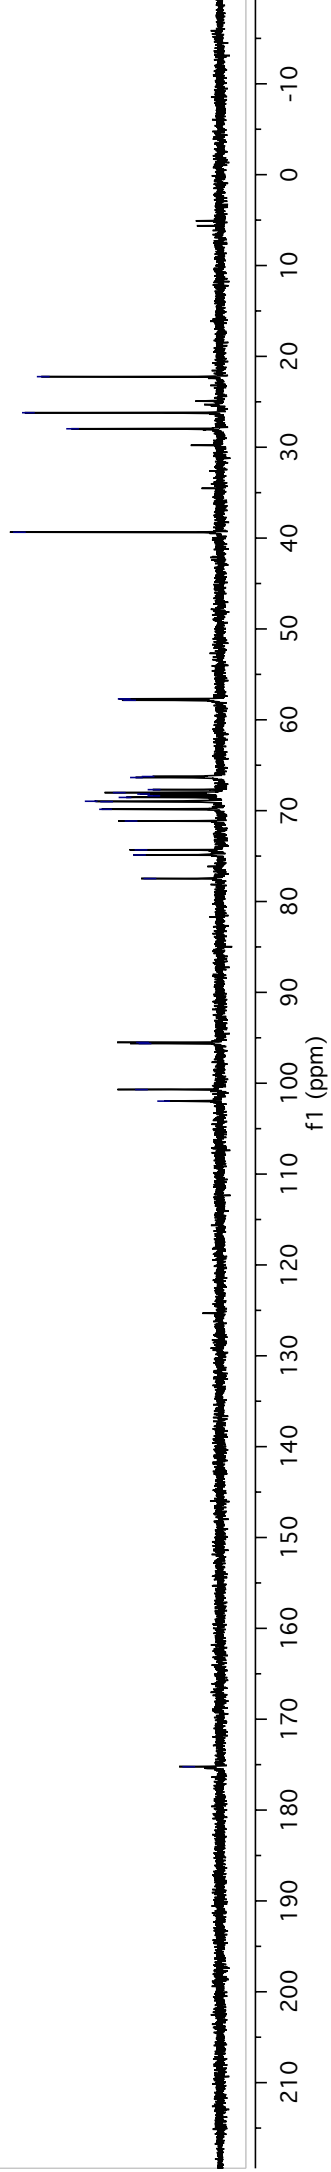

WL-2-181-D-Nac-6S-C-2S-B-Nac-H-TC.2.1.1r

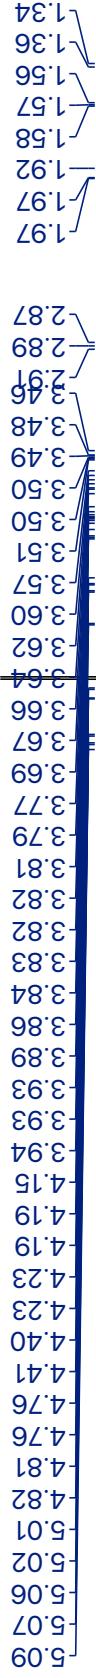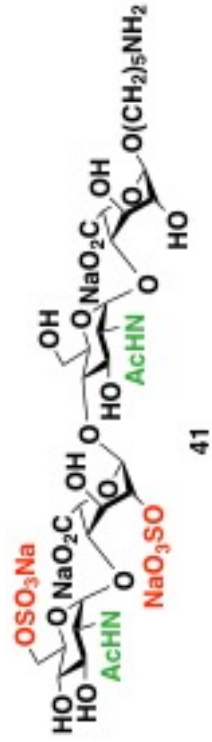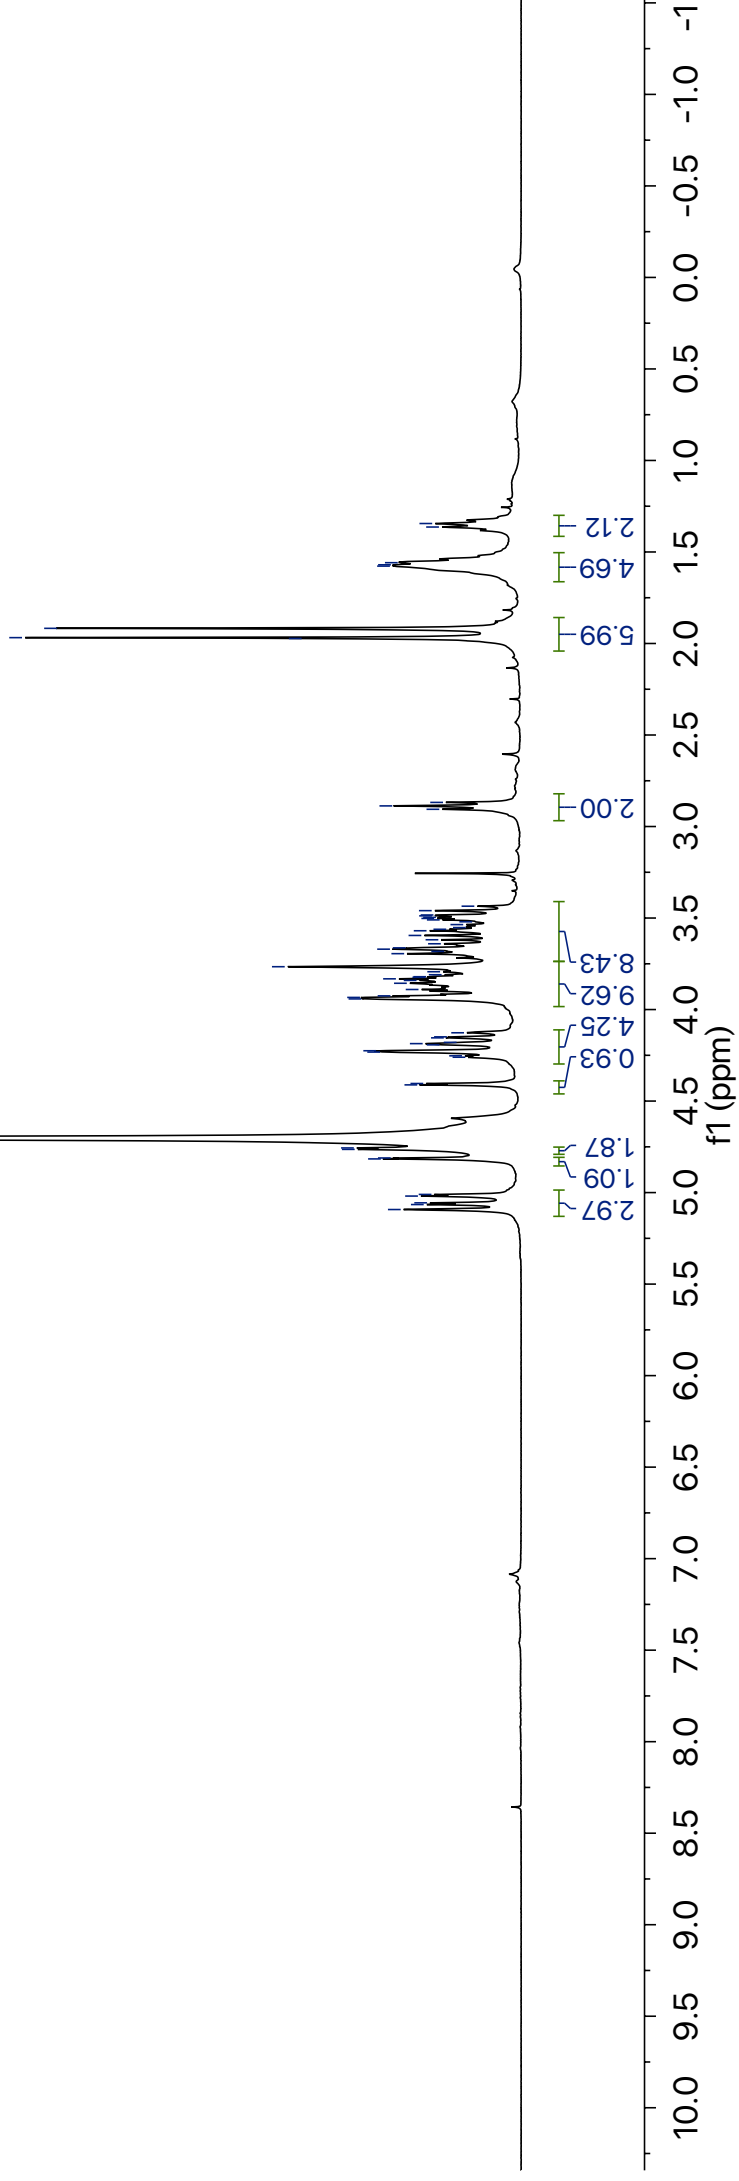

WL-2-181-D-NAC-6S-C-2S-B-NAC-C-TC.1.1r —

175.66  
174.94  
174.76  
174.31

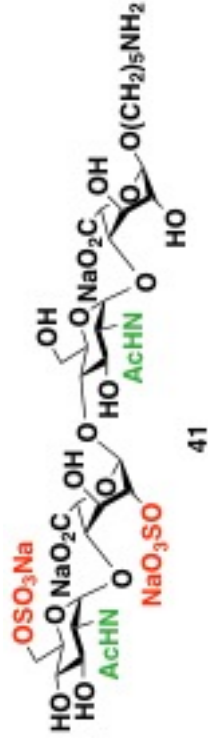

41

100.78  
99.17  
94.50  
93.58  
77.05  
73.99  
73.34  
71.26  
71.20  
70.46  
70.02  
69.60  
69.50  
69.15  
68.97  
68.78  
68.12  
67.31  
66.47  
63.32  
59.60  
53.88  
53.20  
39.37

28.02  
26.29  
22.22  
21.89

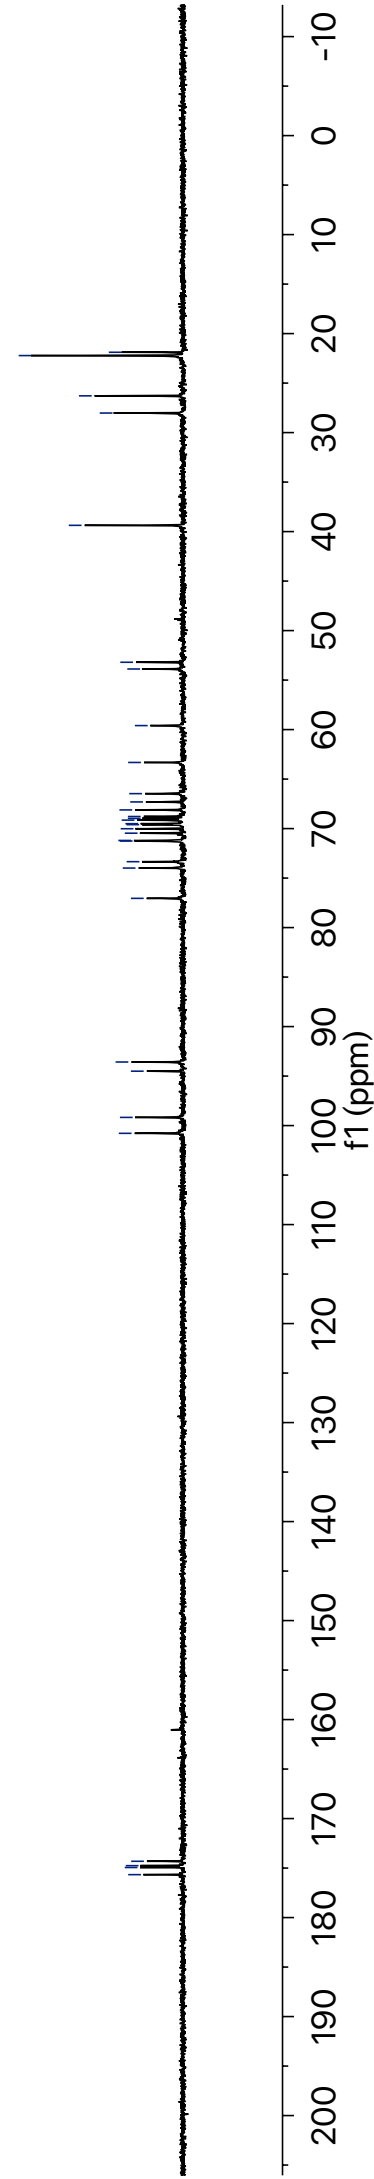

WL-2-073-D-6OSO3-NAC-C-2OSO3-B-NSO3-H.2.1.1r —

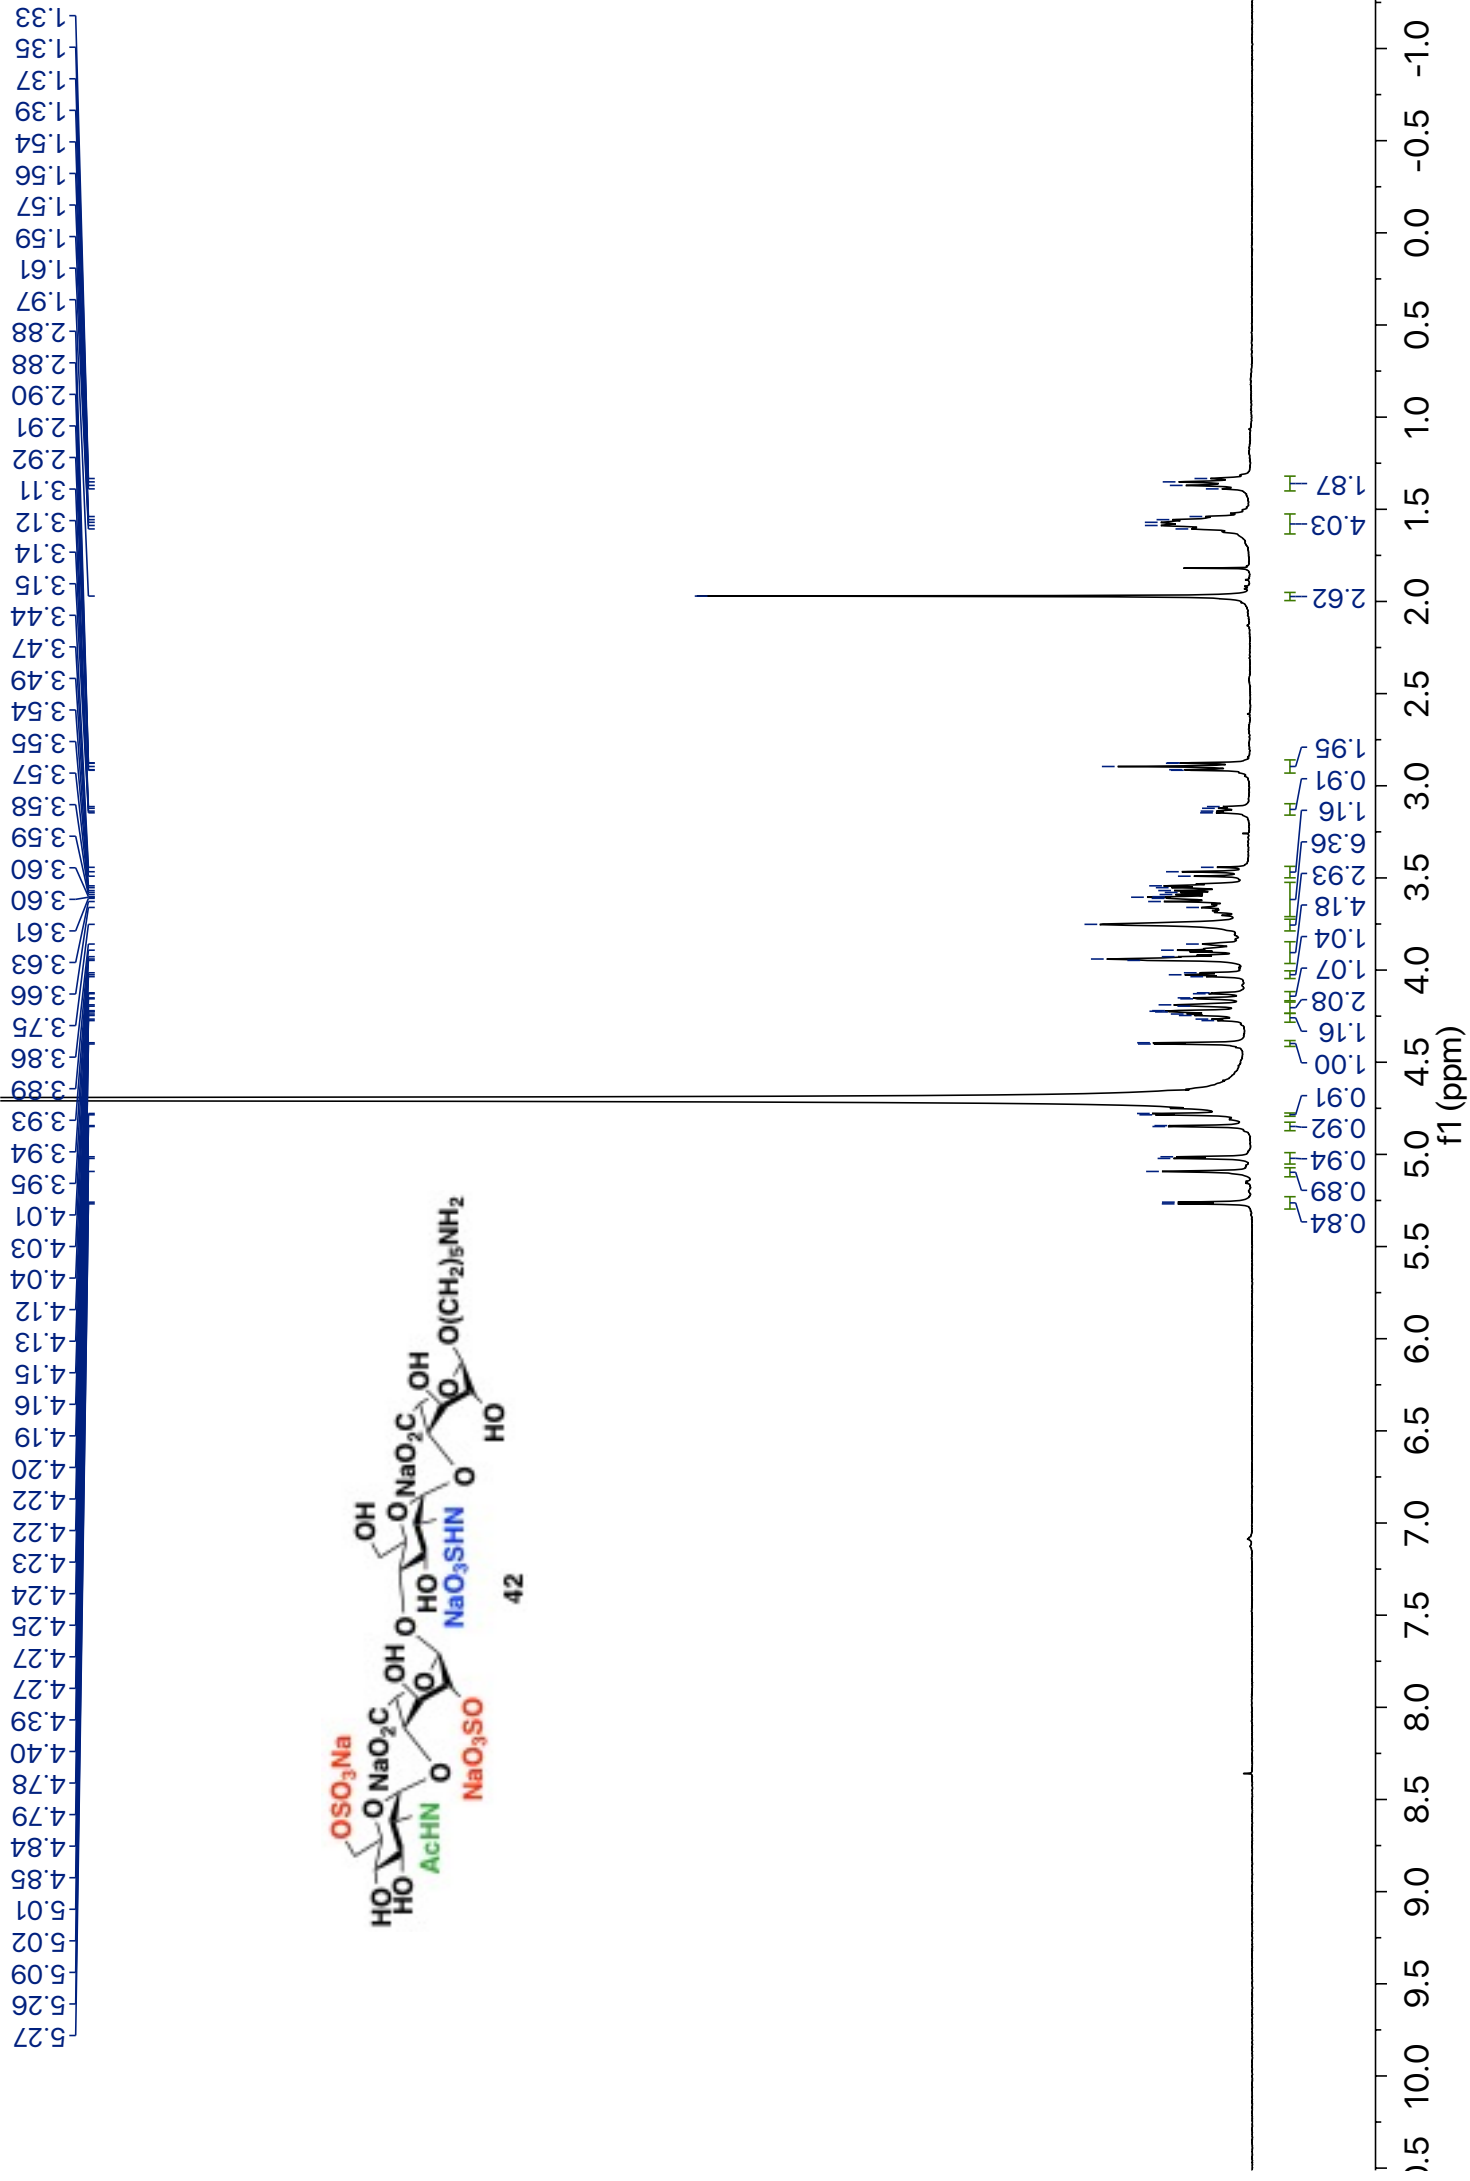



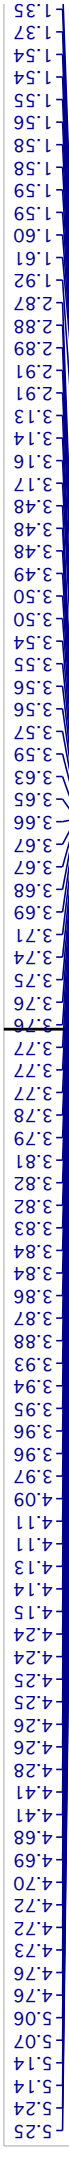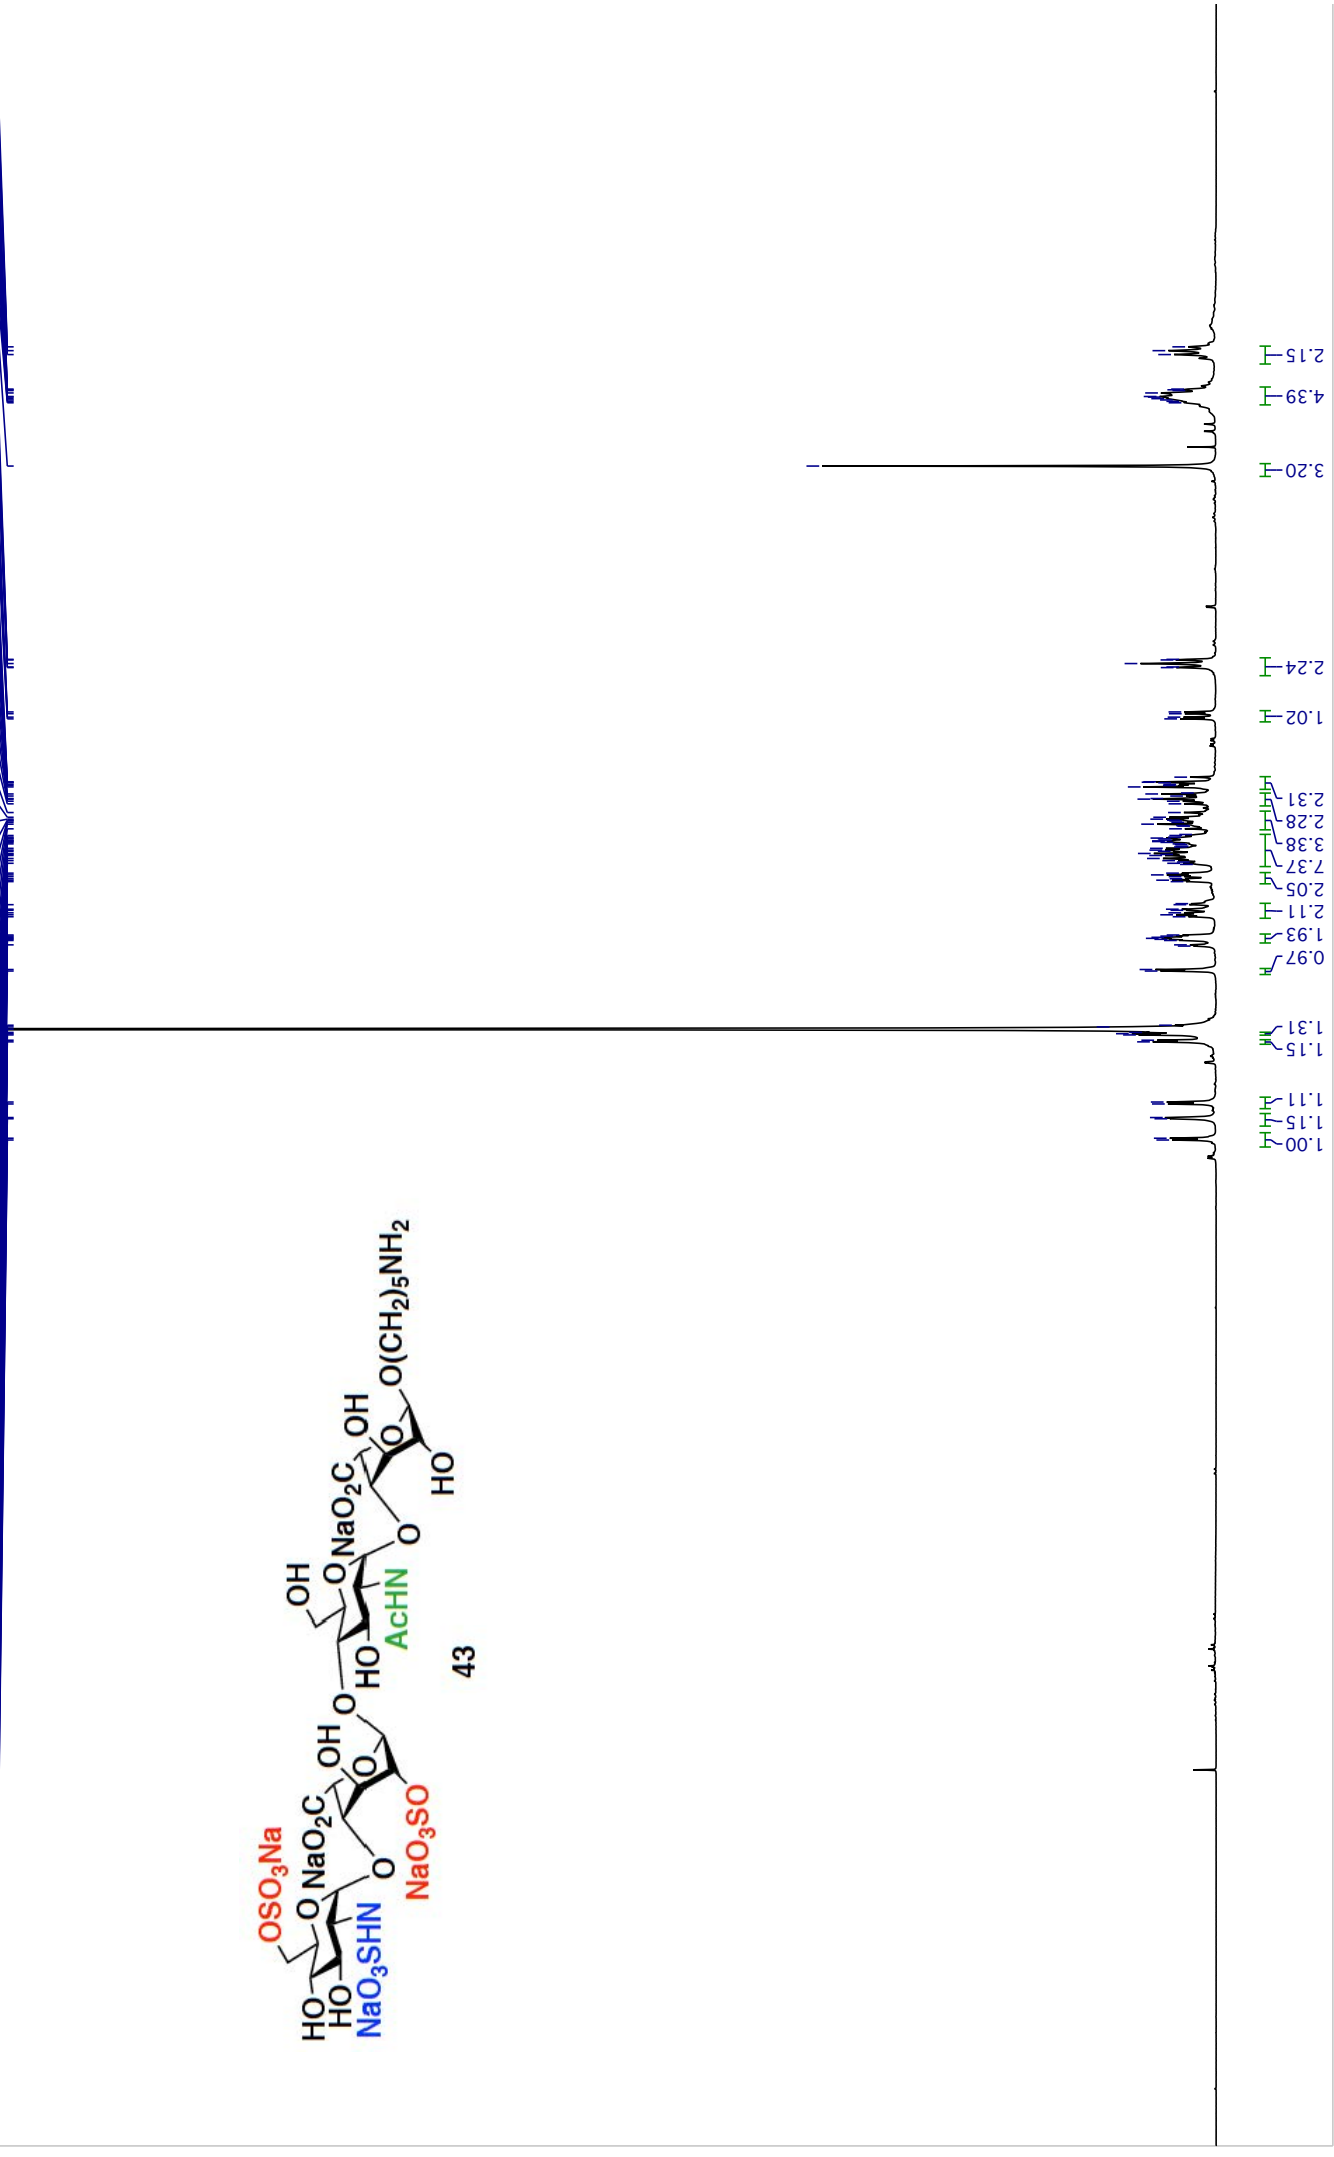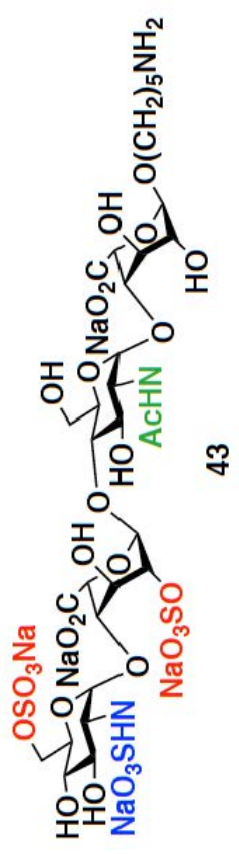





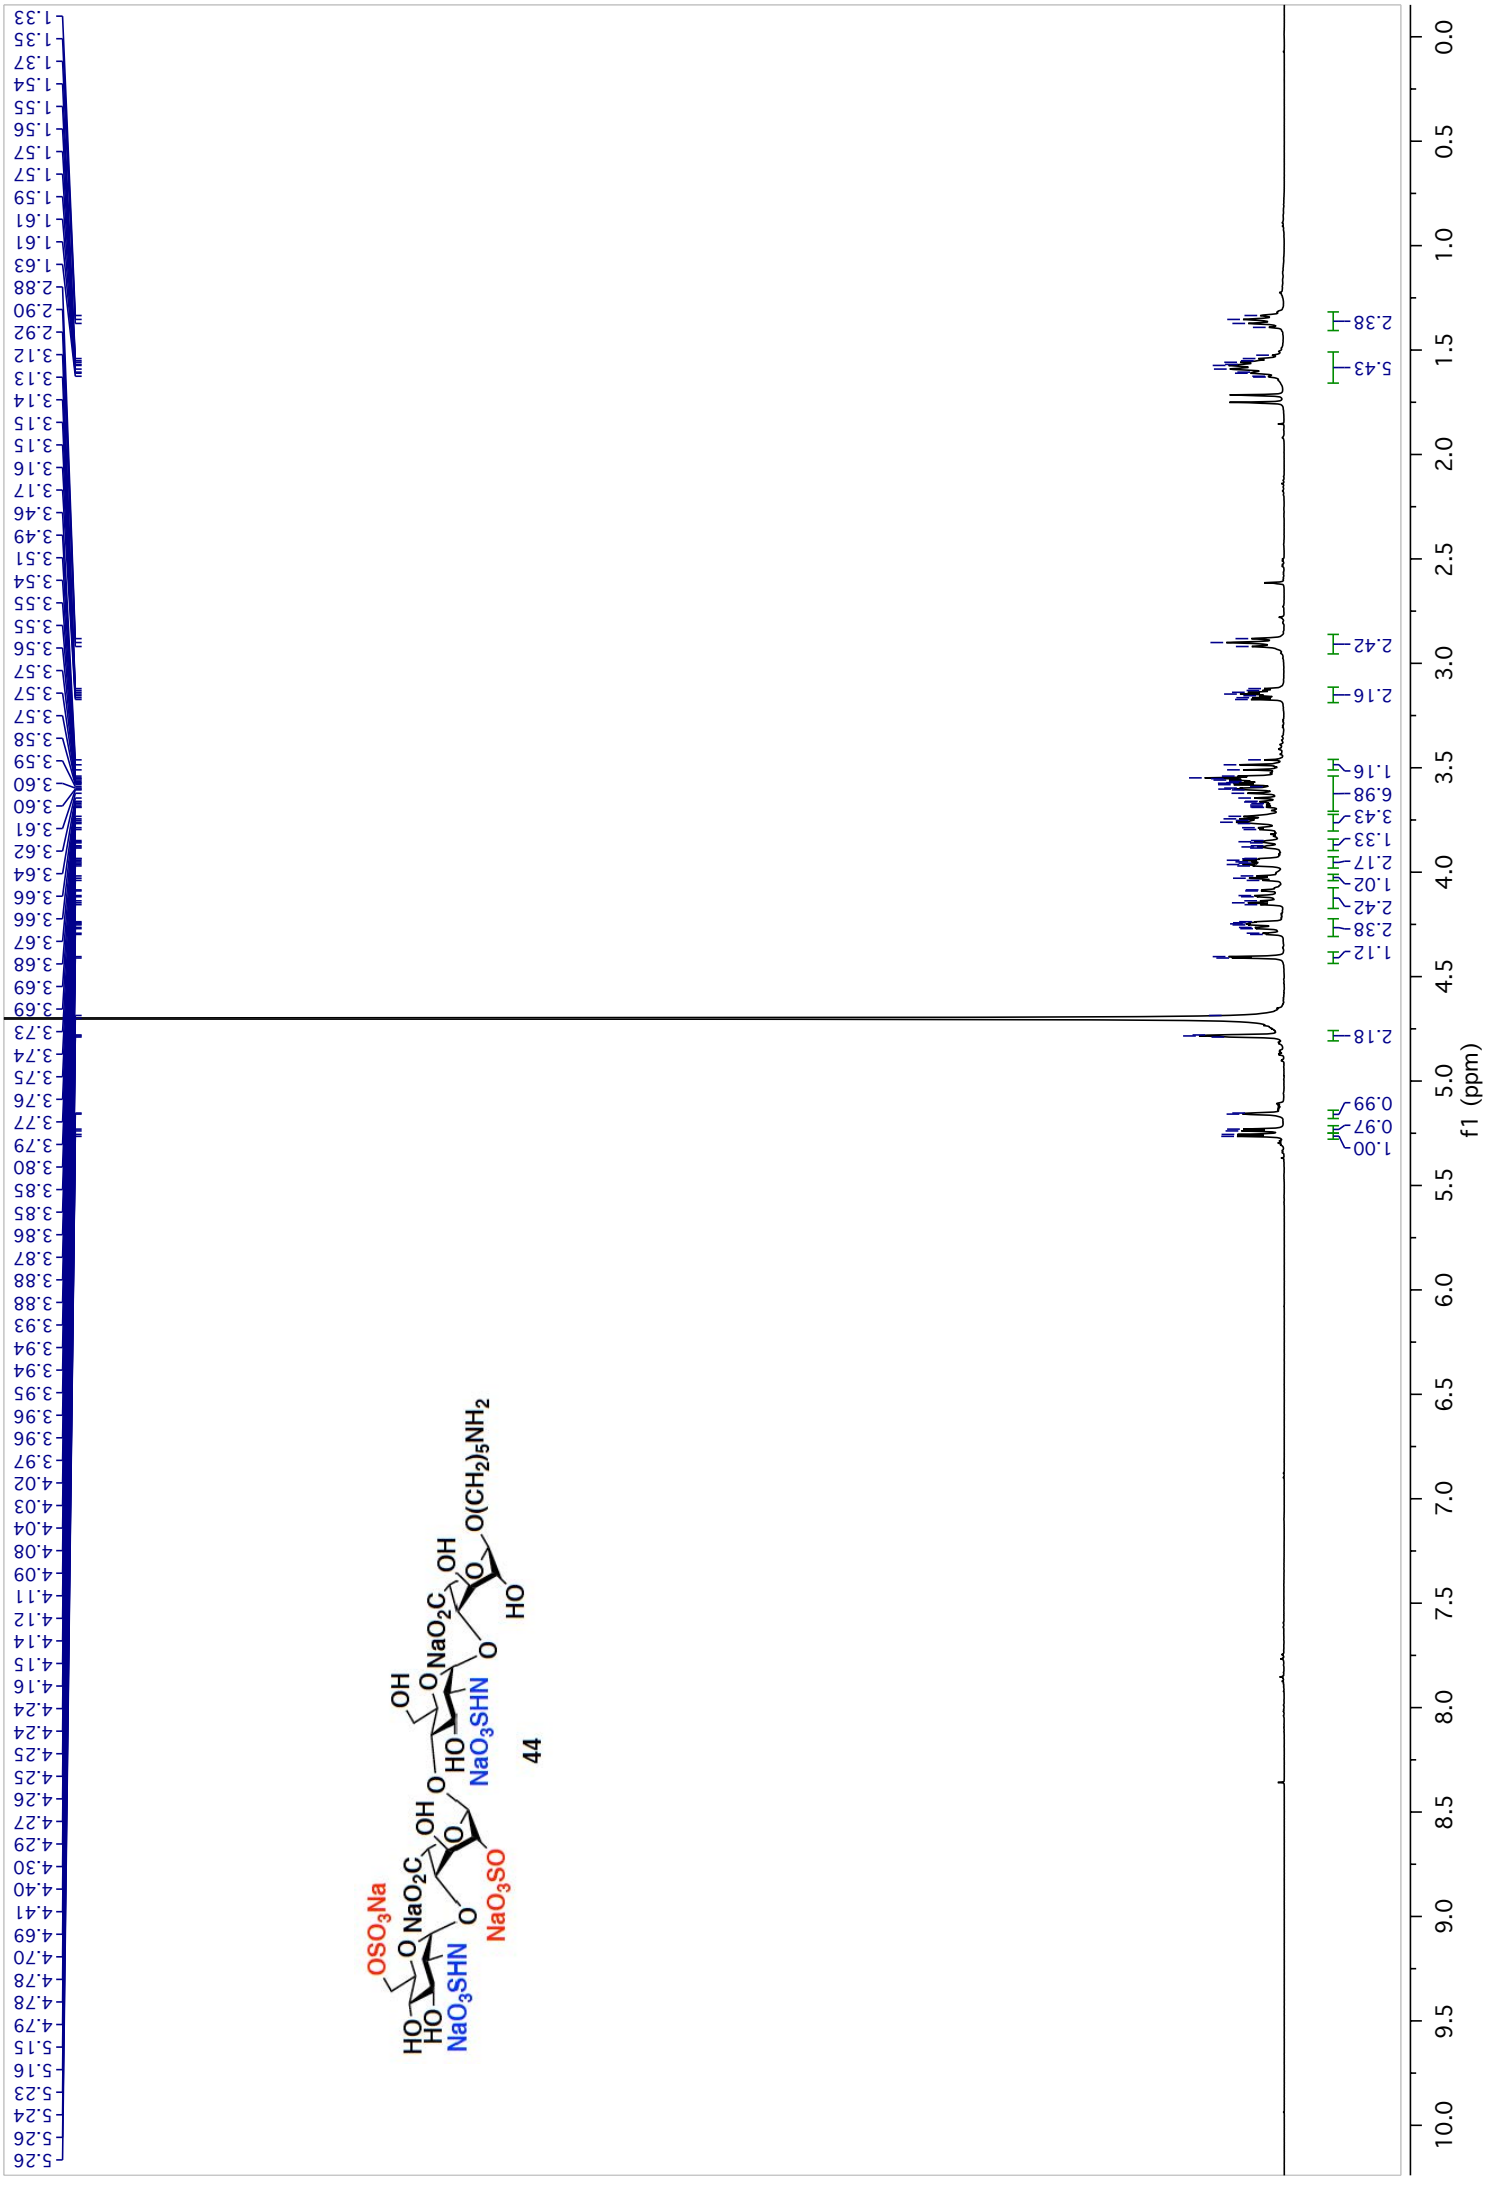

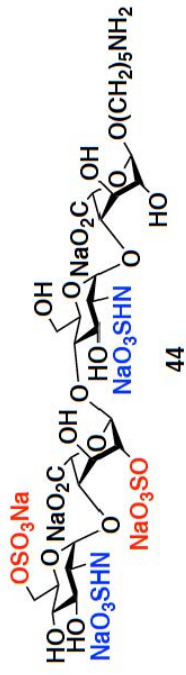

100.73  
99.04  
97.29  
95.67  
77.04  
75.59  
74.93  
74.64  
71.02  
70.89  
69.92  
69.64  
69.09  
68.52  
68.32  
68.15  
68.06  
67.68  
66.33  
59.65  
58.03  
57.96  
39.36  
27.97  
26.20  
22.21

175.17

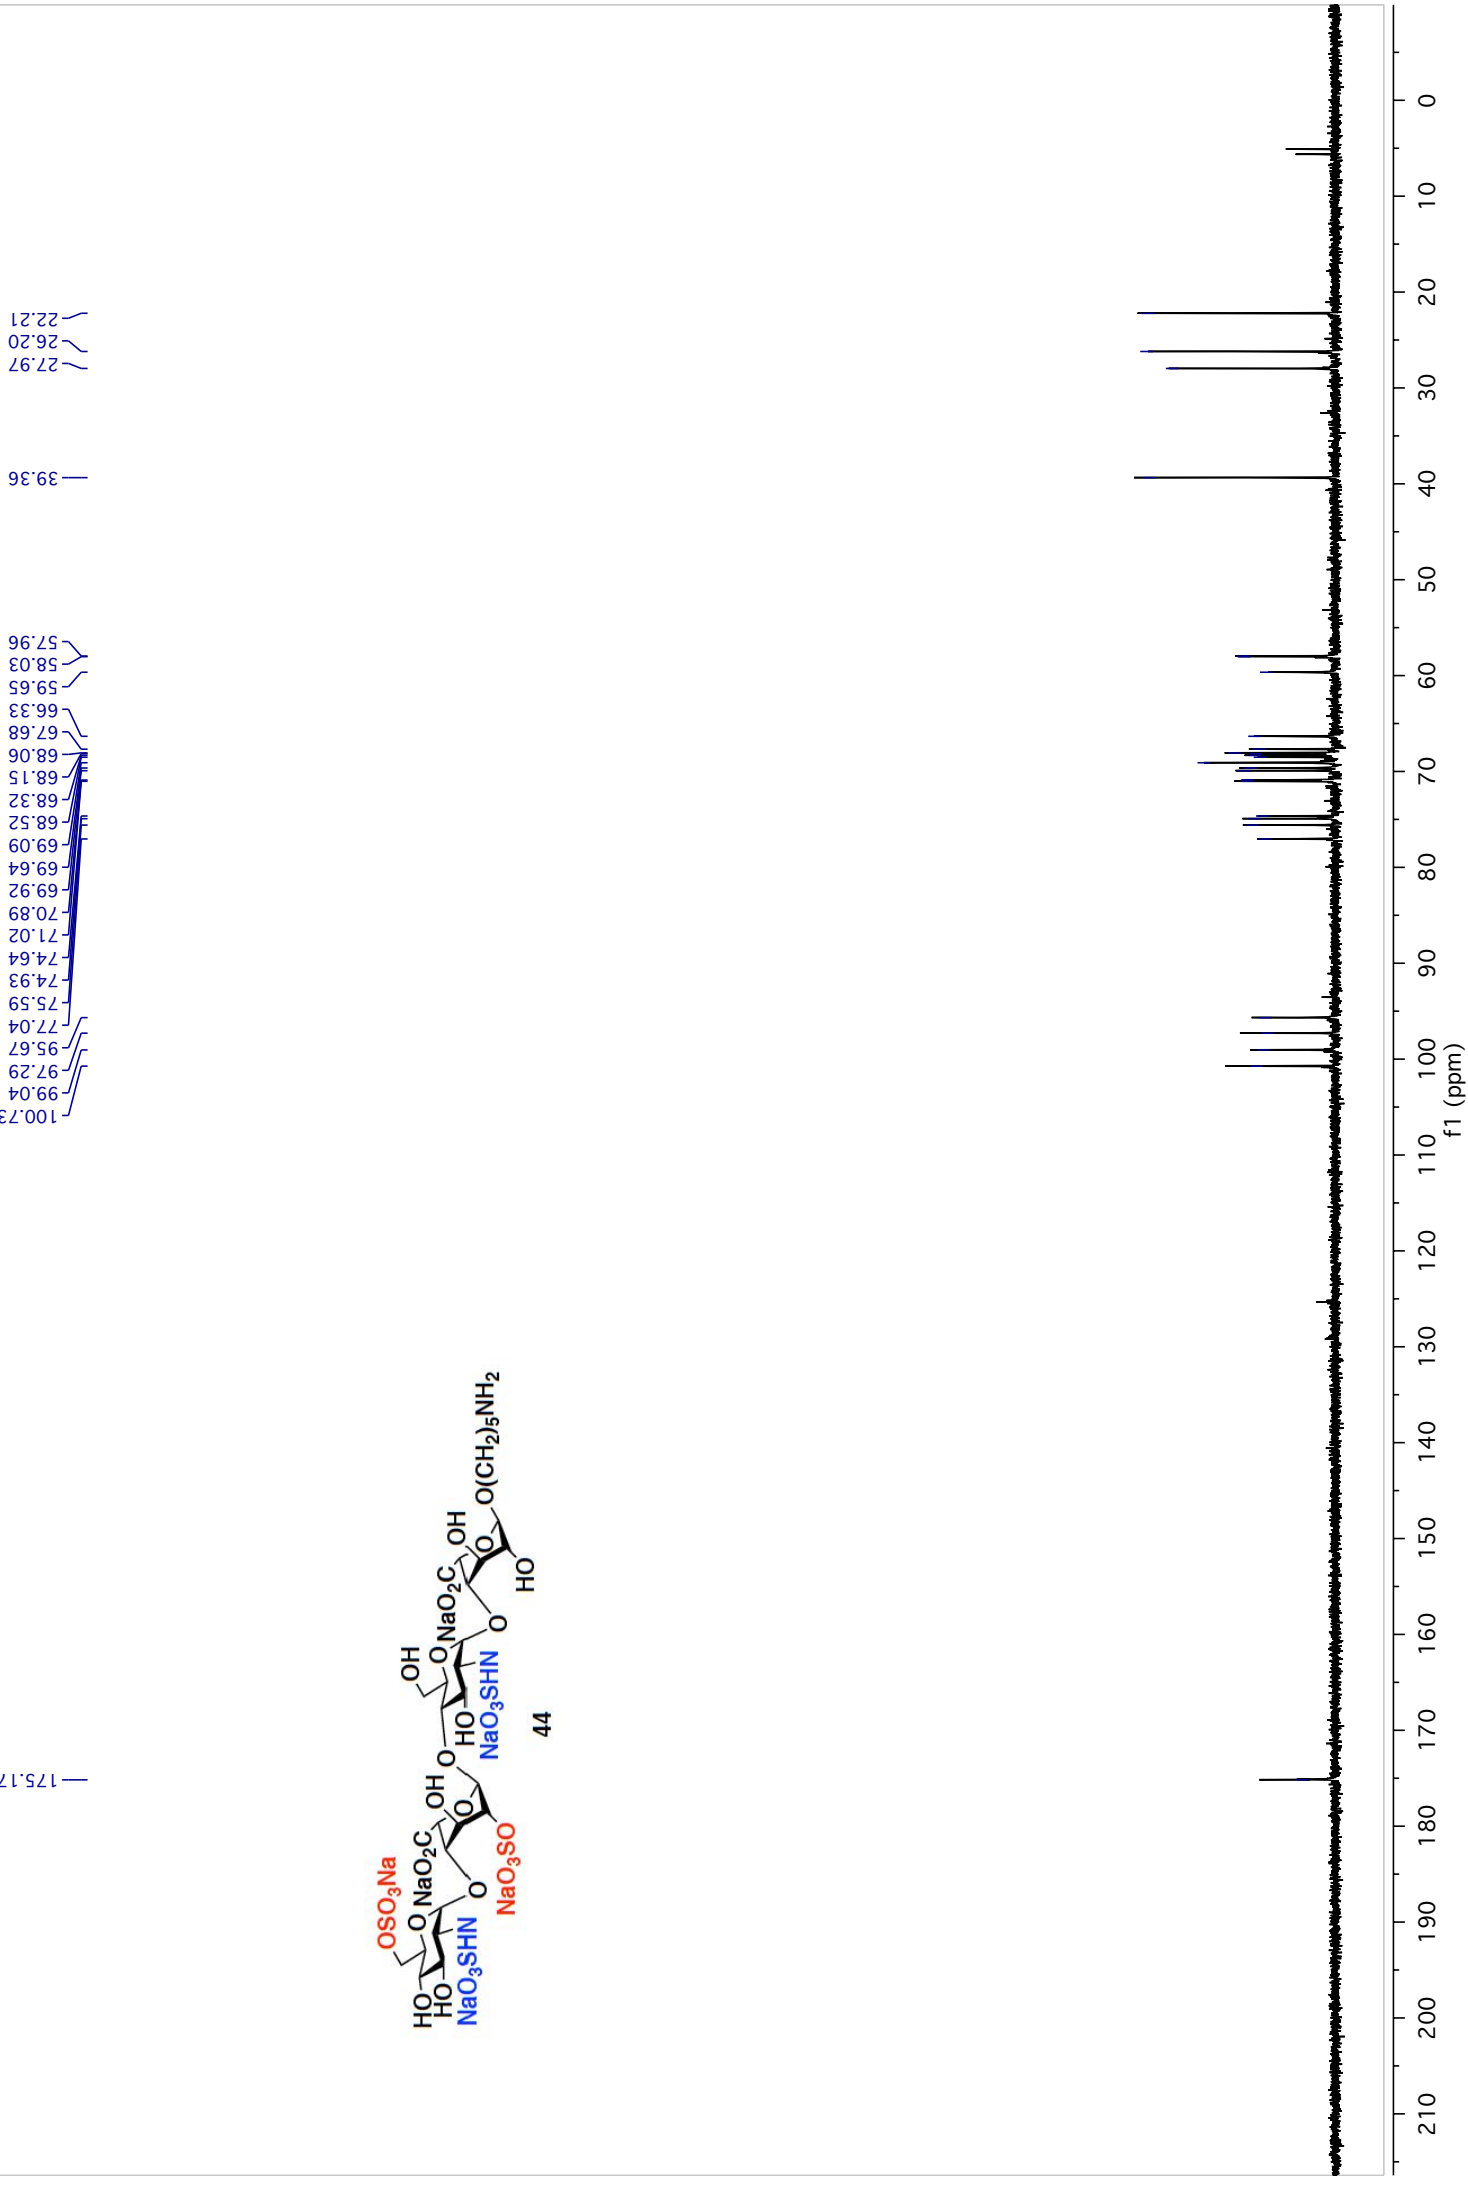

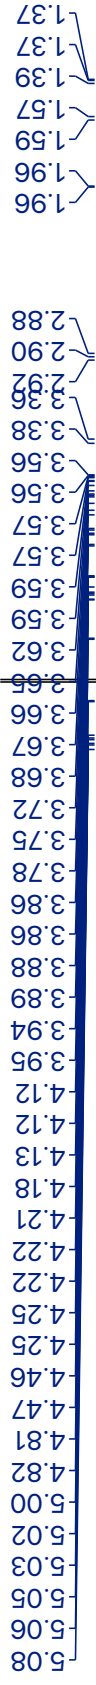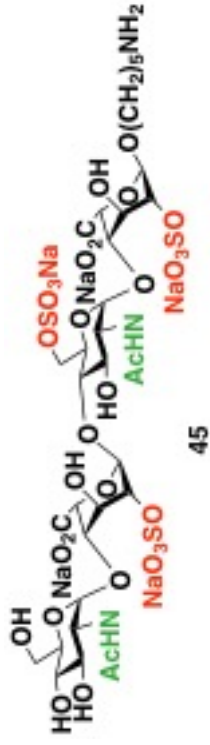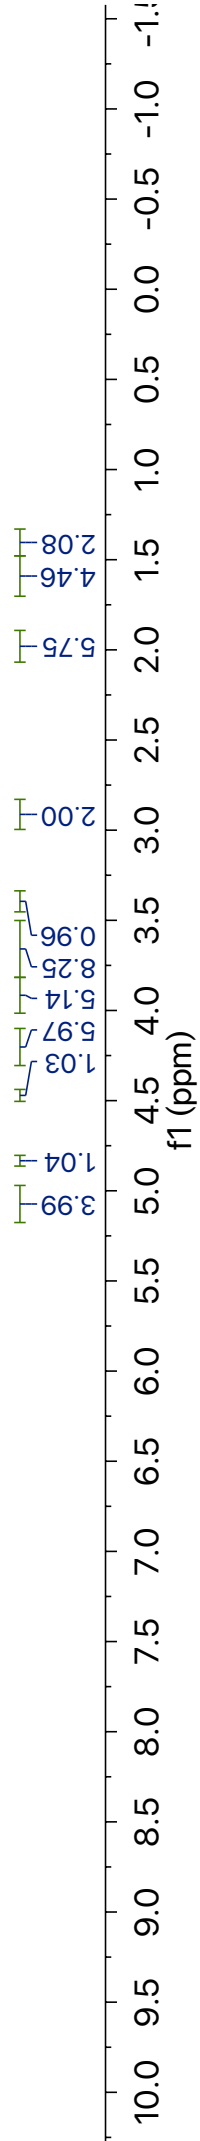

WL-2-198-D-NAC-C-2S-B-NAC-6S-A-2S-C-TC.1.1r

175.55  
175.19  
174.80  
174.71

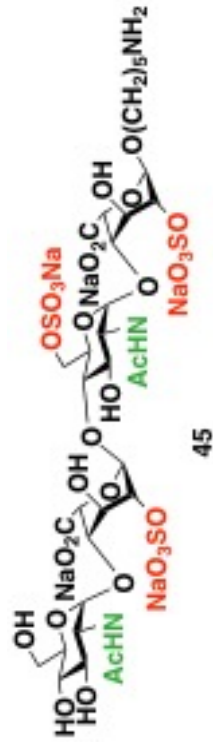

27.80  
26.26  
22.29  
22.19

99.16  
98.53  
93.46  
93.31  
76.44  
73.91  
73.62  
71.87  
71.29  
70.70  
70.55  
70.04  
69.74  
69.24  
68.08  
67.76  
66.99  
66.47  
63.75  
63.72  
60.24  
53.40  
53.35

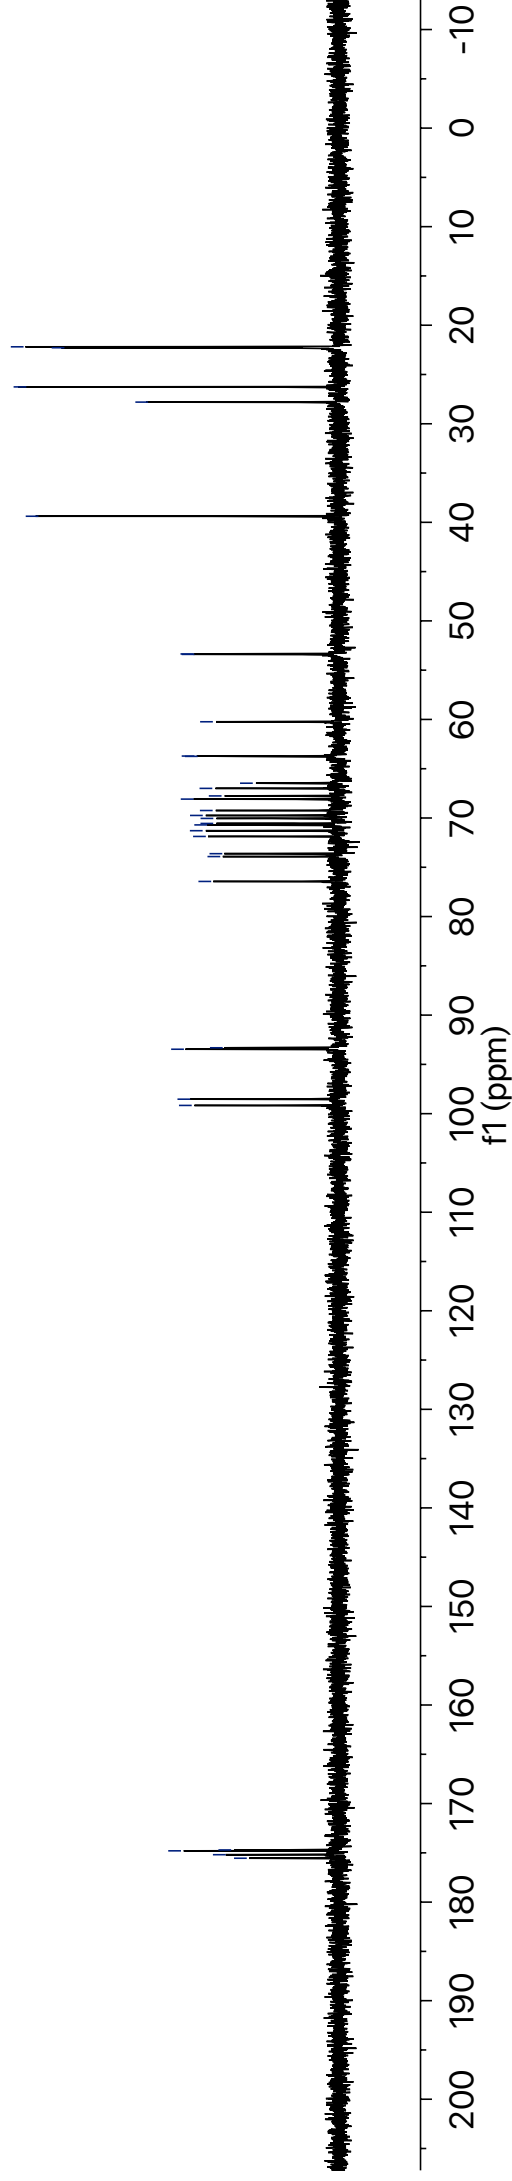

WL-2-199-D-NAc-C-2S-B-NS-6S-A-2S-H-TC-2.1.1.1r

5.30  
5.29  
5.11  
5.07  
5.06  
5.04  
5.03  
4.87  
4.87  
4.42  
4.41  
4.25  
4.25  
4.22  
4.22  
4.14  
3.99  
3.97  
3.96  
3.90  
3.89  
3.87  
3.86  
3.73  
3.72  
3.71  
3.70  
3.67  
3.64  
3.61  
3.61  
3.60  
3.58  
3.39  
3.37  
3.35  
3.21  
3.20  
3.18  
3.17  
2.93  
2.91  
2.89  
1.97  
1.60  
1.58  
1.39  
1.37

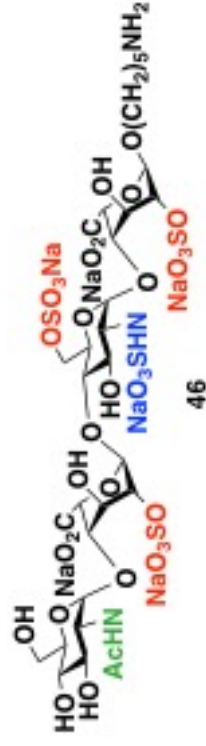

0.98  
3.01  
0.96  
1.00  
6.02  
4.13  
8.28  
1.11  
0.98  
2.00  
2.95  
4.60  
2.04

3.5 10.0 9.5 9.0 8.5 8.0 7.5 7.0 6.5 6.0 5.5 5.0 4.5 4.0 3.5 3.0 2.5 2.0 1.5 1.0 0.5 0.0 -0.5 -1.0

f1 (ppm)

WL-2-199-D-NAc-C-2S-B-NS-6S-A-2S-C-TC.8.1.1r

175.60  
174.80  
174.72

98.93  
98.85  
96.68  
93.48  
76.16  
75.73  
73.70  
71.88  
71.29  
70.66  
69.77  
69.62  
69.14  
68.71  
68.55  
68.07  
67.81  
66.39  
63.86  
60.26  
57.99  
53.37  
39.40

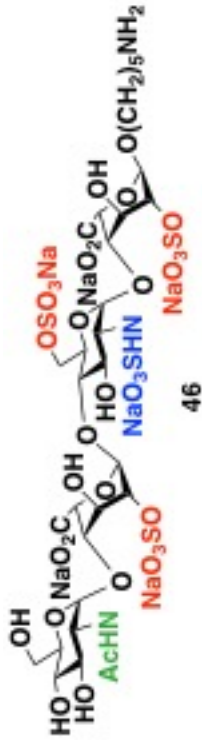

27.83  
26.20  
22.21

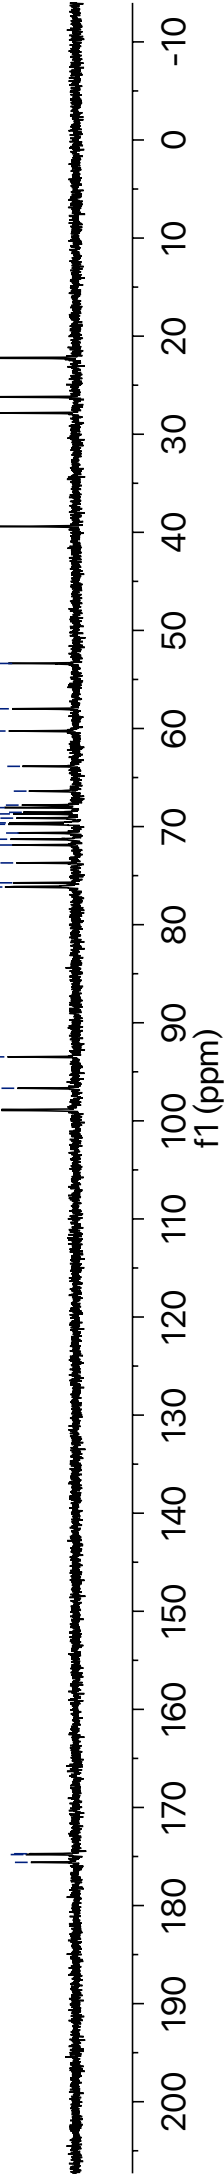

WL-2-310-D-NS-C-2S-B-NAC-6S-A-2S-H-TC.6.1.1r —

5.30  
5.29  
5.12  
5.11  
5.03  
5.02  
5.01  
4.73  
4.72  
4.70  
4.49  
4.48  
4.28  
4.26  
4.26  
4.25  
4.24  
4.23  
4.22  
4.19  
4.18  
4.18  
4.15  
4.14  
4.14  
4.13  
4.13  
4.12  
4.12  
3.99  
3.96  
3.95  
3.93  
3.92  
3.74  
3.73  
3.73  
3.72  
3.71  
3.71  
3.70  
3.70  
3.68  
3.67  
3.66  
3.65  
3.63  
3.58  
3.58  
3.56  
3.55  
3.53  
3.38  
3.36  
3.14  
3.13  
3.11  
3.10  
2.93  
2.89  
1.96  
1.62  
1.60  
1.59  
1.58  
1.39  
1.37

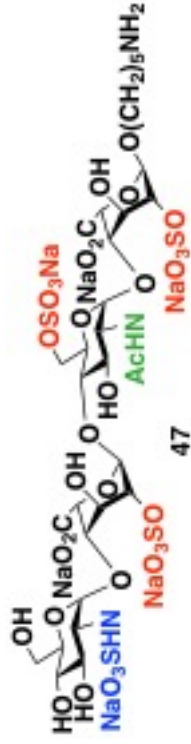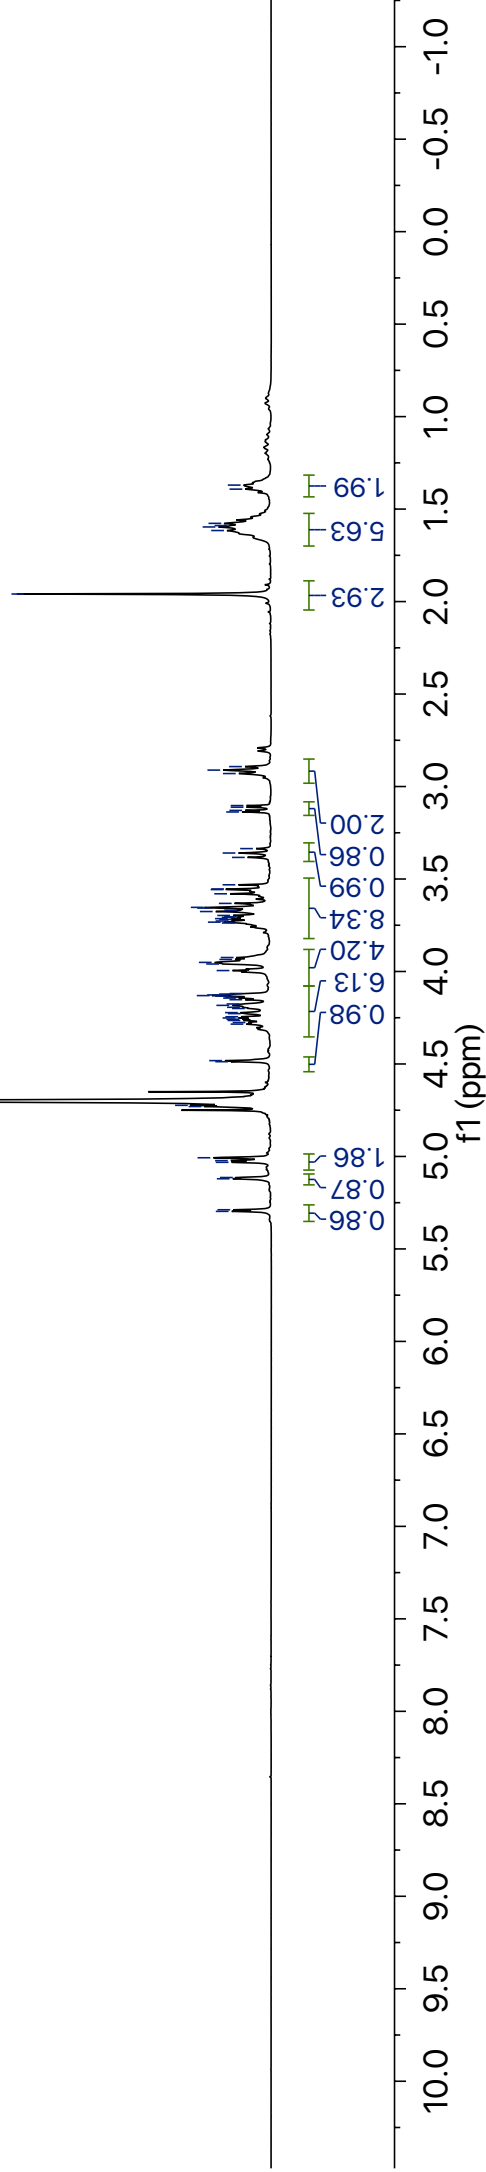



WL-2-310-D-NS-C-2S-B-NAc-6S-A-2S-C-TC.1.1.1r —

175.06  
174.87  
174.70

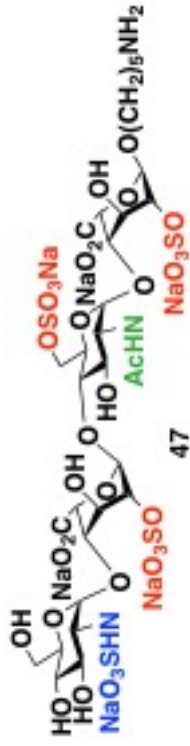

99.31  
98.56  
96.95  
93.37  
76.17  
75.66  
75.45  
73.96  
71.67  
71.04  
70.81  
69.95  
69.90  
69.32  
68.93  
68.67  
68.10  
66.99  
66.46  
63.77  
60.25  
58.06  
53.33  
39.38

29.79  
27.80  
26.22  
24.93  
22.28  
22.18

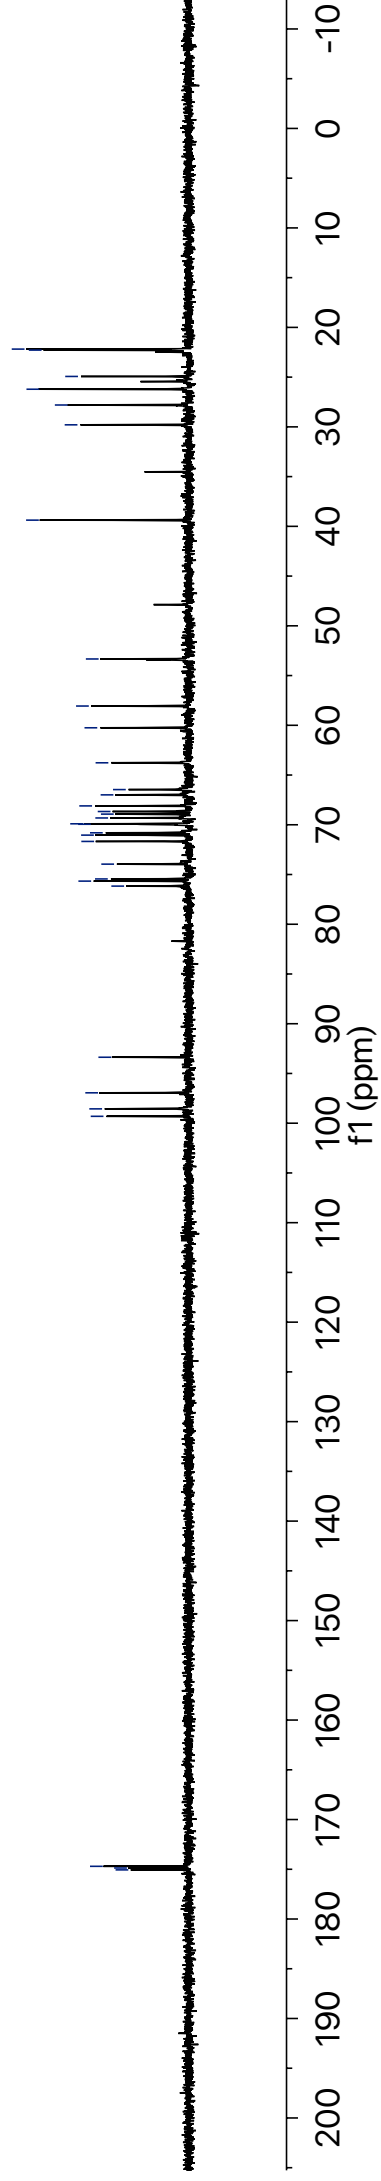

WL-2-D-NS-C-2S-B-NS-6S-A-2S-H-TC.7.1.1r —

5.32  
5.31  
5.30  
5.29  
5.14  
5.14  
5.05  
5.05  
5.04  
4.78  
4.77  
4.45  
4.44  
4.31  
4.27  
4.26  
4.25  
4.25  
4.15  
4.14  
4.14  
4.02  
4.02  
4.01  
4.00  
3.99  
3.75  
3.74  
3.73  
3.72  
3.69  
3.67  
3.62  
3.60  
3.60  
3.59  
3.57  
3.57  
3.56  
3.54  
3.37  
3.22  
3.15  
3.14  
3.12  
3.12  
2.94  
2.92  
2.92  
2.90  
1.60  
1.58  
1.40  
1.38

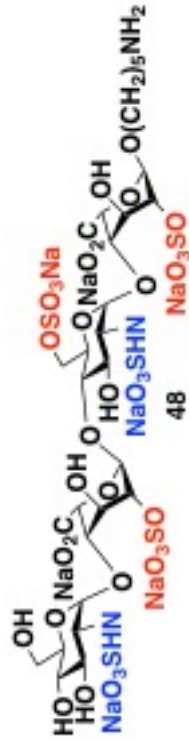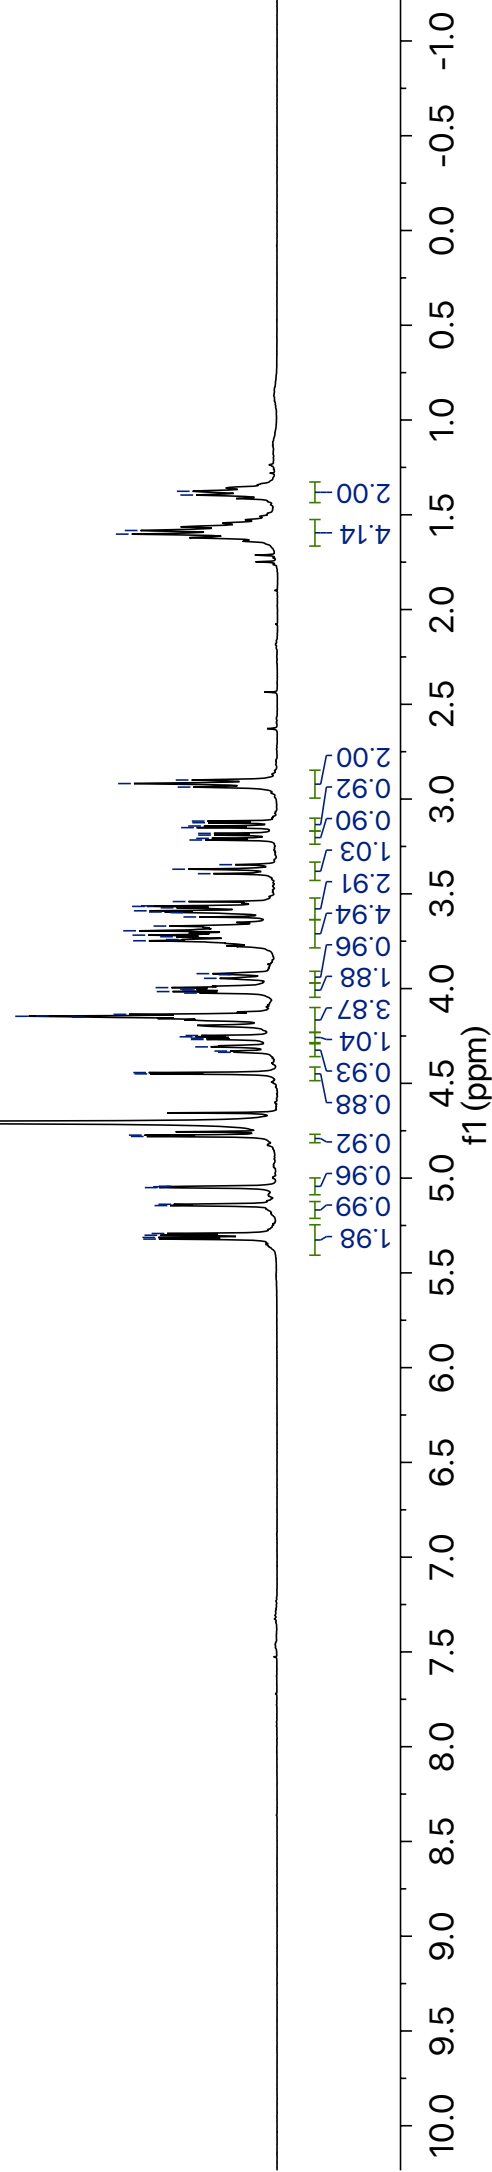

WL-2-D-NS-C-2S-B-NS-6S-A-2S-C-TC.1.1.r

174.84  
174.53

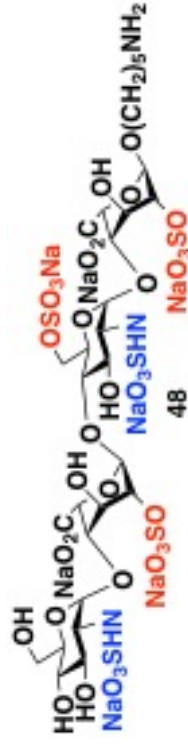

99.12  
98.87  
96.91  
96.83  
76.13  
75.82  
75.72  
75.63  
71.70  
71.05  
69.92  
69.52  
69.21  
69.06  
68.85  
68.64  
68.45  
68.11  
66.34  
60.27  
58.05  
57.93  
39.40  
27.83  
26.21  
22.22

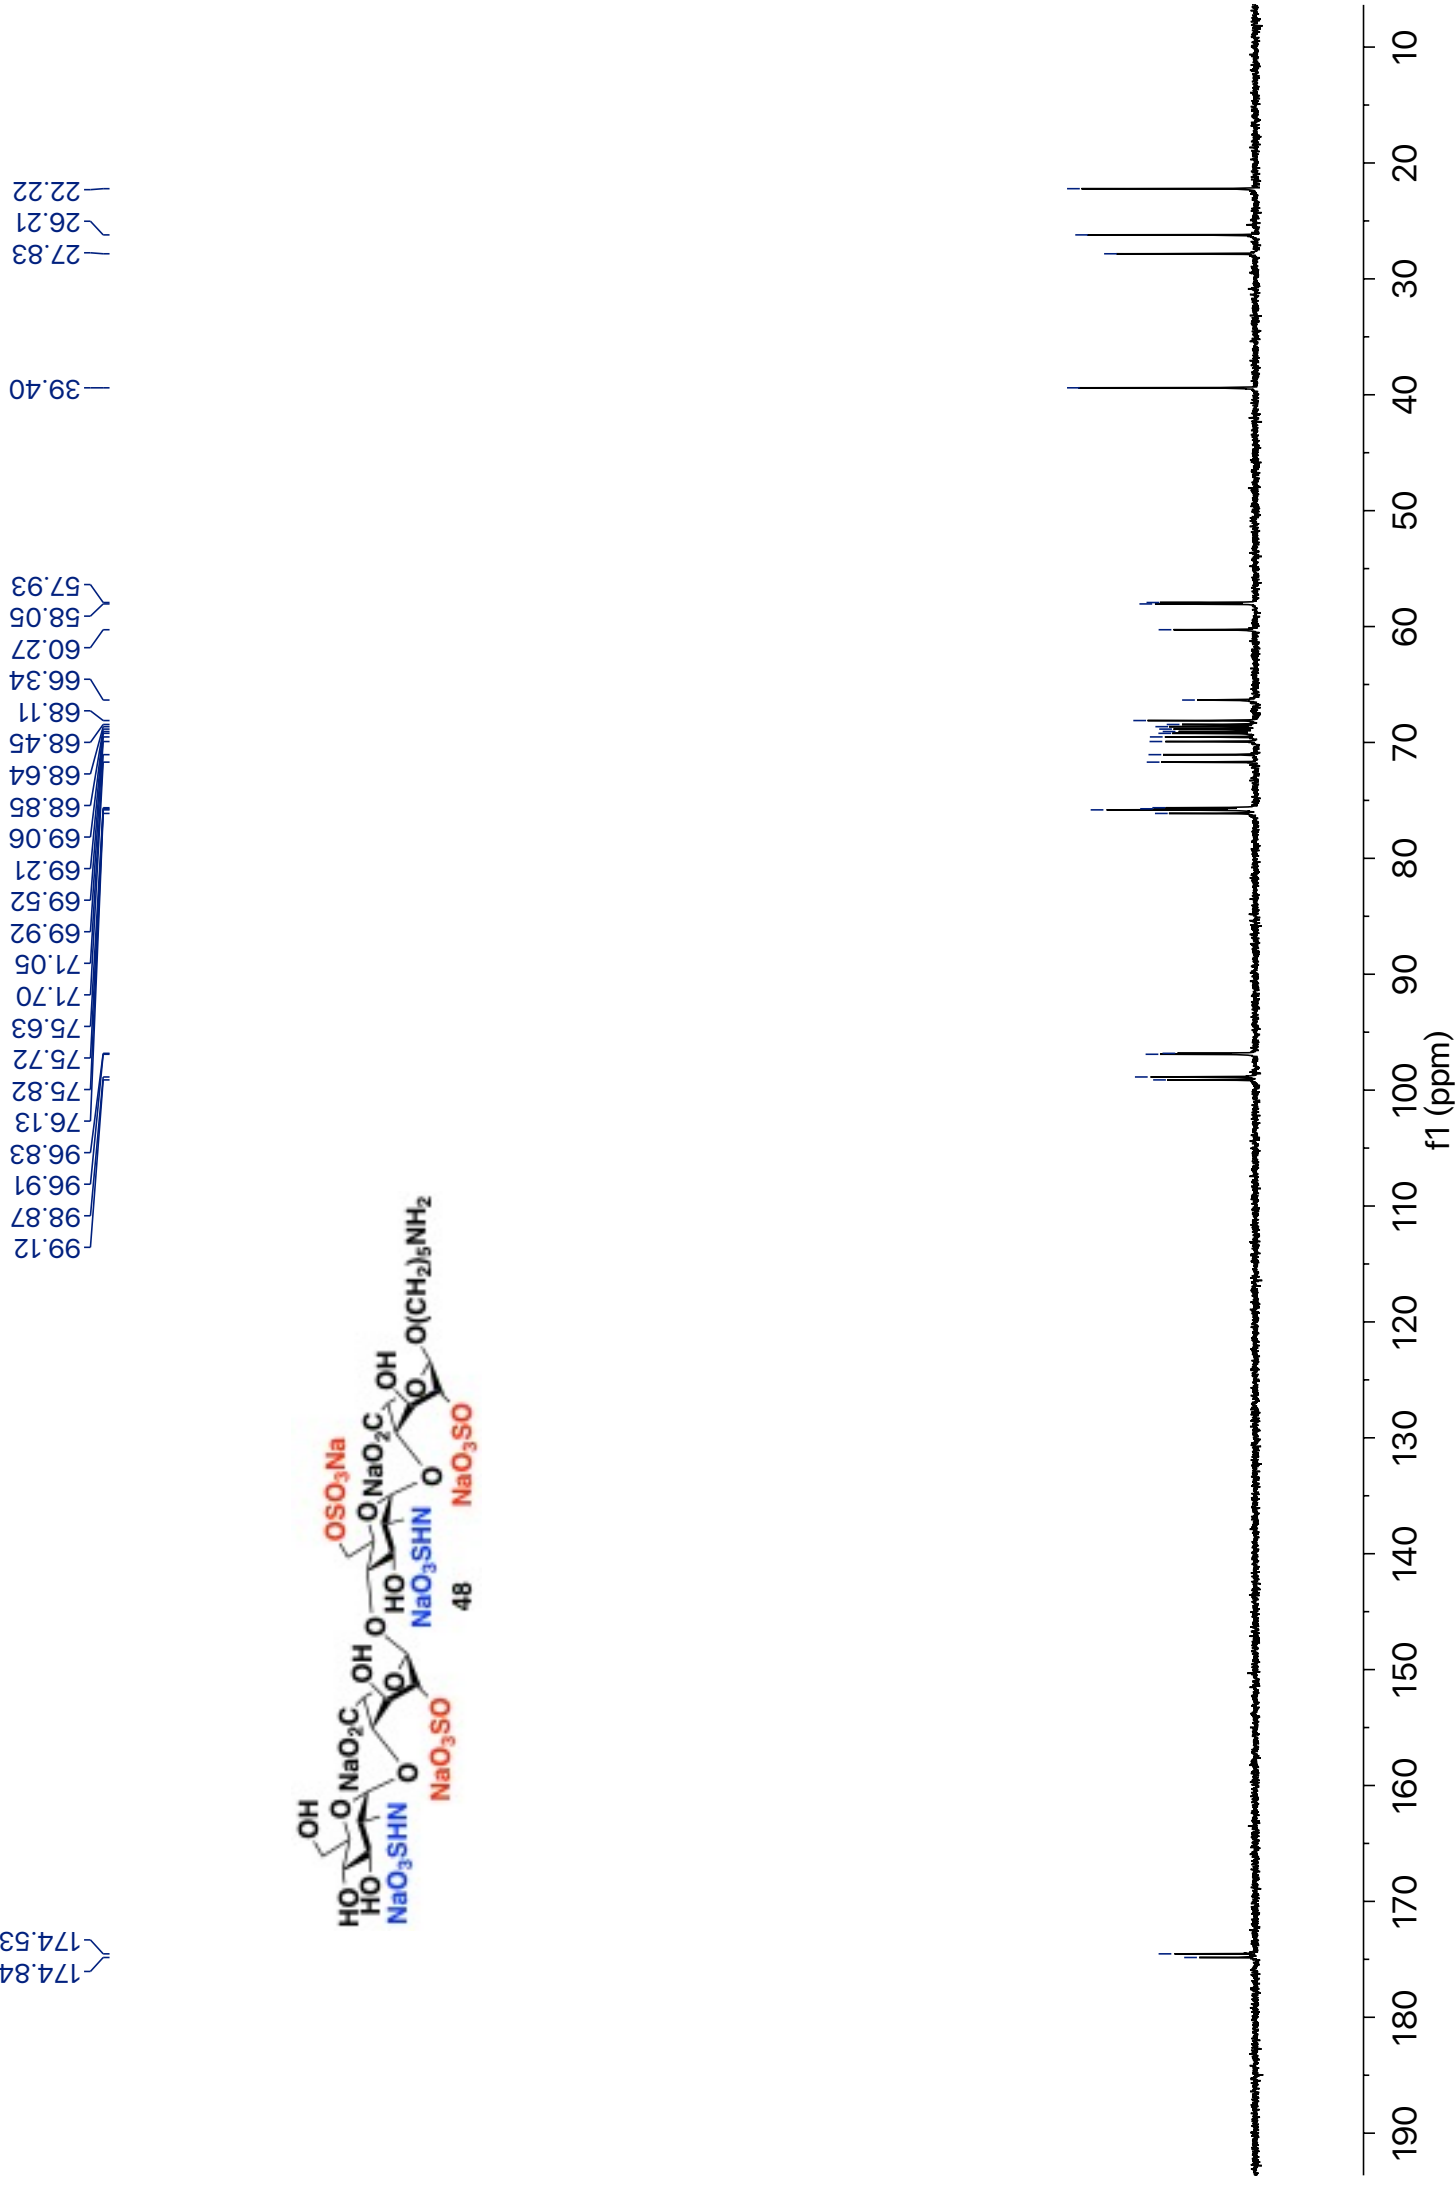

WL-2-263-run2-D-NAc-6S-B-NAc-6S-A-2S-TC-H.7.1r —

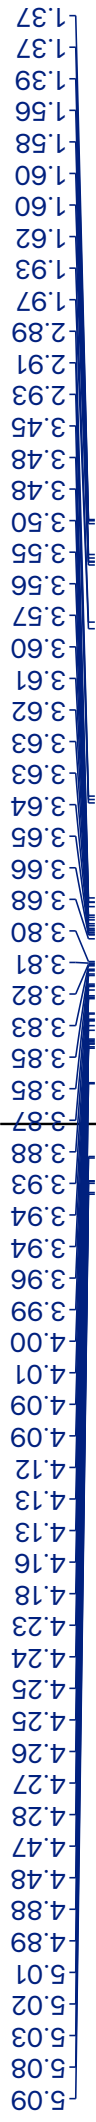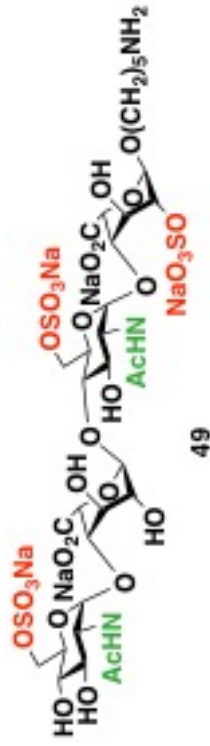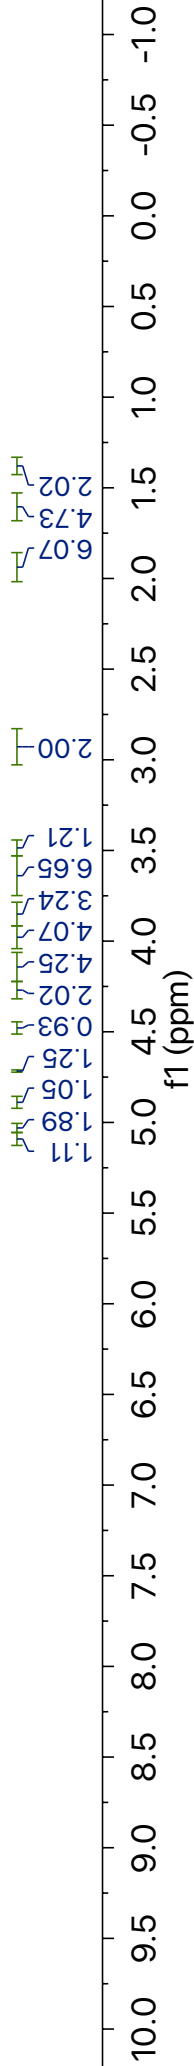

175.12  
174.72  
174.42

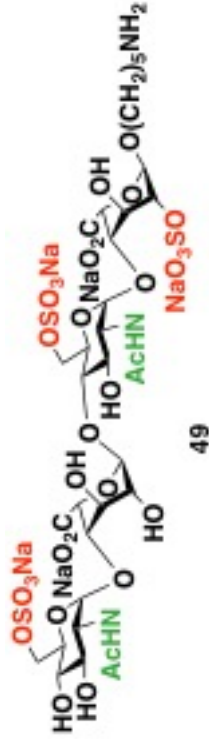

101.84  
98.52  
94.43  
93.75  
76.73  
74.07  
73.88  
71.05  
70.14  
69.97  
69.33  
69.14  
69.00  
68.83  
68.10  
66.91  
66.38  
66.19  
63.98  
53.37  
39.37  
27.76  
26.23  
22.26  
22.19  
21.93

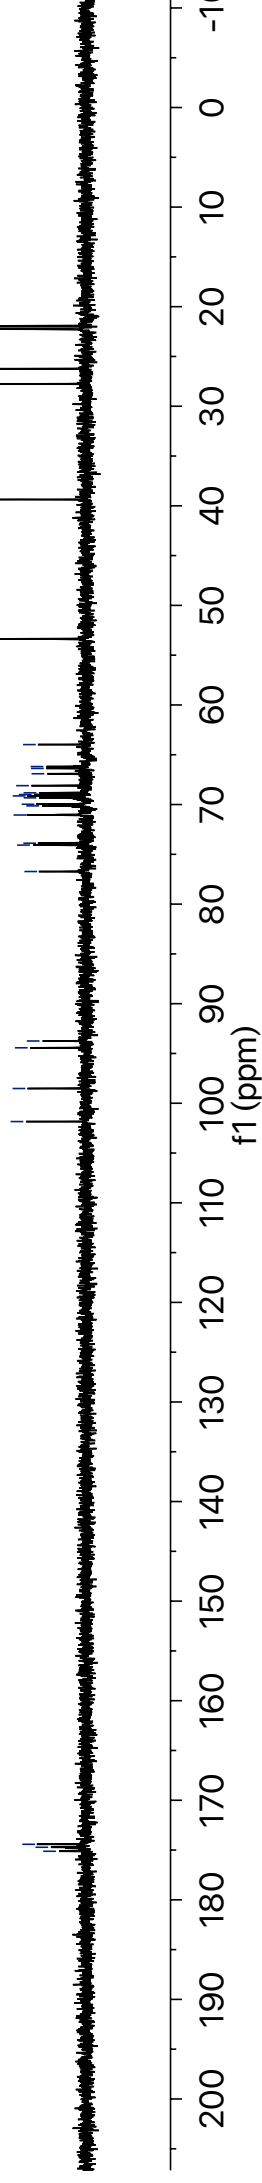

WL-2-269-D-NAc-6S-B-NS-6S-A-2S-HSQC.1.1.r

5.29  
5.28  
5.08  
5.08  
5.04  
5.04  
4.91  
4.90  
4.42  
4.41  
4.29  
4.28  
4.26  
4.26  
4.24  
4.23  
4.17  
4.16  
4.14  
4.13  
4.09  
4.09  
3.99  
3.97  
3.96  
3.90  
3.88  
3.87  
3.86  
3.85  
3.84  
3.83  
3.82  
3.81  
3.80  
3.67  
3.65  
3.64  
3.63  
3.63  
3.61  
3.58  
3.58  
3.58  
3.50  
3.48  
3.46  
3.20  
3.19  
3.18  
3.17  
2.93  
2.91  
2.89  
1.93  
1.61  
1.59  
1.57  
1.41  
1.39  
1.37

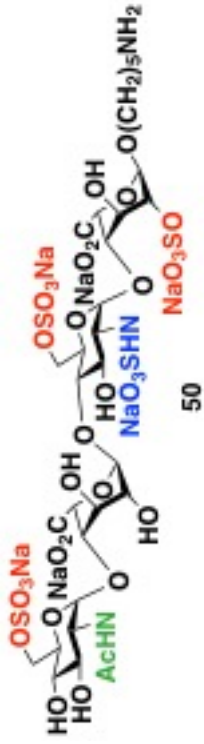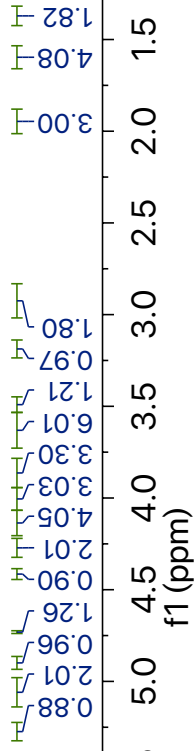

10.0 9.5 9.0 8.5 8.0 7.5 7.0 6.5 6.0 5.5 5.0 4.5 4.0 3.5 3.0 2.5 2.0 1.5 1.0 0.5 0.0 -0.5 -1.0 -1.5

WL-2-269-D-NAc-6S-B-NS-6S-A-2S-C-TC.5.1.1r

175.06  
174.75  
174.42

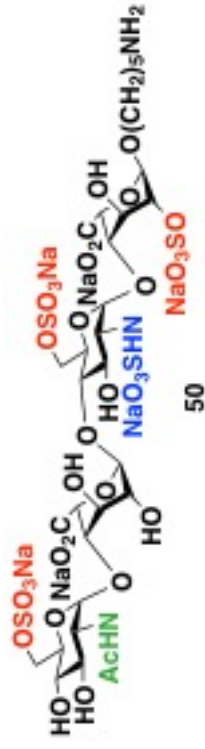

101.69  
98.78  
96.93  
94.37  
76.84  
76.00  
75.93  
74.00  
71.02  
70.10  
69.60  
69.27  
69.18  
69.04  
68.99  
68.71  
68.61  
68.38  
68.04  
66.36  
66.24  
58.02  
53.39  
39.39  
27.79  
26.19  
22.21  
21.93

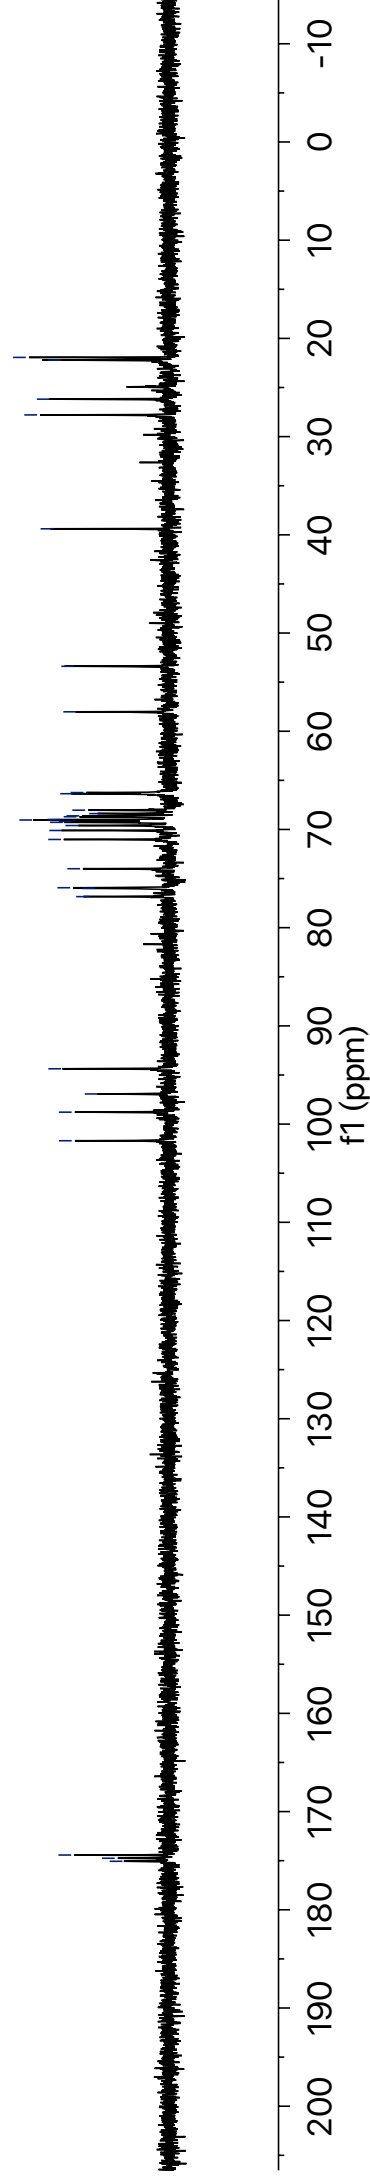

WL-2-290-D-6S-NS-B-6S-NAC-A-2S-H-TC.7.1.r

5.28  
5.27  
5.02  
4.92  
4.91  
4.77  
4.76  
4.75  
4.71  
4.49  
4.49  
4.28  
4.26  
4.26  
4.24  
4.23  
4.19  
4.17  
4.16  
4.14  
4.14  
4.14  
4.13  
4.11  
4.10  
4.08  
4.04  
4.03  
3.99  
3.94  
3.83  
3.81  
3.67  
3.66  
3.64  
3.58  
3.57  
3.54  
3.52  
3.50  
3.48  
3.16  
3.15  
3.13  
3.12  
2.94  
2.92  
2.90  
1.98  
1.61  
1.59  
1.40  
1.38  
1.37

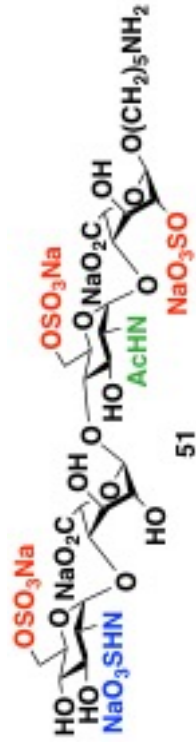

0.94  
1.94  
0.99  
0.94  
0.85  
1.95  
2.89  
0.97  
0.92  
1.32  
2.29  
0.90  
4.13  
3.05  
0.88  
2.00  
2.69  
4.85  
1.97

10.0 9.5 9.0 8.5 8.0 7.5 7.0 6.5 6.0 5.5 5.0 4.5 4.0 3.5 3.0 2.5 2.0 1.5 1.0 0.5 0.0 -0.5 -1.0

f1 (ppm)



WL-2-290-D-6S-NS-B-6S-NAC-A-2S-C-TC.1.1.1r —

175.11  
174.99  
174.75

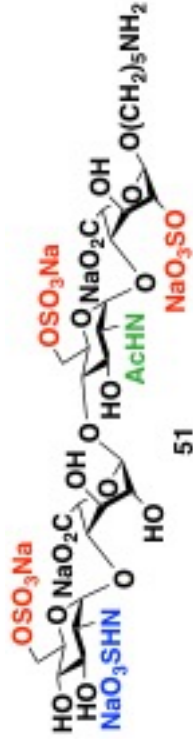

102.00  
98.51  
95.64  
93.75  
77.31  
74.37  
73.83  
71.12  
71.03  
70.00  
69.95  
69.16  
69.03  
68.48  
68.33  
68.15  
67.65  
66.88  
66.38  
66.22  
63.90  
57.66  
53.43  
39.38  
27.78  
26.27  
22.28  
22.21

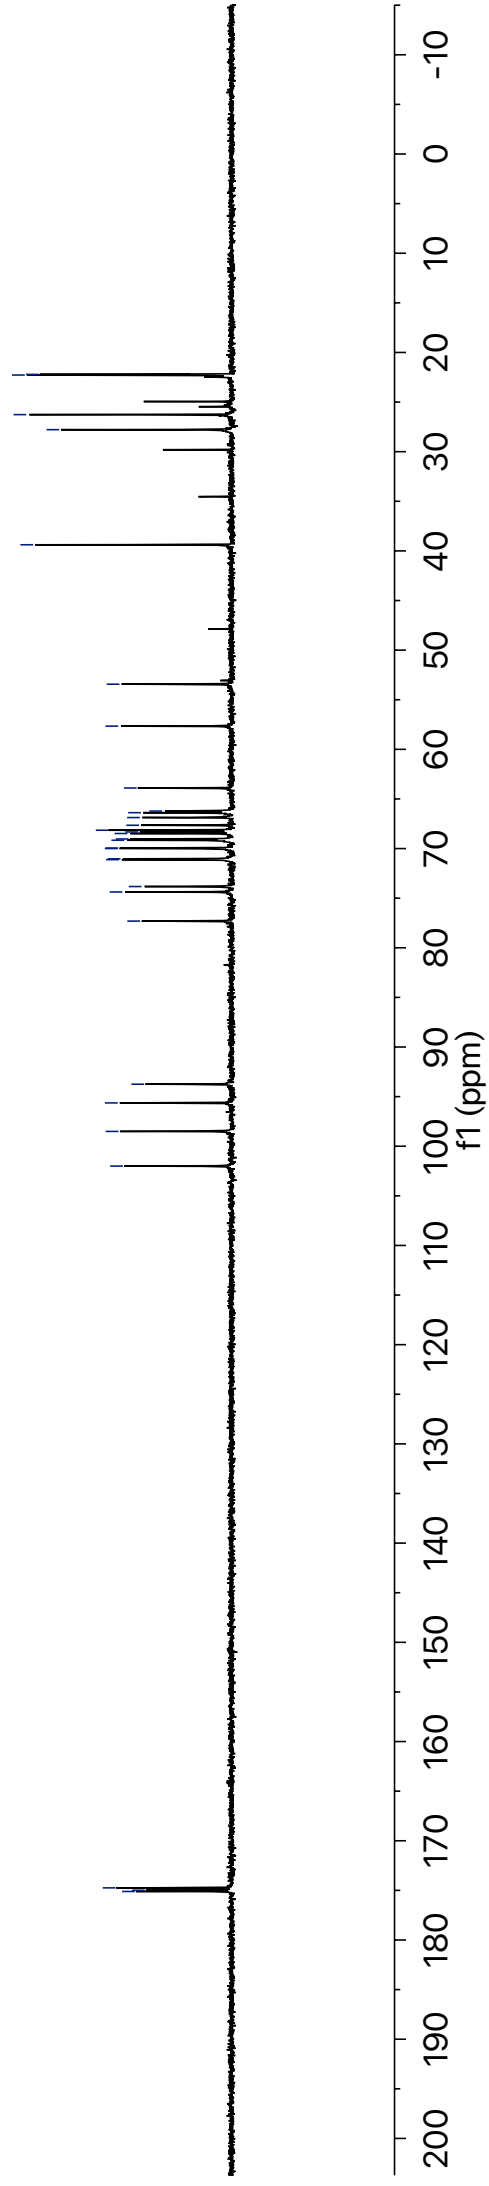

5.29  
5.28  
5.27  
5.26  
5.05  
5.05  
4.94  
4.93  
4.81  
4.81  
4.75  
4.72  
4.71  
4.70  
4.67  
4.65  
4.44  
4.44  
4.26  
4.26  
4.17  
4.16  
4.15  
4.14  
4.14  
4.10  
4.10  
4.04  
3.97  
3.97  
3.97  
3.97  
3.71  
3.71  
3.64  
3.64  
3.62  
3.60  
3.58  
3.57  
3.57  
3.55  
3.52  
3.50  
3.48  
3.15  
3.15  
2.91  
2.89  
1.60  
1.58  
1.57  
1.56  
1.52  
1.49

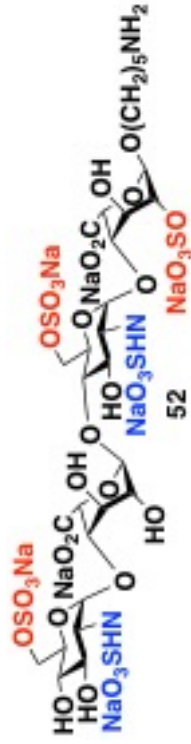

1.97  
0.94  
0.92  
0.91  
0.95  
1.99  
3.97  
1.07  
3.01  
0.98  
1.02  
6.23  
1.93  
2.00  
3.81  
2.05

10.0 9.5 9.0 8.5 8.0 7.5 7.0 6.5 6.0 5.5 5.0 4.5 4.0 3.5 3.0 2.5 2.0 1.5 1.0 0.5 0.0 -0.5 -1.0

f1 (ppm)

WL-2-283-D-NS-6S-B-NS-6S-A-2S-C-TC.1.1.r —

174.99  
174.62

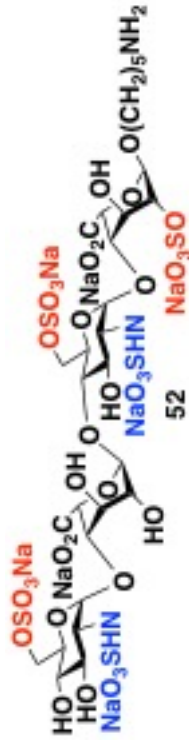

101.86  
98.75  
97.06  
95.72  
77.49  
75.95  
75.79  
74.32  
71.11  
69.96  
69.59  
69.05  
68.42  
68.33  
68.17  
68.09  
67.45  
66.37  
66.25  
58.08  
57.66  
39.38  
27.79  
26.20  
22.20

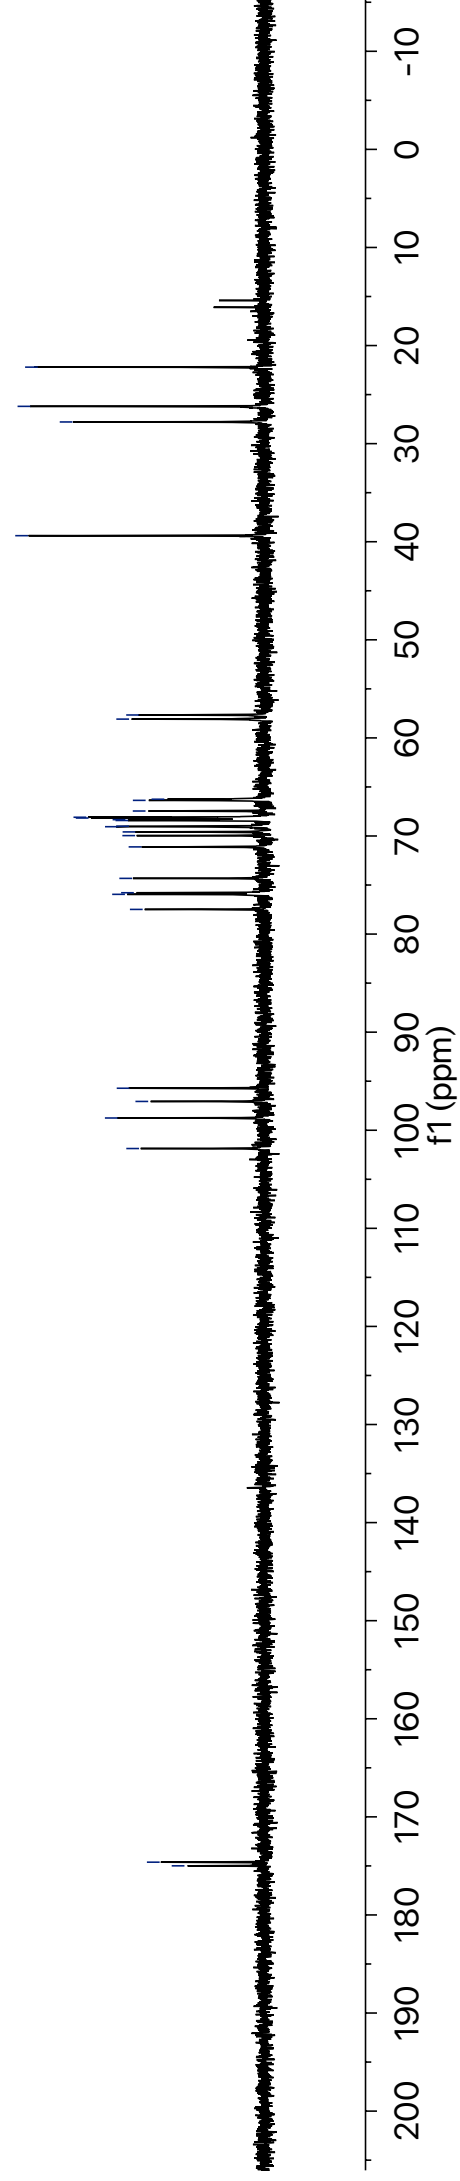

WL-2-156-D-NAC-6SO3-C-2SO3-B-NAC-A-2SO3-H-TC.2.1.1r

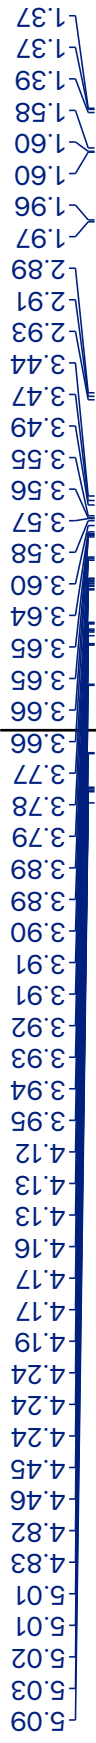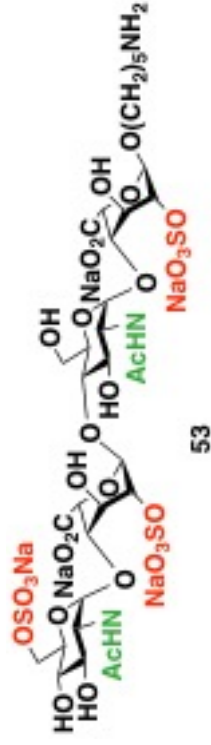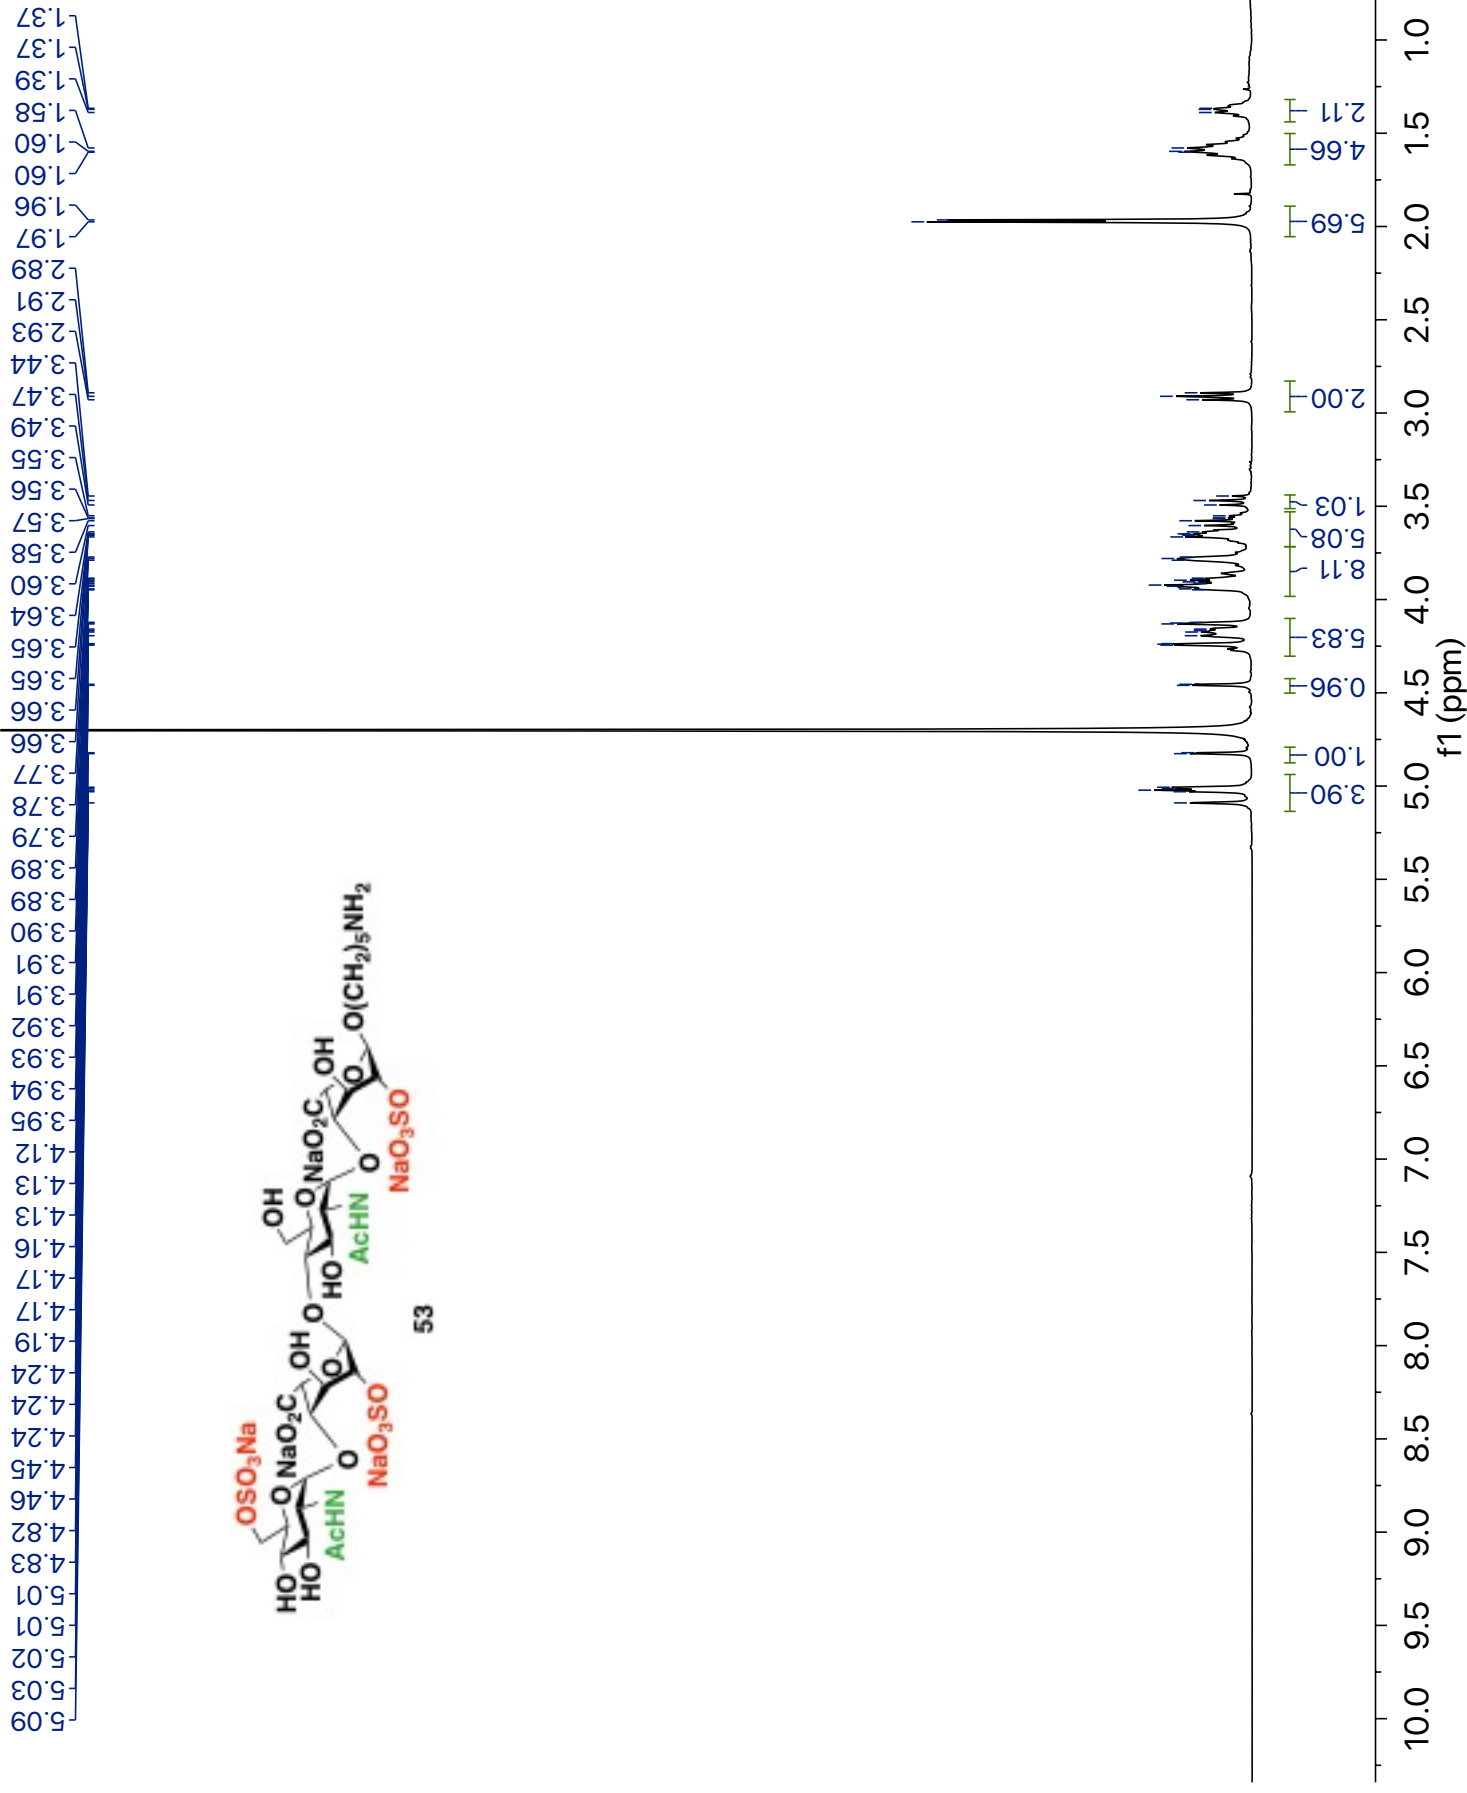

WL-2-156-D-NAC-6SO3-C-2SO3-B-NAC-A-2SO3-C-TC.1.1.r —

175.72  
175.22  
174.77  
174.72

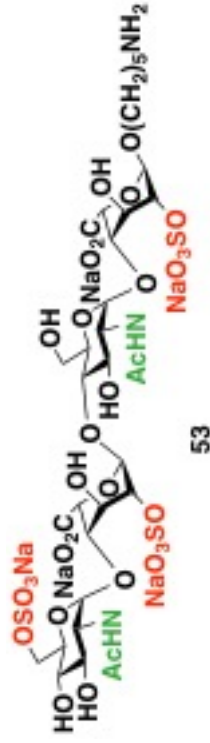

99.22  
98.54  
93.60  
93.47  
77.20  
73.99  
73.23  
71.21  
70.71  
70.44  
70.02  
69.82  
69.13  
68.11  
67.25  
67.09  
66.44  
63.87  
63.25  
59.67  
53.69  
53.21  
39.37

27.78  
26.23  
22.24  
22.16

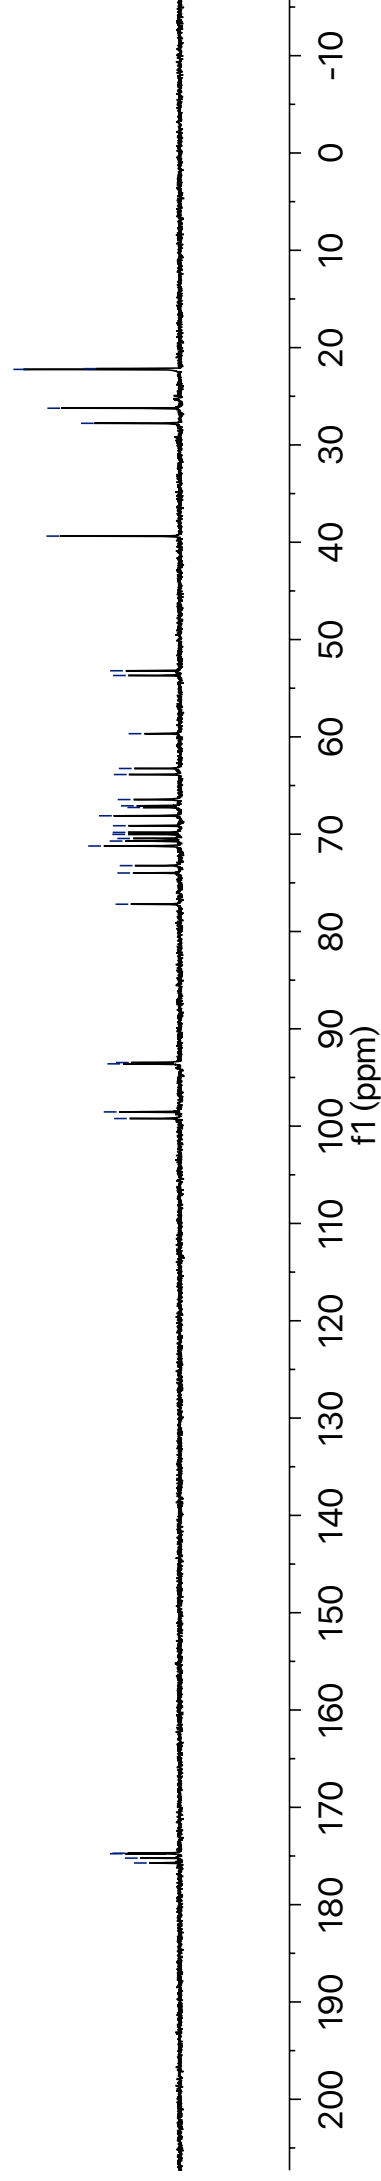

c-6SO3-C-2SO3-B-NSO3-6SO3-H-TC.2.1.1r —

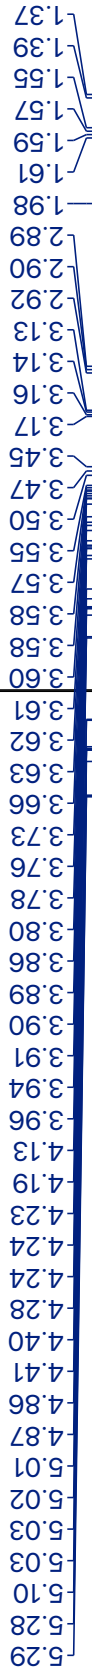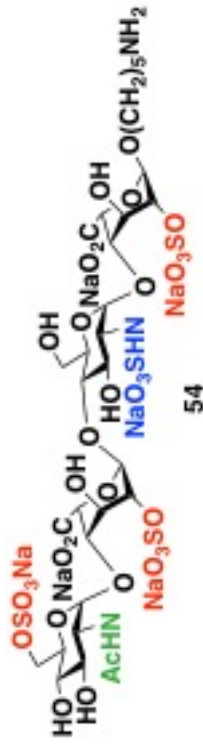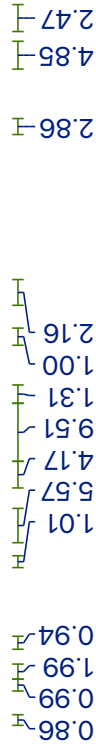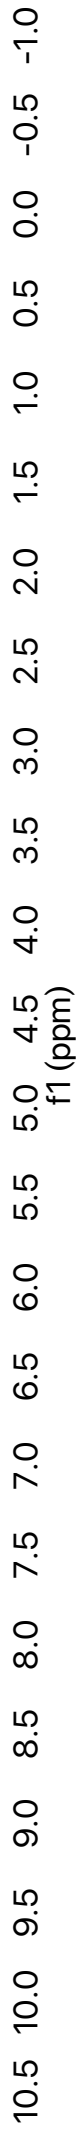

WL-2-152-D-Nac-6SO3-C-2SO3-B-NSO3-6SO3-C-TC.1.1.1r

99.1  
98.84  
96.74  
93.62  
77.37  
76.19  
75.75  
73.22  
71.19  
71.04  
70.48  
70.01  
69.47  
69.12  
68.77  
68.58  
68.05  
67.27  
66.43  
63.28  
59.70  
58.31  
53.21  
39.40  
27.81  
26.22  
22.23  
22.19

175.2  
174.8  
174.2

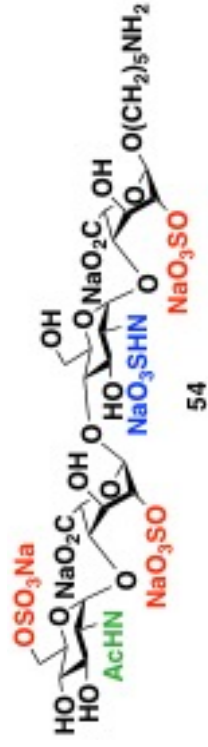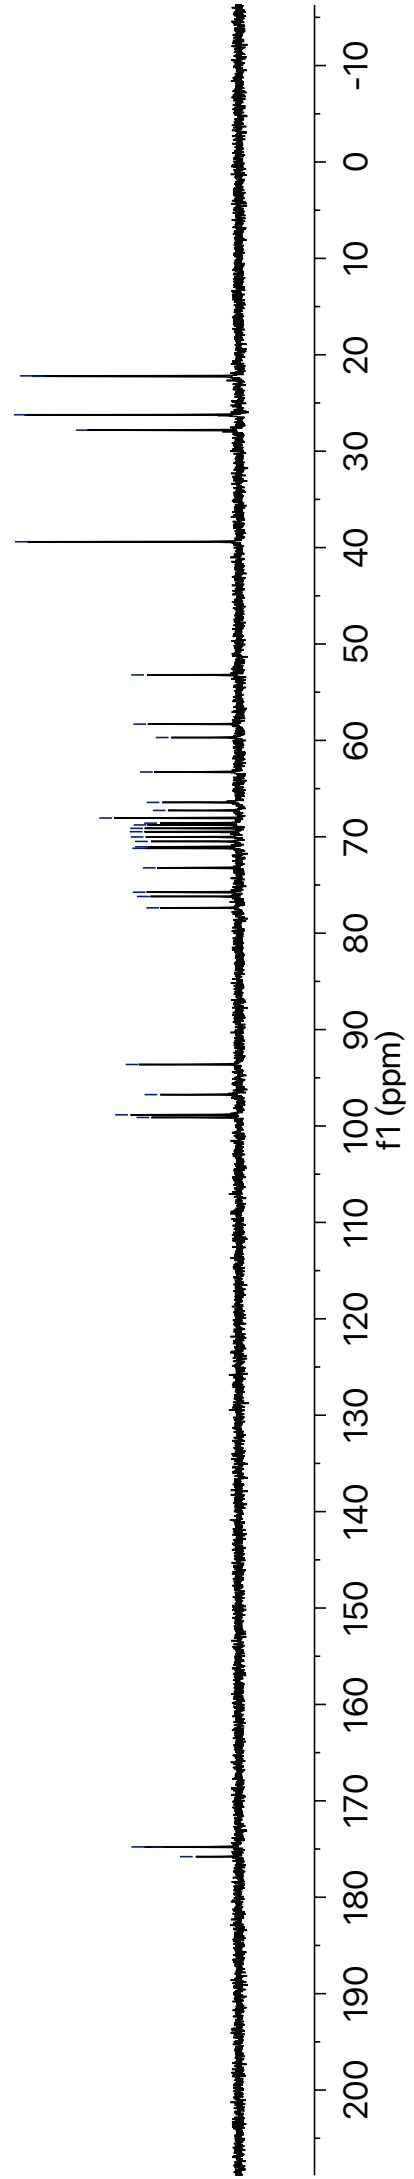

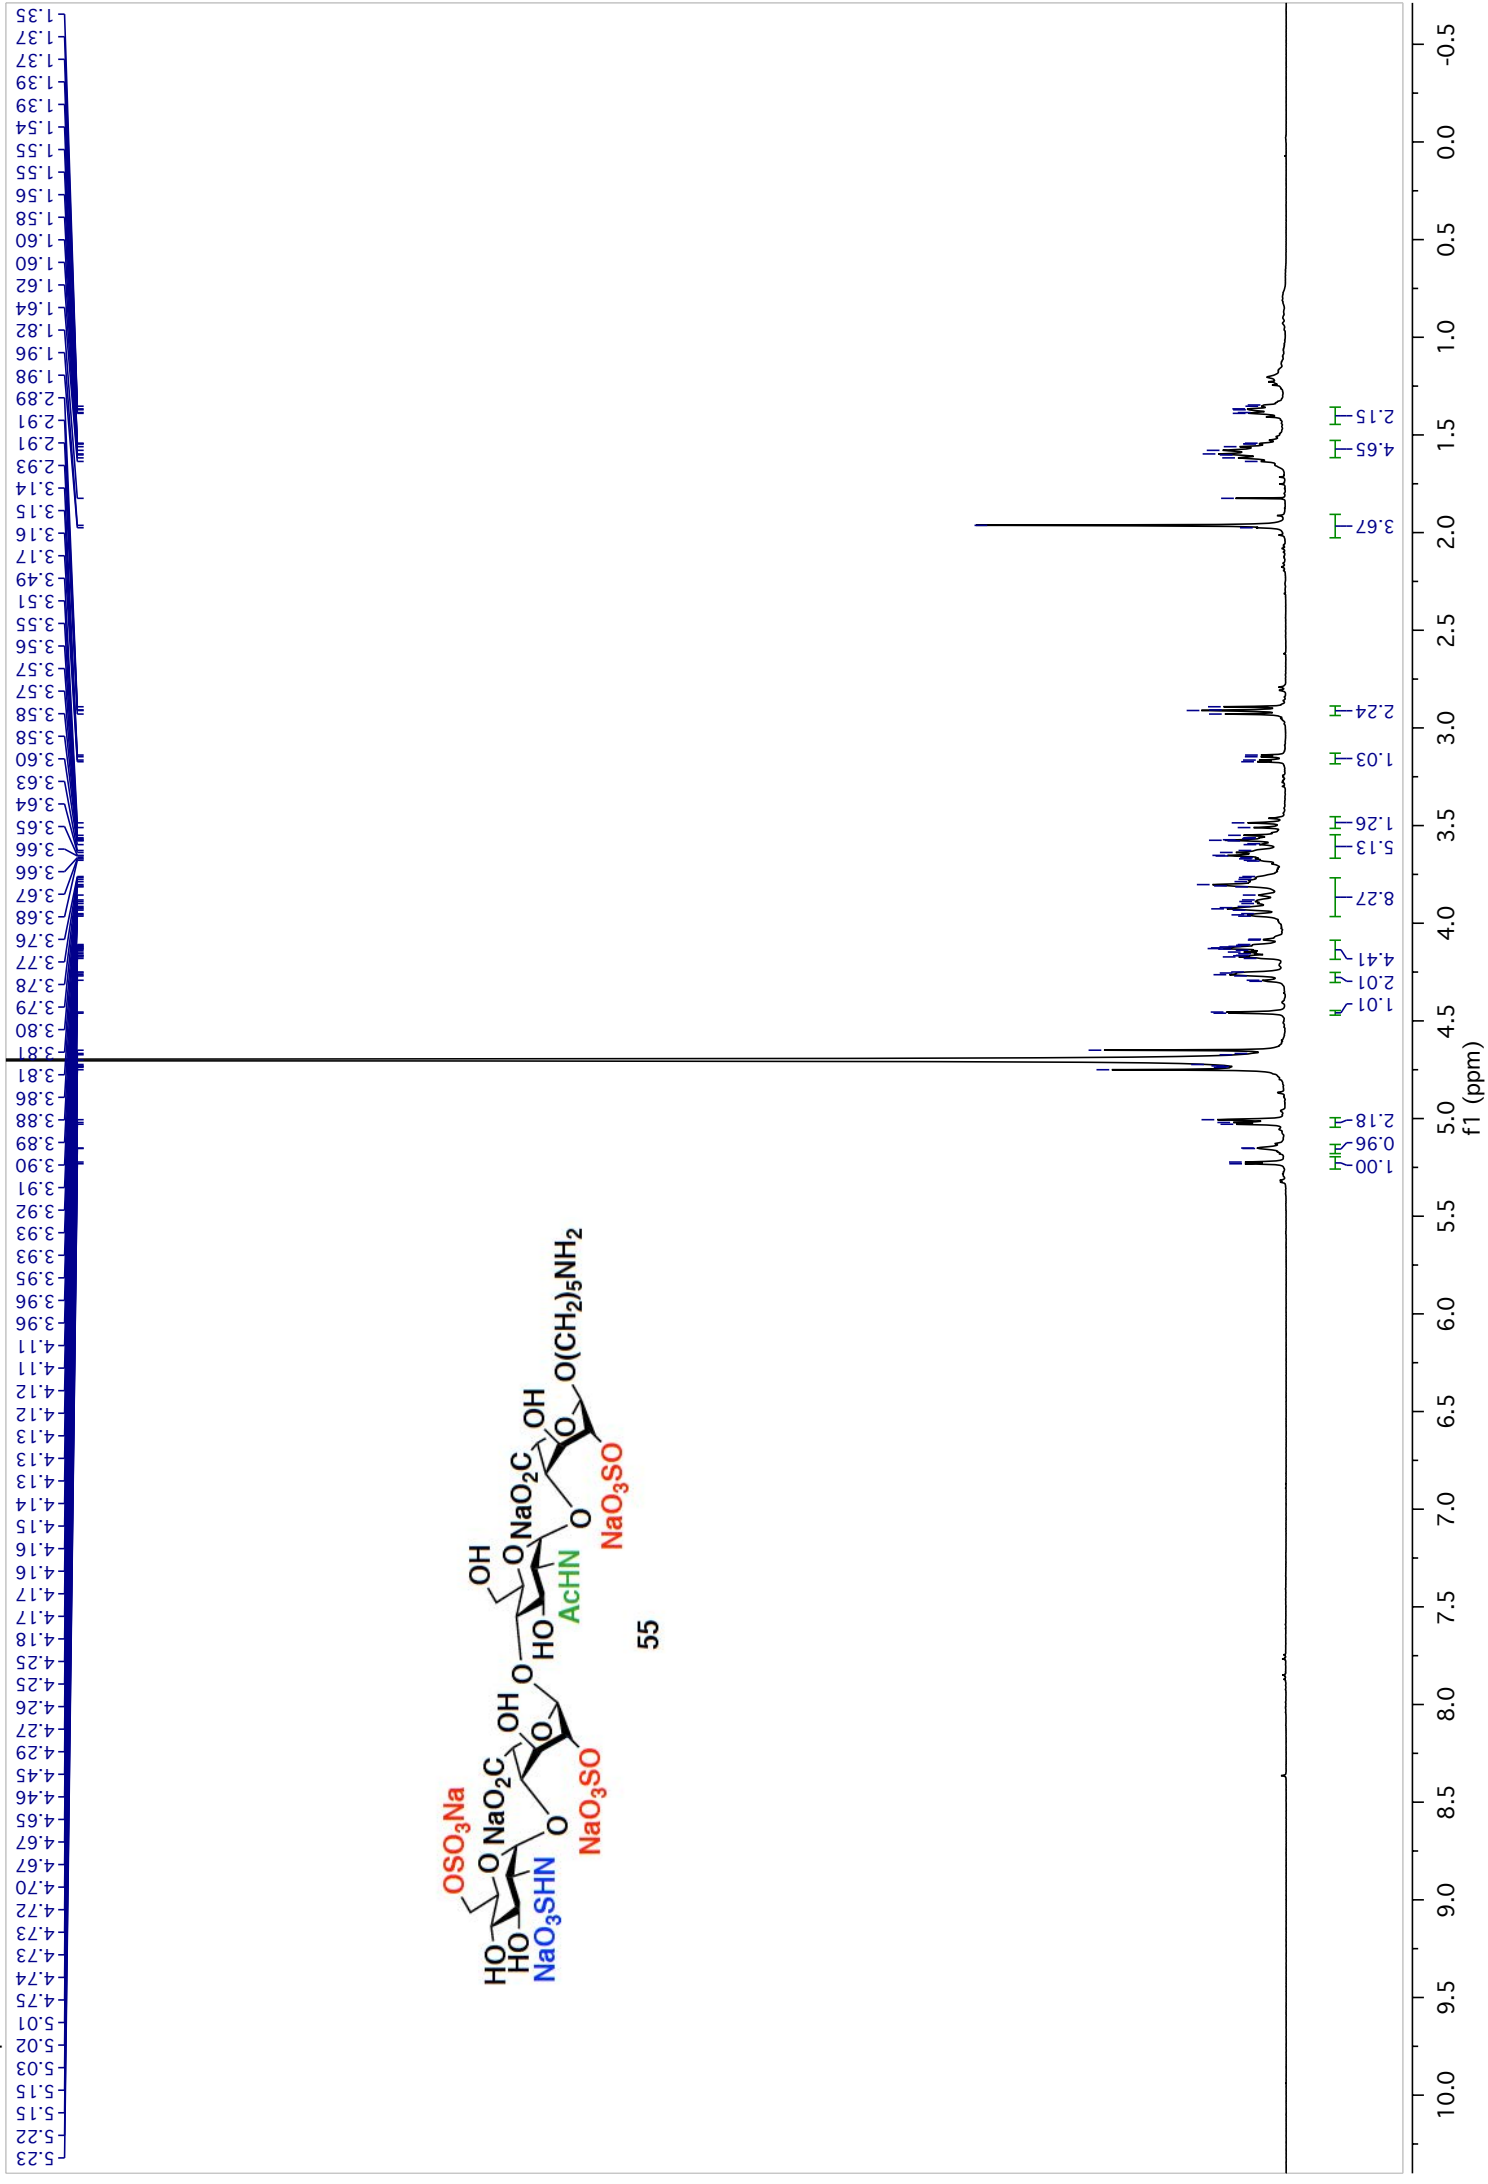



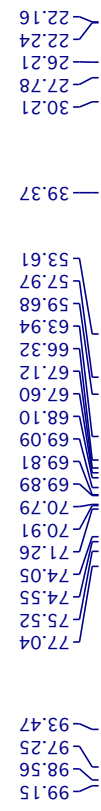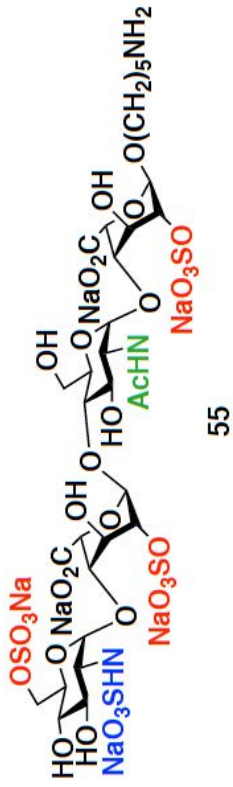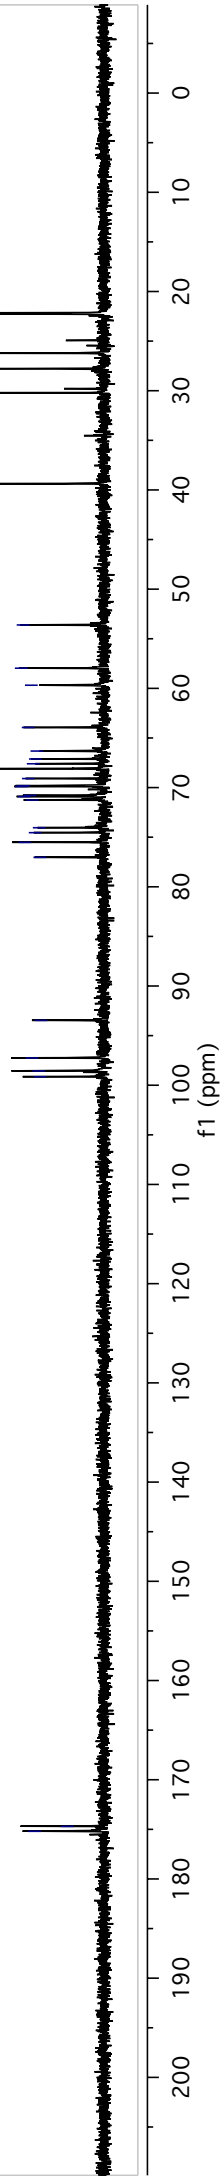

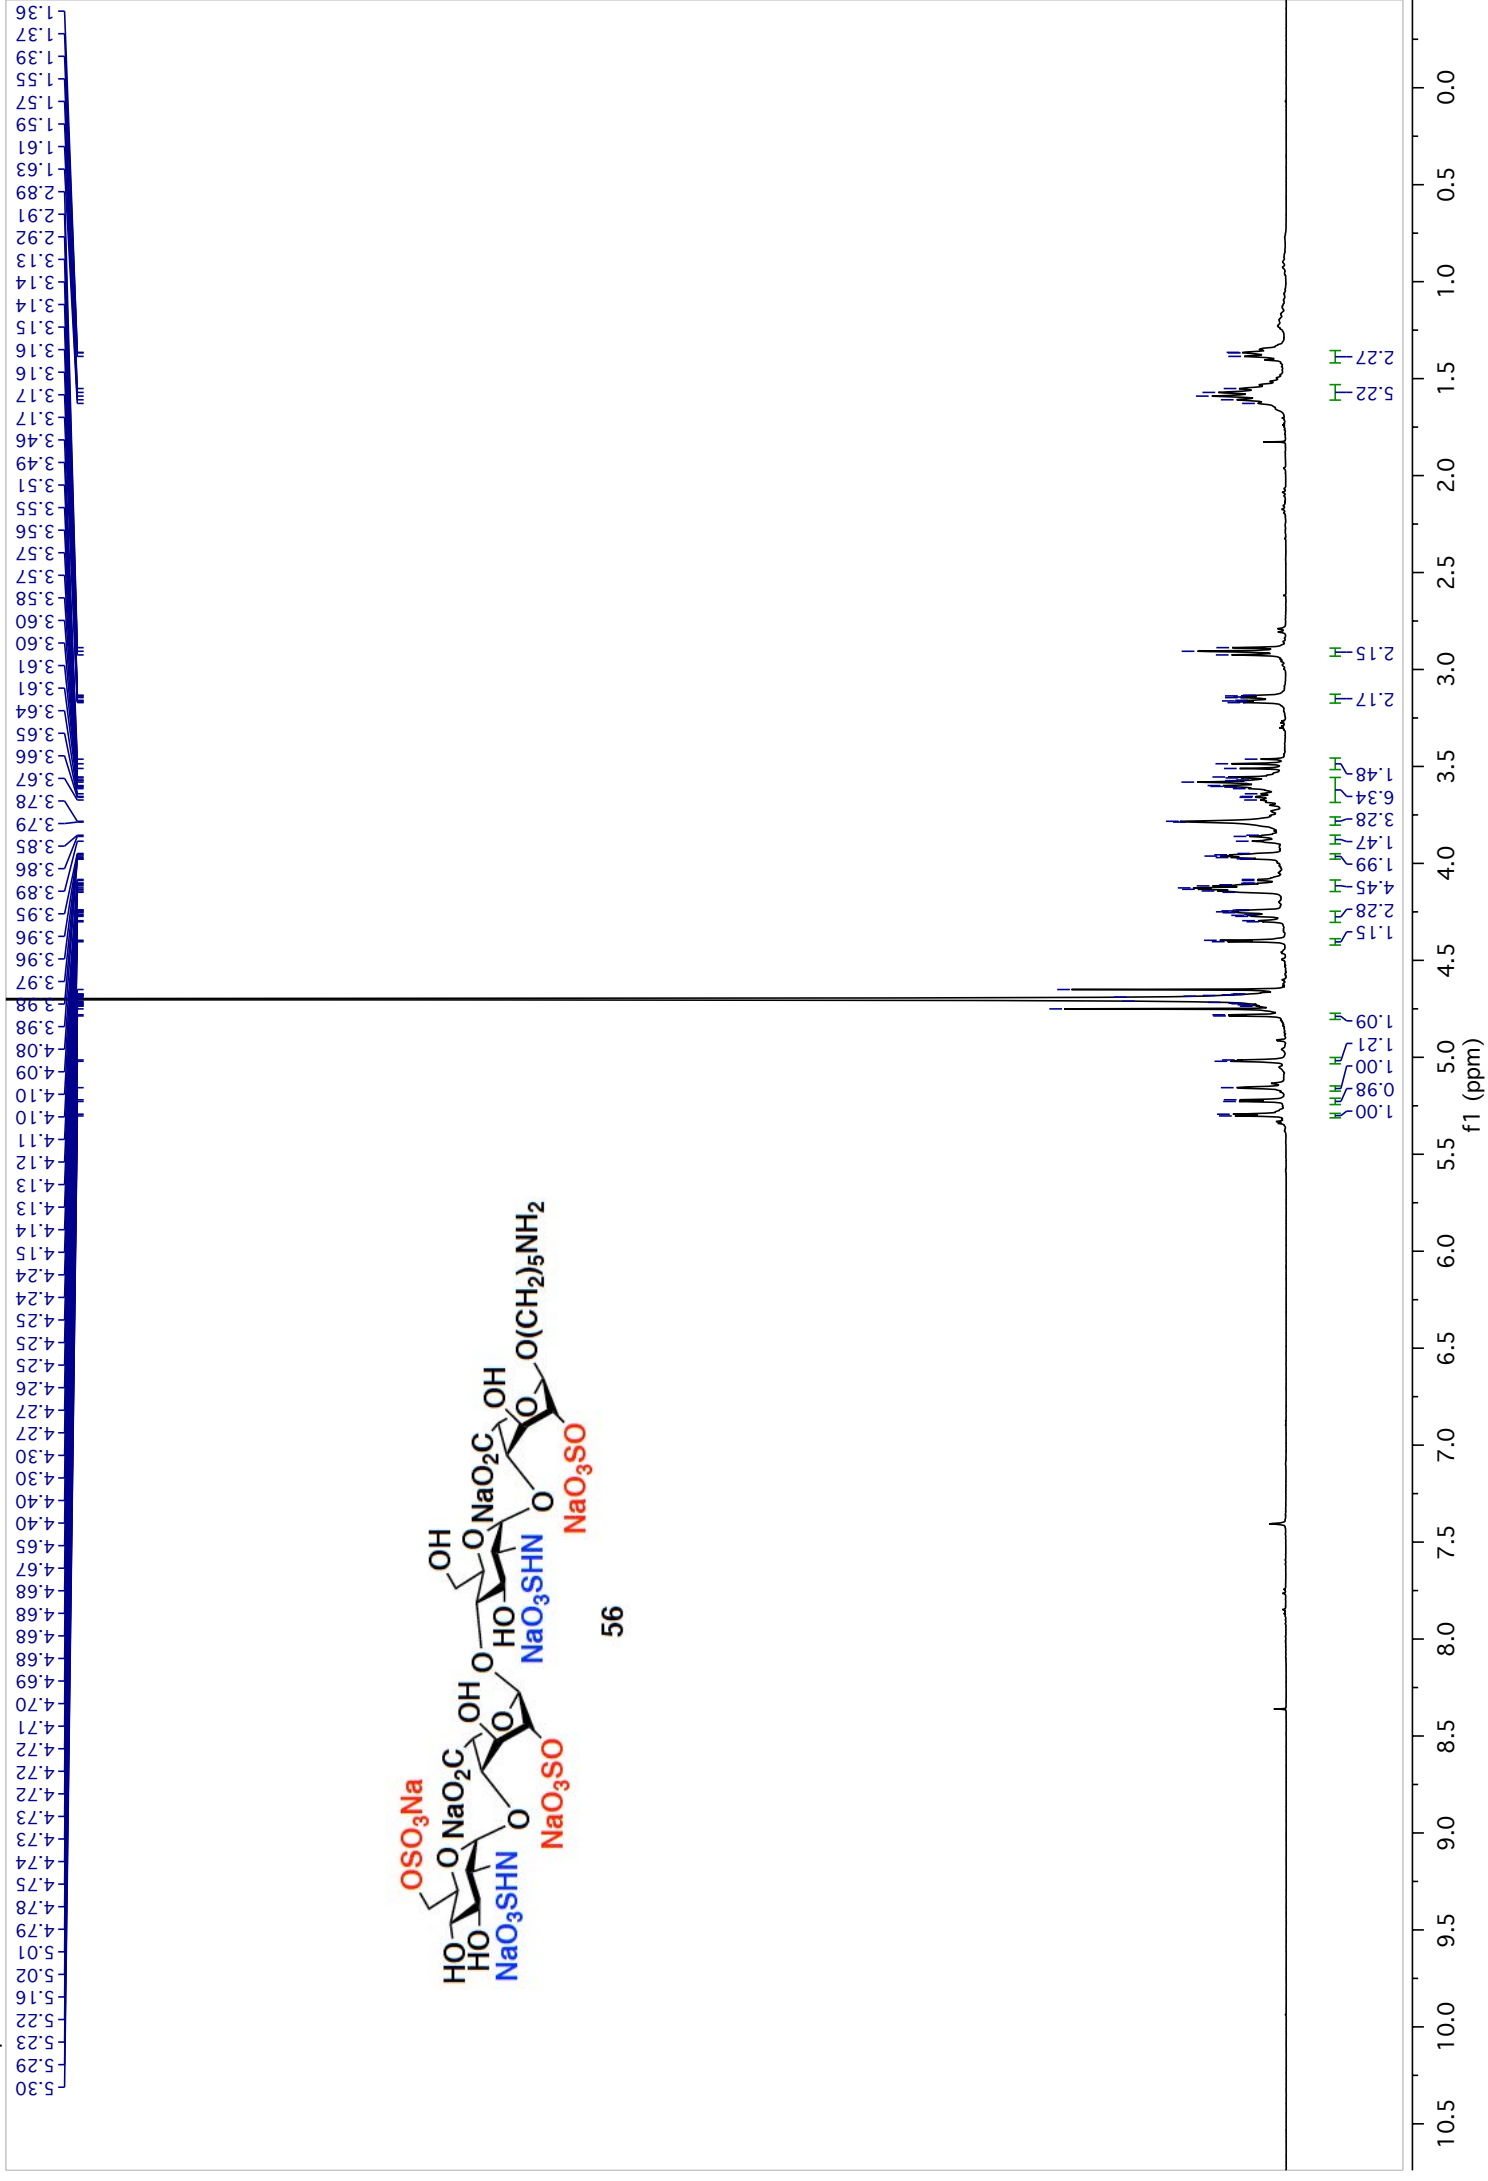

175.27  
174.72

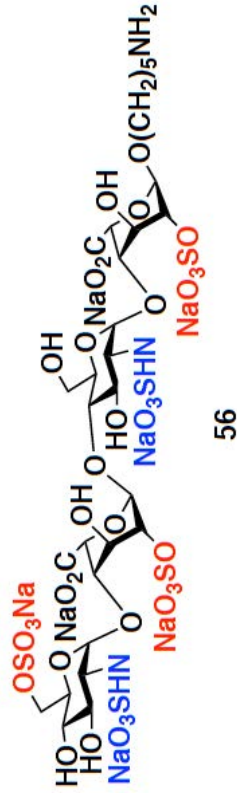

99.02  
98.94  
97.31  
96.66  
77.18  
76.48  
75.81  
75.55  
74.48  
71.07  
70.90  
69.91  
69.47  
69.09  
69.00  
68.78  
68.08  
68.04  
67.56  
66.33  
59.72  
58.23  
57.98

27.82  
26.16  
22.17

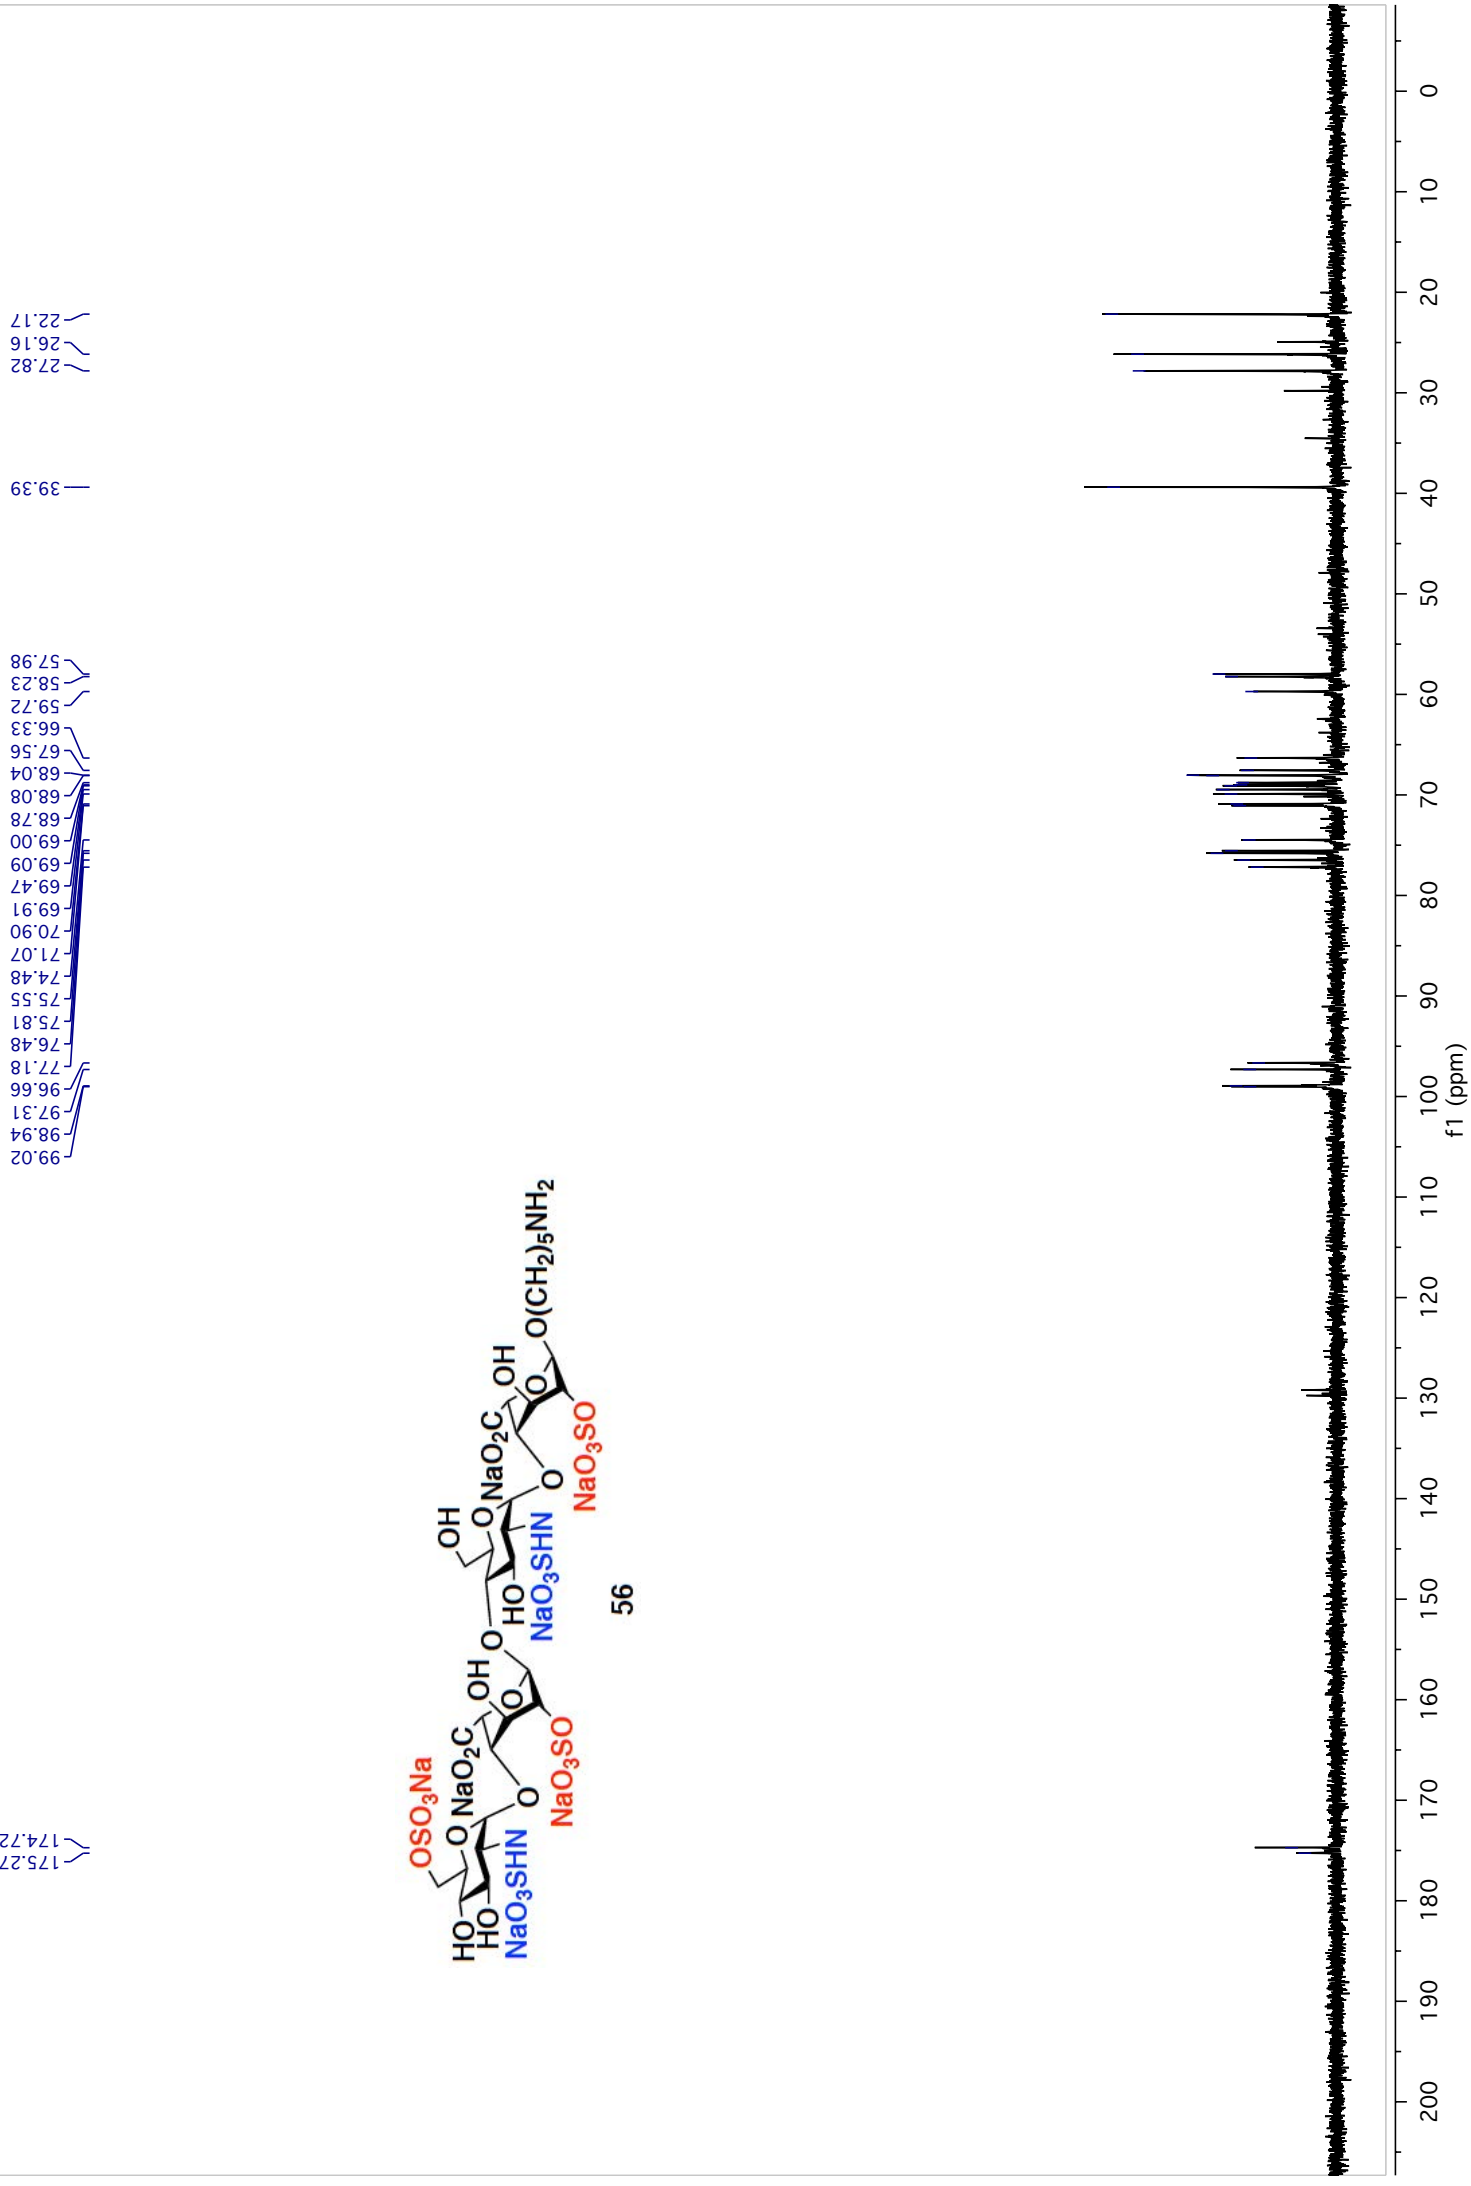

WL-2-230-D-6S-NAC-C-2S-B-6S-NAC-prod-H-TC.1.1r —

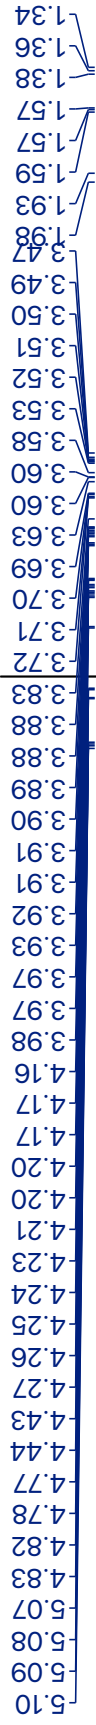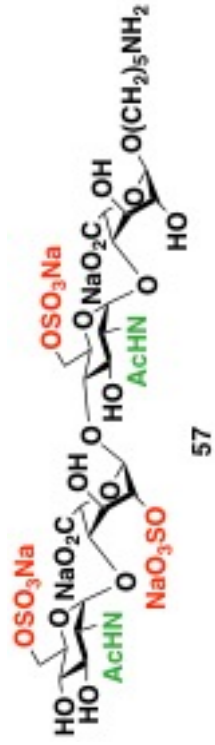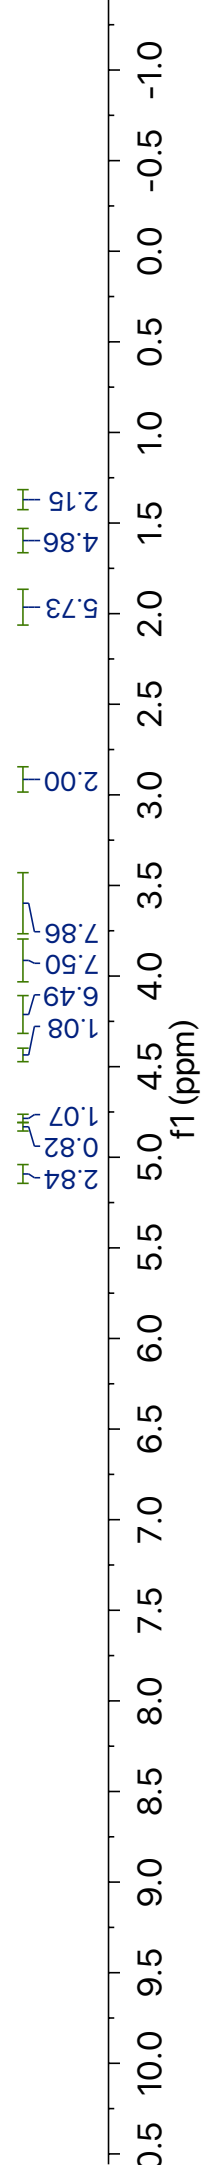

WL-2-D-6S-NAc-C-2S-B-6S-NAc-prod-C-TC.1.1.1r —

175.40  
174.90  
174.77  
174.30

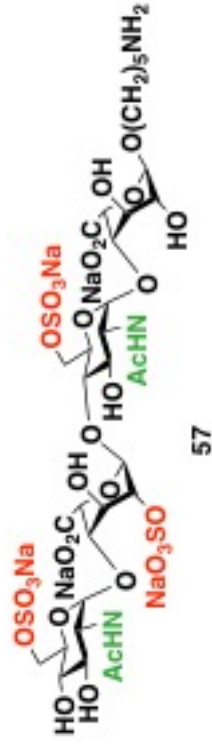

100.79  
99.09  
94.37  
93.64  
76.10  
73.96  
73.88  
71.19  
70.94  
70.04  
69.73  
69.51  
69.31  
69.15  
68.96  
68.76  
68.09  
67.84  
66.48  
66.38  
64.11  
53.58  
53.21  
39.38  
28.04  
26.22  
22.25  
22.22  
22.20  
21.91

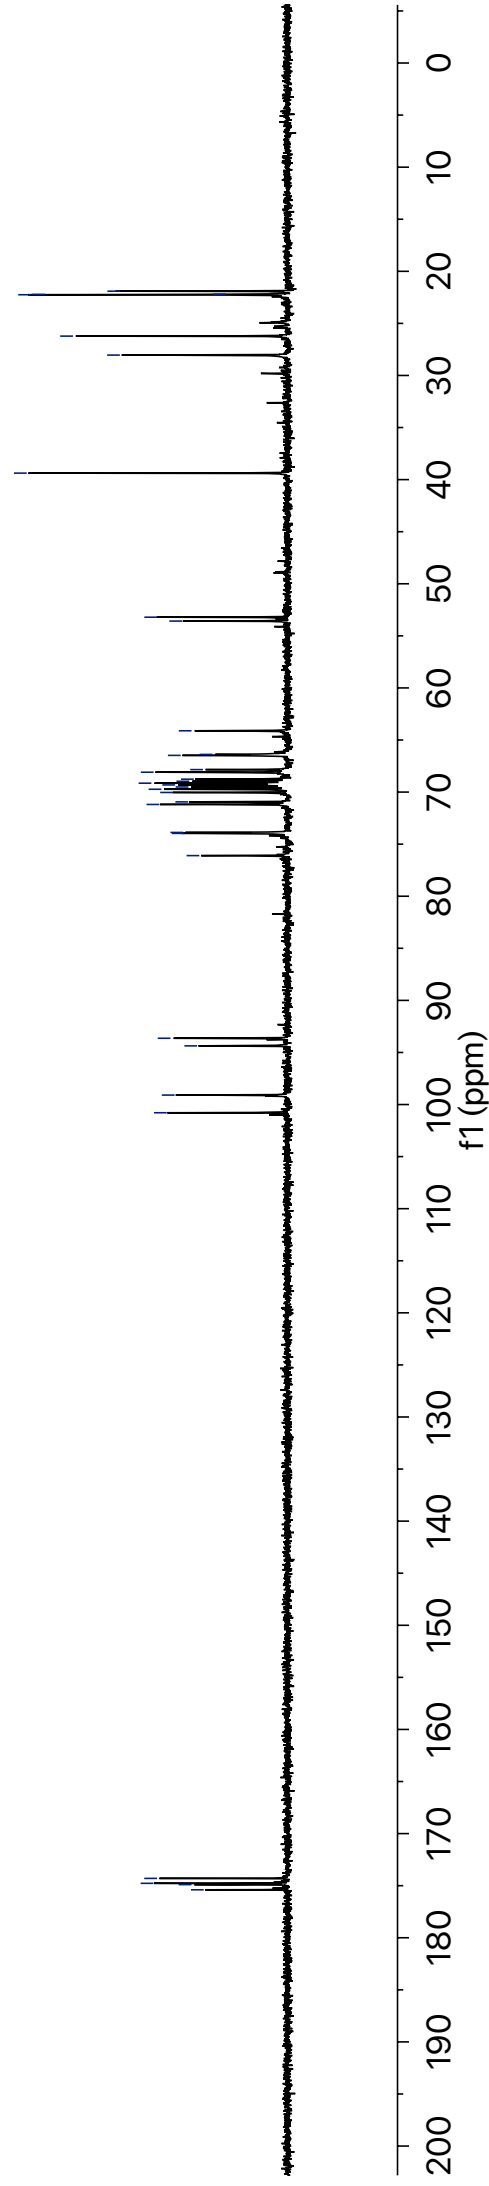



175.48  
175.09  
174.78

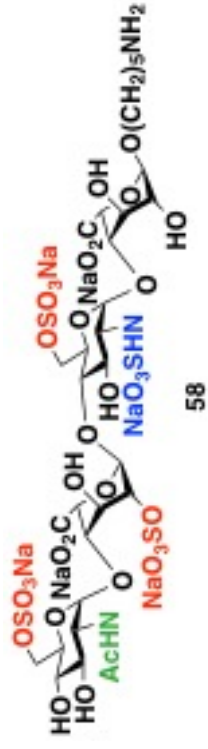

100.73  
98.97  
95.46  
93.57  
76.13  
74.87  
73.83  
71.19  
70.84  
70.02  
69.73  
69.24  
69.12  
69.05  
68.68  
68.50  
68.00  
67.81  
66.42  
63.98  
57.81  
53.21  
39.37

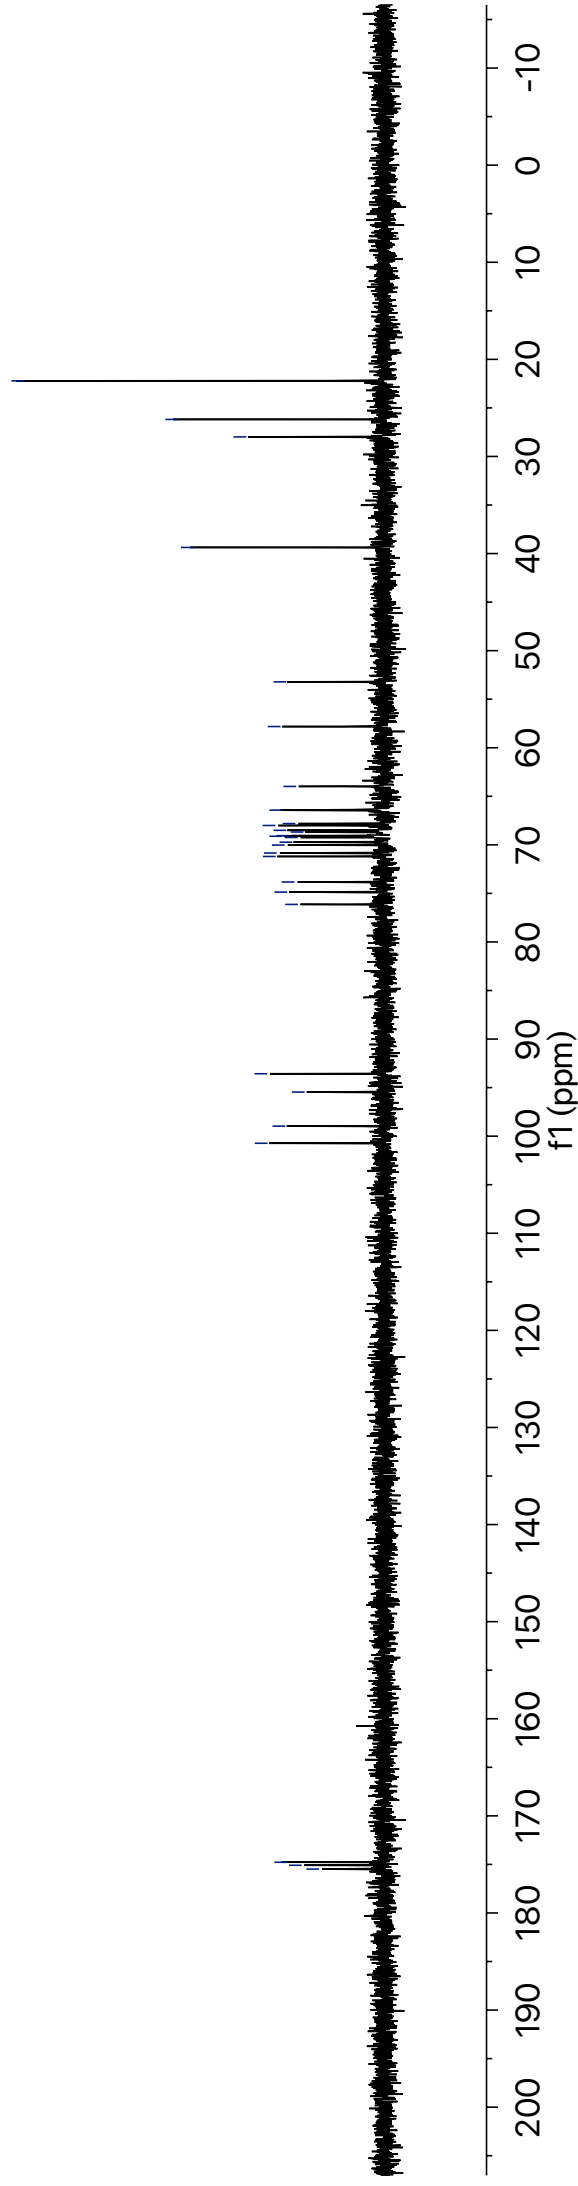

WL-2-226-D-6S-NS-C-2S-B-6S-NAC-Prod-H-TC.8.1.1r —

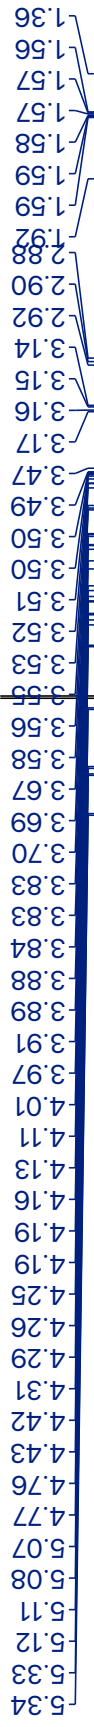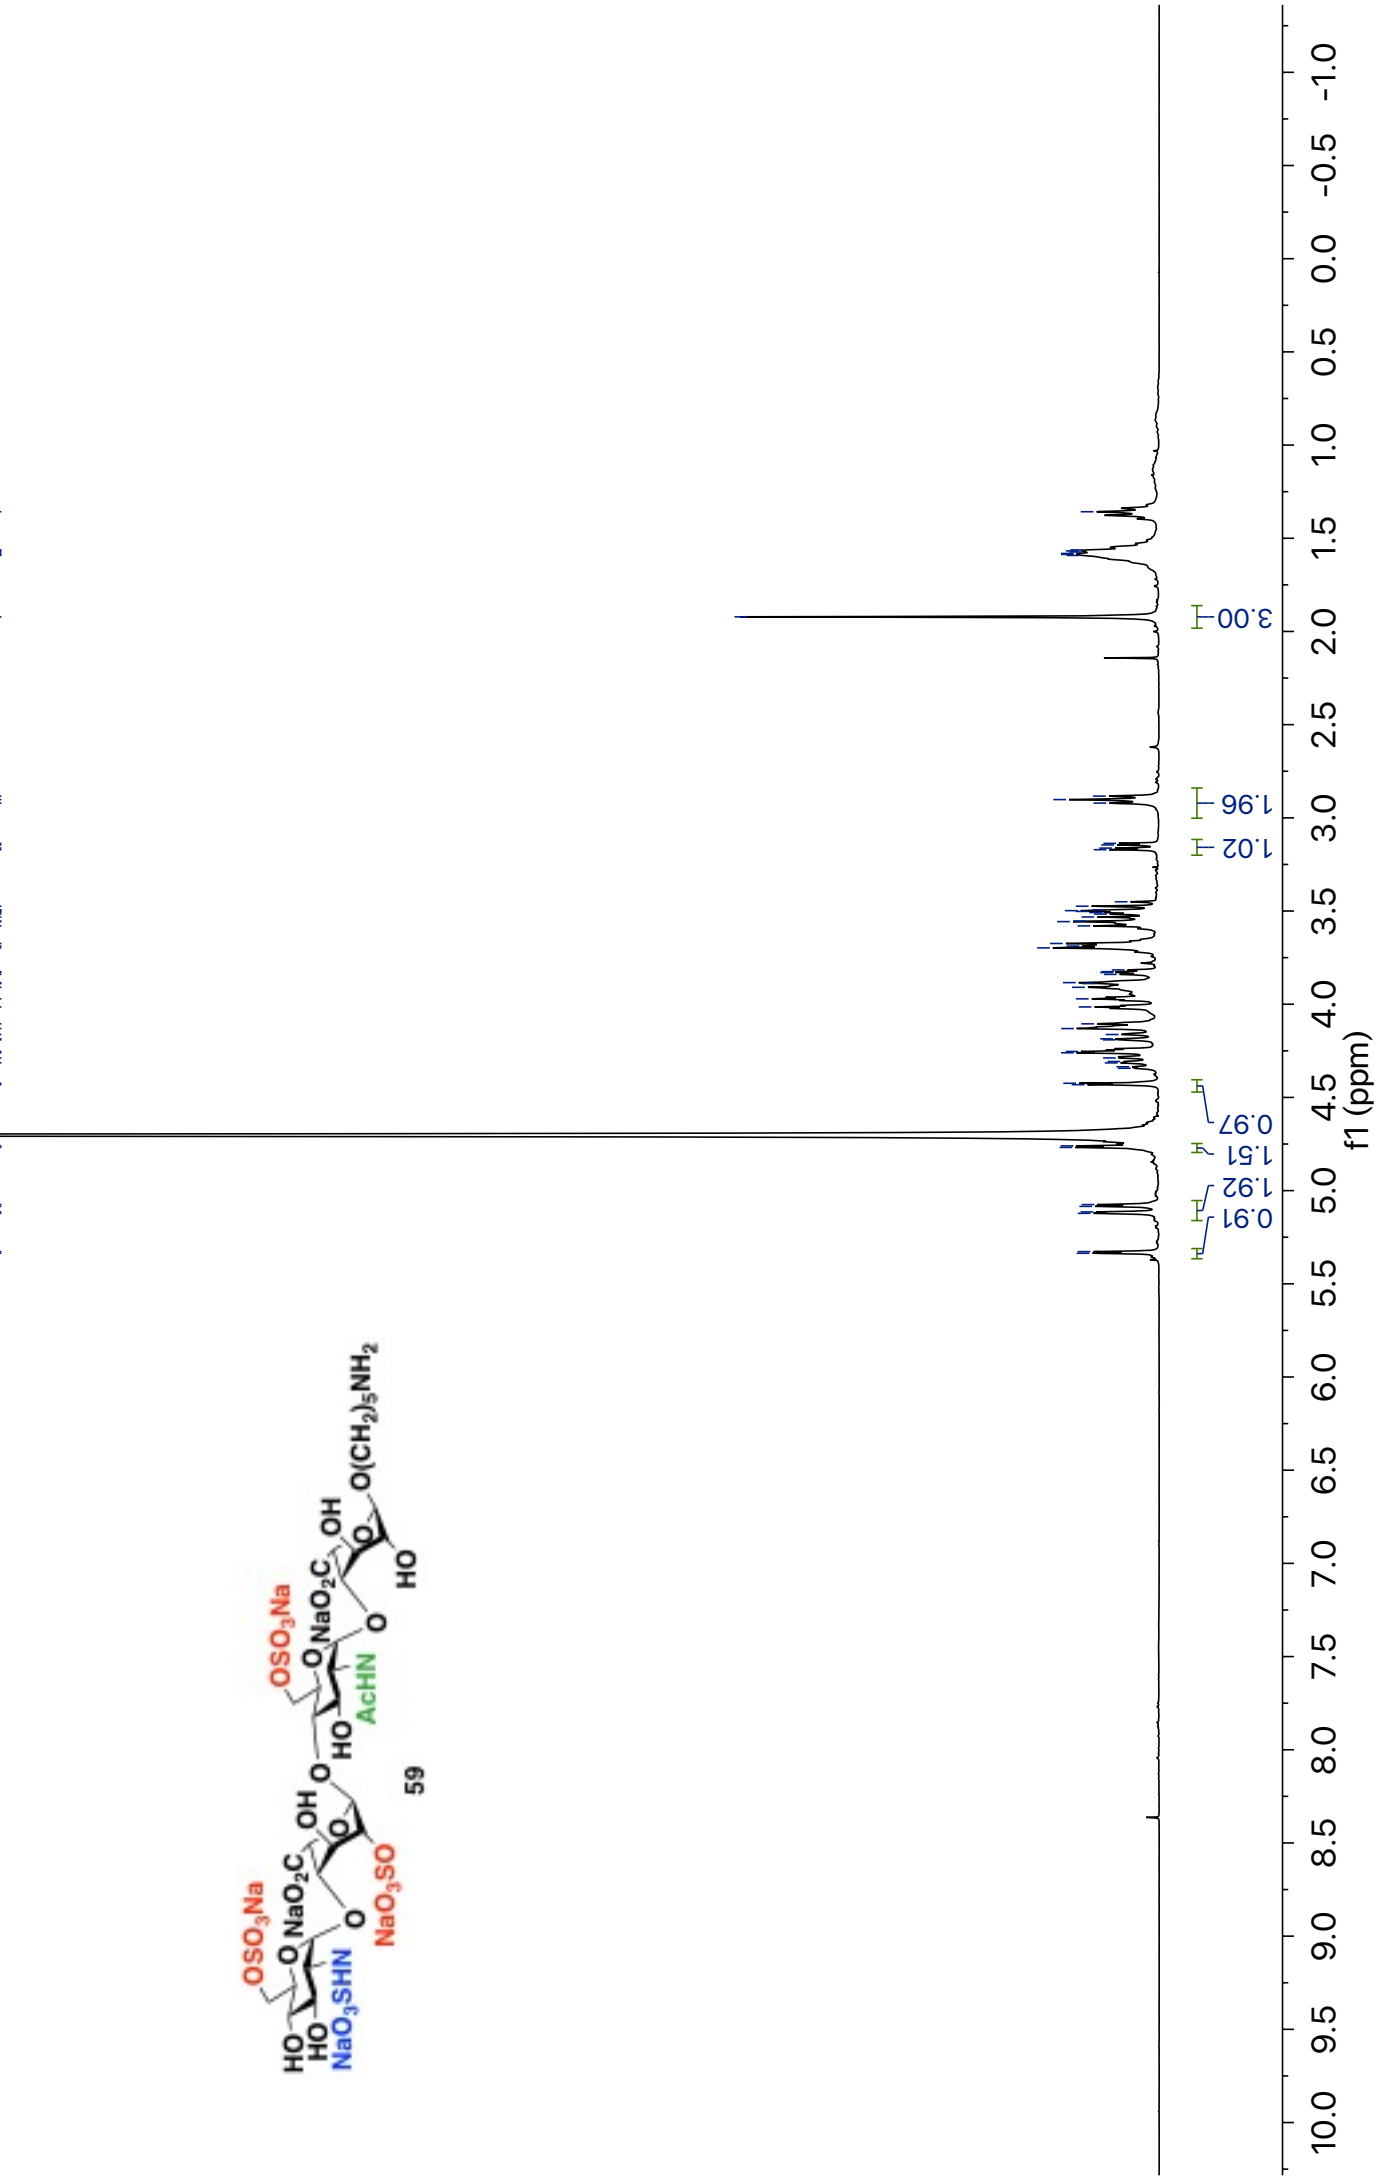



WL-2-226-D-6S-NS-C-2S-B-6S-NAc-Prod-C-TC.7.1.1r

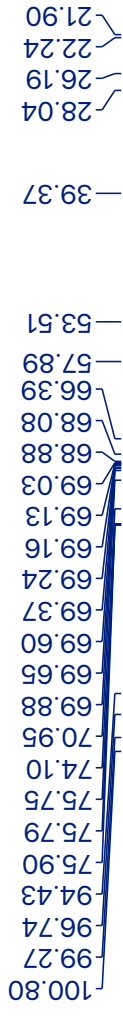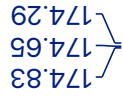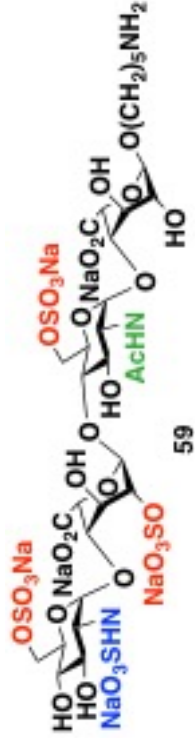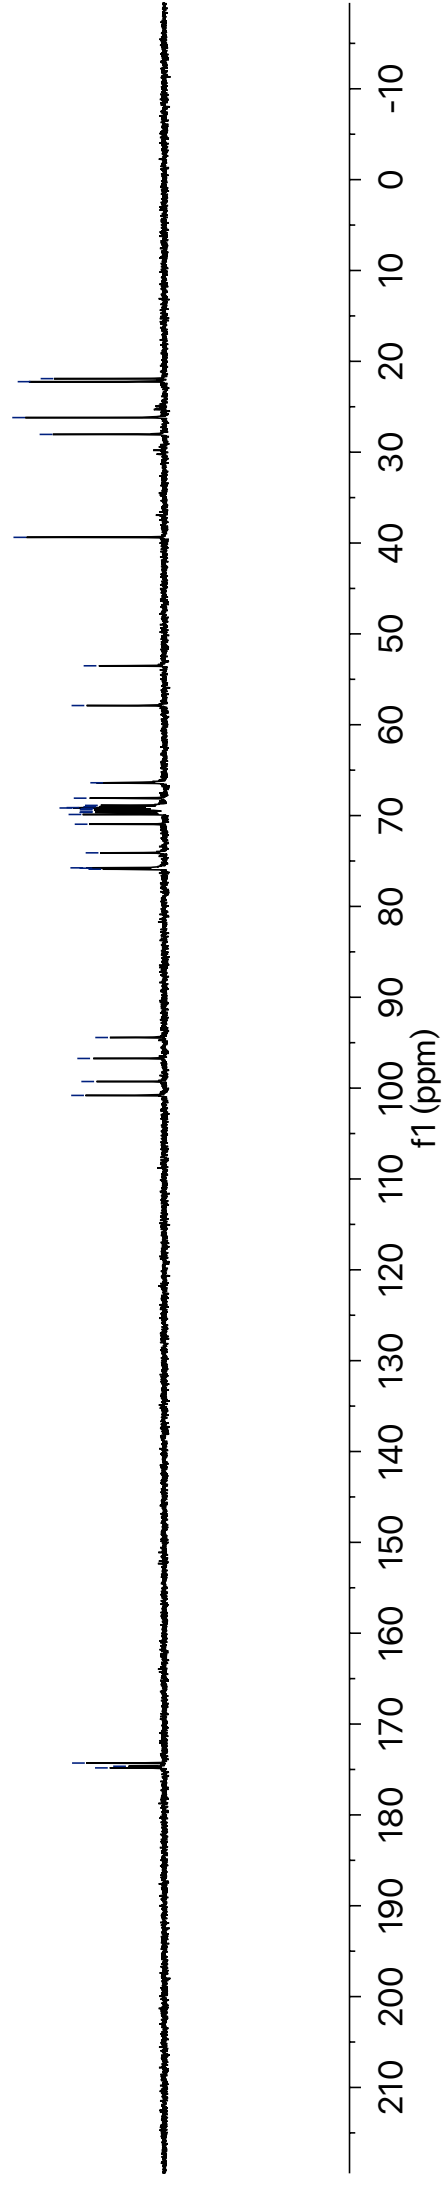

WL-2-100-prod-D-6SO3-NSO3-C-2SO3-B-6SO3-NSO3-H.2.1.1r —

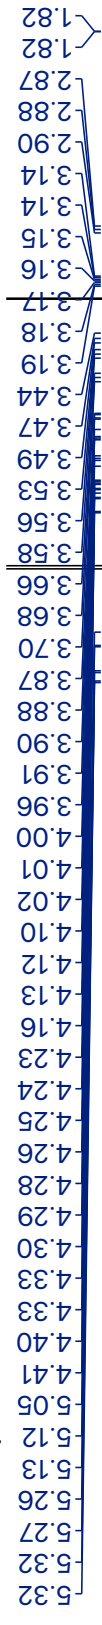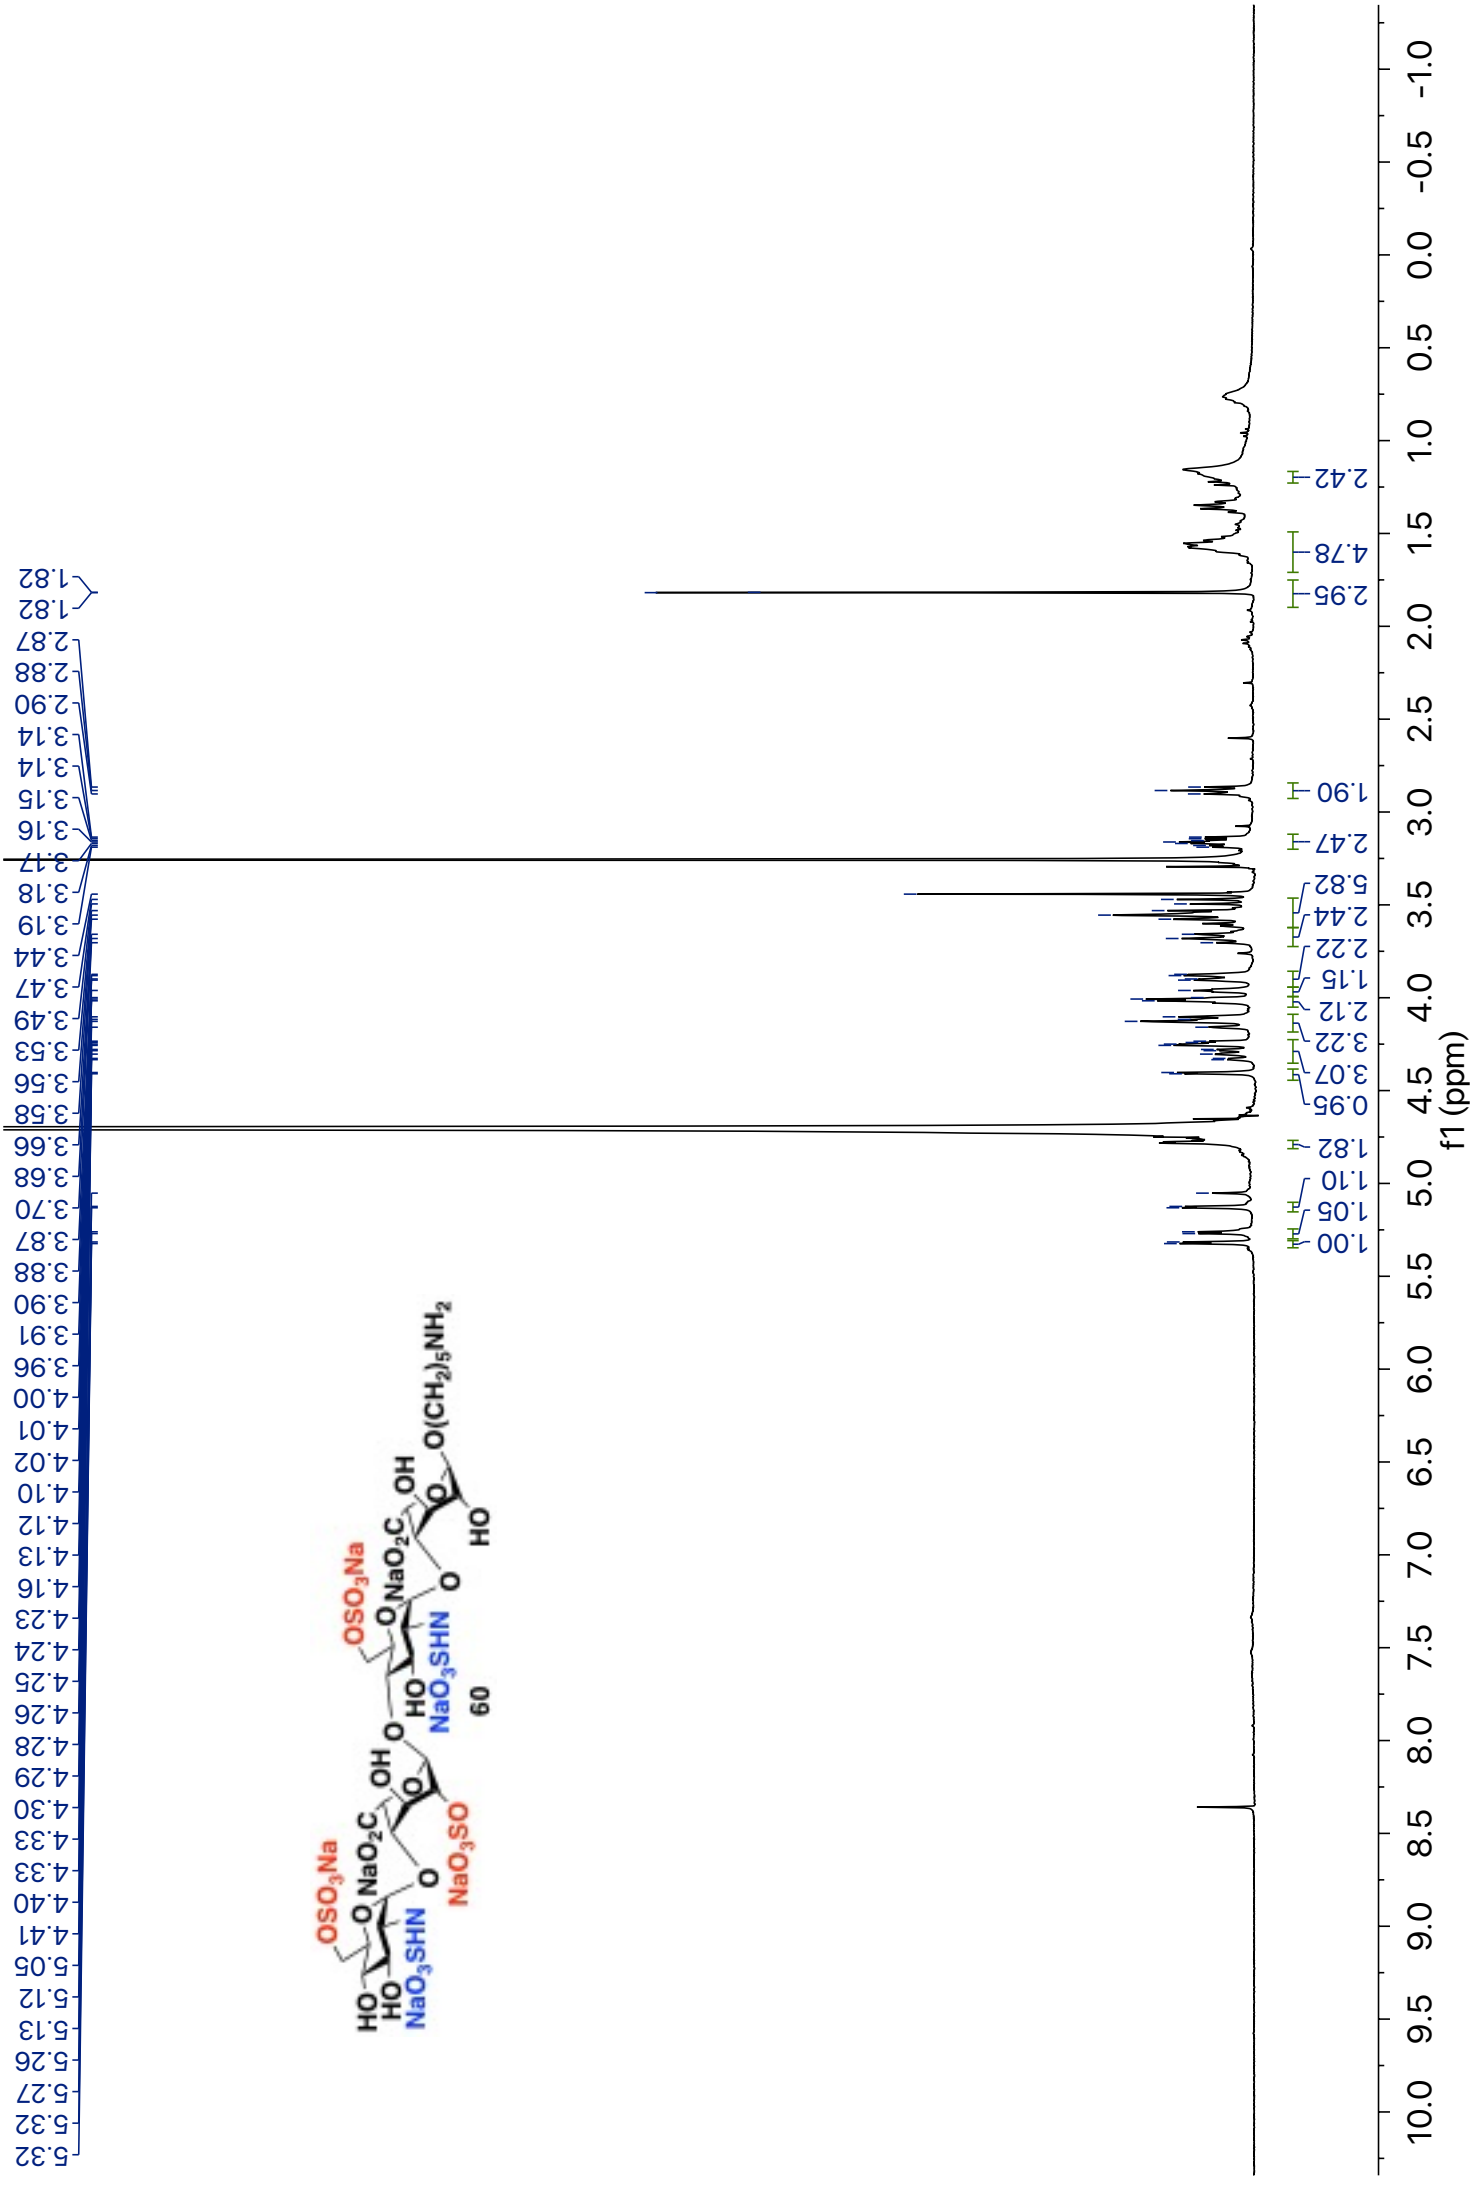

WL-2-100-D-6SO3-NSO3-C-2SO3-B-6SO3-NSO3-C.1.1.1r

100.71  
99.15  
96.75  
95.52  
75.69  
74.85  
70.94  
69.87  
69.68  
69.16  
68.92  
68.49  
68.28  
68.06  
66.41  
57.86  
57.73  
48.84  
39.38  
27.99  
26.34  
23.23  
22.25

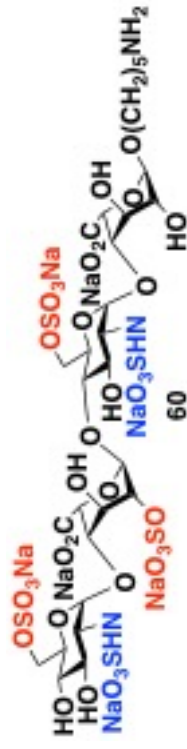

175.11  
161.86

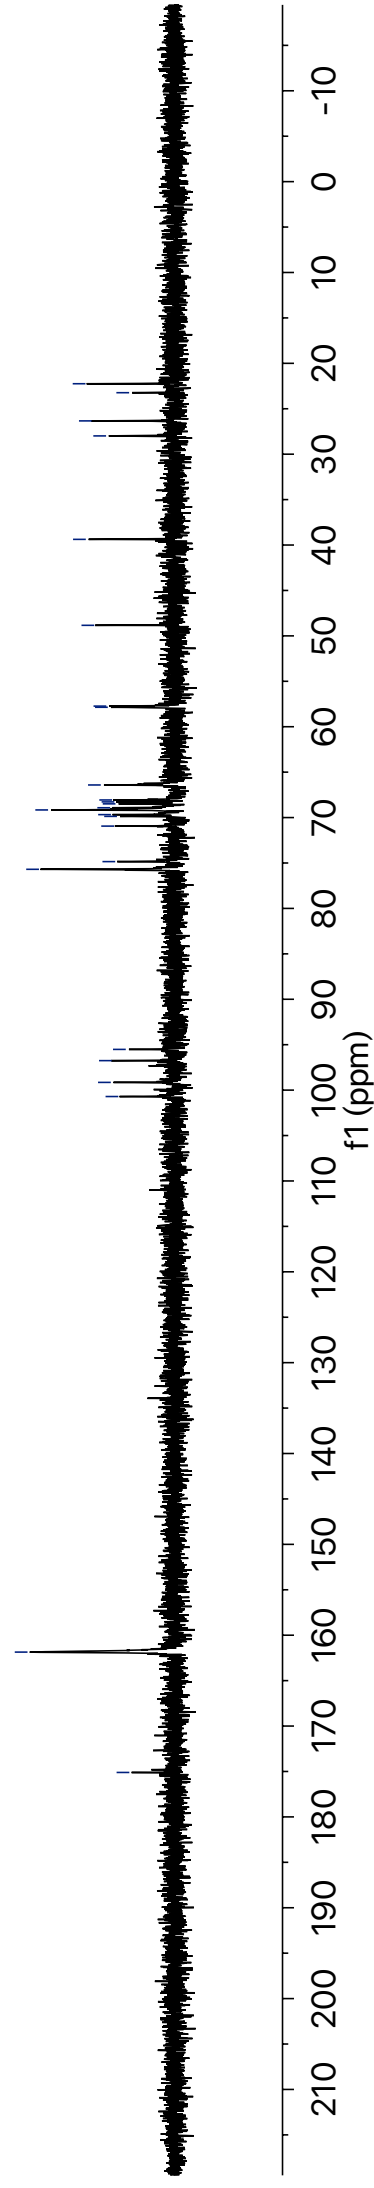

WL-2-196-D-NAC-6S-C-2S-B-NAC-6S-A-2S-H-TC.1.1.r —

5.09  
5.07  
5.06  
5.04  
5.03  
4.83  
4.83  
4.48  
4.48  
4.26  
4.23  
4.22  
4.21  
4.20  
4.19  
4.18  
4.14  
4.13  
3.97  
3.96  
3.95  
3.91  
3.90  
3.88  
3.70  
3.69  
3.68  
3.66  
3.61  
3.58  
3.56  
3.50  
3.47  
3.45  
2.94  
2.92  
2.90  
1.98  
1.97  
1.61  
1.60  
1.58  
1.40  
1.39  
1.38  
1.37

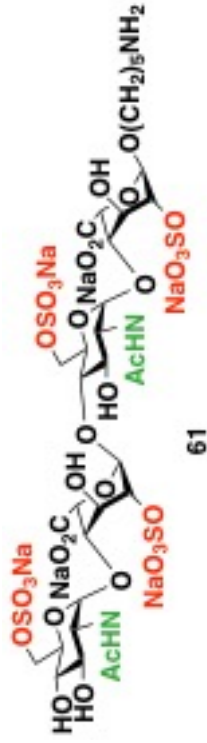

61

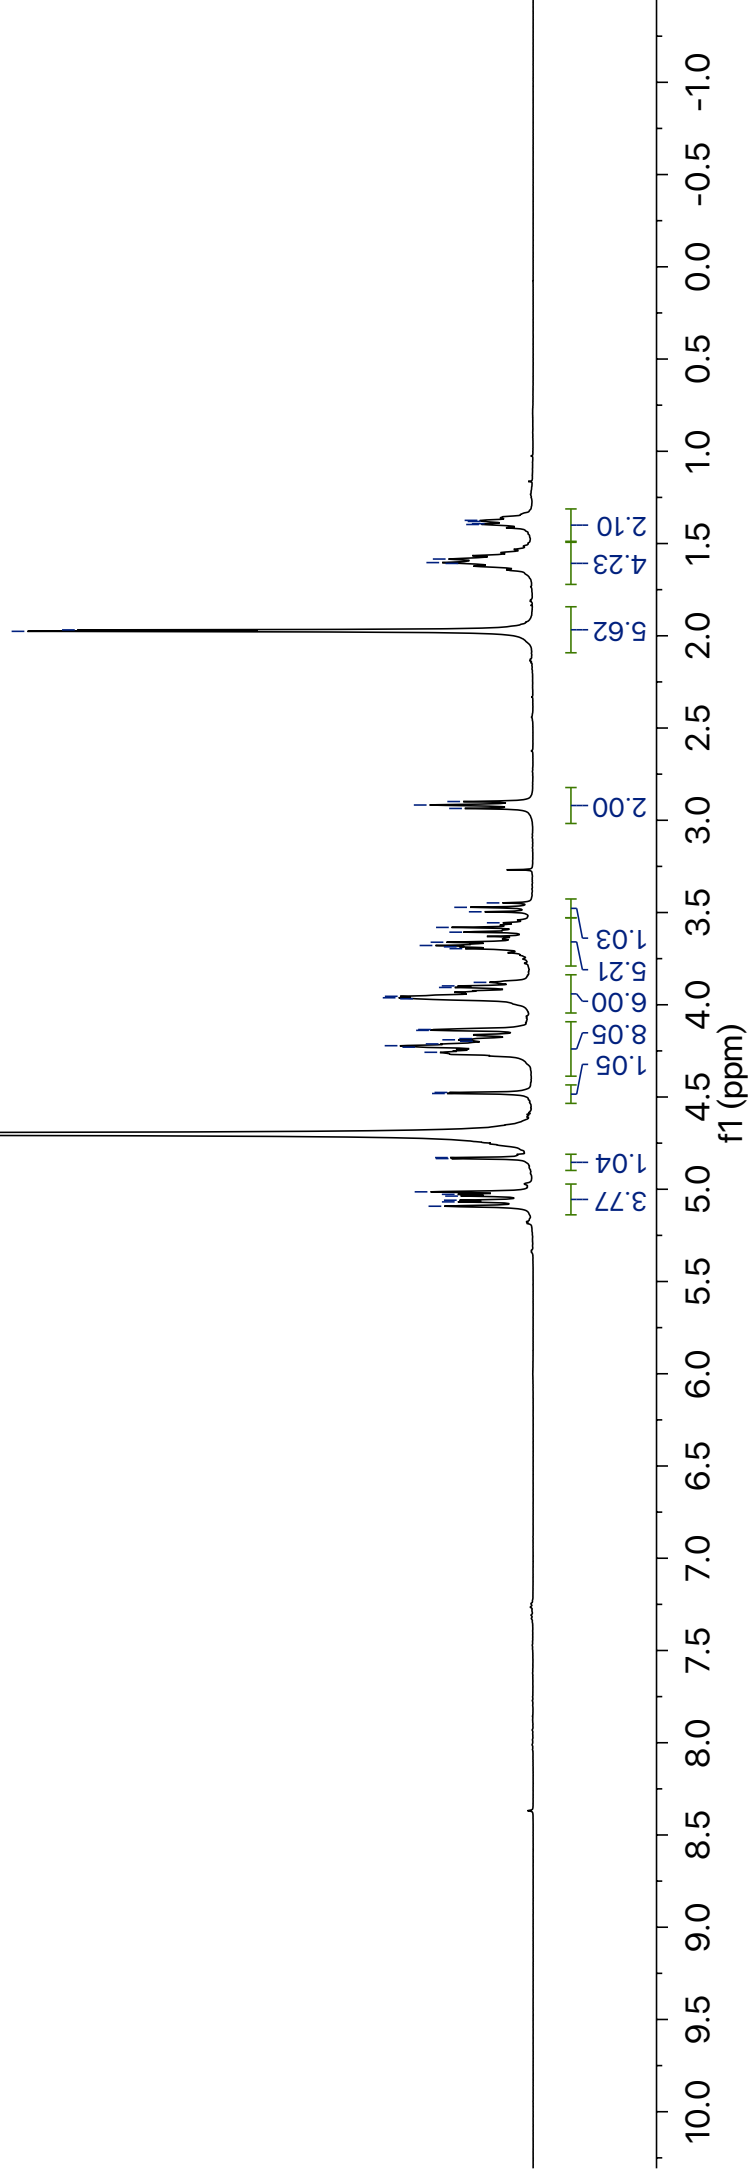

WL-2-196-D-NAC-6S-C-2S-B-NAC-6S-A-2S-C-TC.7.1.1r —

175.48  
175.20  
174.79  
174.73

99.17  
98.53  
93.64  
93.36  
76.35  
73.91  
73.66  
71.19  
70.83  
70.75  
70.03  
69.99  
69.26  
69.13  
68.11  
67.73  
67.00  
66.46  
63.89  
63.74  
53.42  
53.21  
39.39  
27.81  
26.24  
22.29  
22.23  
22.20

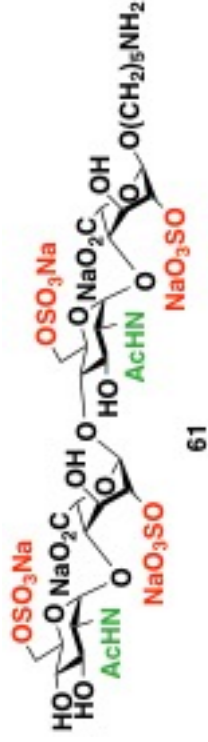

61

200 190 180 170 160 150 140 130 120 110 100 90 80 70 60 50 40 30 20 10 0 -10

f1 (ppm)

WL-2-197-D-NAC-6S-C-2S-B-NS-6S-A-2S-H-TC.1.1r —

5.29 5.29 5.11 5.07 5.06 5.04 5.04 4.87 4.87 4.42 4.41 4.25 4.24 4.23 4.22 4.21 4.20 4.20 4.17 4.16 4.14 4.14 4.13 4.12 3.99 3.98 3.98 3.97 3.96 3.94 3.93 3.93 3.92 3.90 3.89 3.88 3.72 3.70 3.69 3.68 3.67 3.67 3.66 3.66 3.64 3.63 3.61 3.61 3.60 3.59 3.58 3.57 3.49 3.47 3.45 3.21 3.20 3.18 3.17 2.92 2.90 2.88 1.97 1.59 1.57 1.39 1.37

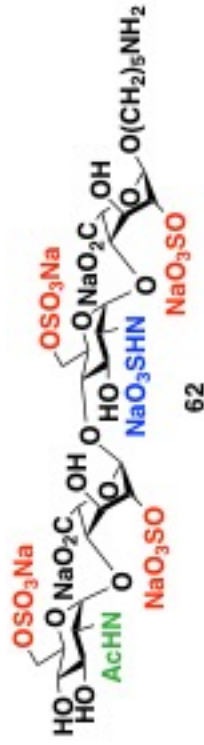

0.88 2.87 0.86 0.93 7.93 5.04 5.12 1.07 0.89 2.00 2.95 4.08 2.05

10.0 9.5 9.0 8.5 8.0 7.5 7.0 6.5 6.0 5.5 5.0 4.5 4.0 3.5 3.0 2.5 2.0 1.5 1.0 0.5 0.0 -0.5 -1.0

f1 (ppm)

WL-2-197-D-NAC-6S-C-2S-B-NS-6S-A-2S-C-TC.7.1.1r

175.50  
174.76  
174.70

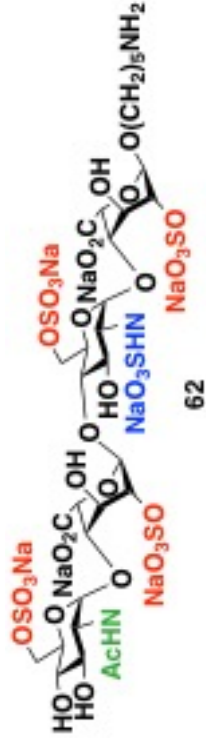

98.93  
98.80  
96.66  
93.61  
76.05  
75.68  
73.73  
71.16  
70.89  
70.00  
69.55  
69.11  
68.60  
68.46  
68.05  
67.75  
66.43  
66.35  
63.97  
57.96  
53.18  
39.39  
27.81  
26.26  
22.20

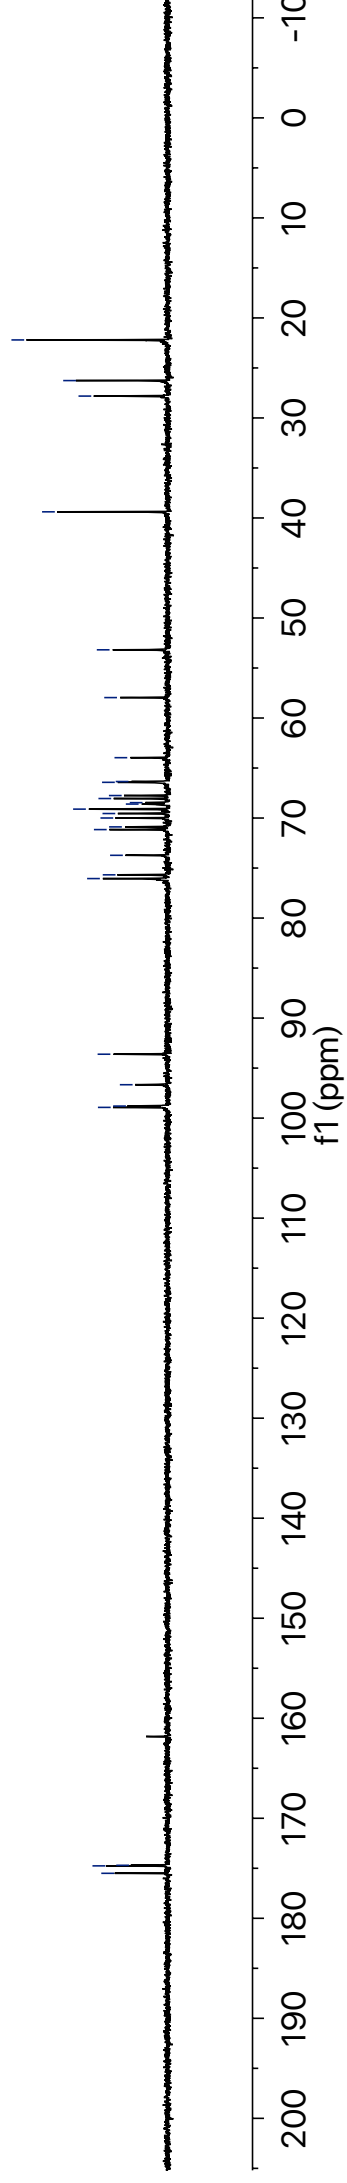

WL-2-314-D-NS-C-2S-B-Nac-6S-A-2S-H-TC.8.1.1r —

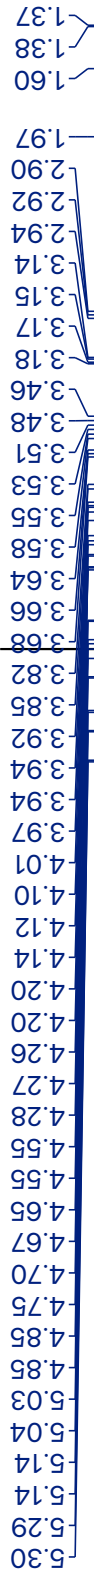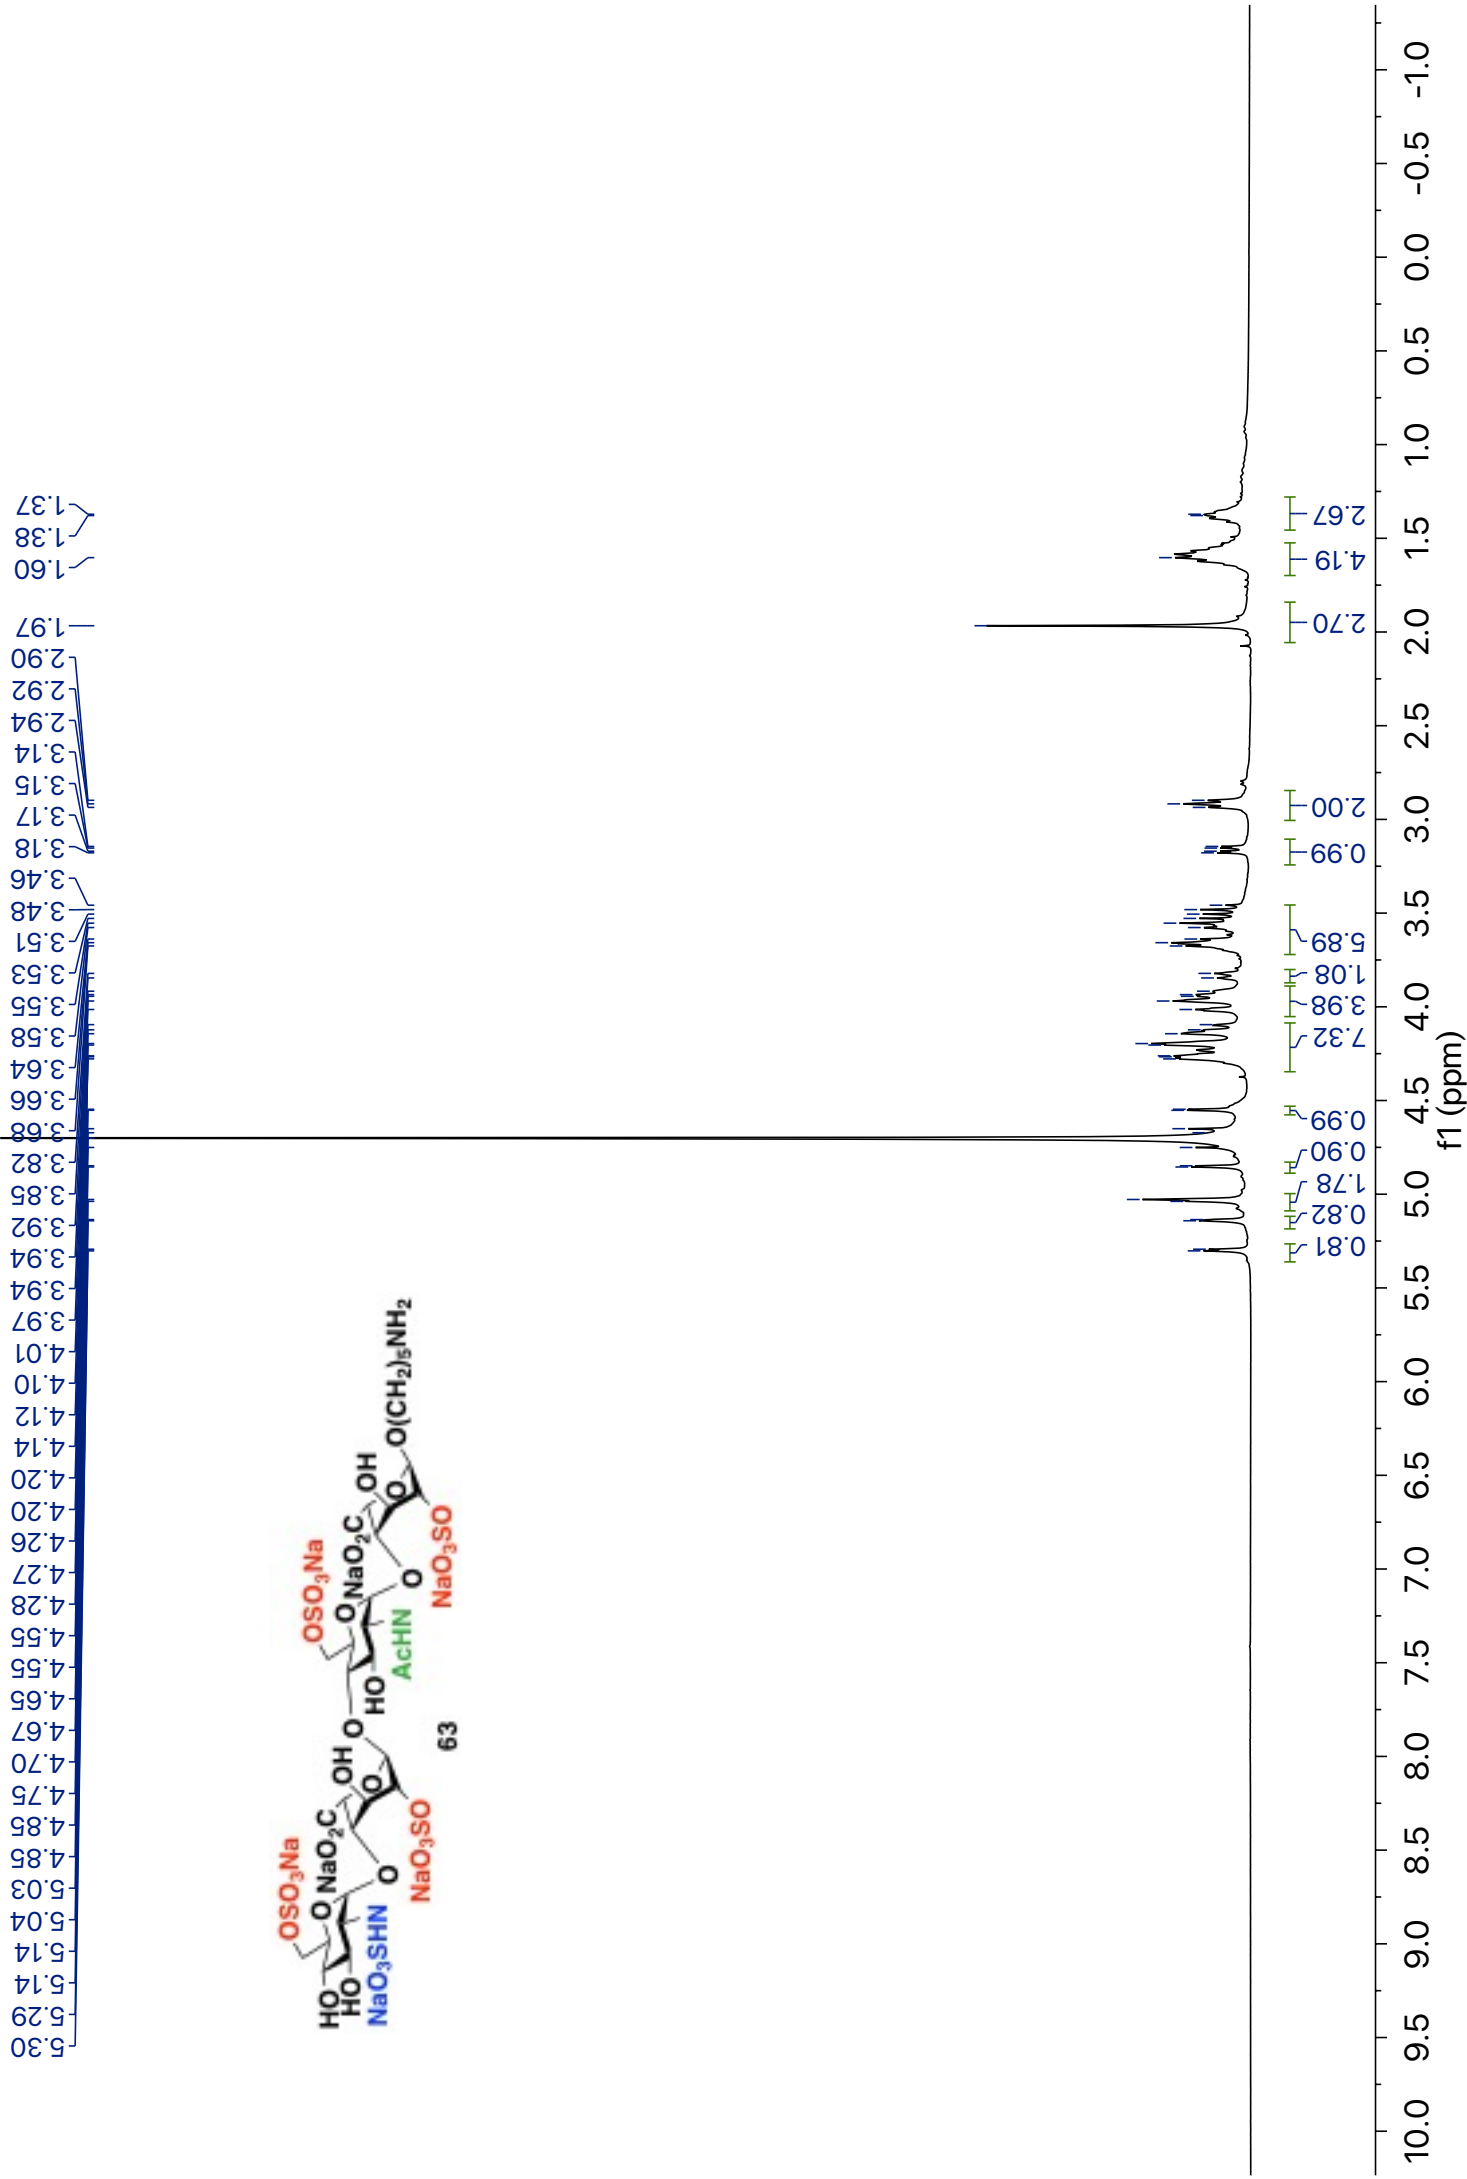



WL-2-314-D-NS-6S-C-2S-B-NAc-6S-A-2S-C-TC.7.1.1r —

174.75  
174.67  
174.03

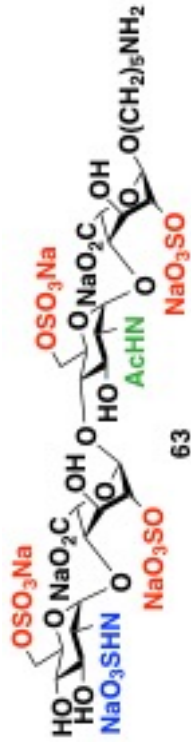

99.25  
98.54  
97.66  
93.51  
76.29  
76.12  
75.00  
73.79  
70.85  
70.82  
70.06  
69.89  
69.35  
69.11  
68.31  
68.22  
66.77  
66.44  
66.36  
63.62  
57.90  
53.33  
39.38  
27.78  
26.26  
22.28  
22.19

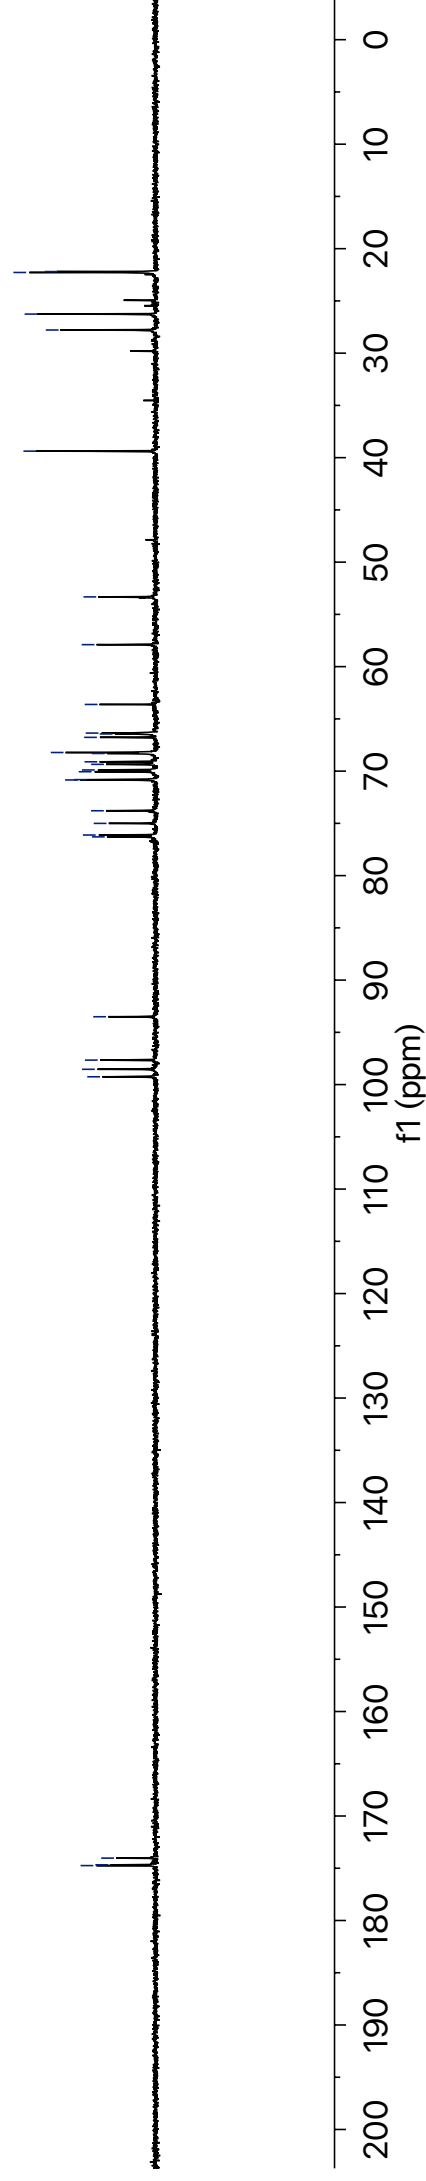

WL-2-306-D-NS-6S-C-2S-B-NS-6S-A-2S-TC.2.1.1r —

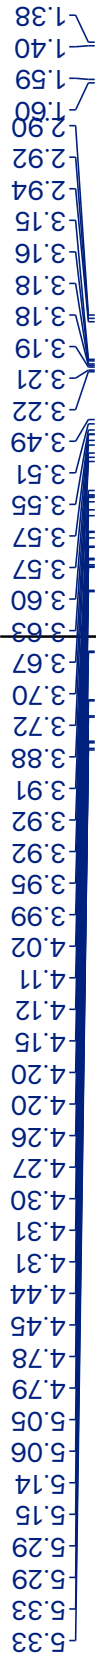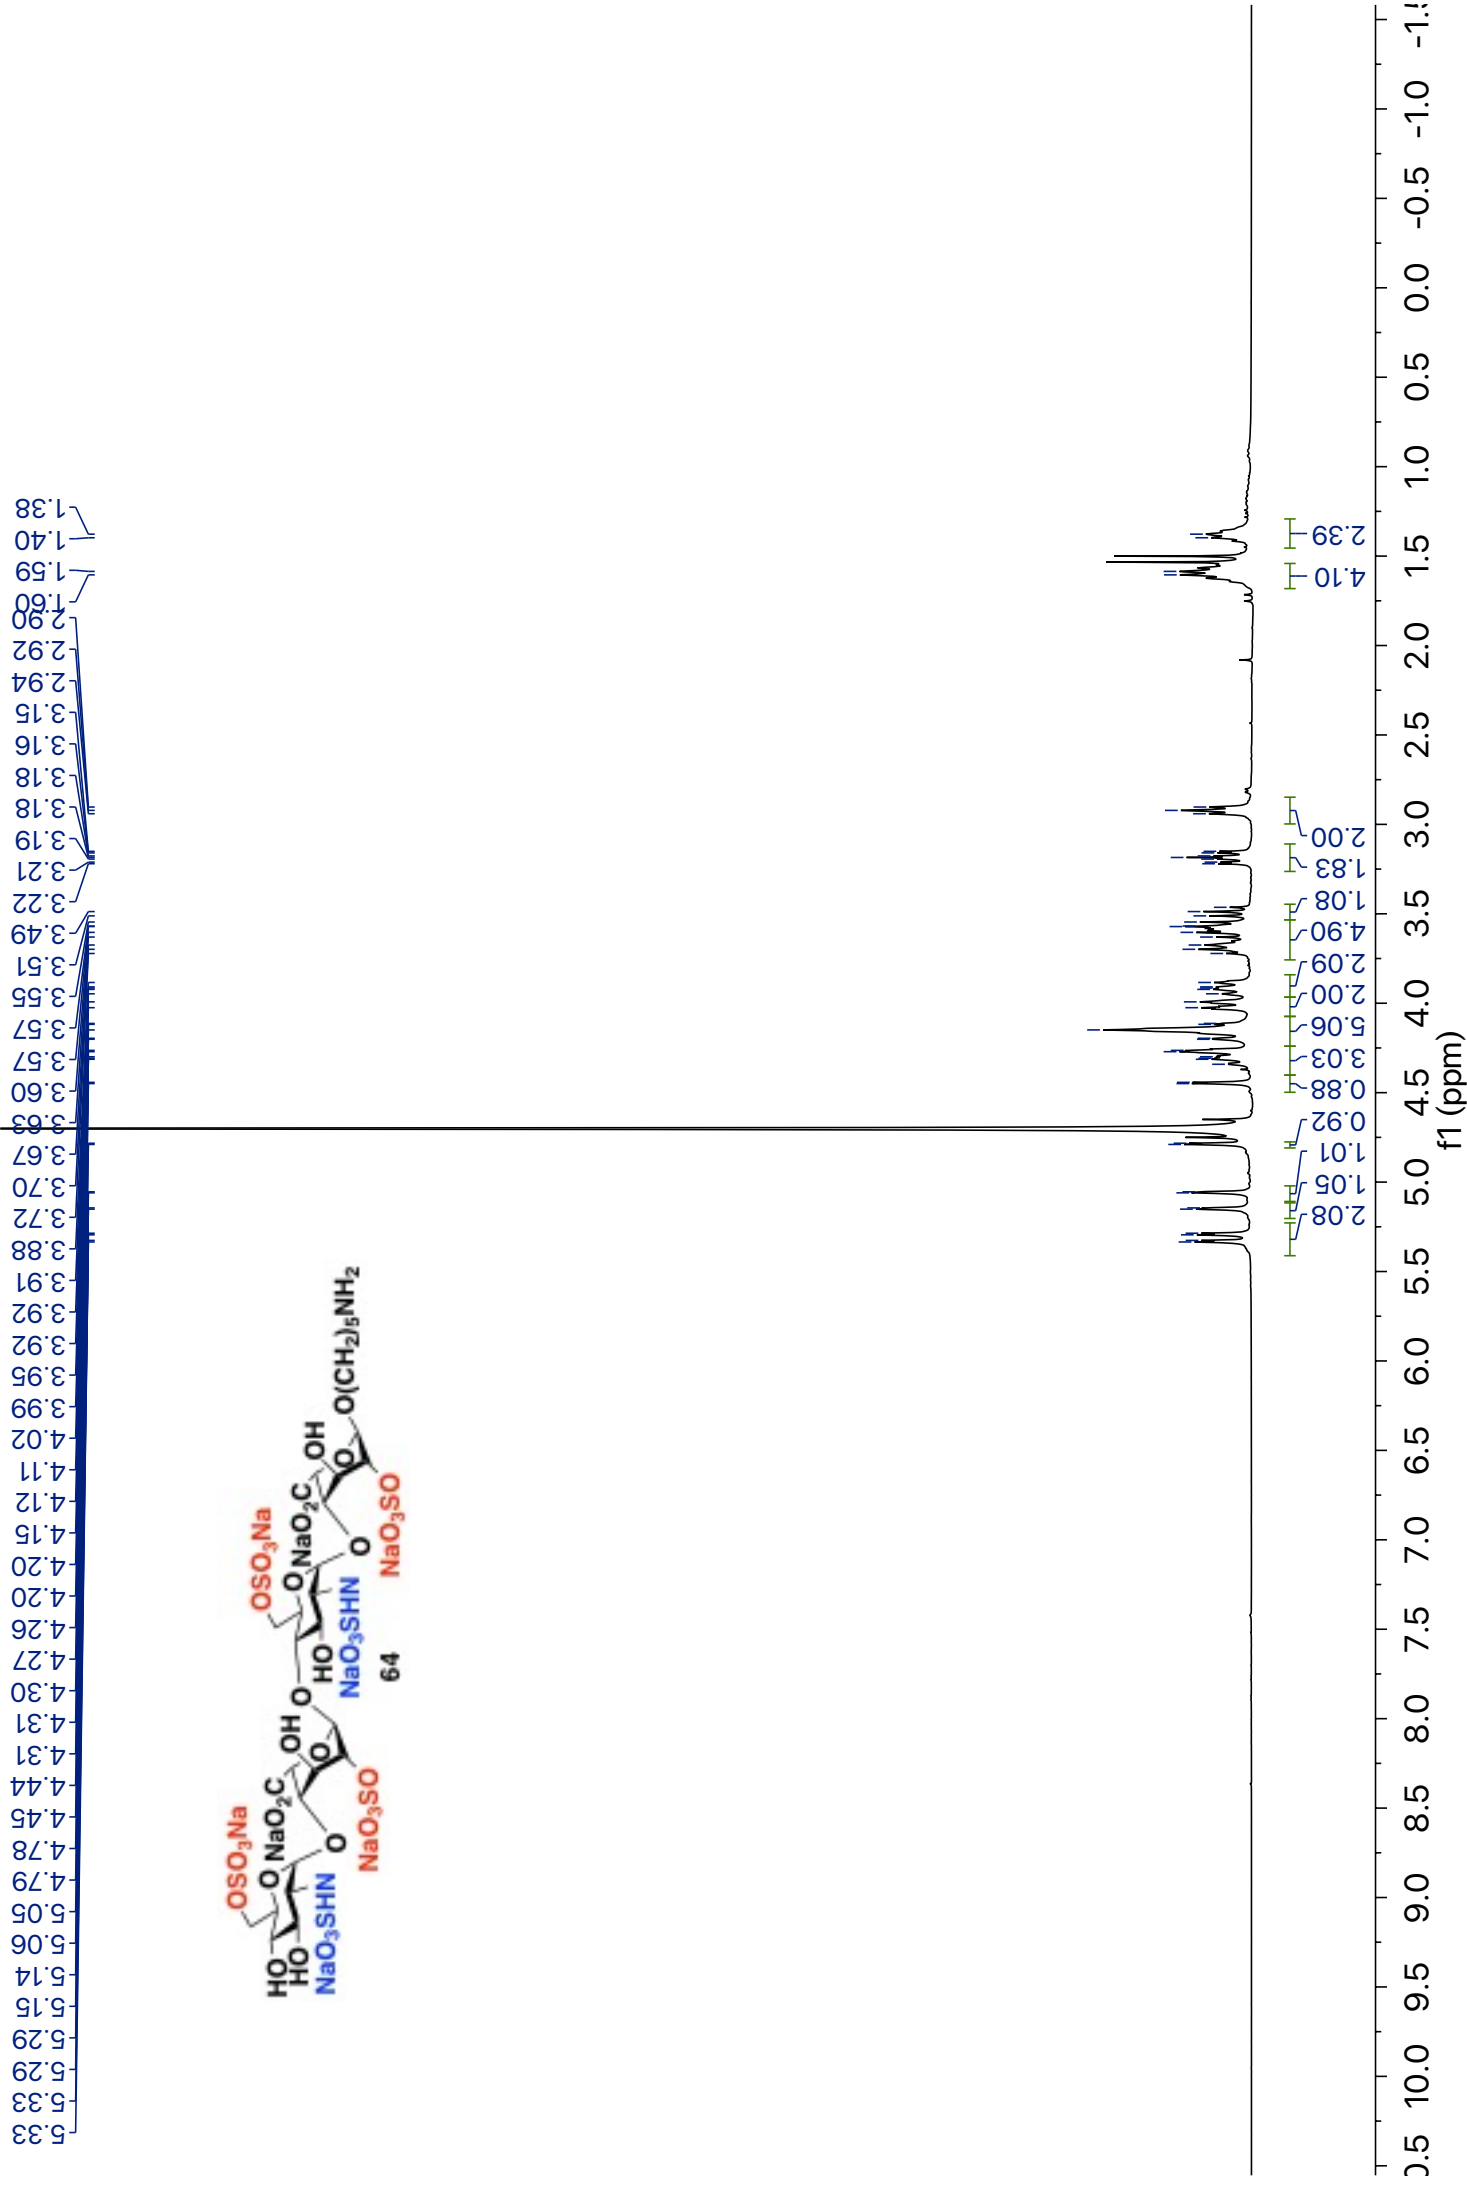

WL-2-306-D-NS-6S-C-2S-B-NS-6S-A-2S-TC.1.1.r

174.67  
174.60

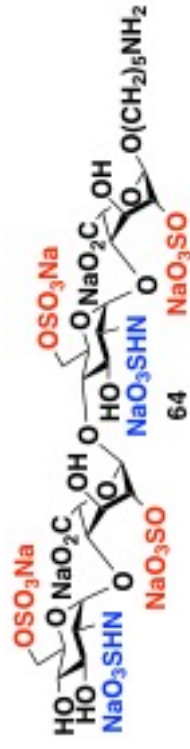

99.13  
98.79  
96.99  
96.87  
75.95  
75.85  
75.81  
75.58  
70.94  
69.93  
69.51  
69.22  
69.17  
69.00  
68.83  
68.50  
68.35  
68.13  
66.41  
66.34  
57.93  
57.89  
39.41  
27.84  
26.23  
22.23

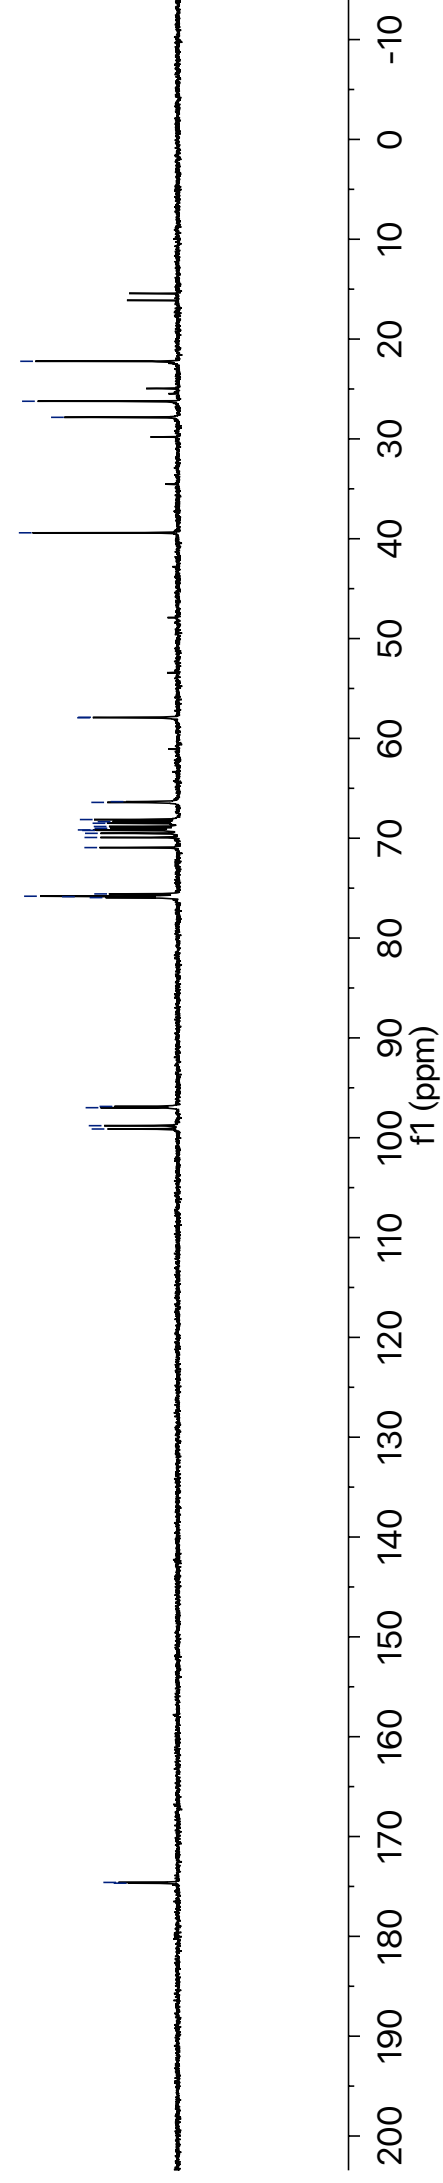

7.88  
7.87  
7.86  
7.85  
7.64  
7.64  
7.62  
7.62  
7.56  
7.42  
7.42  
7.41  
7.40  
7.39  
7.39  
7.37  
7.37  
7.35  
7.35  
7.34  
7.33  
7.33  
7.33  
7.31  
7.30  
7.29  
7.29  
7.28  
7.28  
7.27  
7.27  
7.26  
7.26  
7.25  
7.25  
7.24  
7.24  
7.20  
7.20  
7.19  
7.19  
7.07  
5.64  
4.86  
4.80  
4.71  
4.70  
4.50  
3.80  
3.74  
3.47  
2.89  
2.85  
2.85  
2.07  
2.07  
2.06  
1.99  
1.02  
1.01

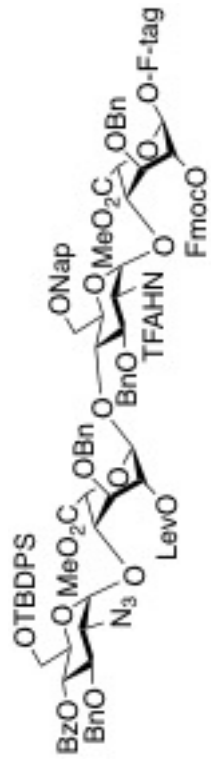

65

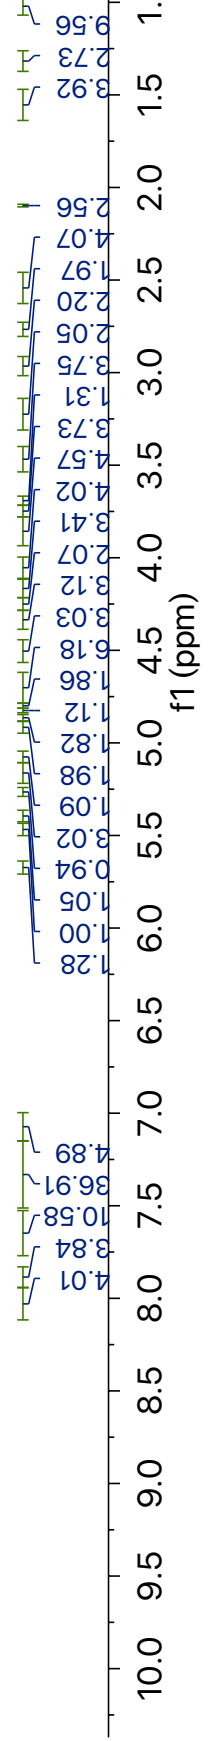

10.0  
9.5  
9.0  
8.5  
8.0  
7.5  
7.0  
6.5  
6.0  
5.5  
5.0  
4.5  
4.0  
3.5  
3.0  
2.5  
2.0  
1.5  
1.0  
0.5  
0.0  
-0.5  
-1.0

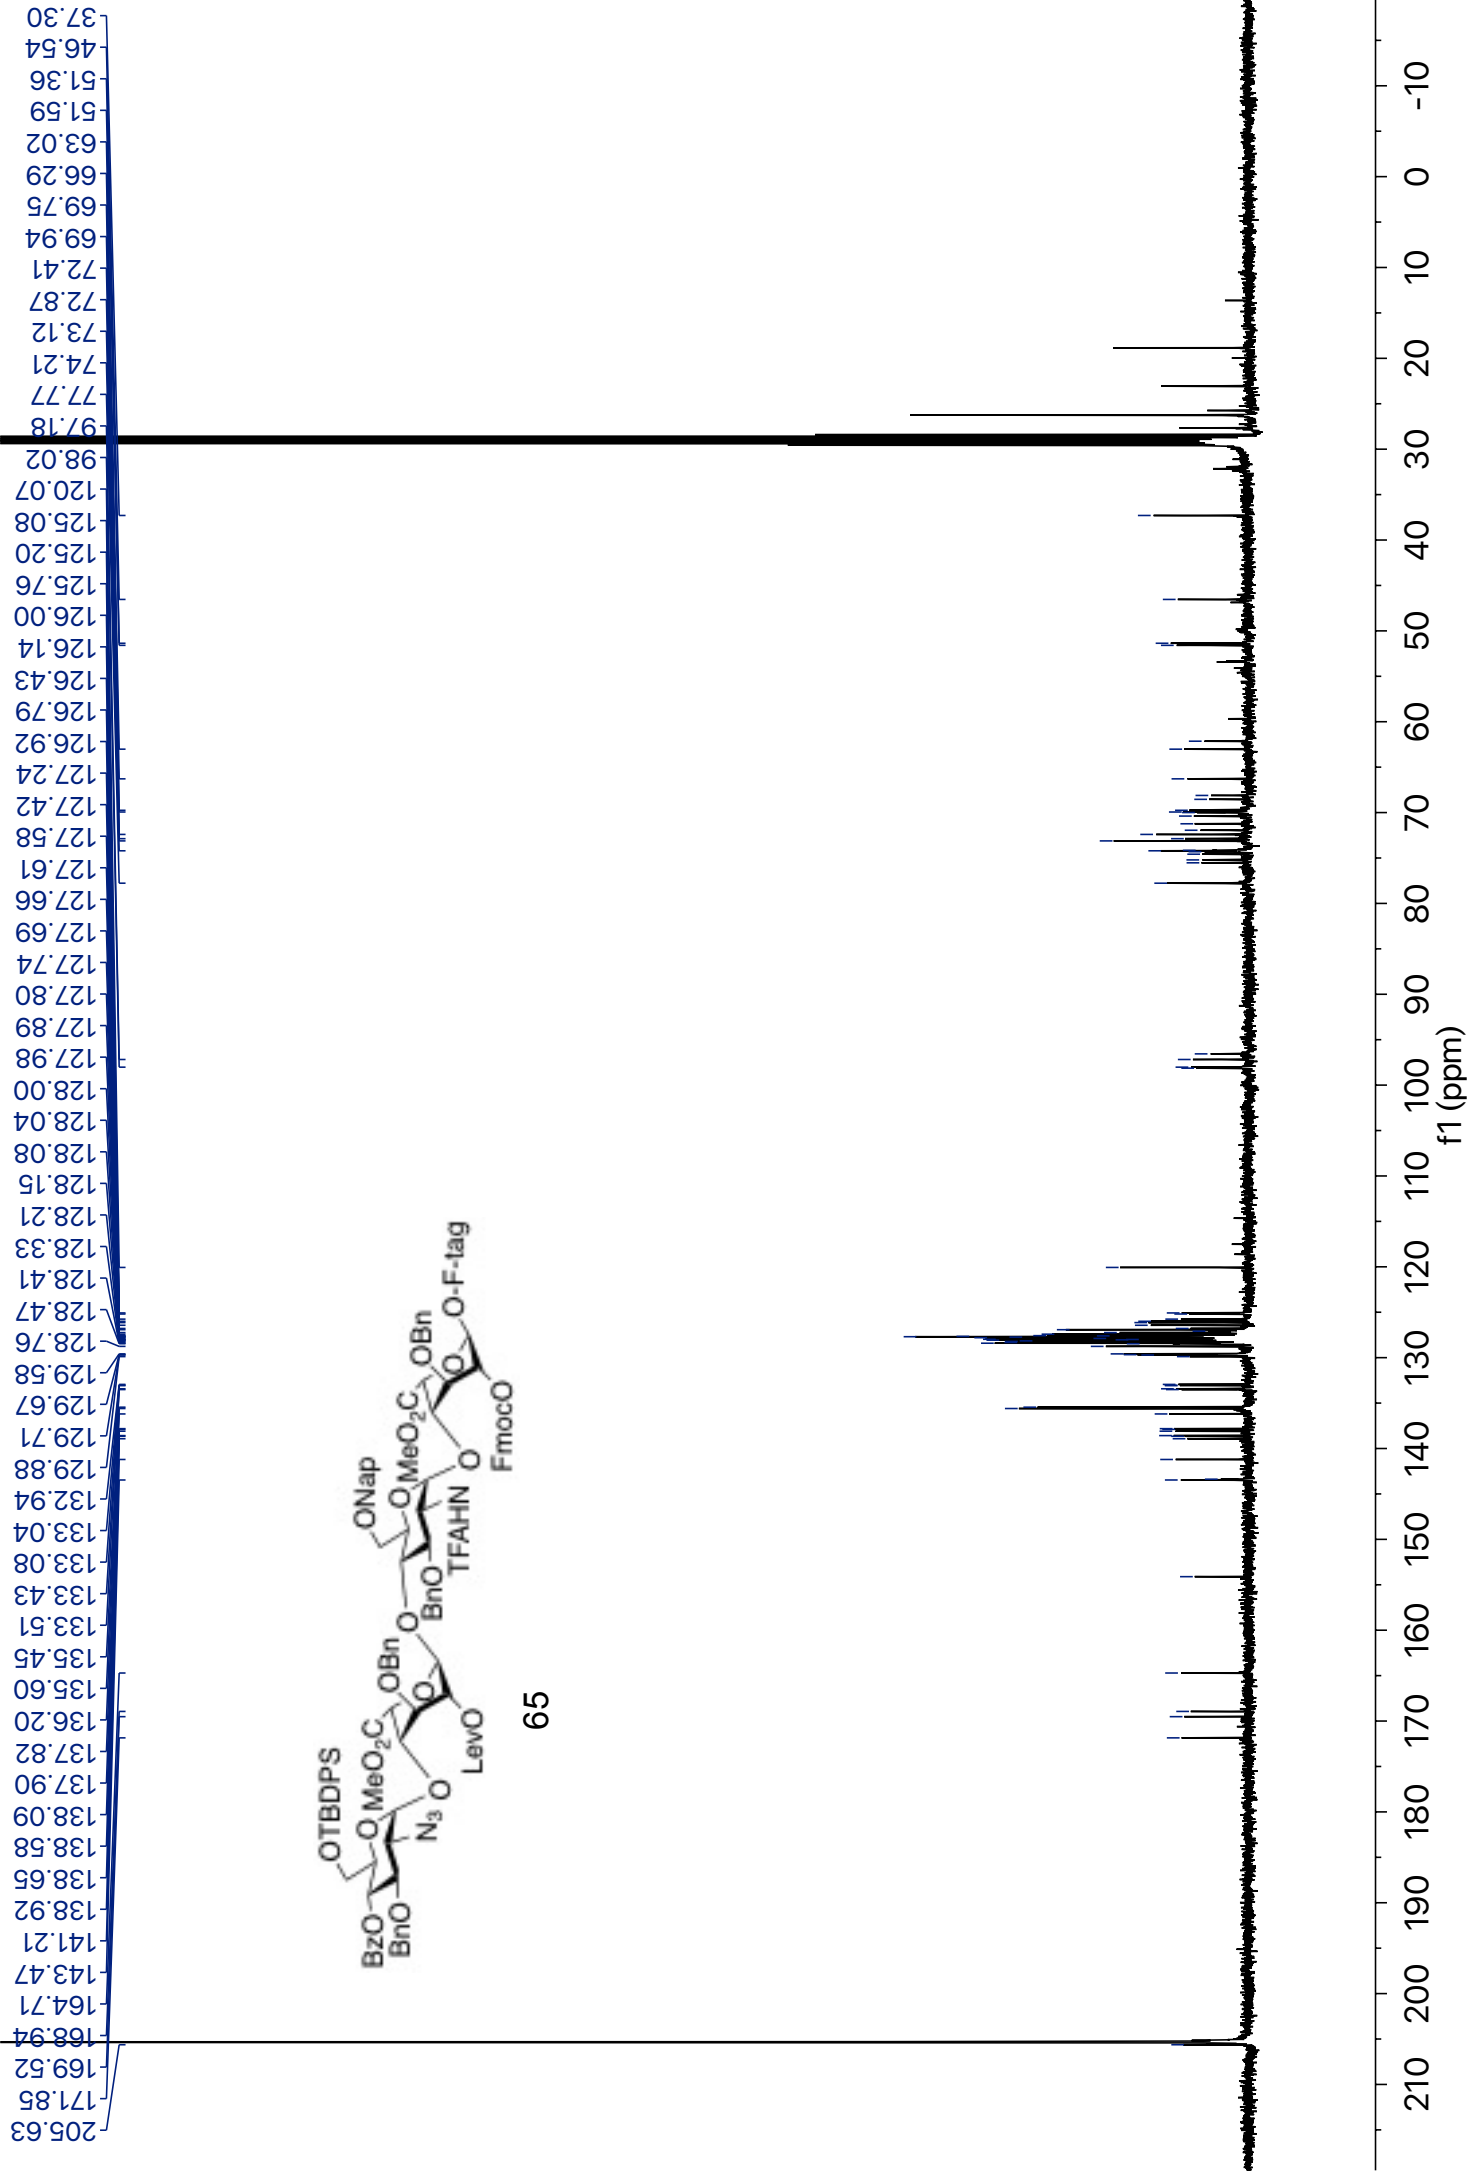

WL-2-120-FmocTetra-HSQC-C-H.3.1.2rr

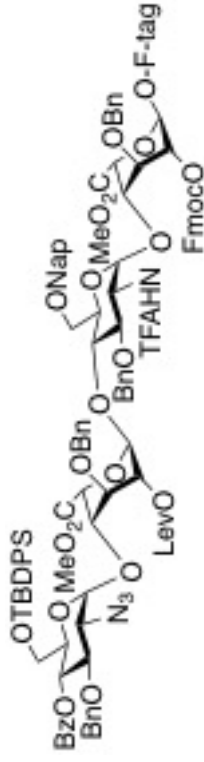

65

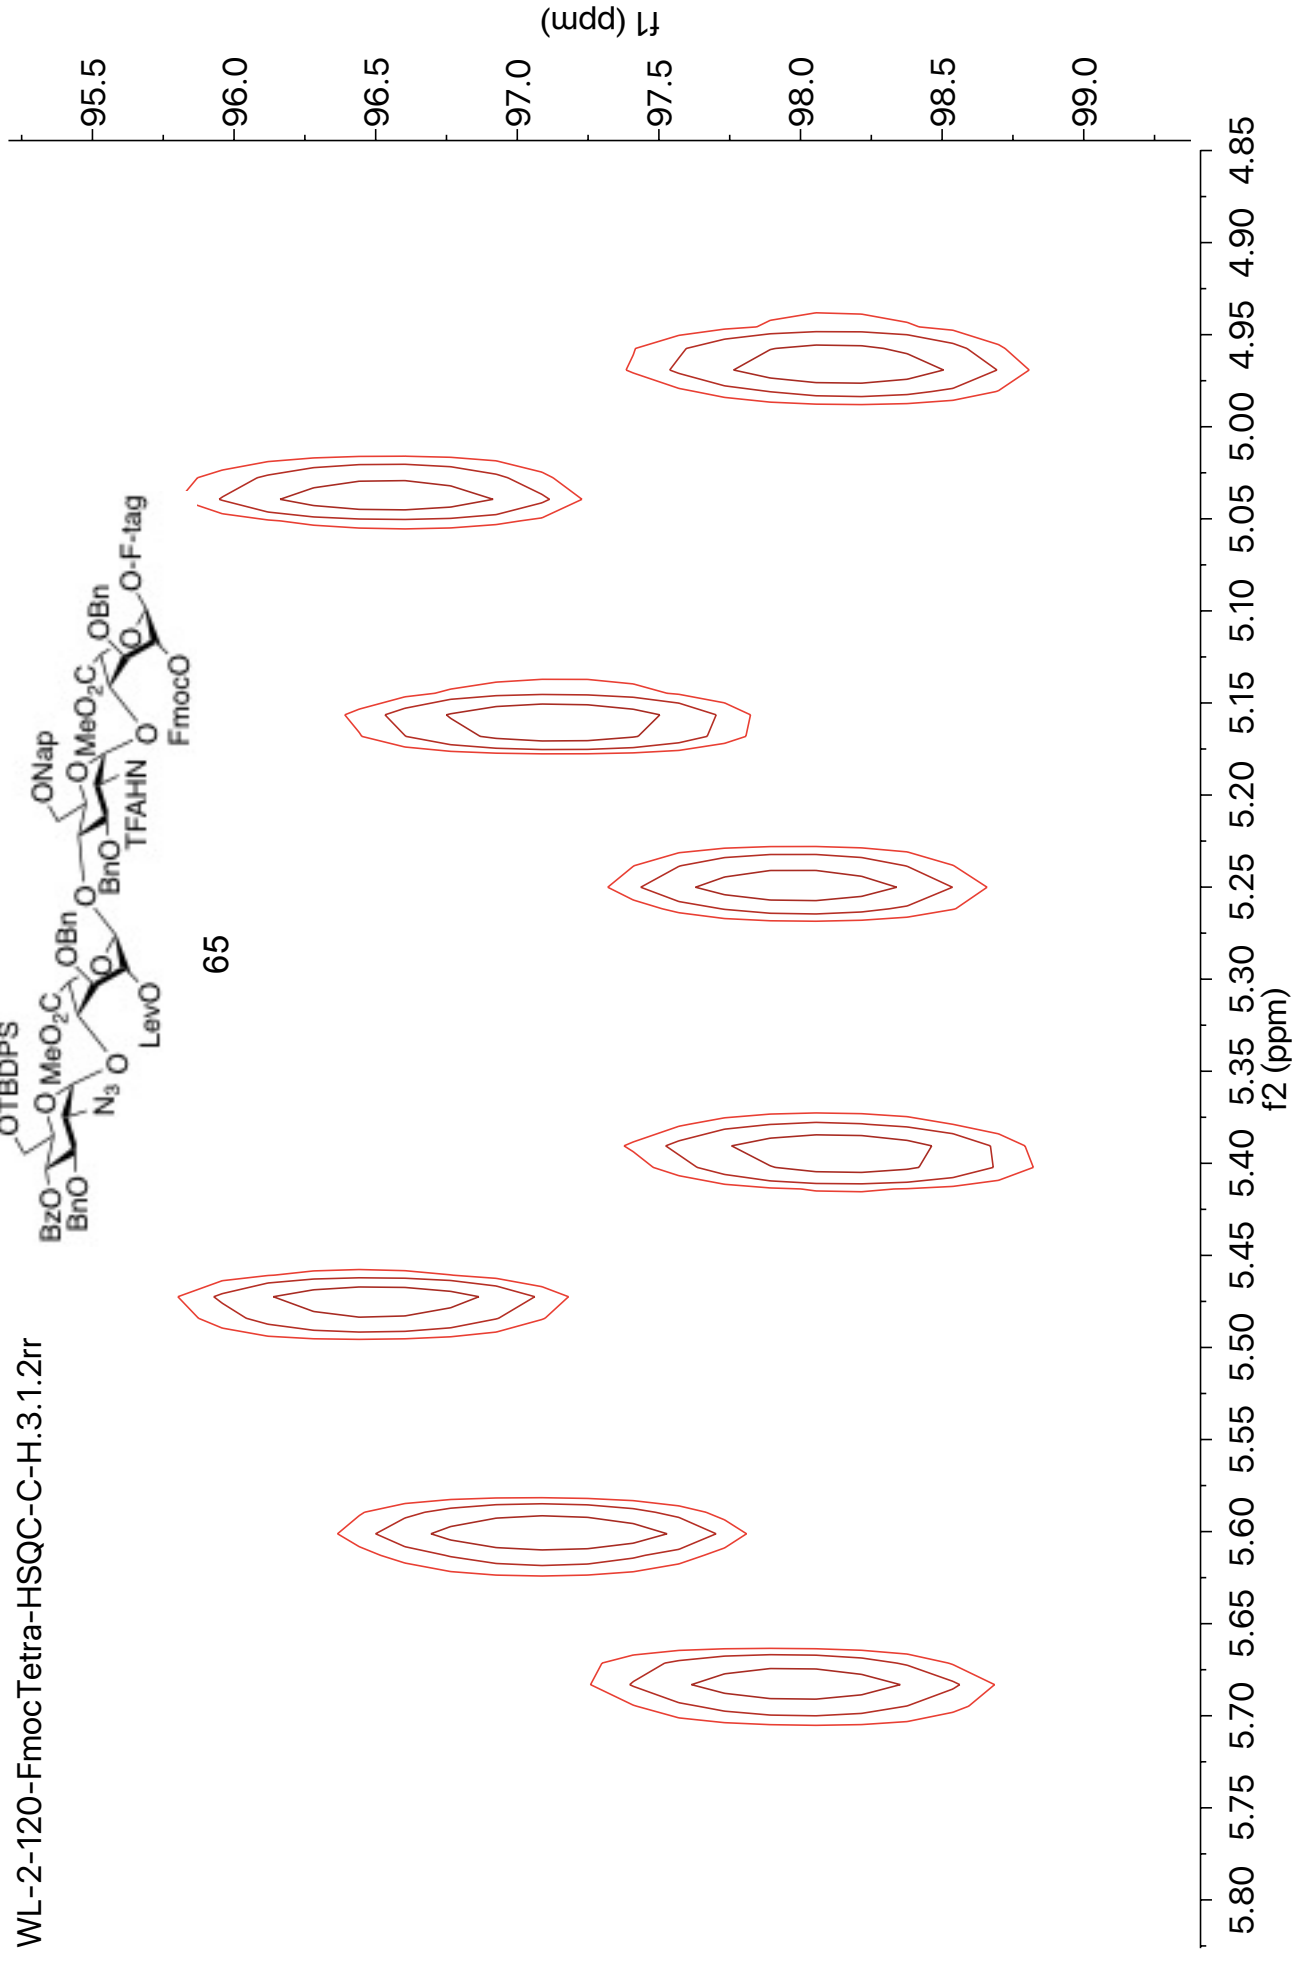

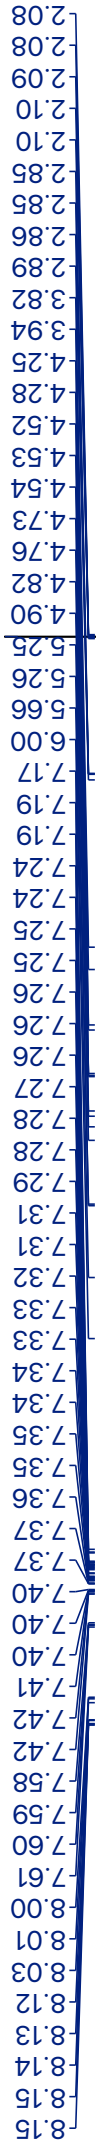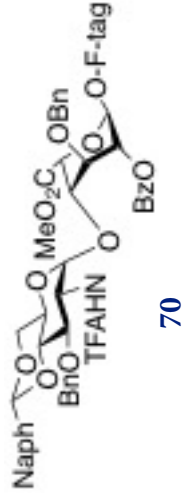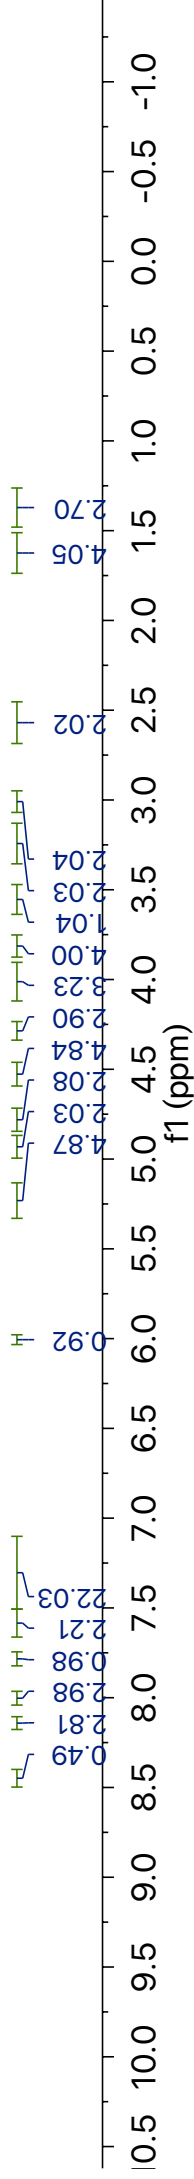

WL-2-209-F6-Glyco-Prod-C.2.1.1r —

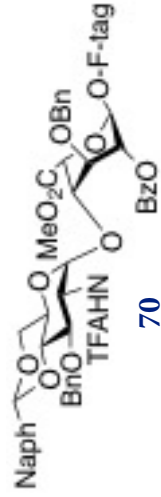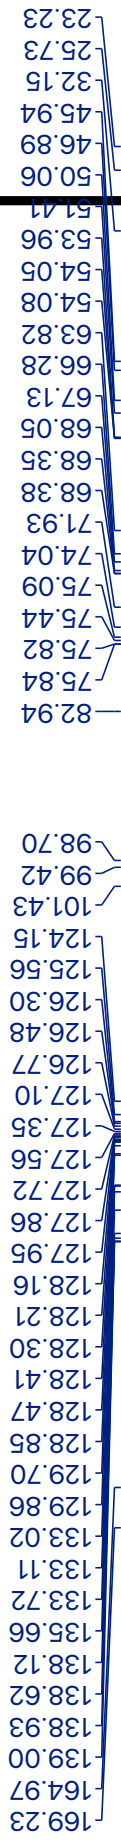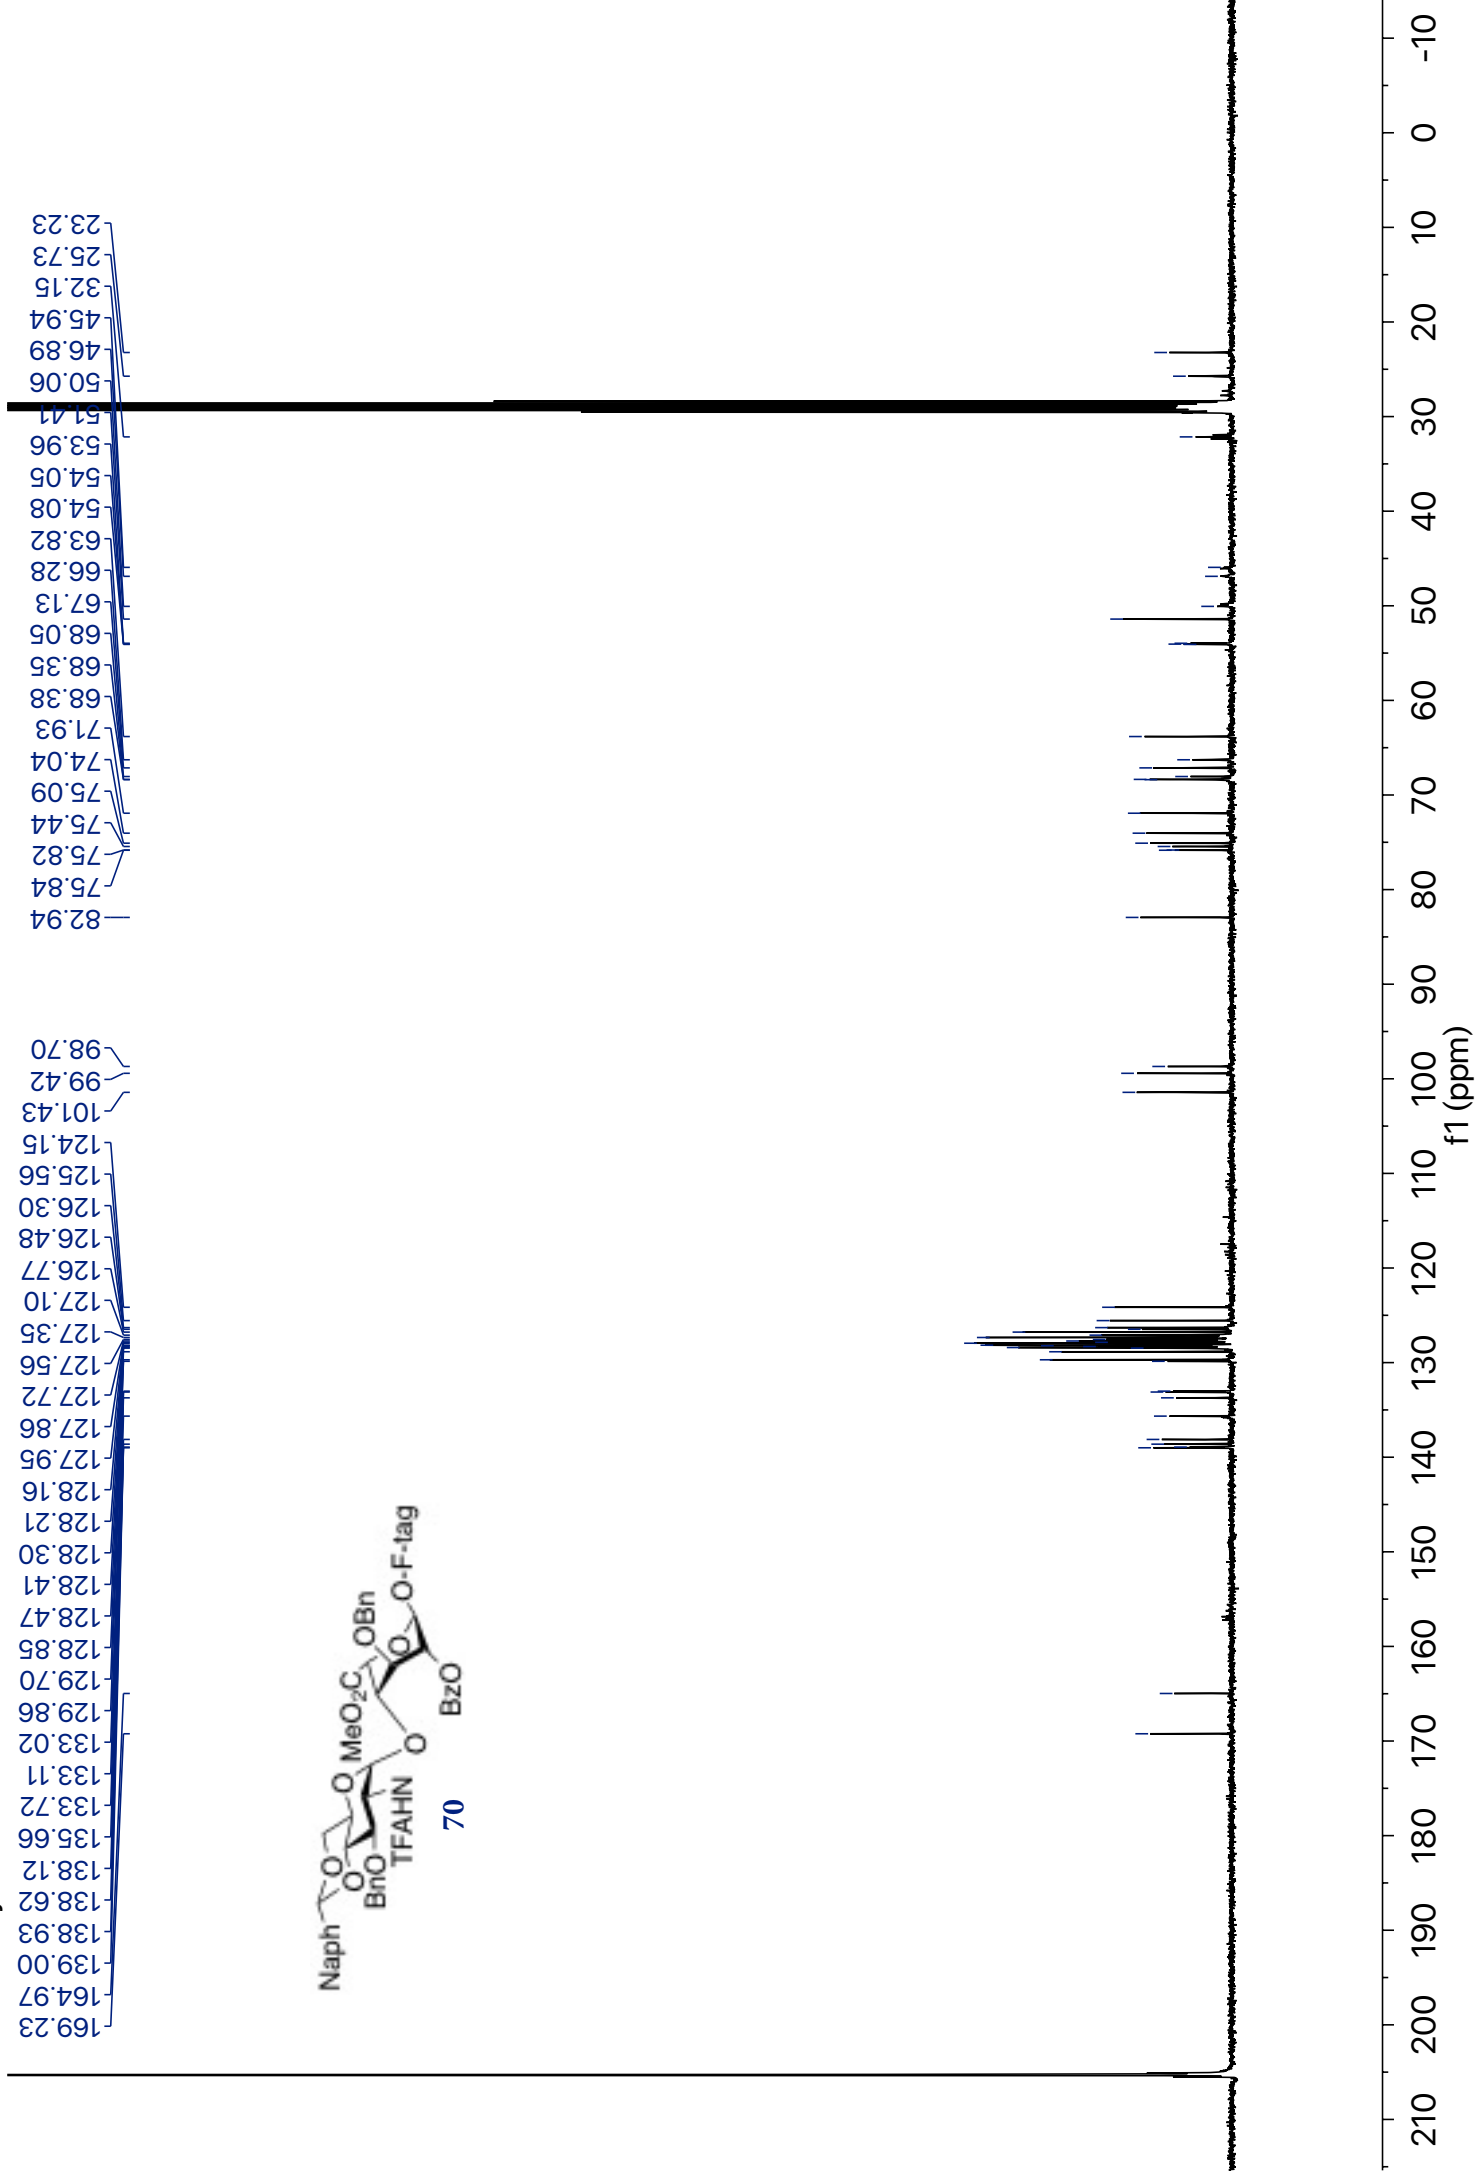



WL-2-209-F6-Glyco-Prod-HSQC-CH.10.1.2rr

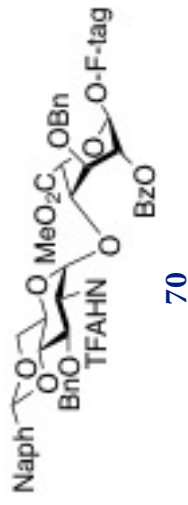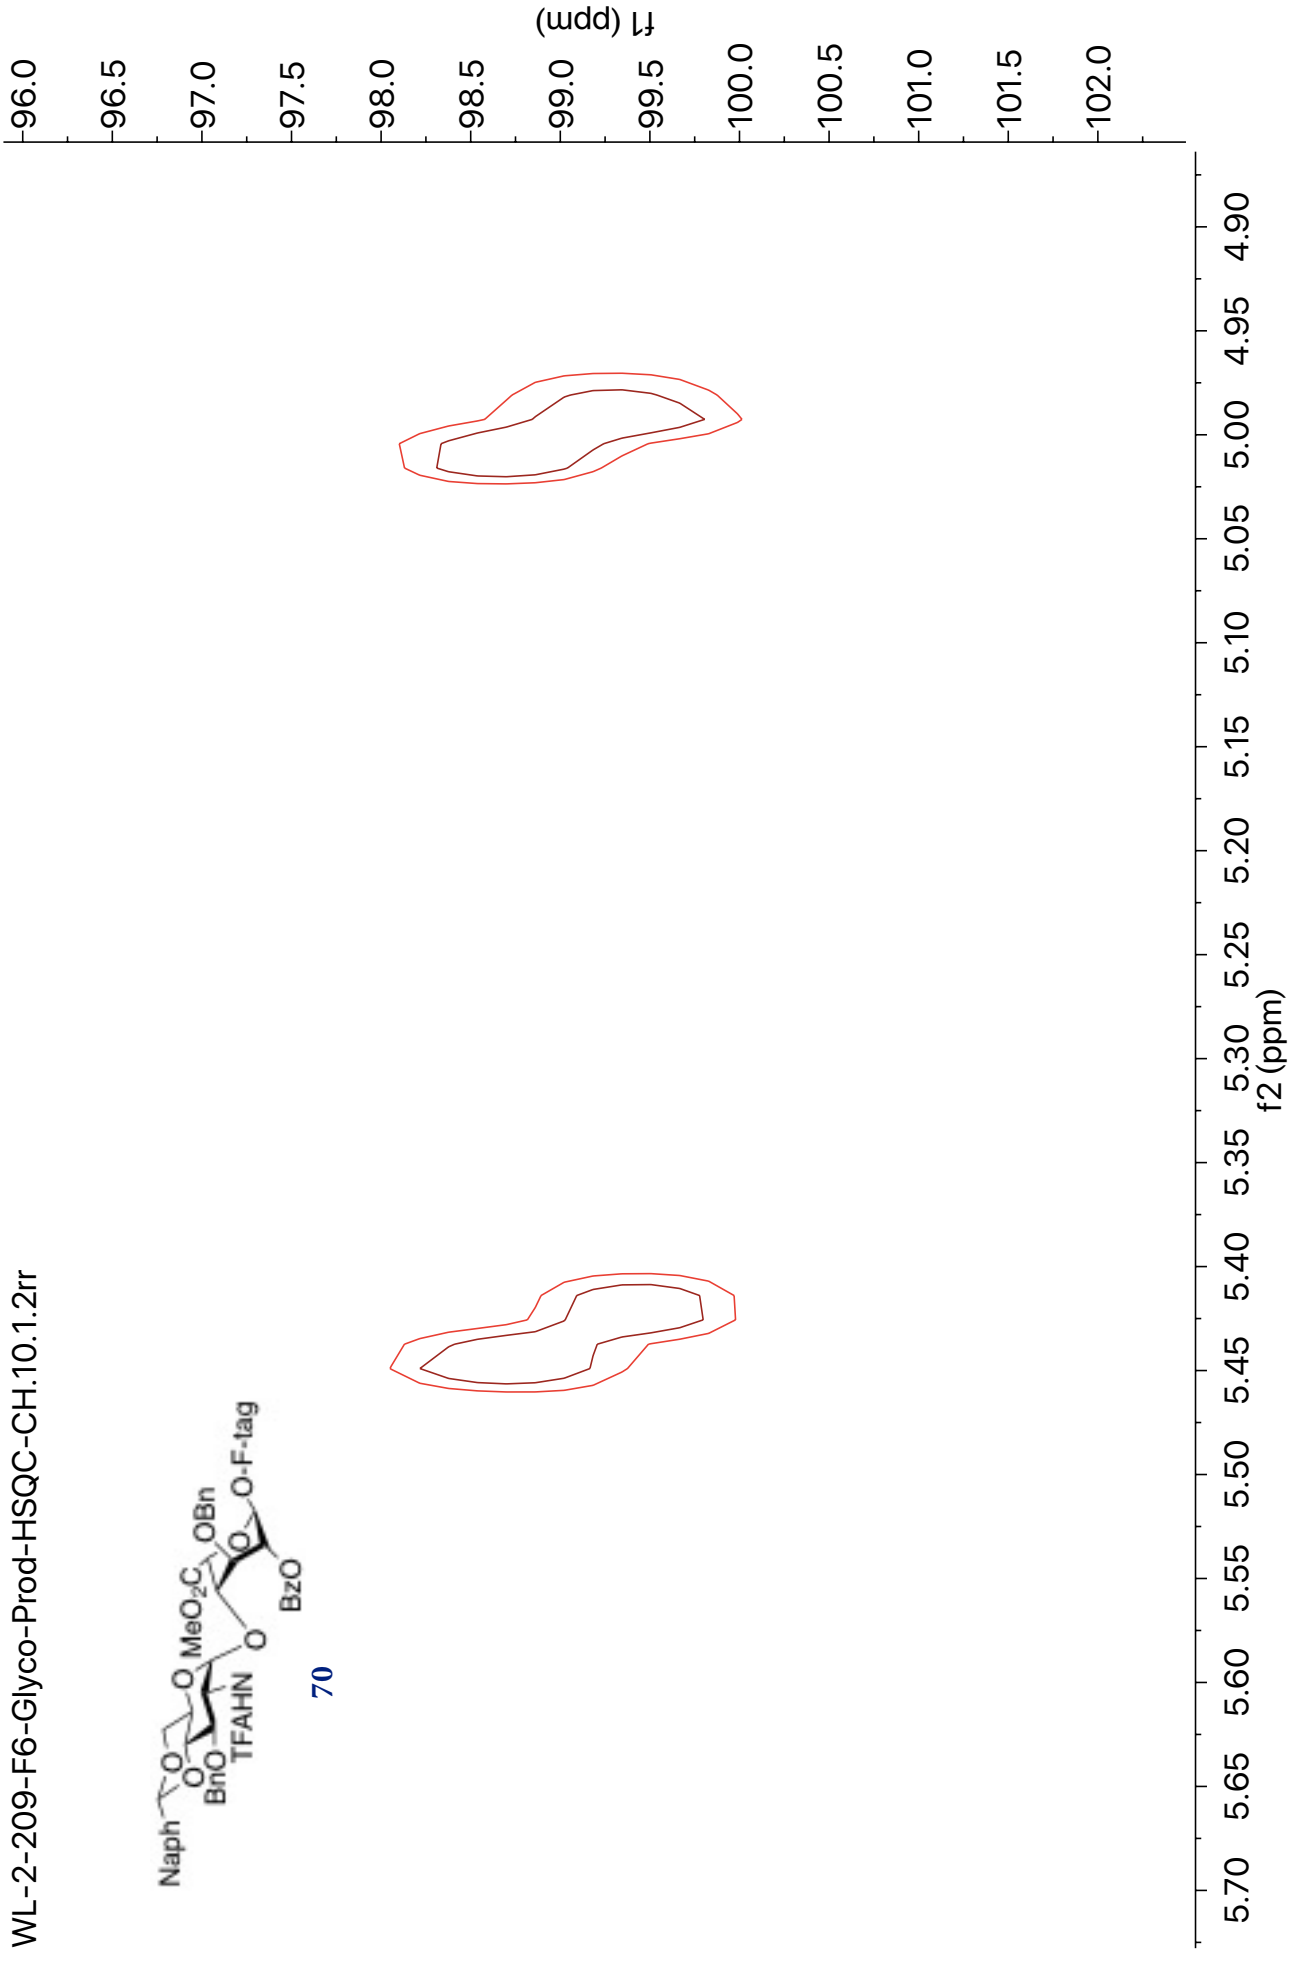

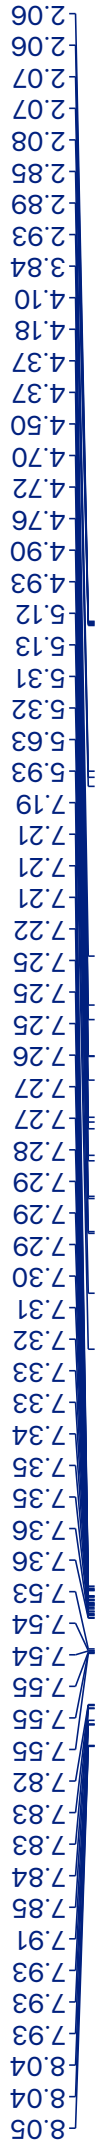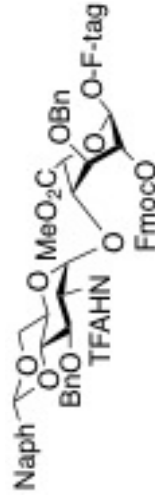

71

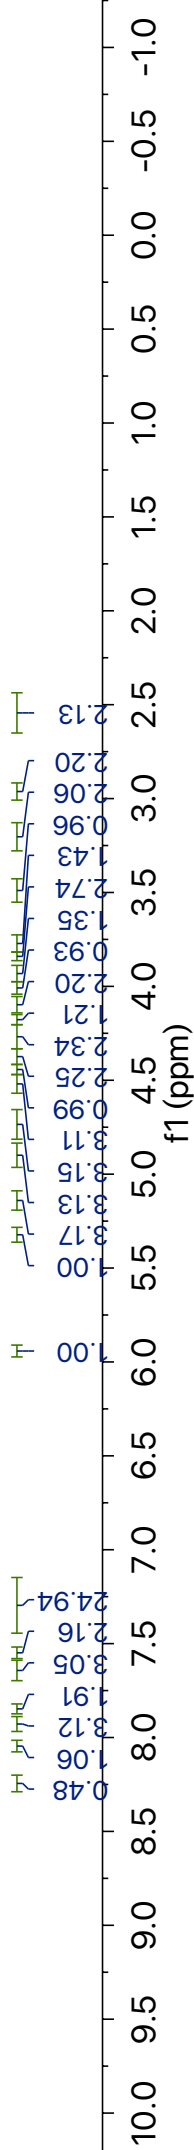

128.46  
128.40  
128.30  
128.24  
128.15  
127.96  
127.85  
127.81  
127.65  
127.63  
127.51  
127.23  
127.17  
127.07  
126.40  
126.20  
125.43  
125.21  
125.09  
124.03  
120.04  
101.24  
98.21  
97.74  
82.37  
76.35  
75.02  
74.11  
73.80  
73.24  
72.48  
69.93  
68.84  
68.41  
68.30  
66.28  
63.74  
53.55  
53.46  
51.63  
46.52  
32.14  
25.73  
23.10

154.10  
143.39  
141.21  
141.17  
138.92  
138.86  
138.59  
137.89

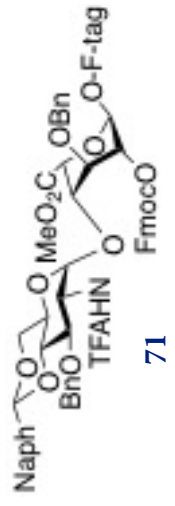

71

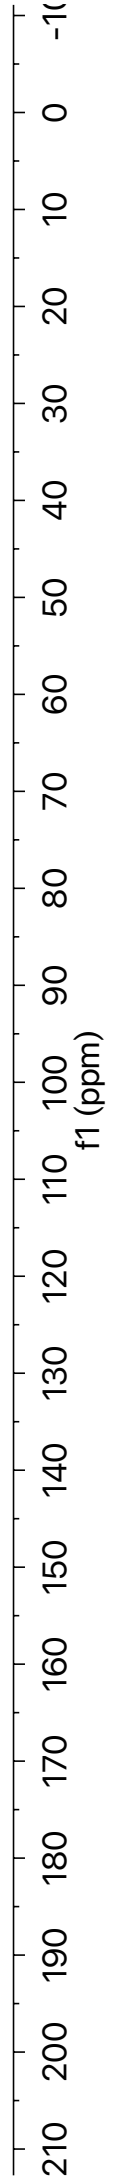

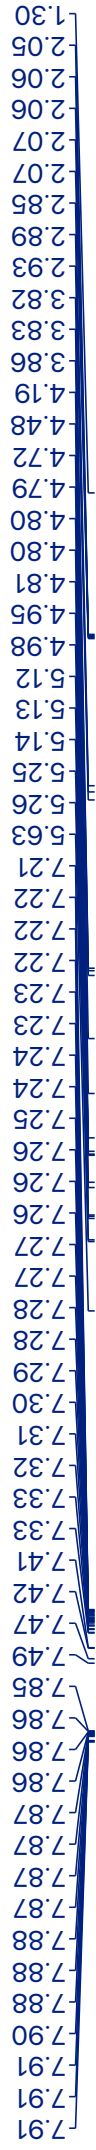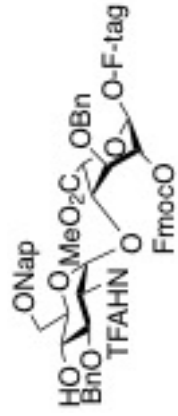

72

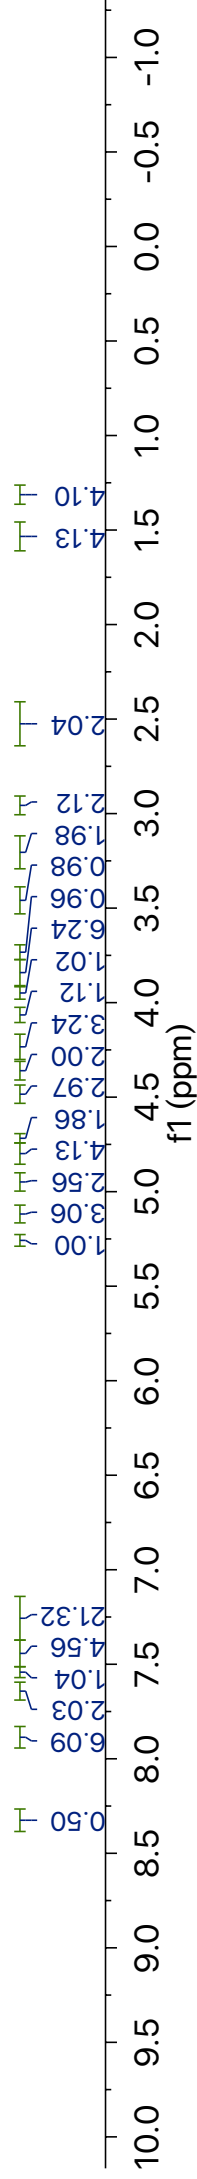

WL-2-118-Fmoc-Acceptor-C.2.1.1r

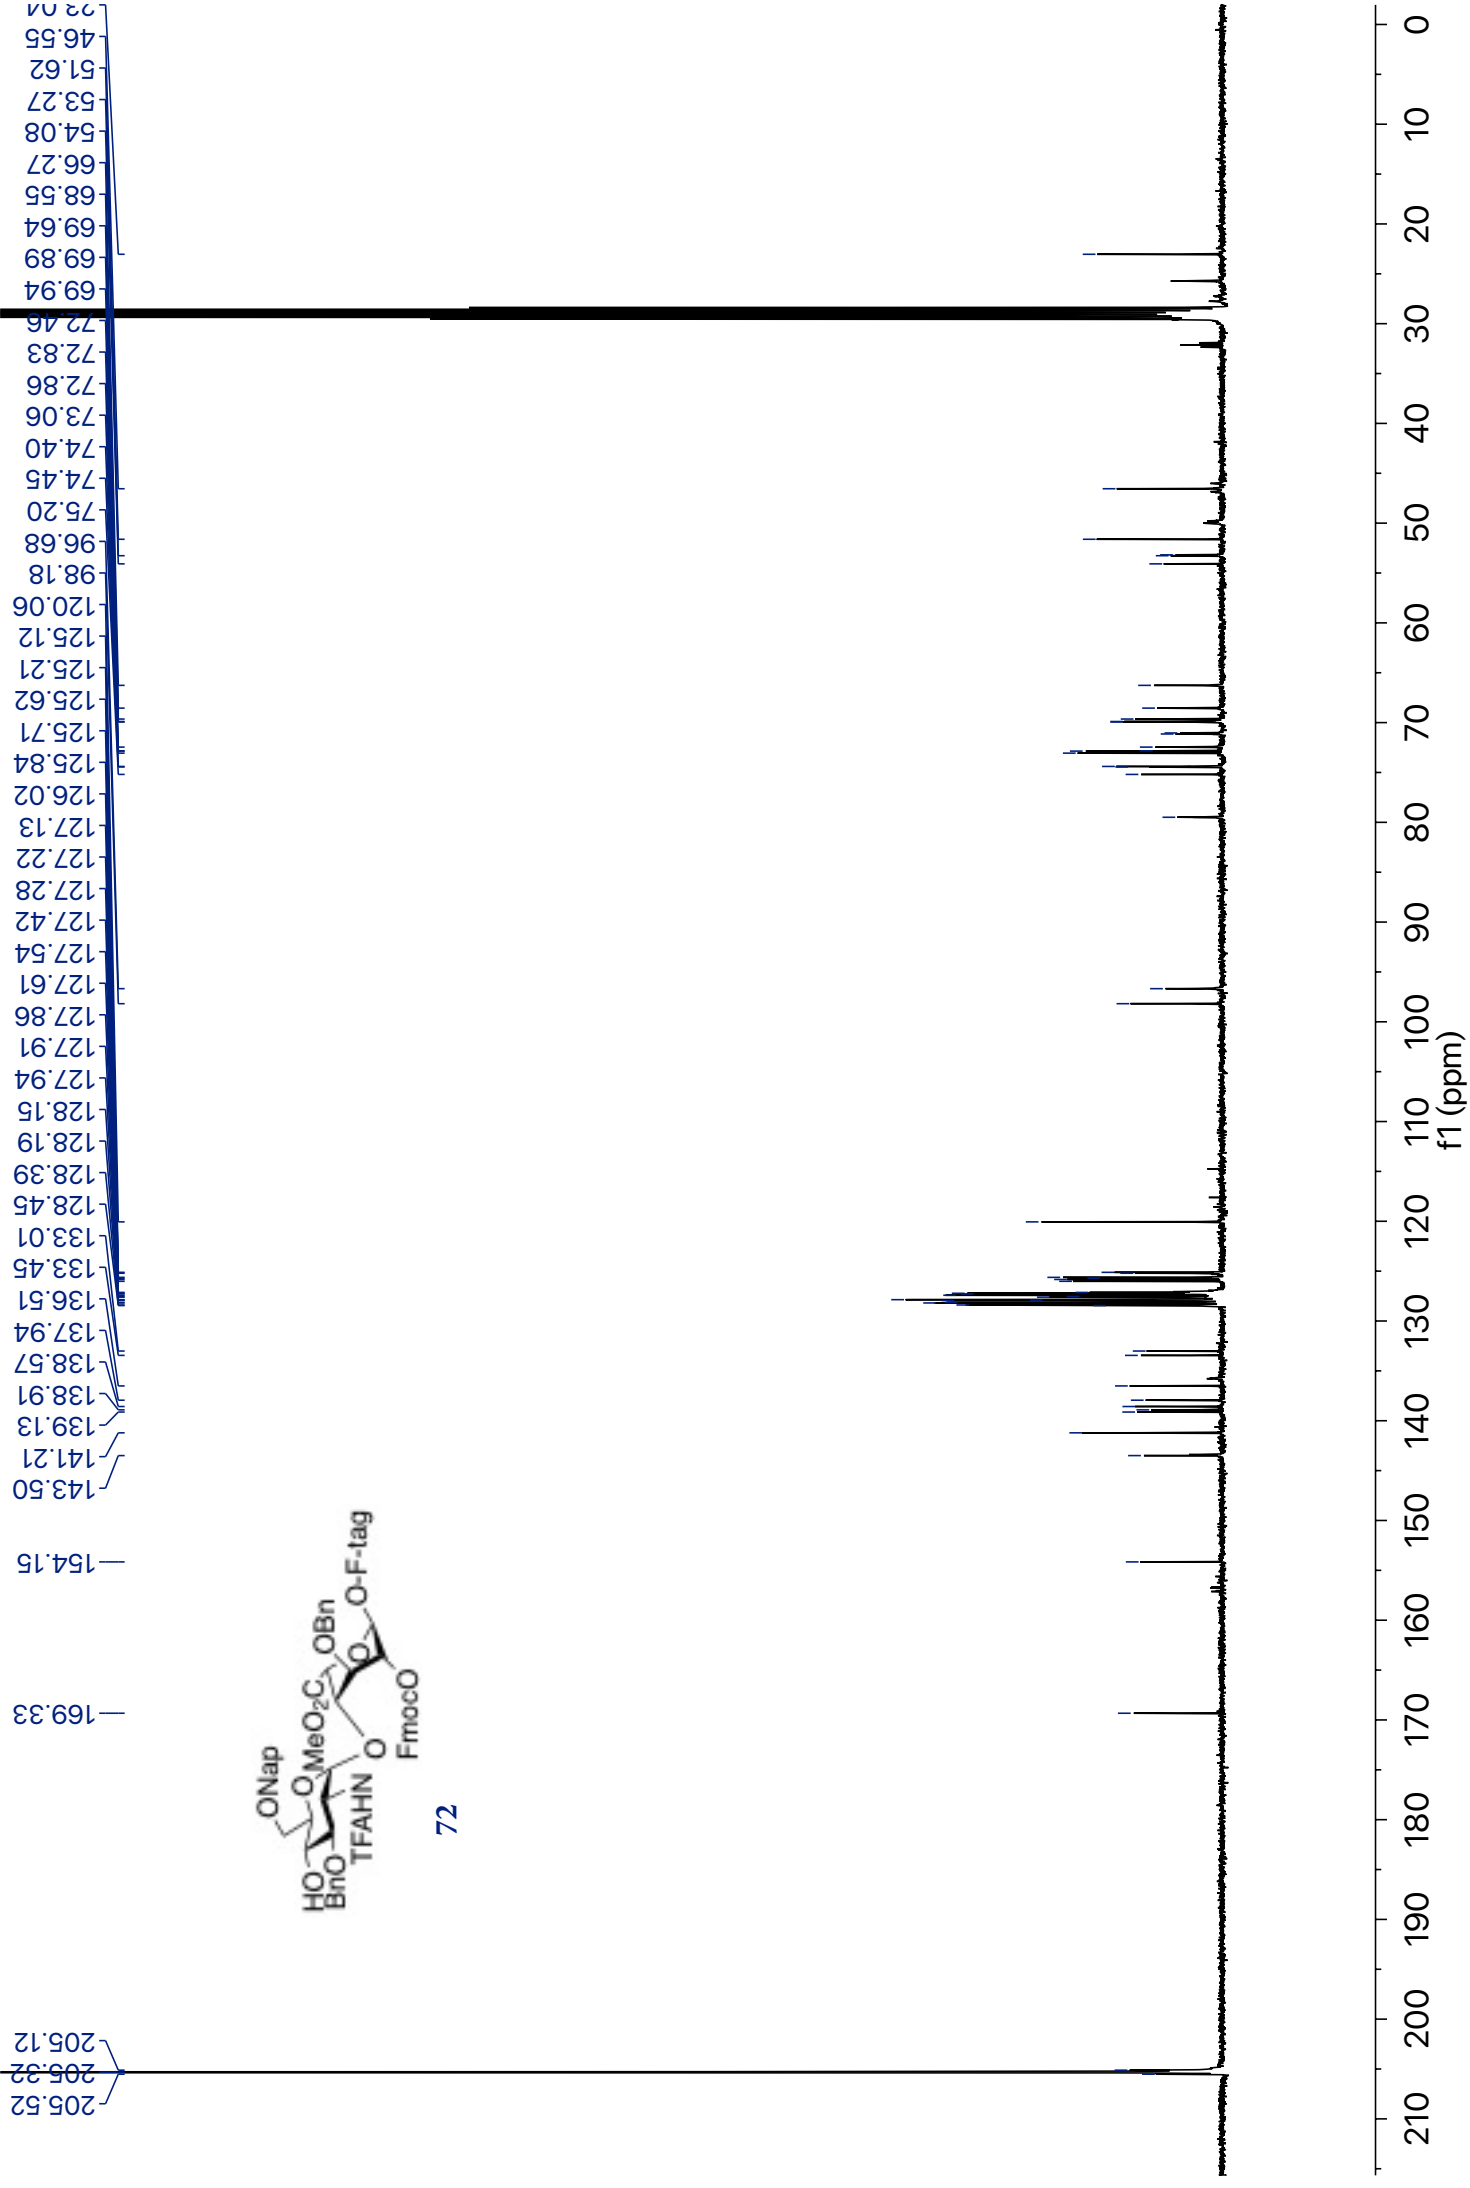

8.03  
8.01  
8.01  
7.74  
7.73  
7.72  
7.63  
7.61  
7.61  
7.54  
7.53  
7.46  
7.45  
7.44  
7.44  
7.43  
7.42  
7.39  
7.38  
7.37  
7.37  
7.36  
7.36  
7.36  
7.35  
7.34  
7.34  
7.34  
7.34  
7.33  
7.33  
7.33  
7.32  
7.32  
7.31  
7.30  
7.28  
7.28  
7.26  
7.25  
7.25  
7.23  
7.23  
7.18  
7.18  
7.17  
7.11  
7.11  
7.10  
7.09  
7.09  
4.81  
4.78  
4.78  
4.73  
4.51  
3.80  
3.79  
3.78  
3.71  
2.94  
2.92  
2.90  
1.01

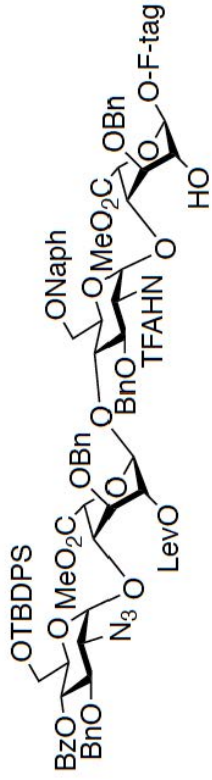

75

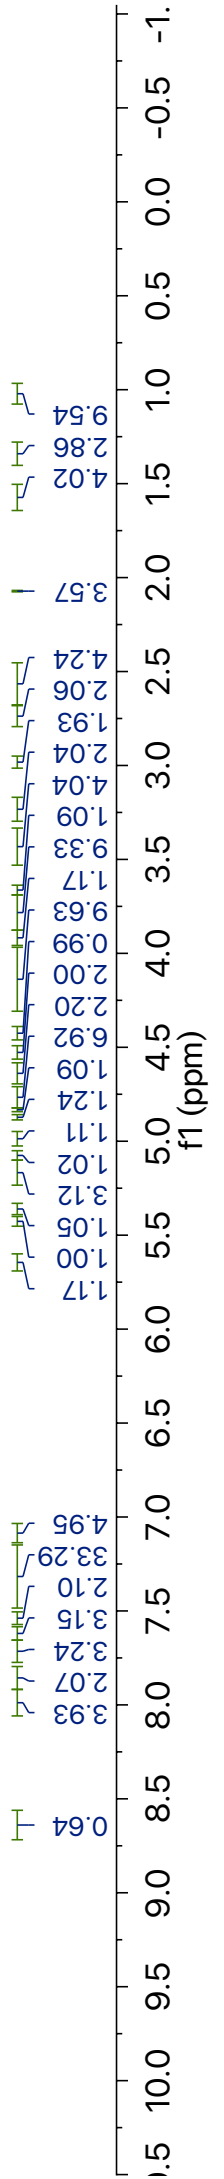

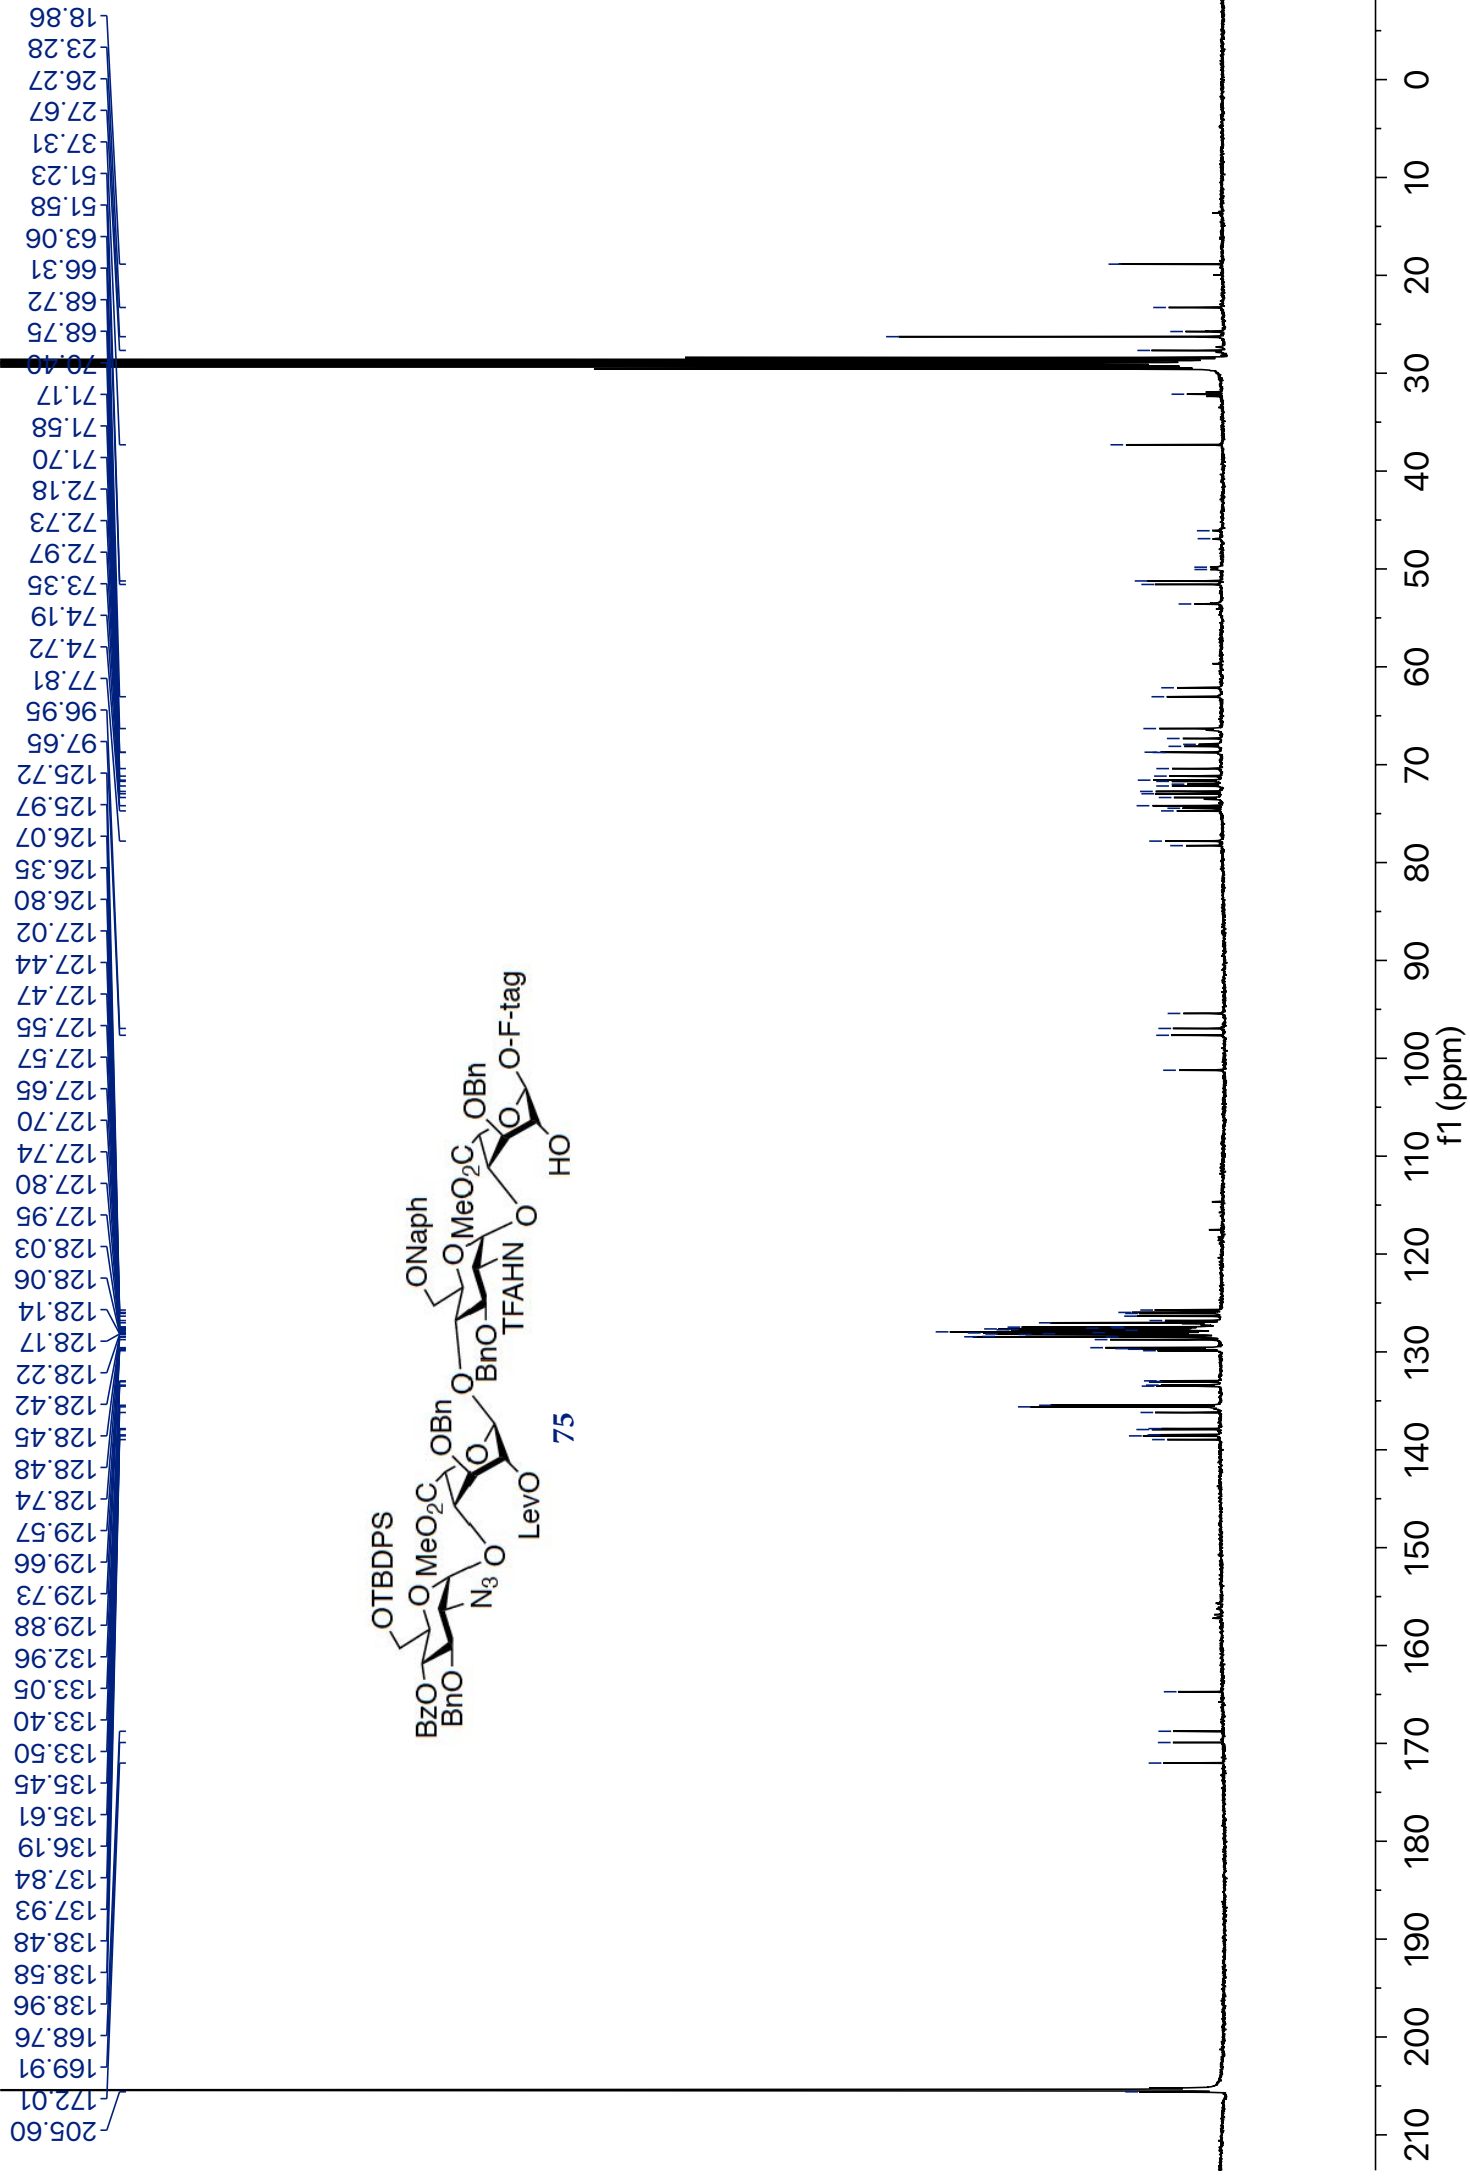

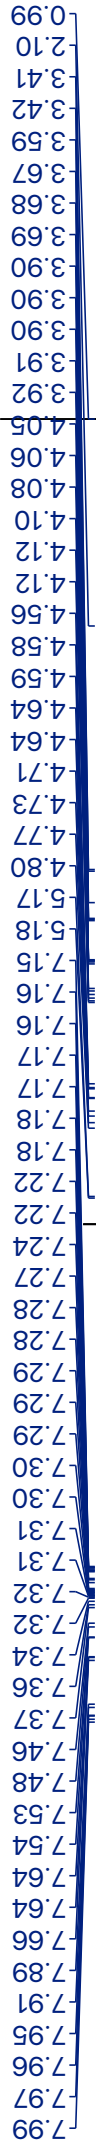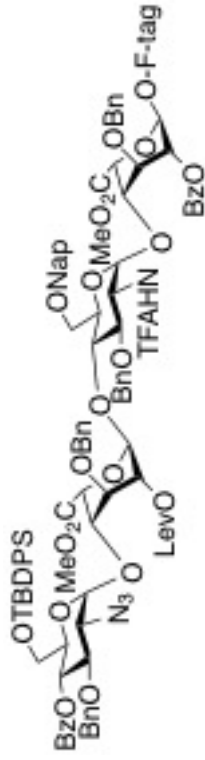

76

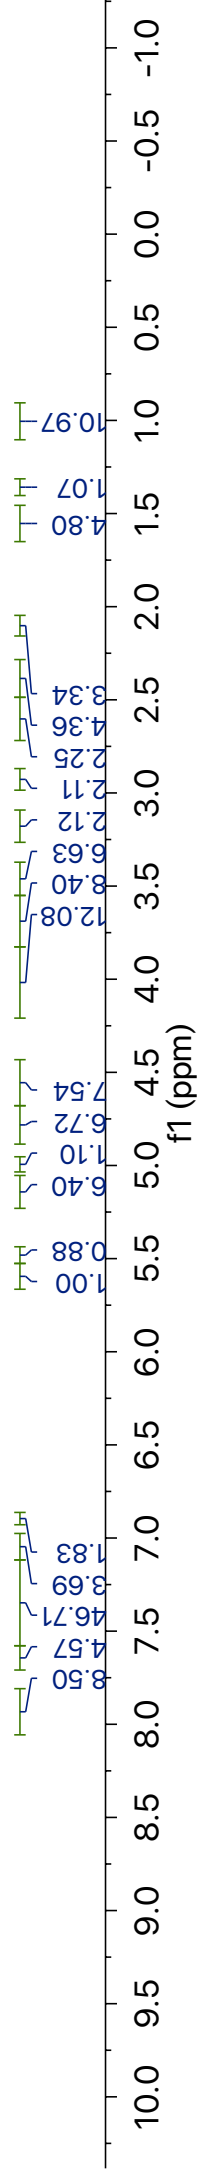



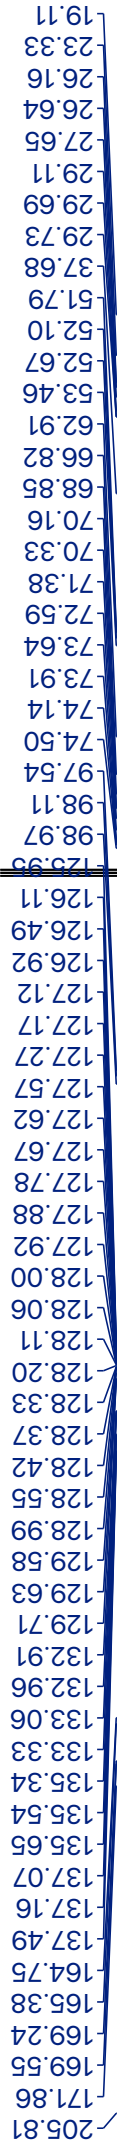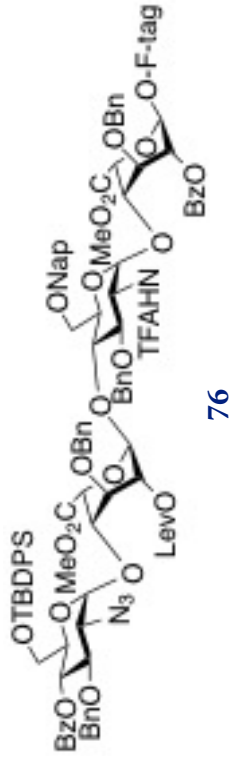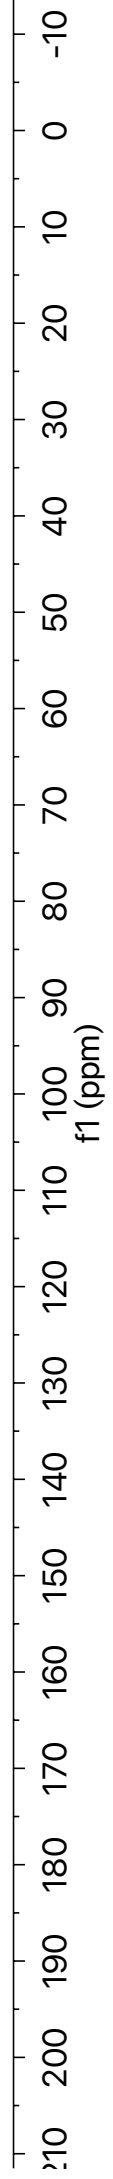

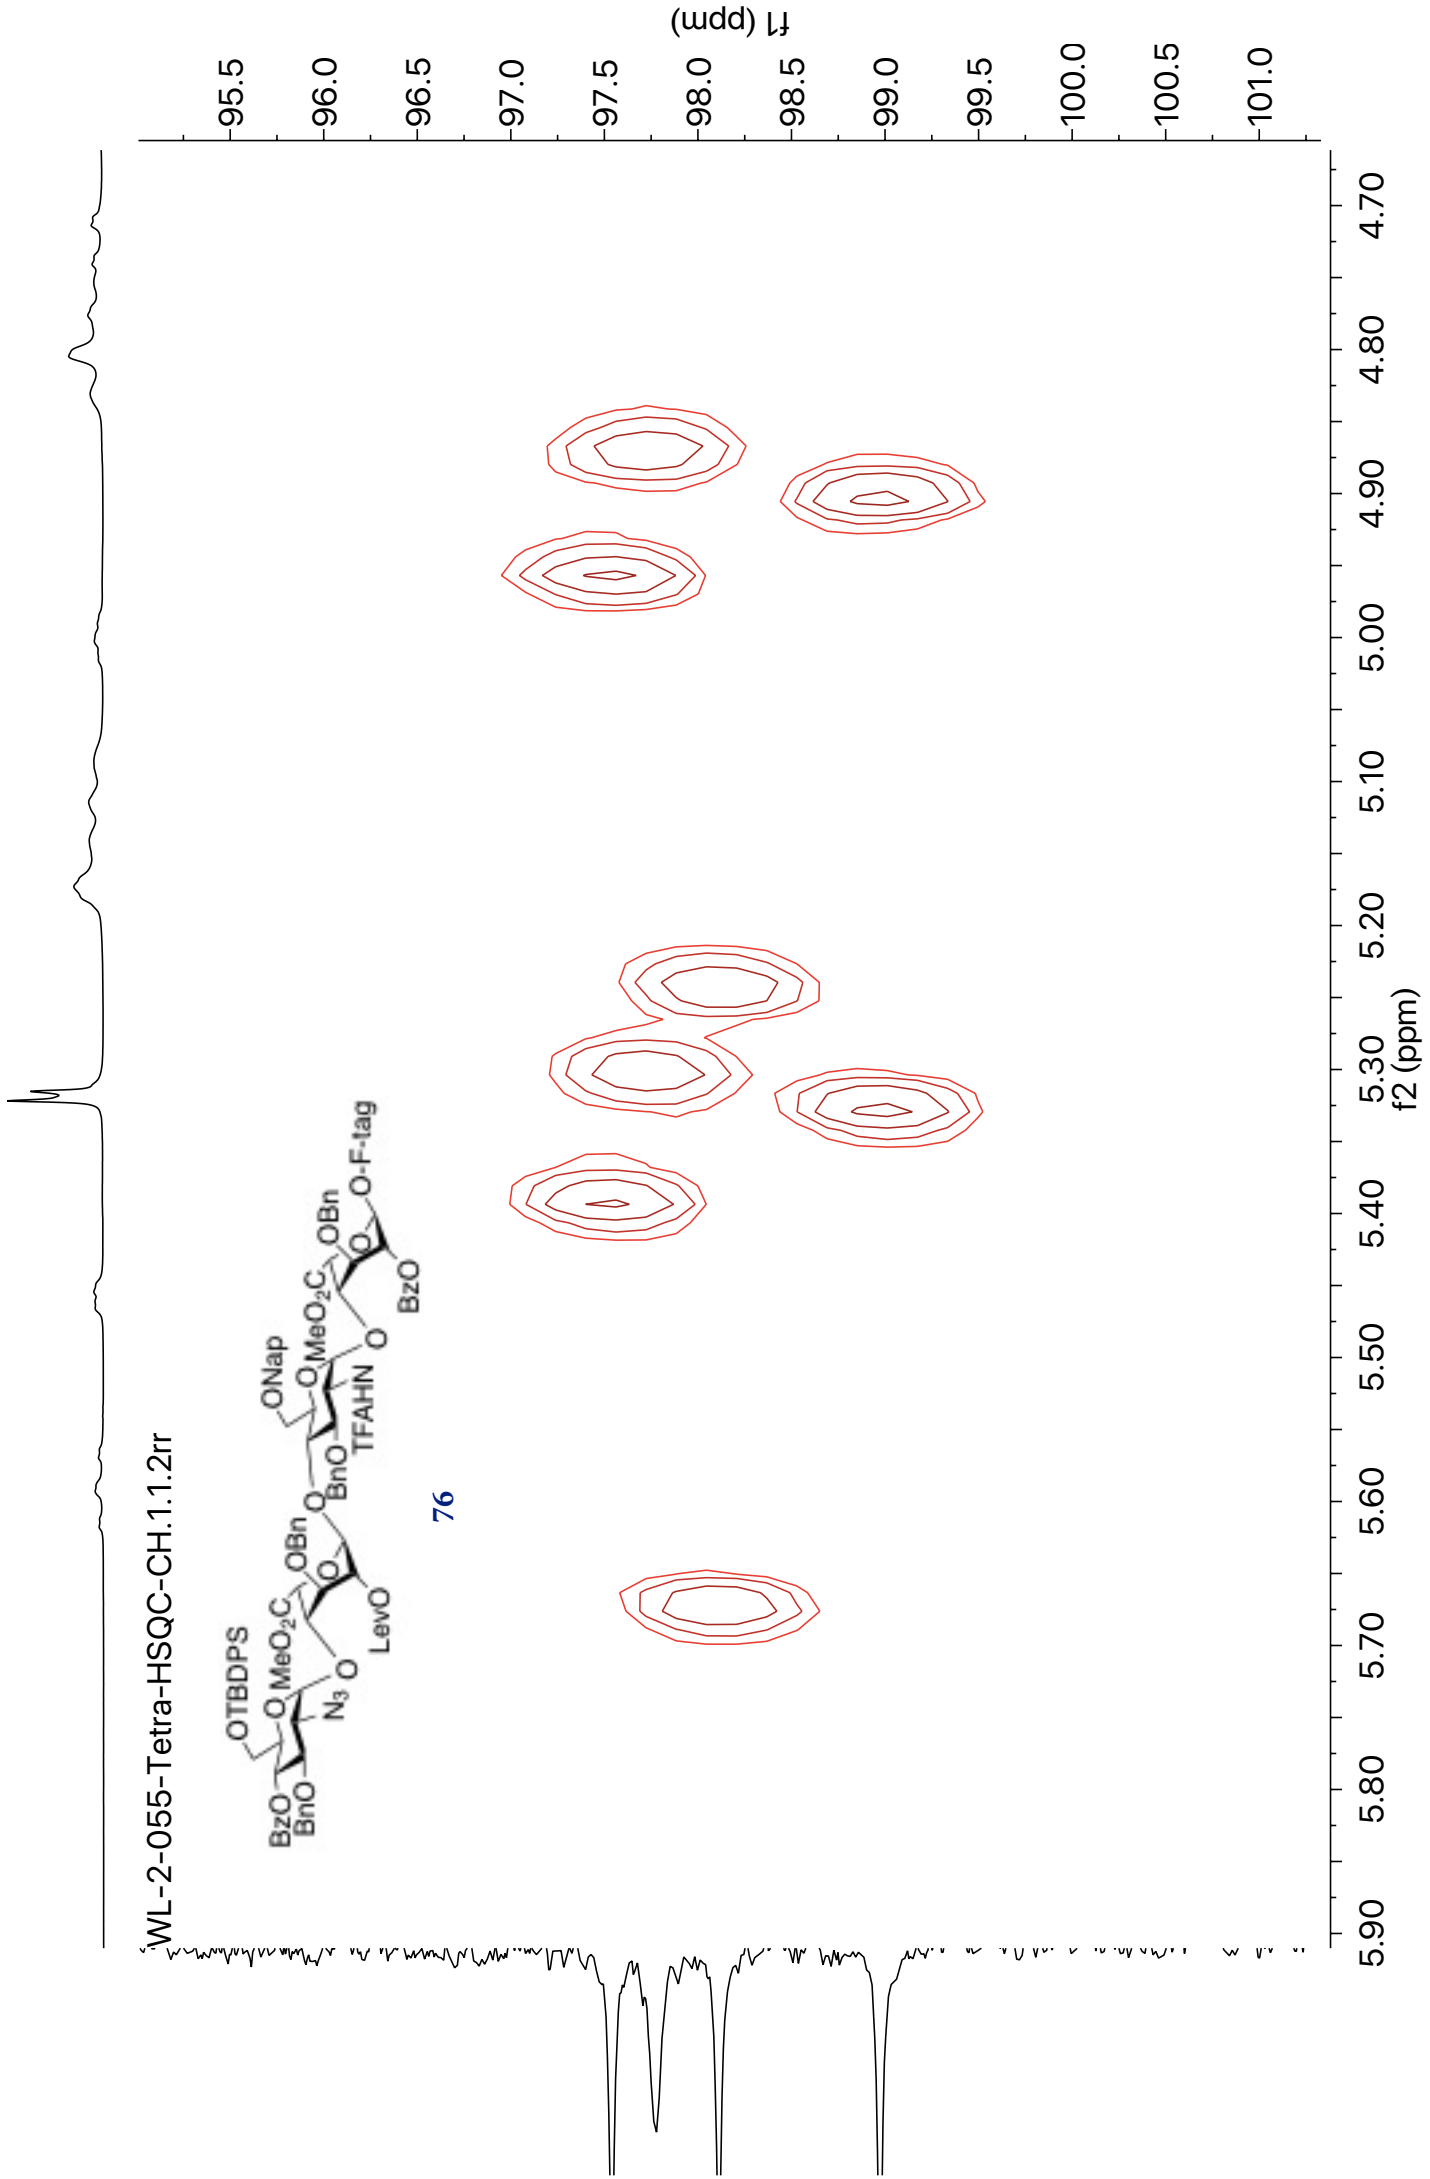

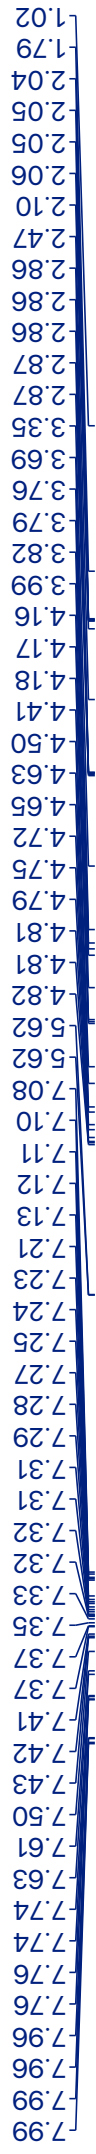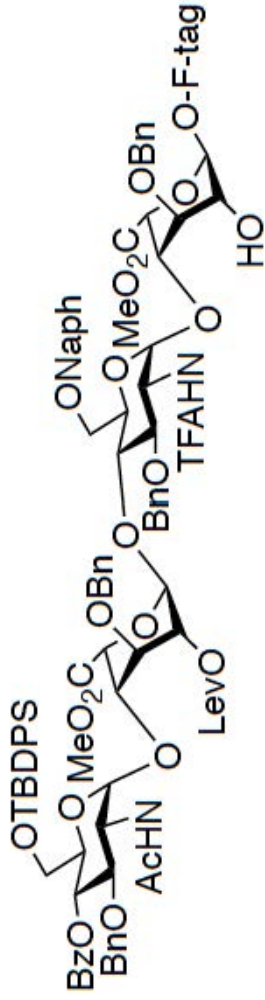

77

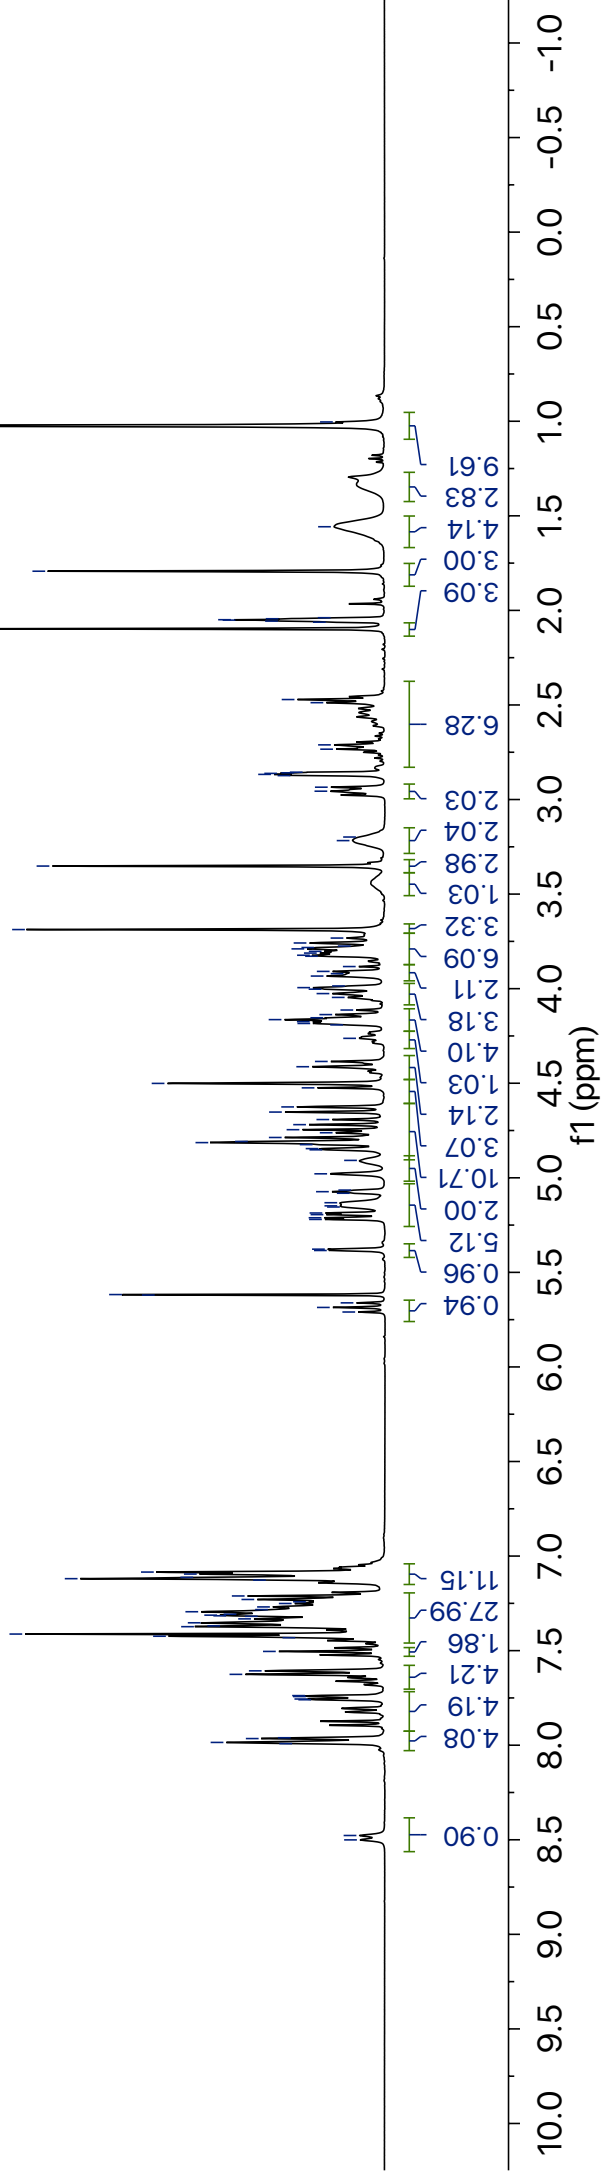

WL-2-122-D-N-Acetylation-C.1.1.1r —

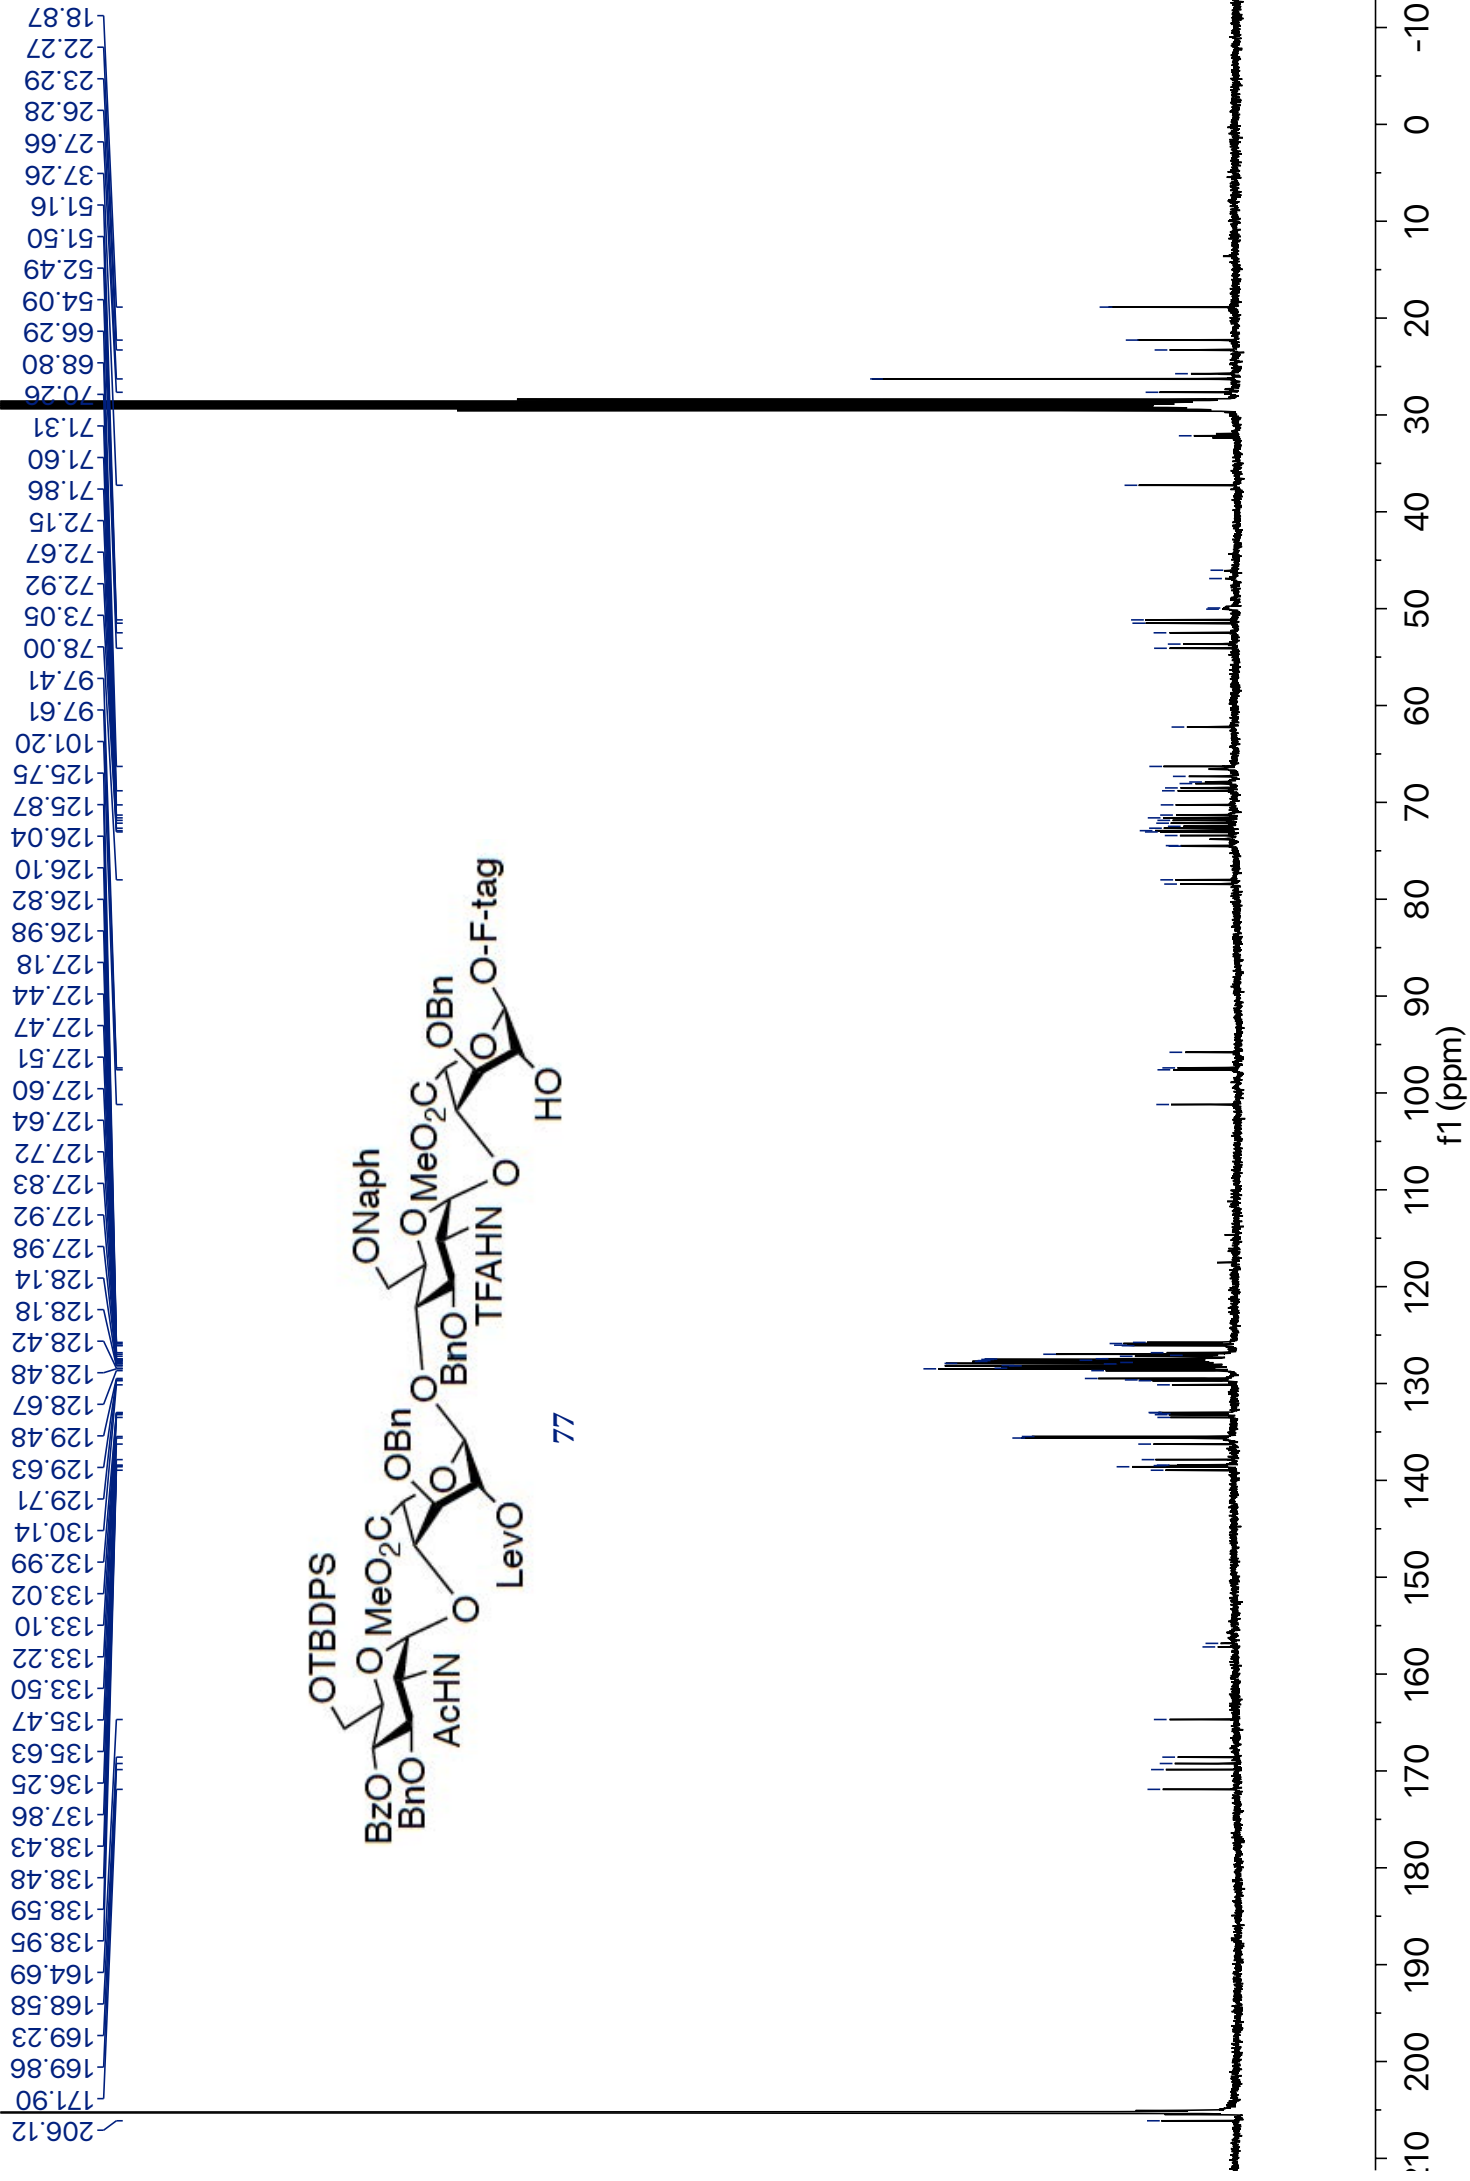

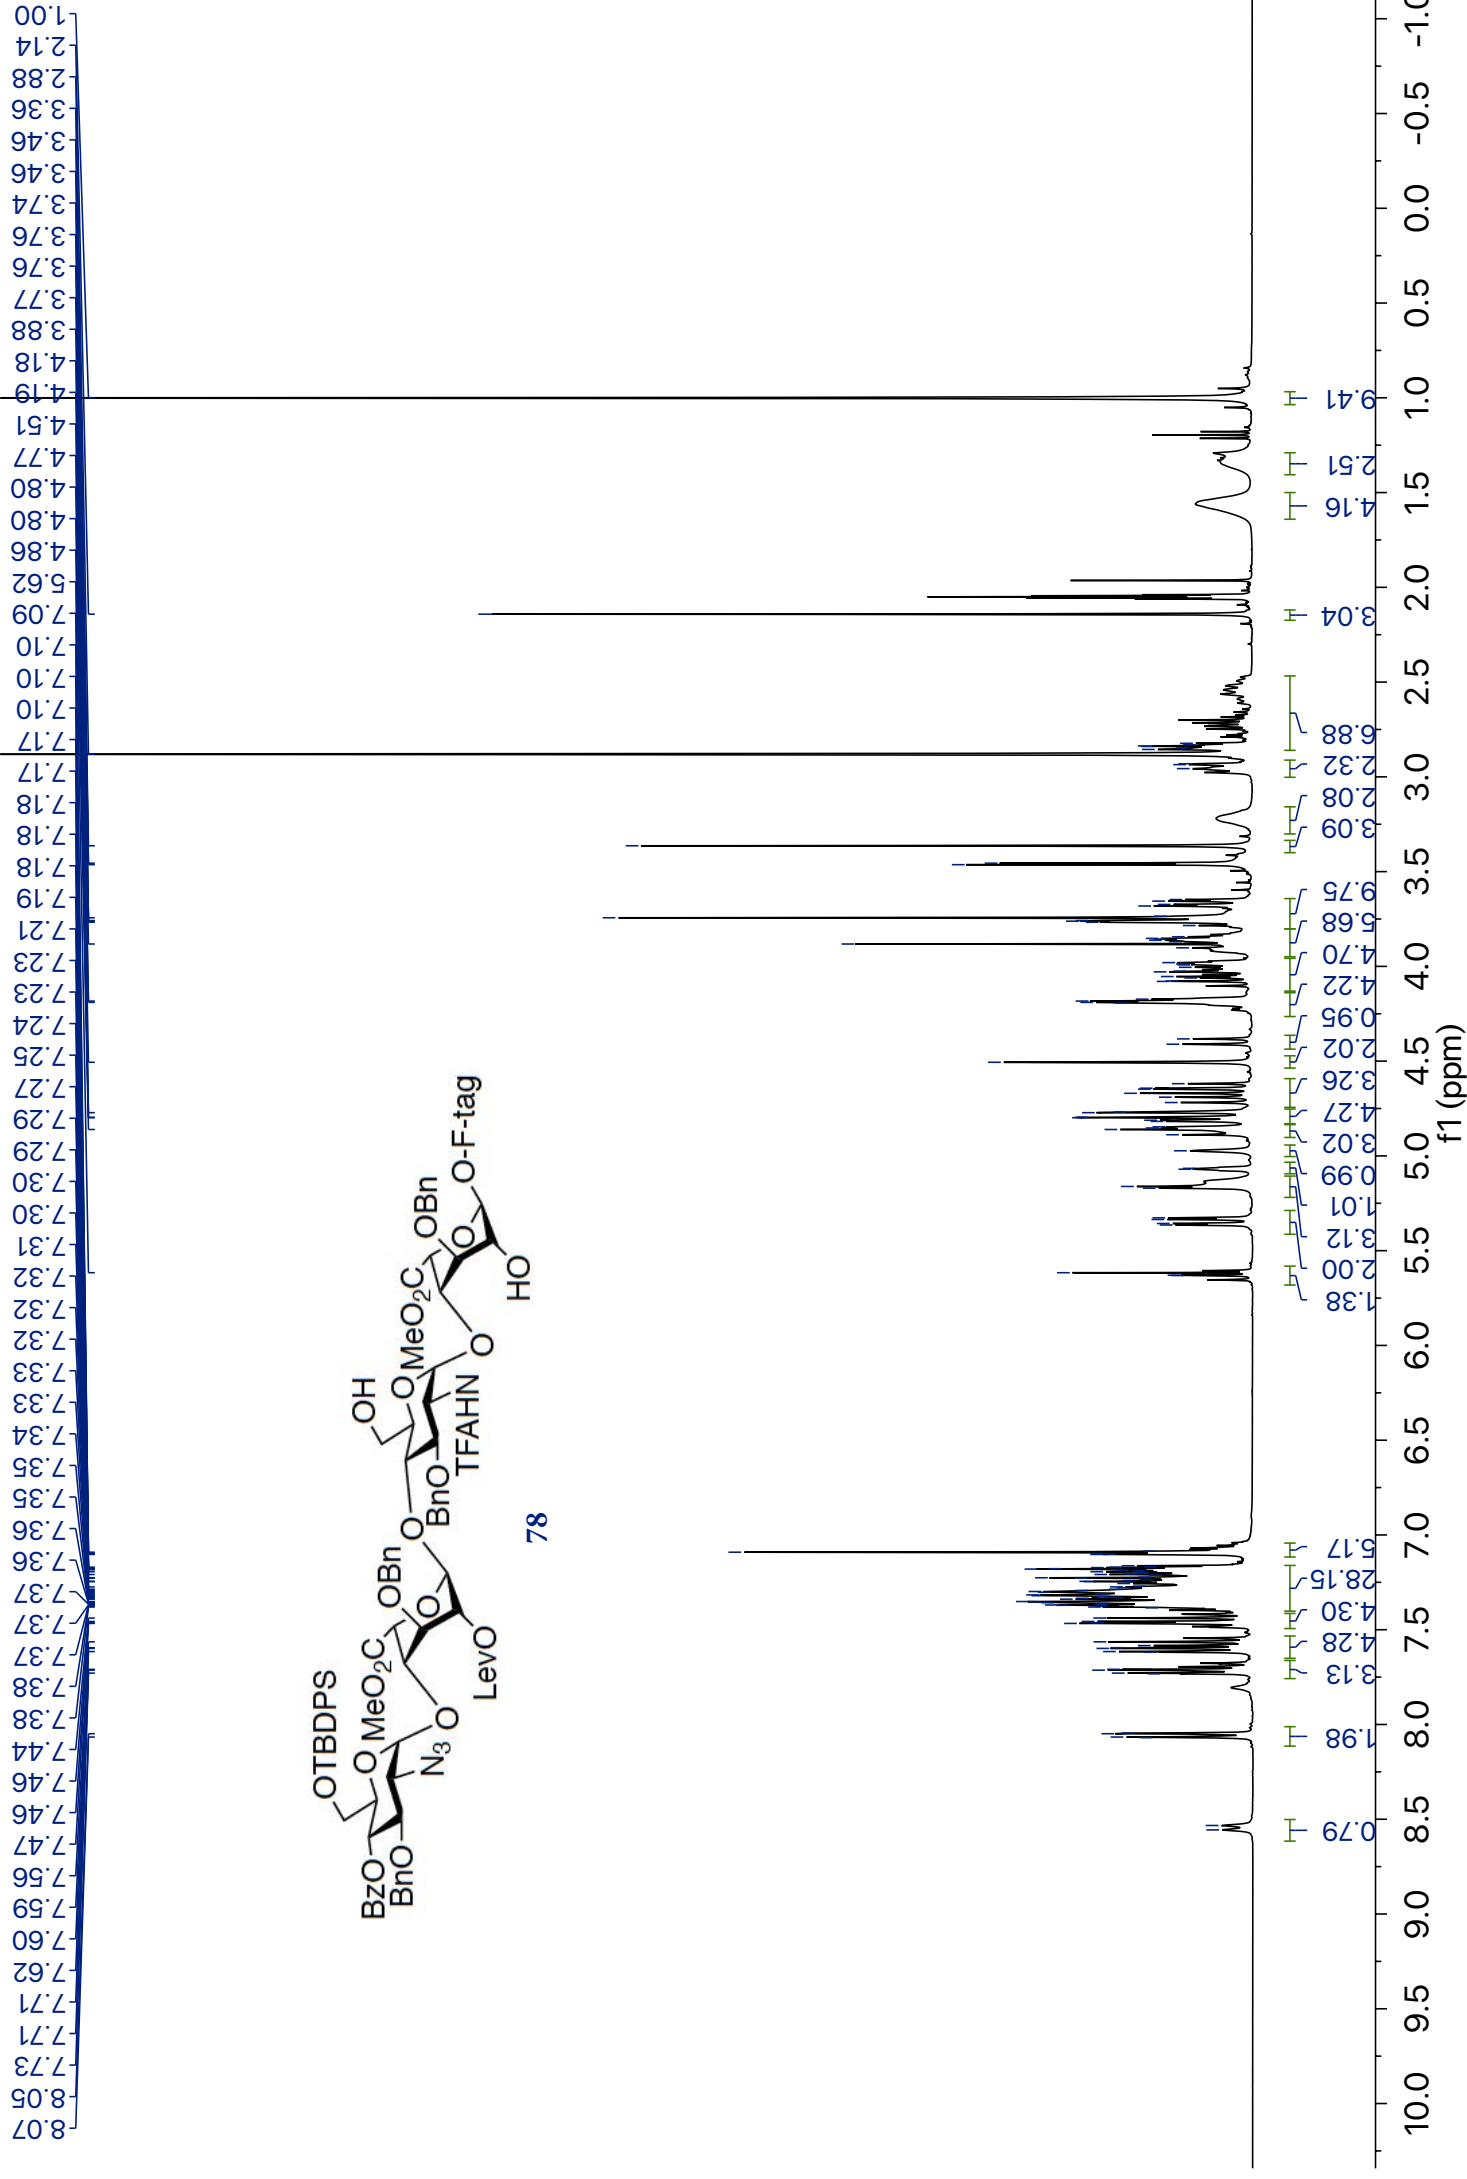

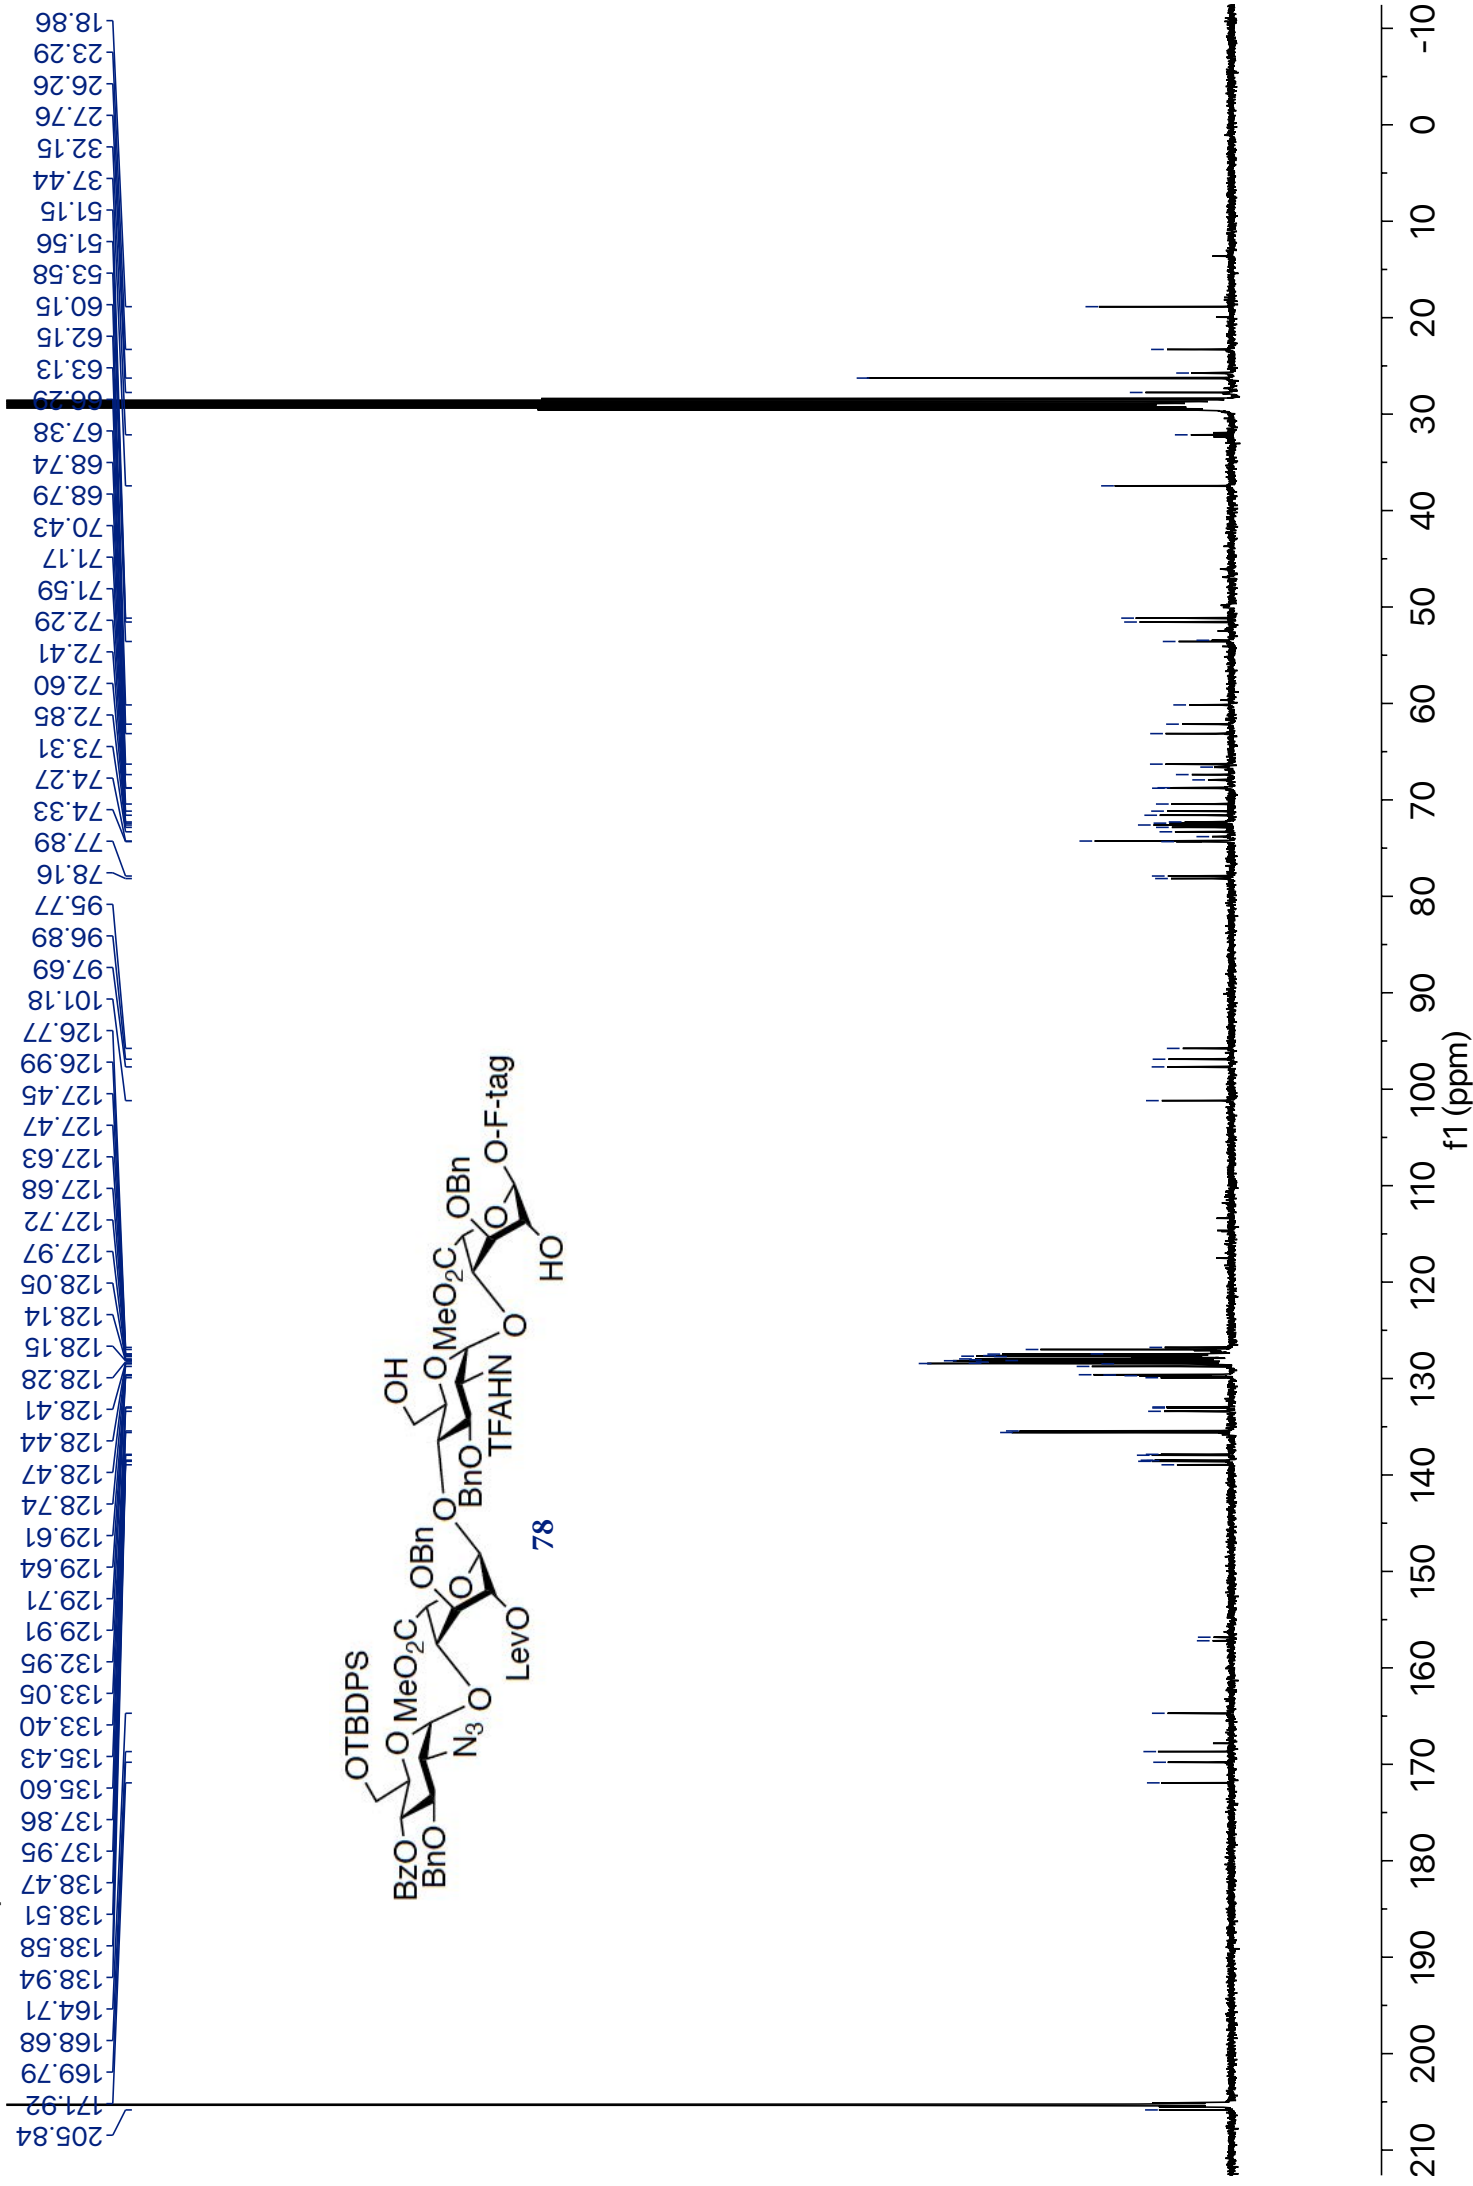



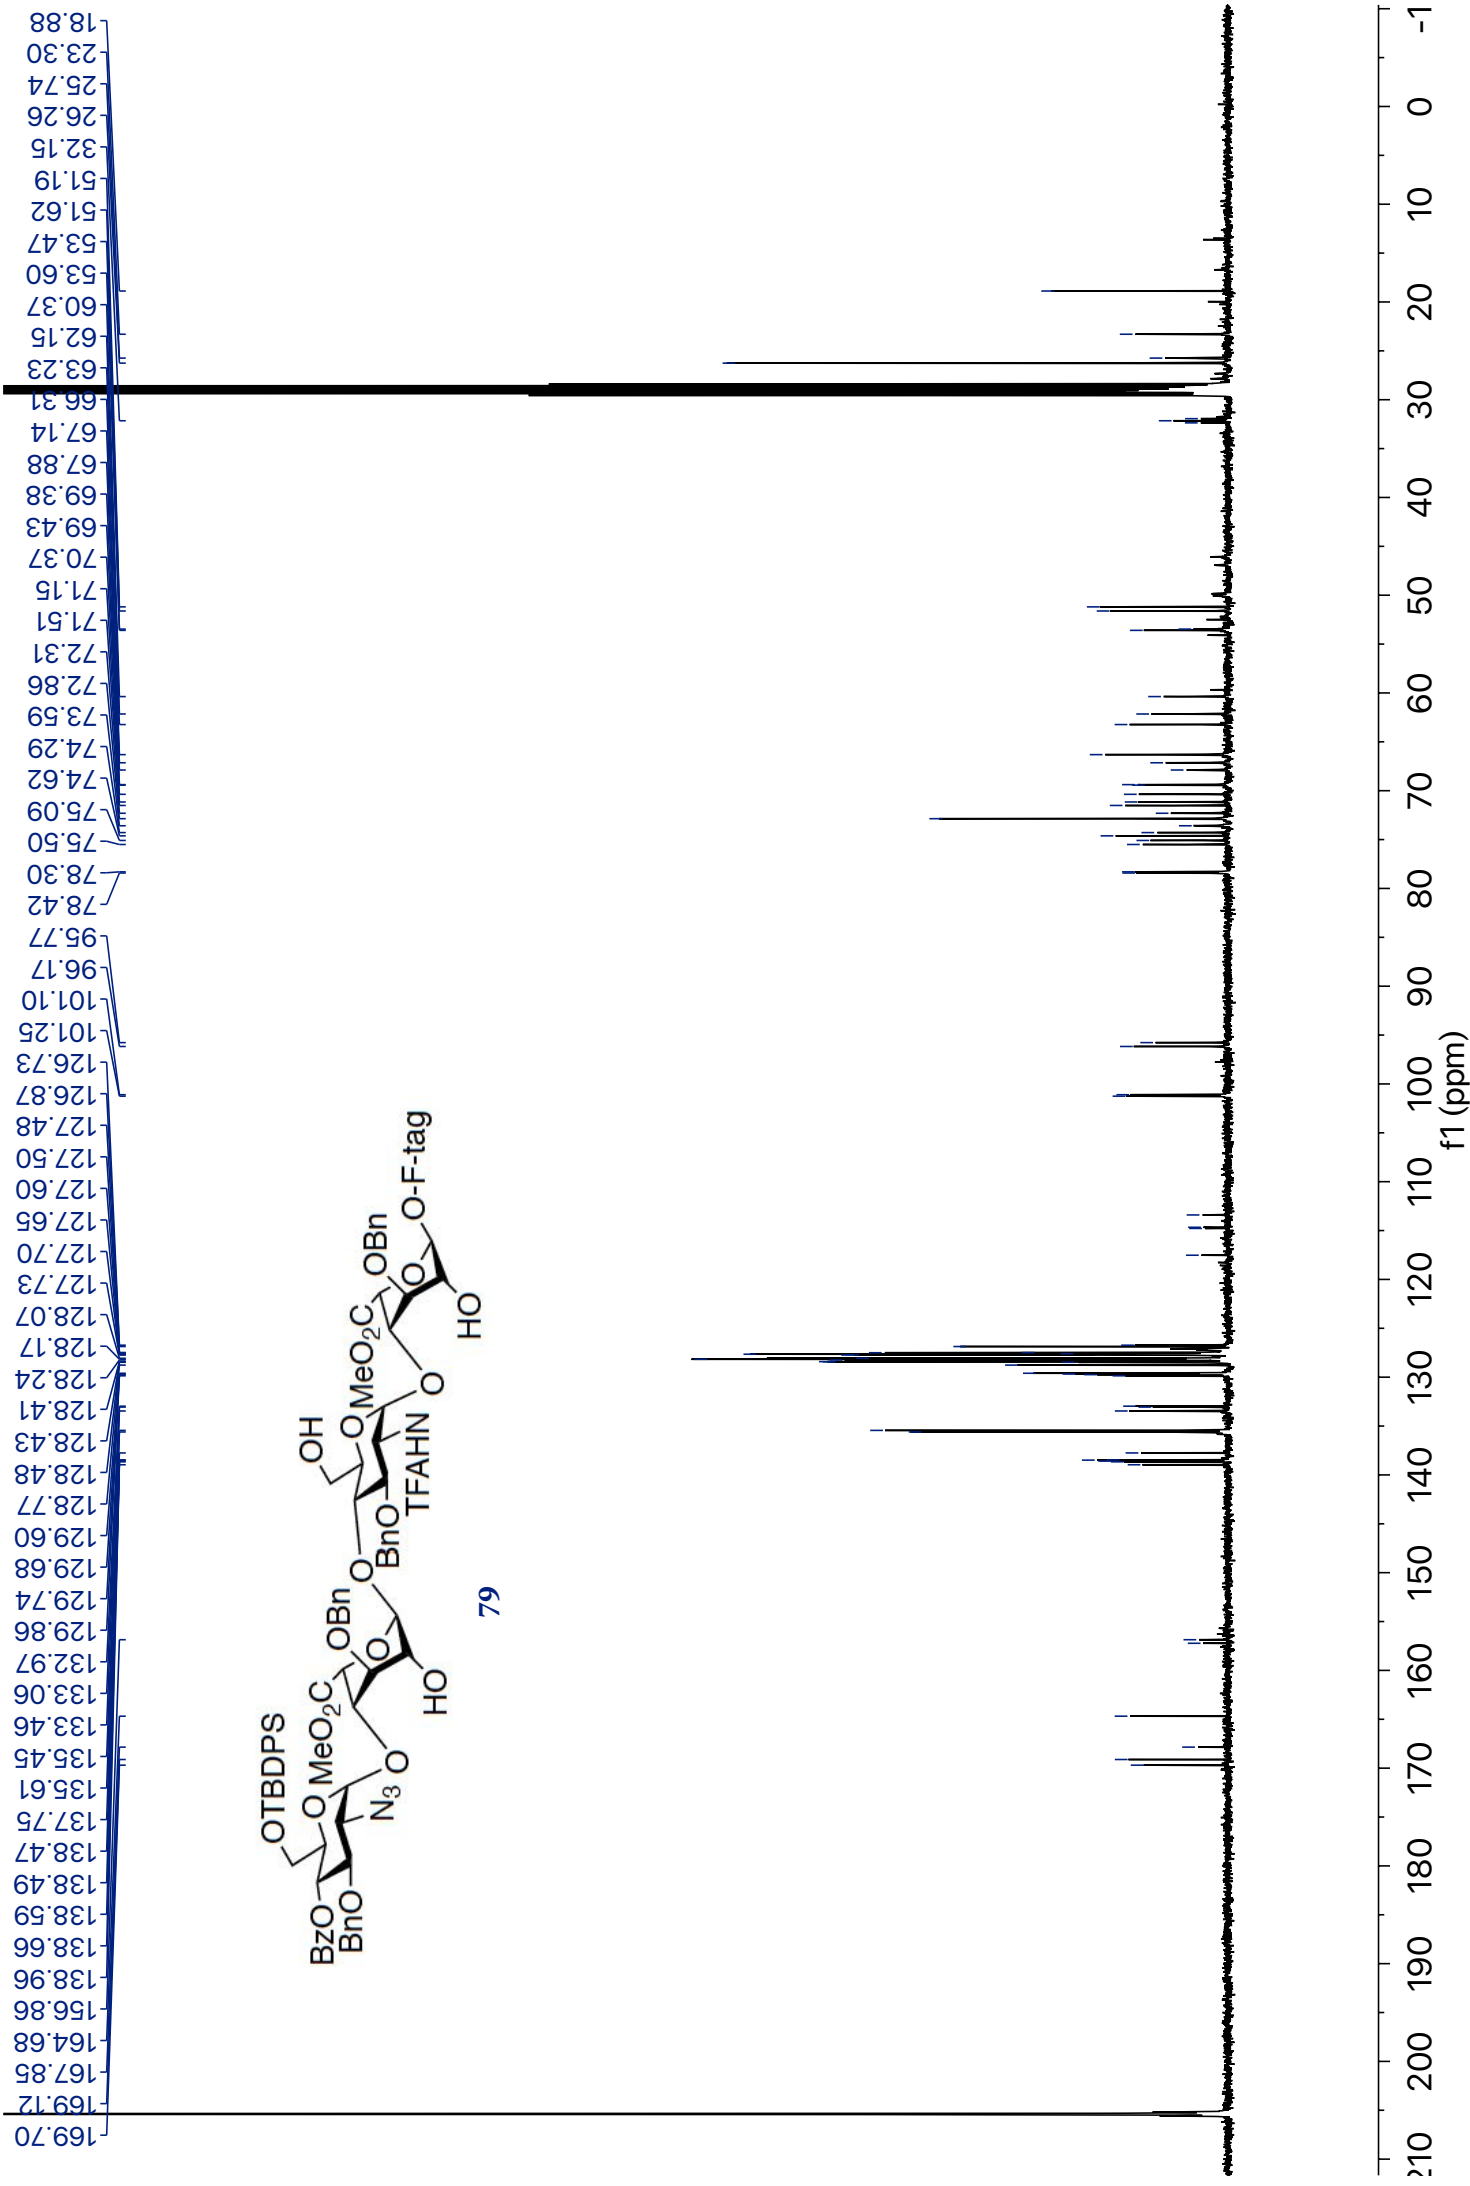





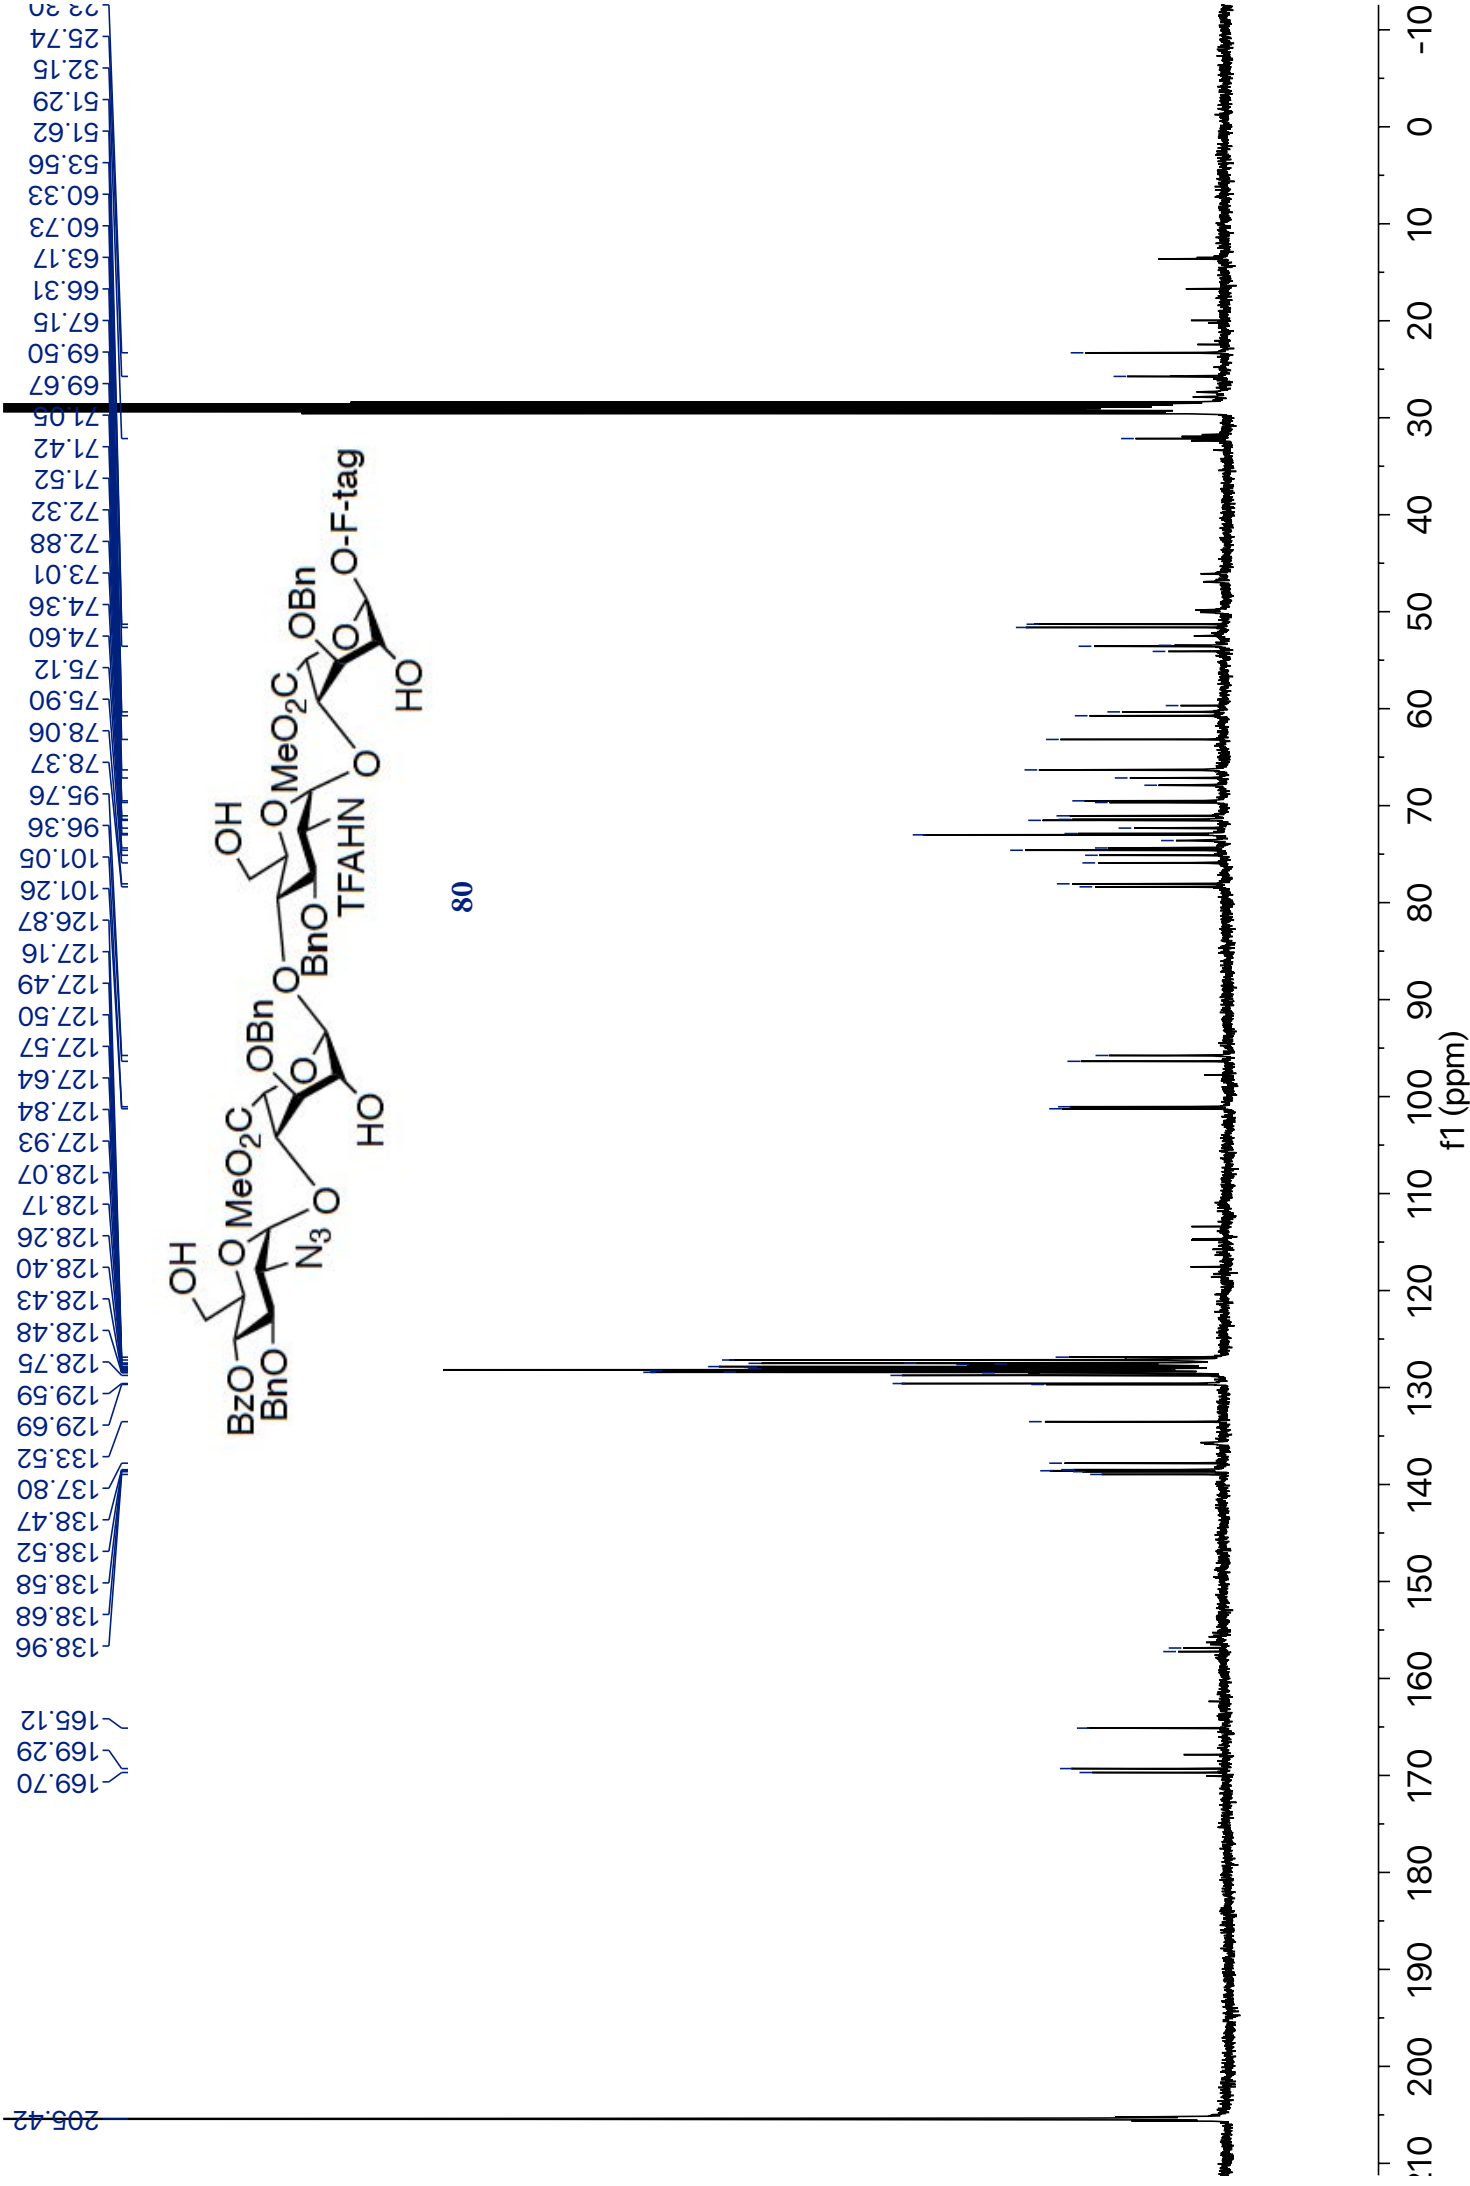

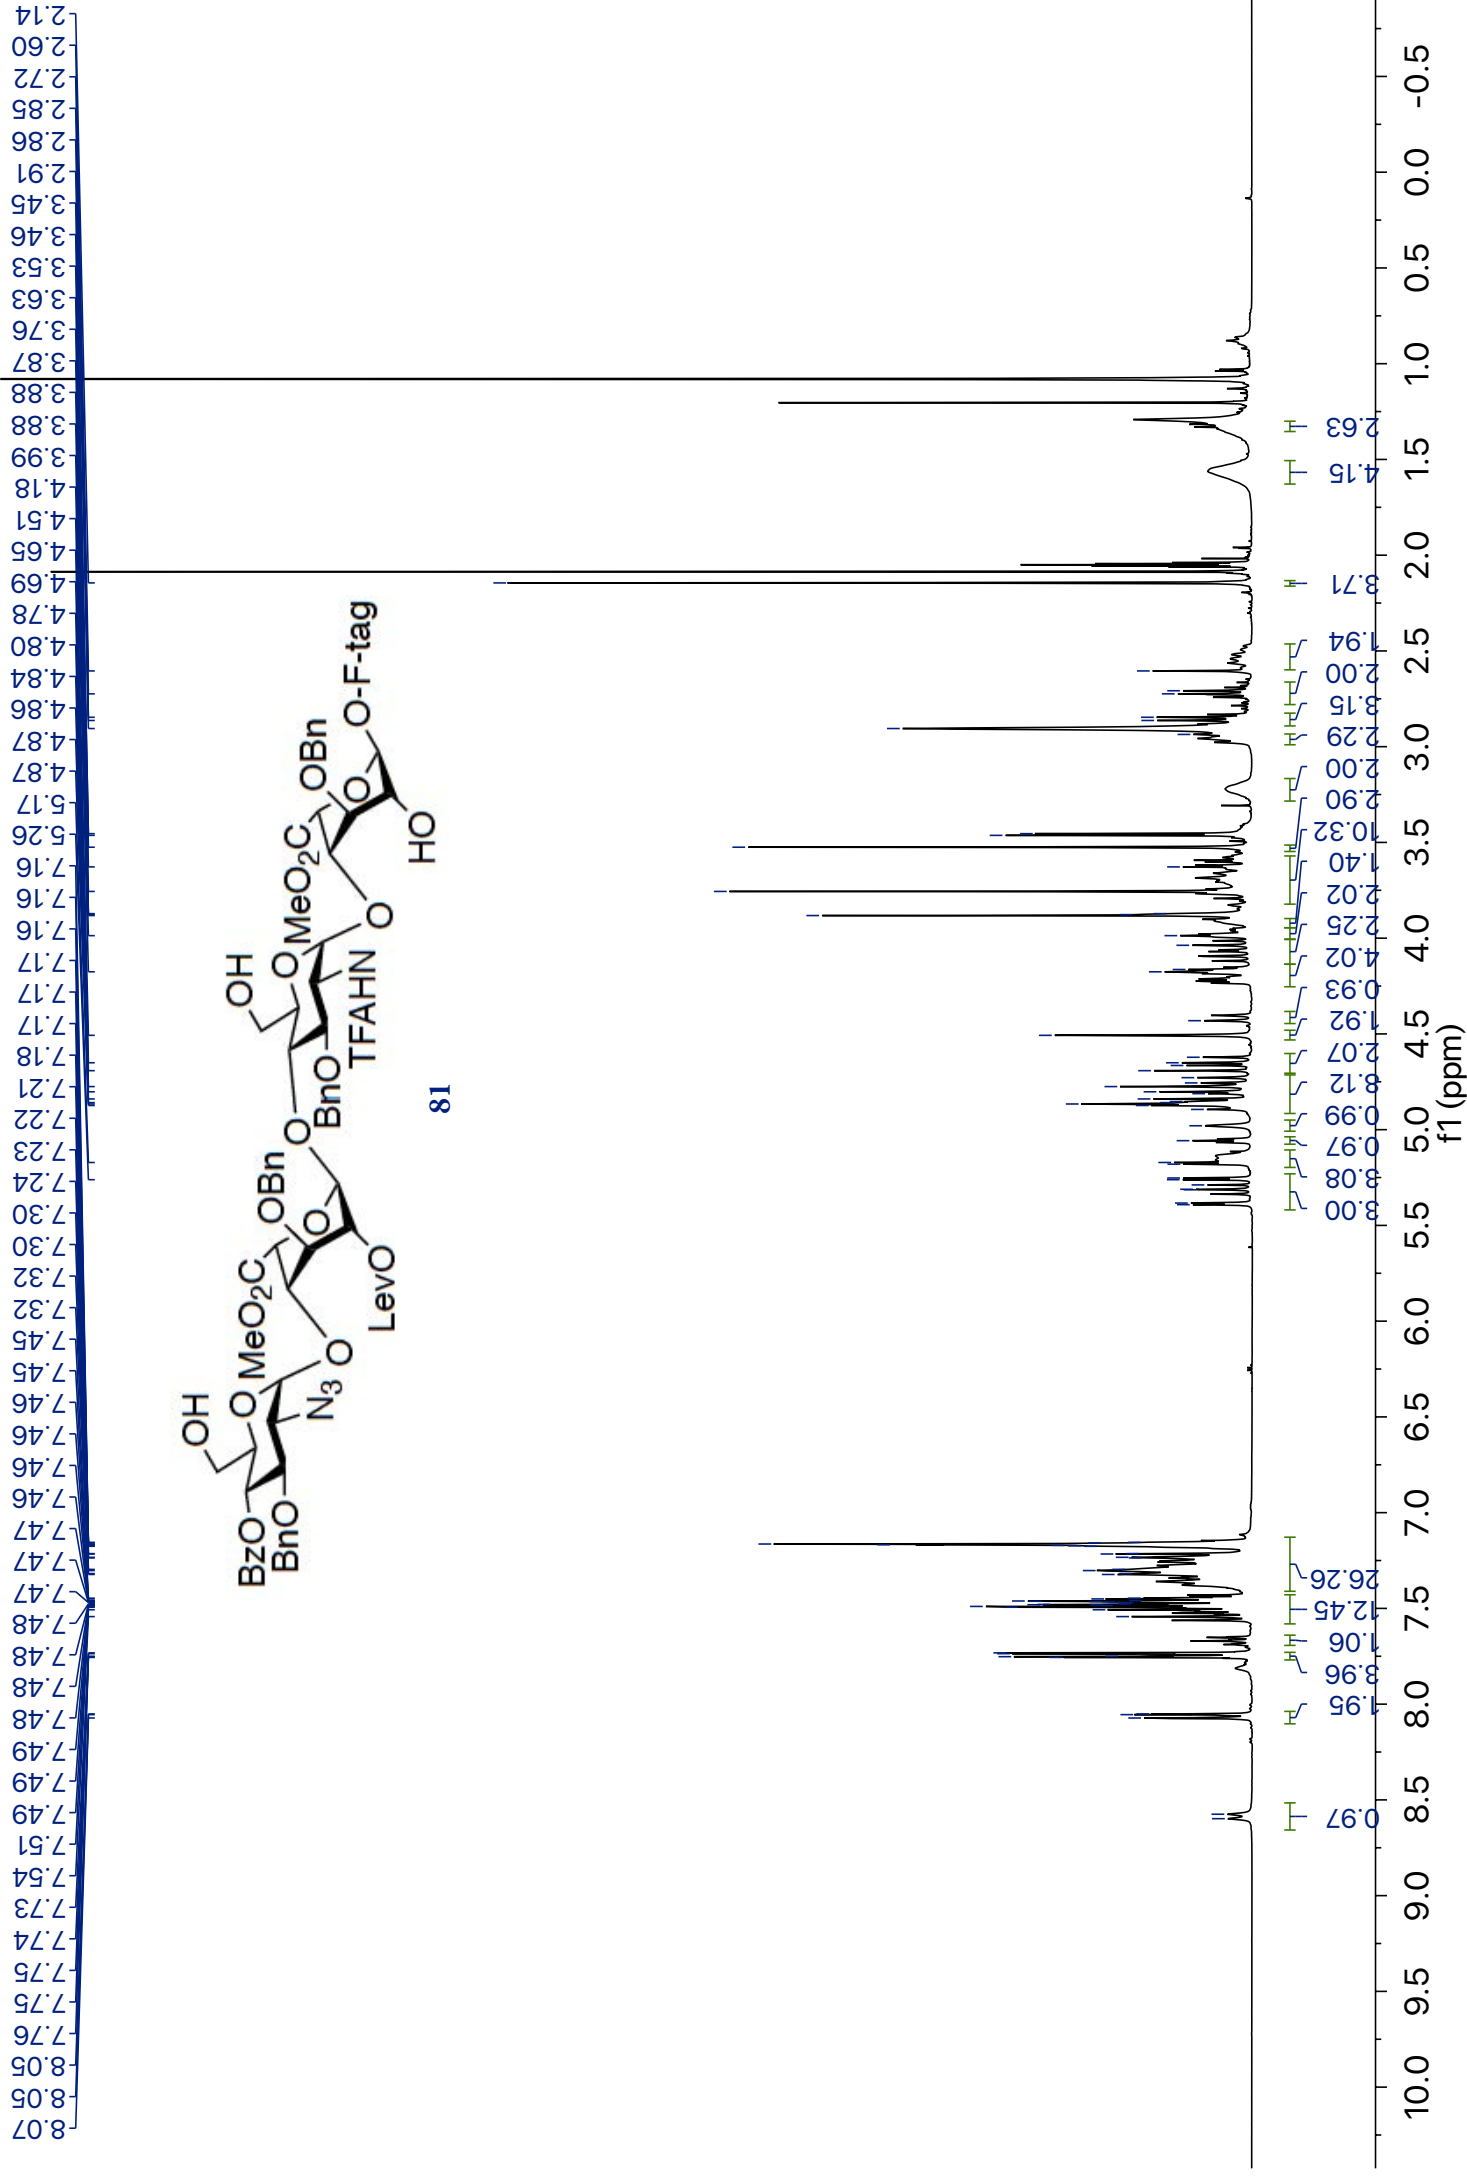

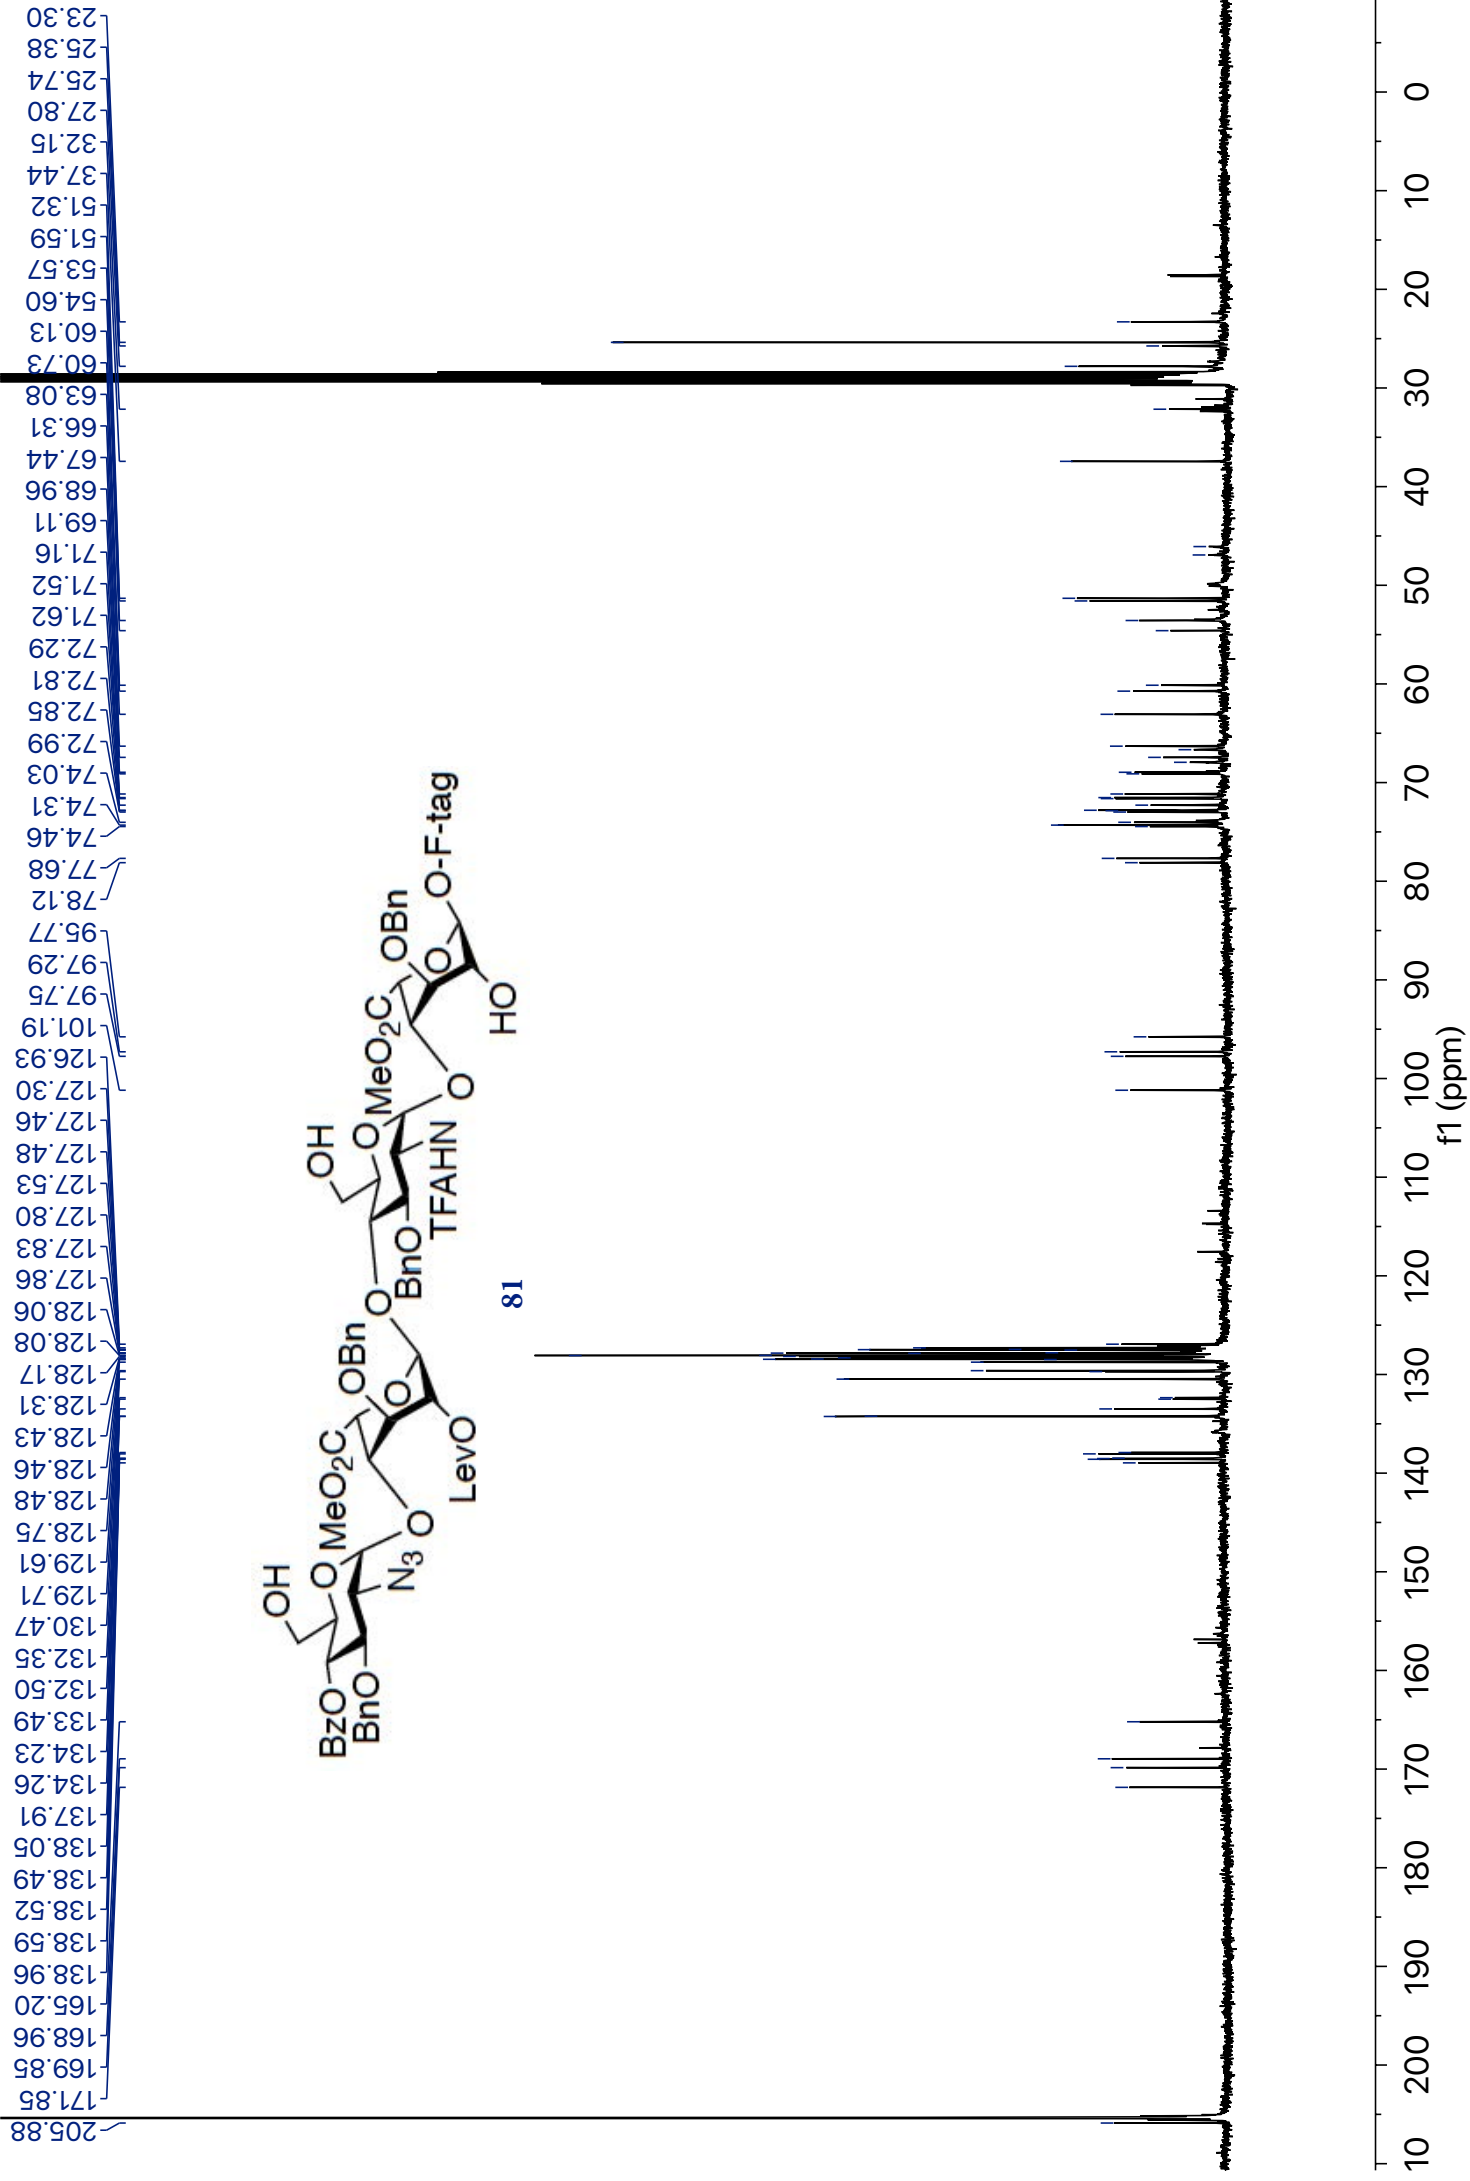

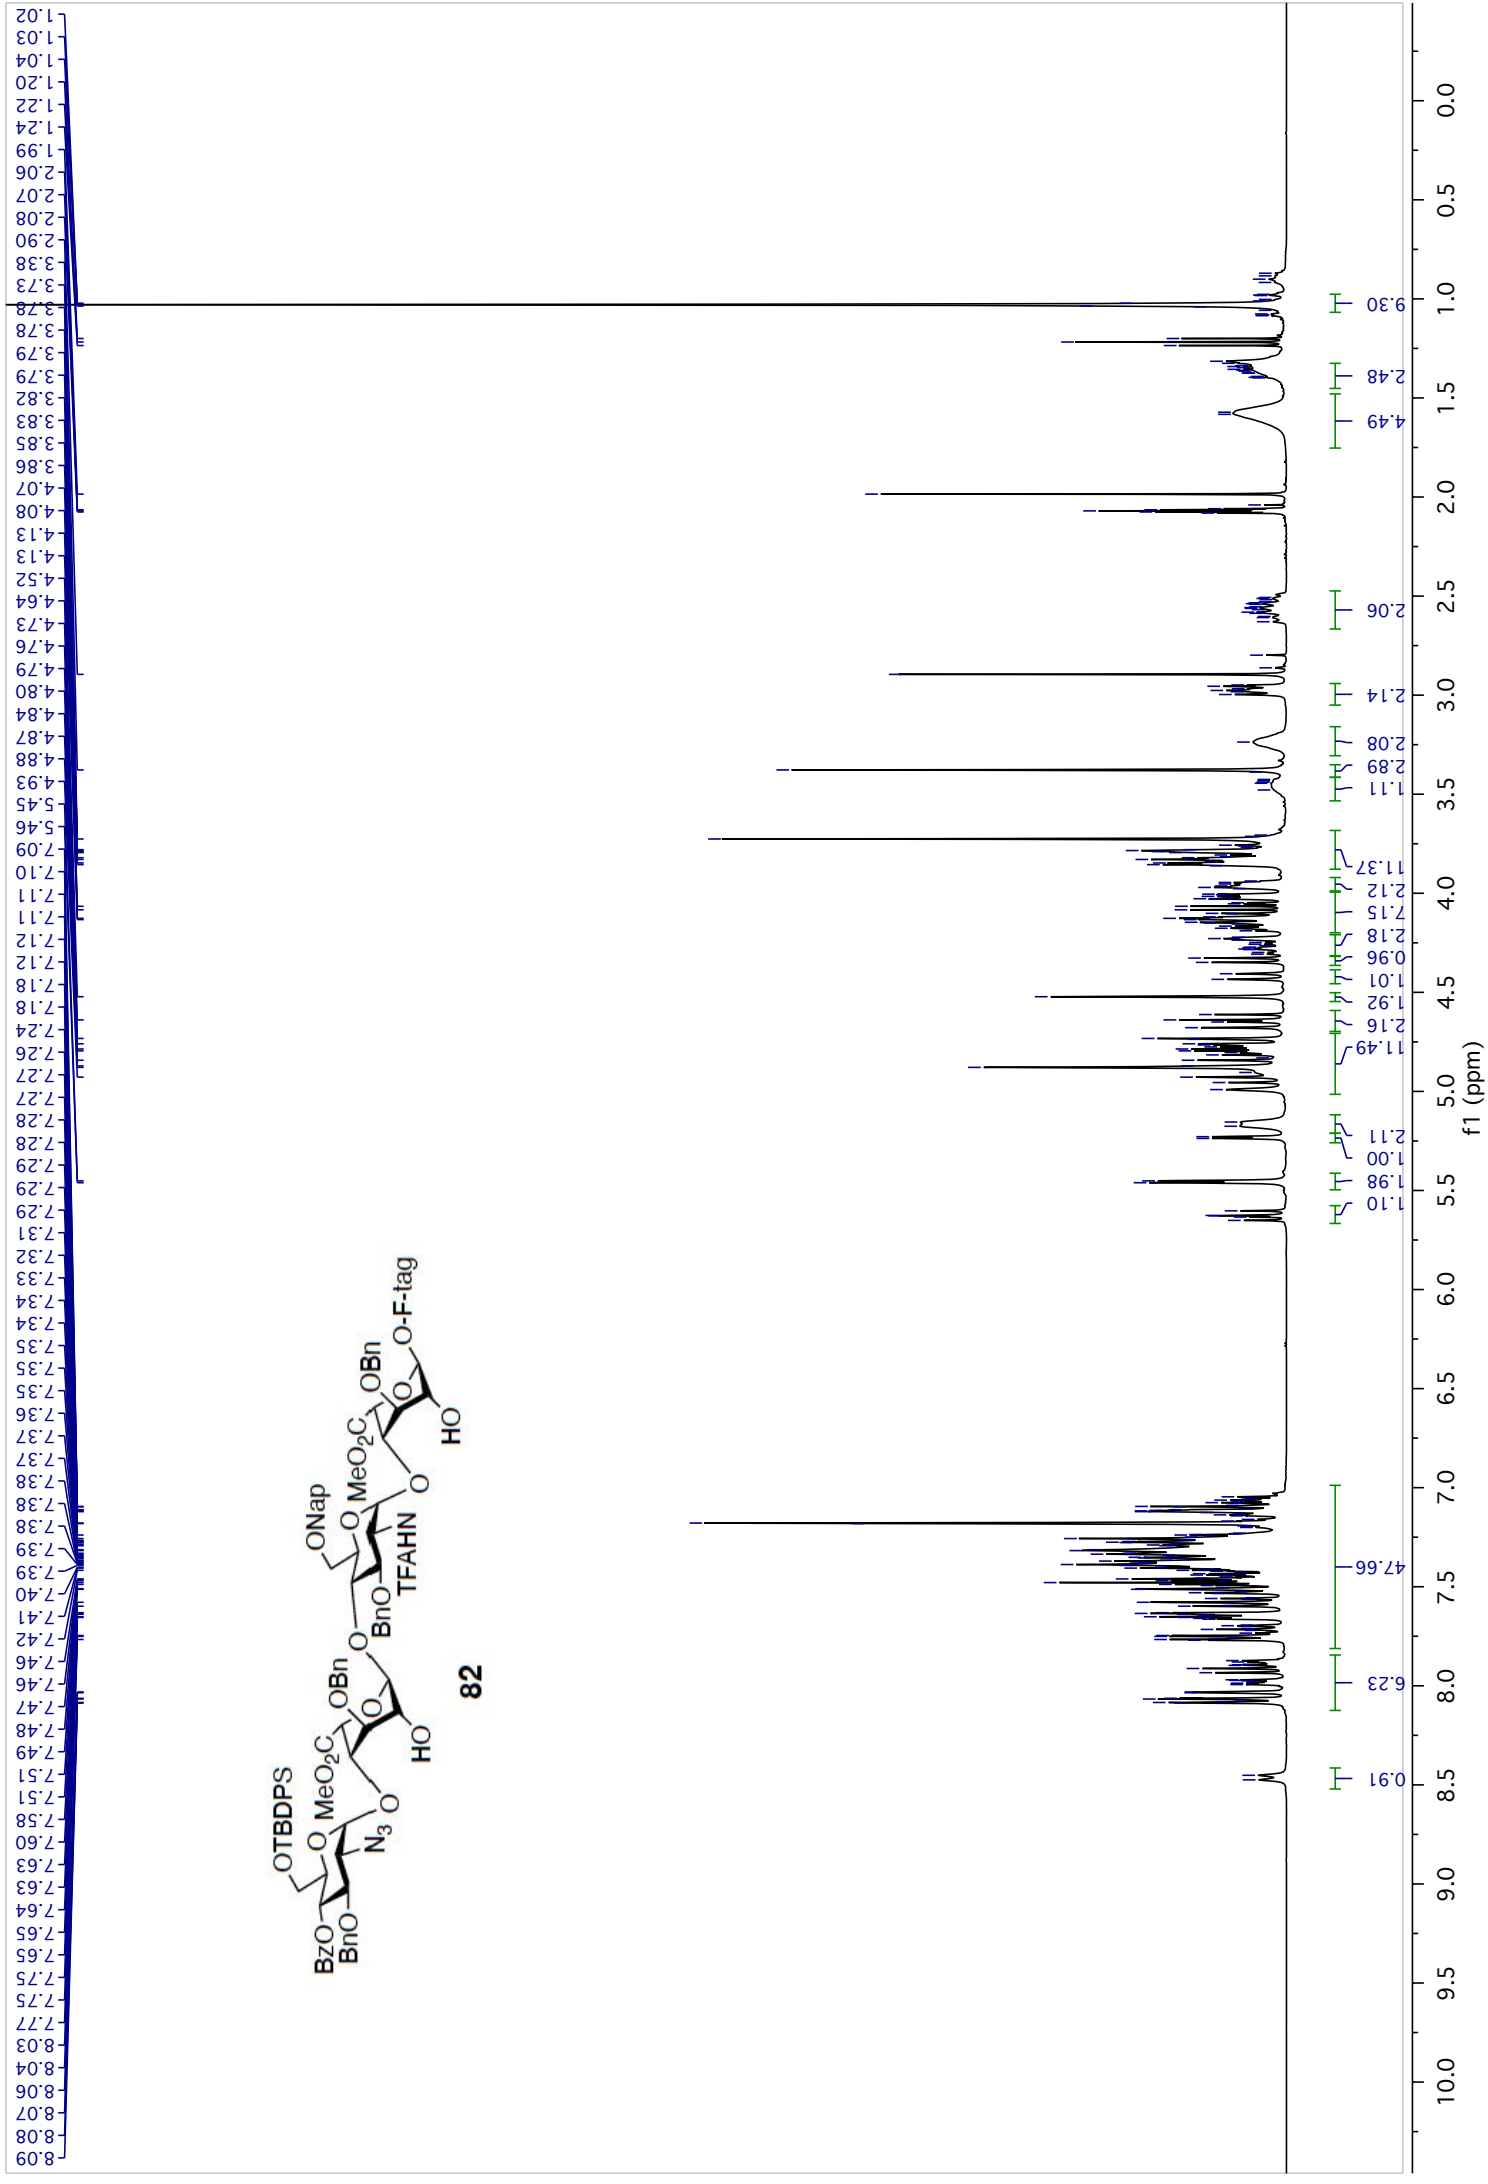



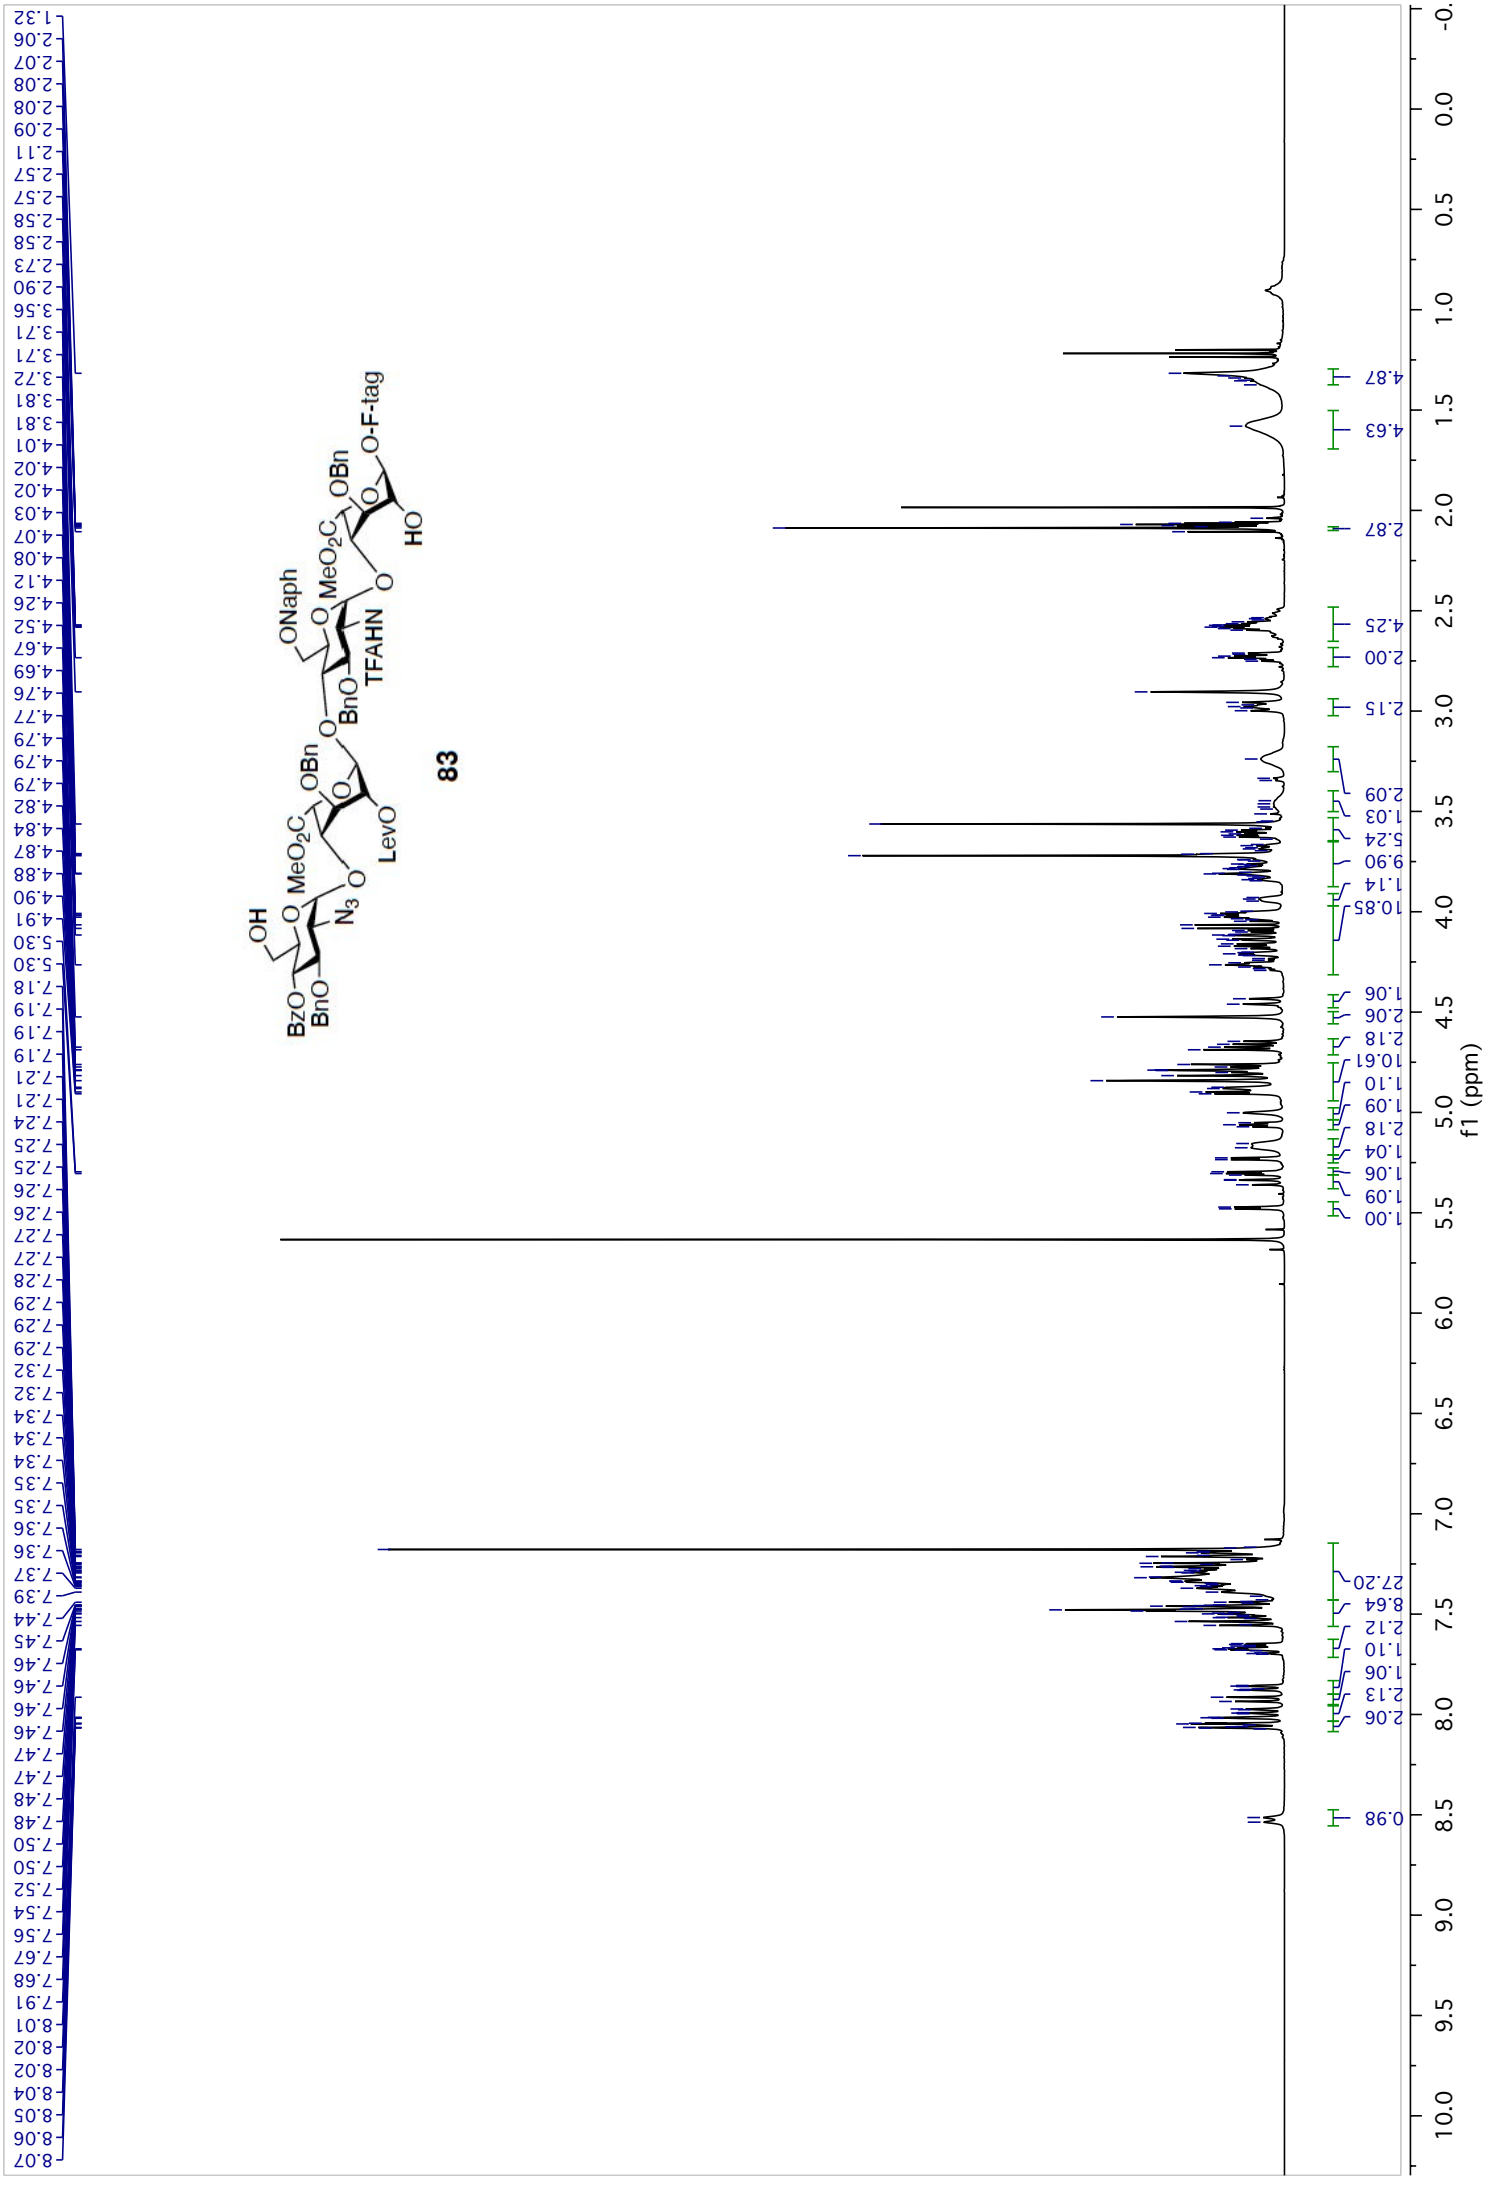

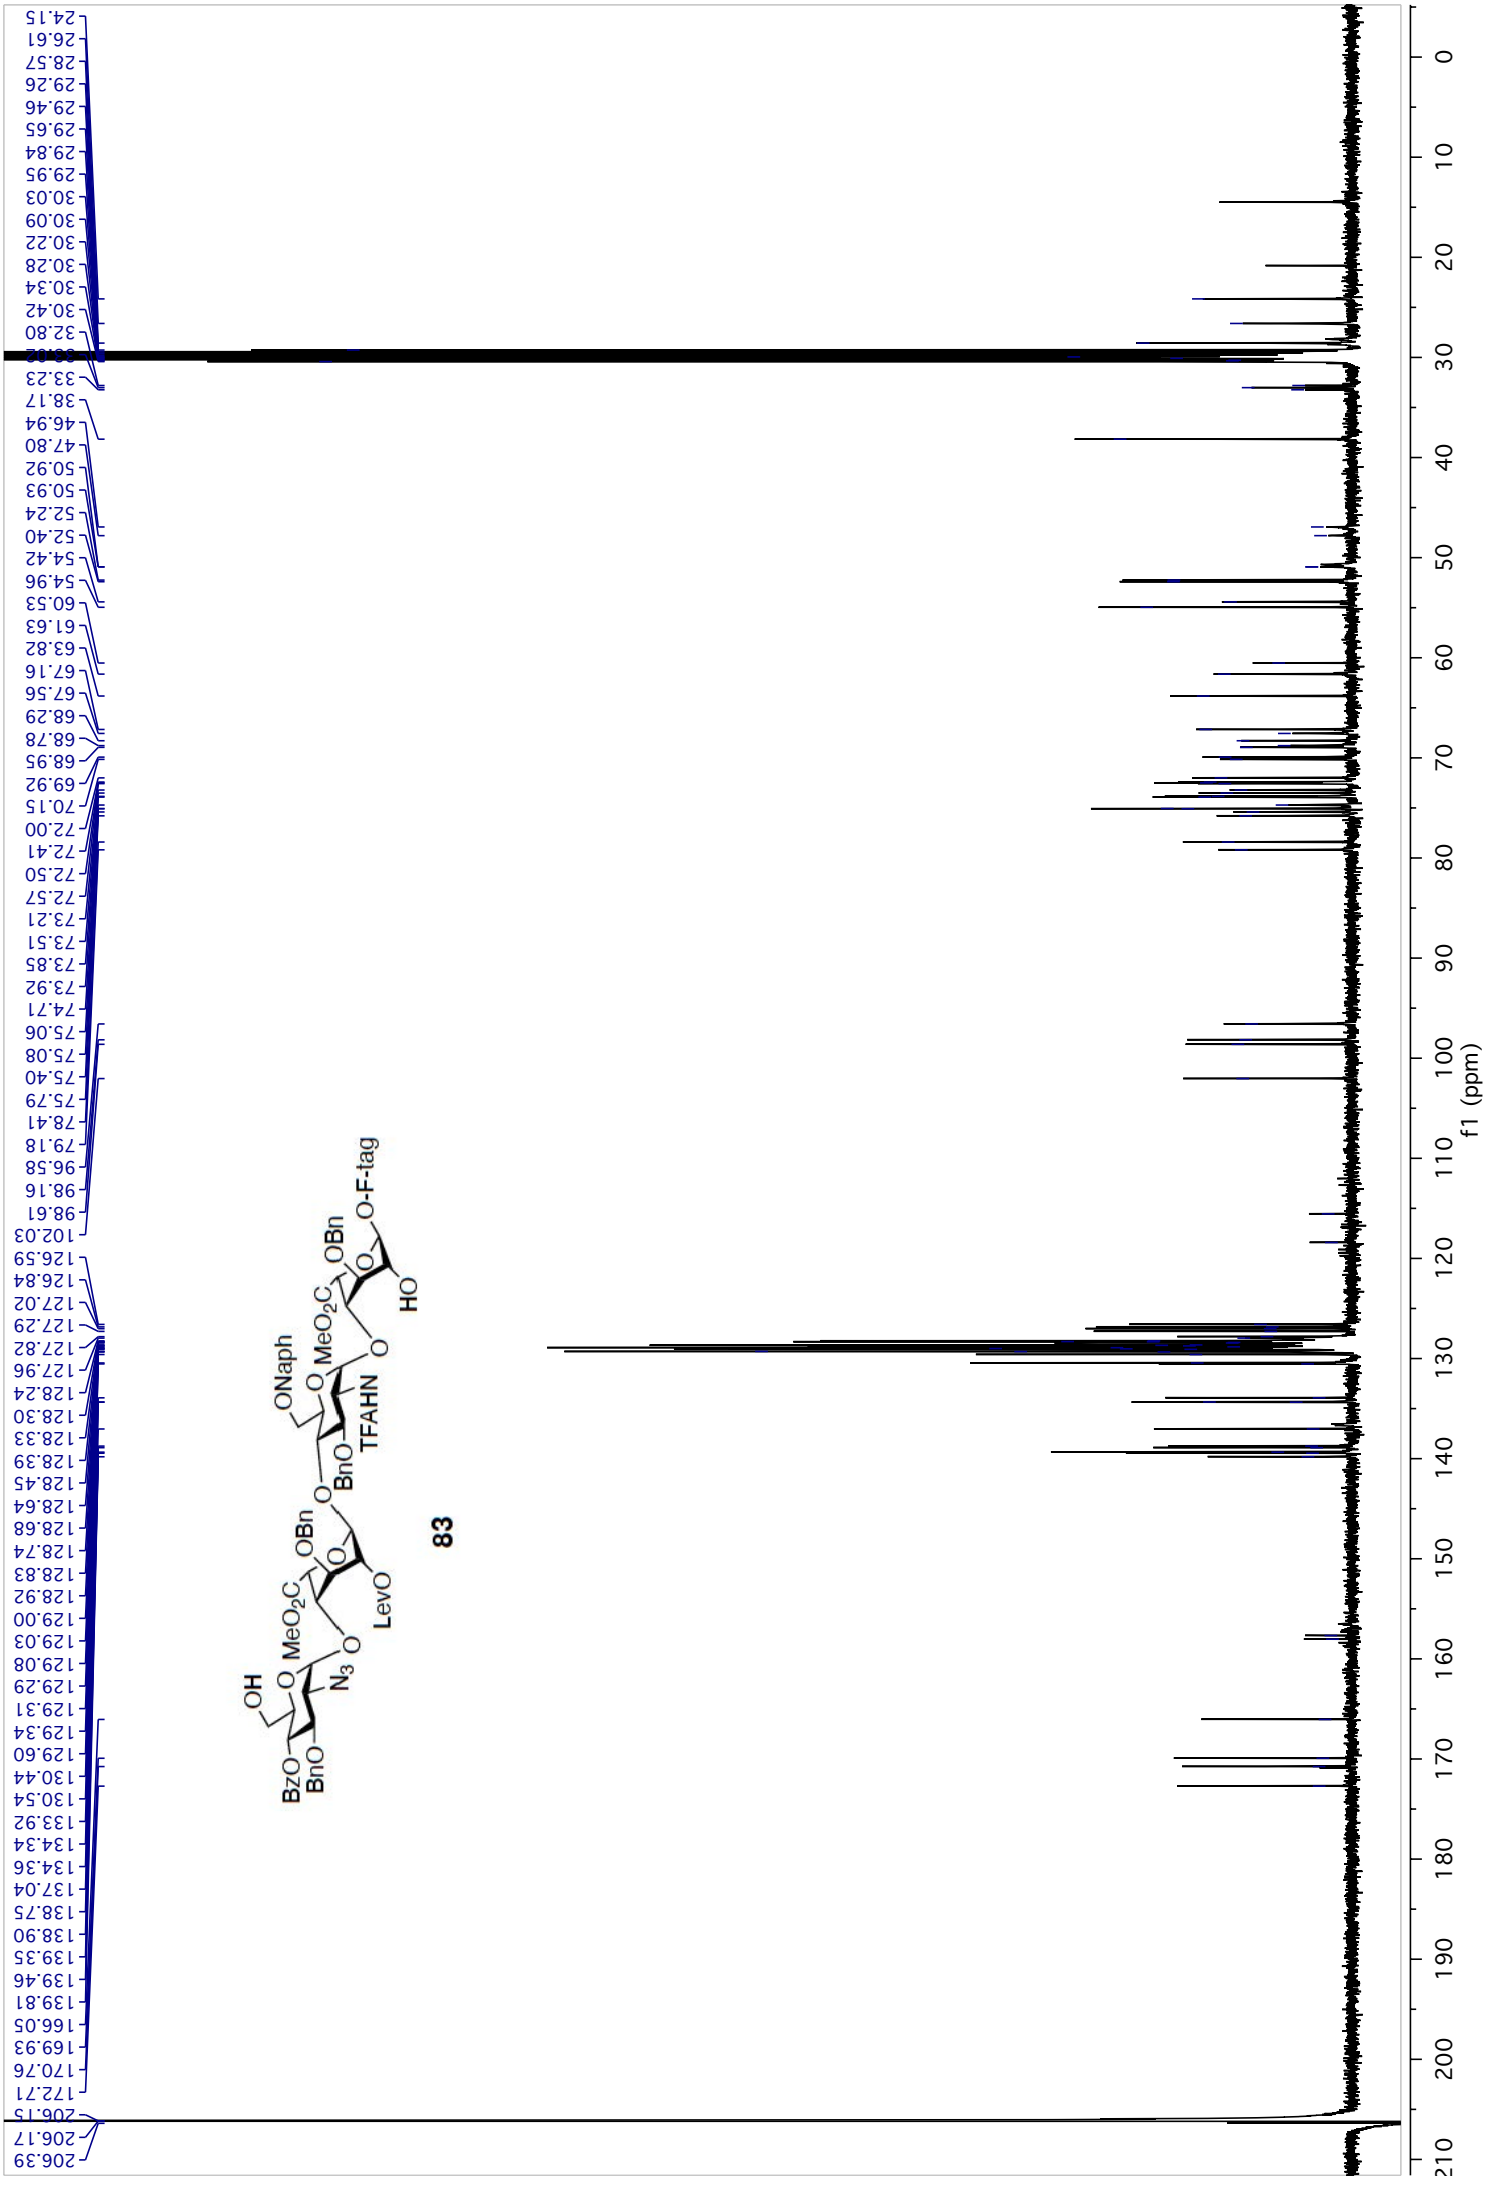



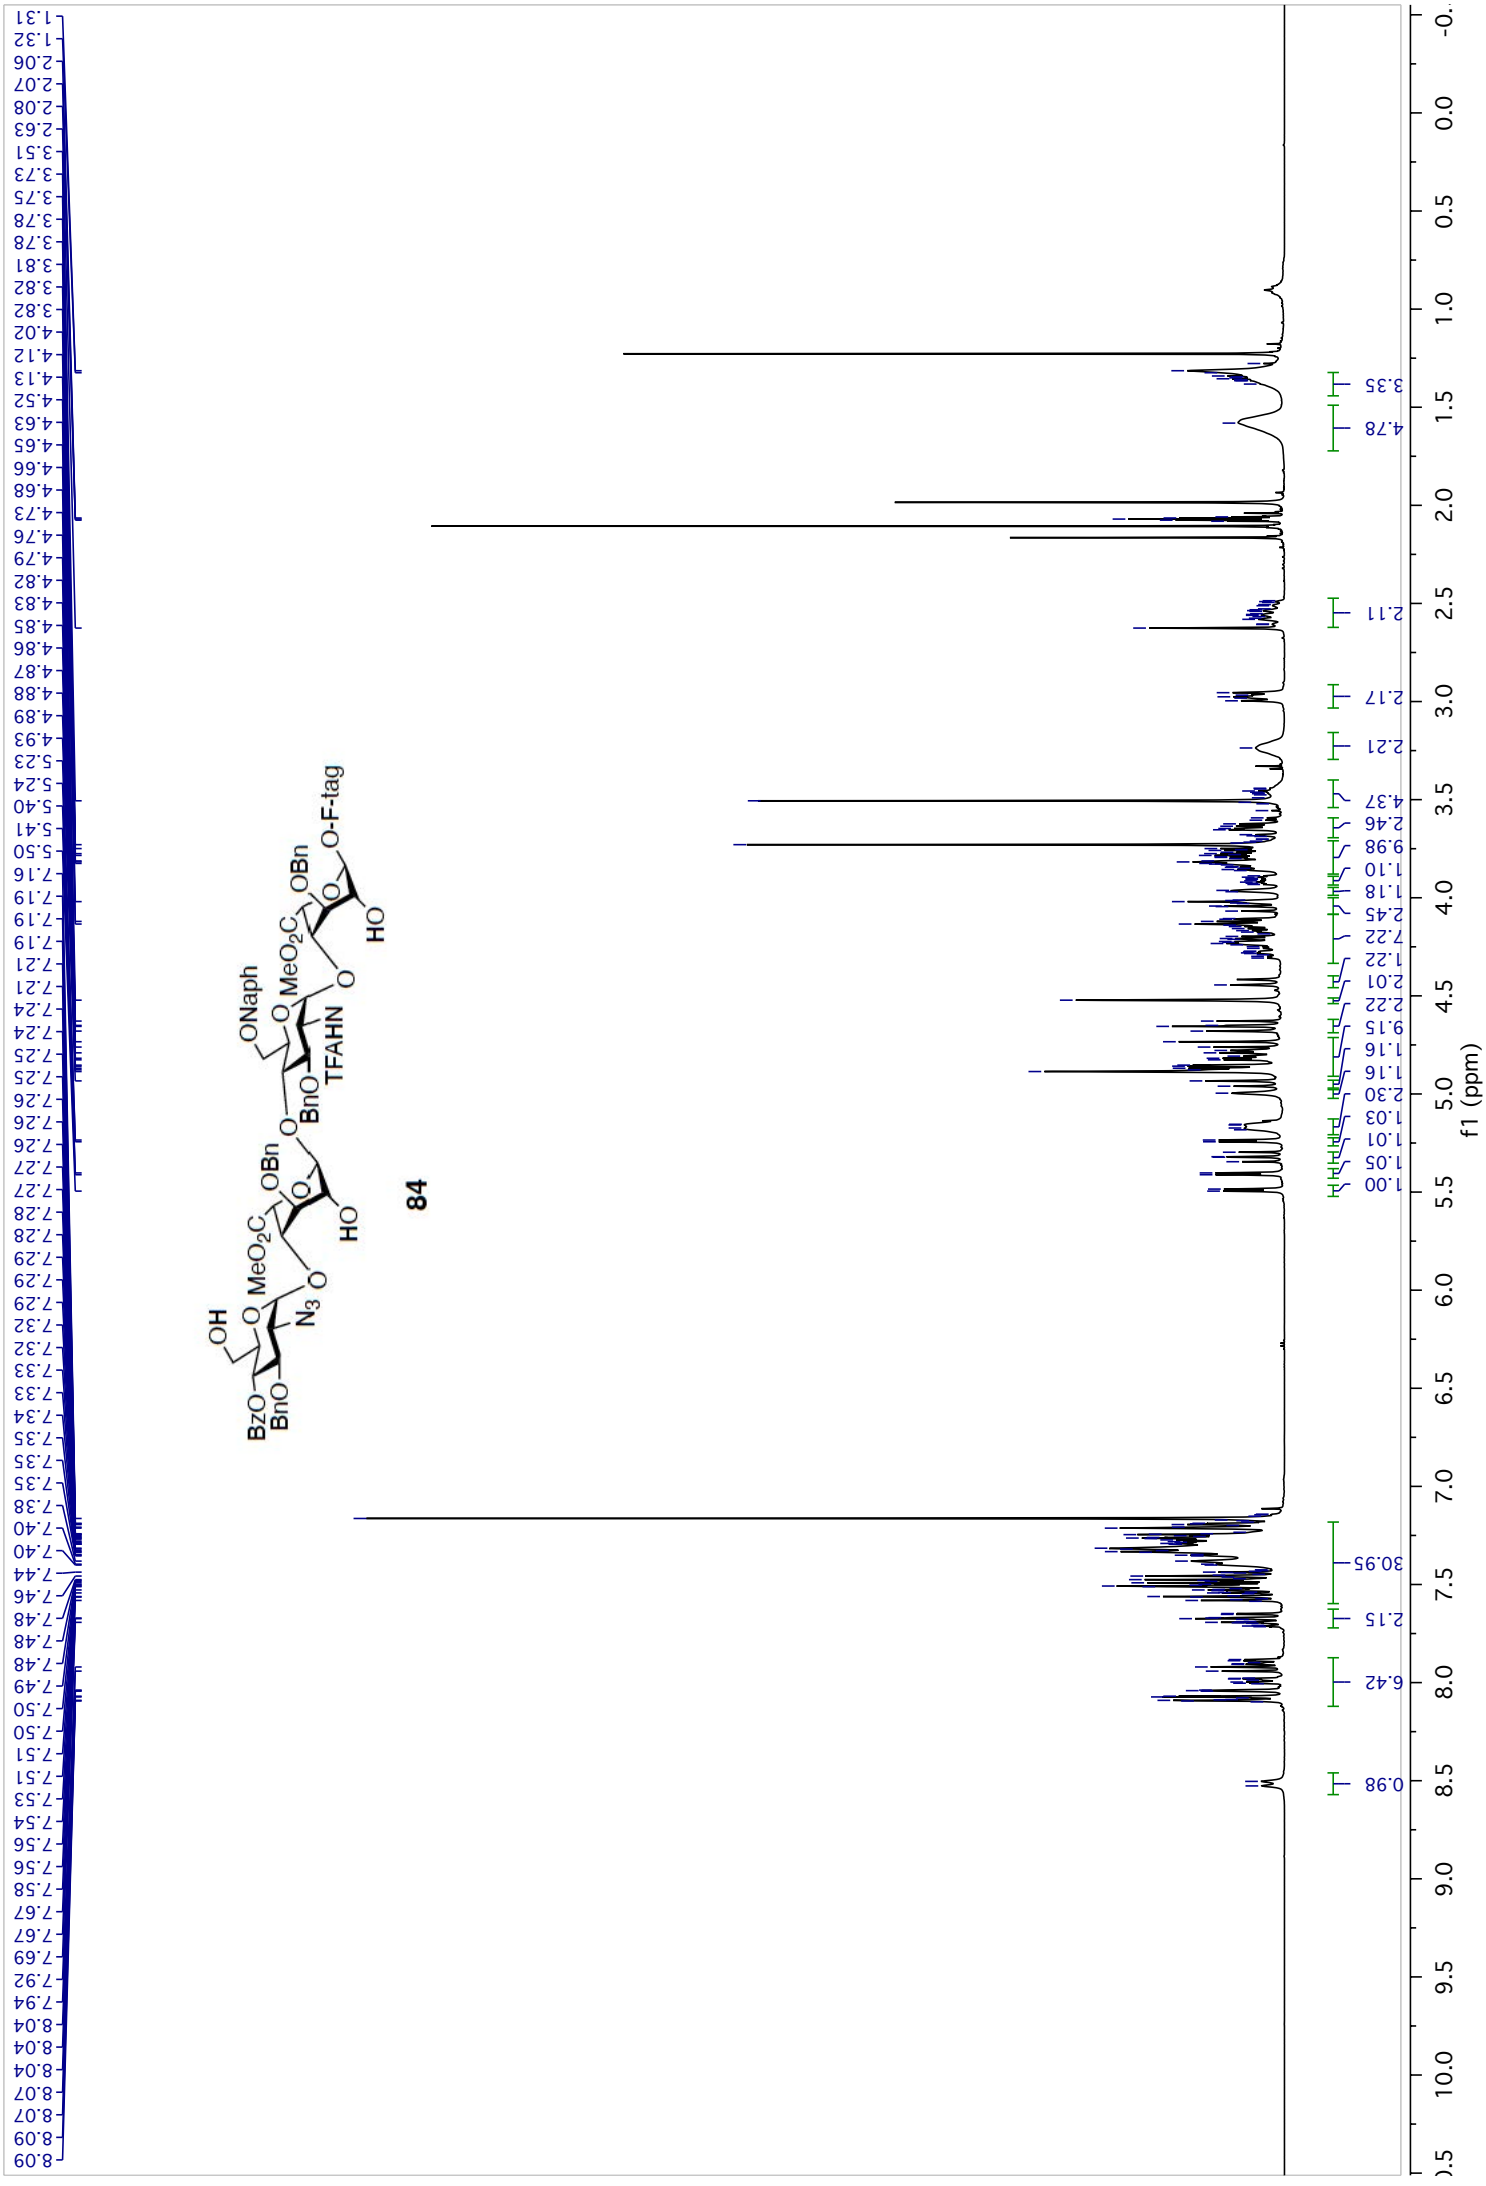

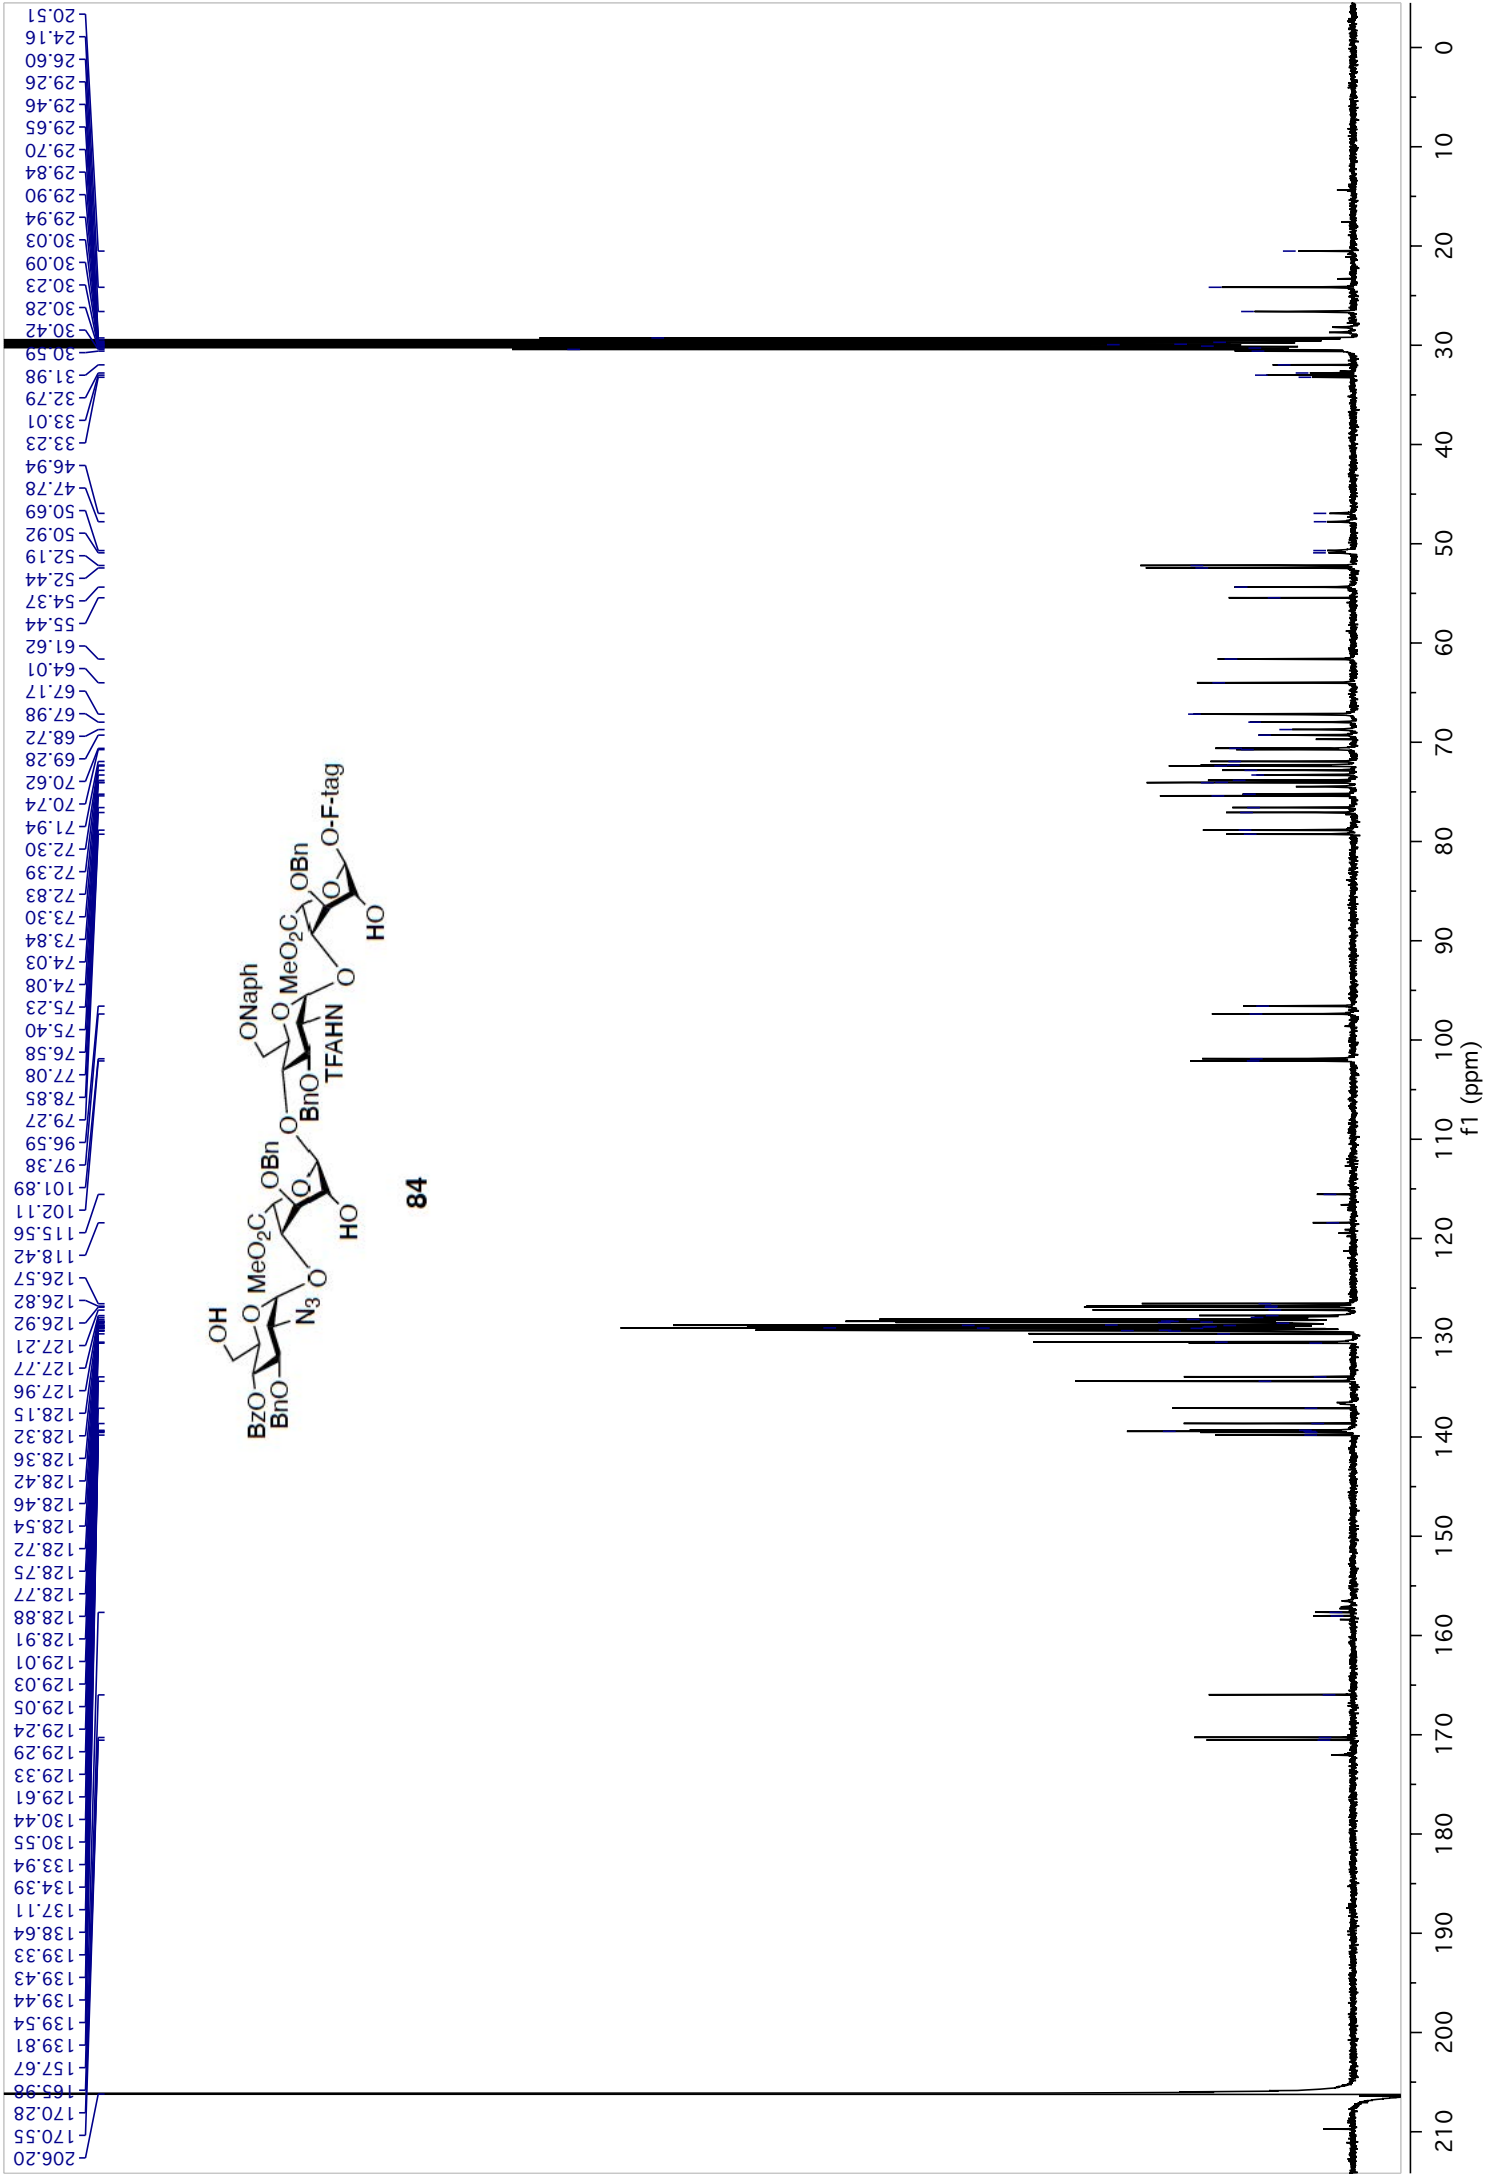

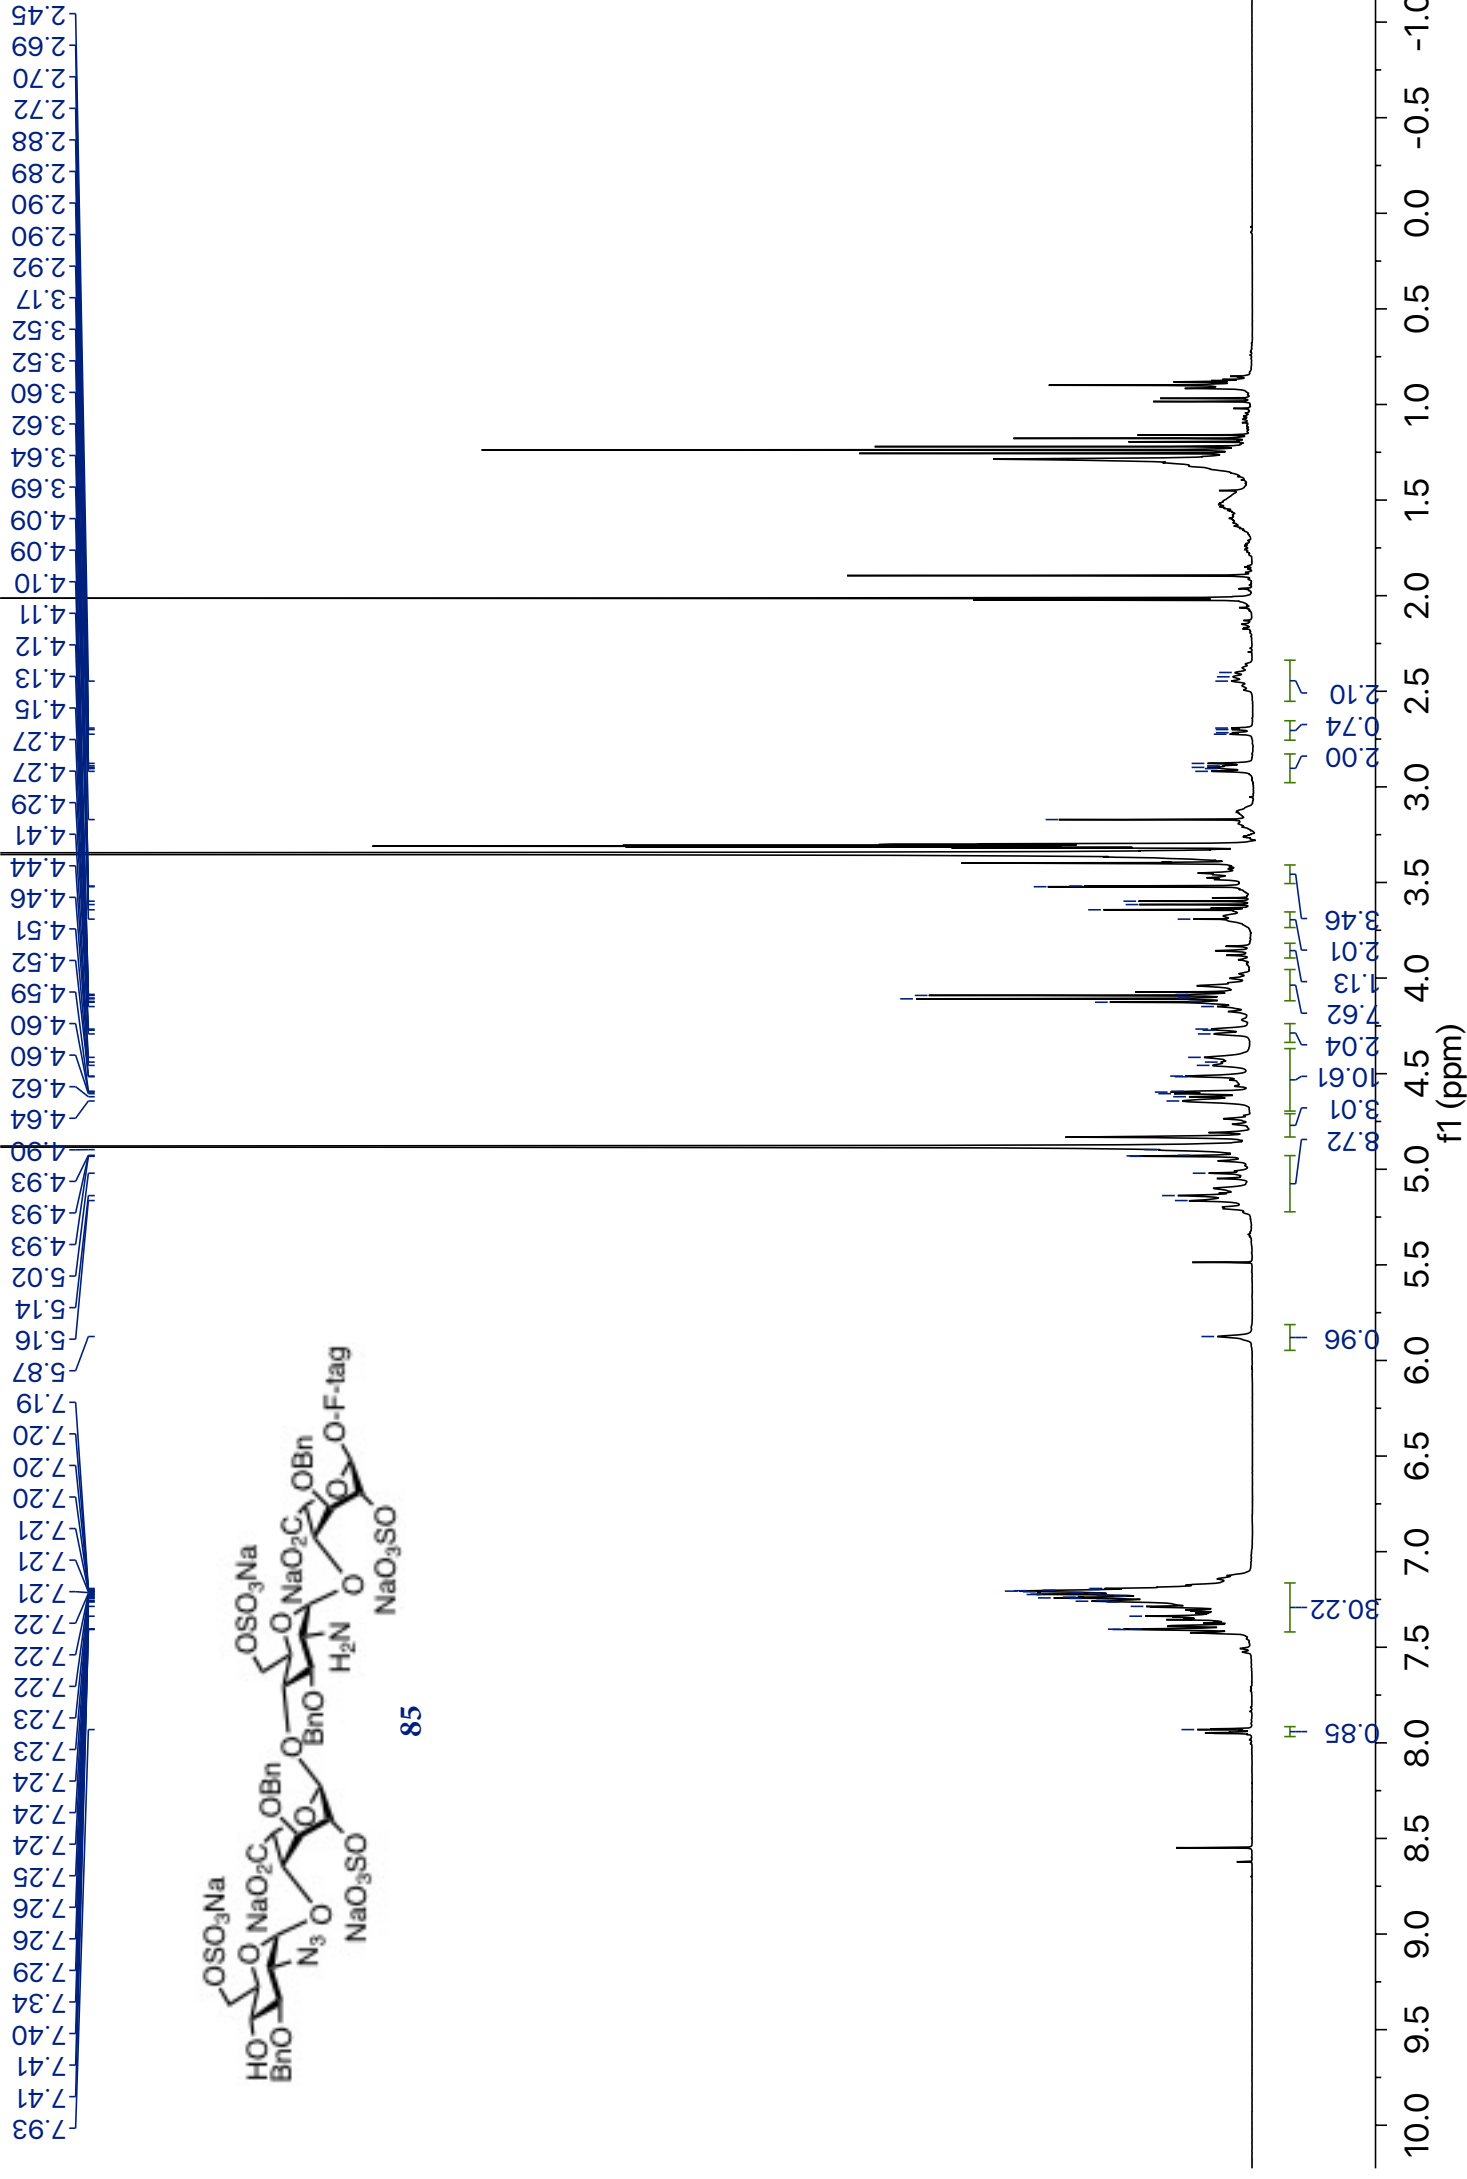

WL-2-300-D6S-C2S-B6S-A2S-LiOH.3.1.2rr

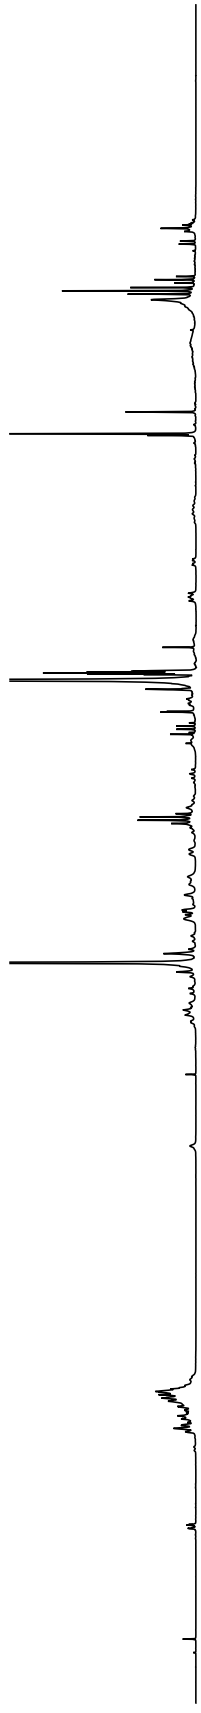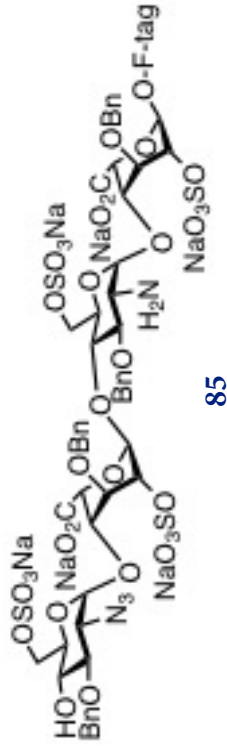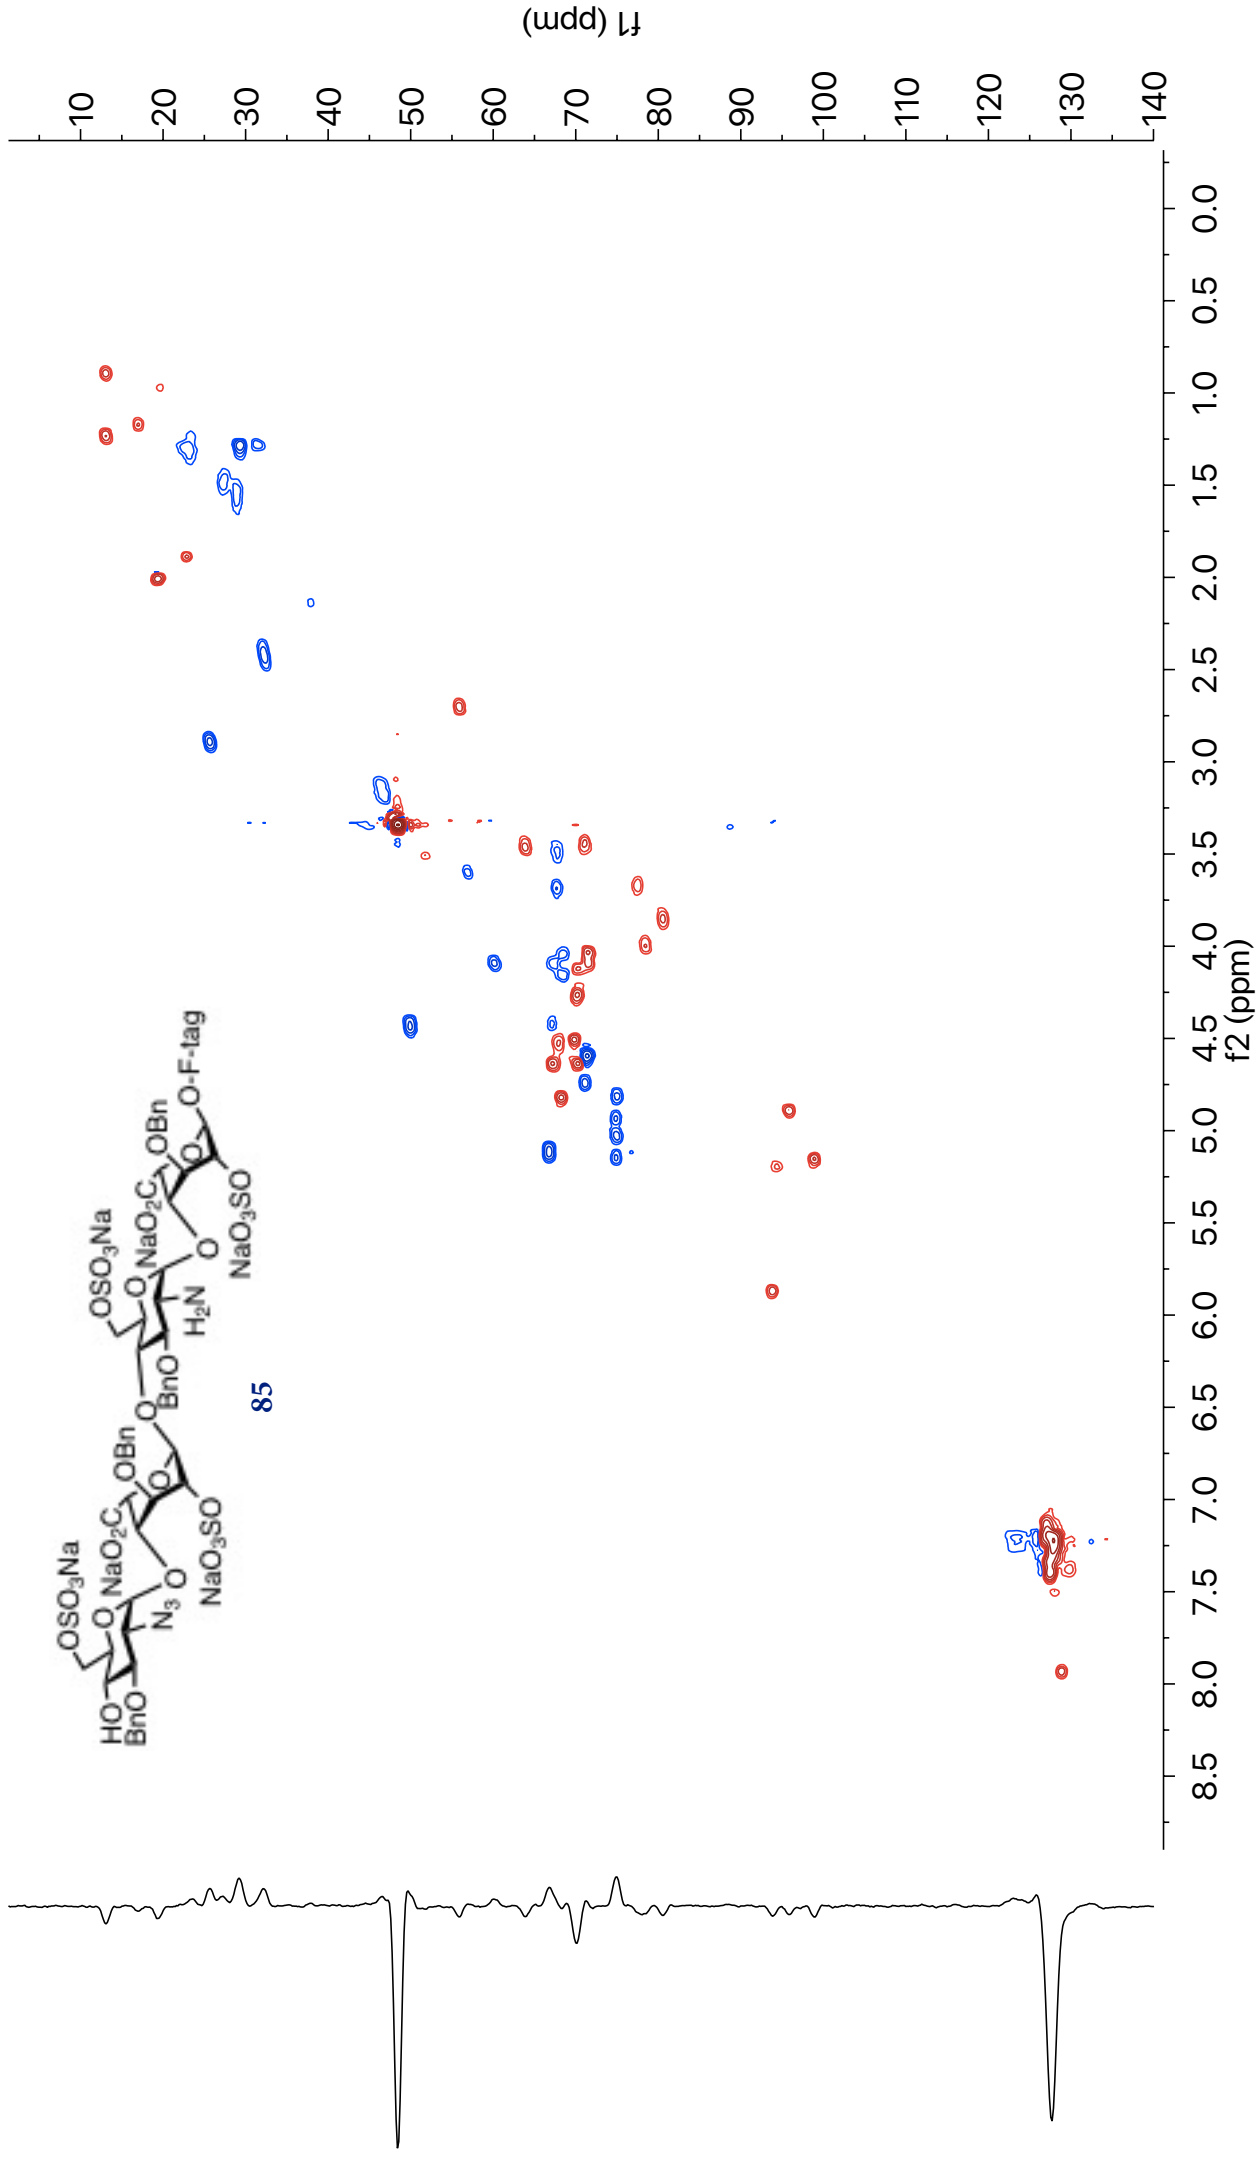

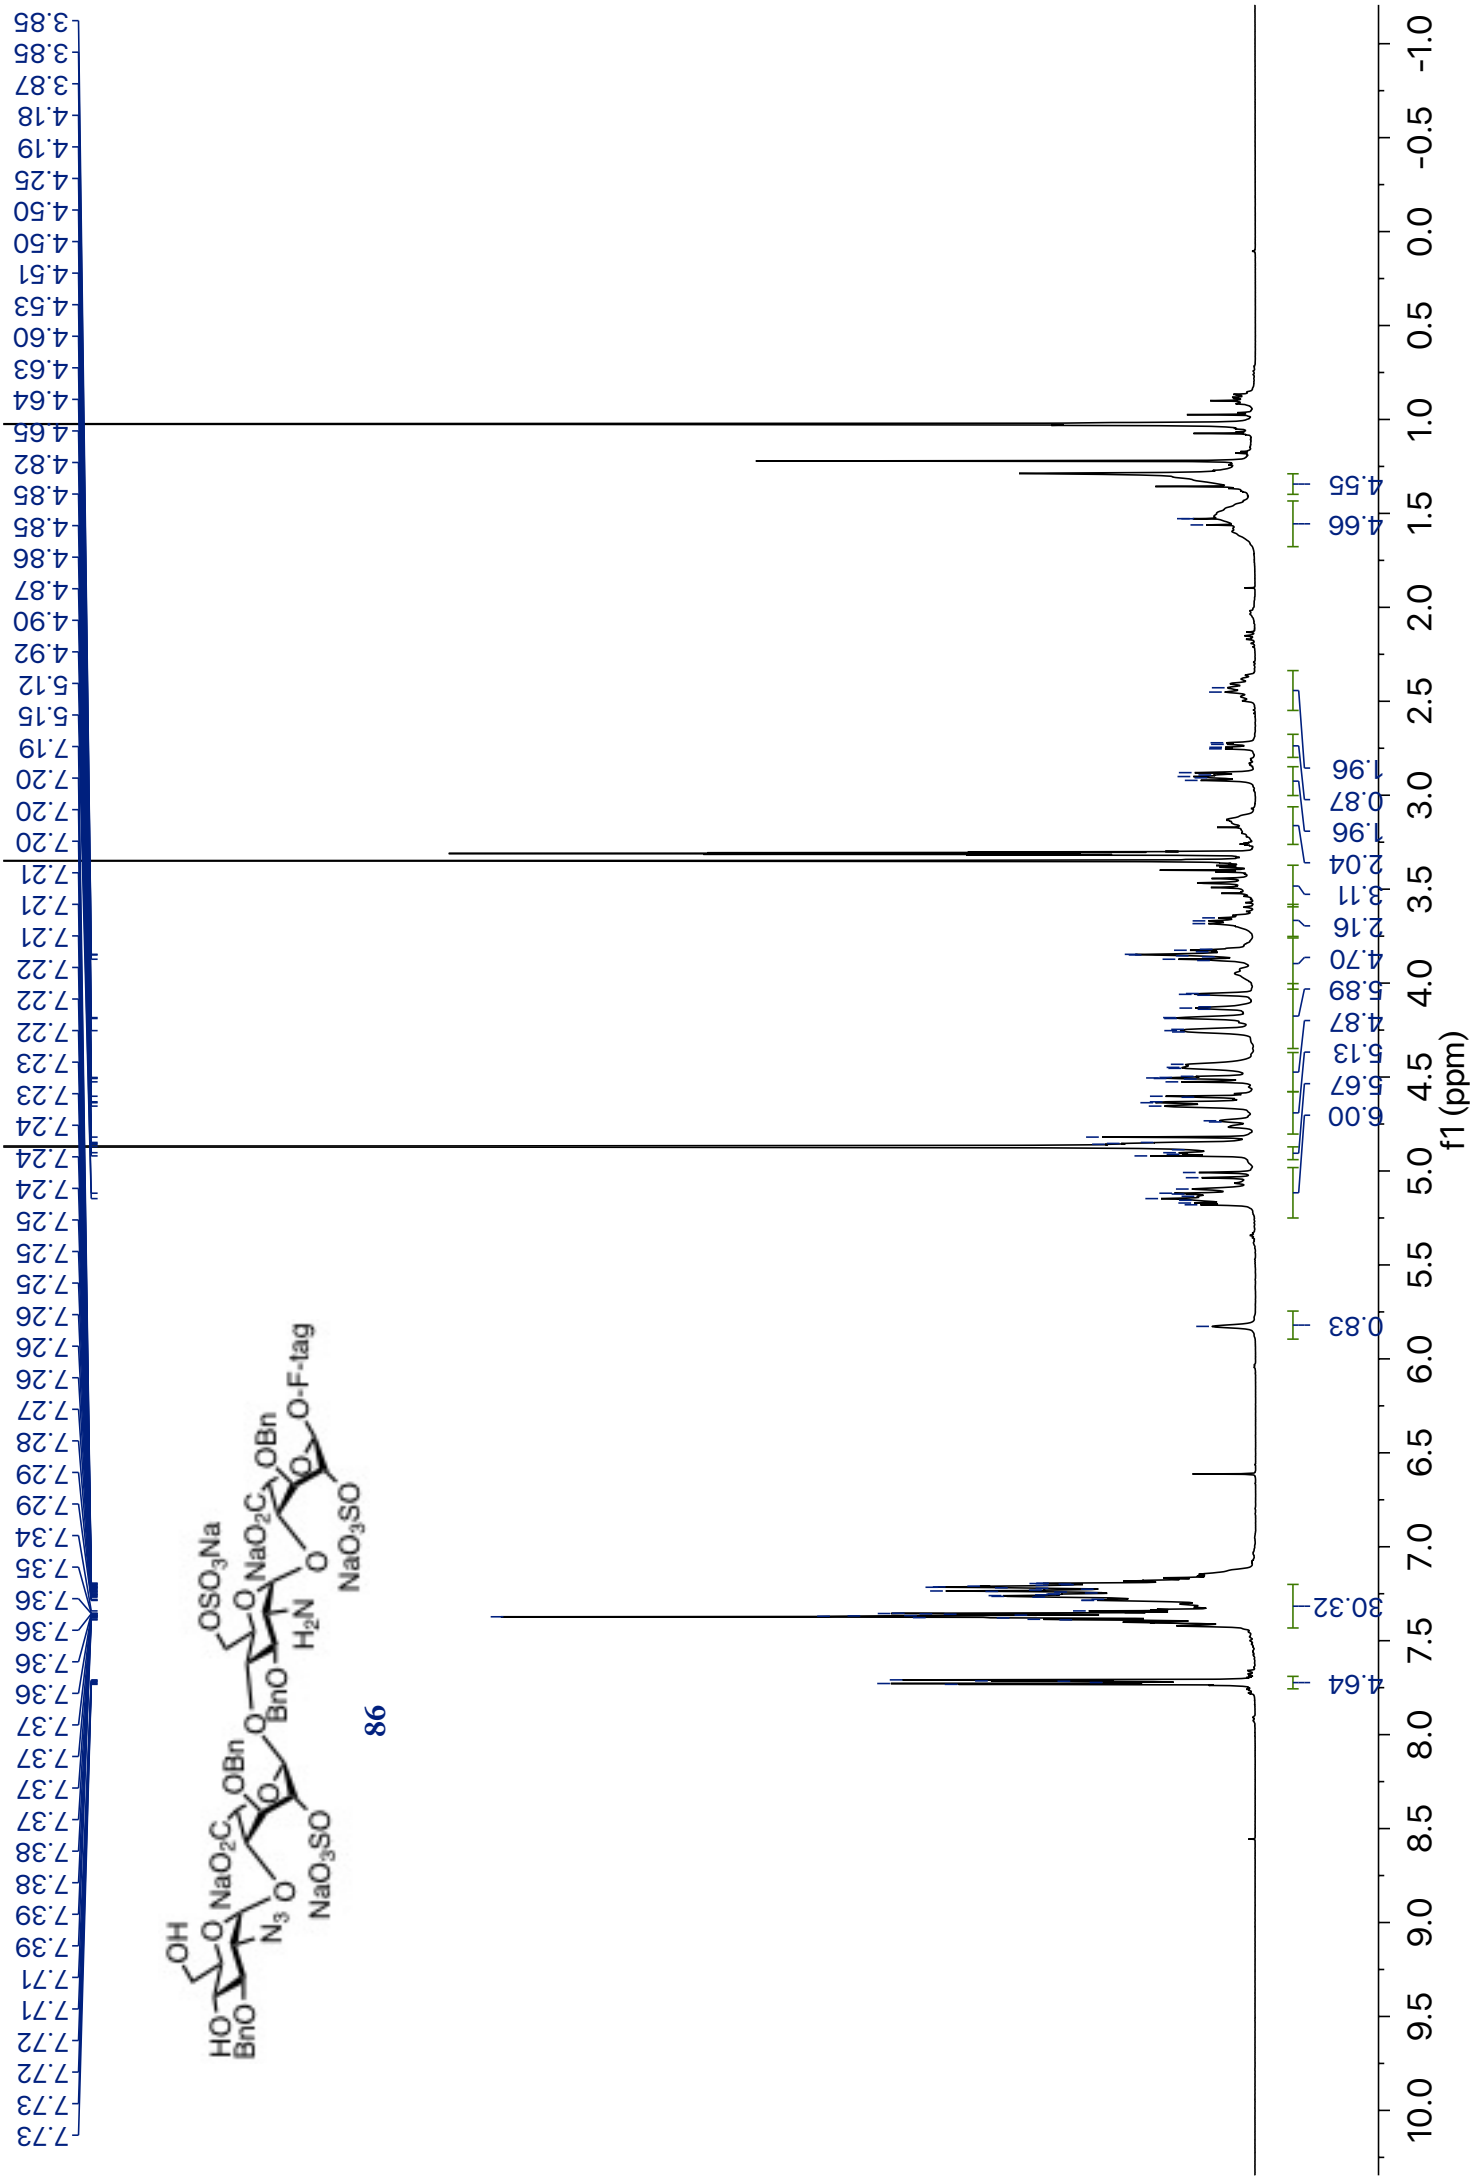

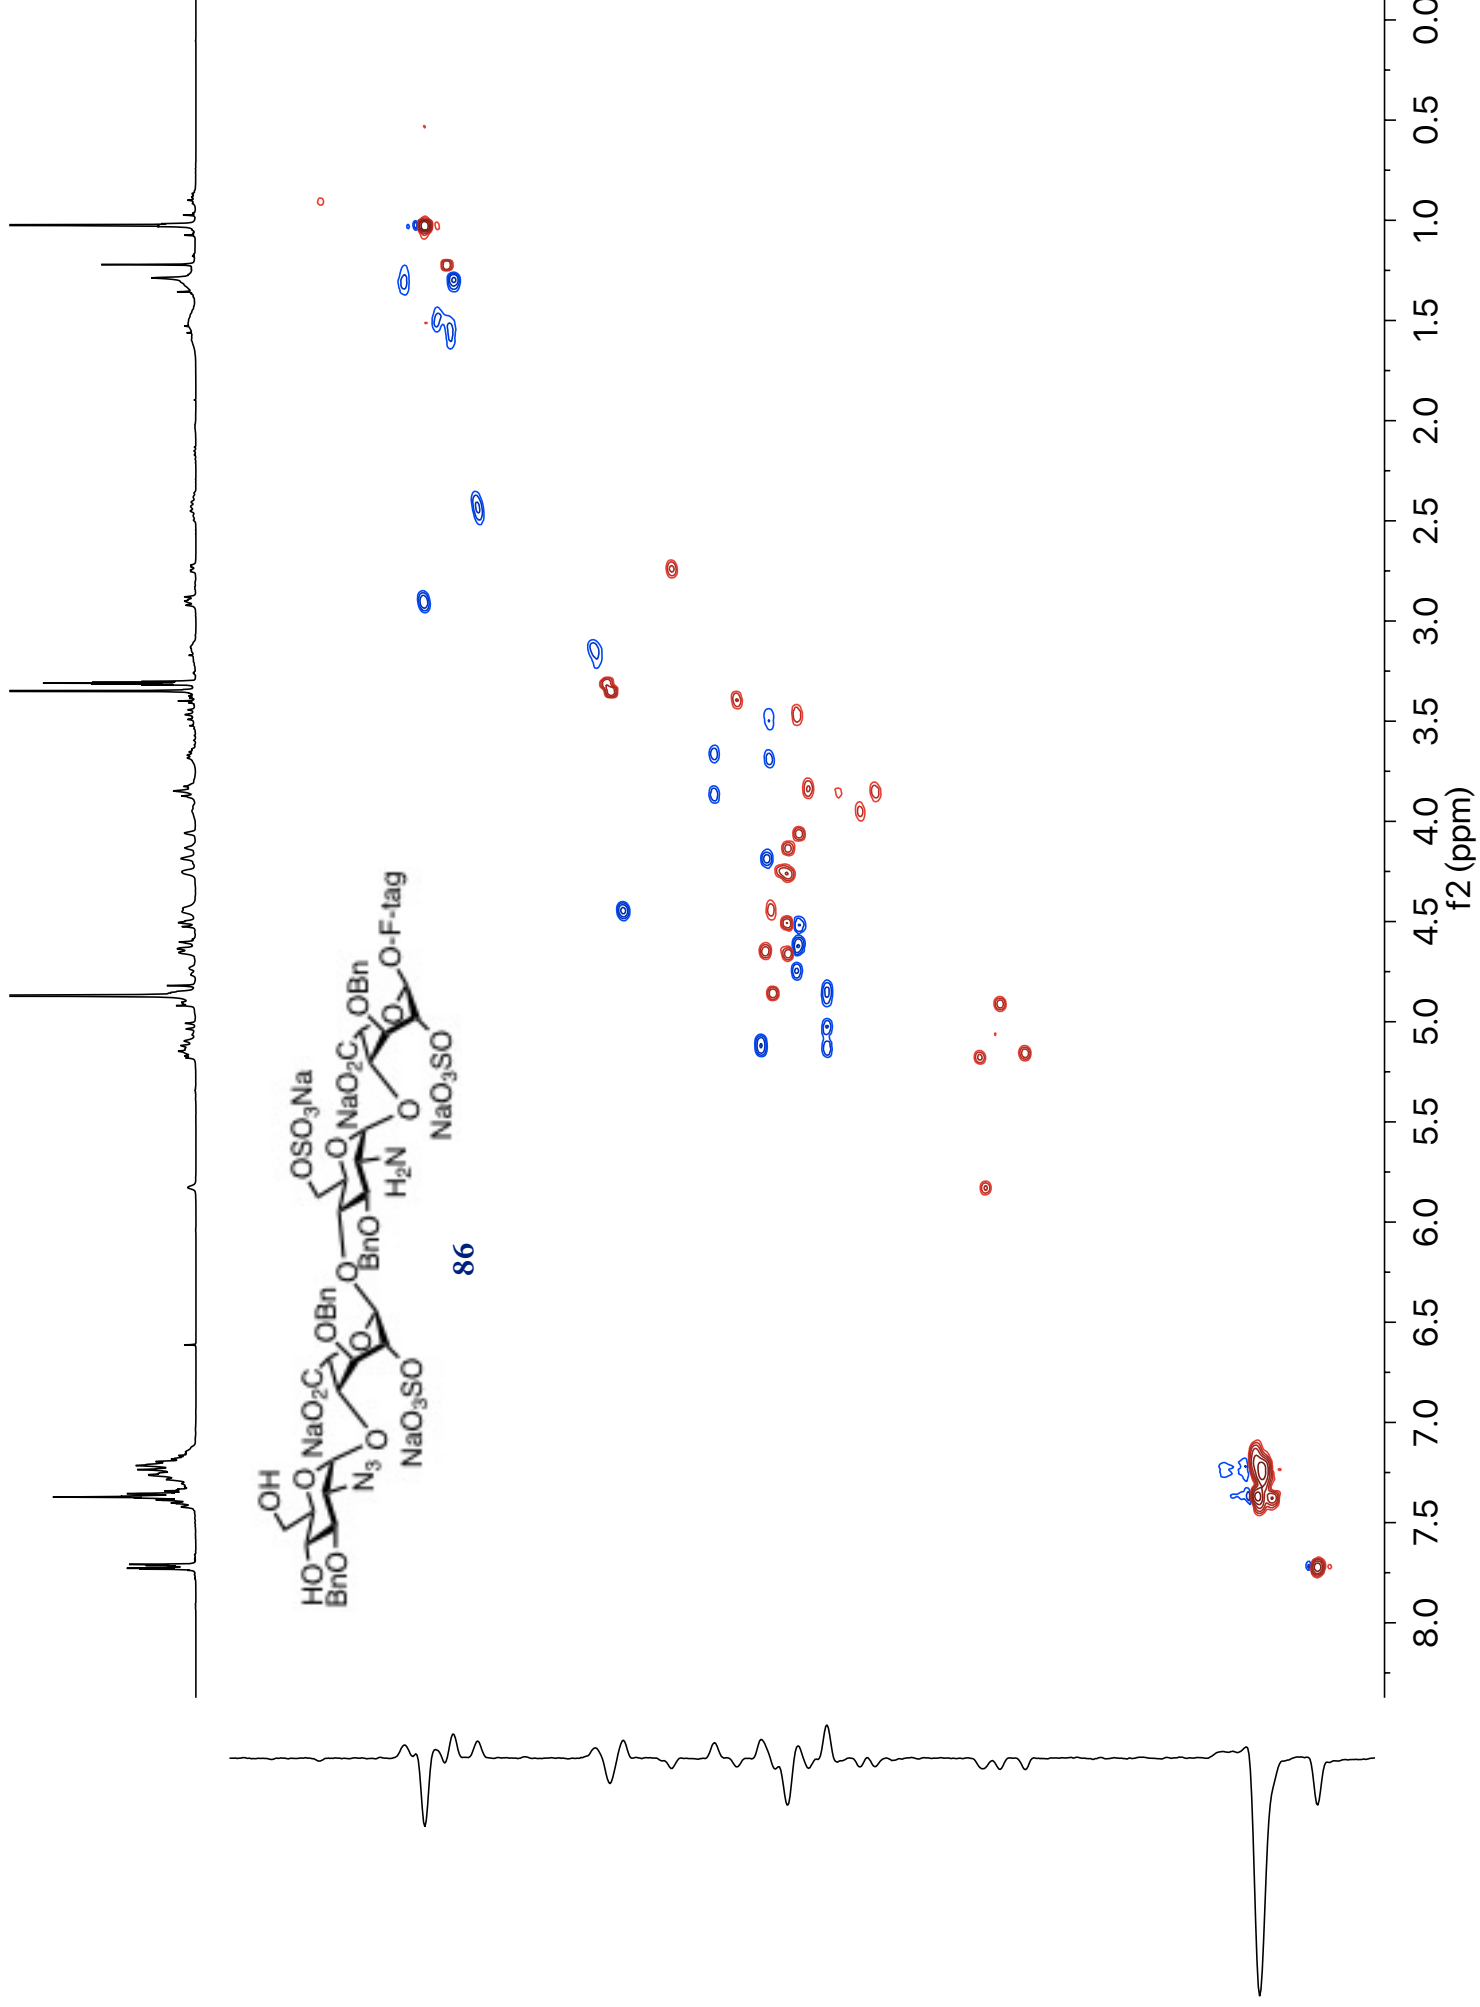



WL-2-275-D-6S-B-6S-A-2S-LiOH-H.2.1.2rr —

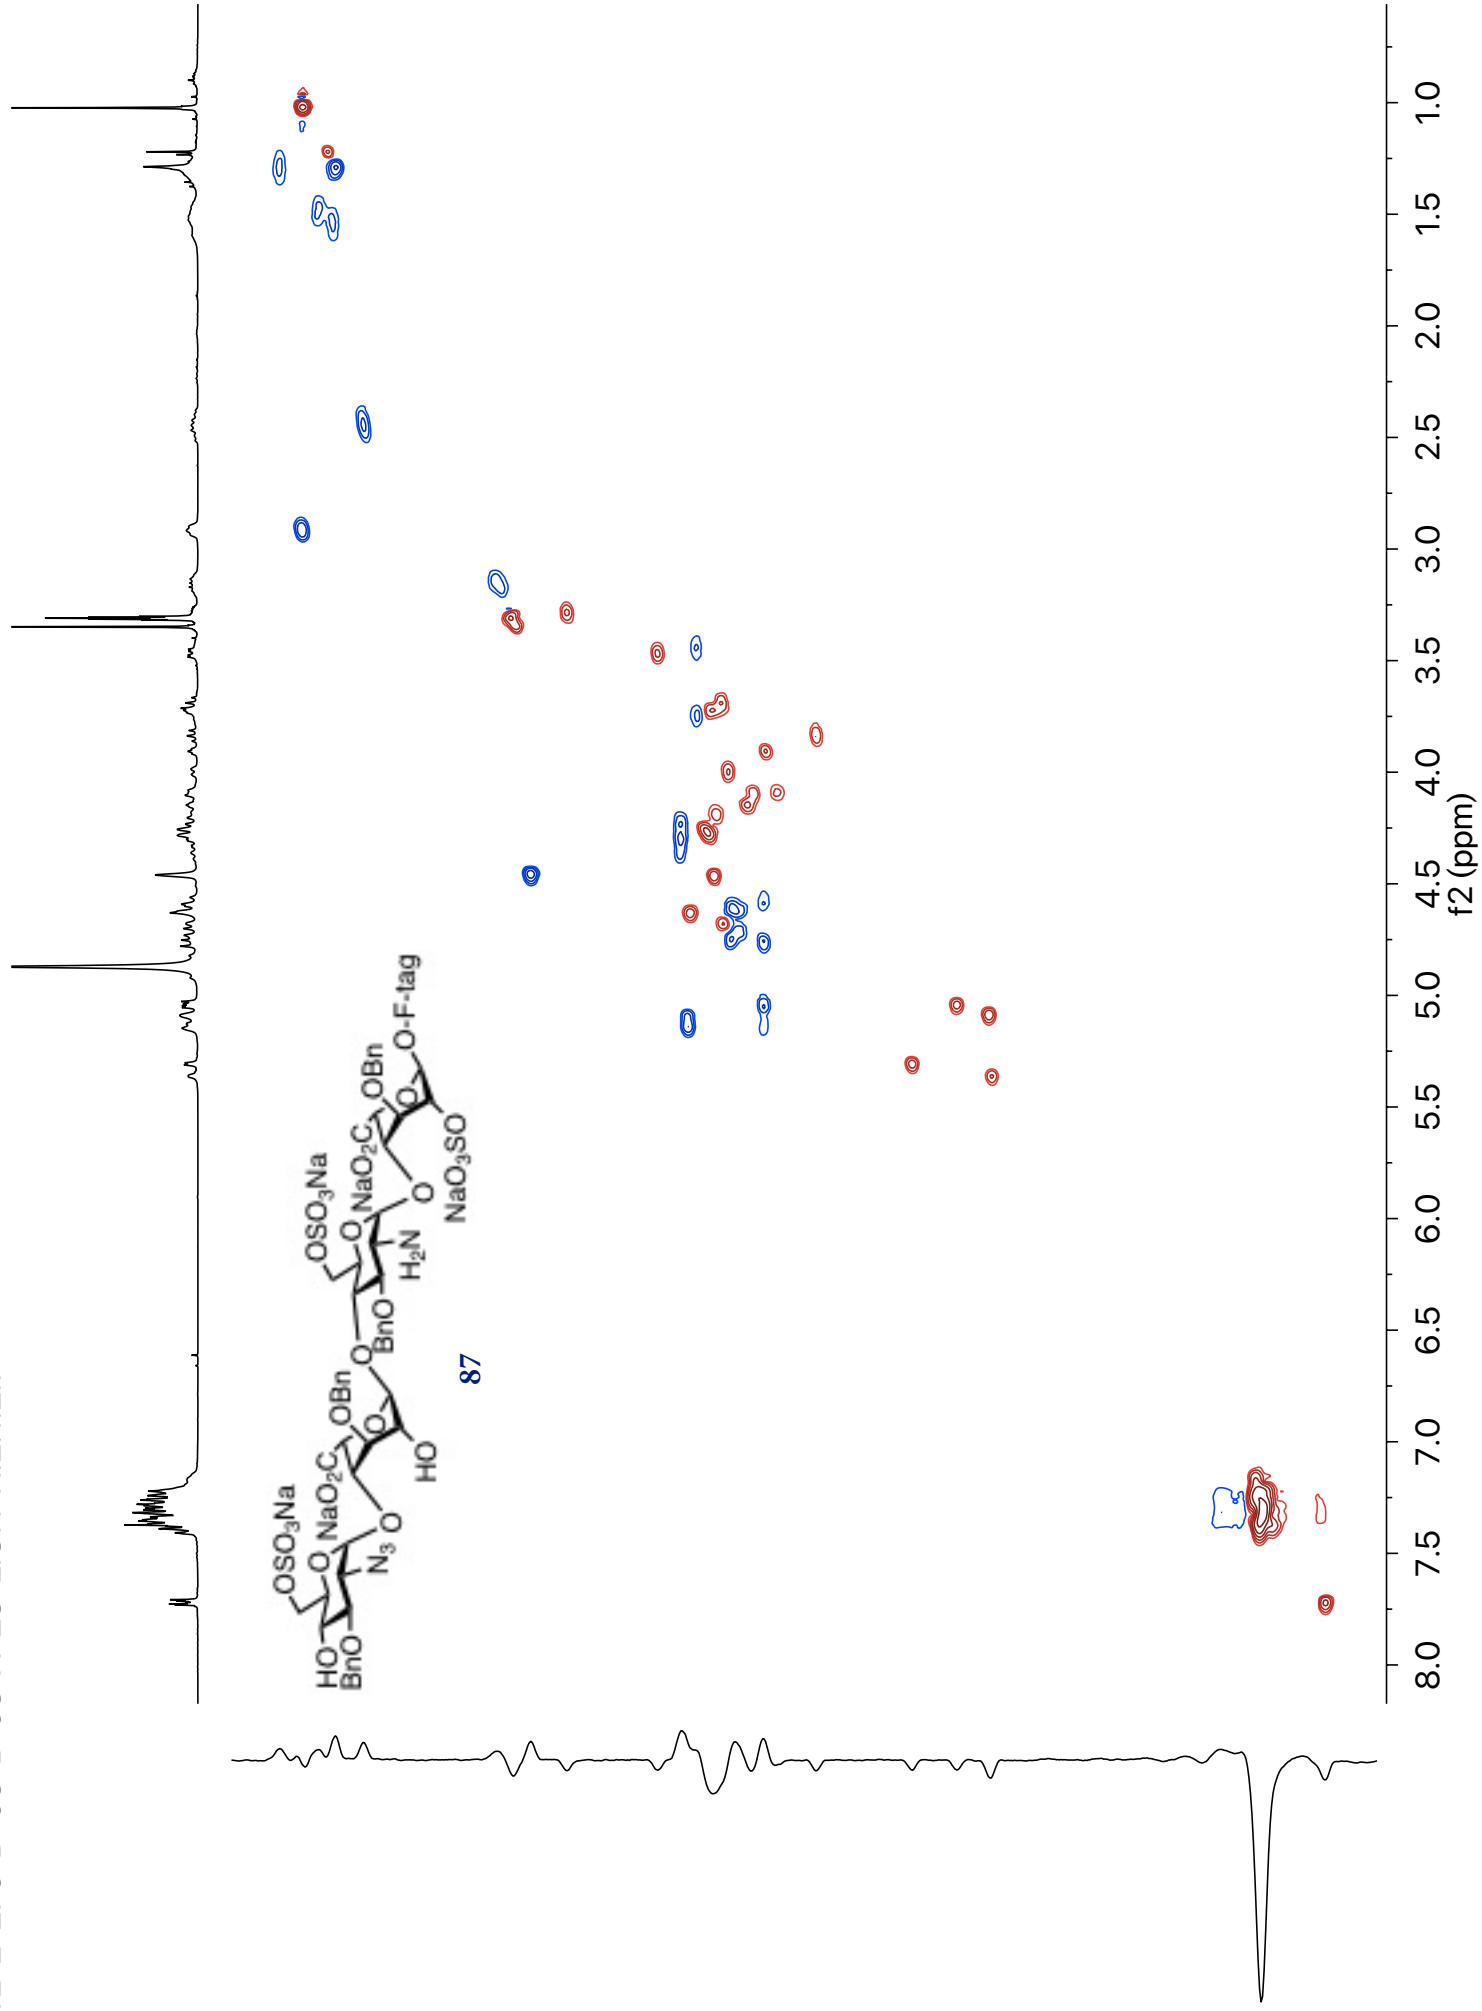



WL-2-276-B-6S-A-2S-LiOH-H.1.1r

7.73 7.71 7.38 7.37 7.37 7.36 7.36 7.36 7.36 7.36 7.35 7.35 7.31 7.31 7.28 7.26 5.35 5.35 5.12 5.08 5.08 5.08 5.05 5.04 5.03 5.02 5.01 4.93 4.88 4.87 4.83 4.80 4.80 4.78 4.76 4.76 4.74 4.66 4.64 4.63 4.49 4.49 4.45 4.28 4.28 4.23 4.17 3.89 3.88 3.85 3.85 3.83 3.83 3.82 3.81 3.80 3.80 3.50 3.49 3.48 3.35 3.34 3.32 3.31 3.31 3.30 3.30

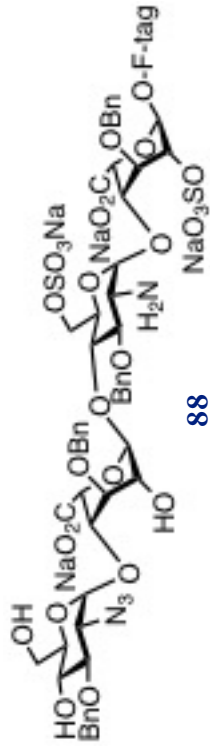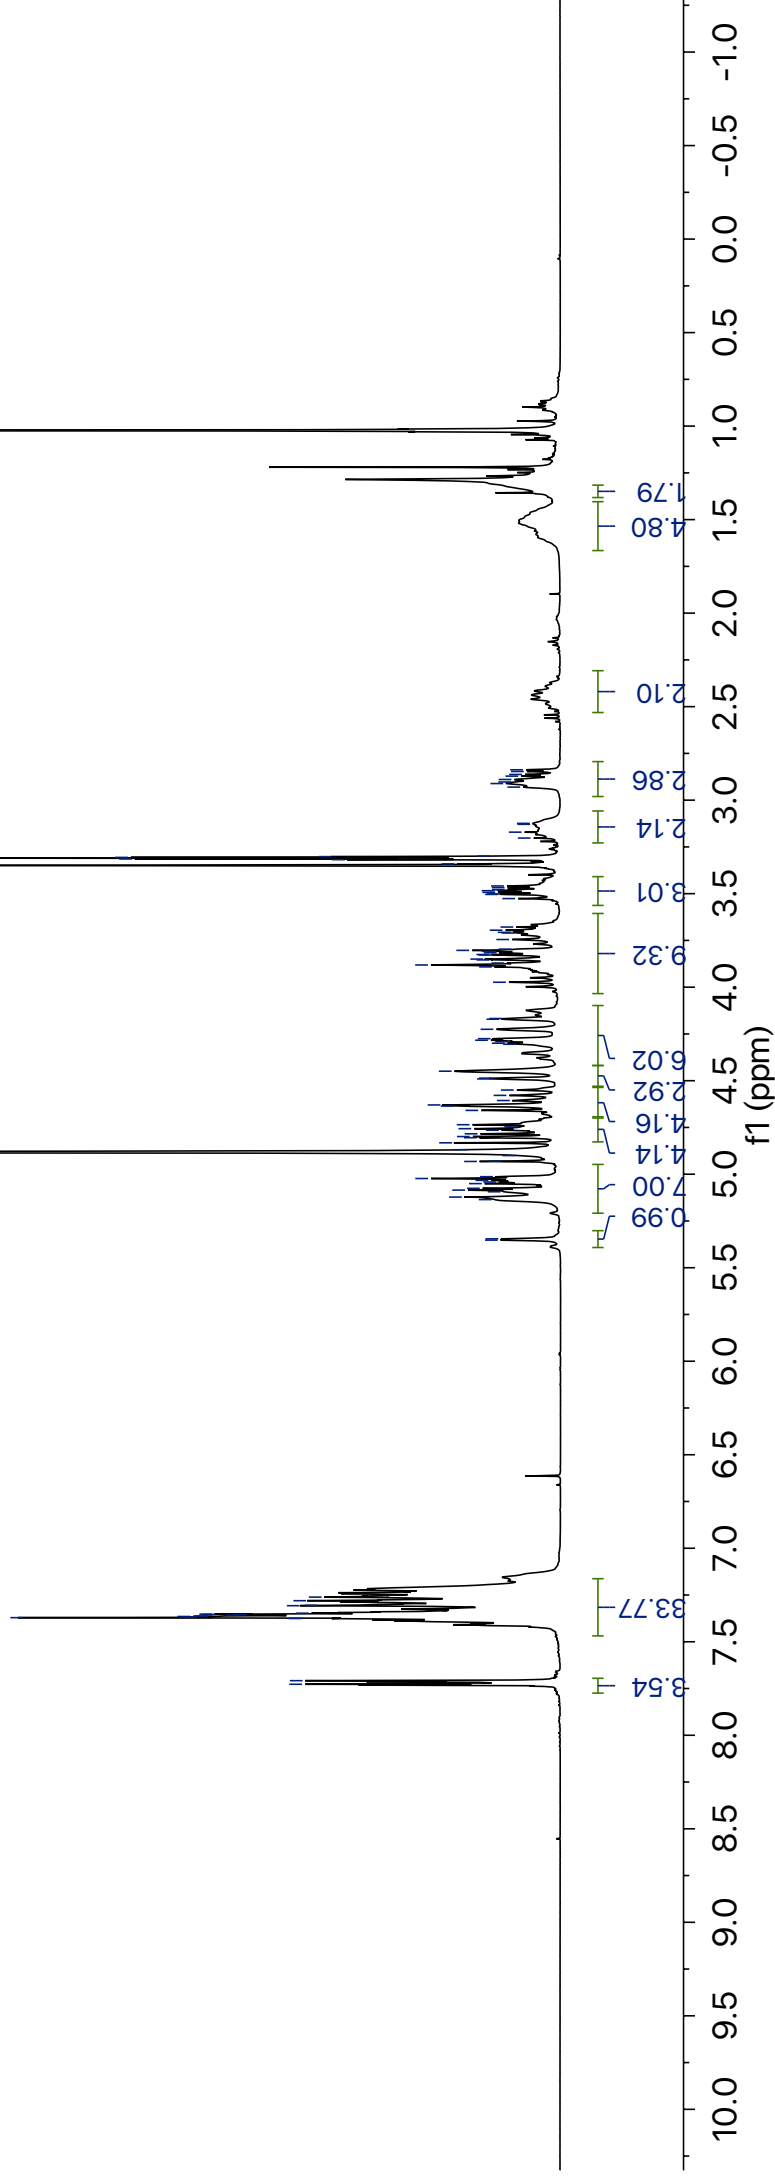

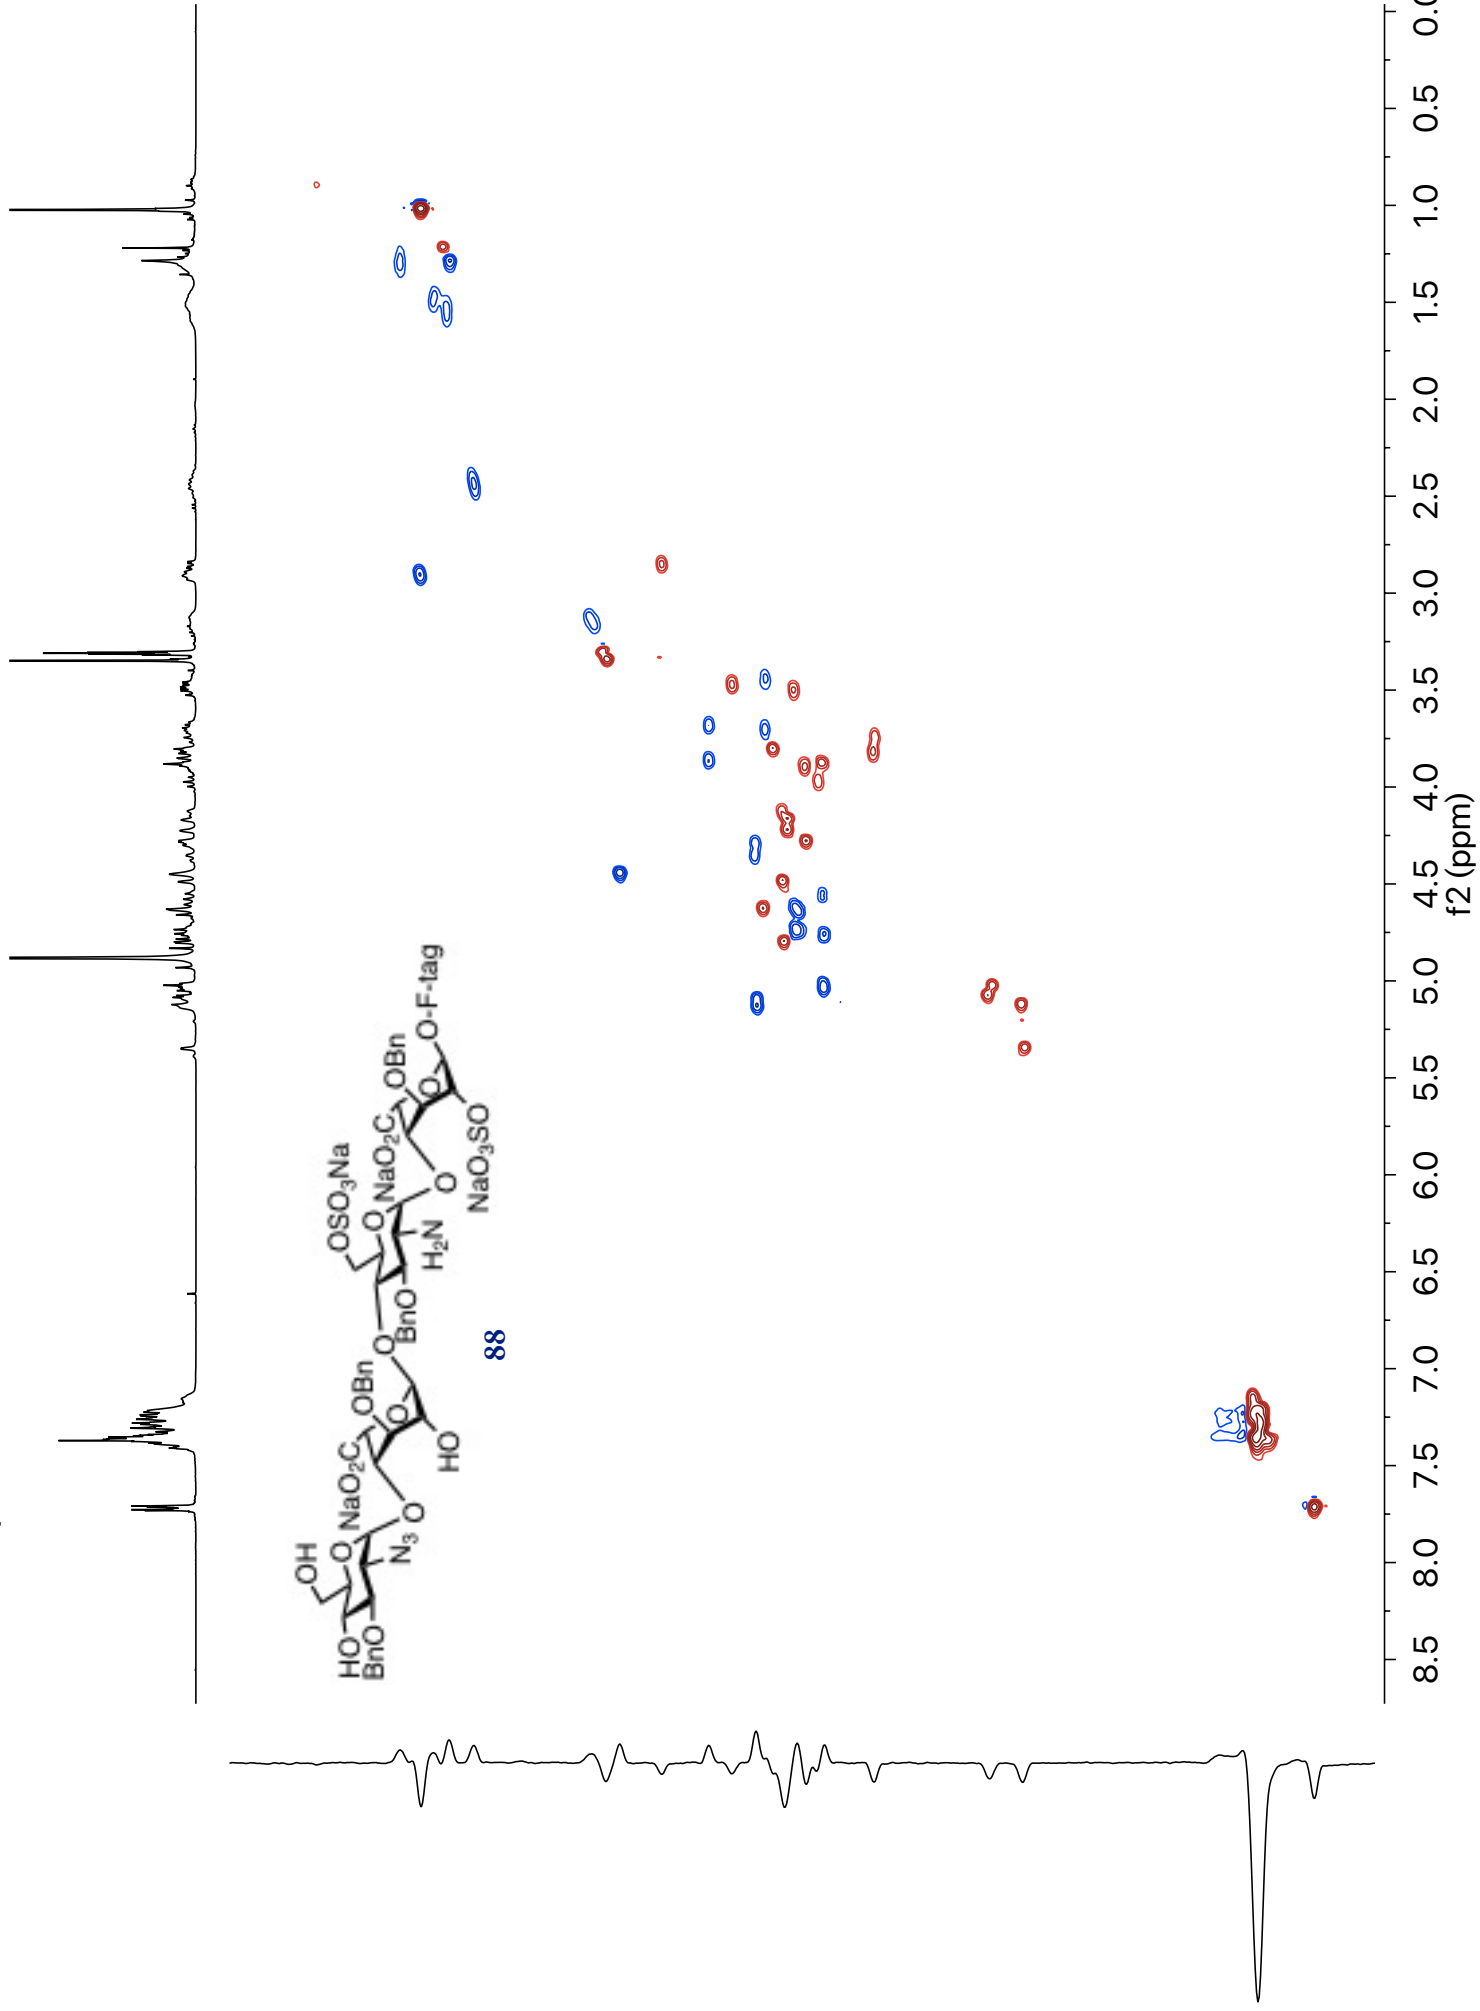



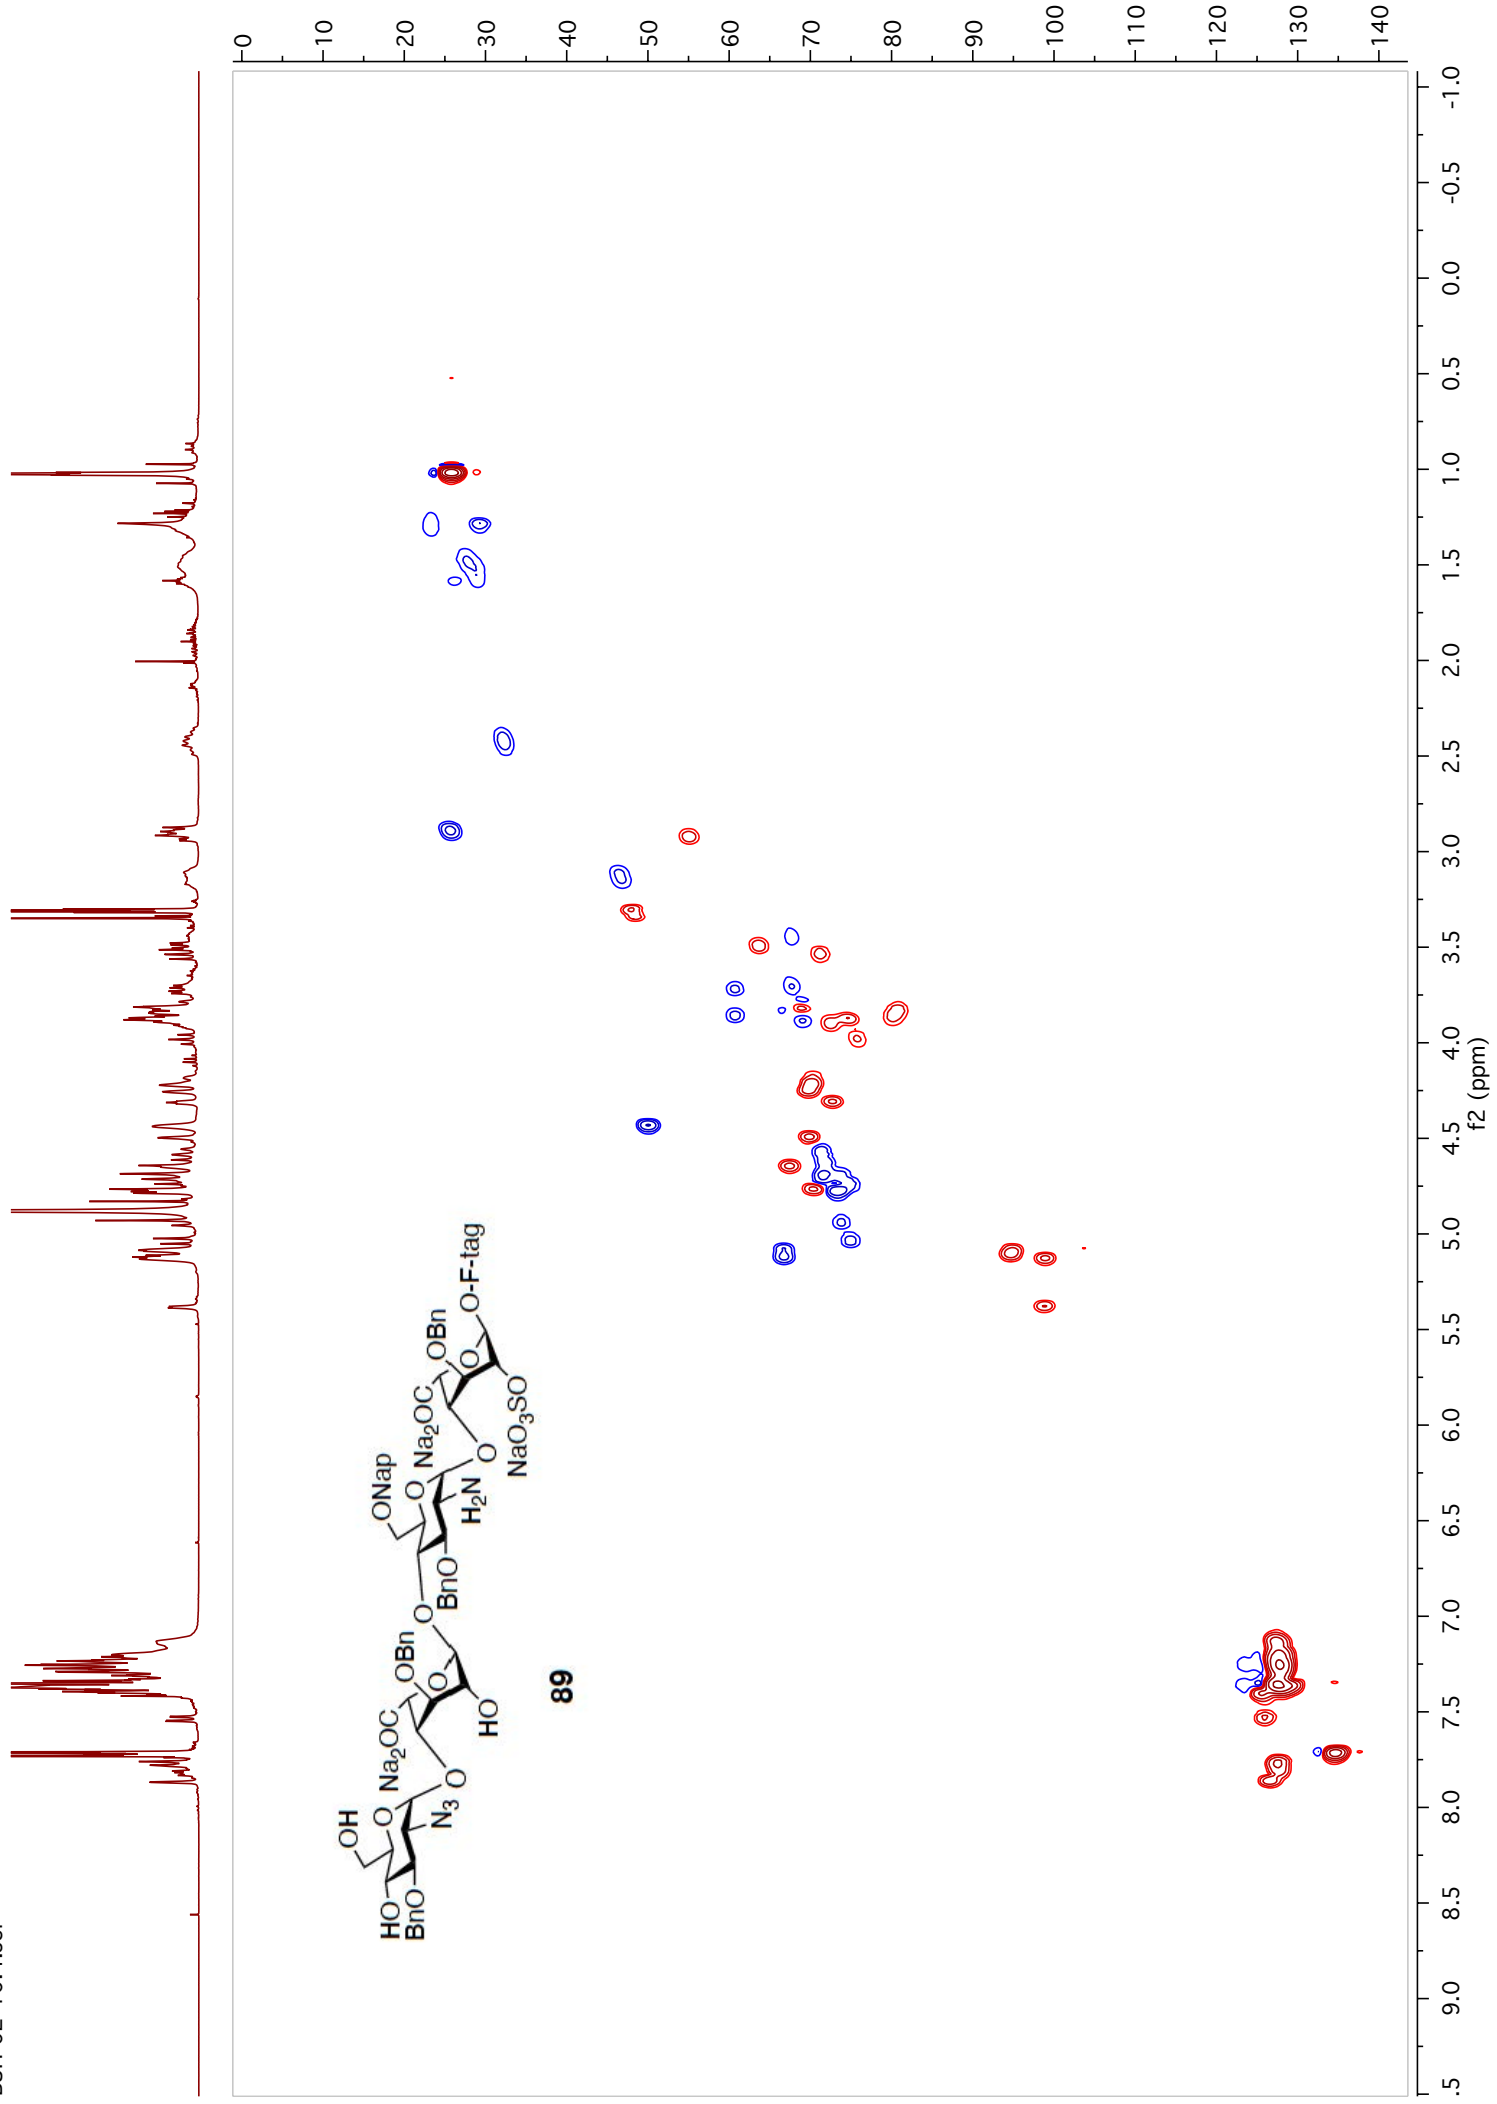

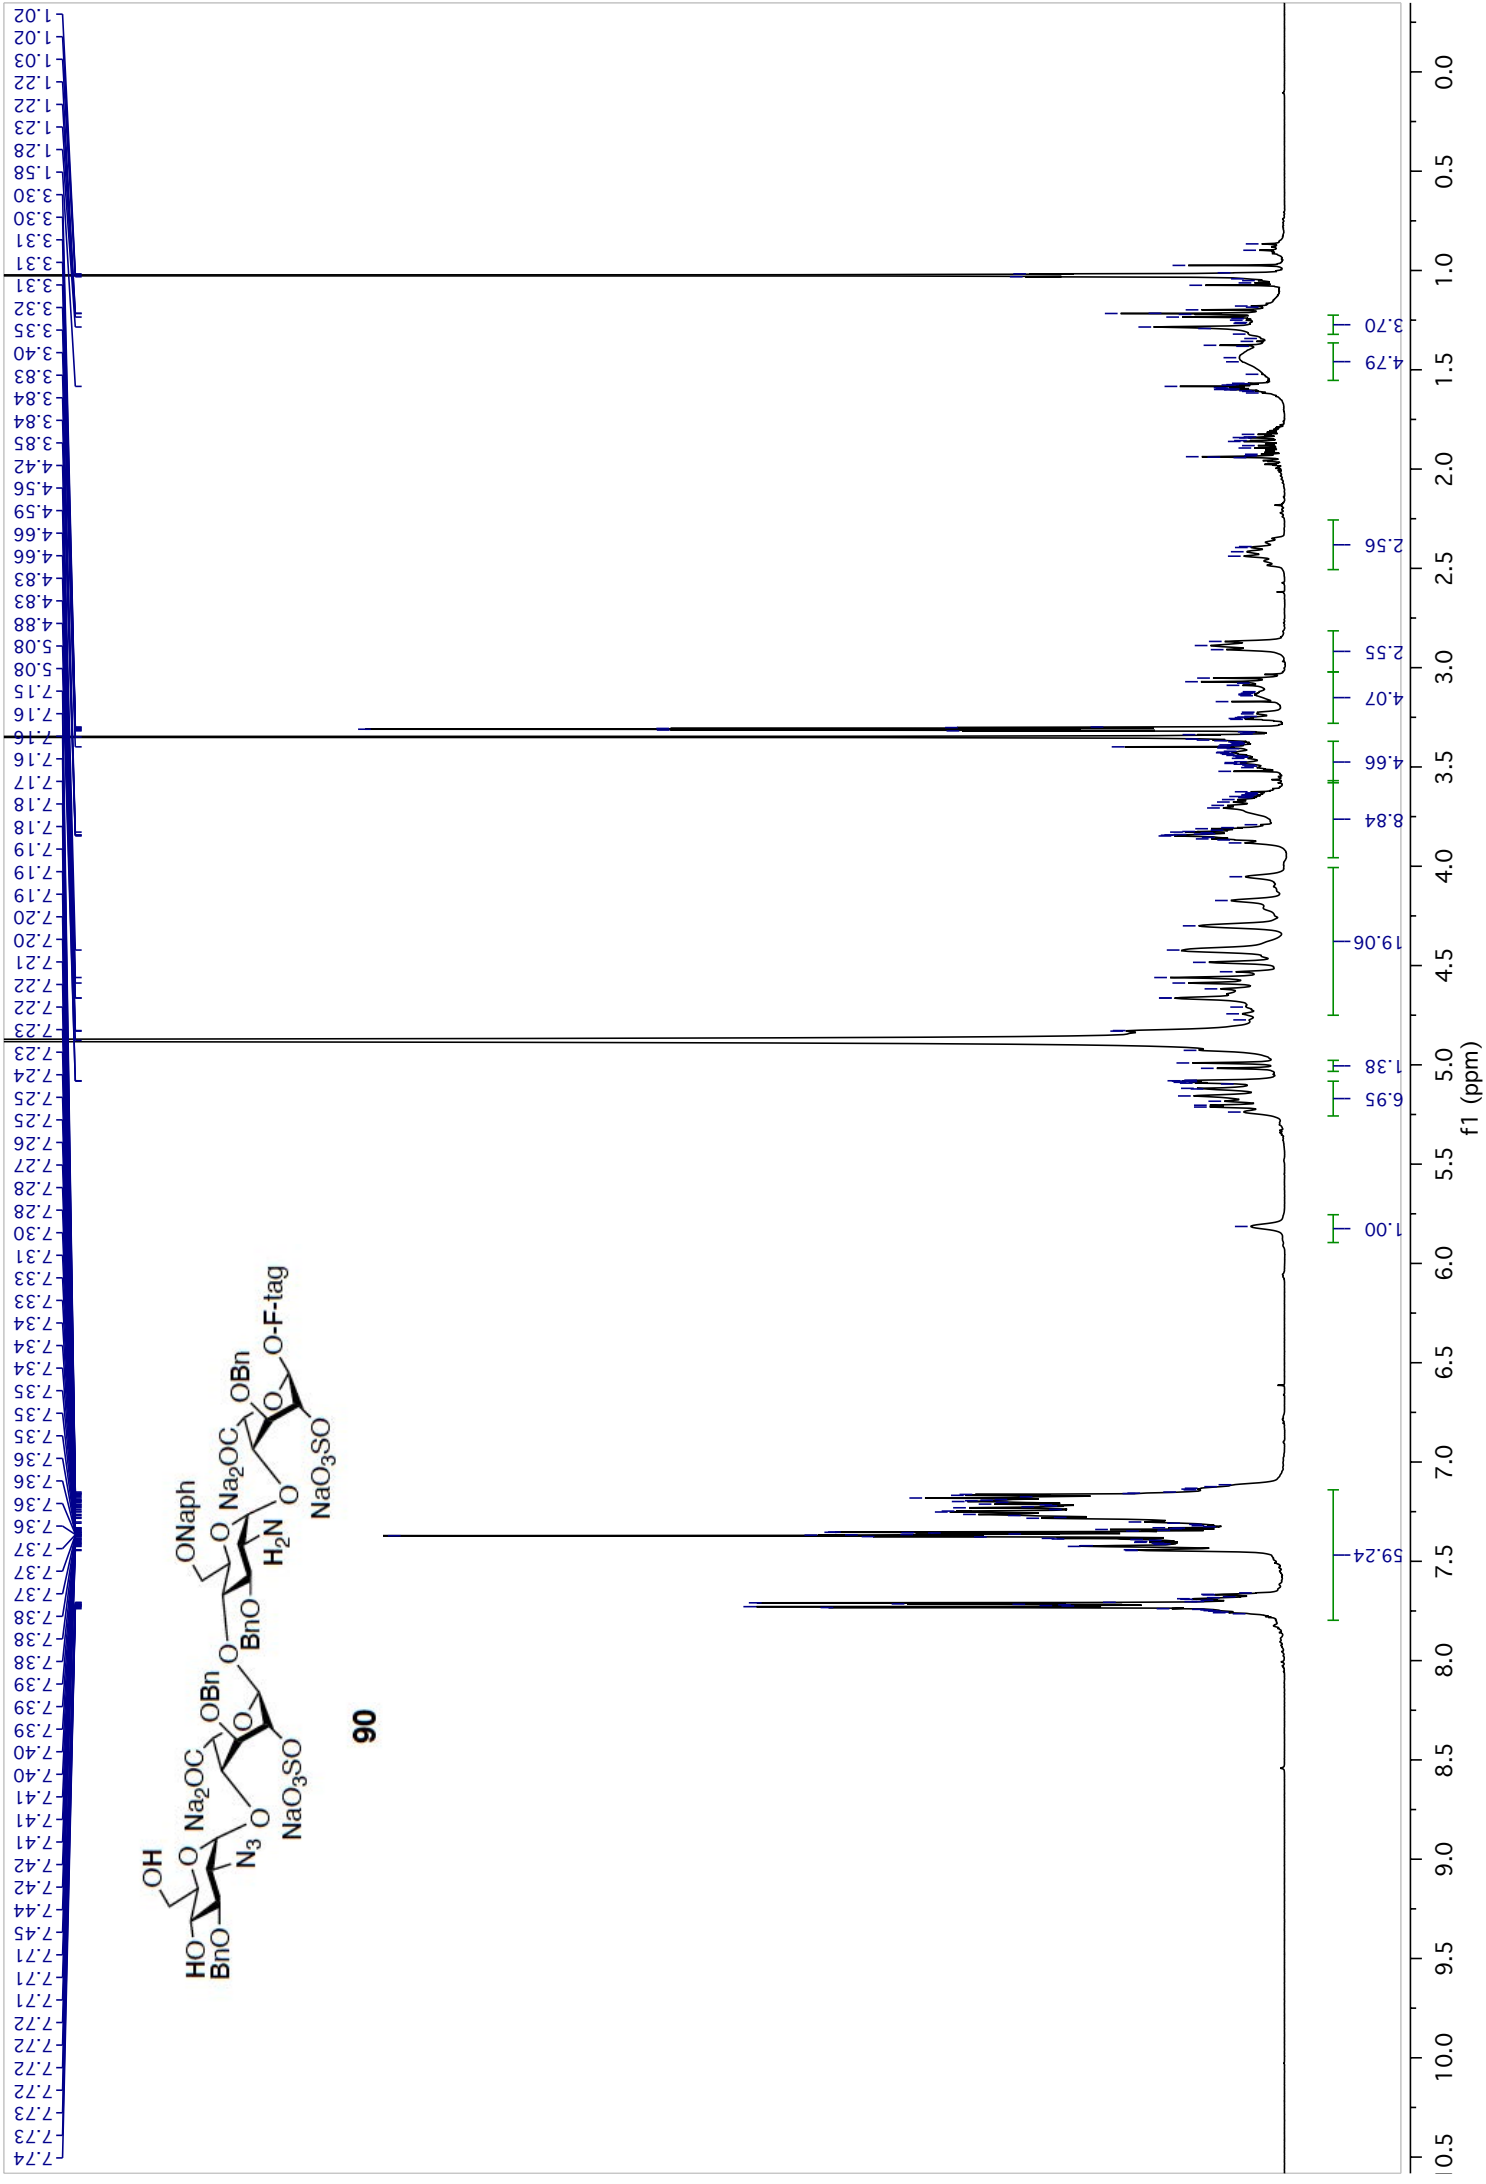

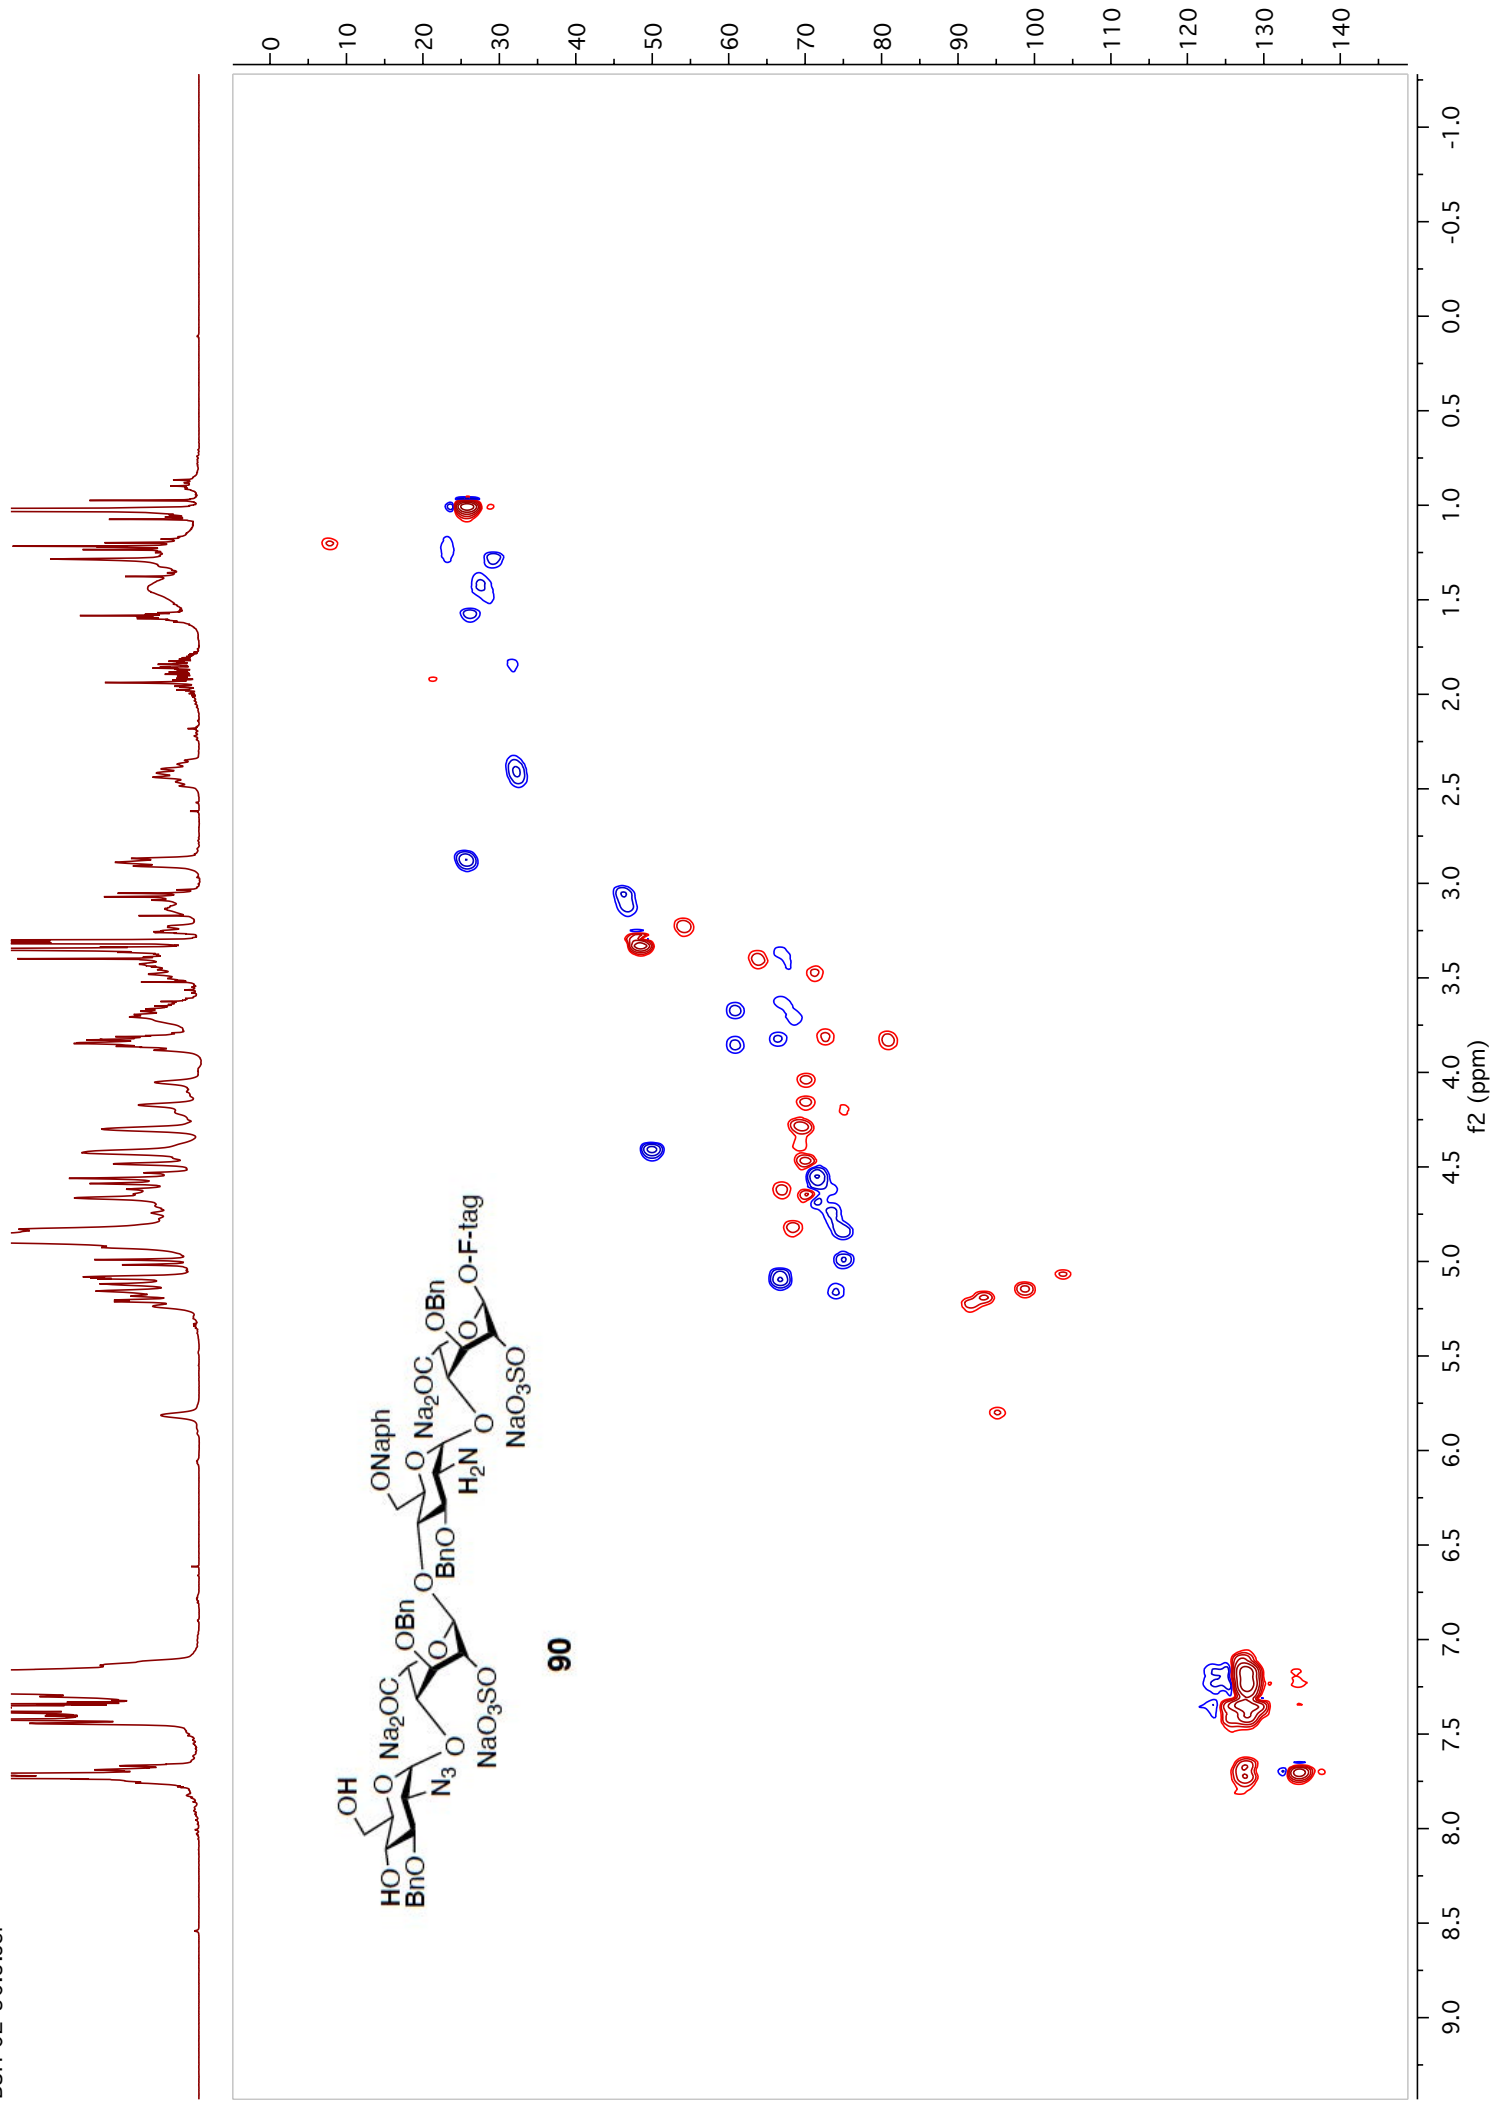



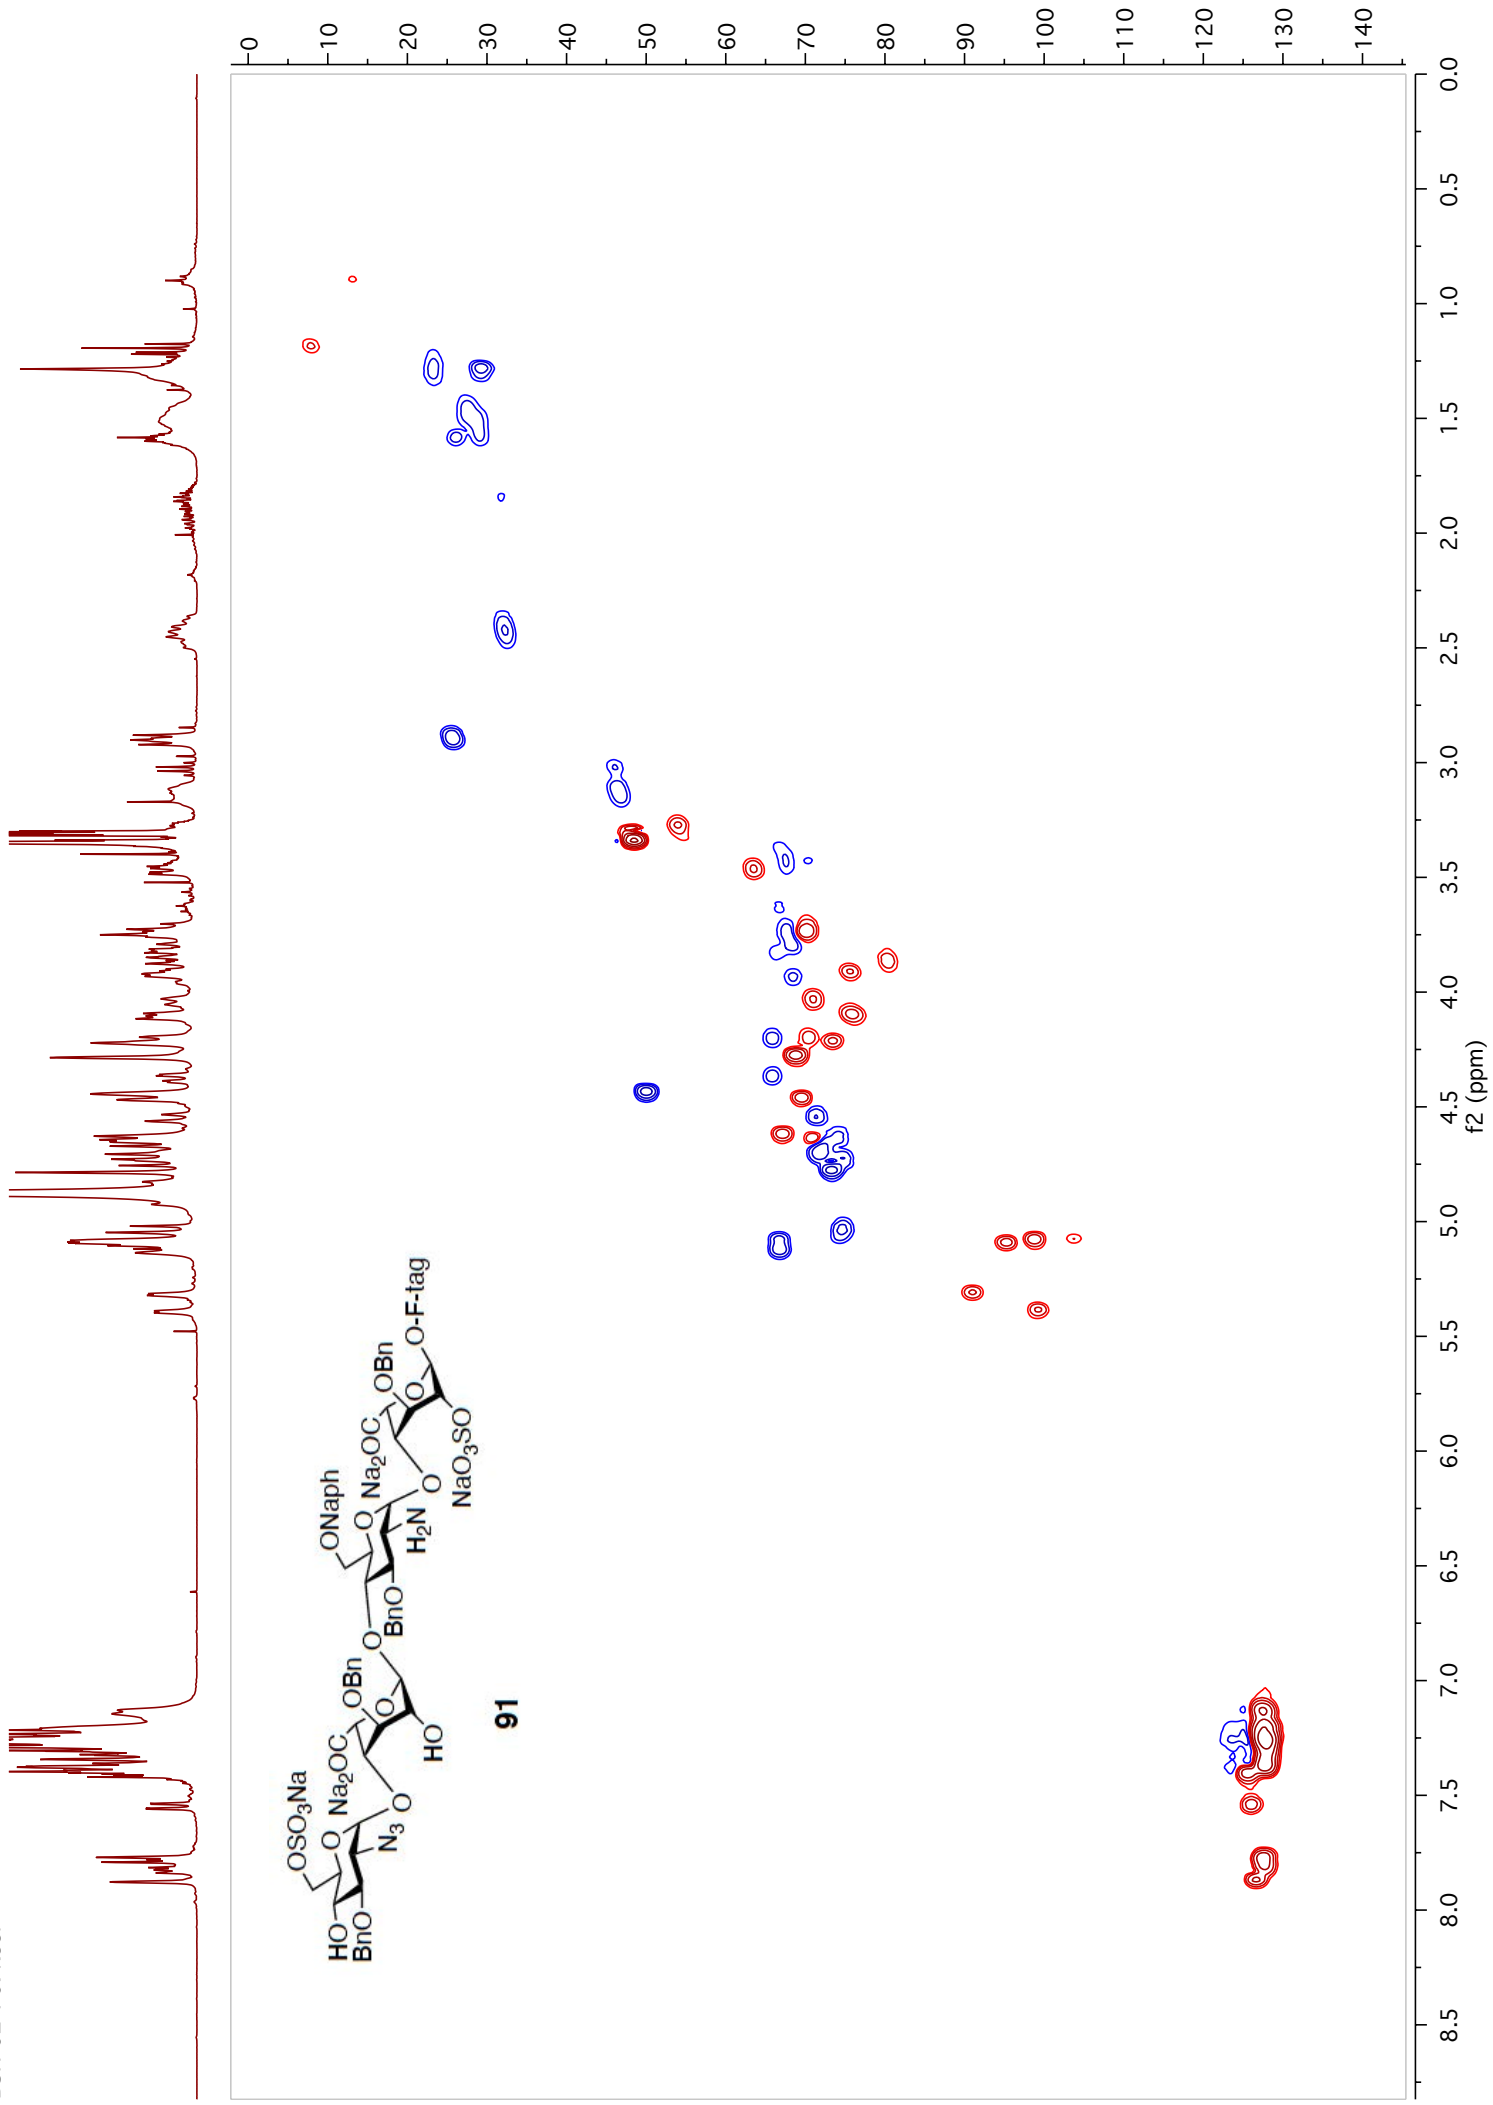



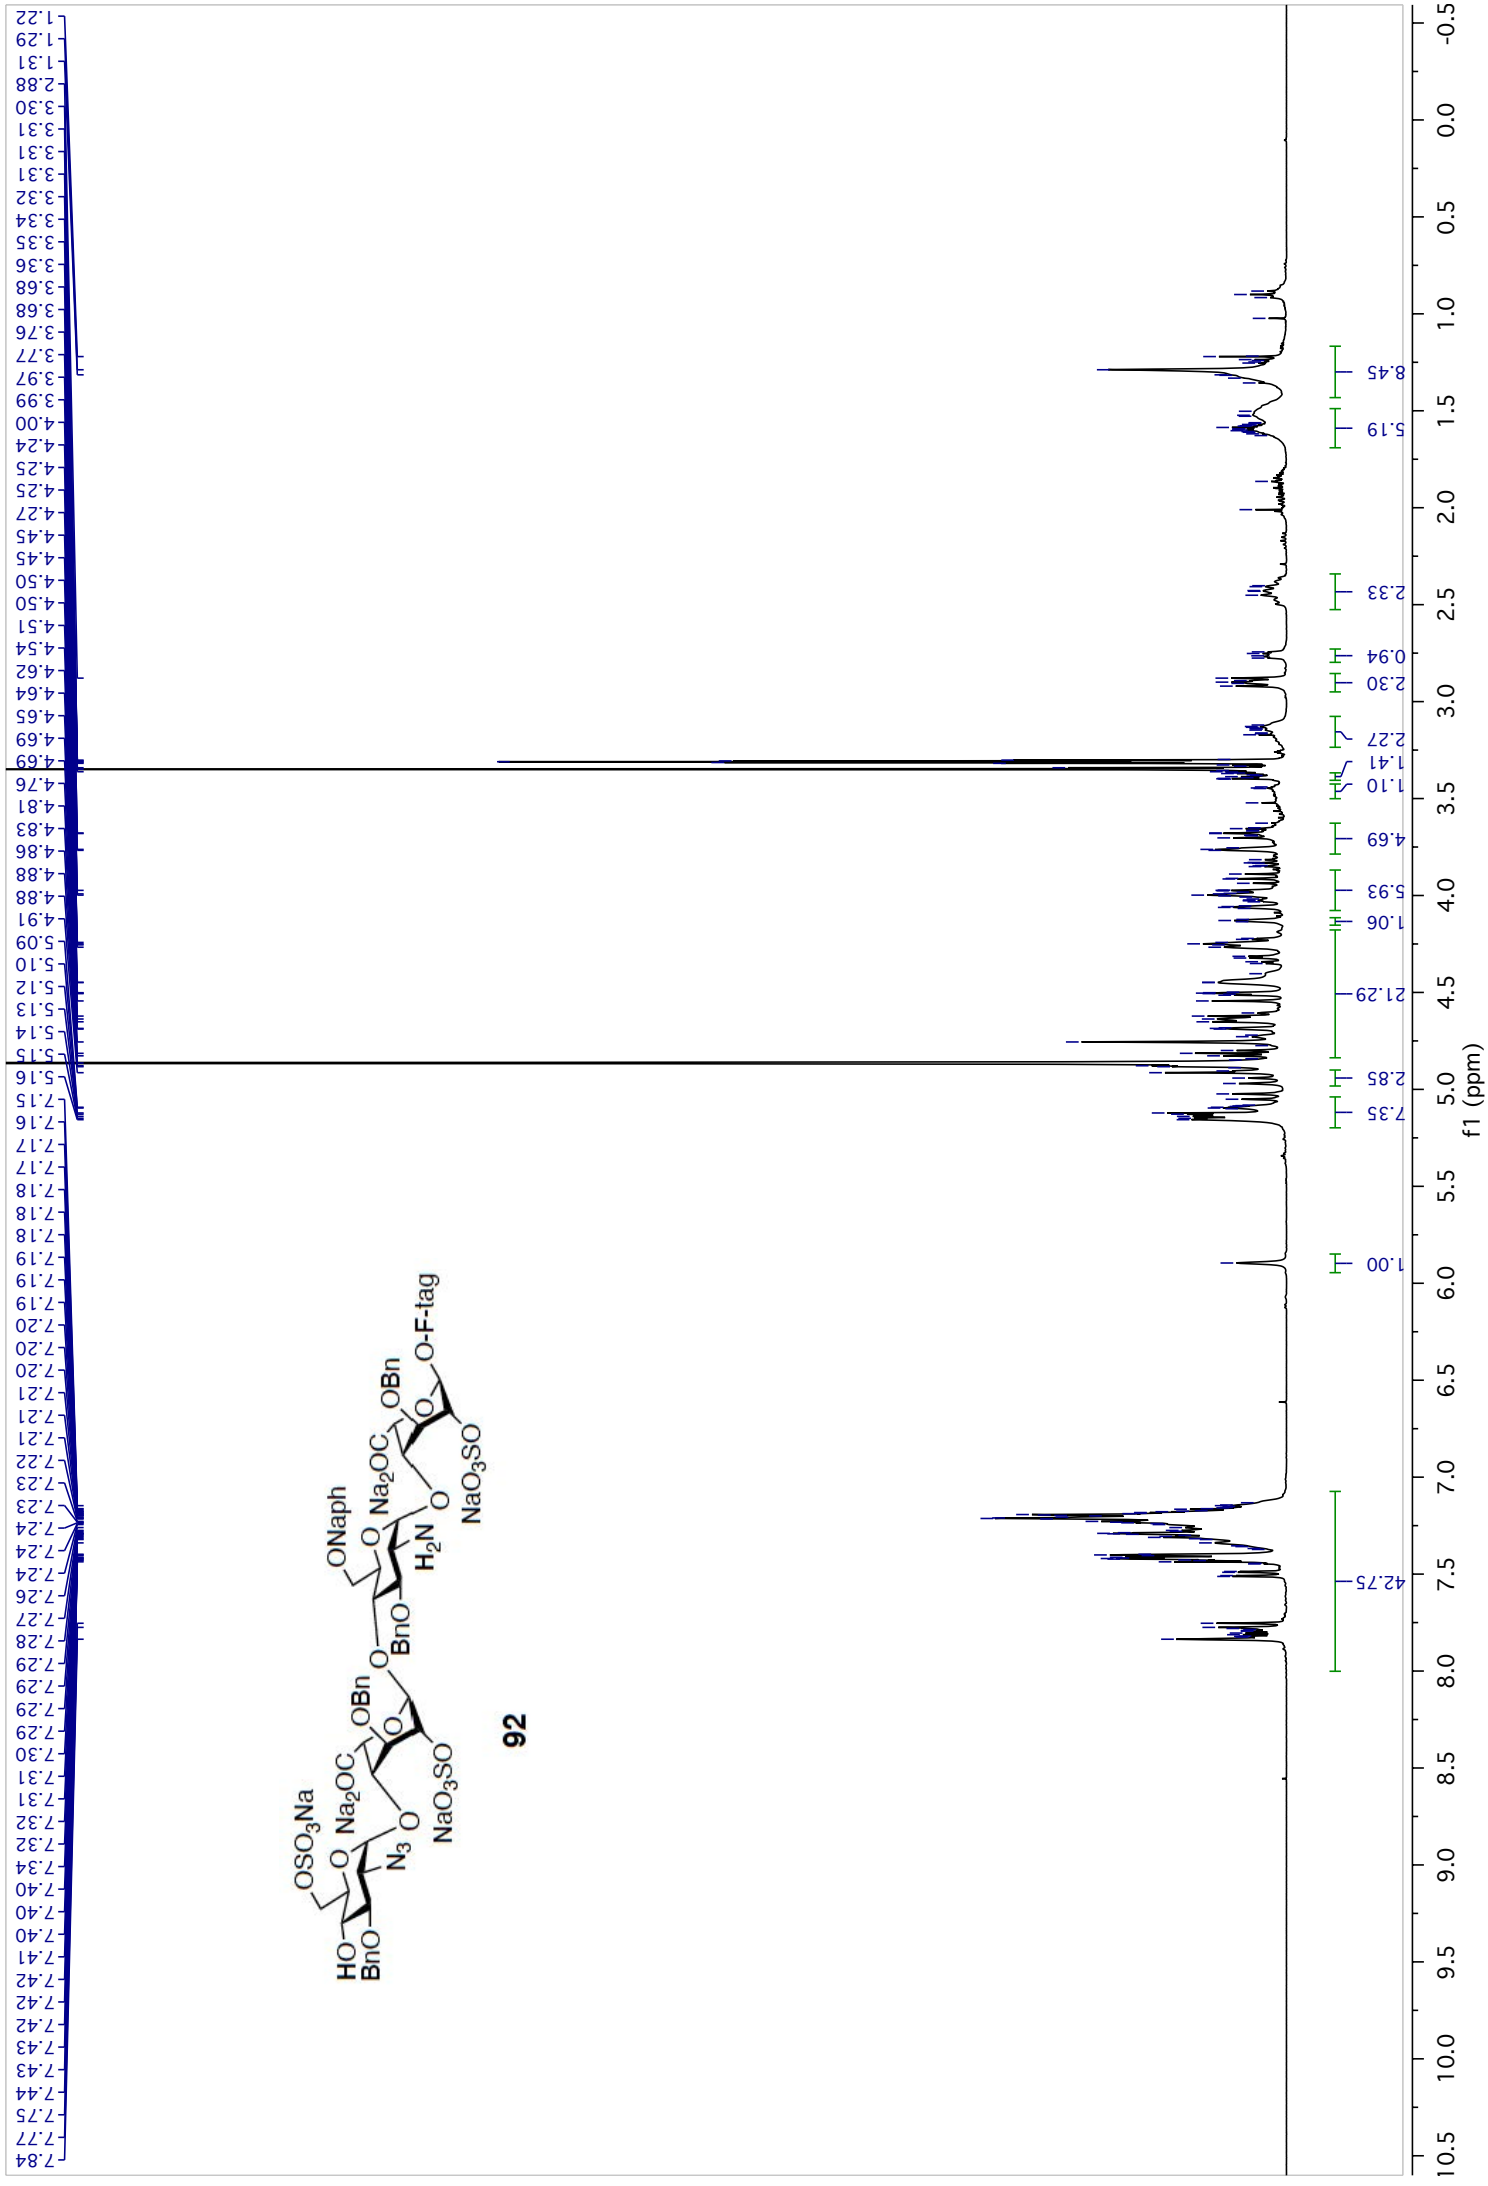

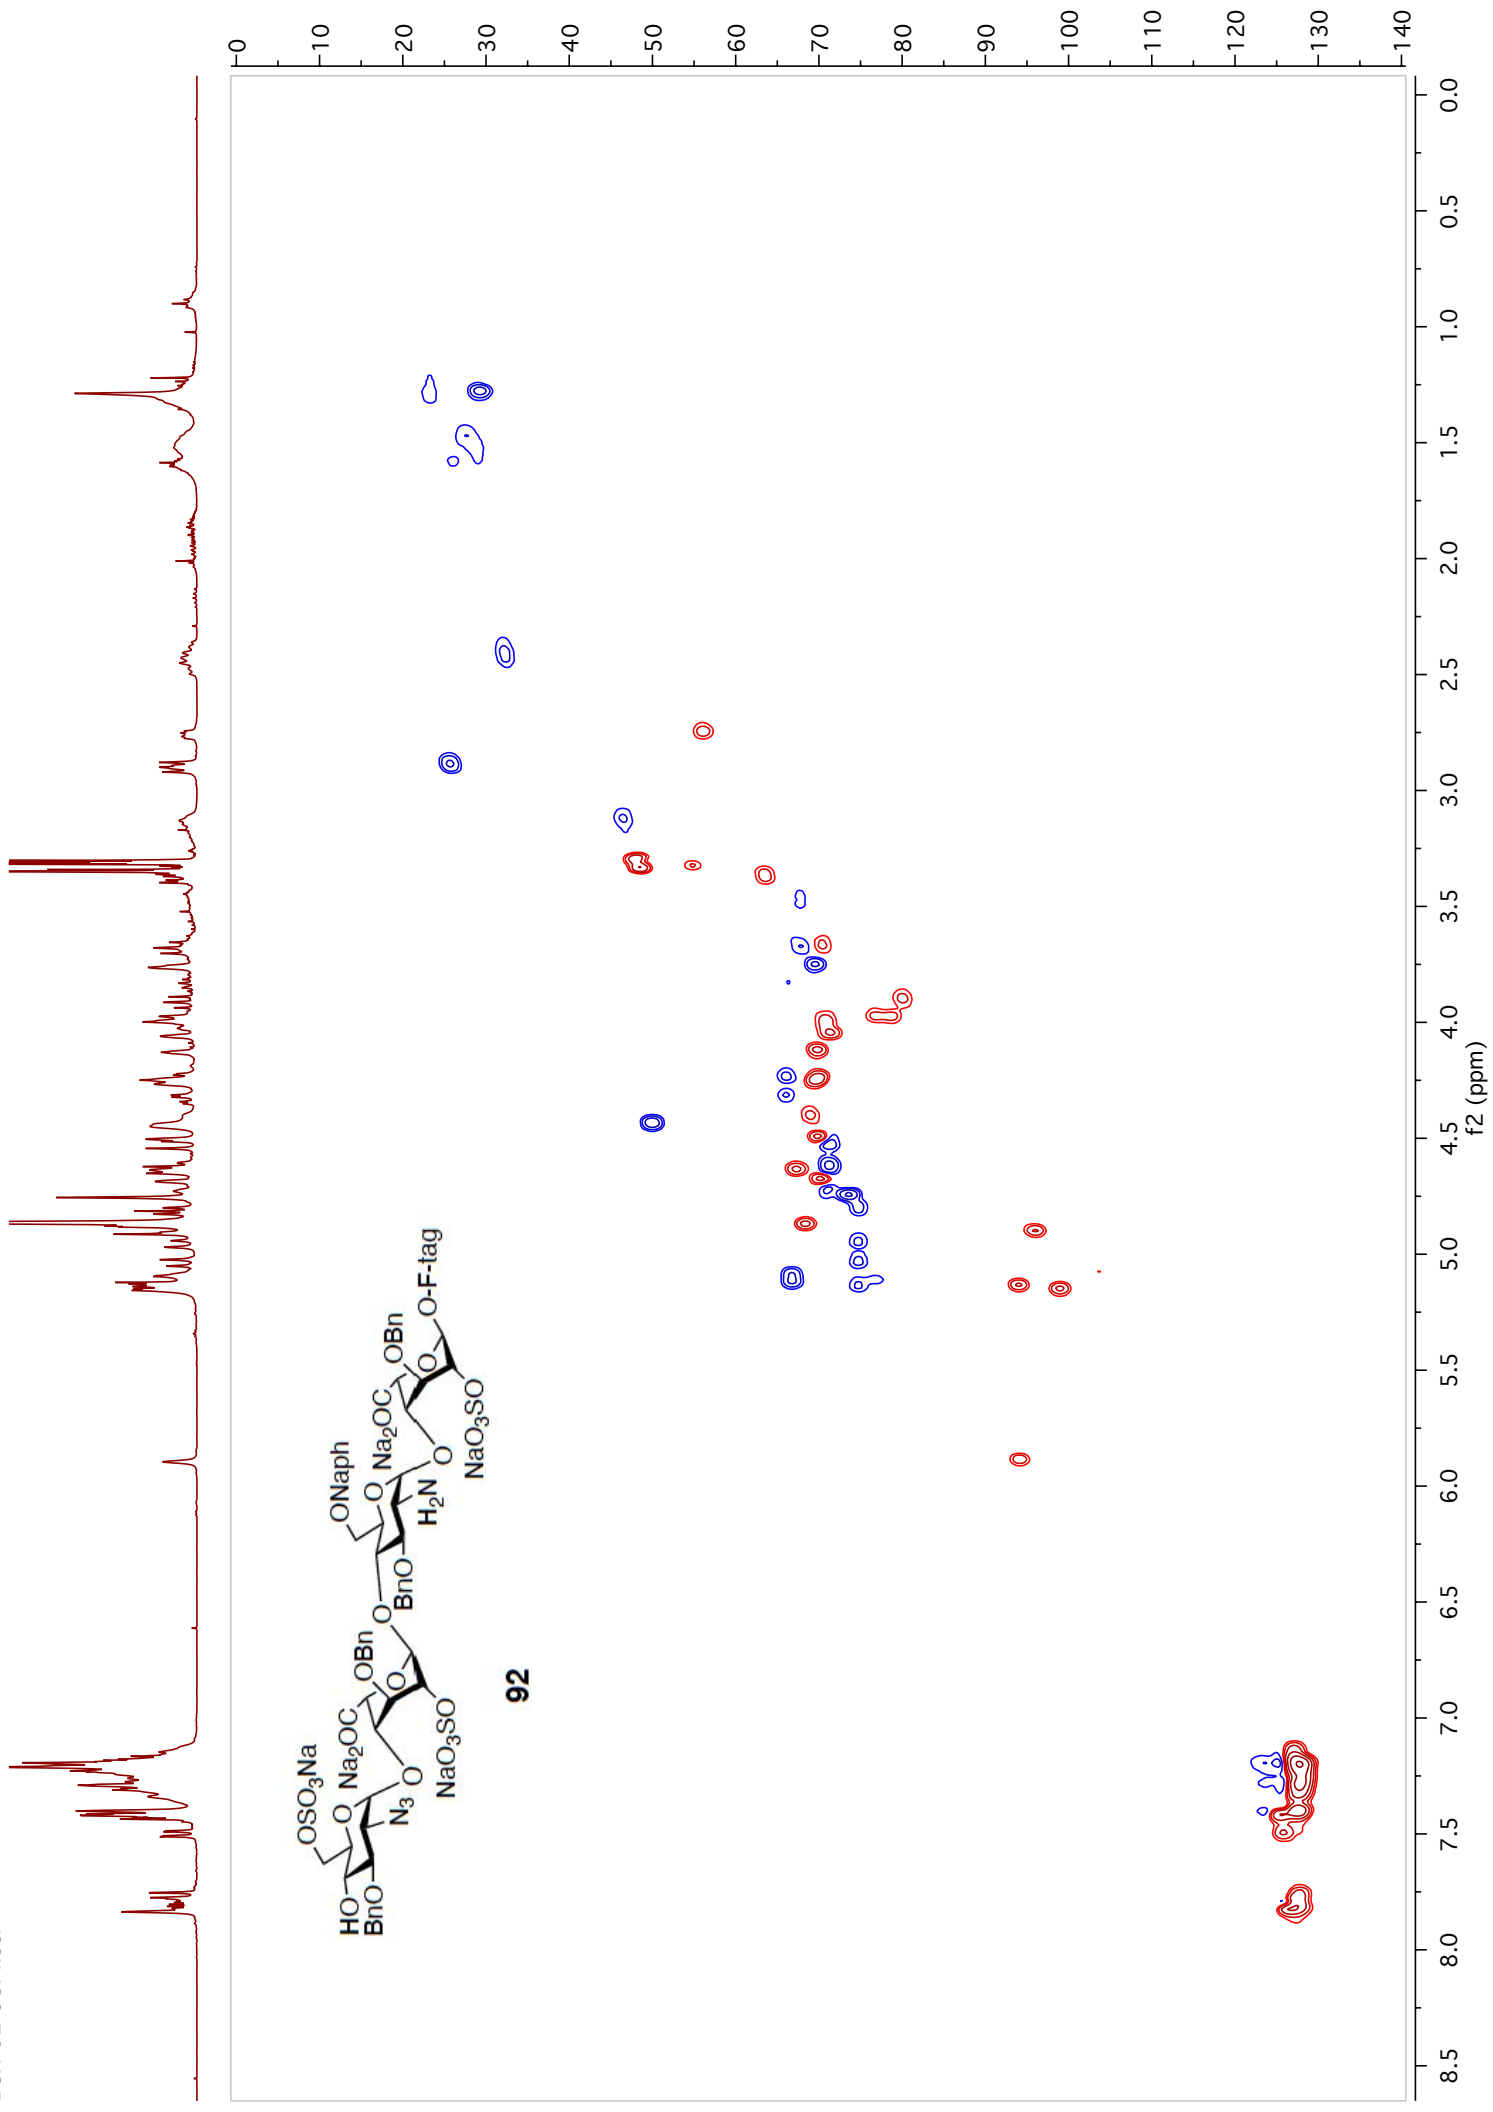

7.31  
7.29  
7.29  
7.28  
7.27  
7.26  
7.25  
7.24  
7.23  
7.23  
7.21  
7.21  
7.20  
5.21  
5.21  
5.18  
5.13  
5.12  
5.10  
5.09  
5.09  
4.75  
4.72  
4.70  
4.70  
4.68  
4.67  
4.65  
4.63  
4.56  
4.46  
4.46  
4.44  
4.40  
4.38  
4.37  
4.27  
4.26  
4.25  
4.19  
4.17  
4.16  
4.11  
4.09  
4.07  
3.95  
3.92  
3.87  
3.86  
3.85  
3.85  
3.85  
3.84  
3.84  
3.83  
3.83  
3.82  
3.81  
3.80  
3.80  
3.79  
3.78  
3.78  
3.77  
3.15  
3.14  
3.13  
3.13  
2.93  
2.91  
2.90  
2.89  
2.46

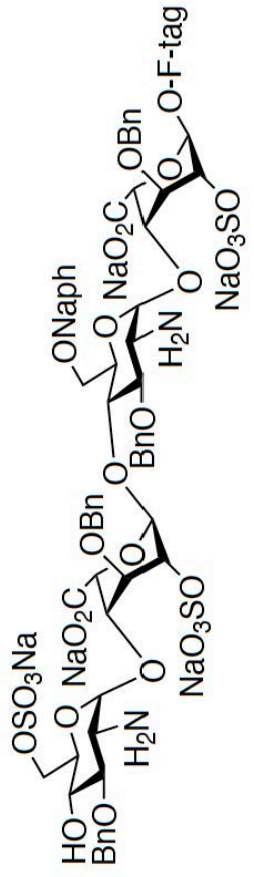

93

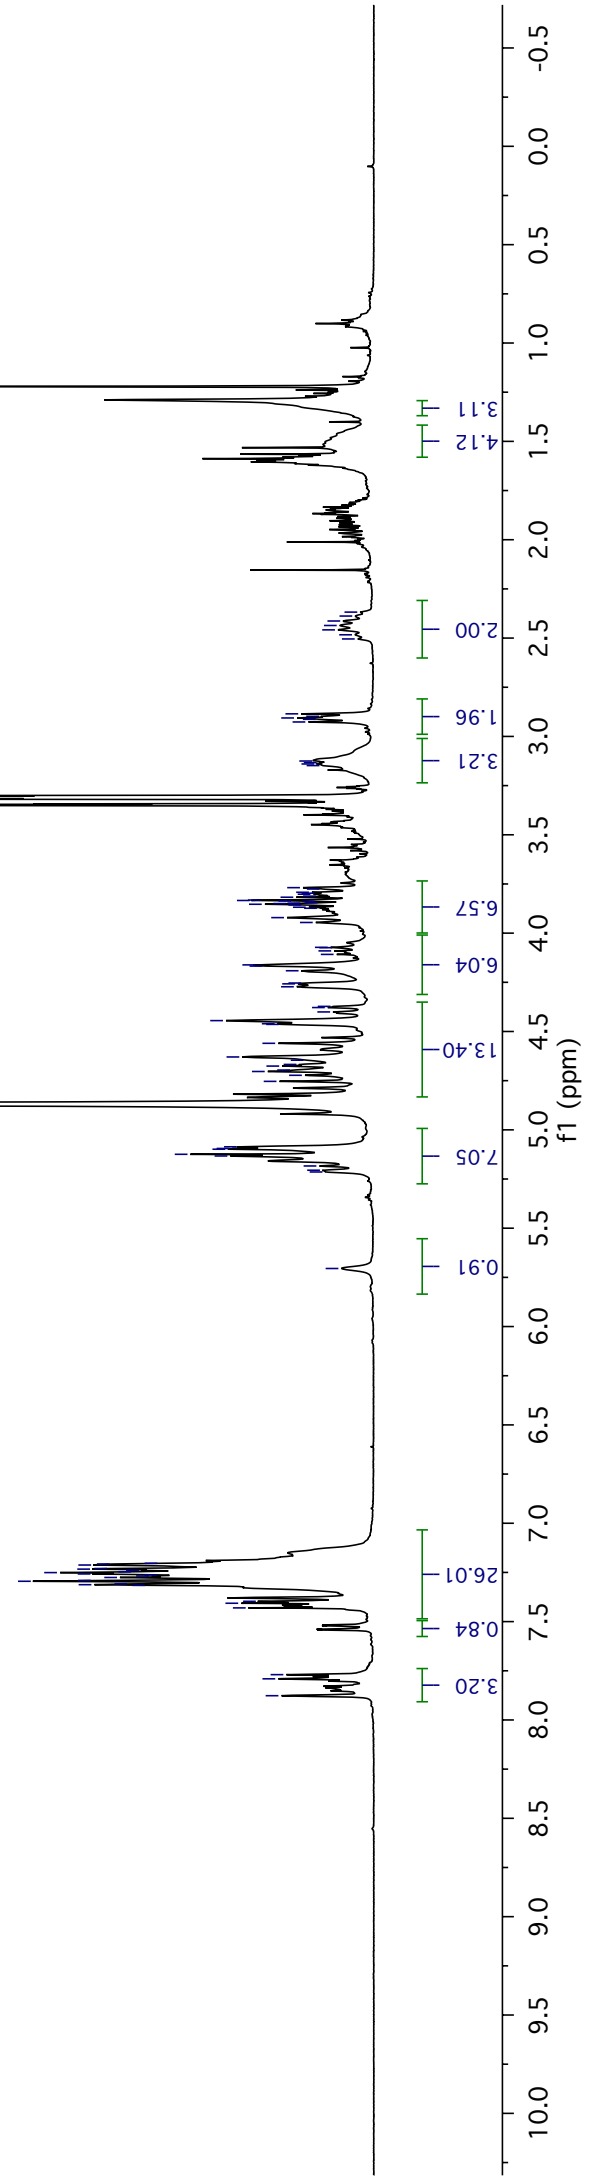



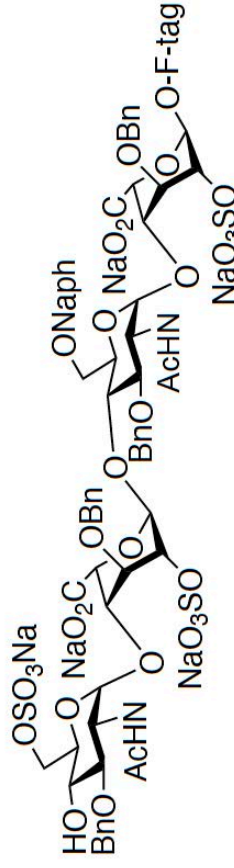

94

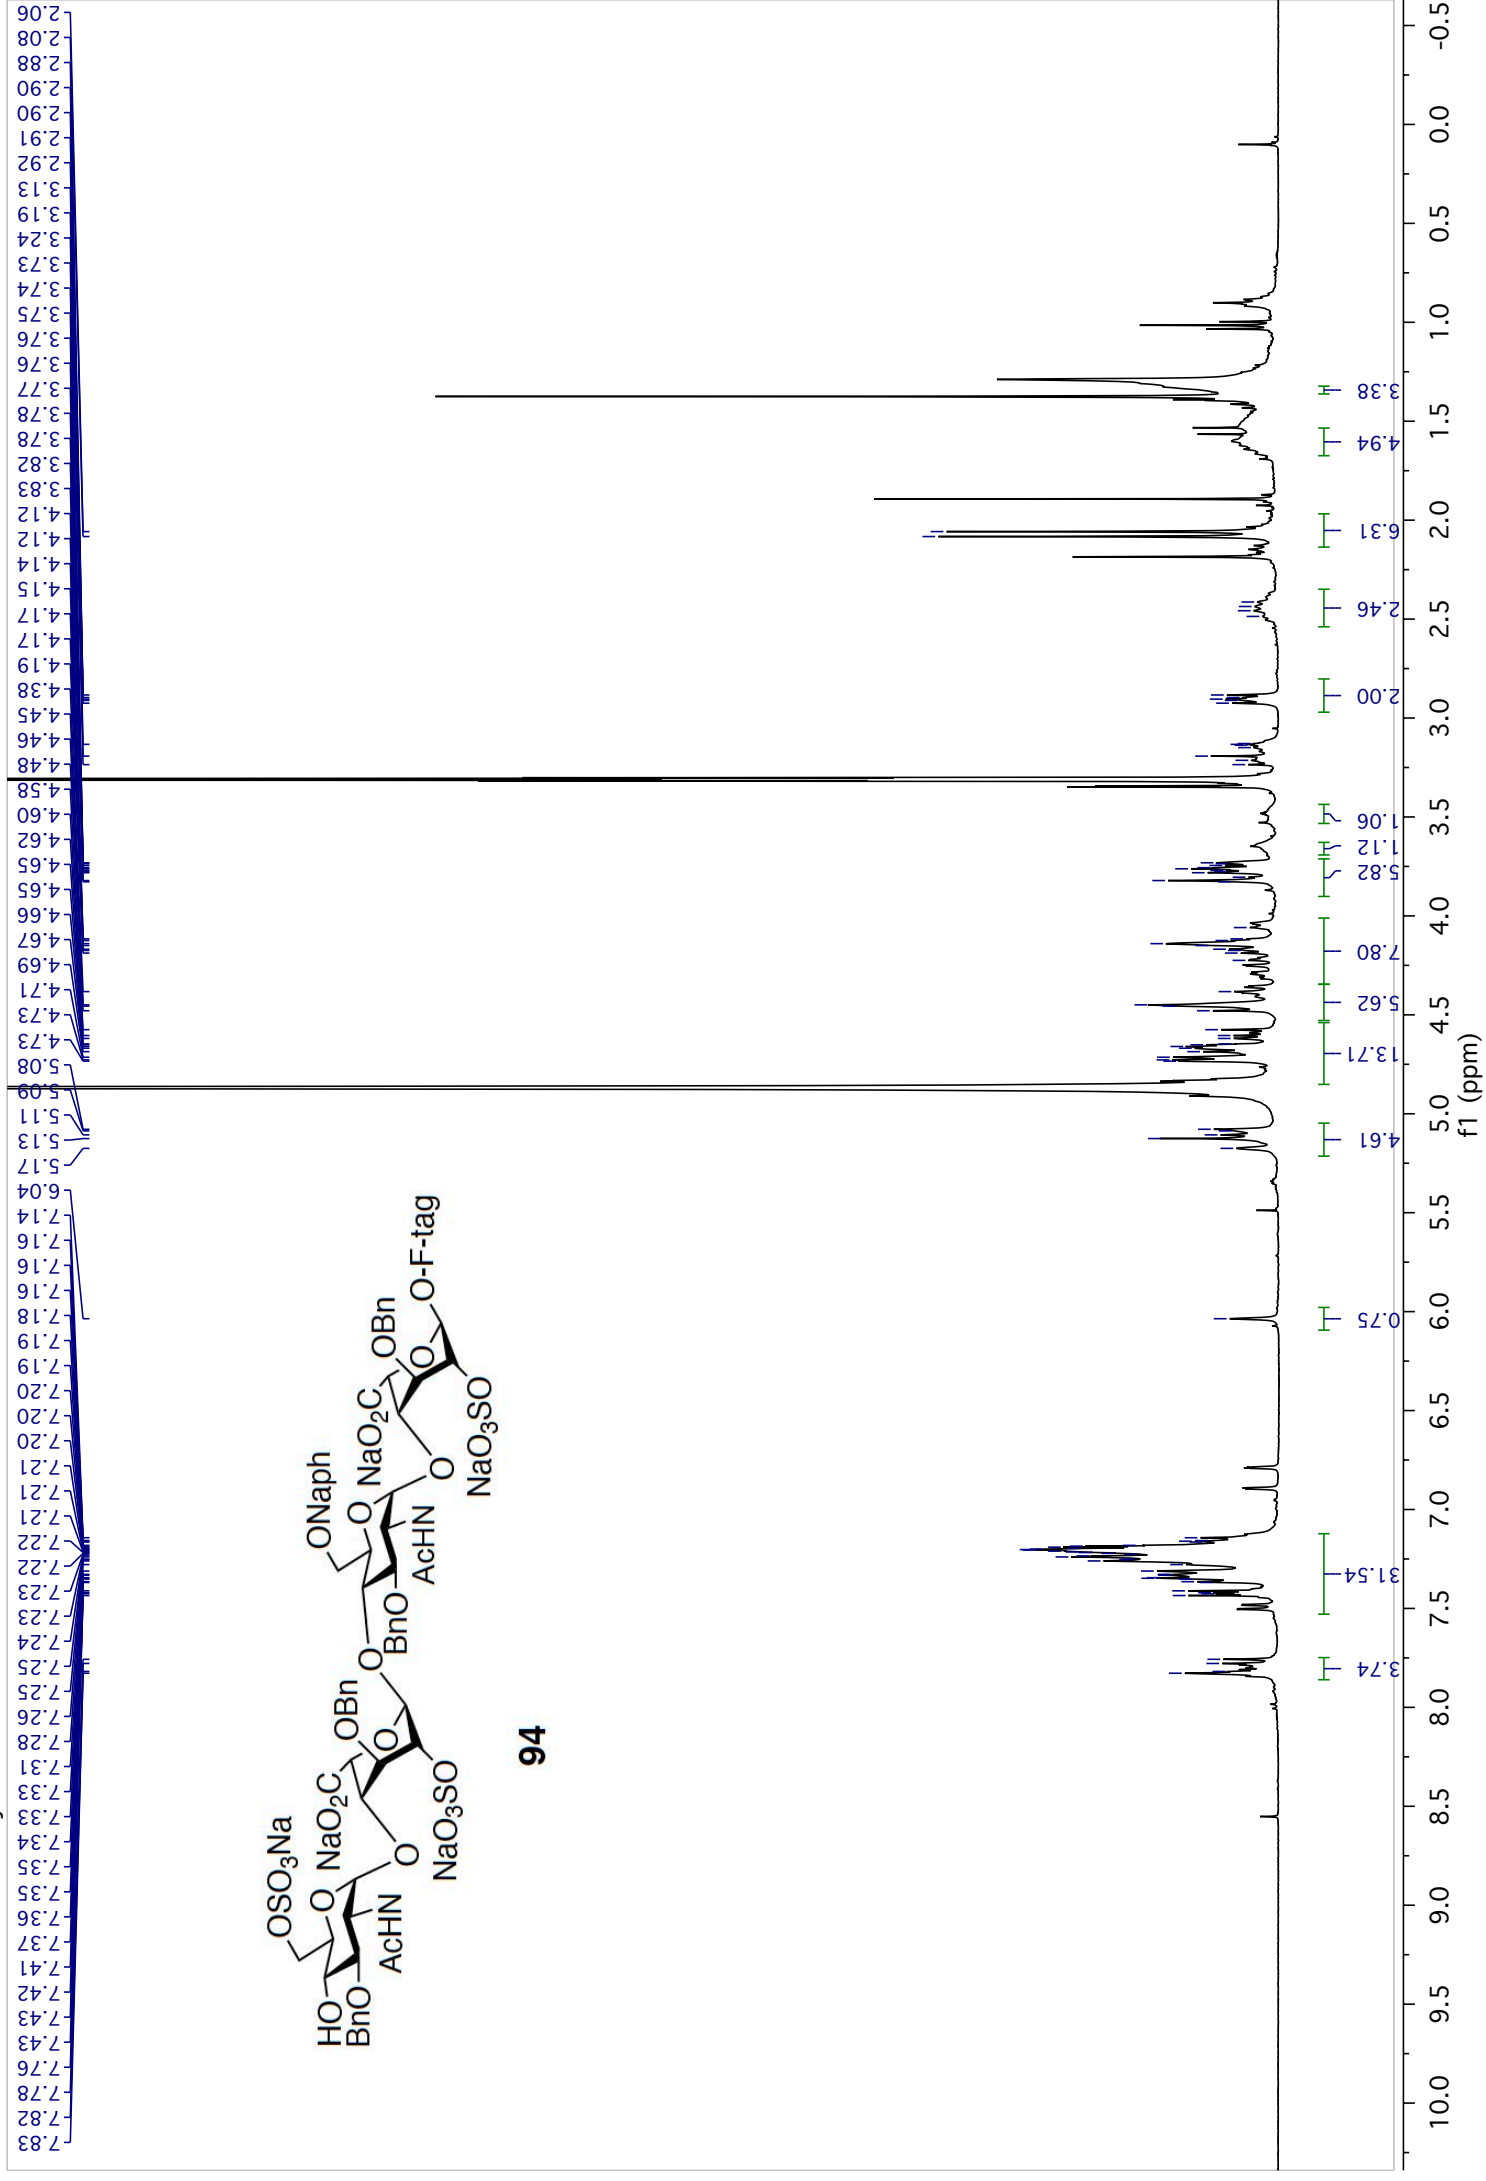

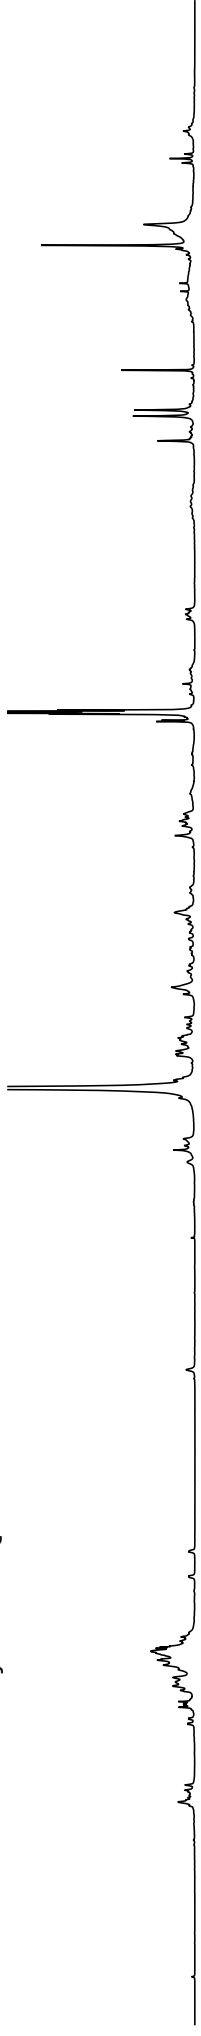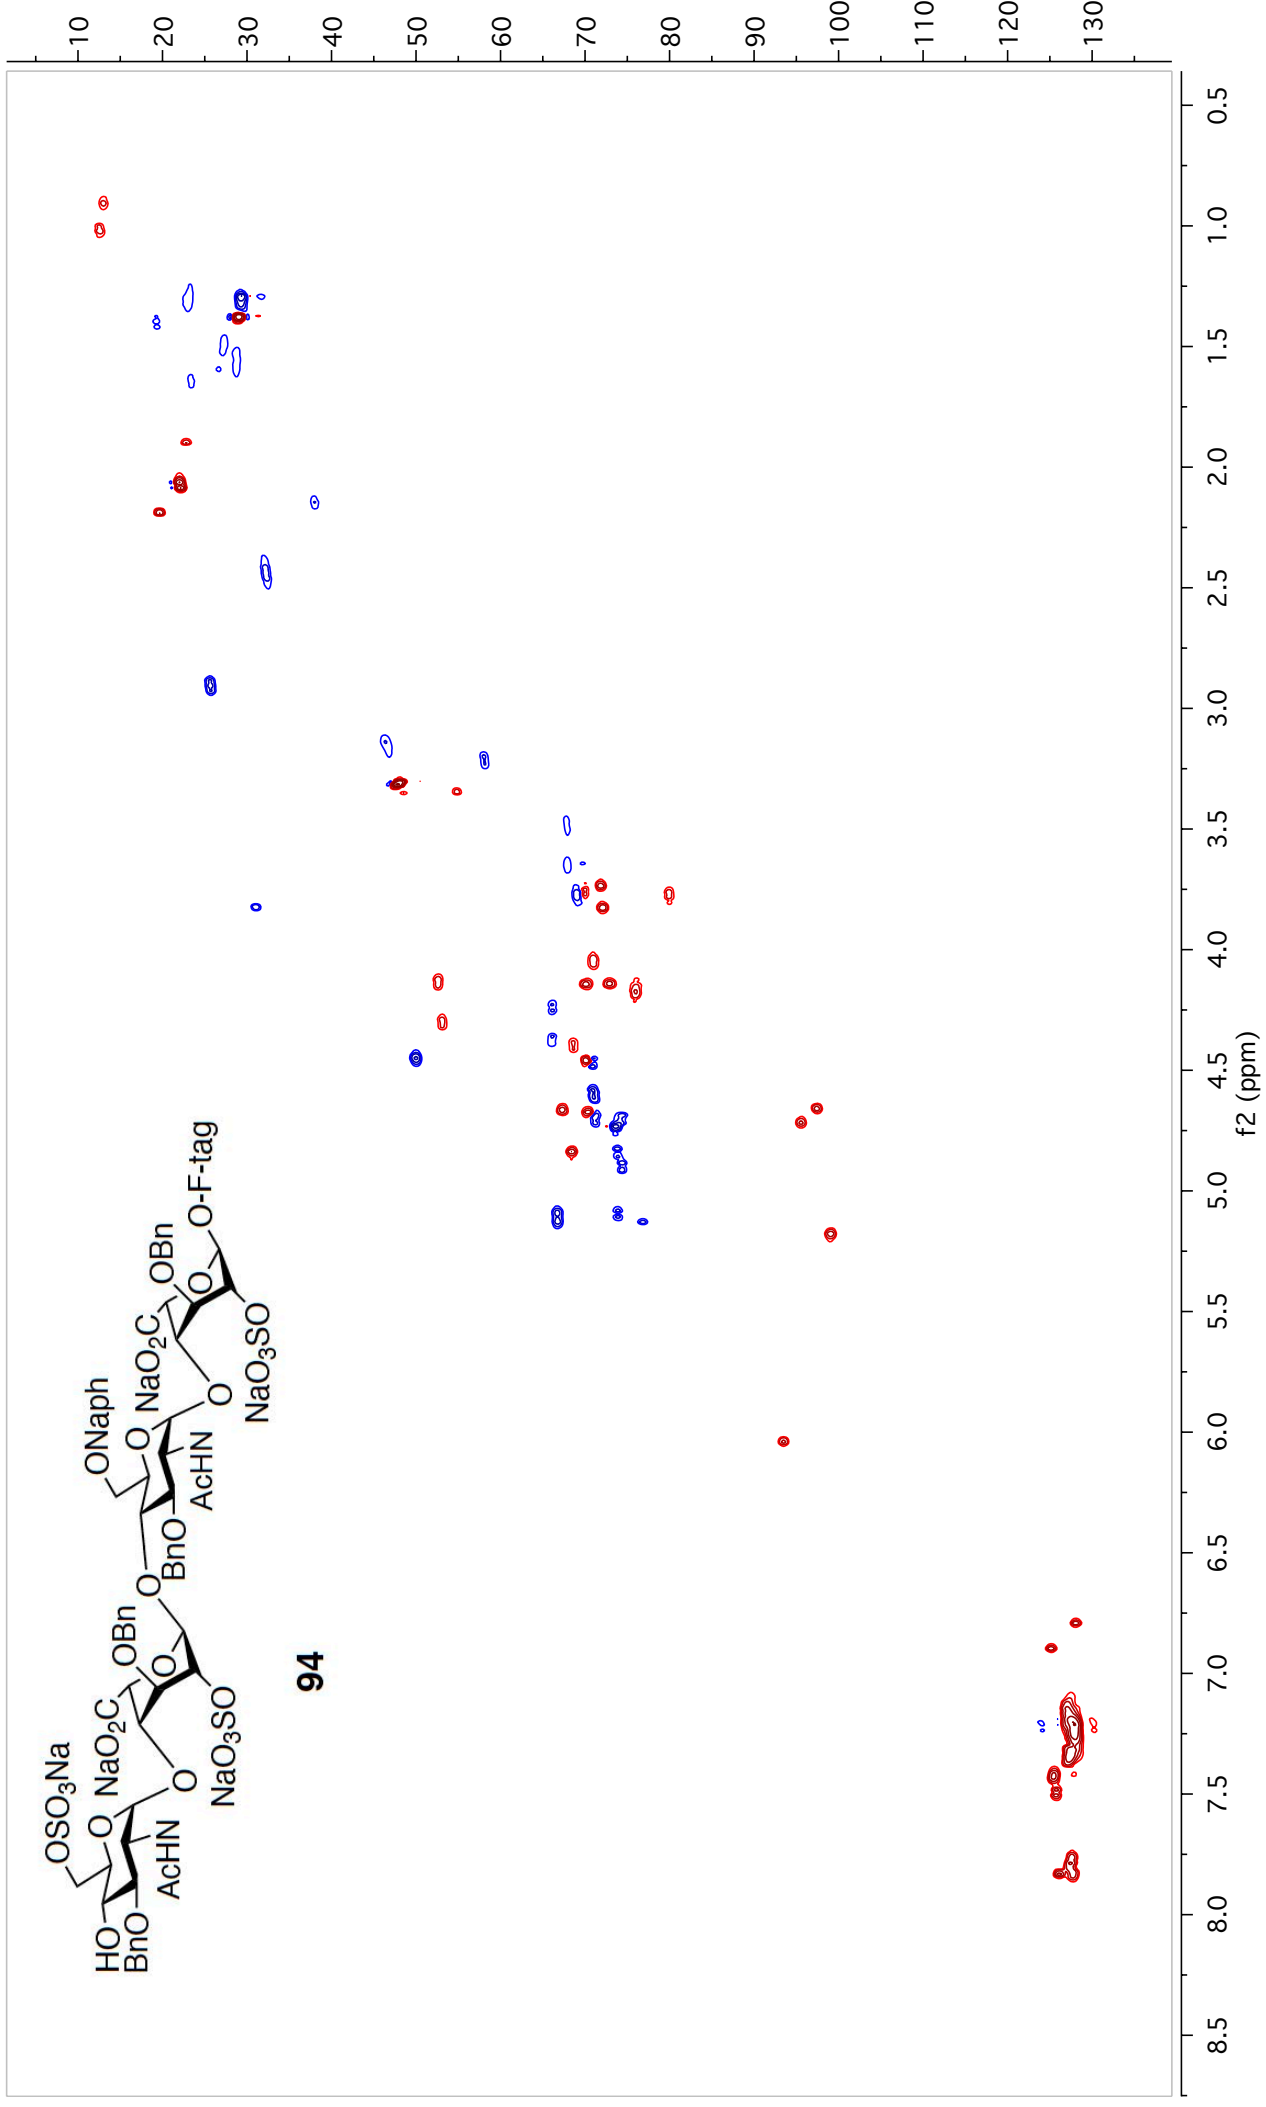

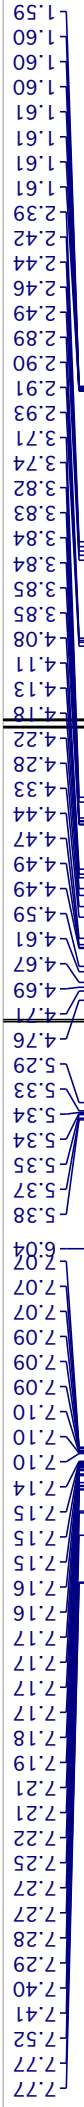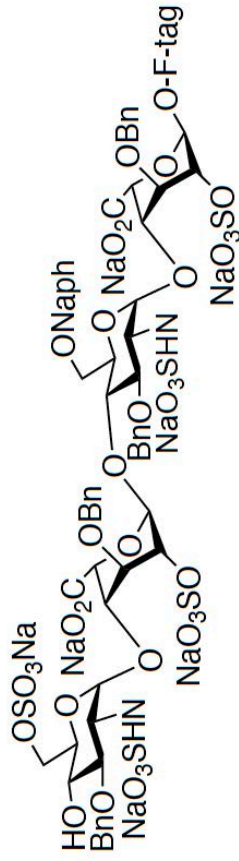

95

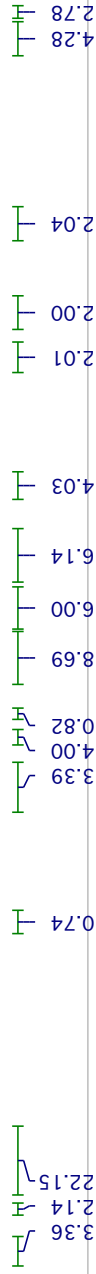

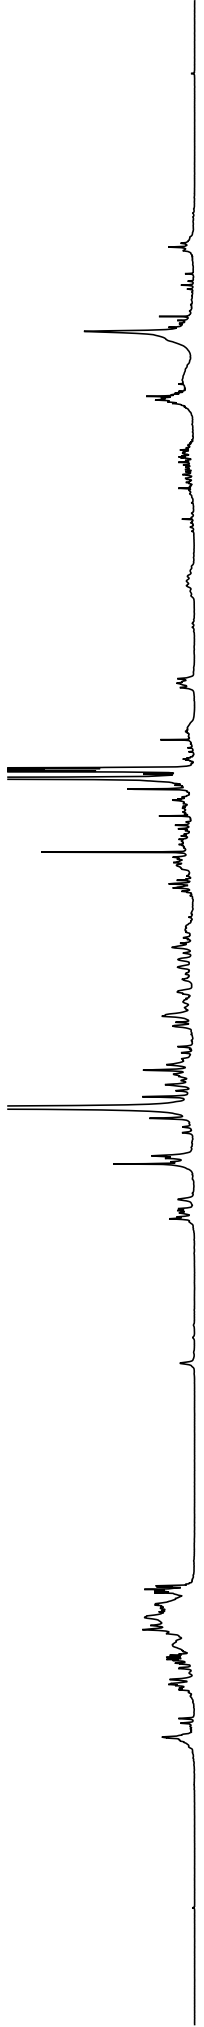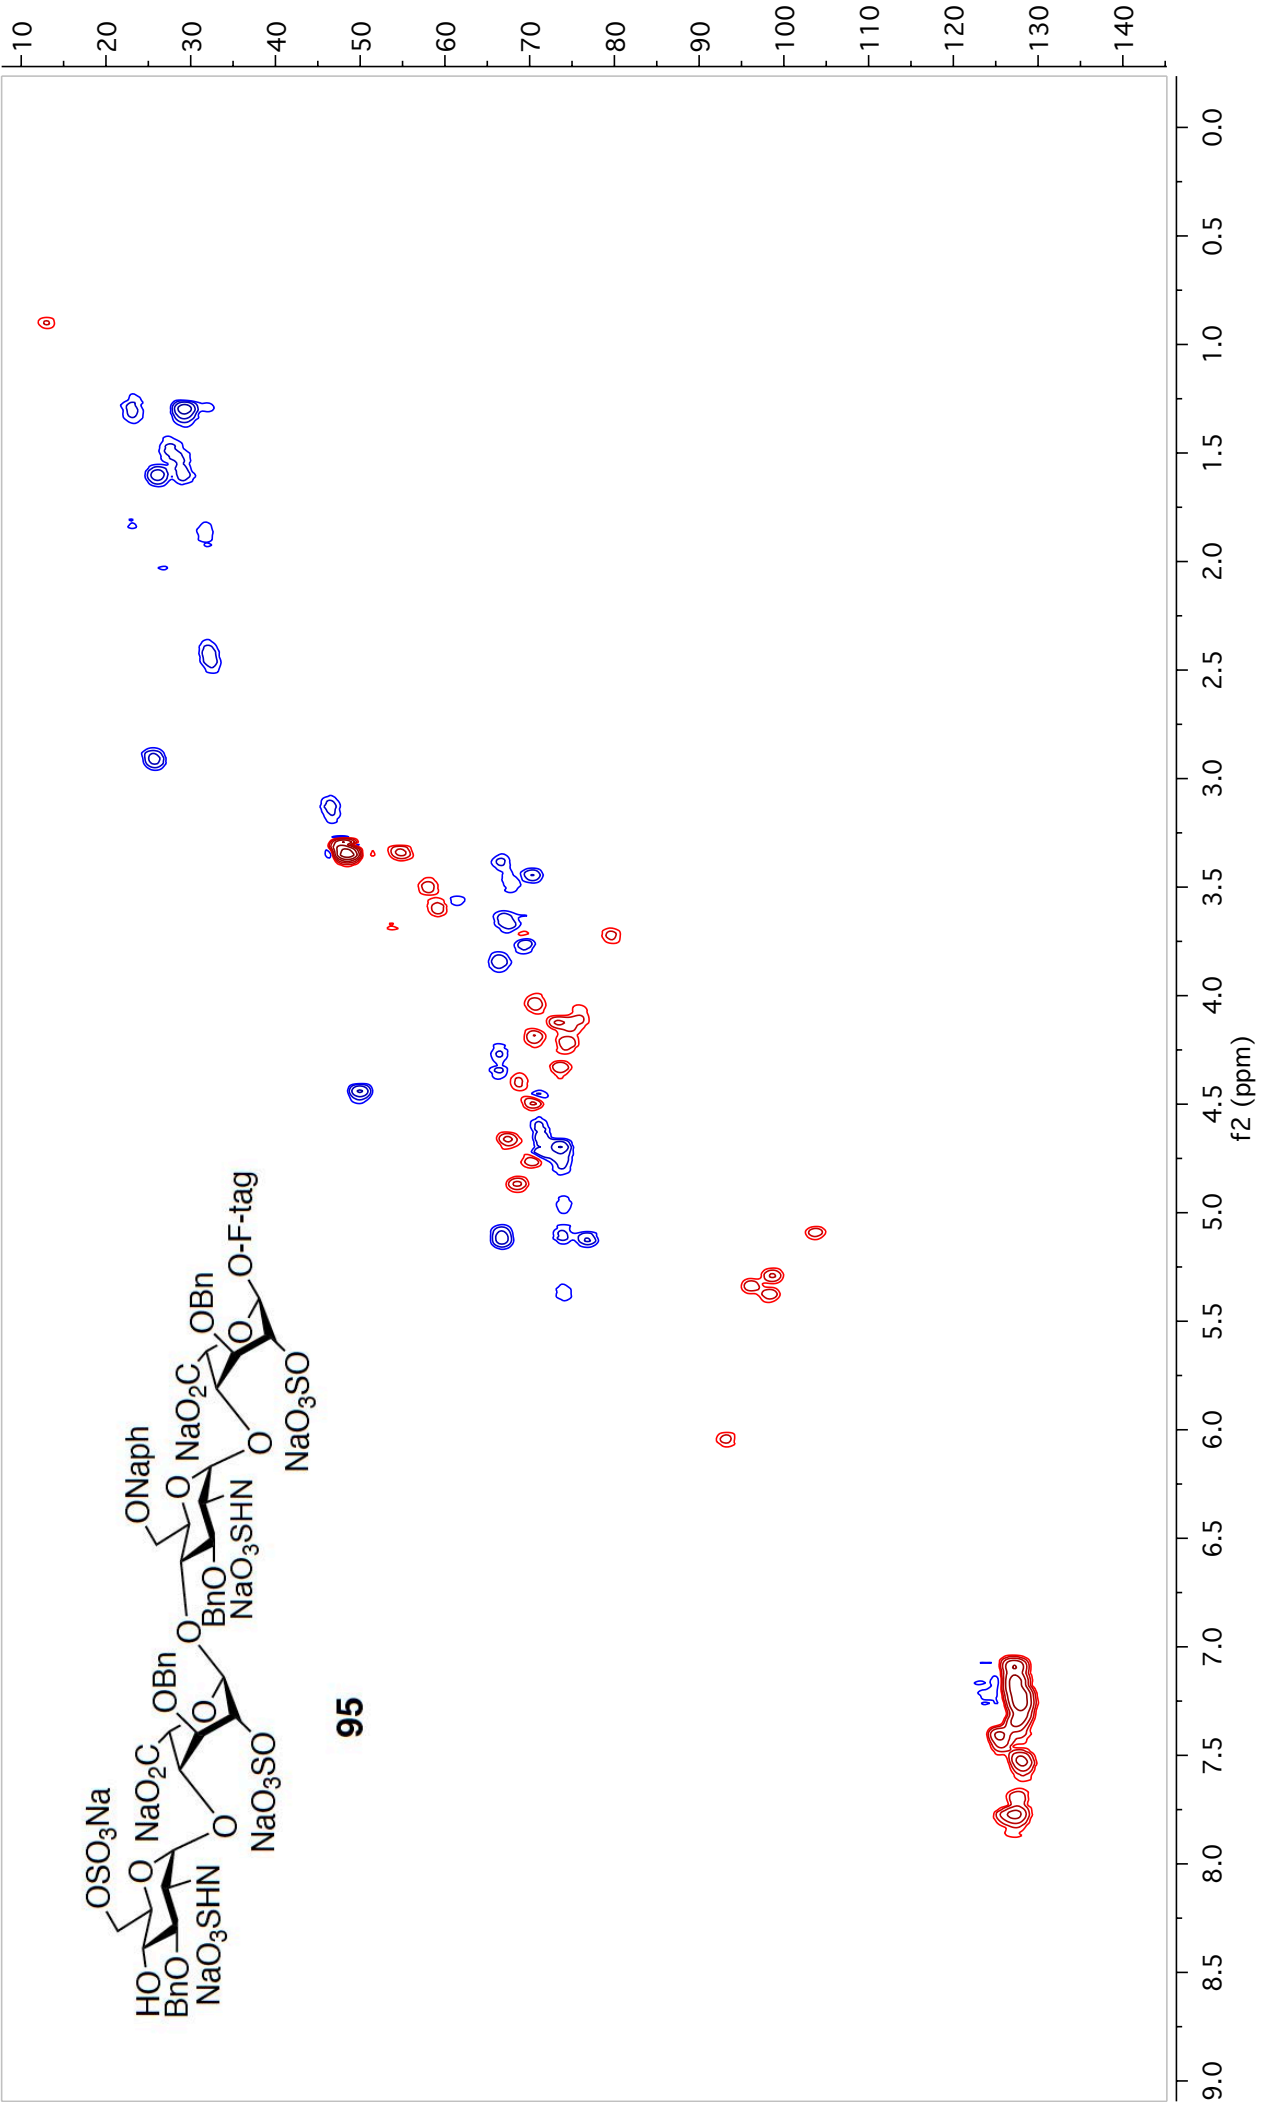



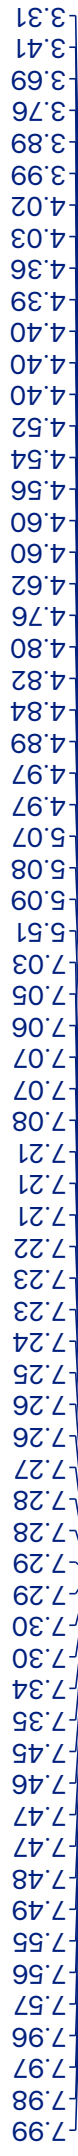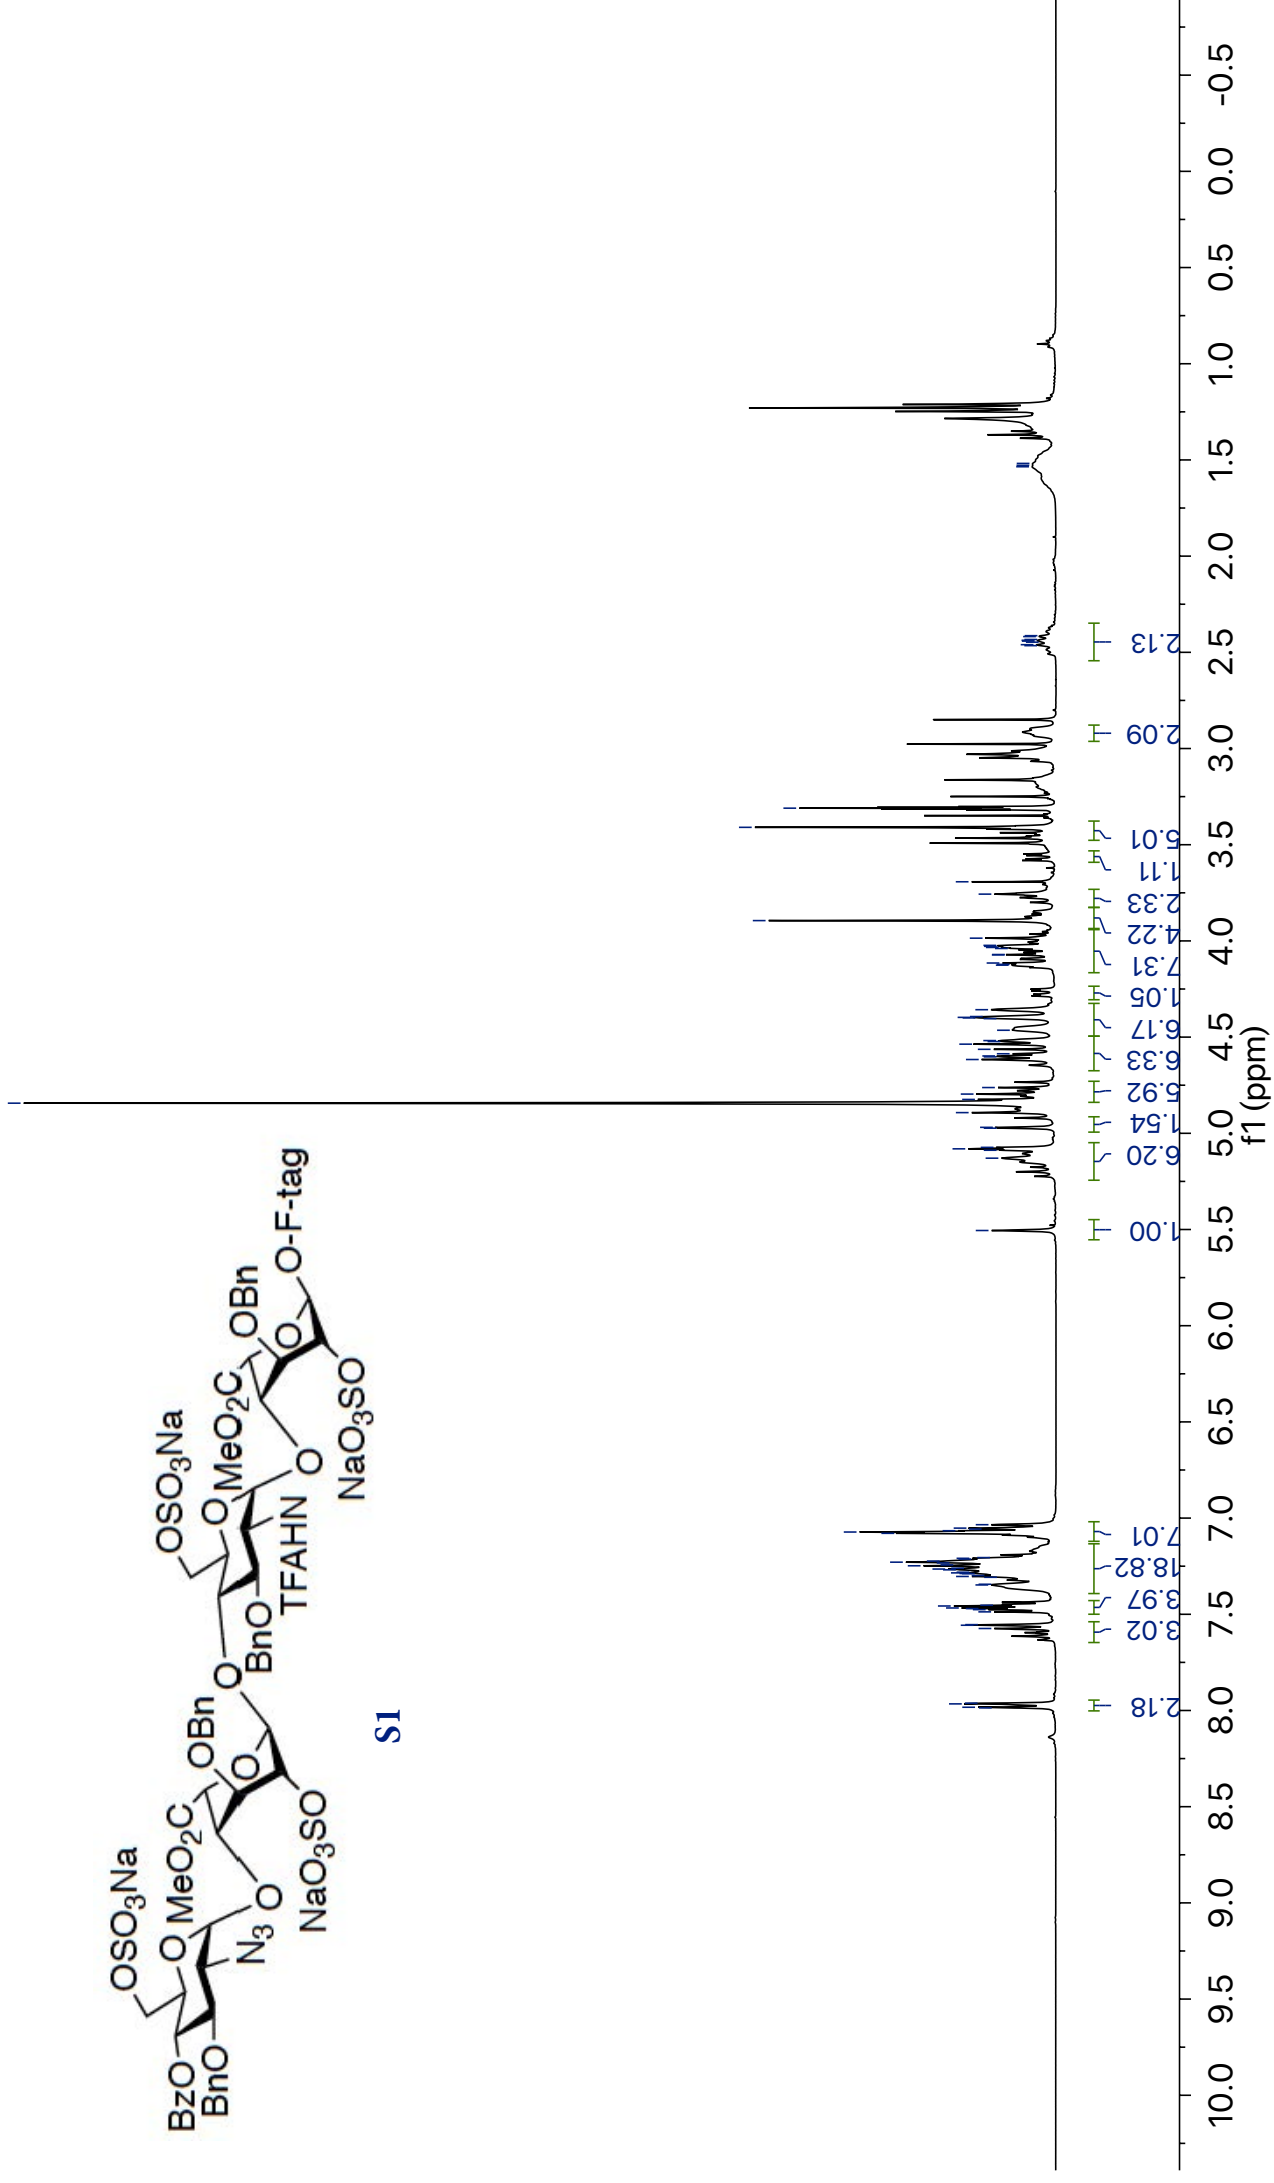

WL-2-299-D6-C2-B6-A2-Tetra-O-Sulfation-H.3.1.1r—

170.77  
170.43  
165.41  
137.88  
137.69  
137.61  
137.44  
133.18  
129.46  
128.49  
128.31  
128.25  
128.22  
128.09  
127.96  
127.90  
127.71  
127.45  
127.41  
127.30  
127.23  
126.91

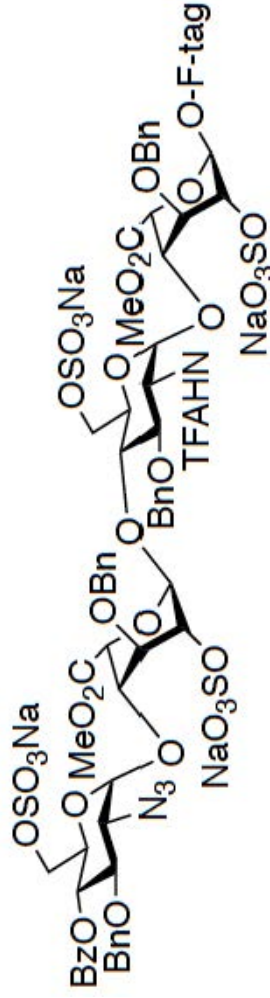

S1

99.88  
97.51  
97.08  
95.44  
78.02  
77.37  
75.04  
74.89  
72.47  
72.19  
71.65  
71.61  
71.46  
70.71  
70.56  
70.11  
69.46  
69.27  
67.99  
66.73  
66.21  
65.93  
65.73  
63.86  
63.86  
53.86  
51.97  
51.74  
50.12  
49.93  
46.32  
32.20  
28.78  
27.55  
25.65  
23.16

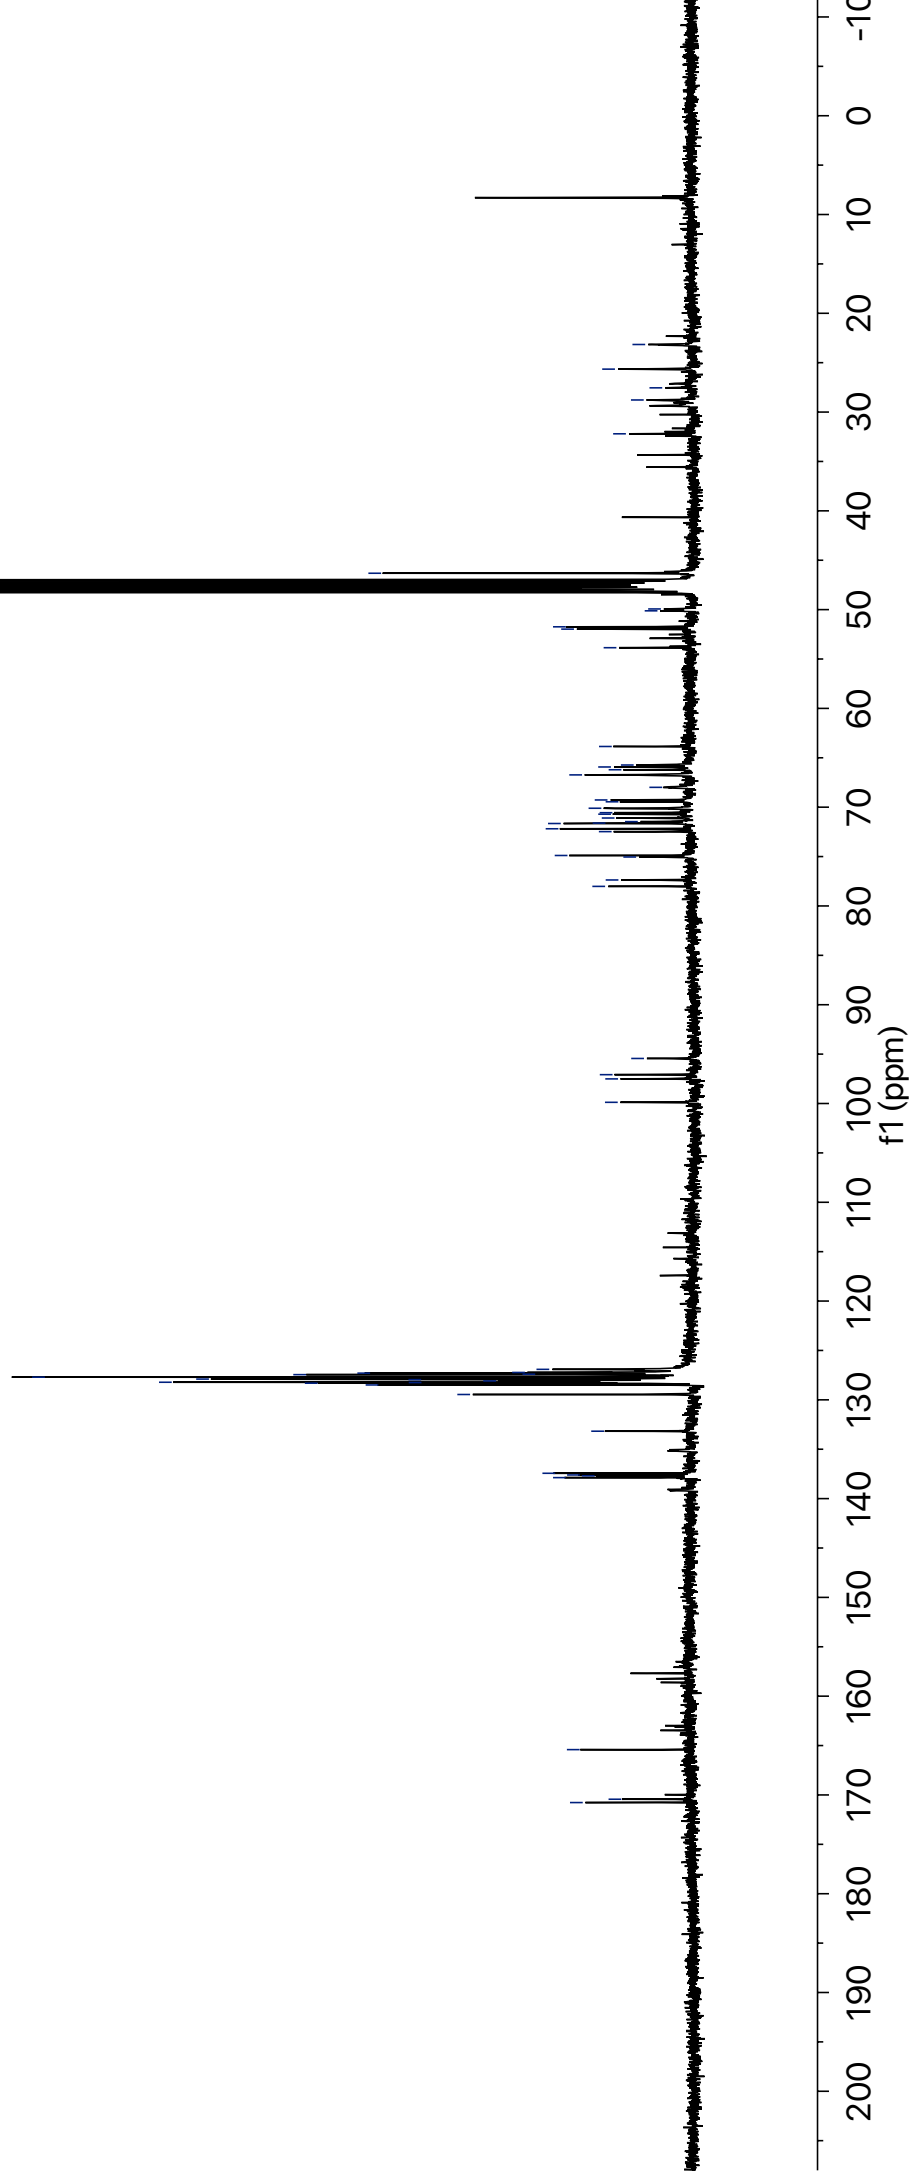

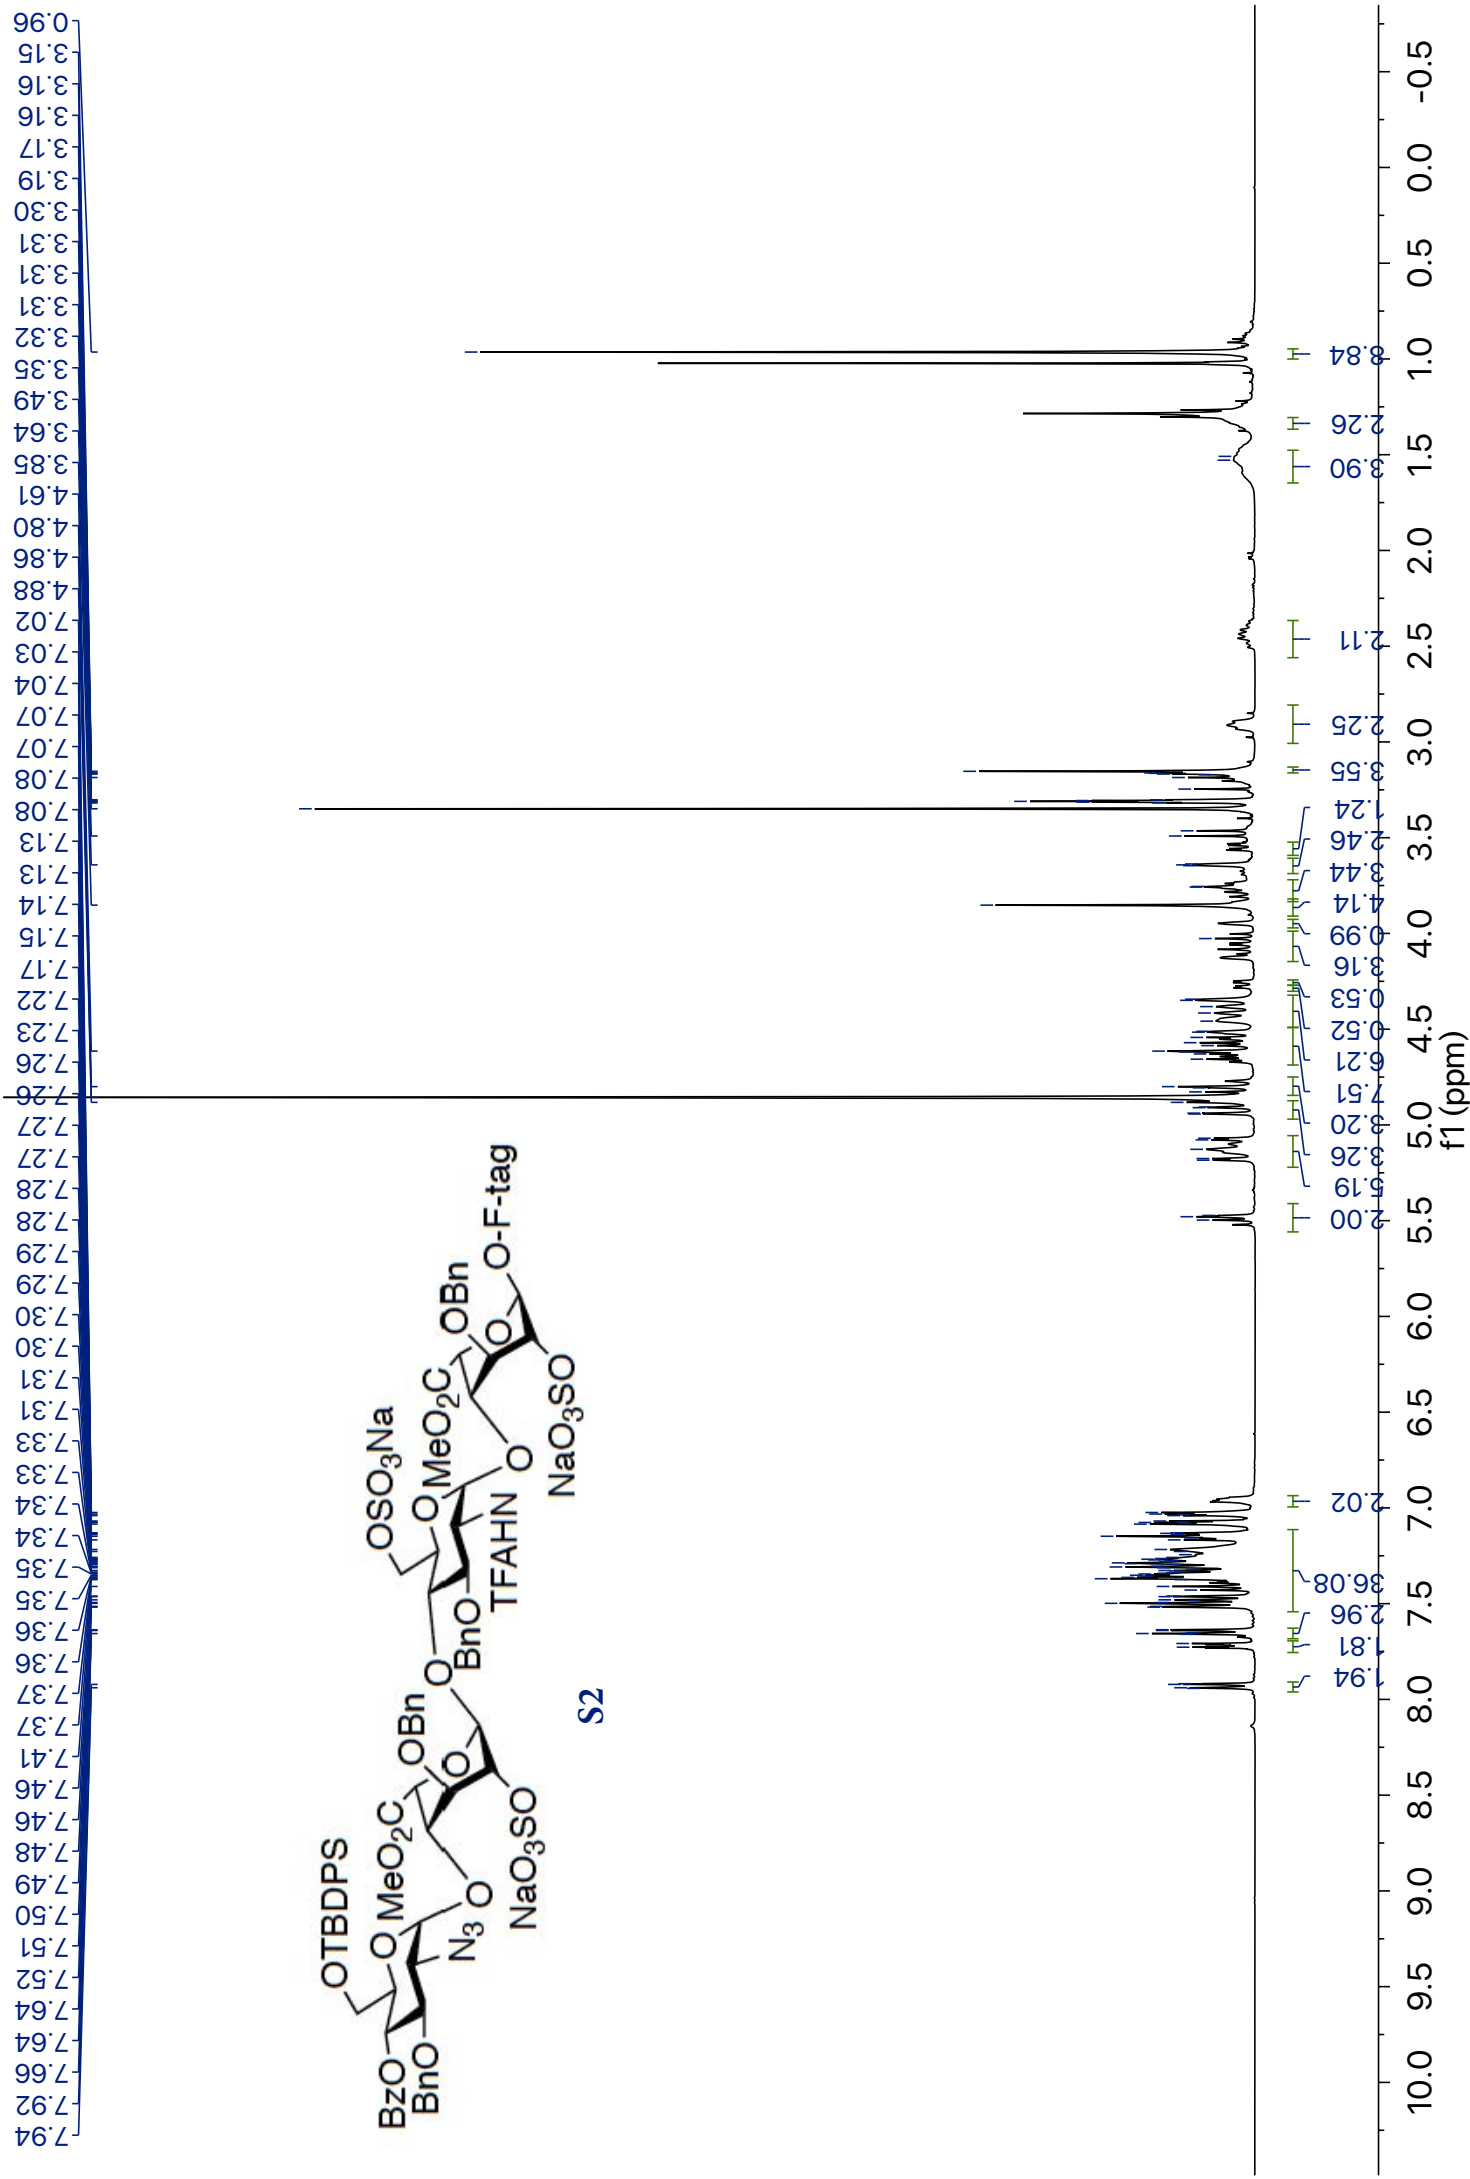

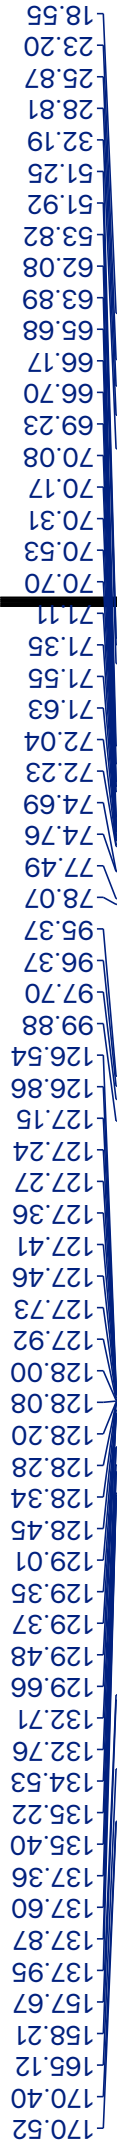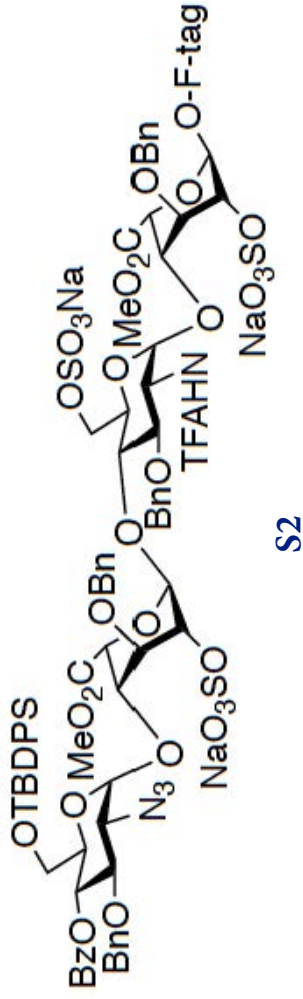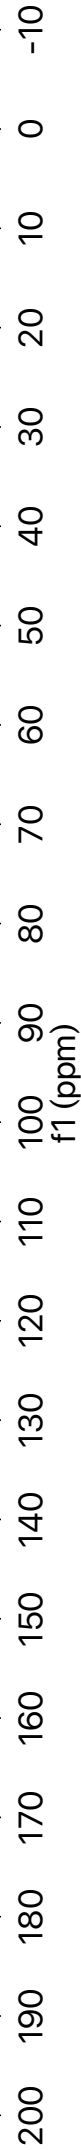



WL-2-273-D6-B6-A2-tri-O-sulfation-C.1.1.r —

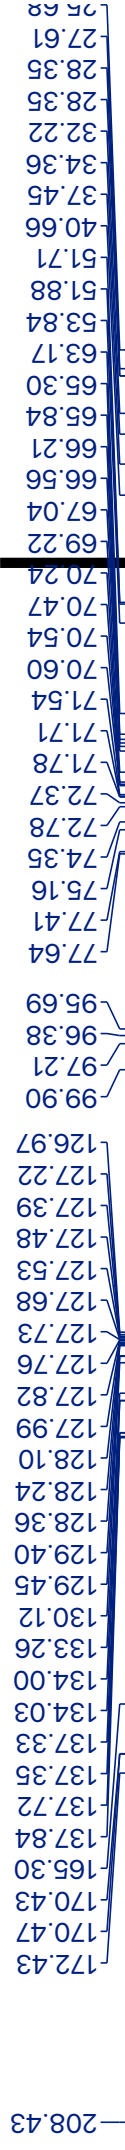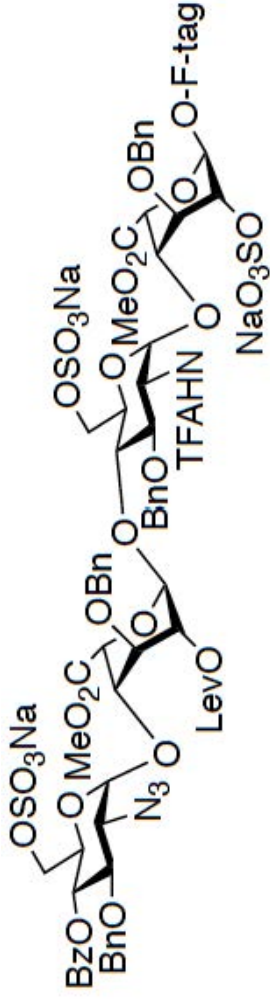

S3

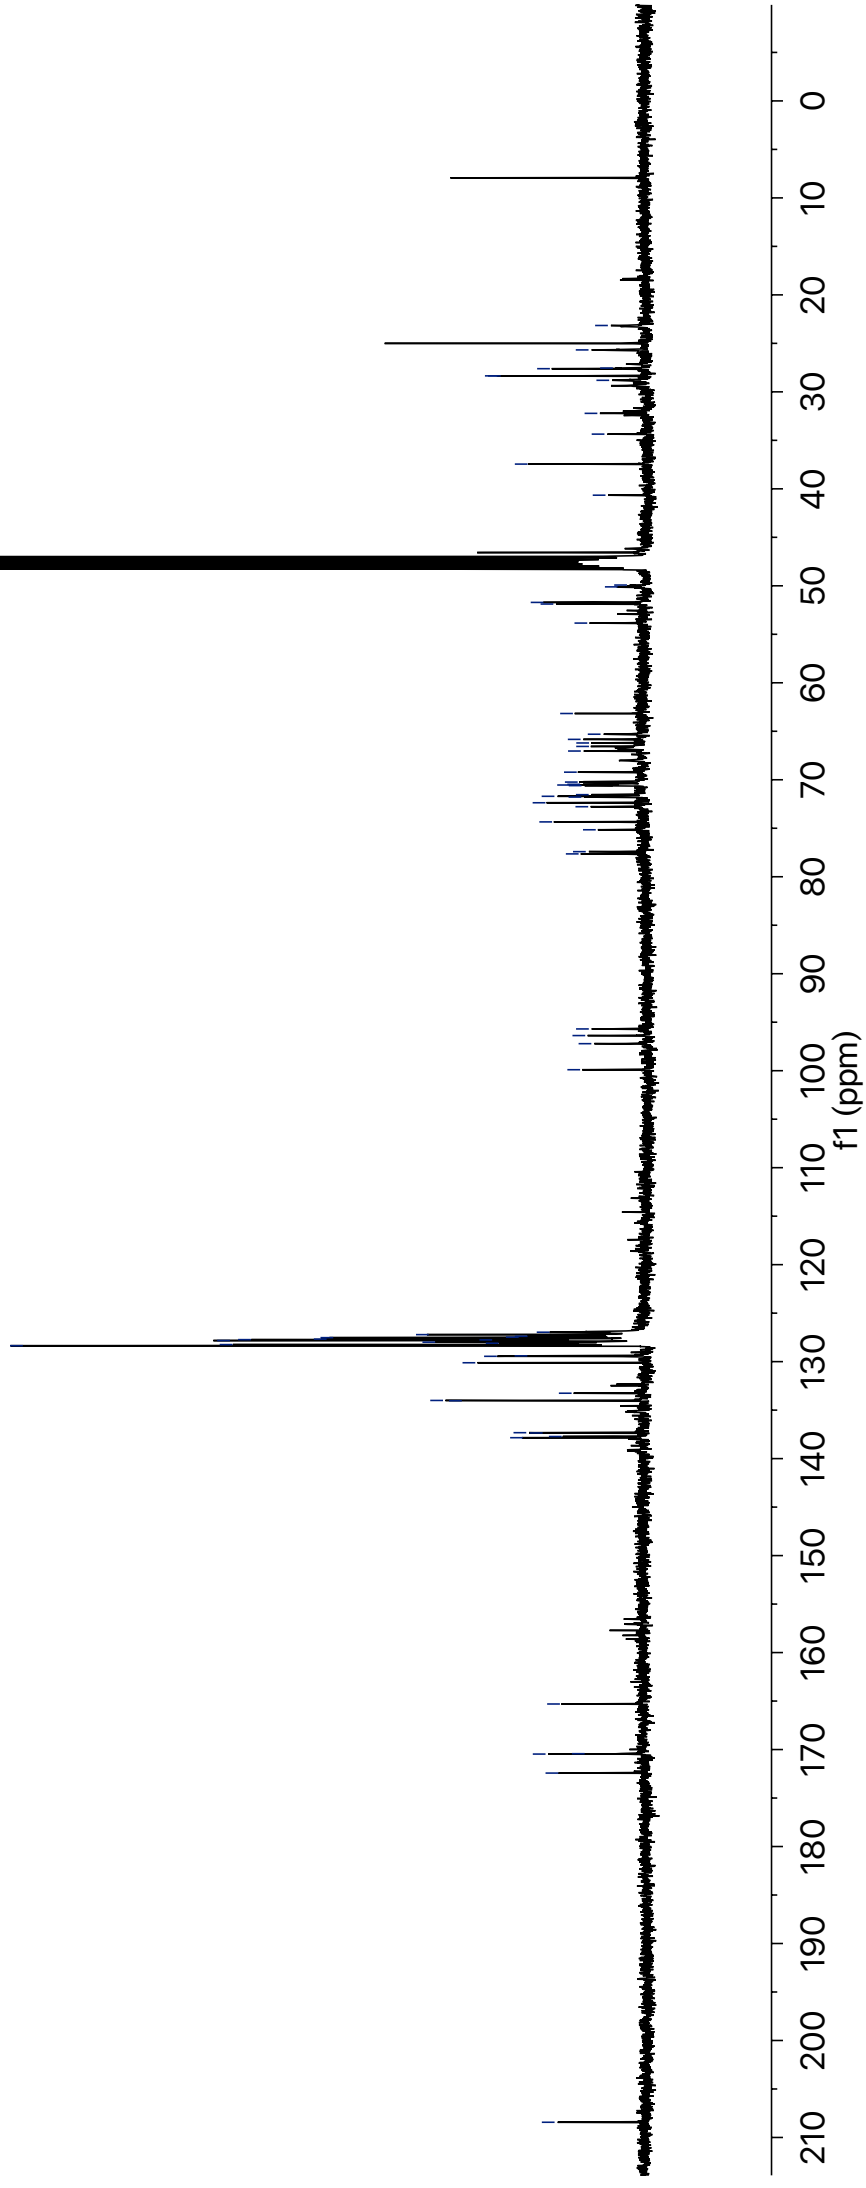

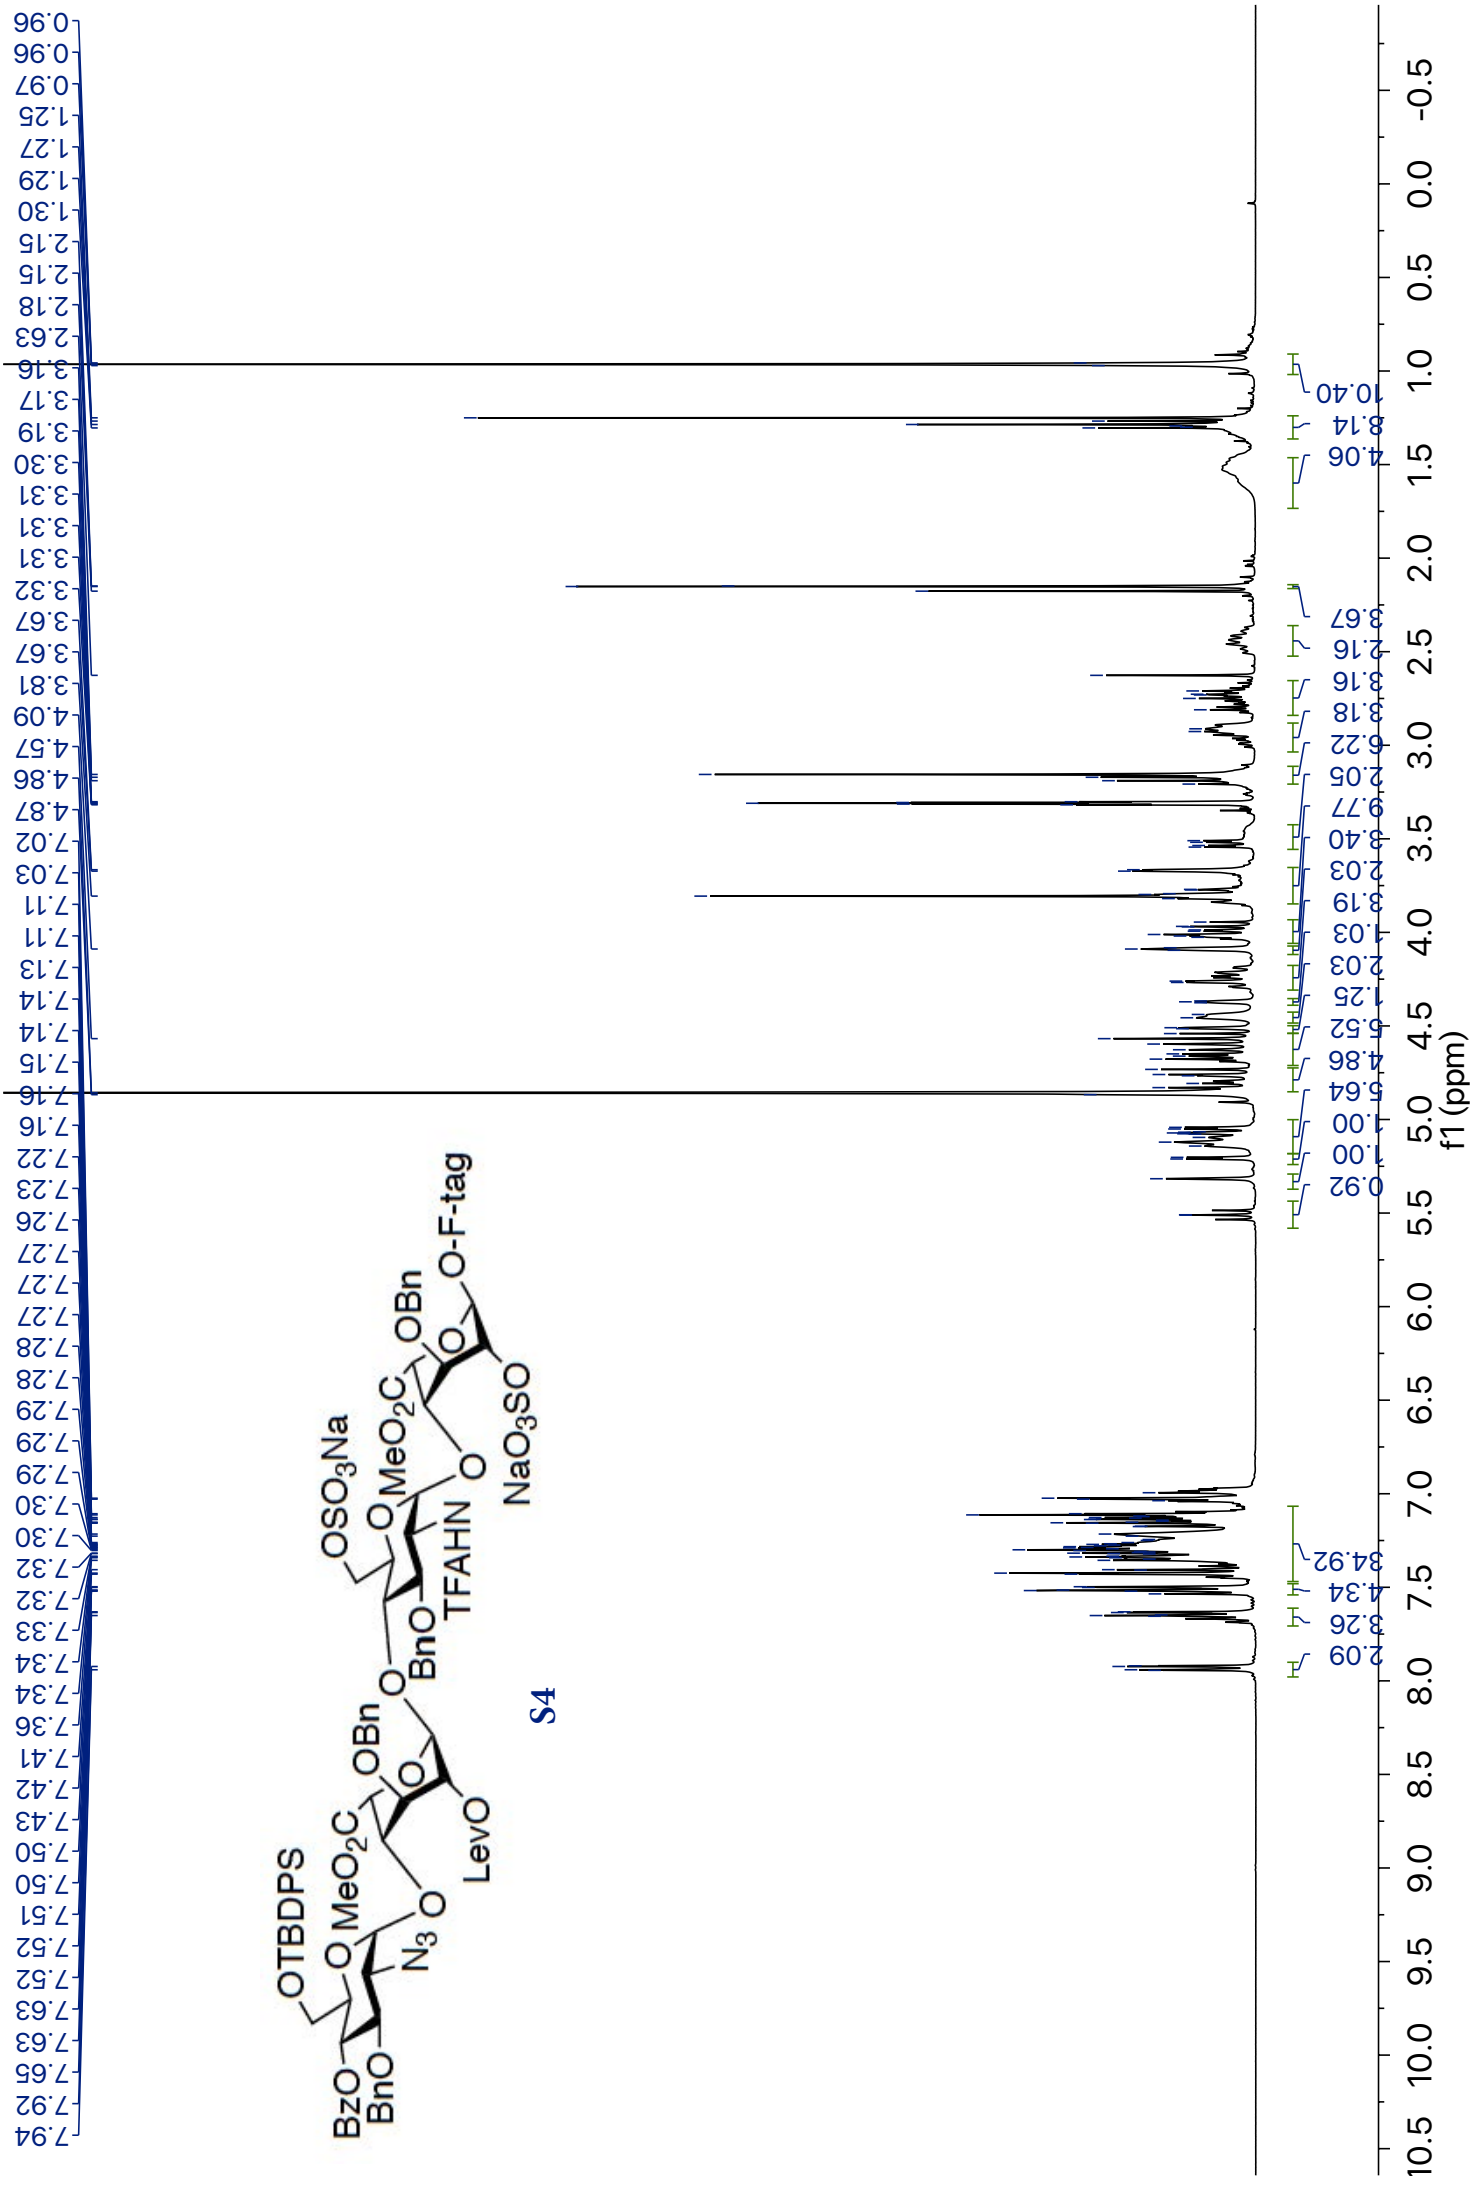

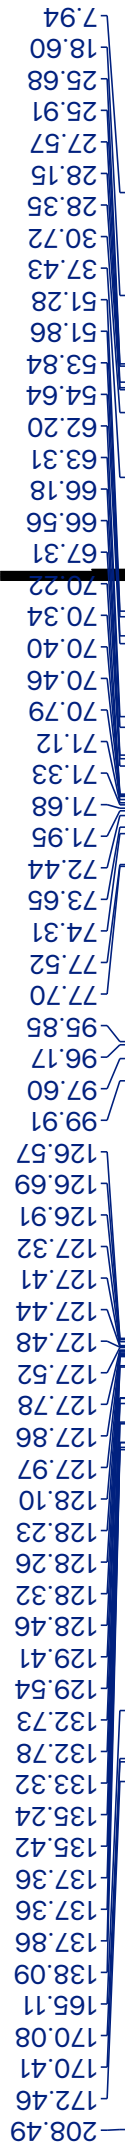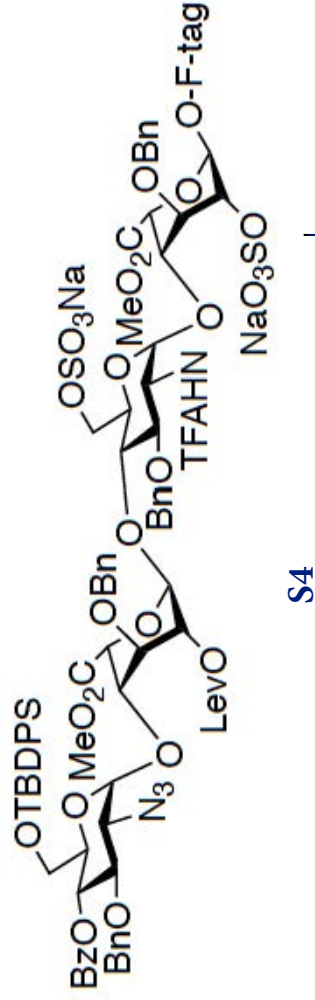

S4

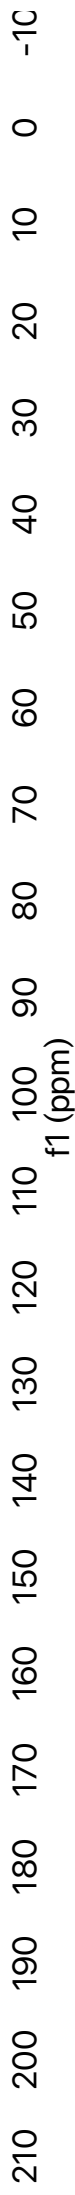





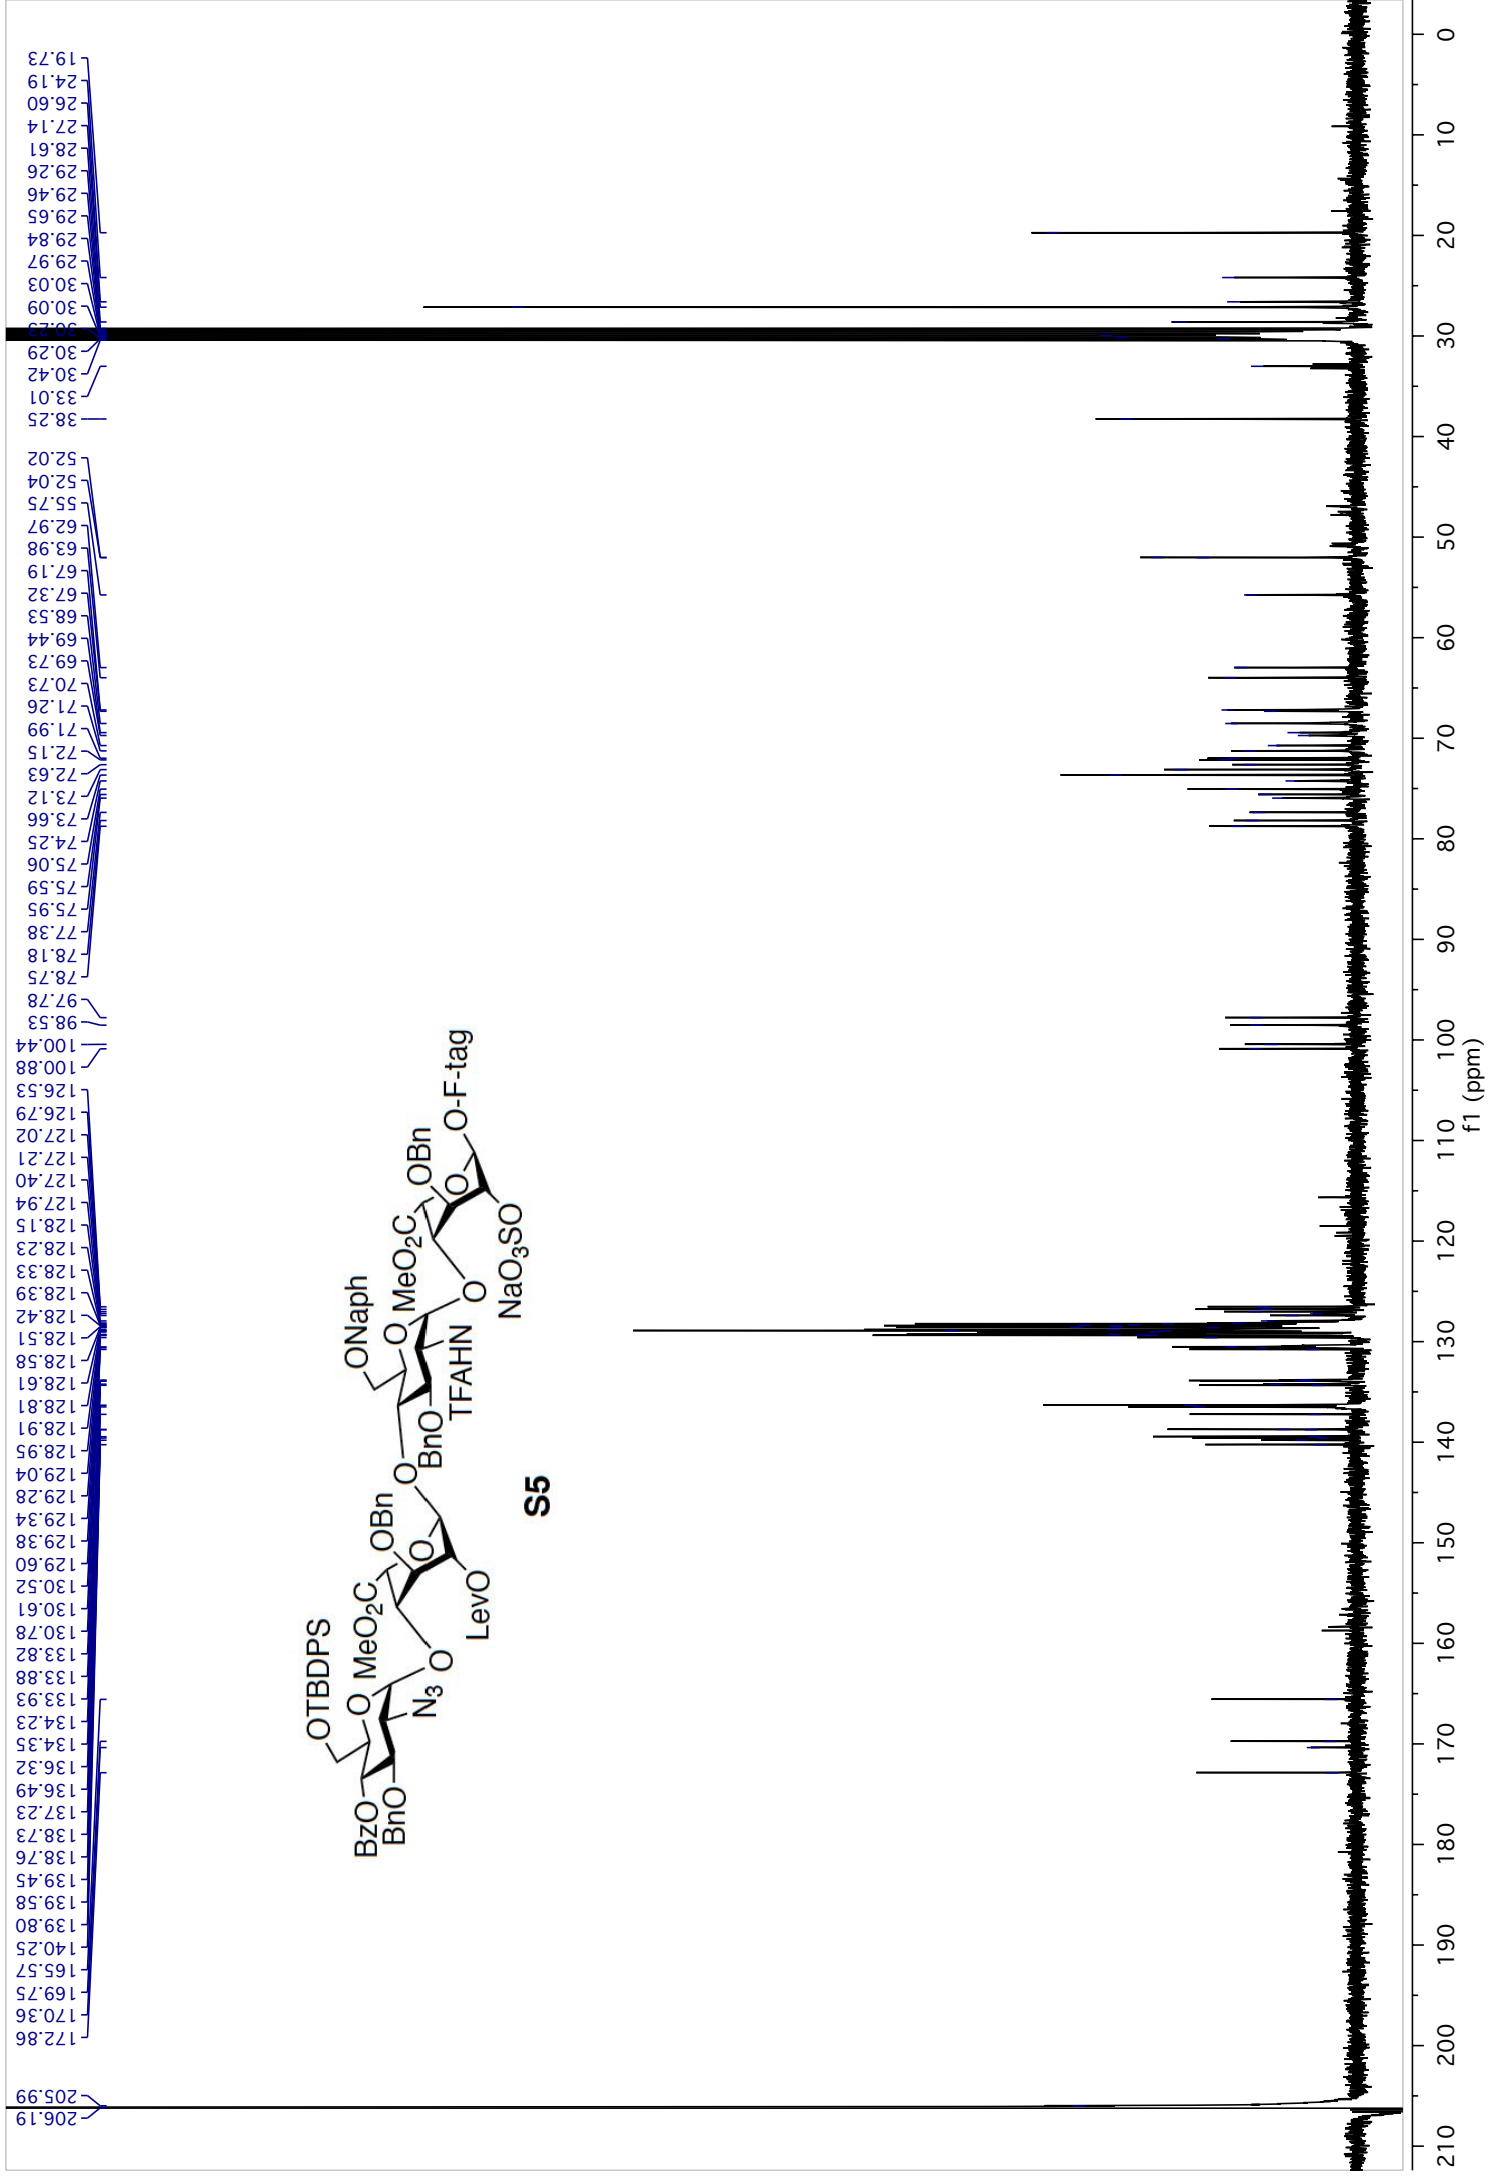

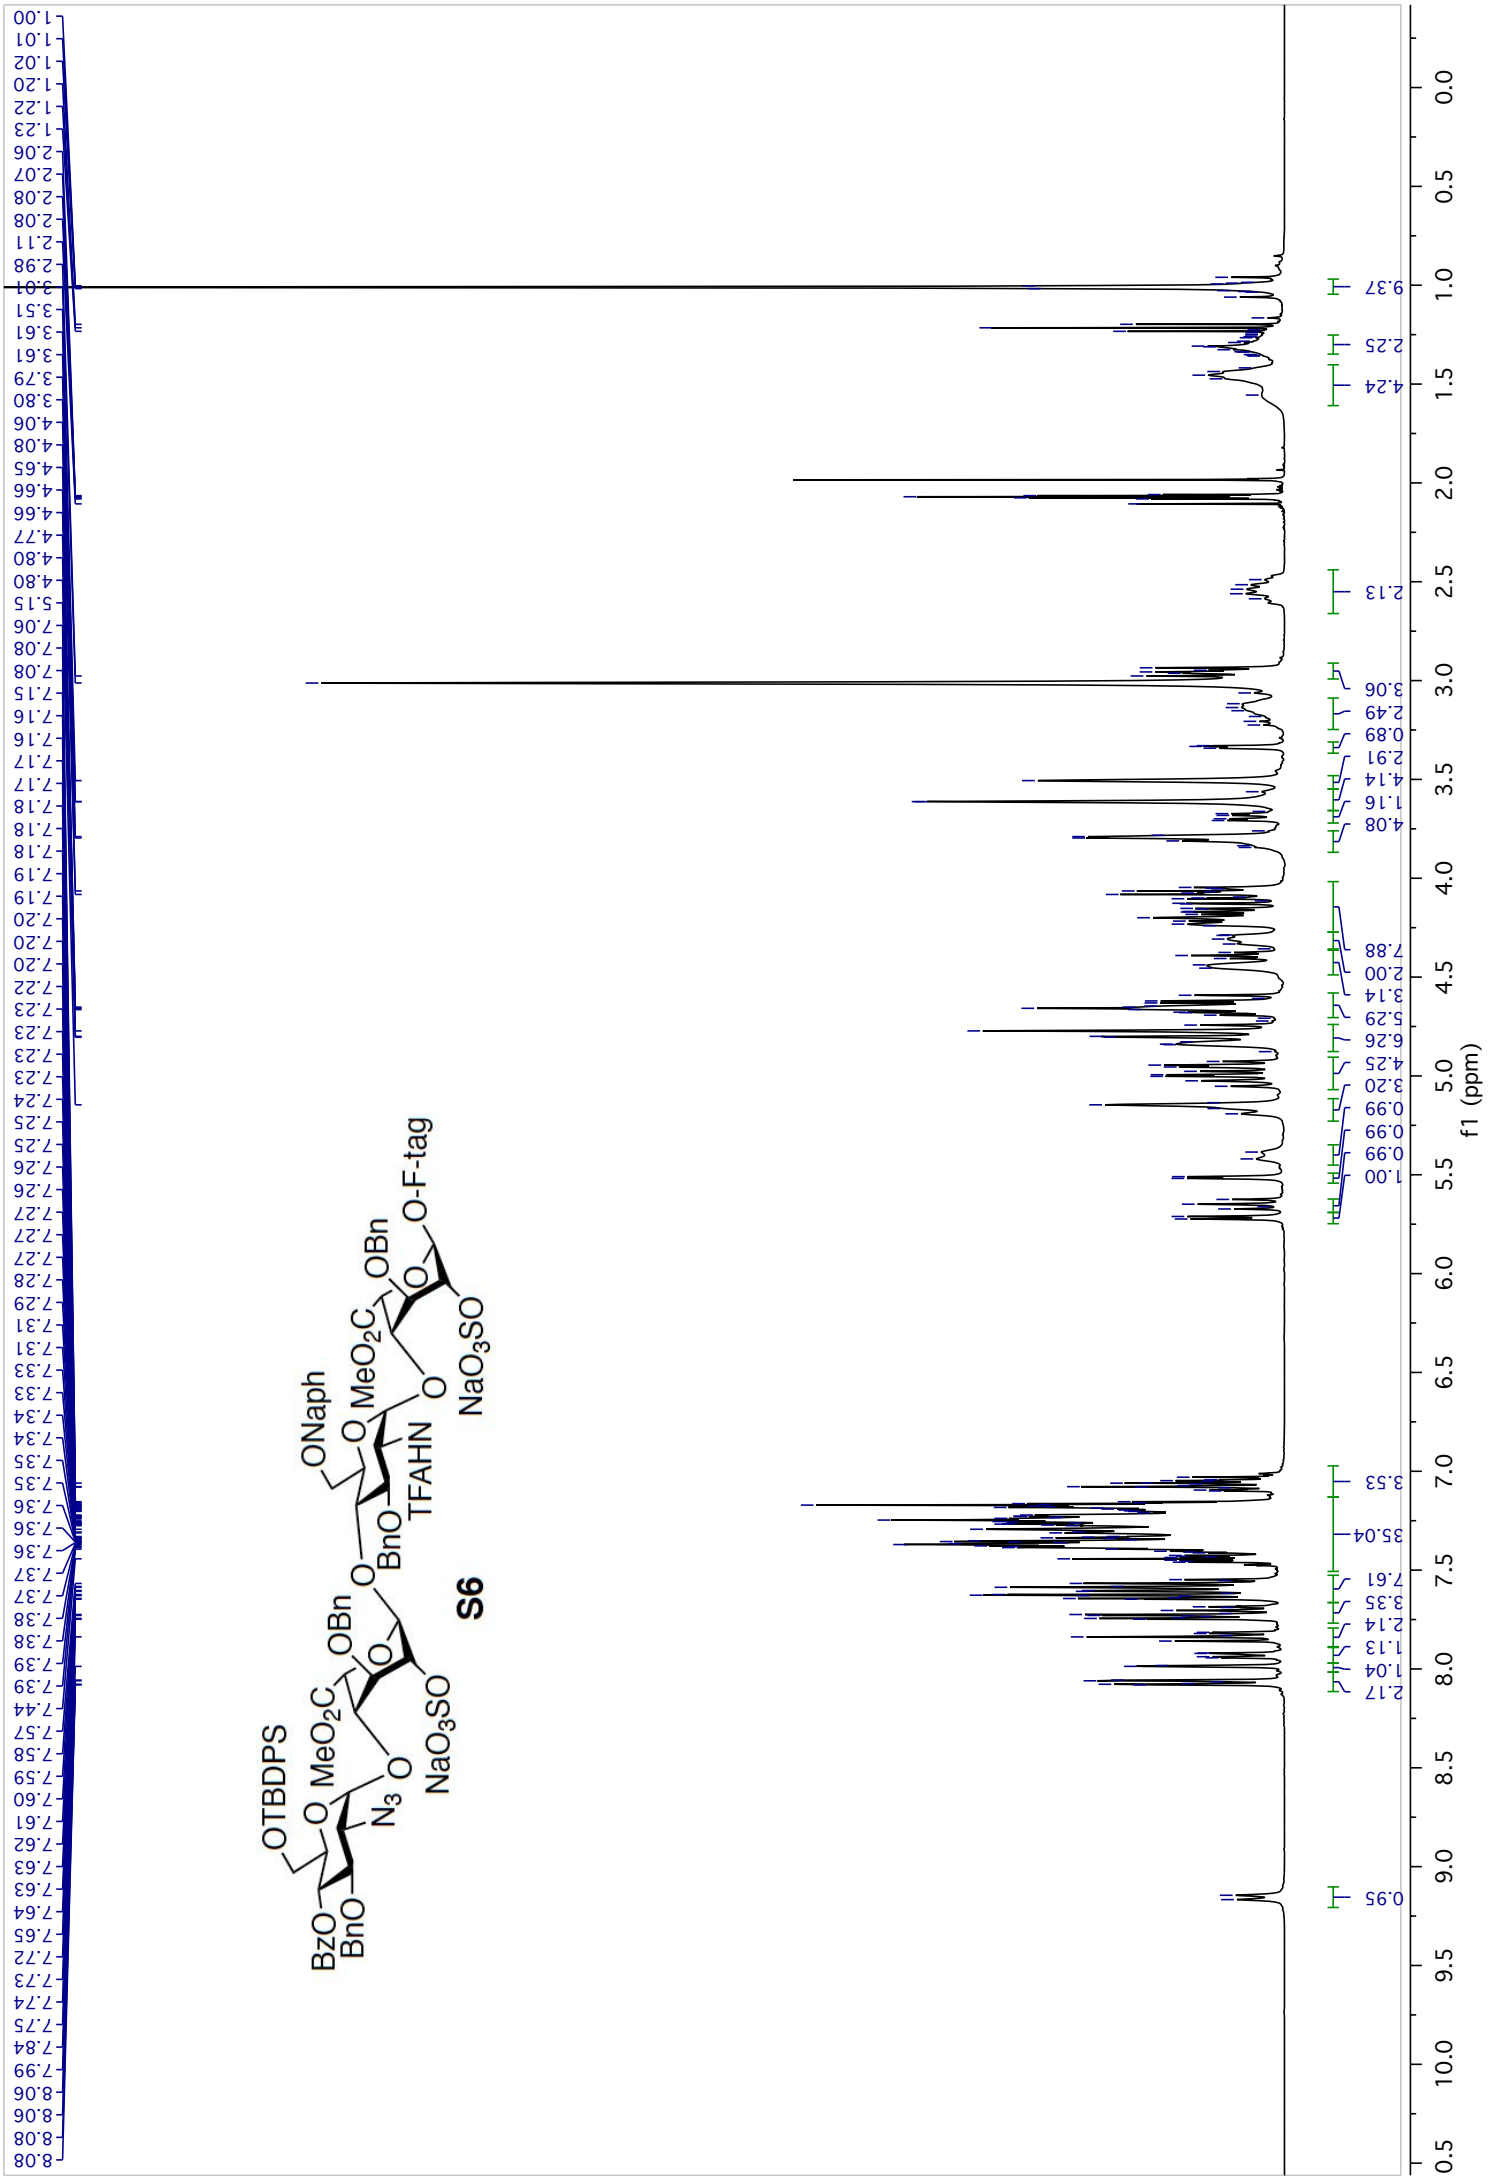

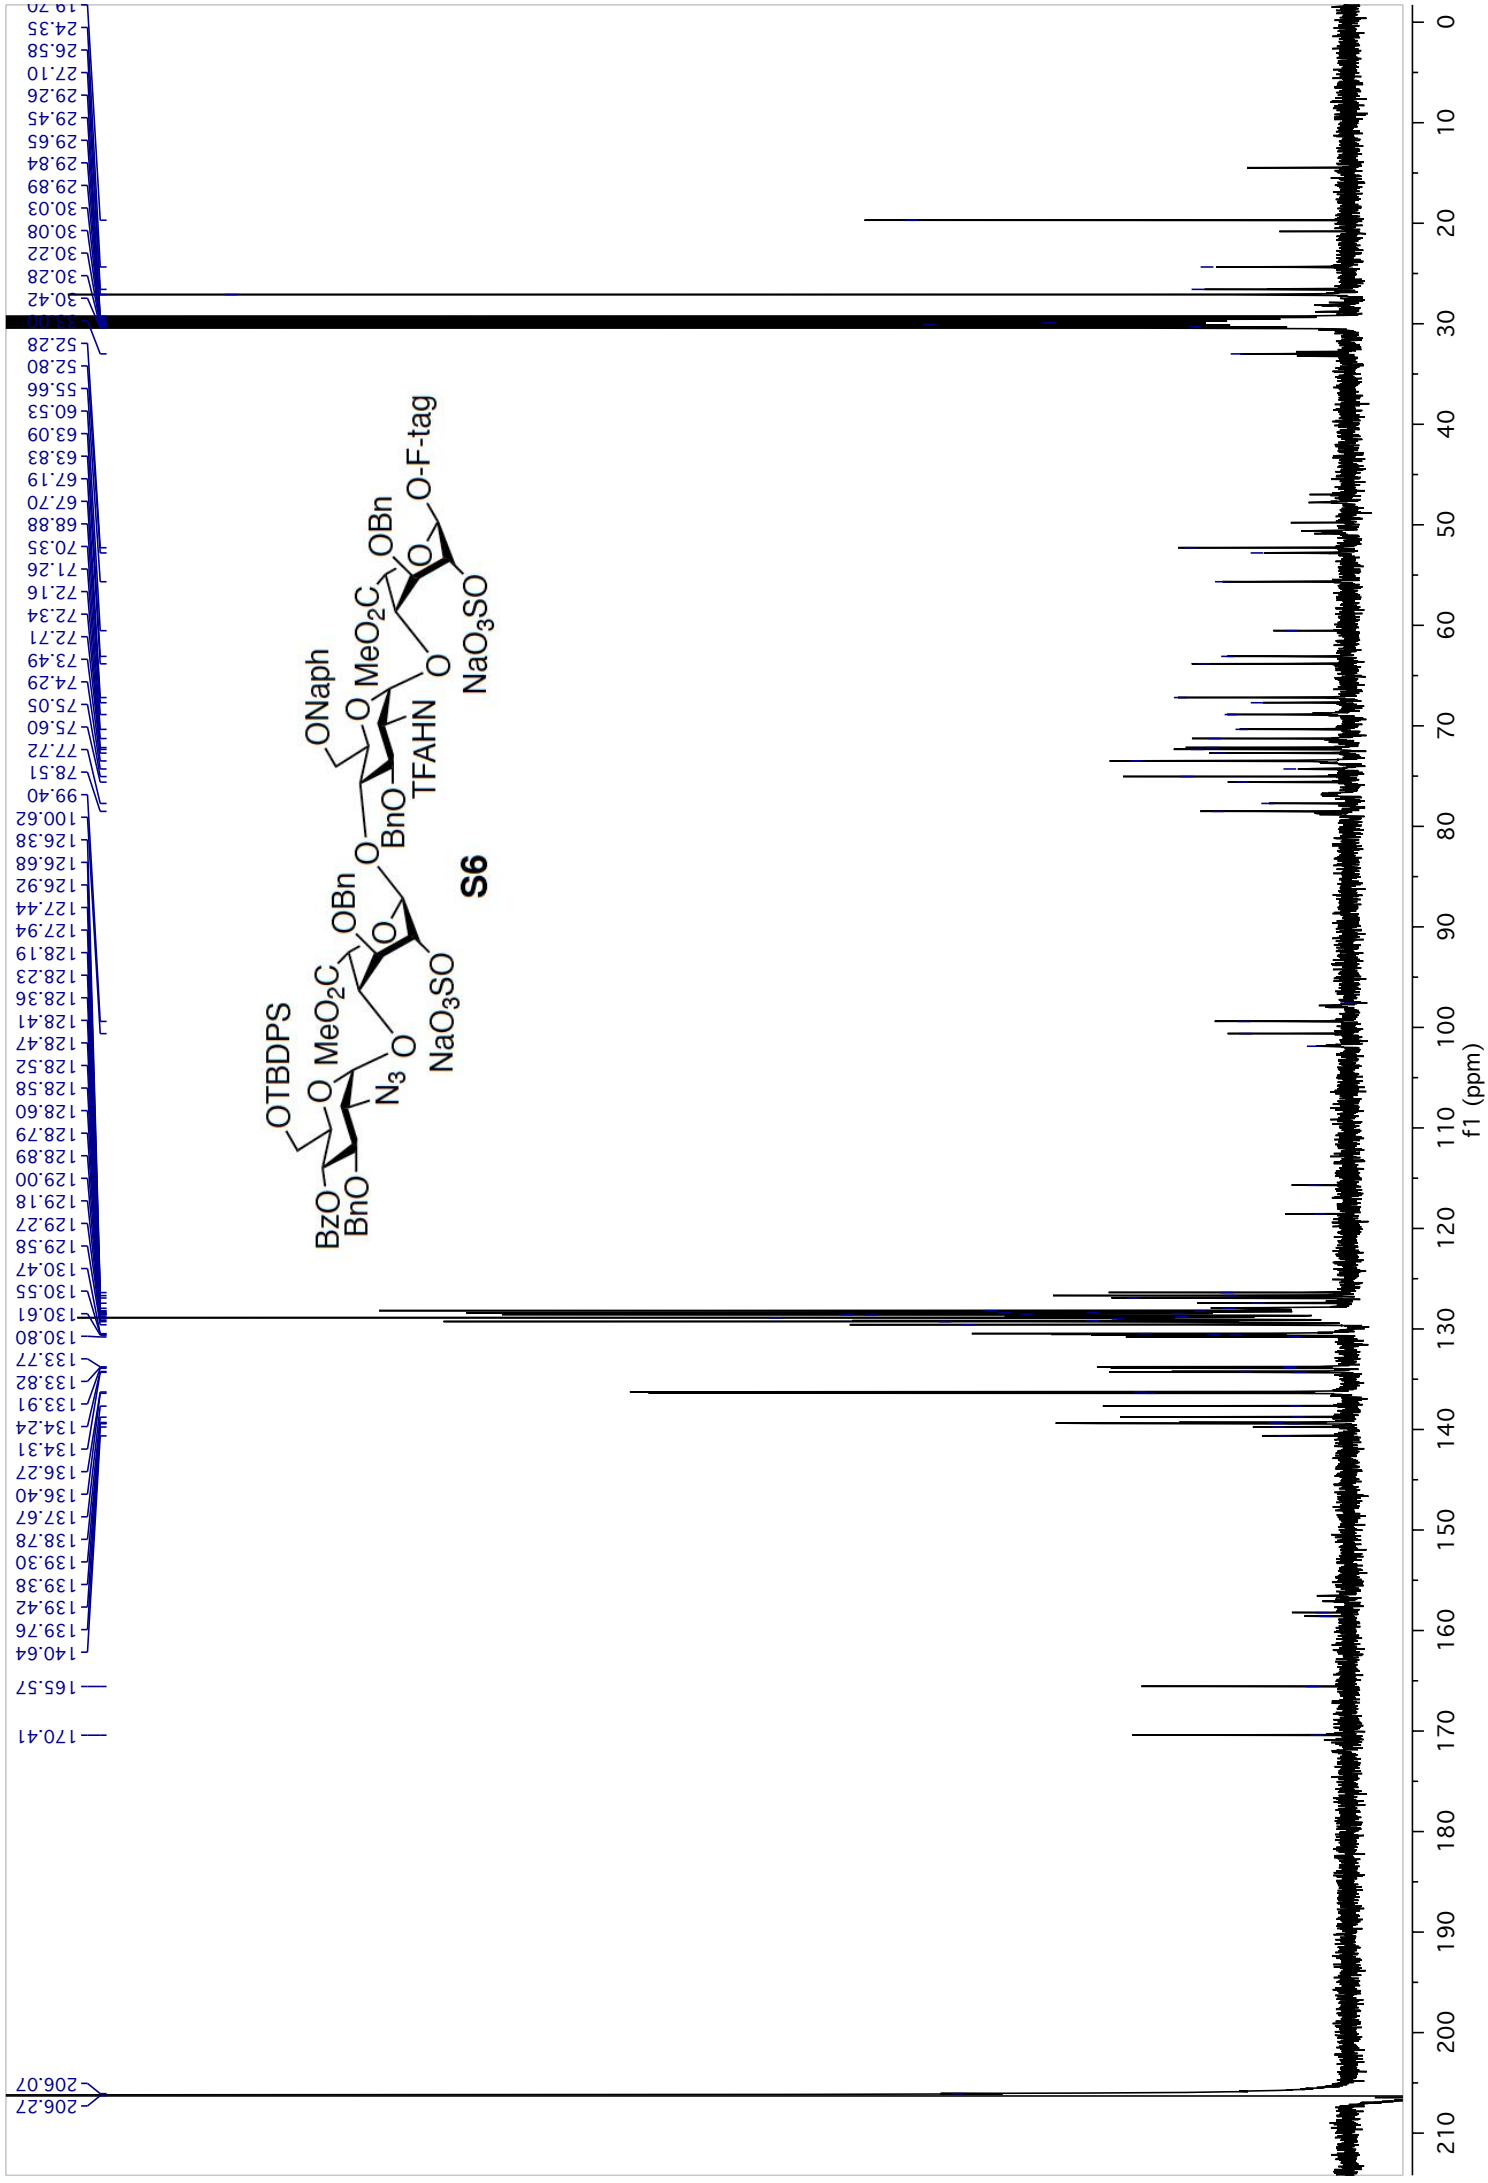

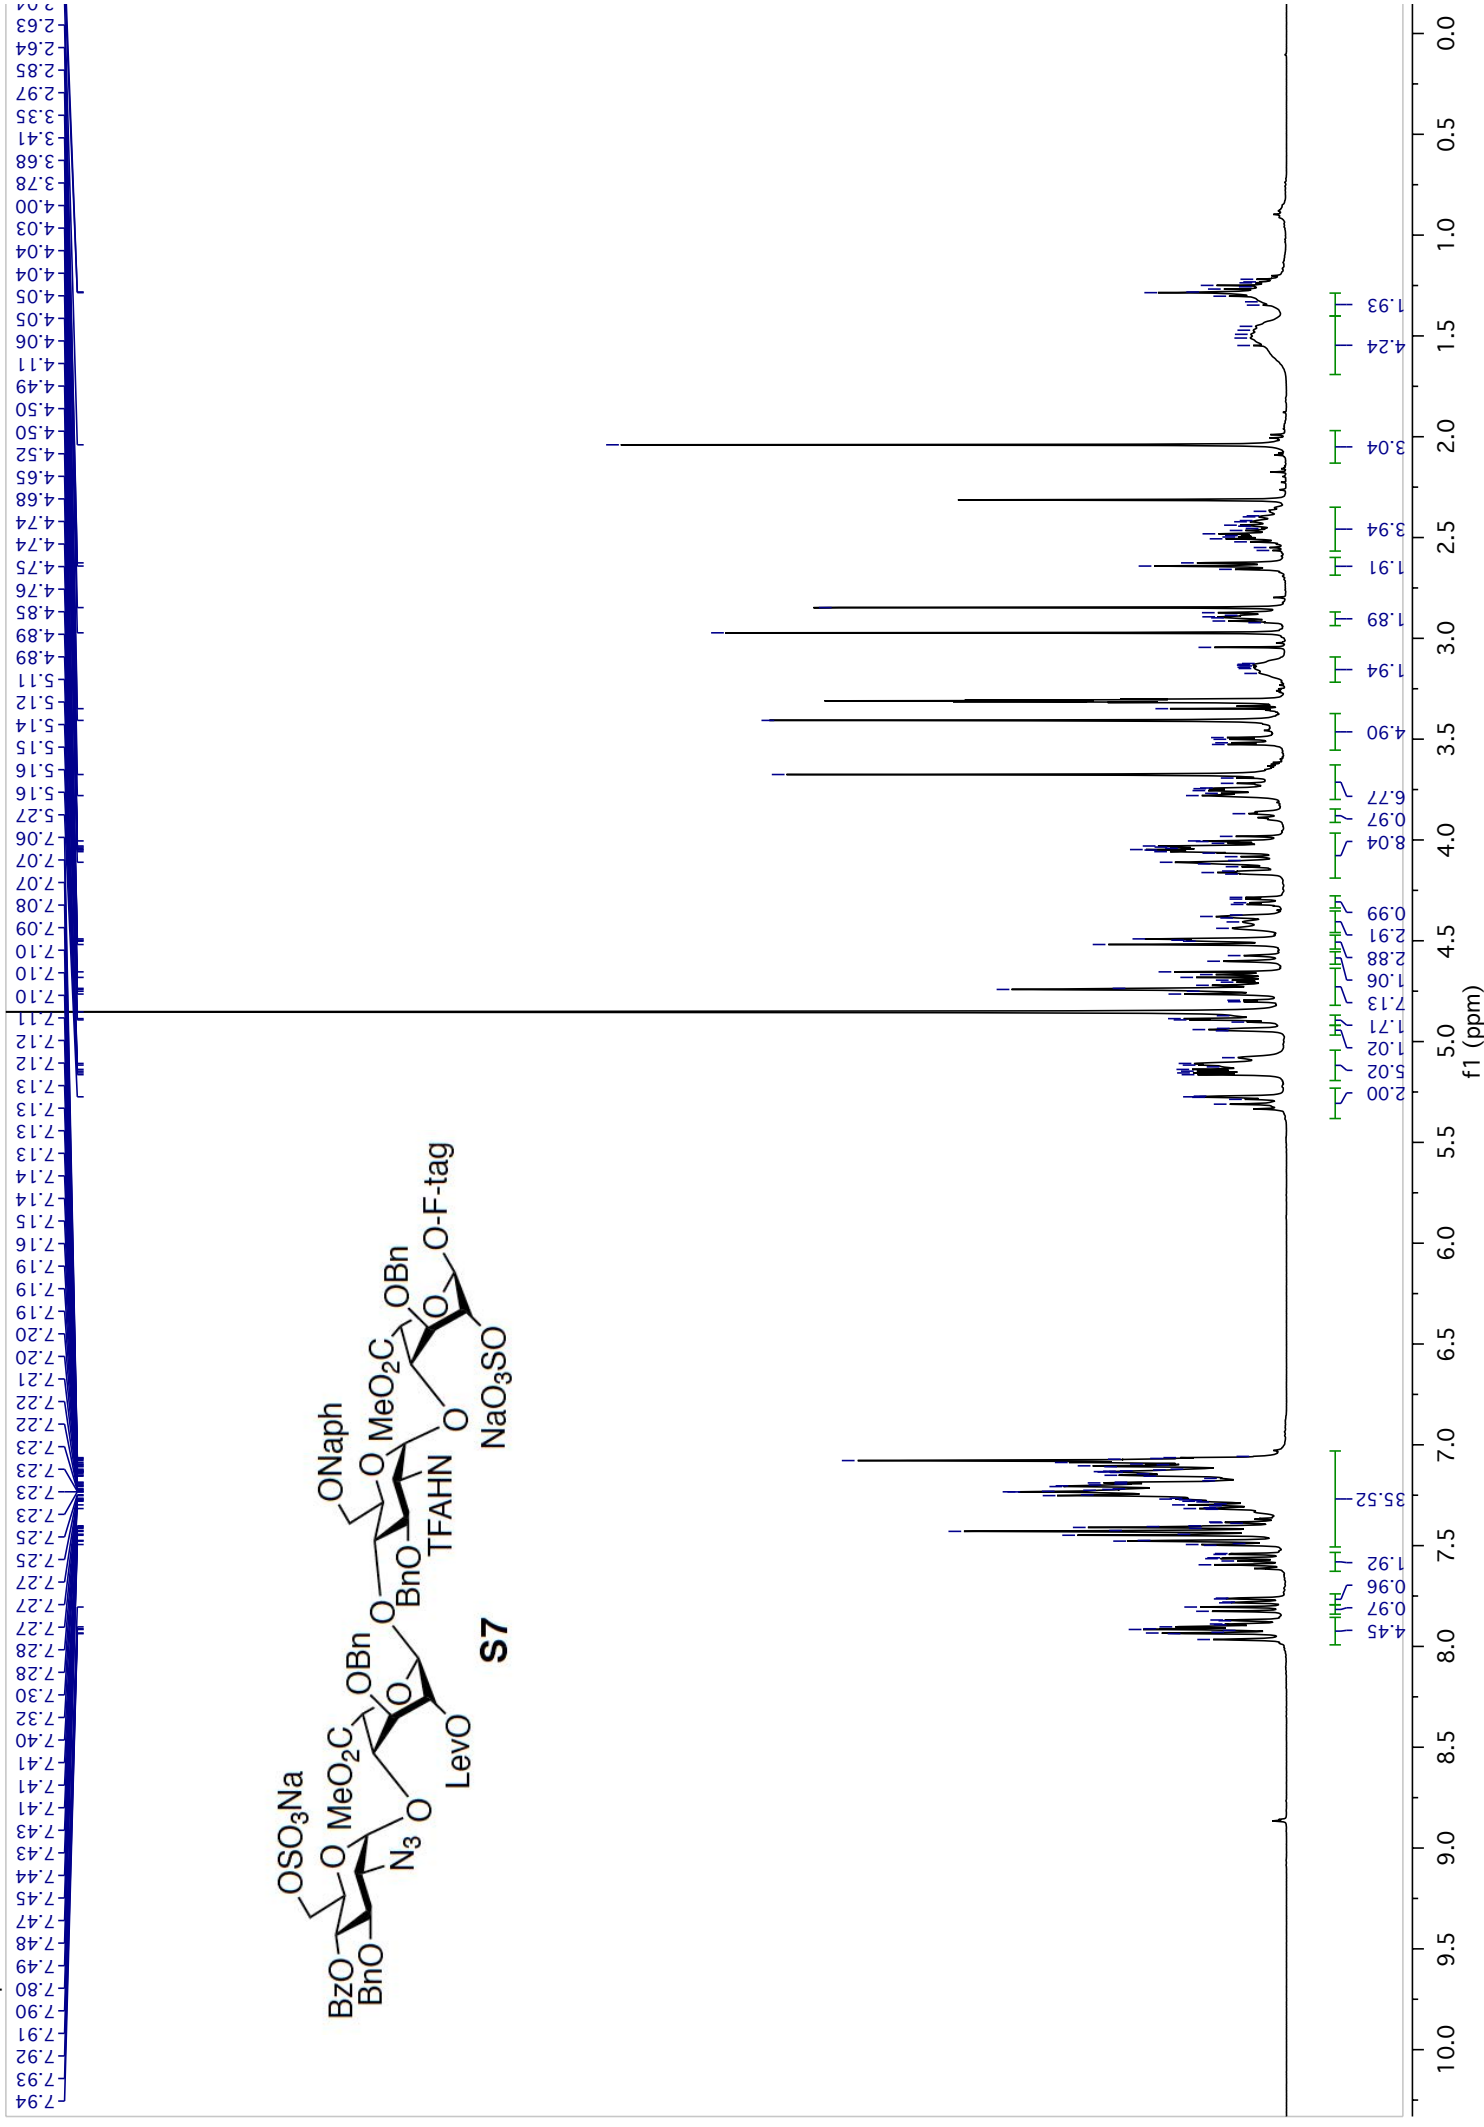

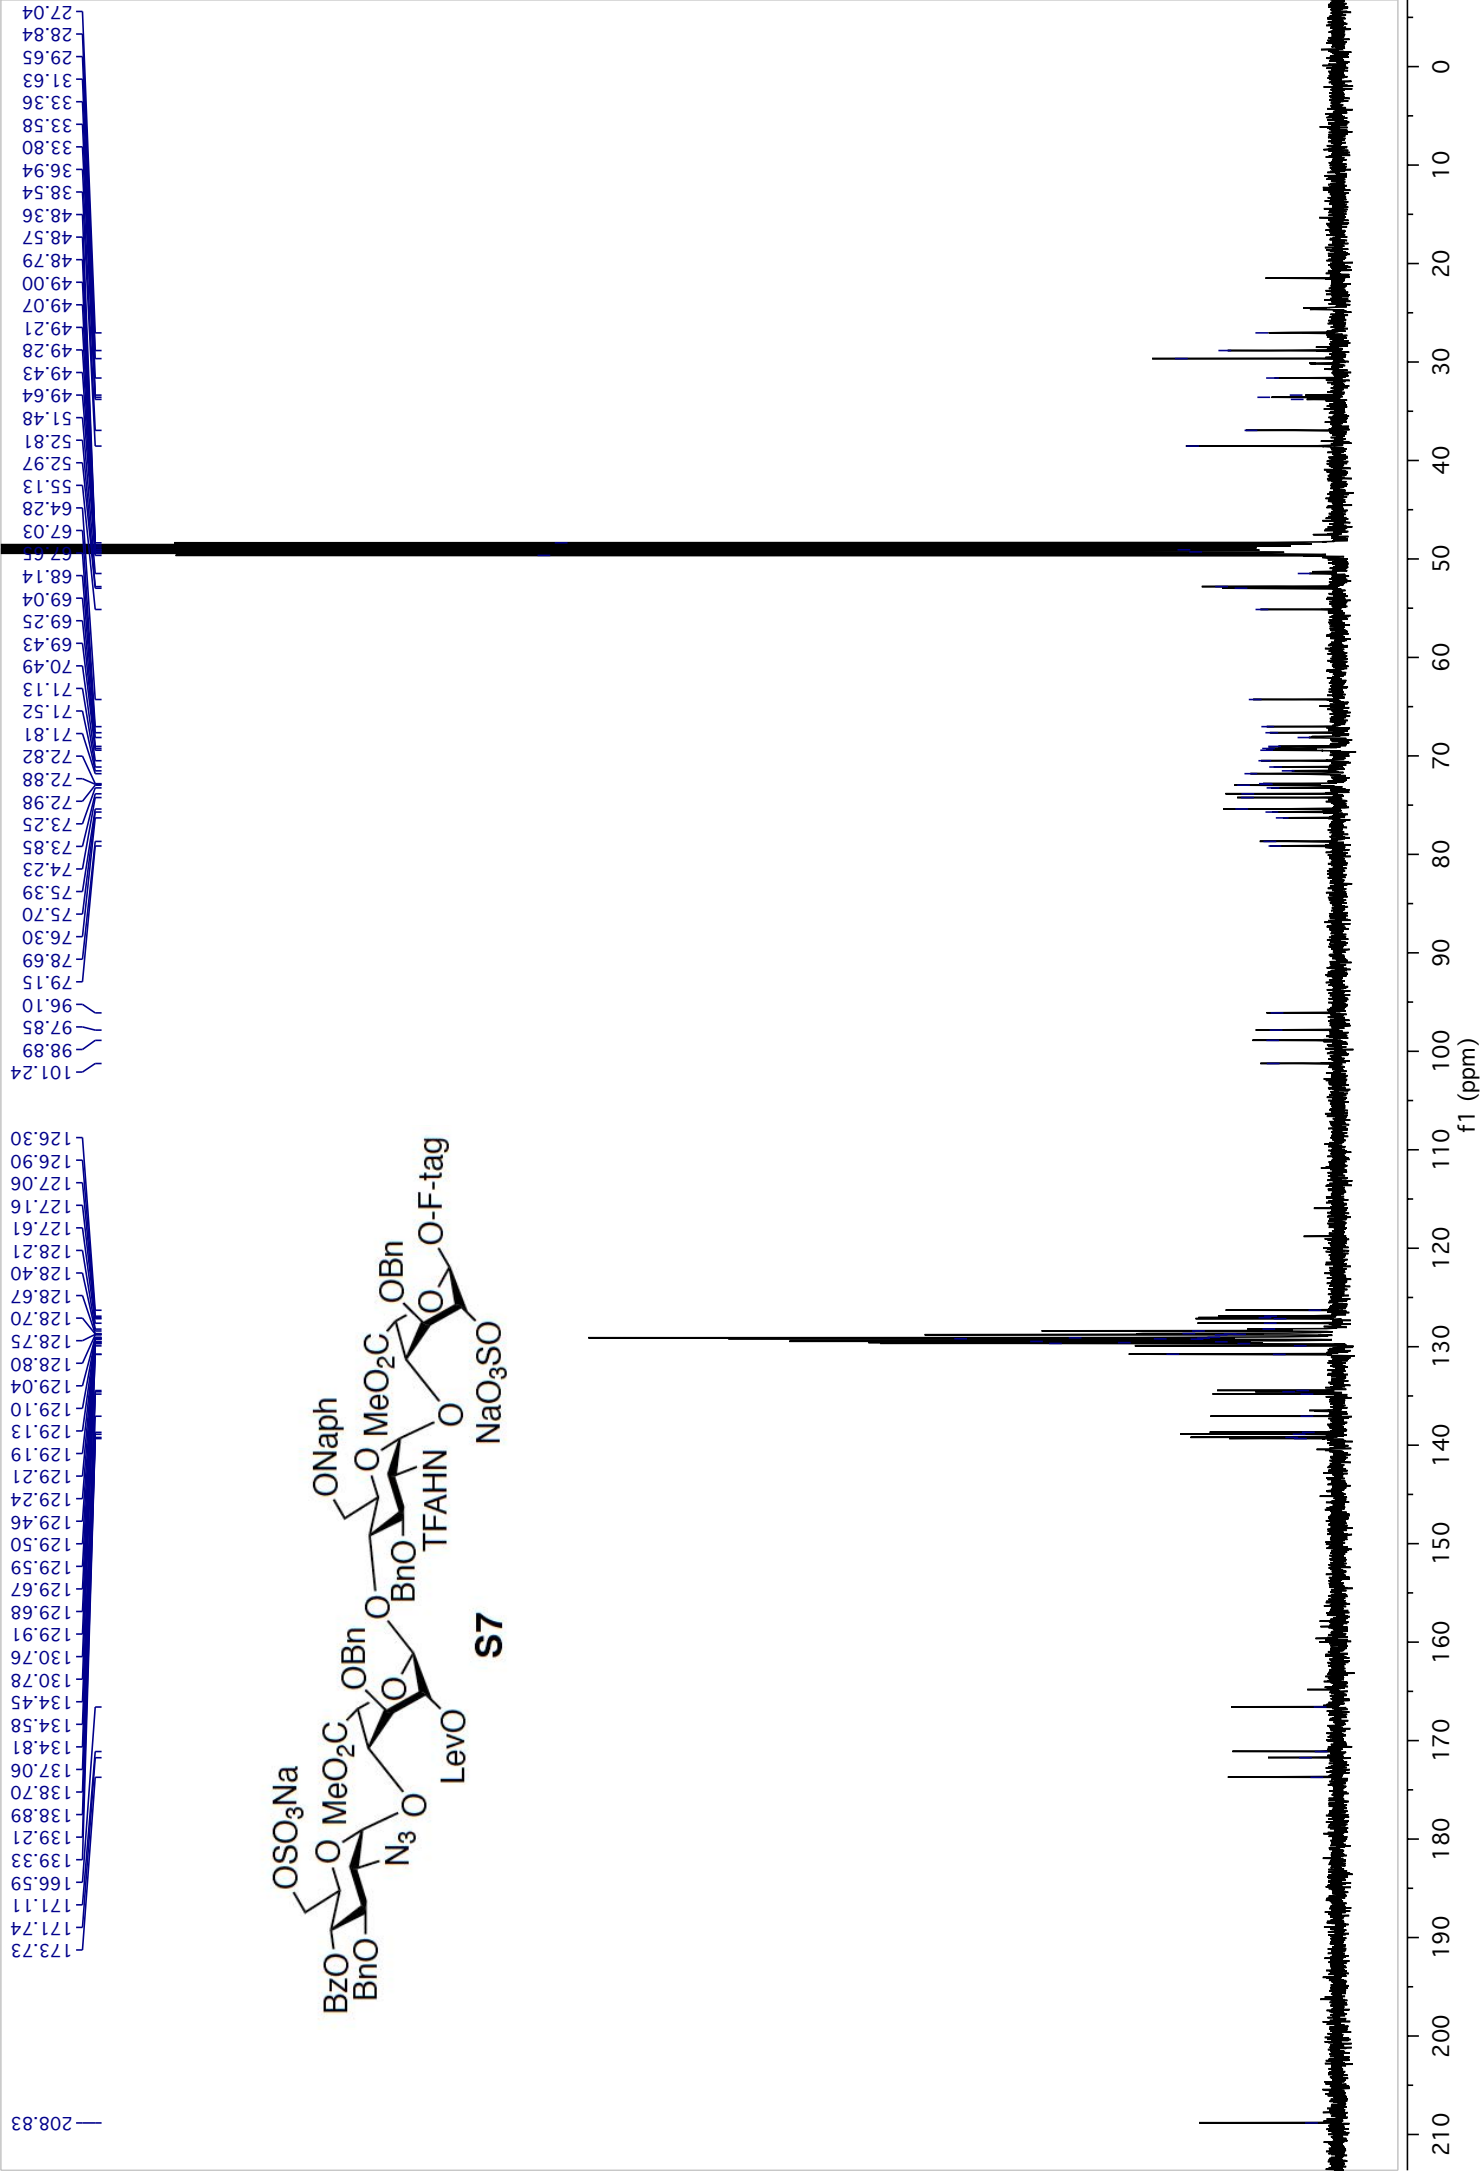

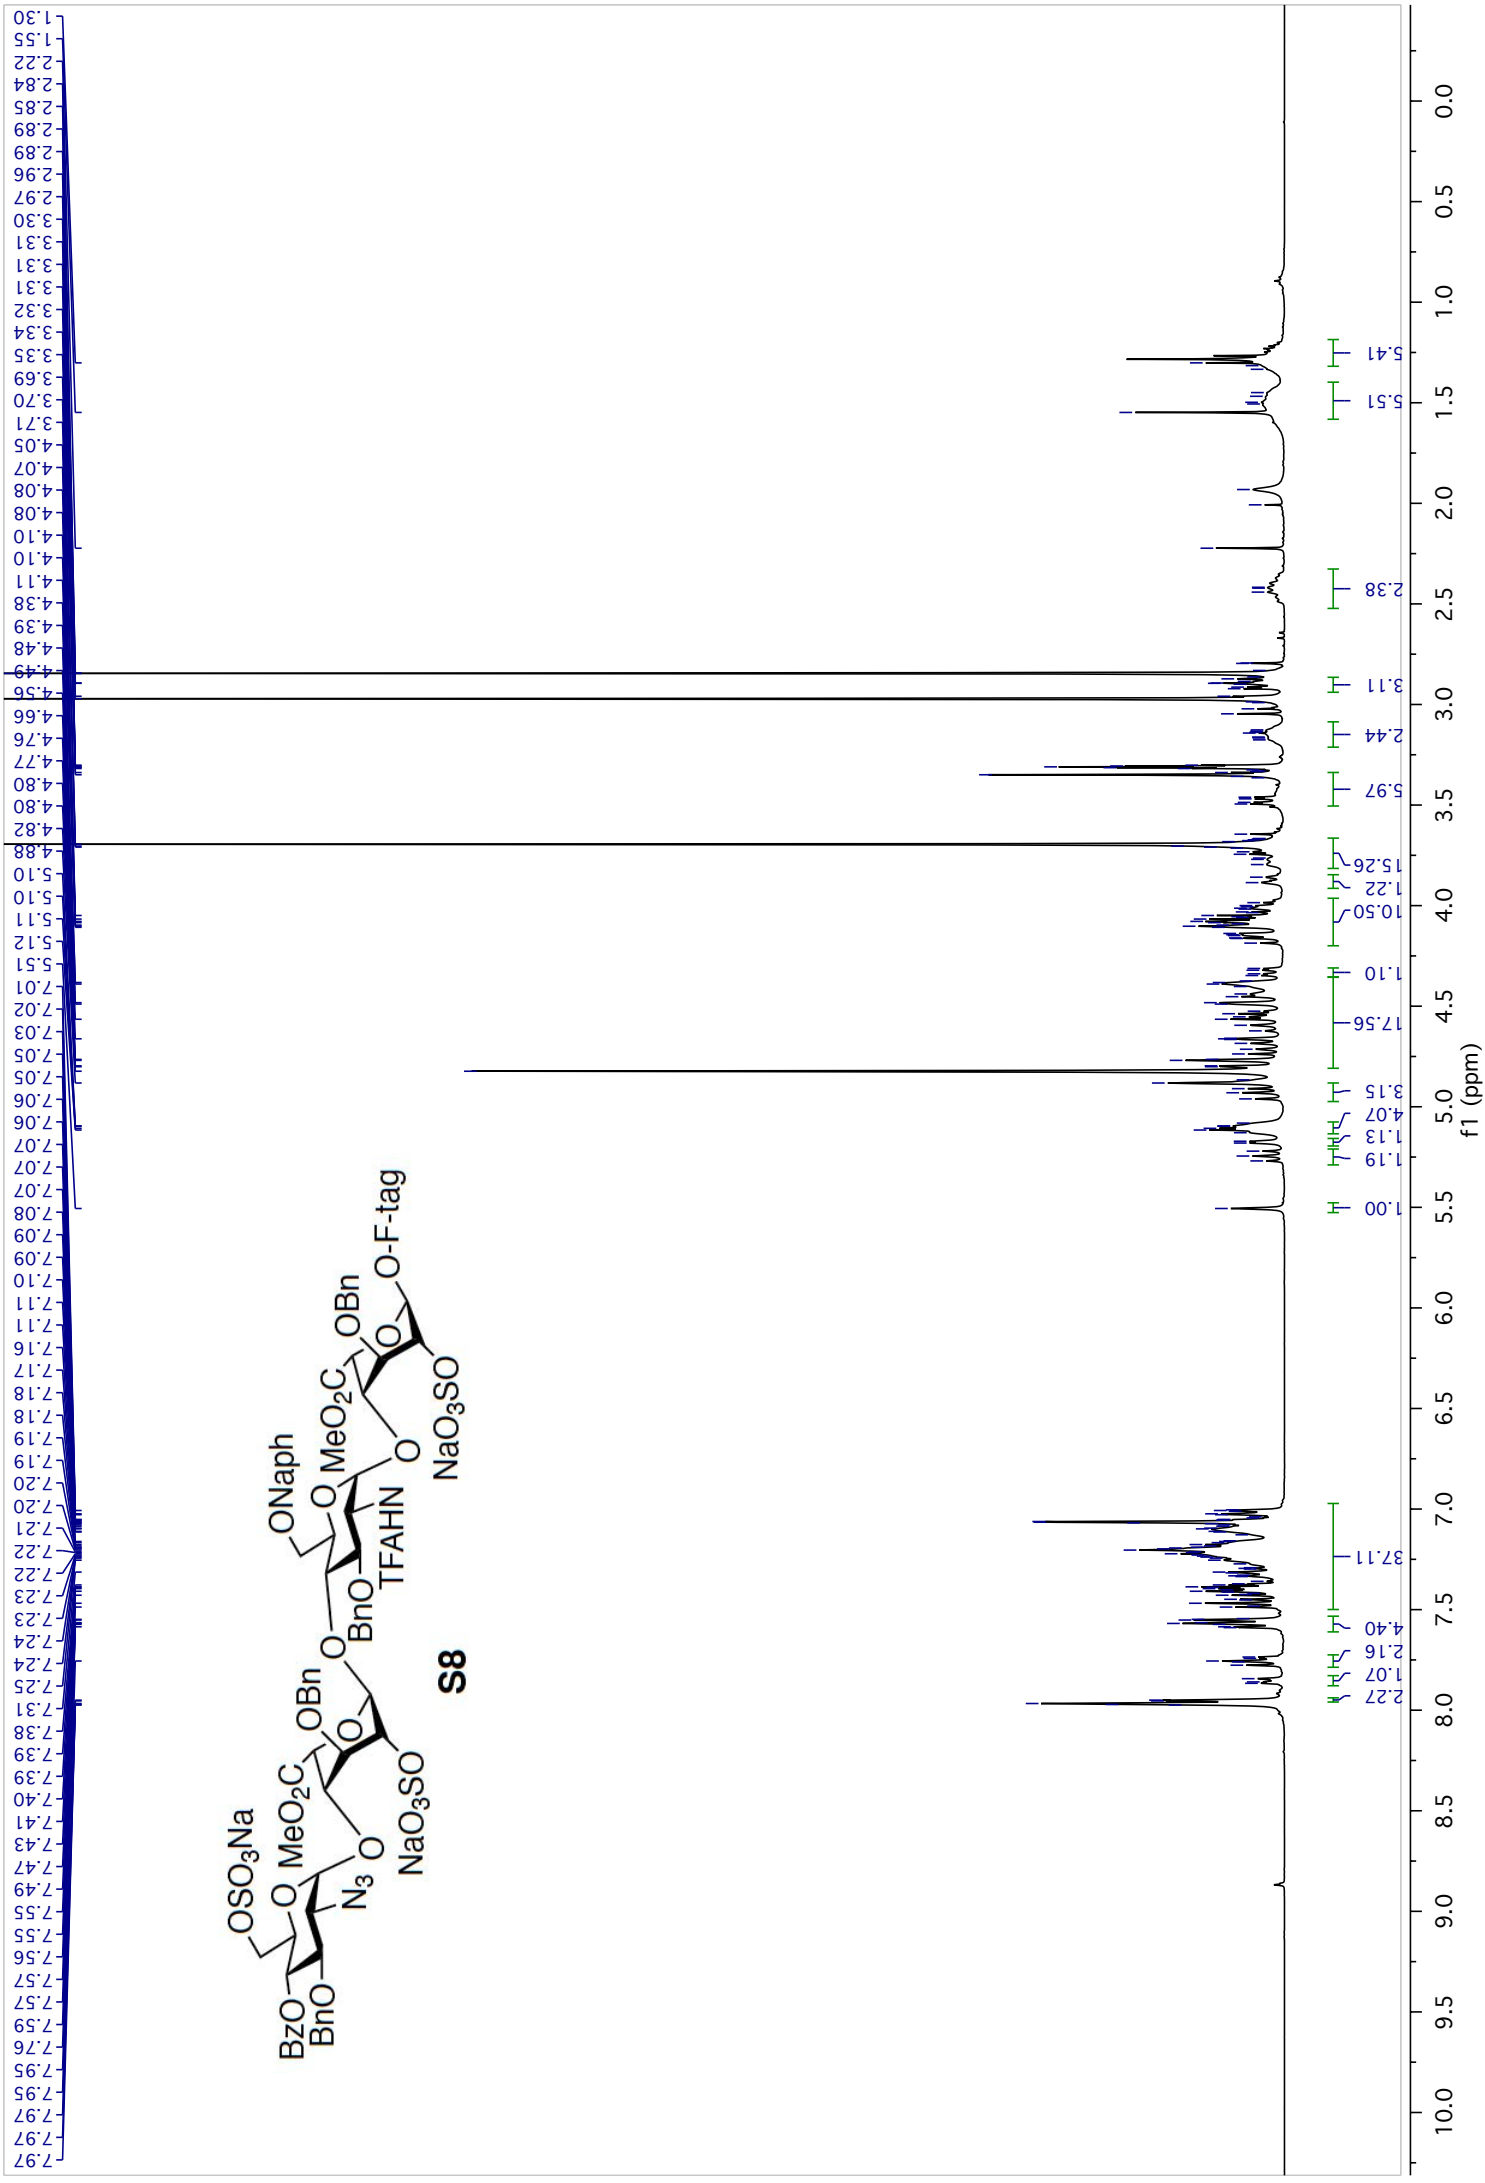

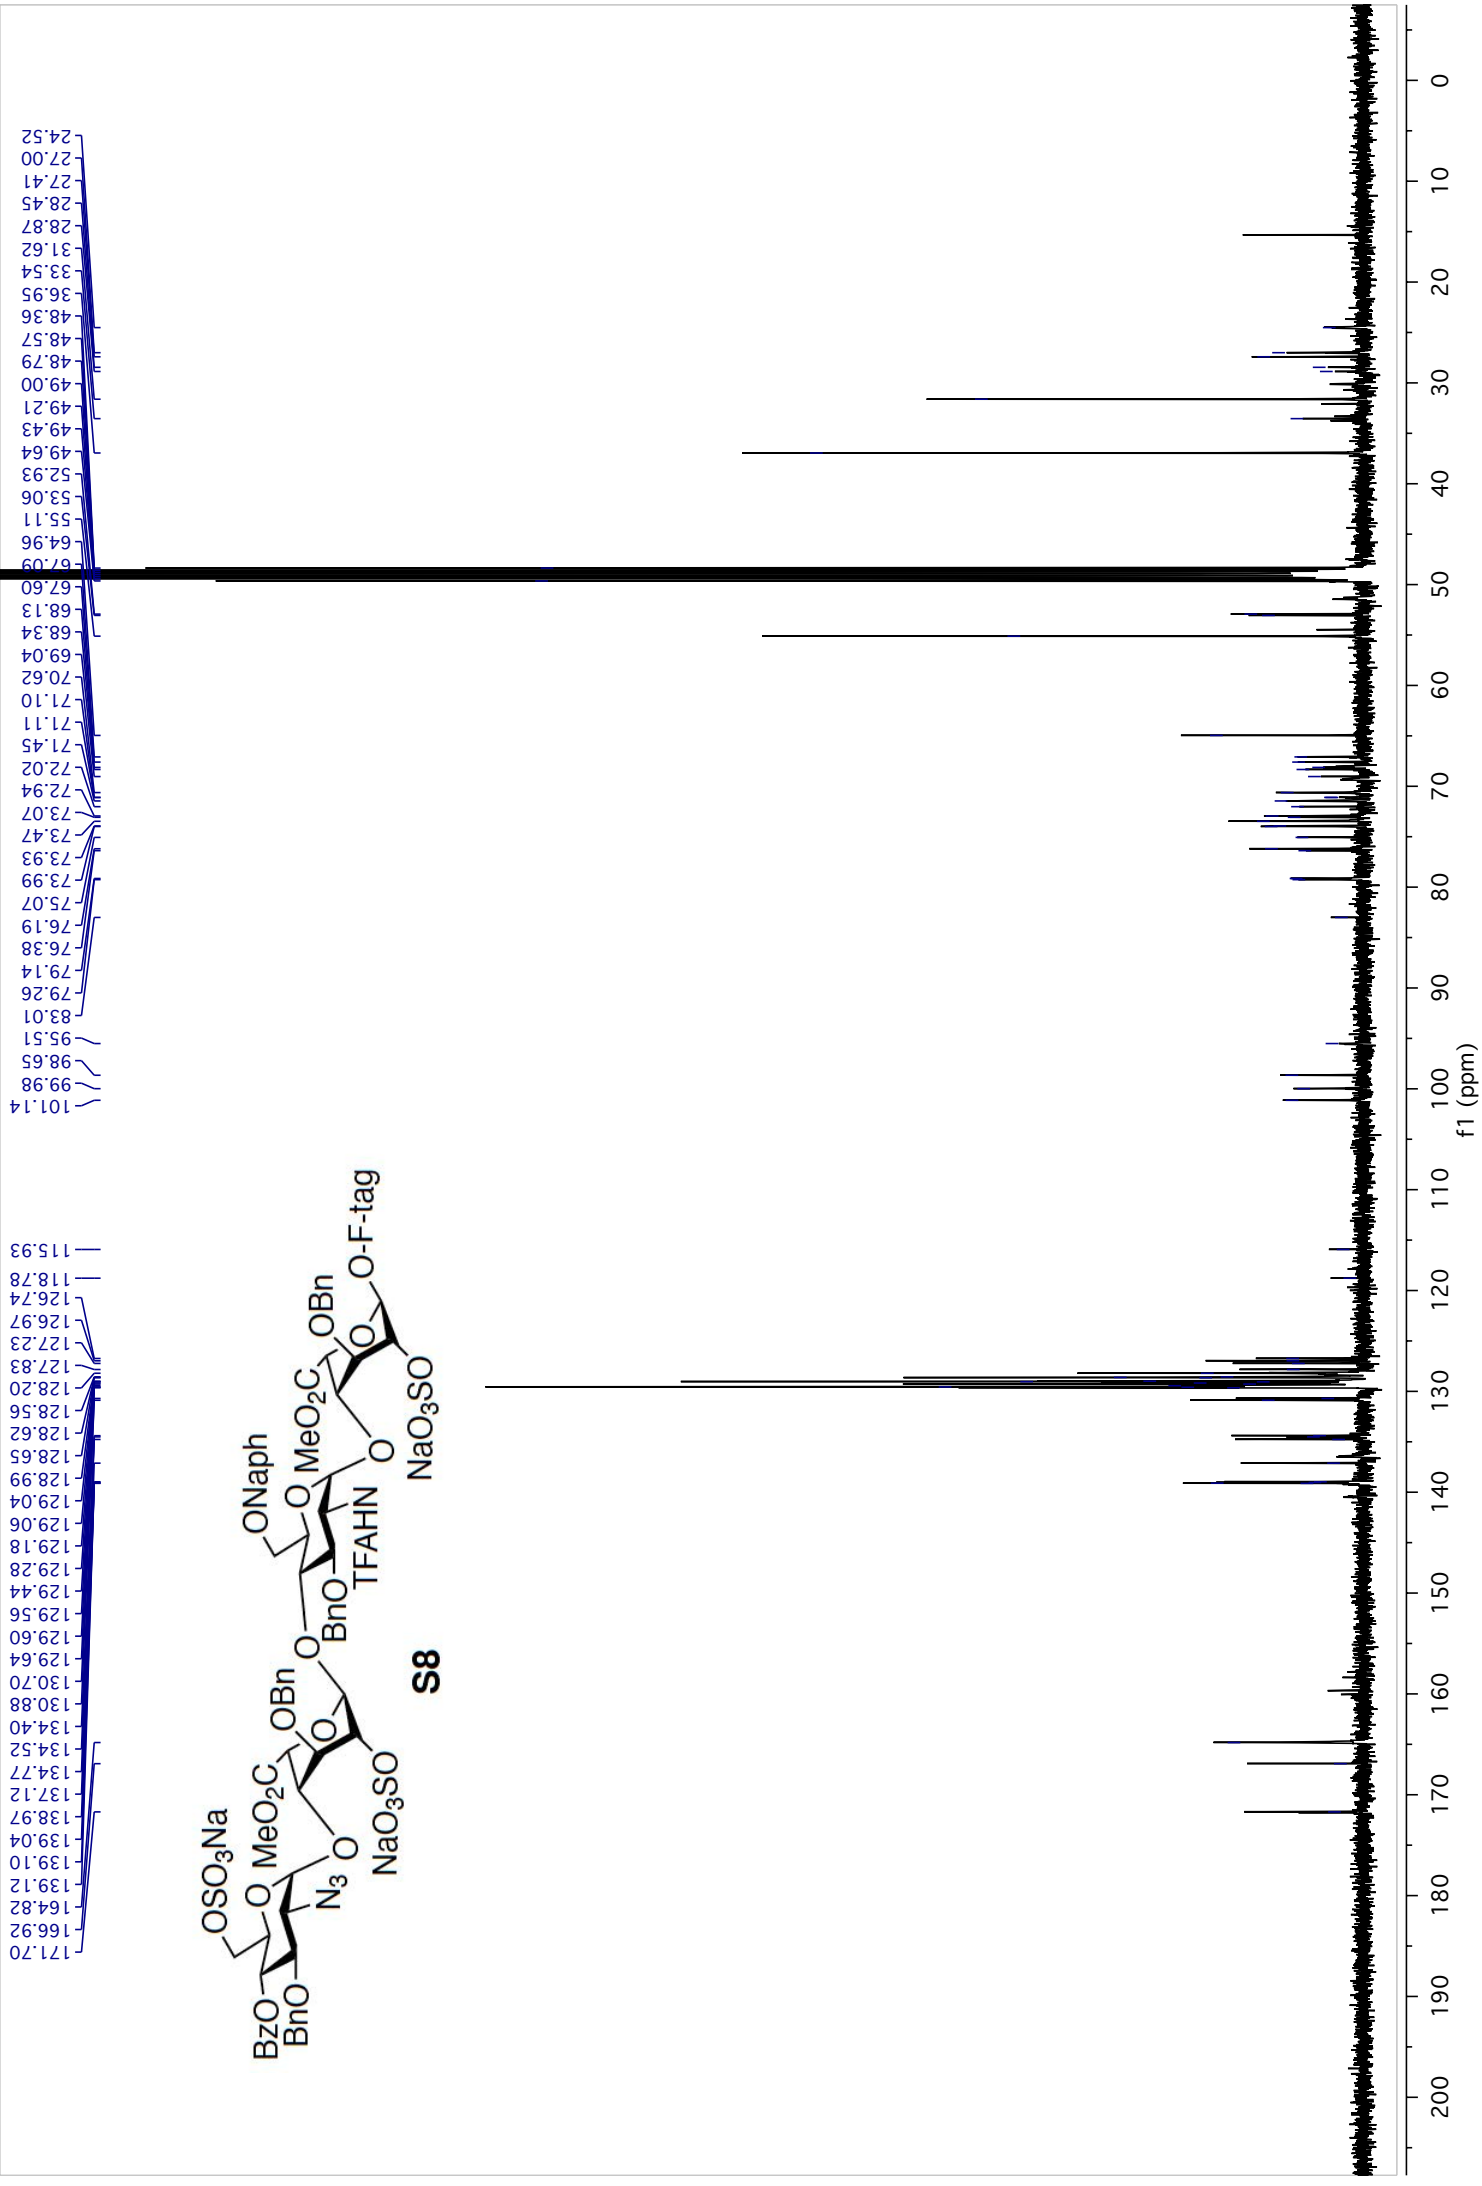



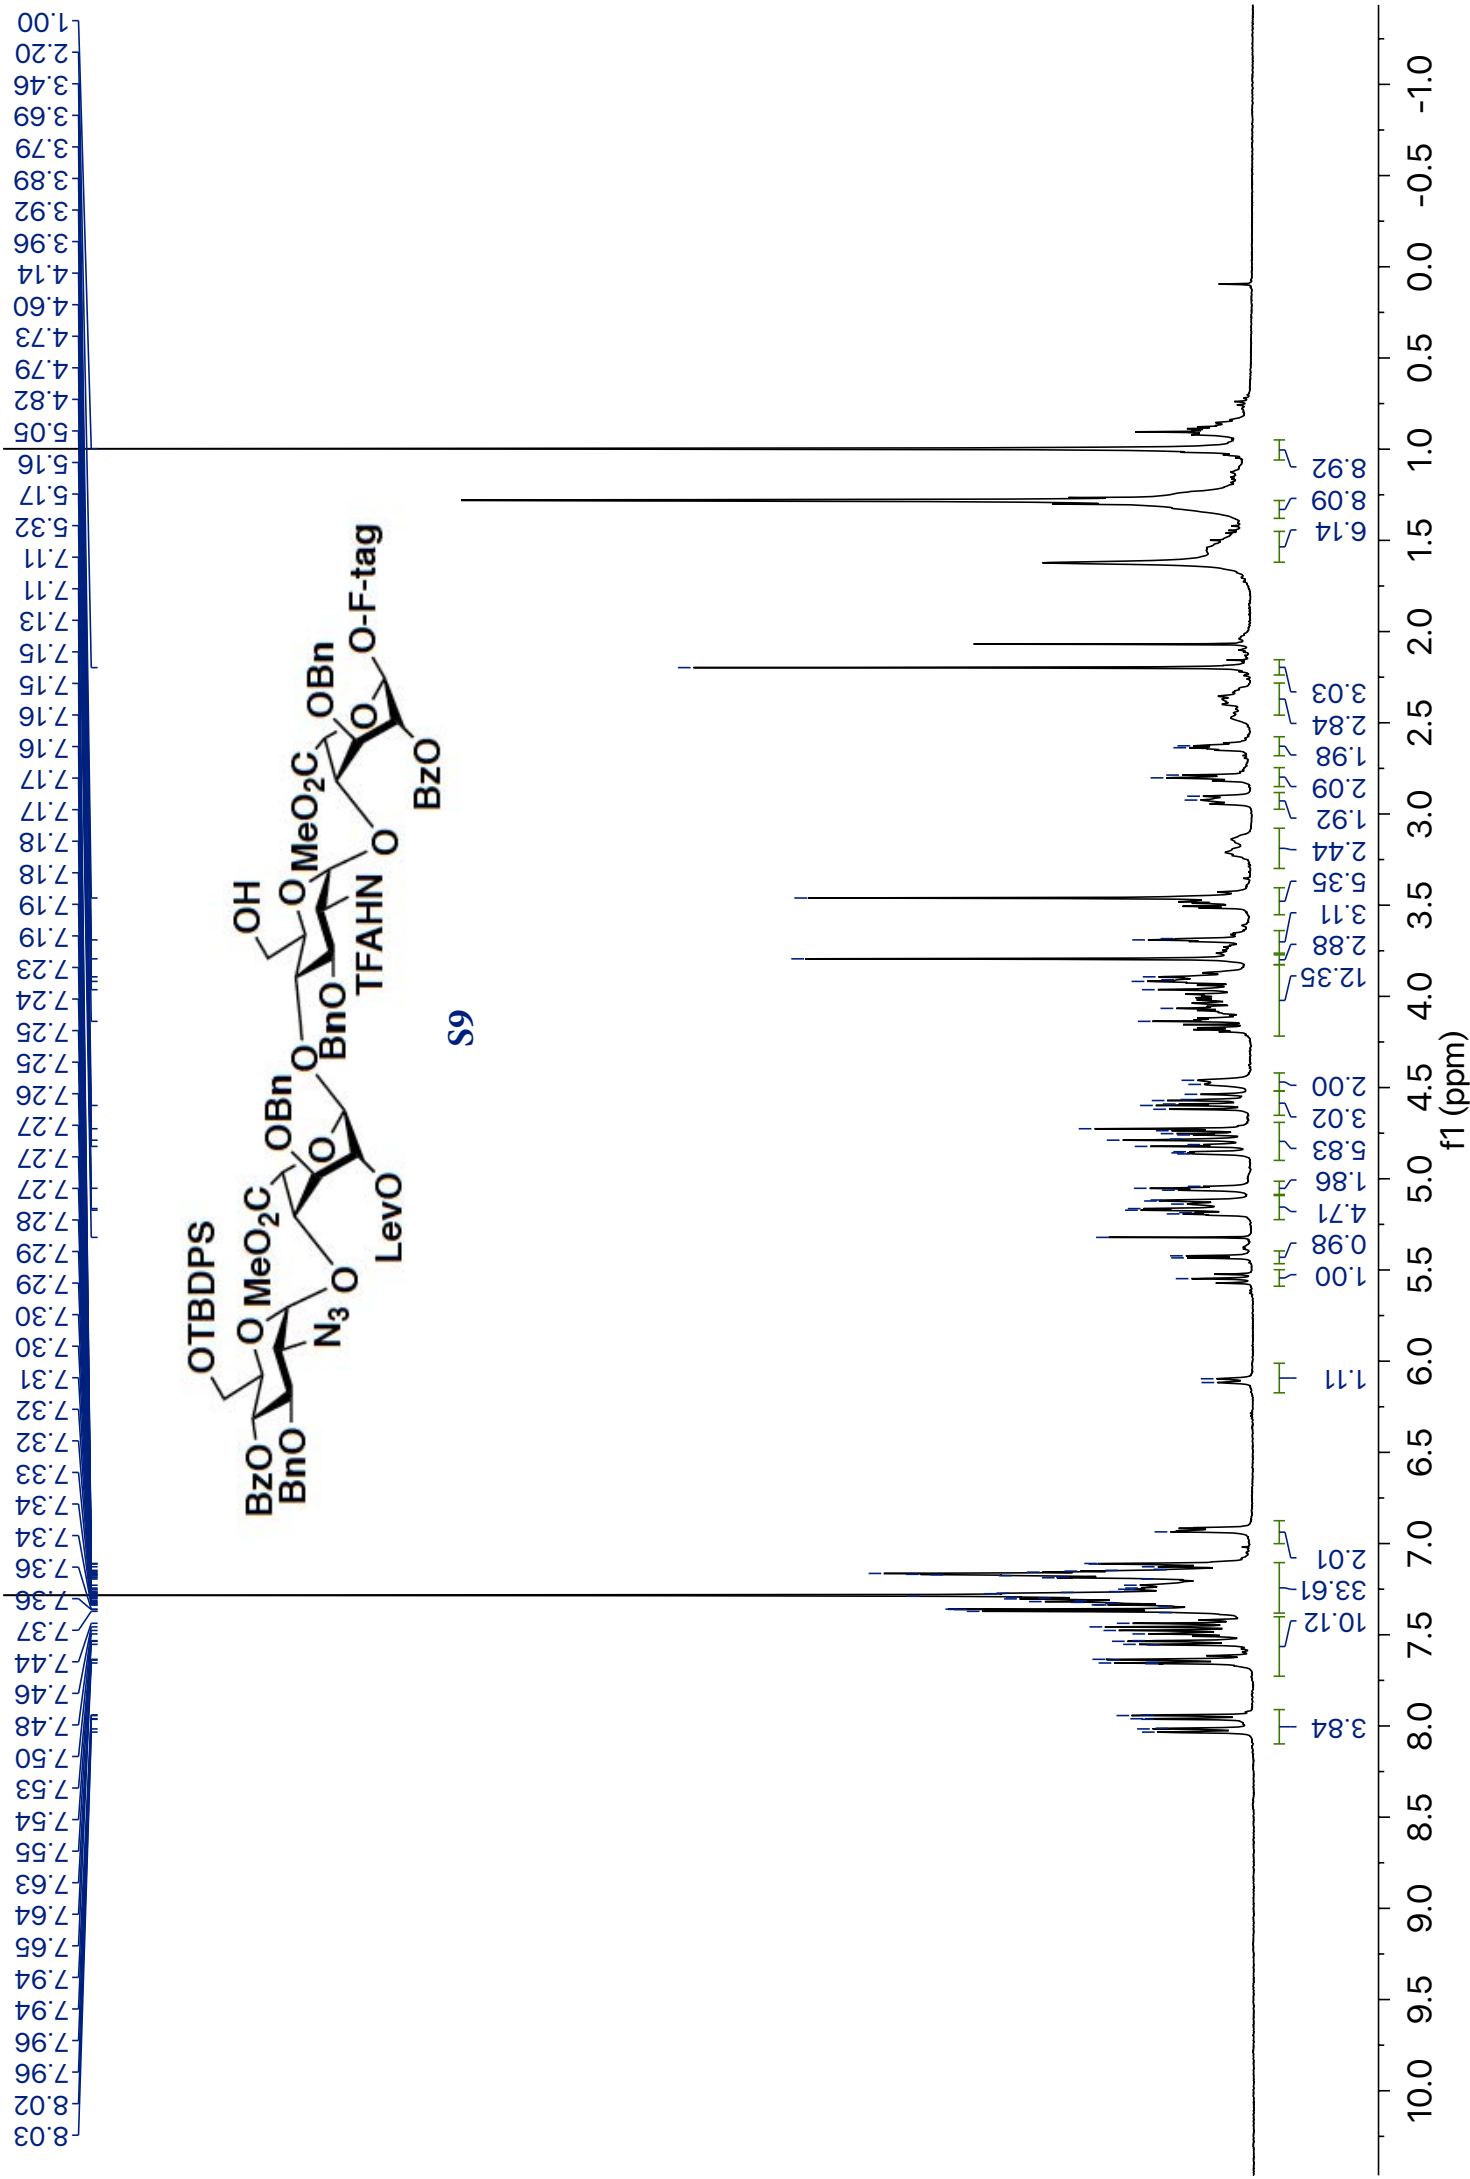

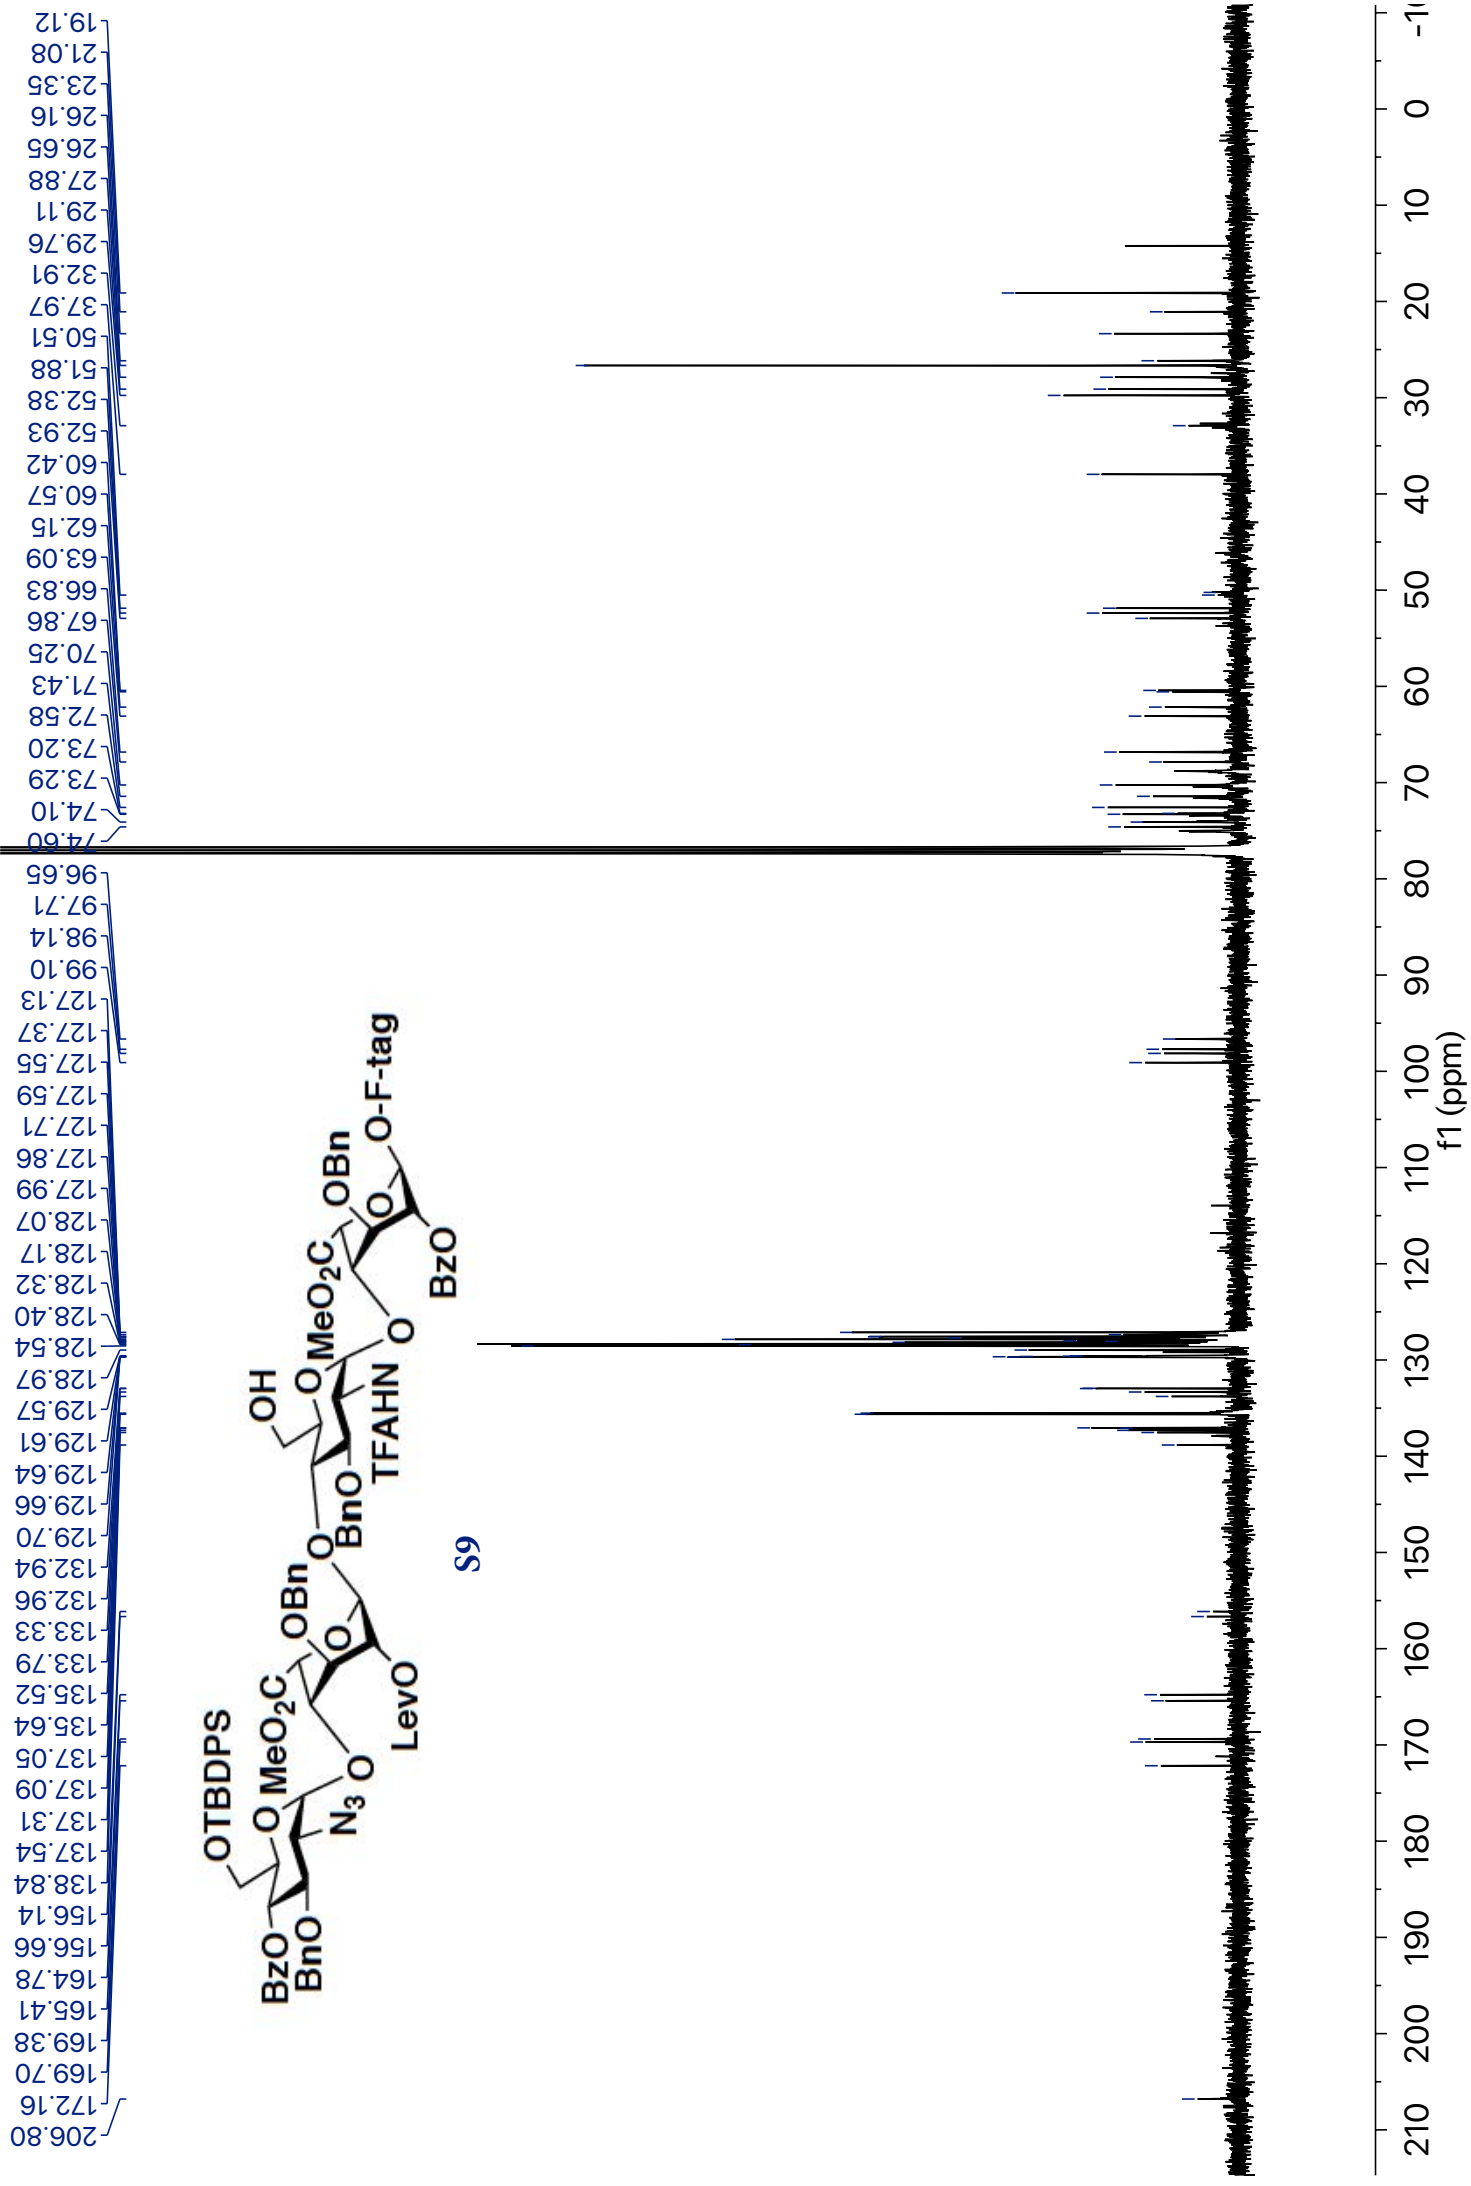

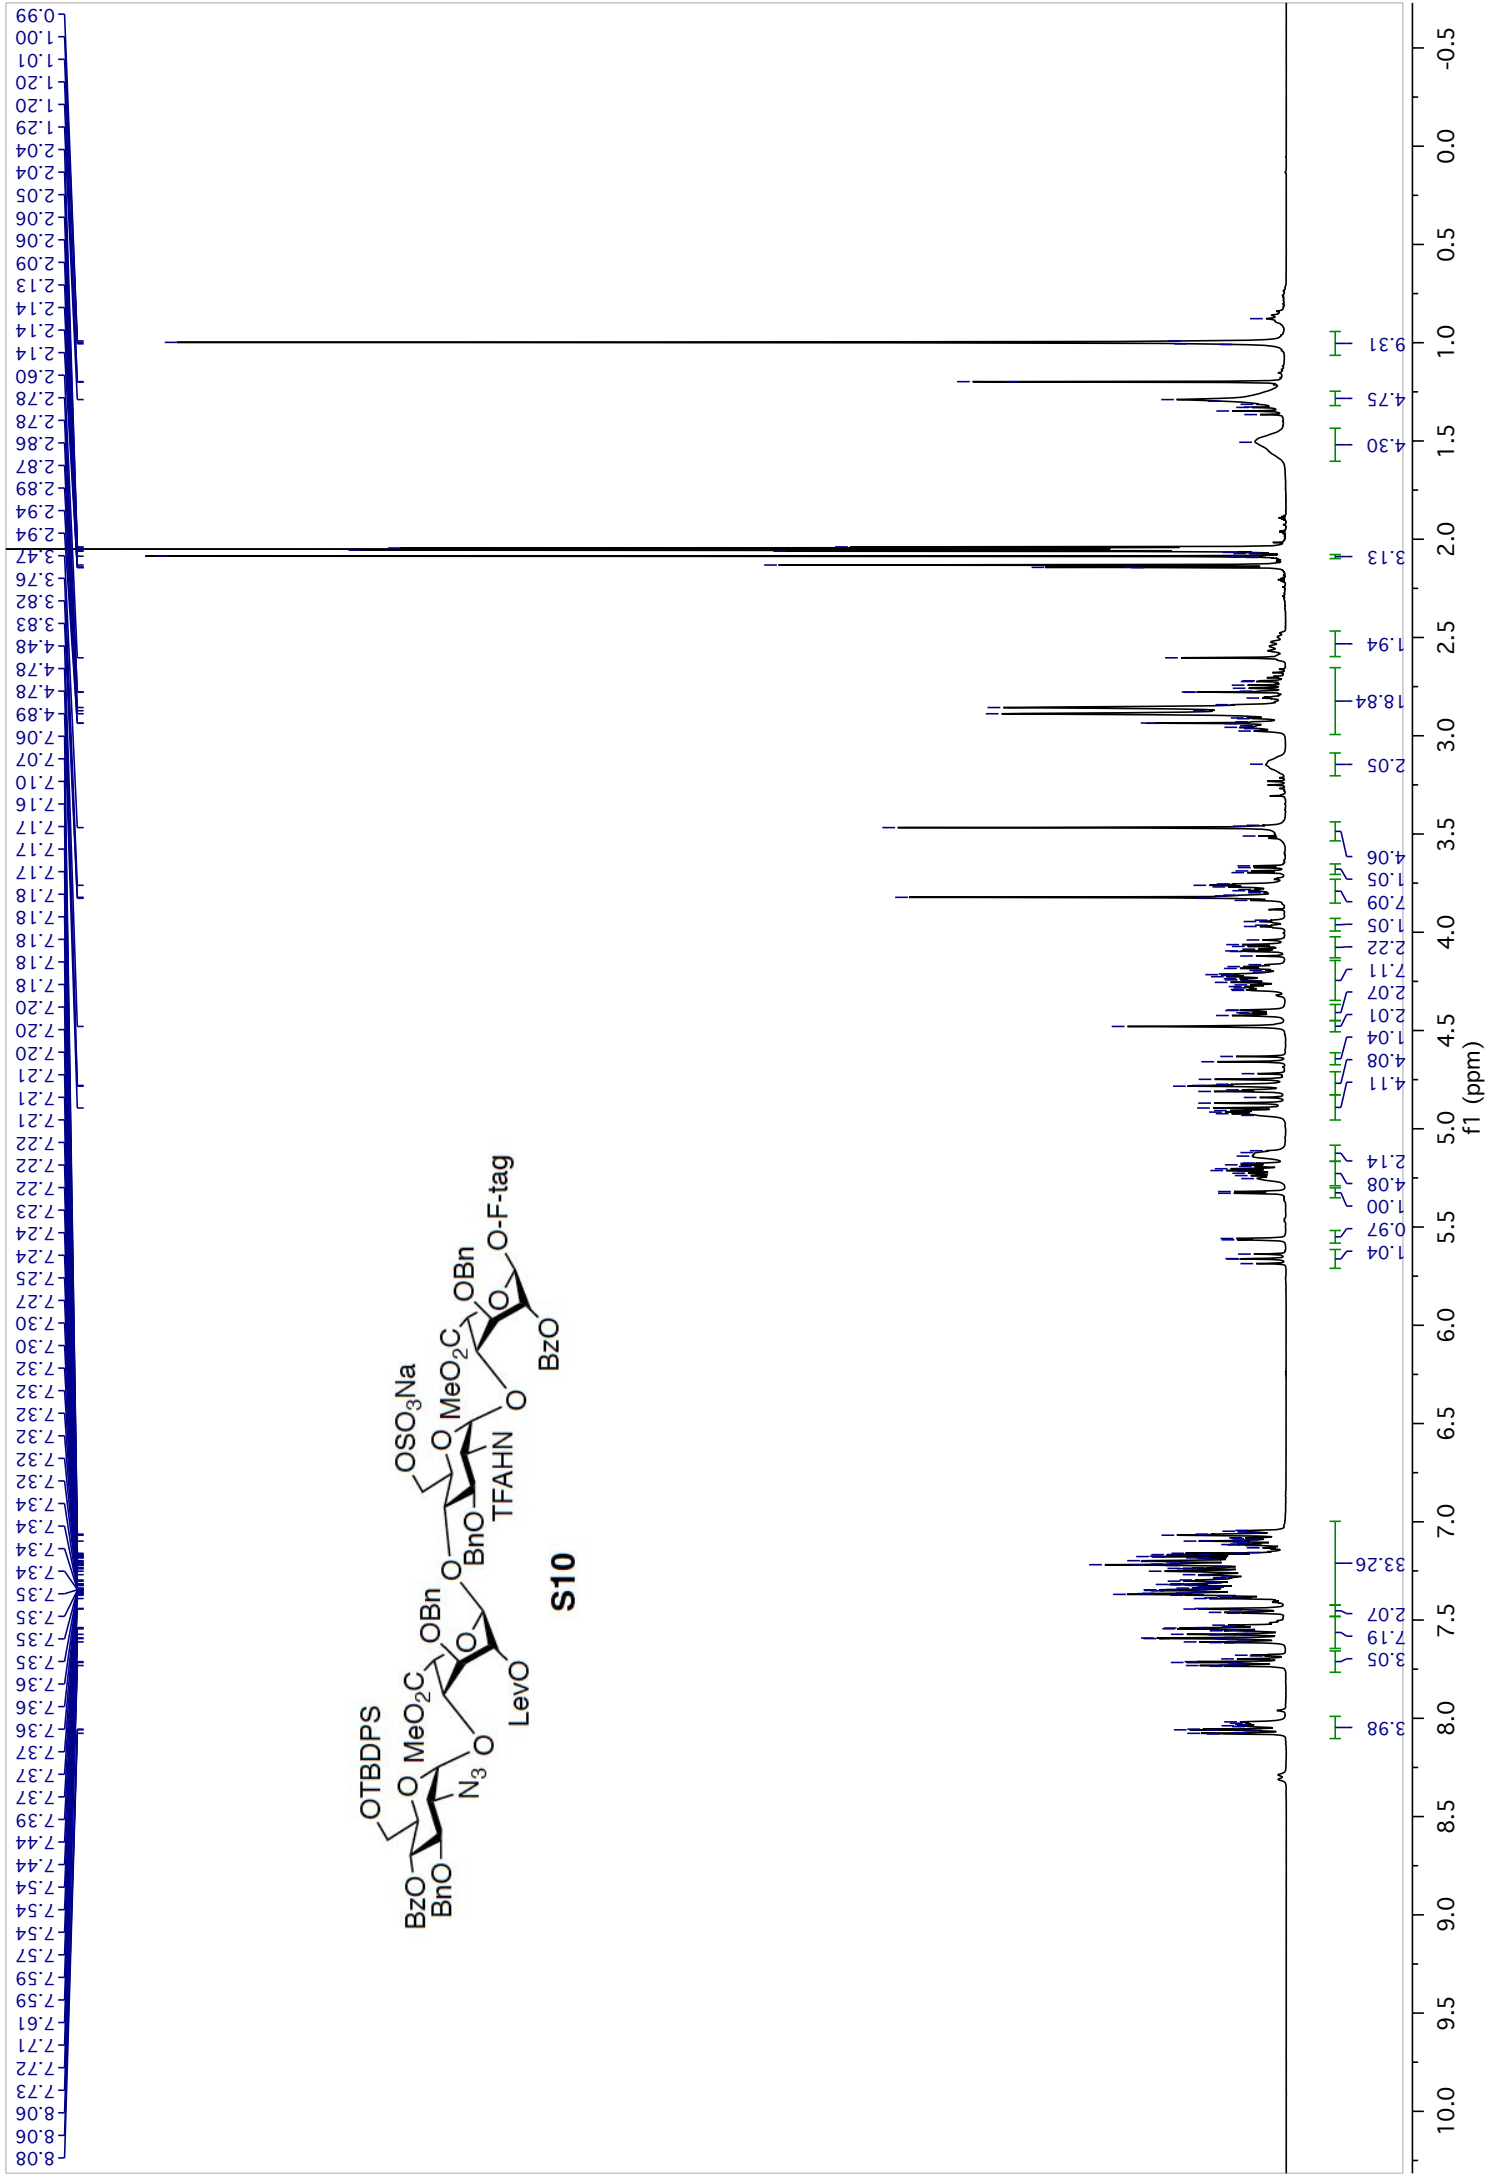

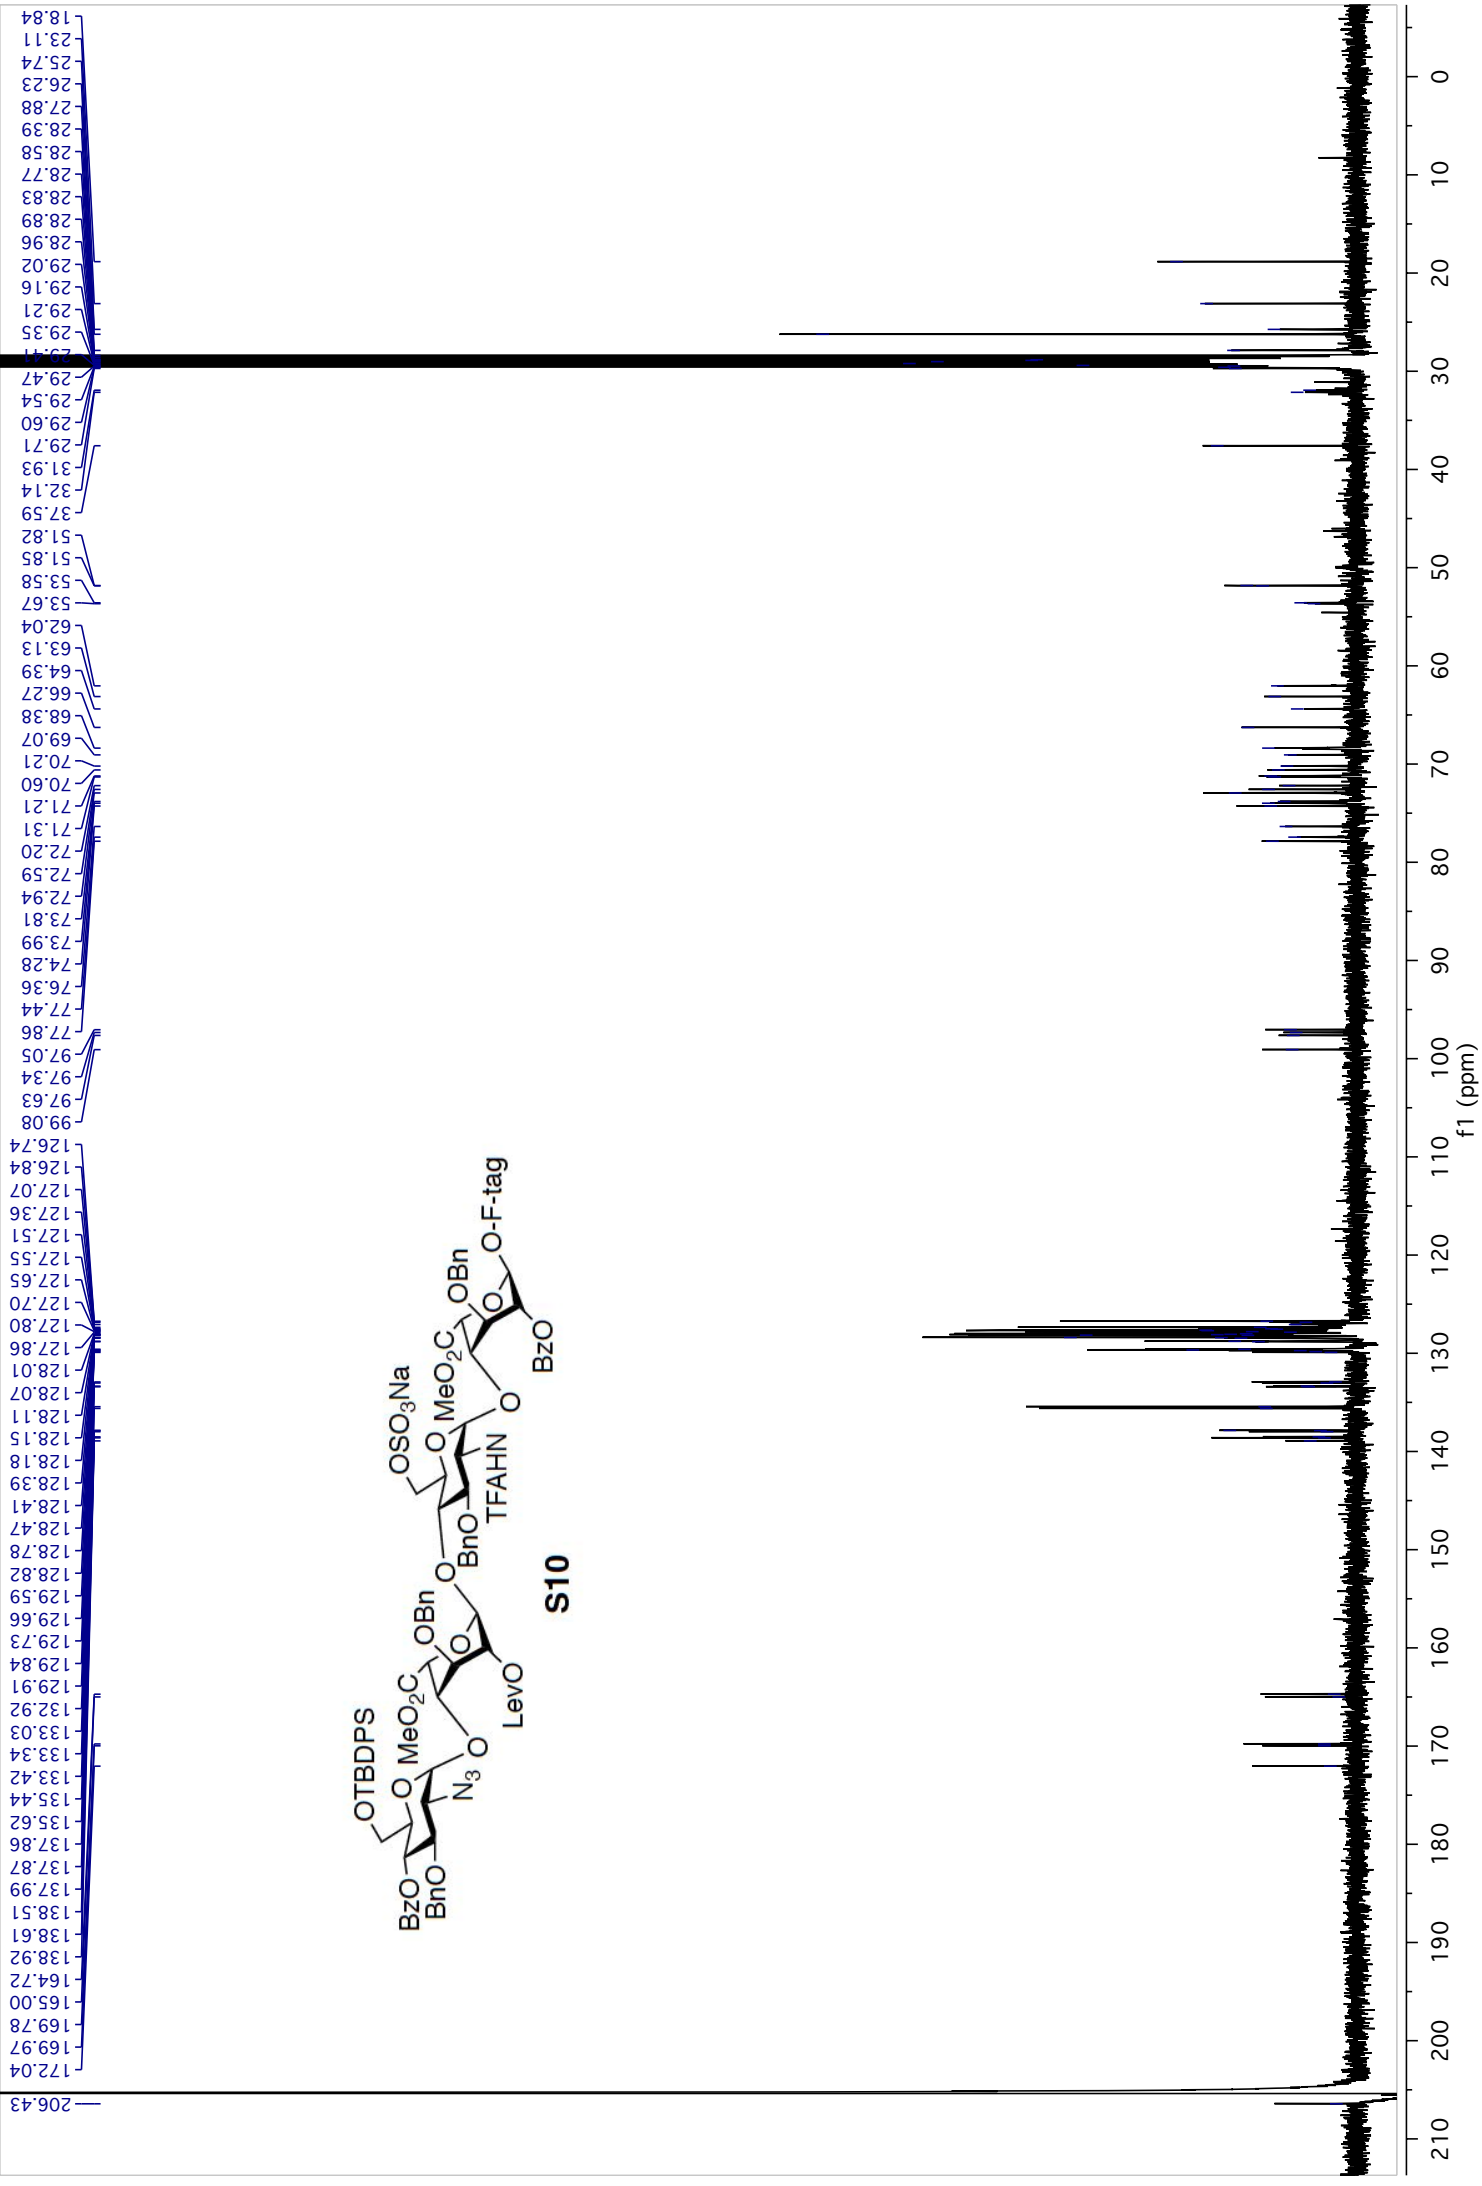



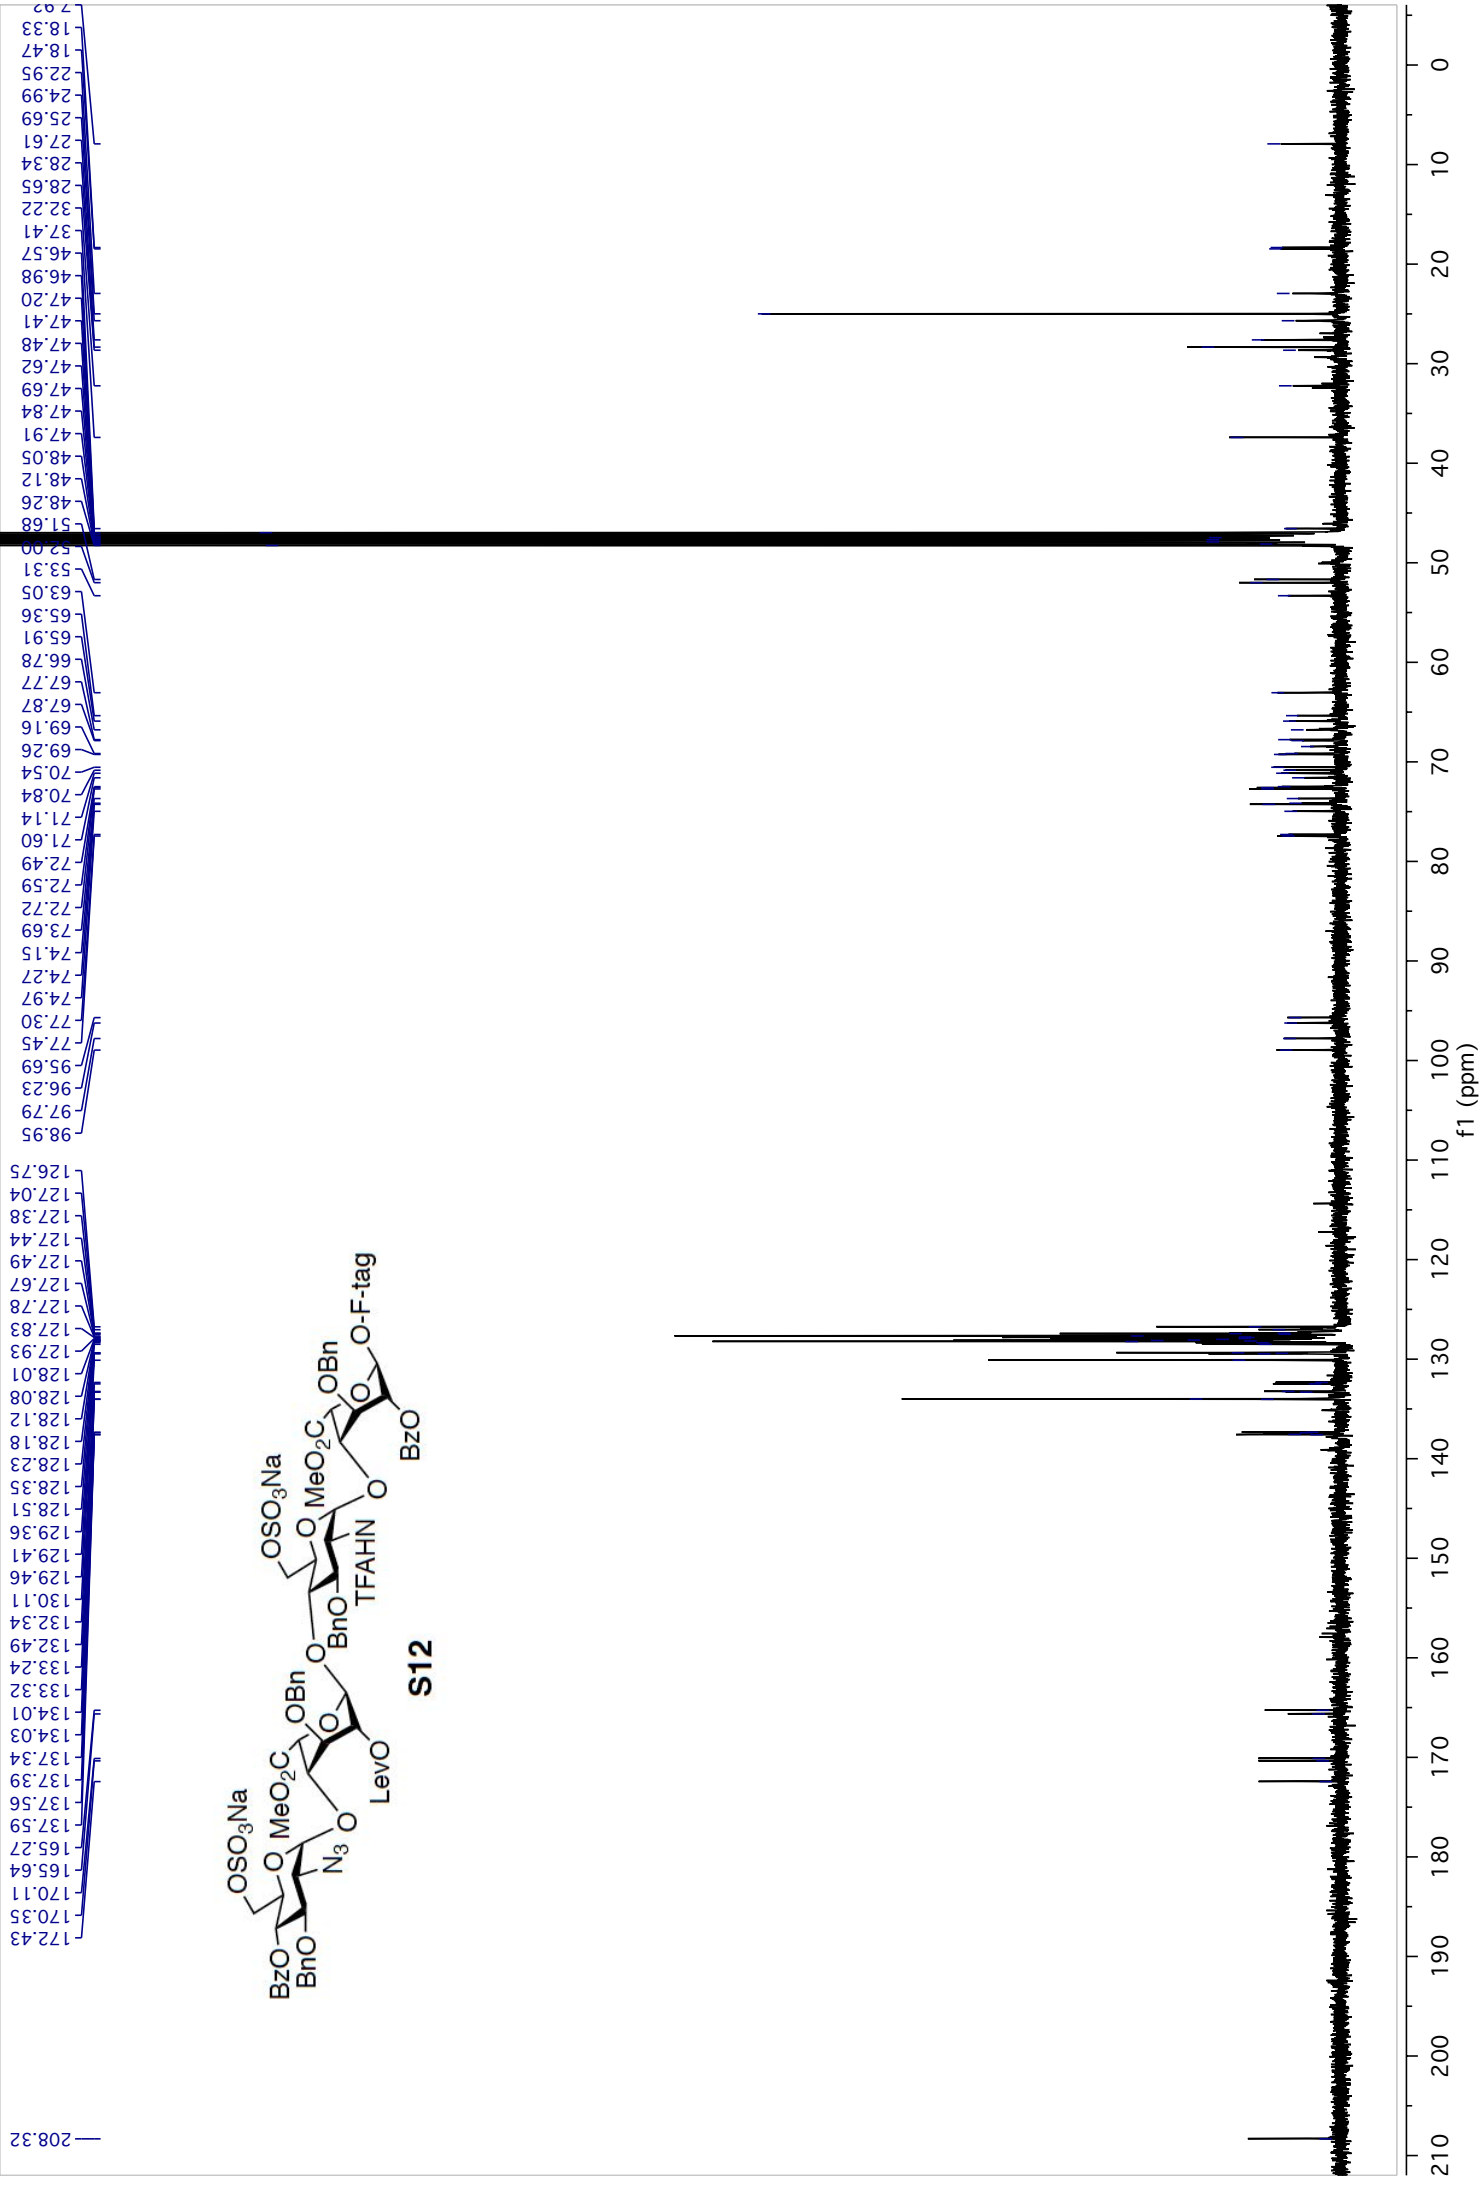

8.03 8.01 7.98 7.96 7.96 7.68 7.67 7.66 7.56 7.55 7.54 7.50 7.48 7.48 7.44 7.43 7.43 7.43 7.42 7.36 7.35 7.35 7.34 7.34 7.33 7.33 7.33 7.32 7.32 7.31 7.31 7.31 7.30 7.30 7.29 7.29 7.29 7.29 7.28 7.28 7.26 7.20 7.20 7.18 7.18 7.17 7.17 7.15 7.15 4.87 4.87 4.80 4.78 4.71 4.57 4.54 3.97 3.96 3.89 3.81 3.67 3.29 2.19 1.03

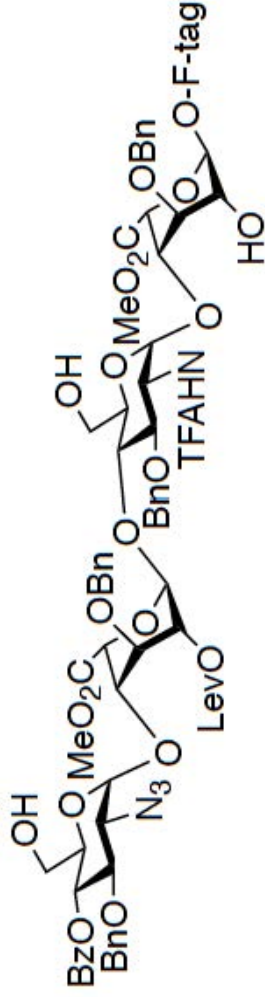

S13

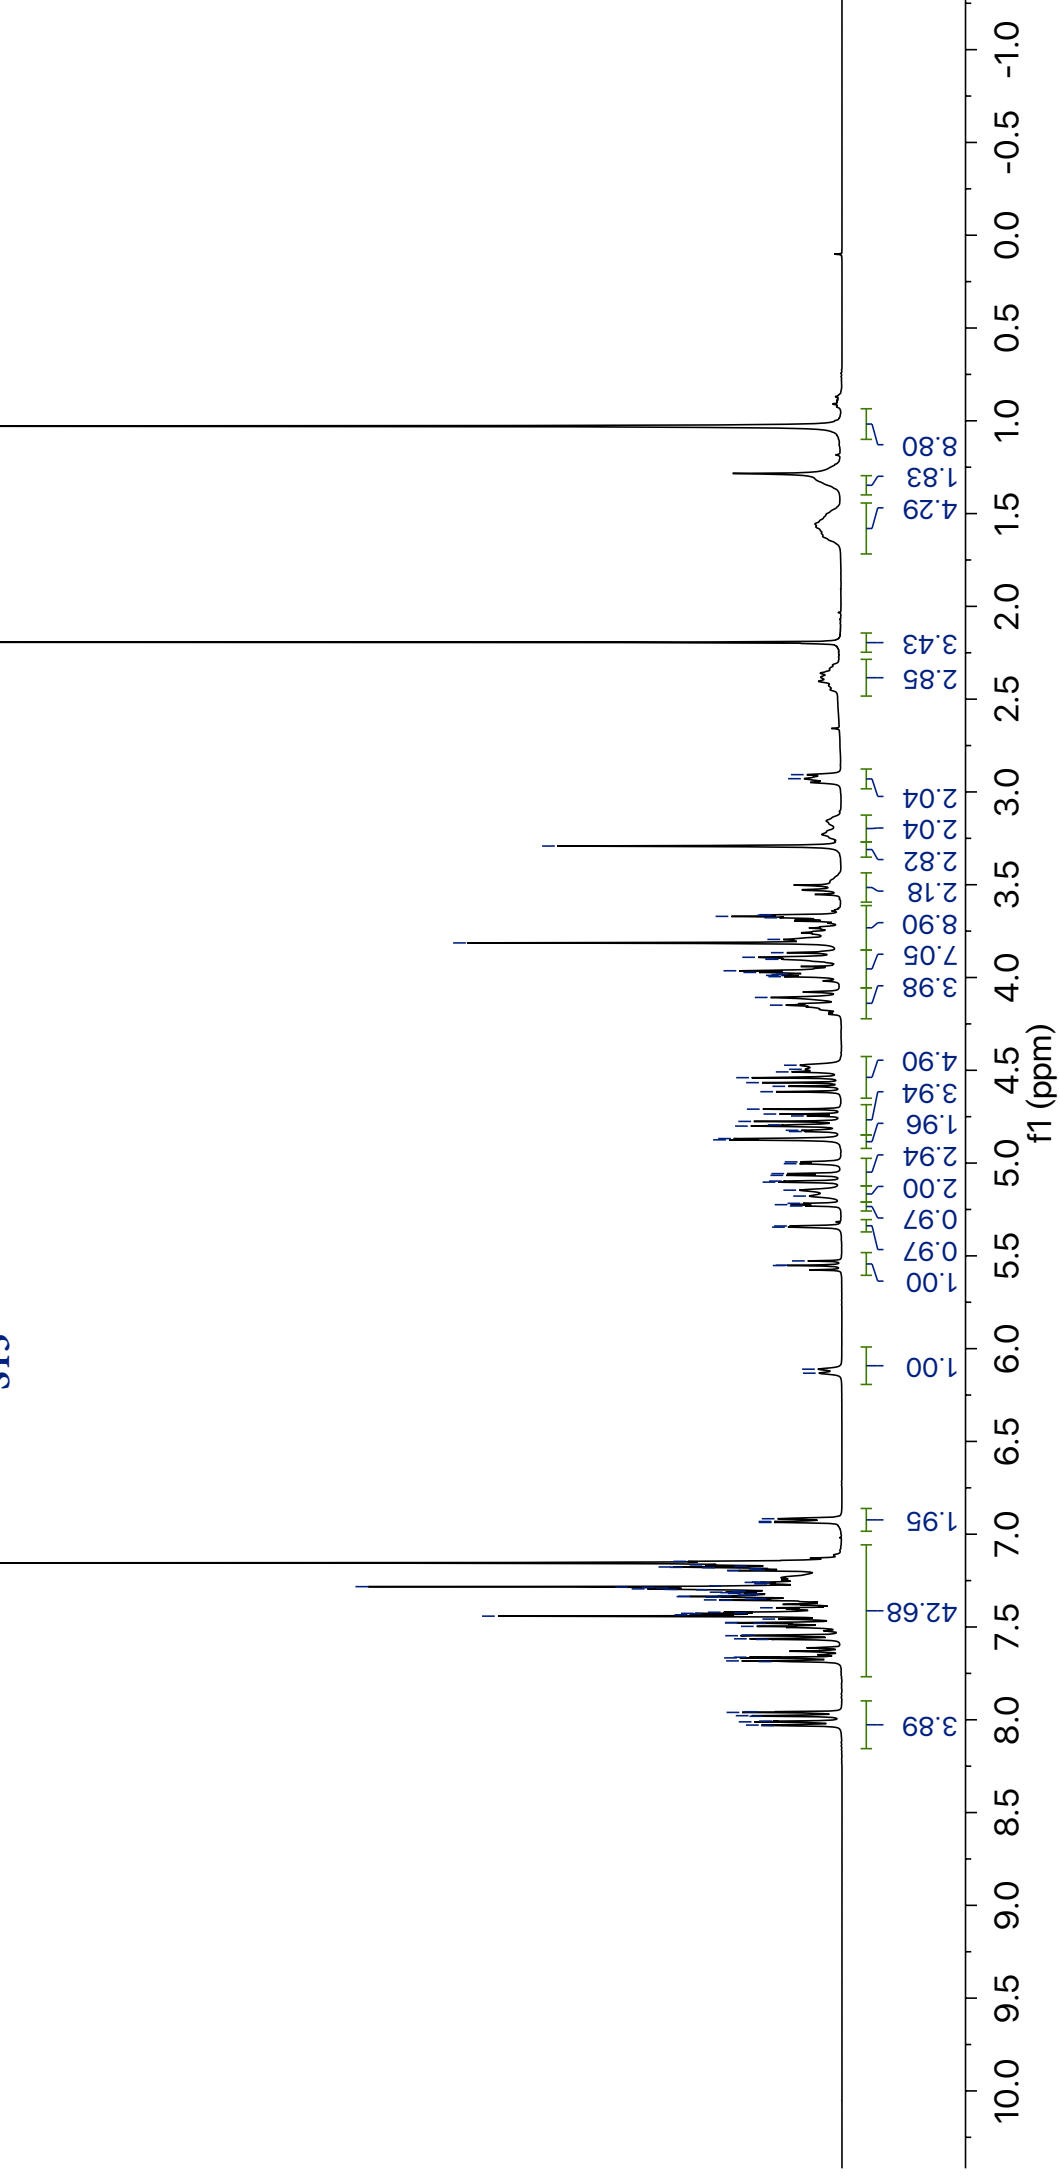

WL-2-083-De-Nap-De-Lev-C.1.1.1r —

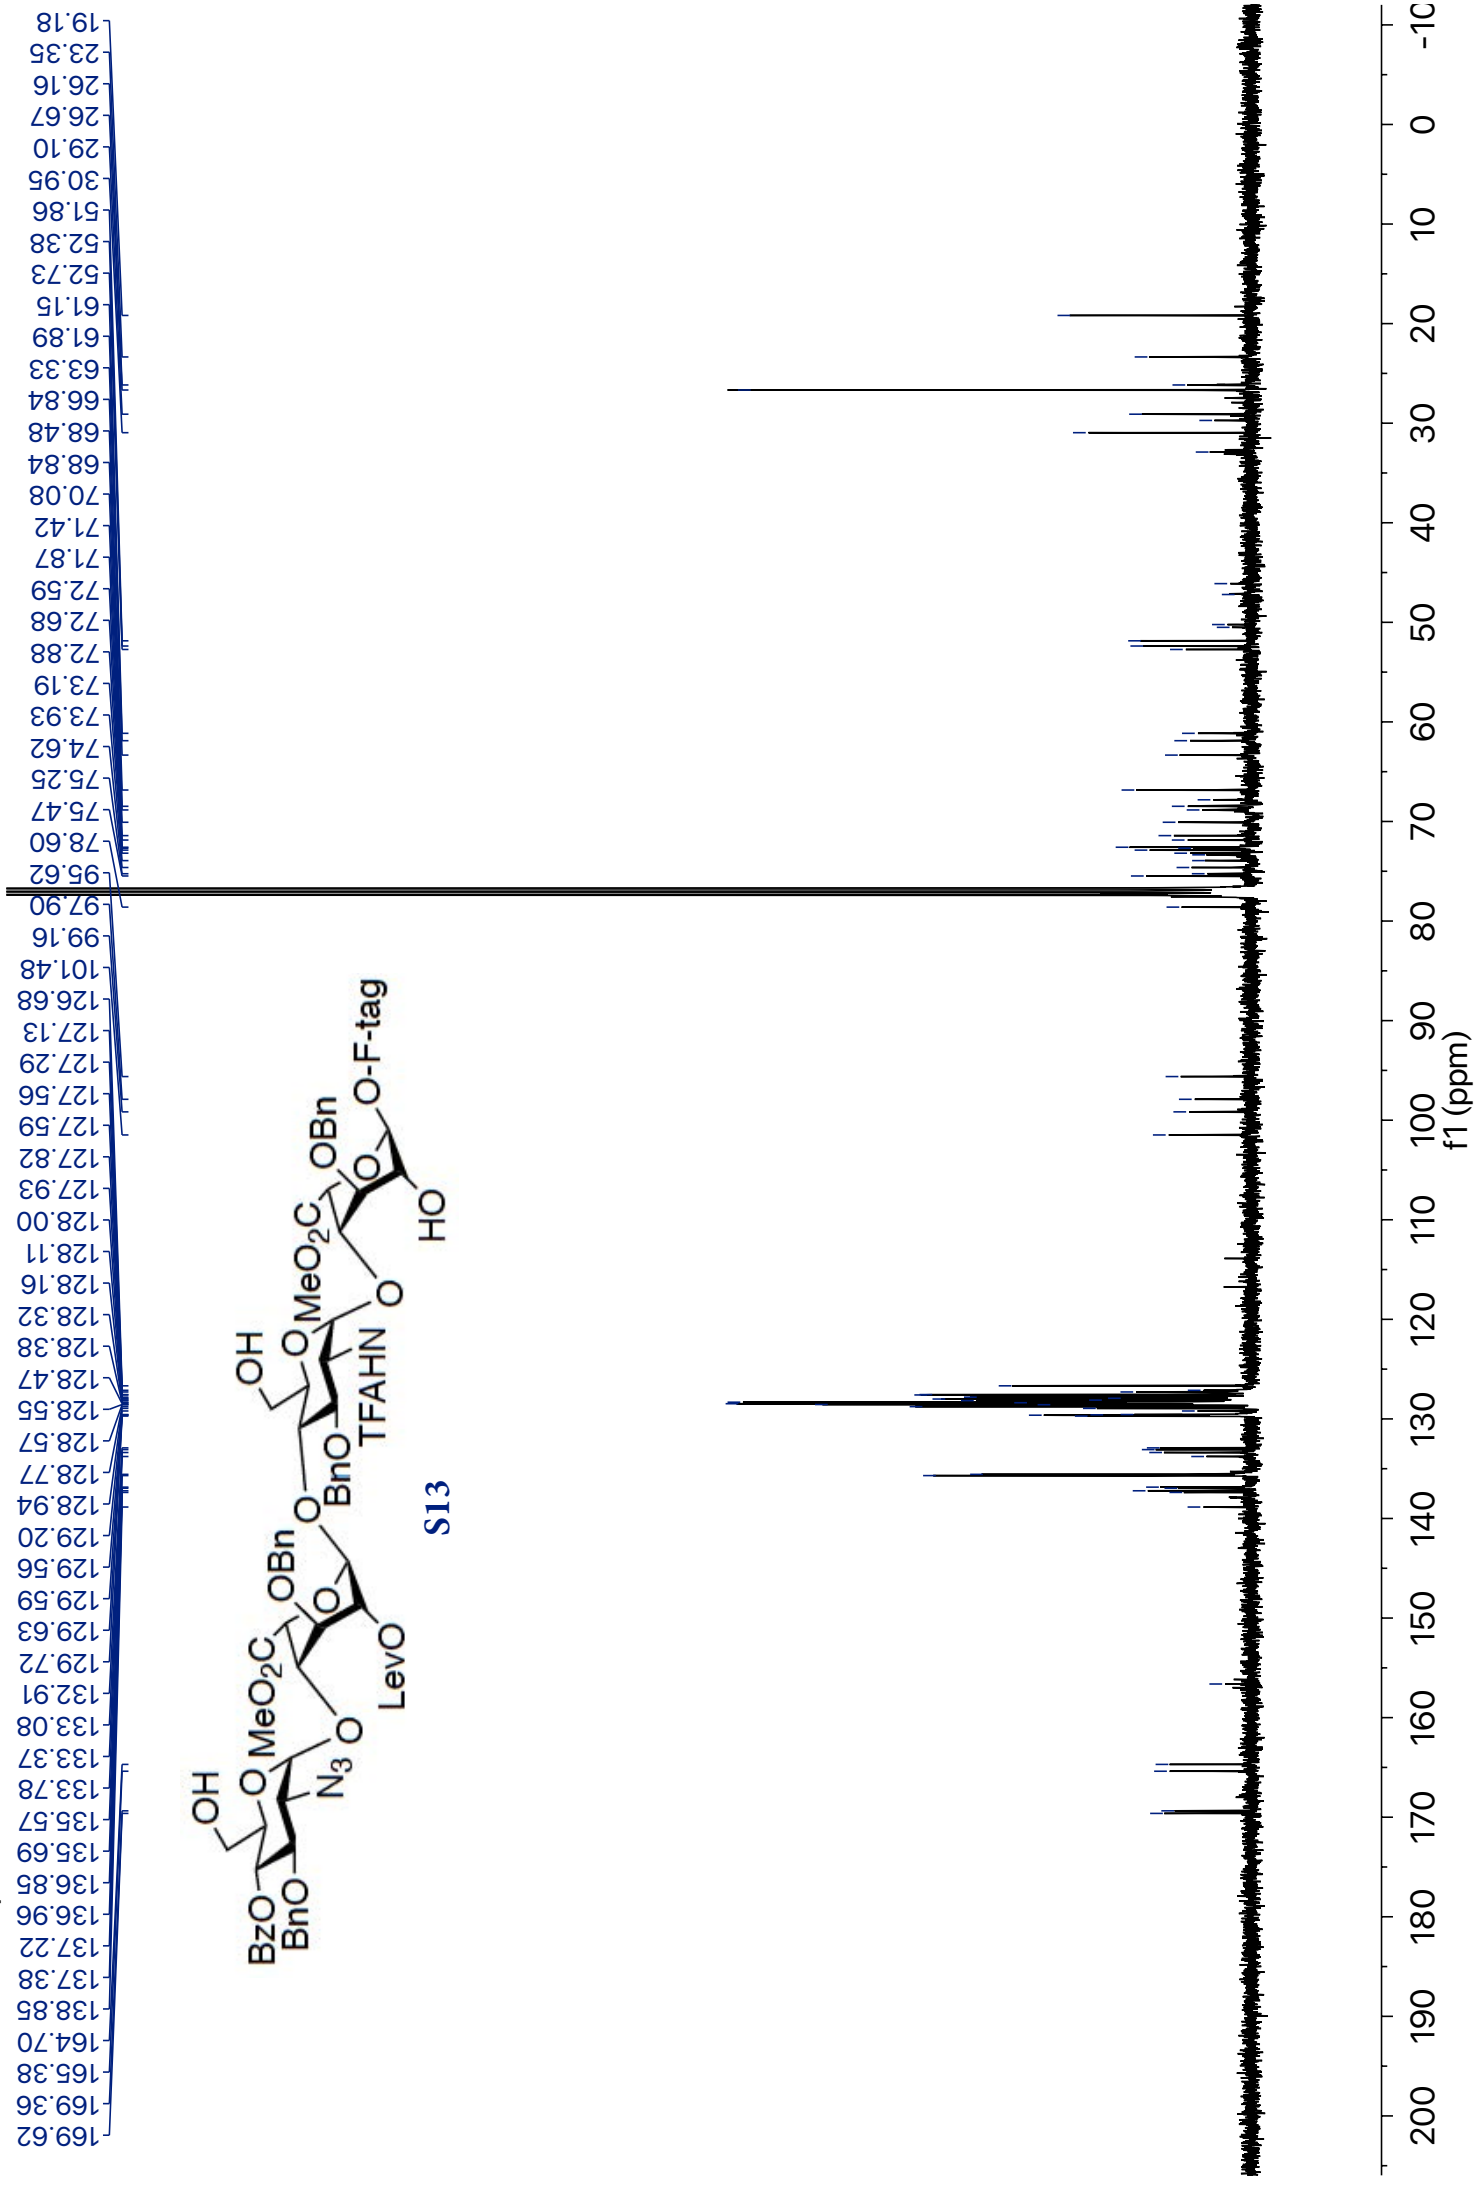





WL-2-214-C-2-Sulf-B-6-Sulf-prod-C.4.1.1r —

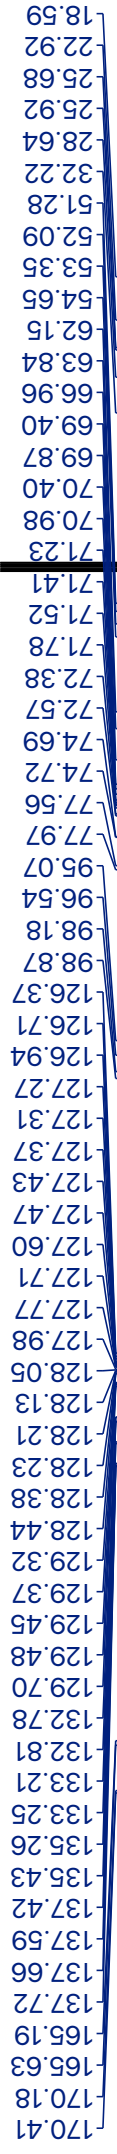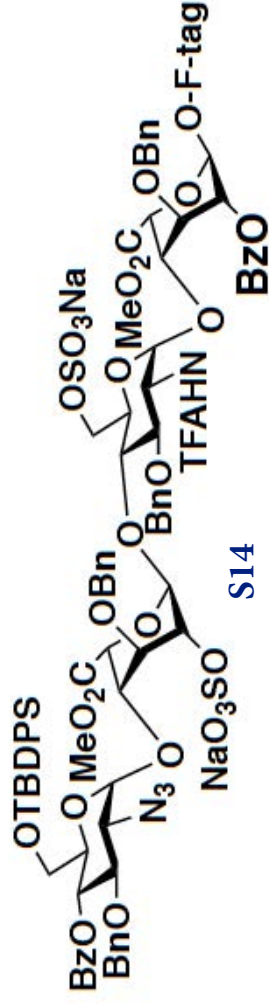

f1 (ppm)

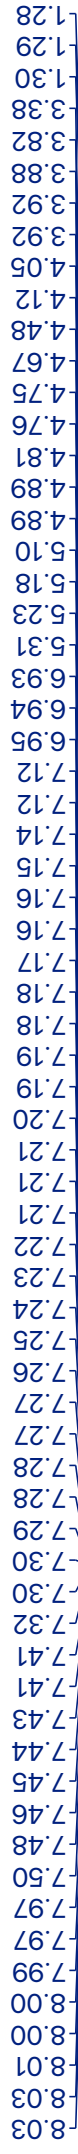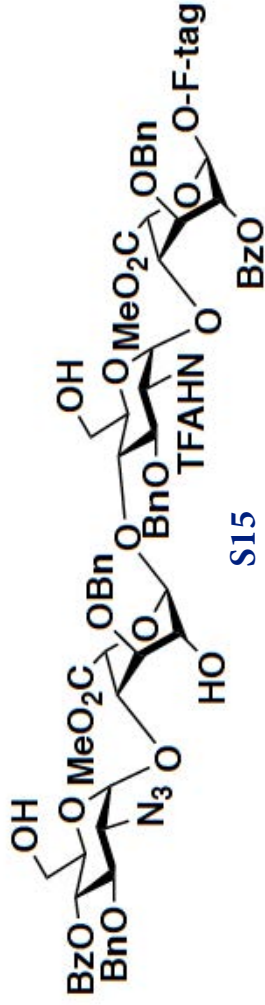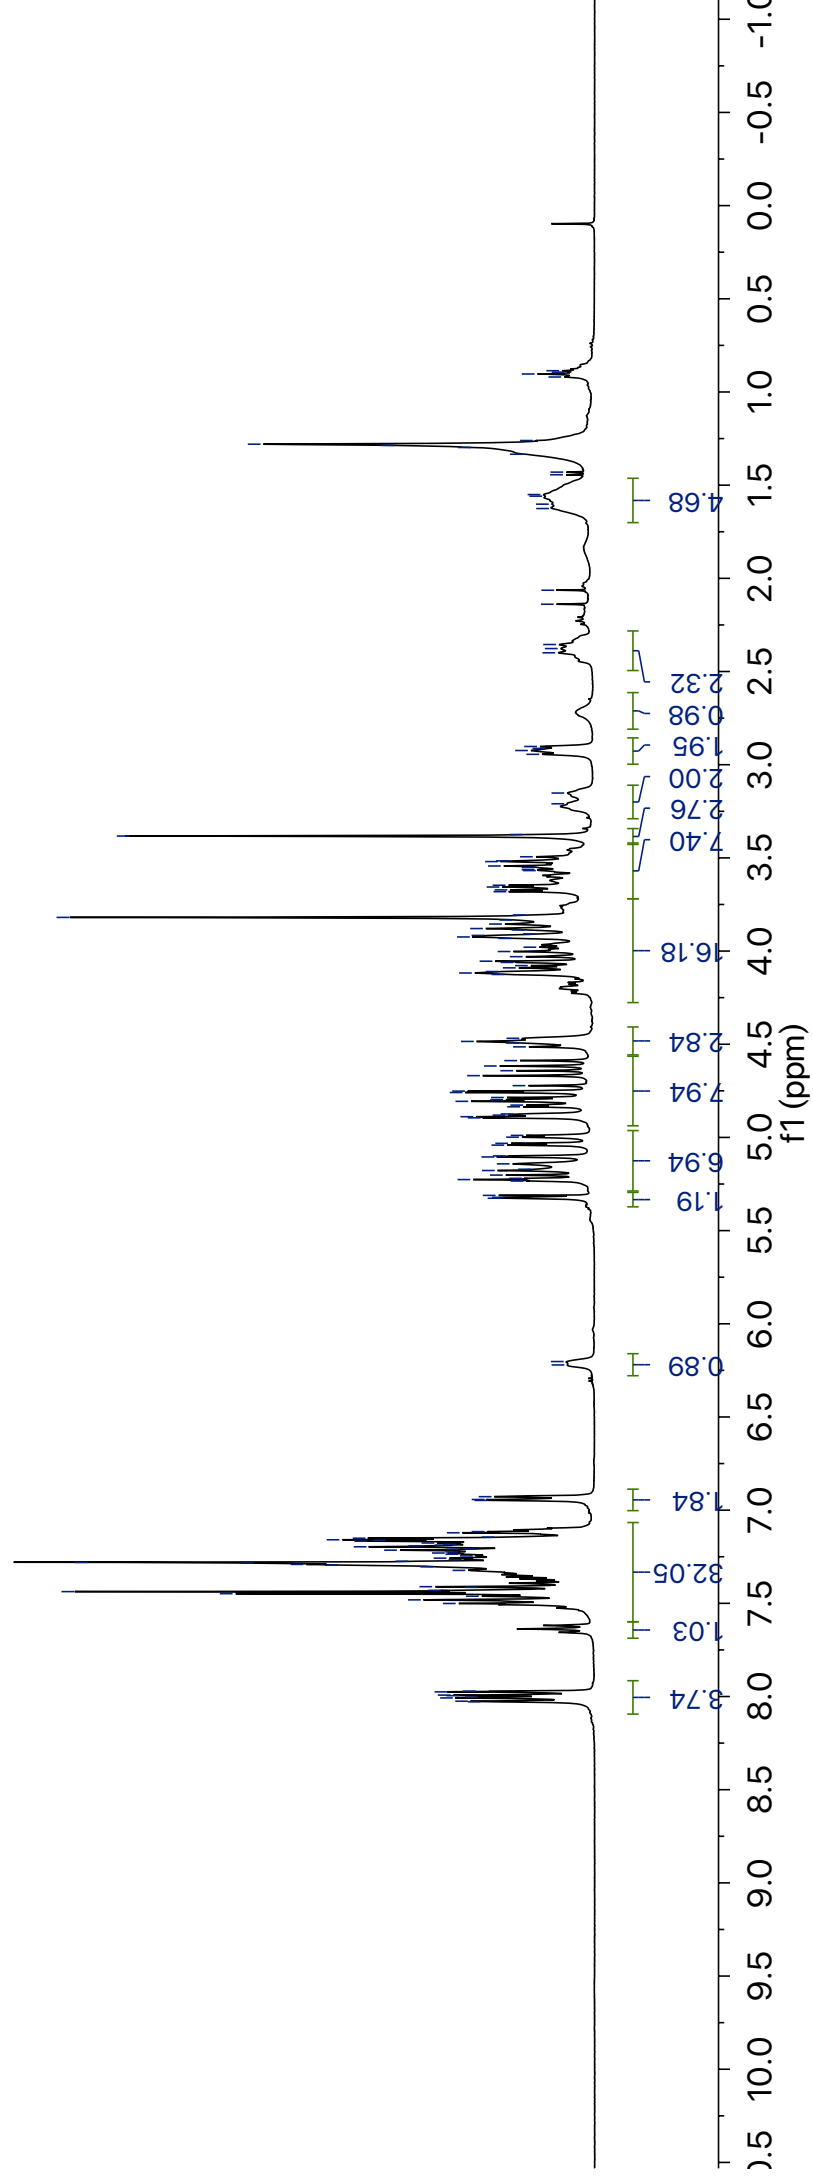





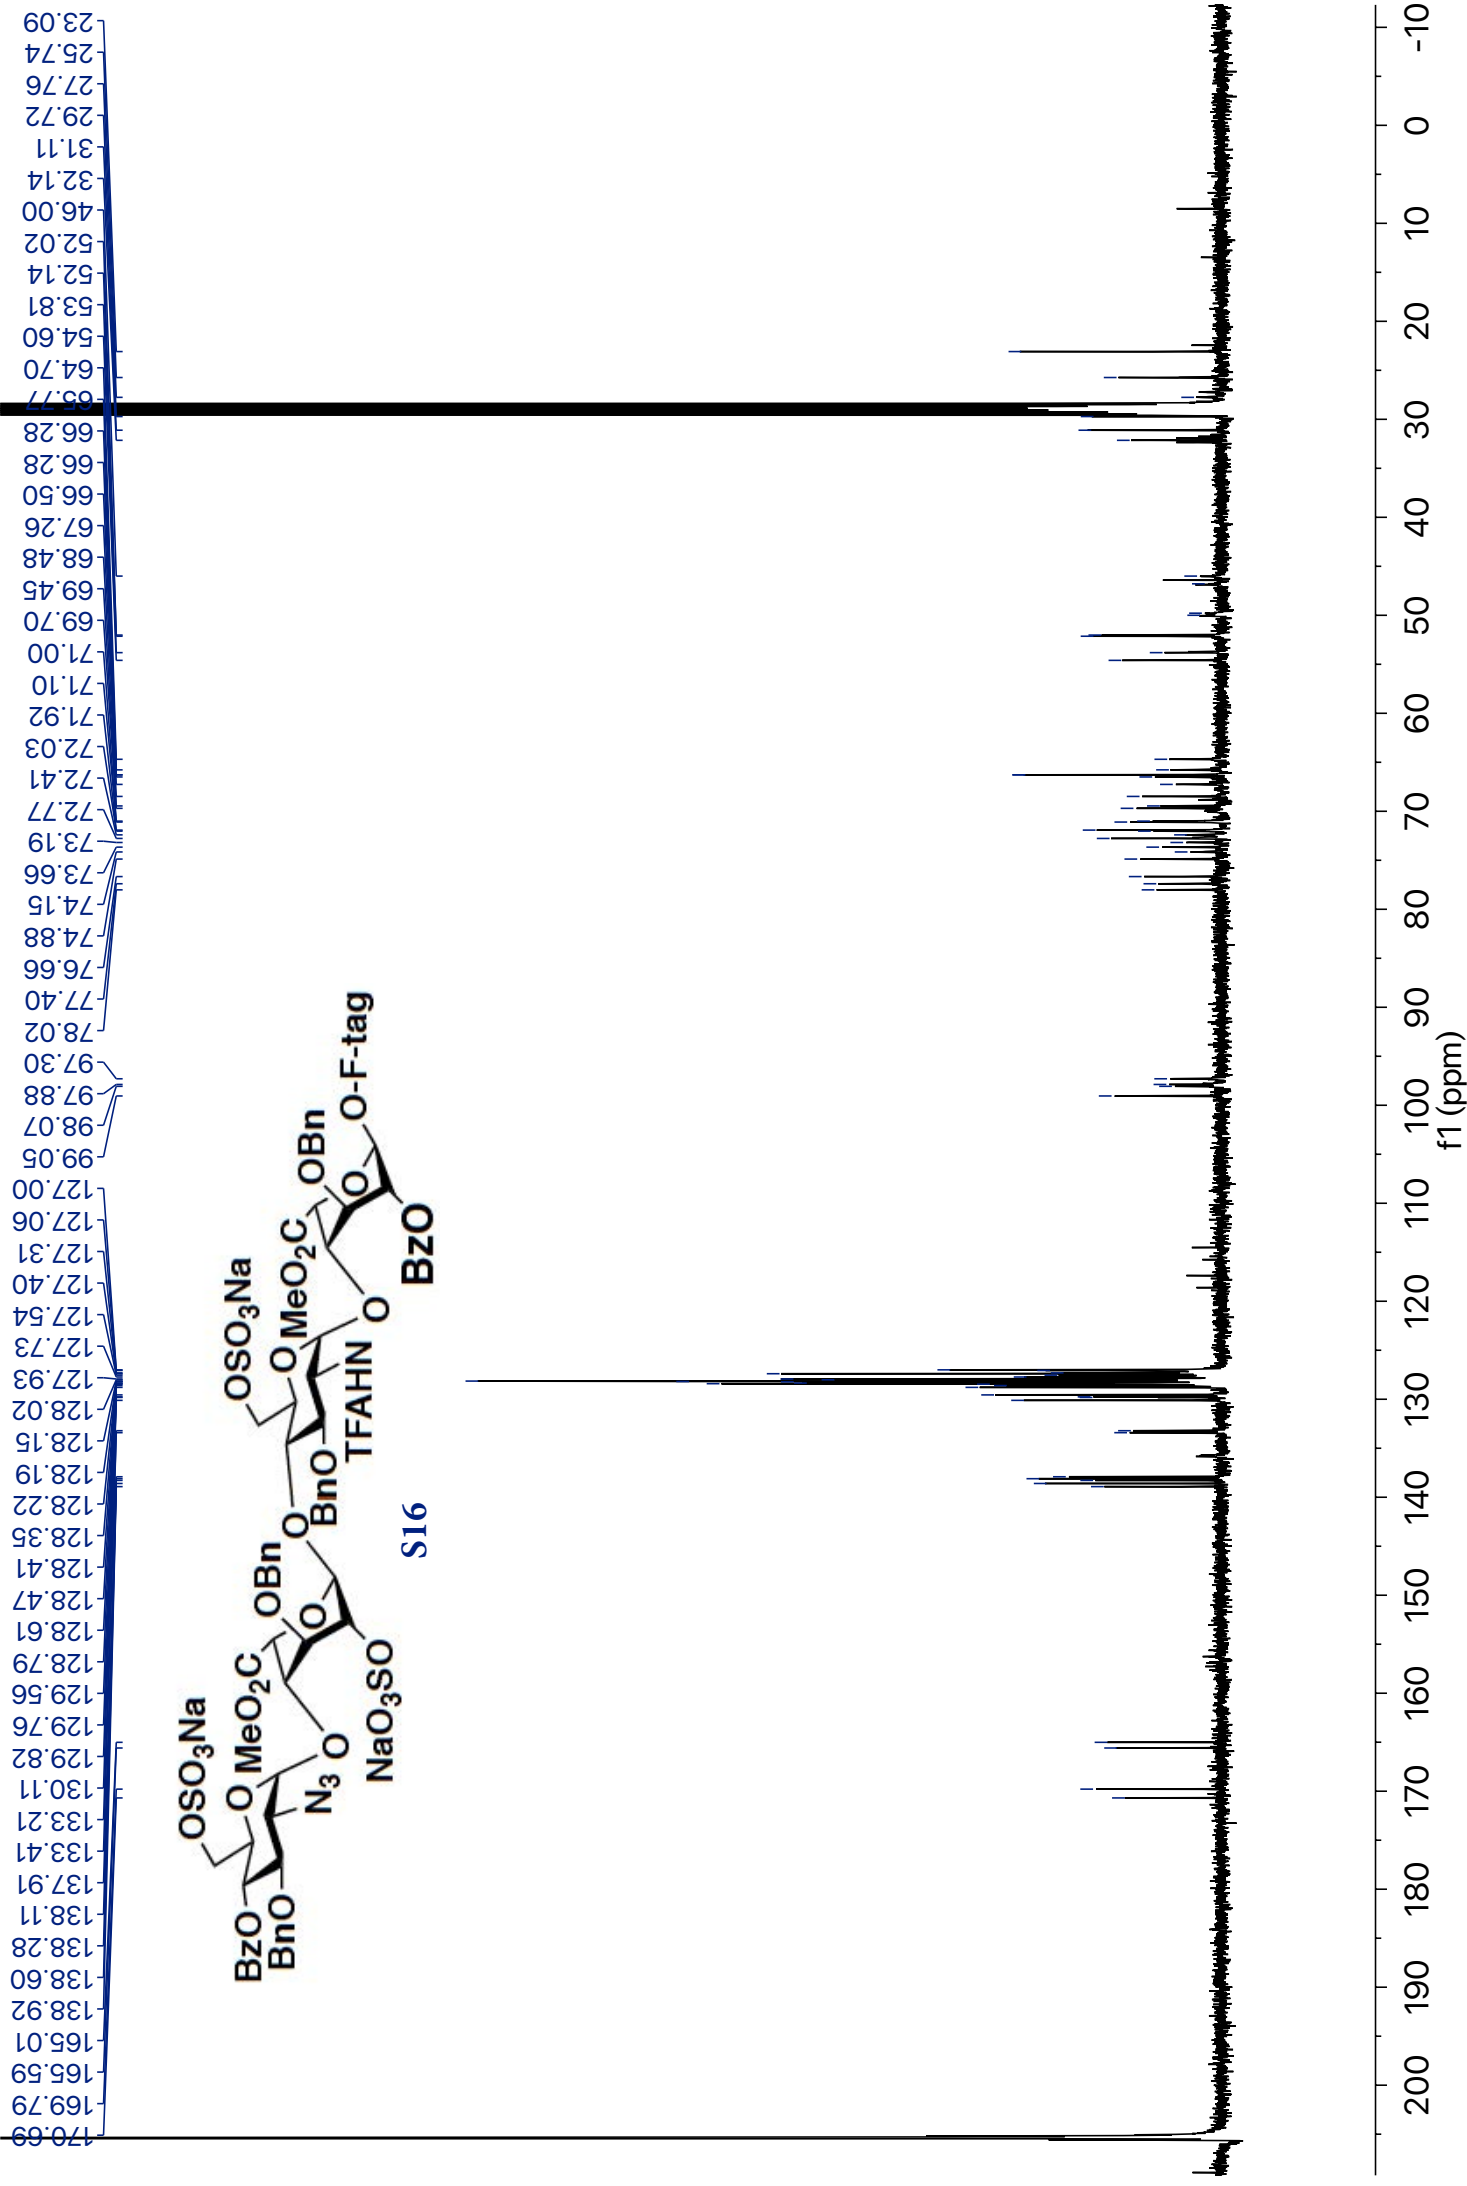



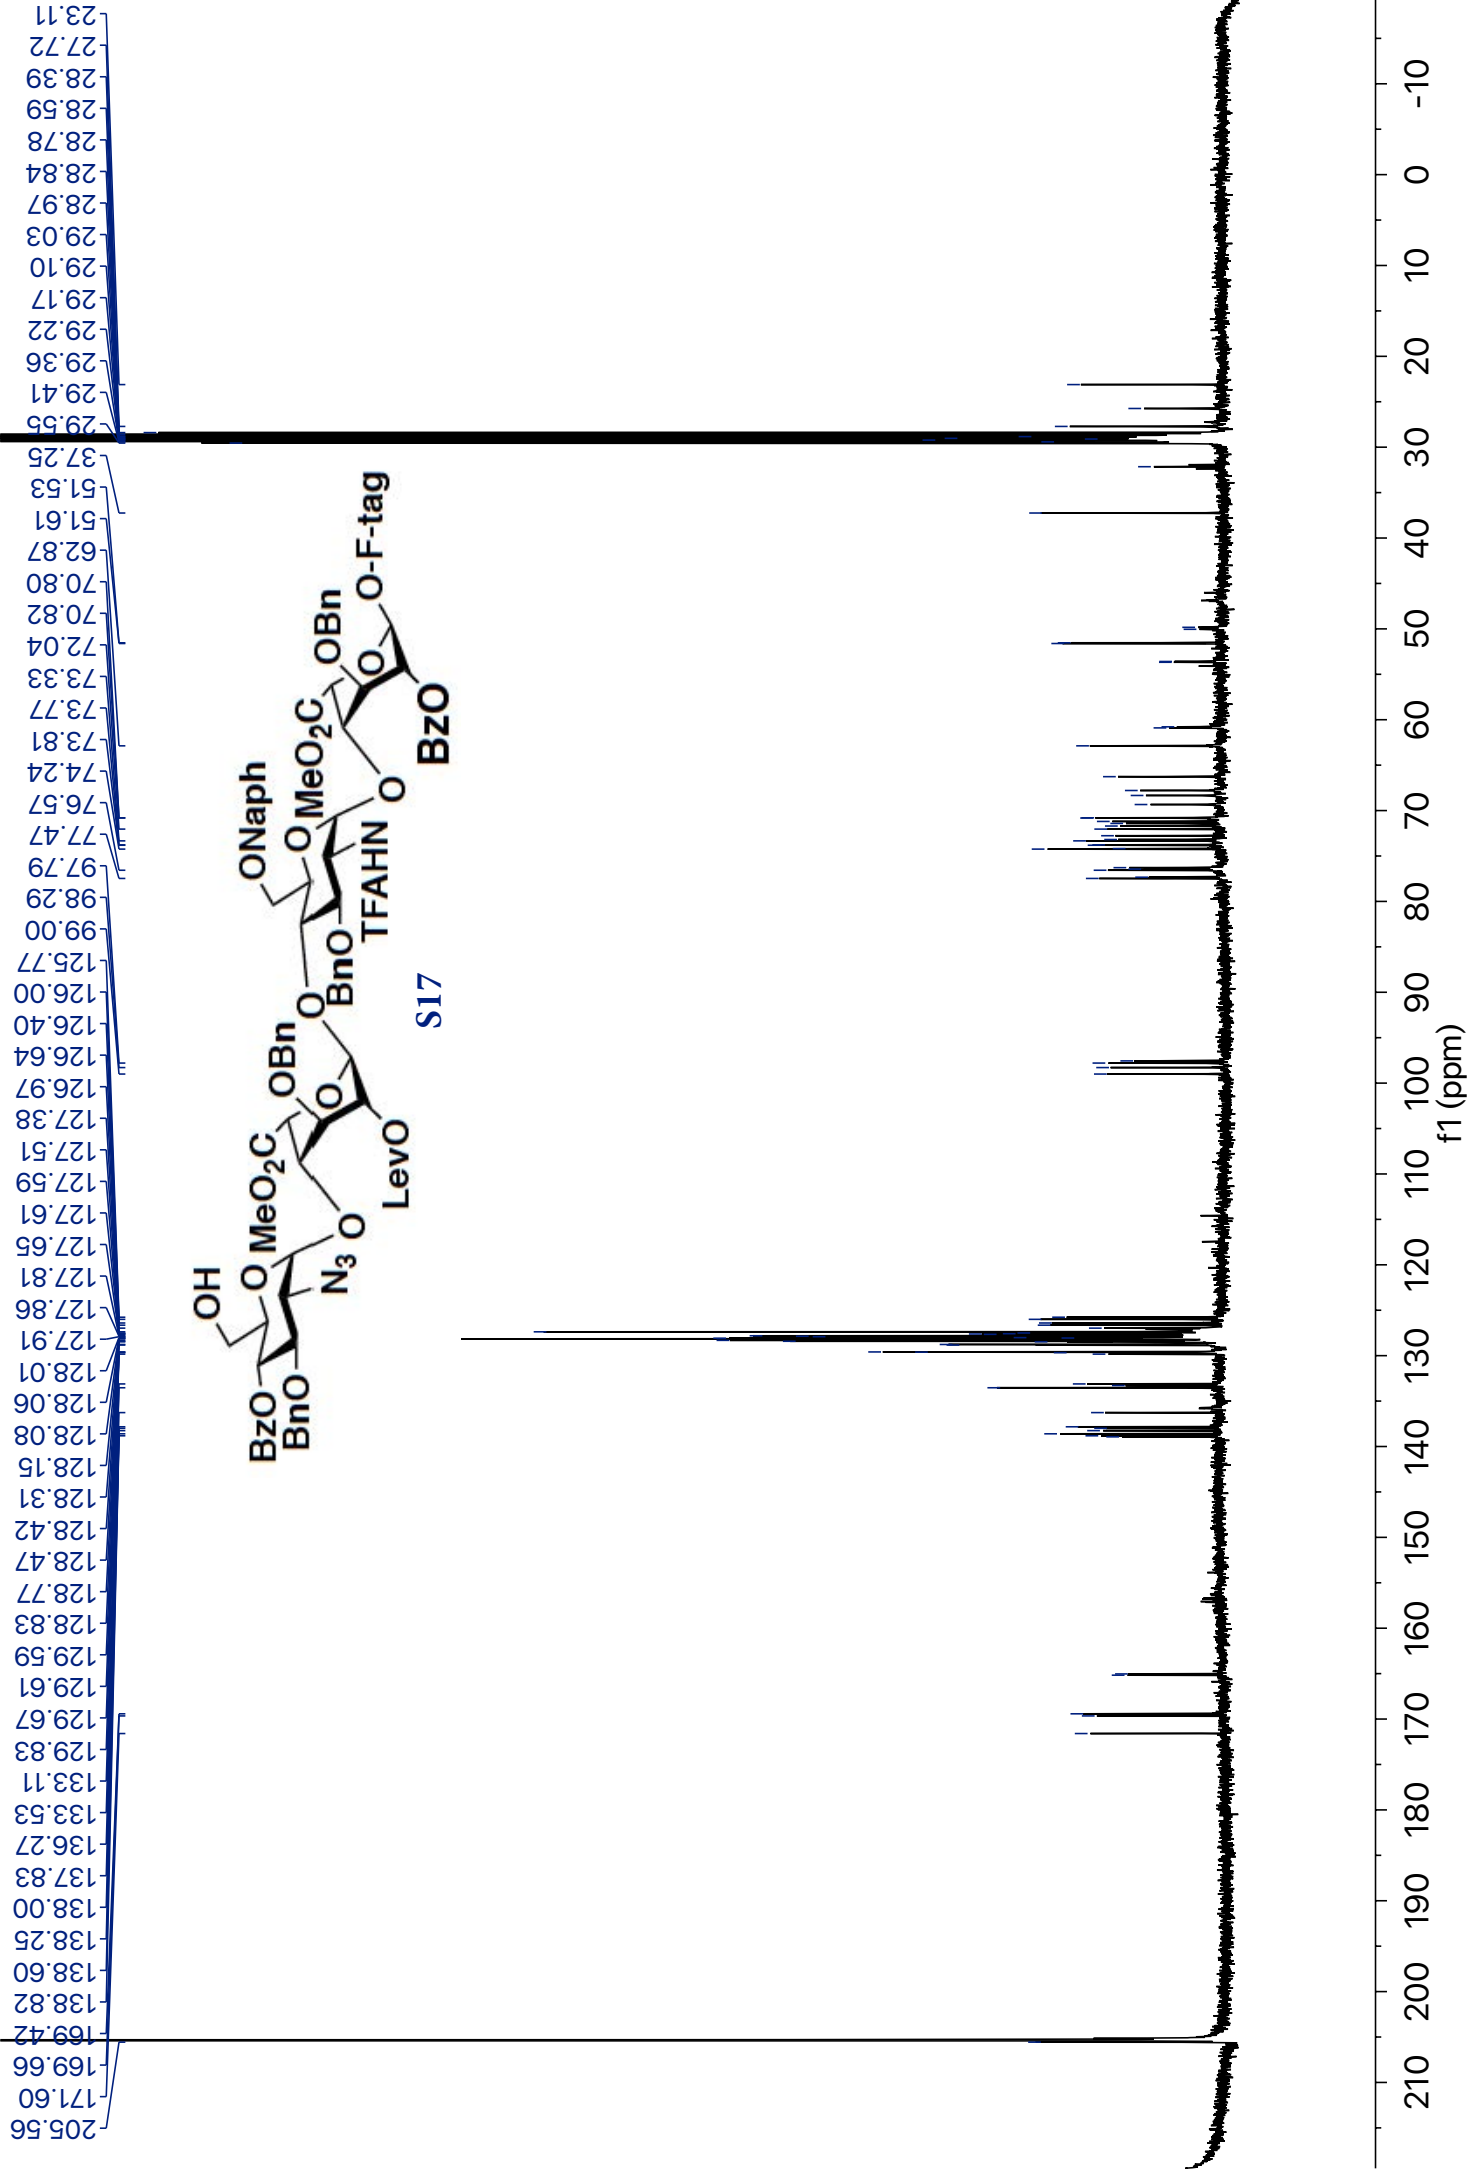



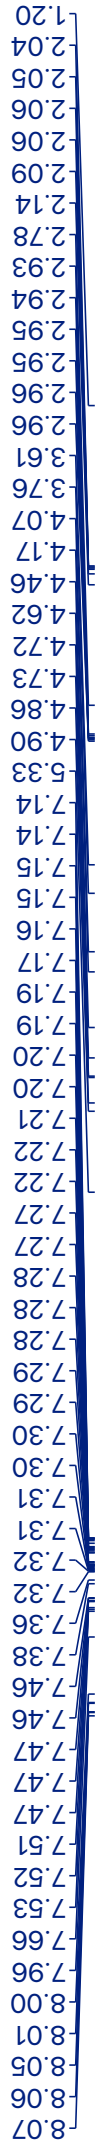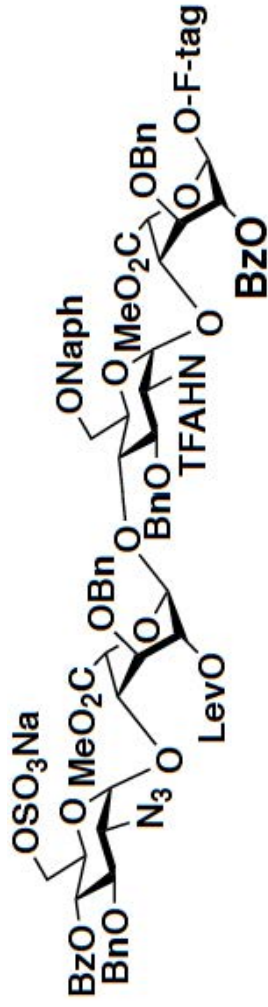

S18

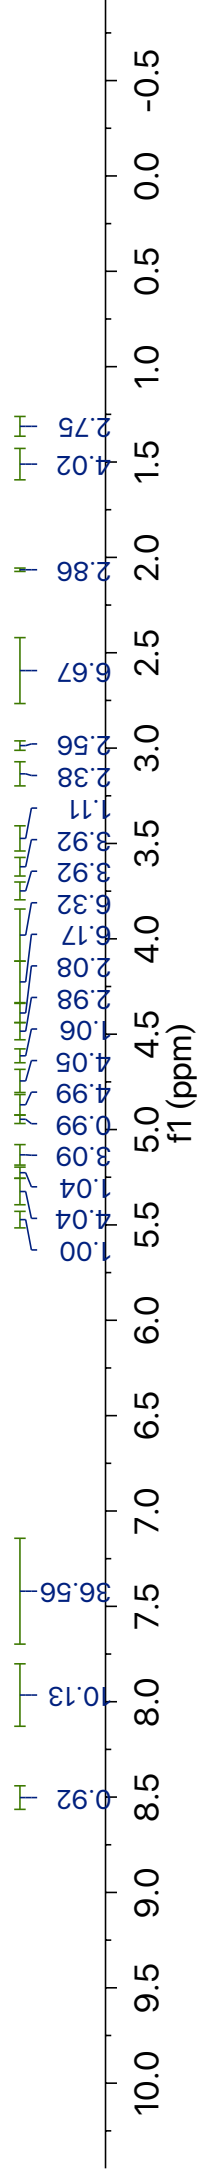

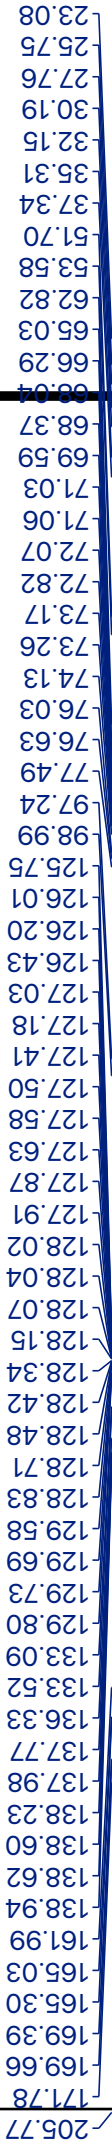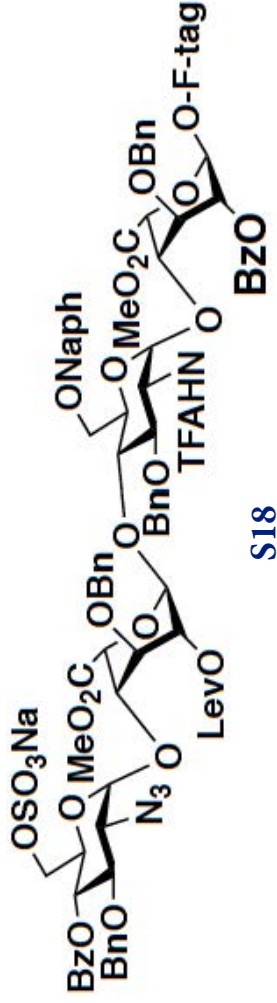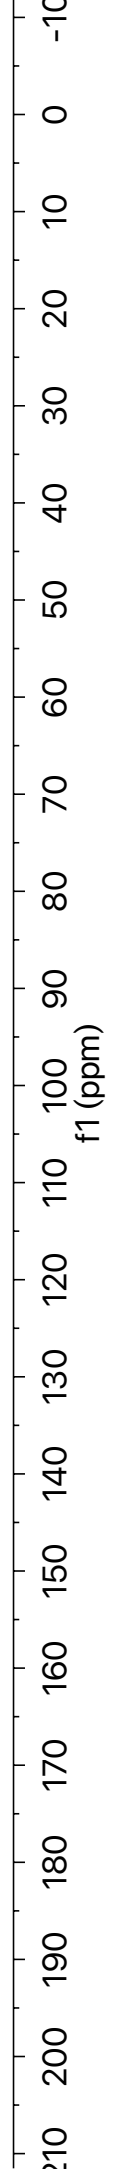

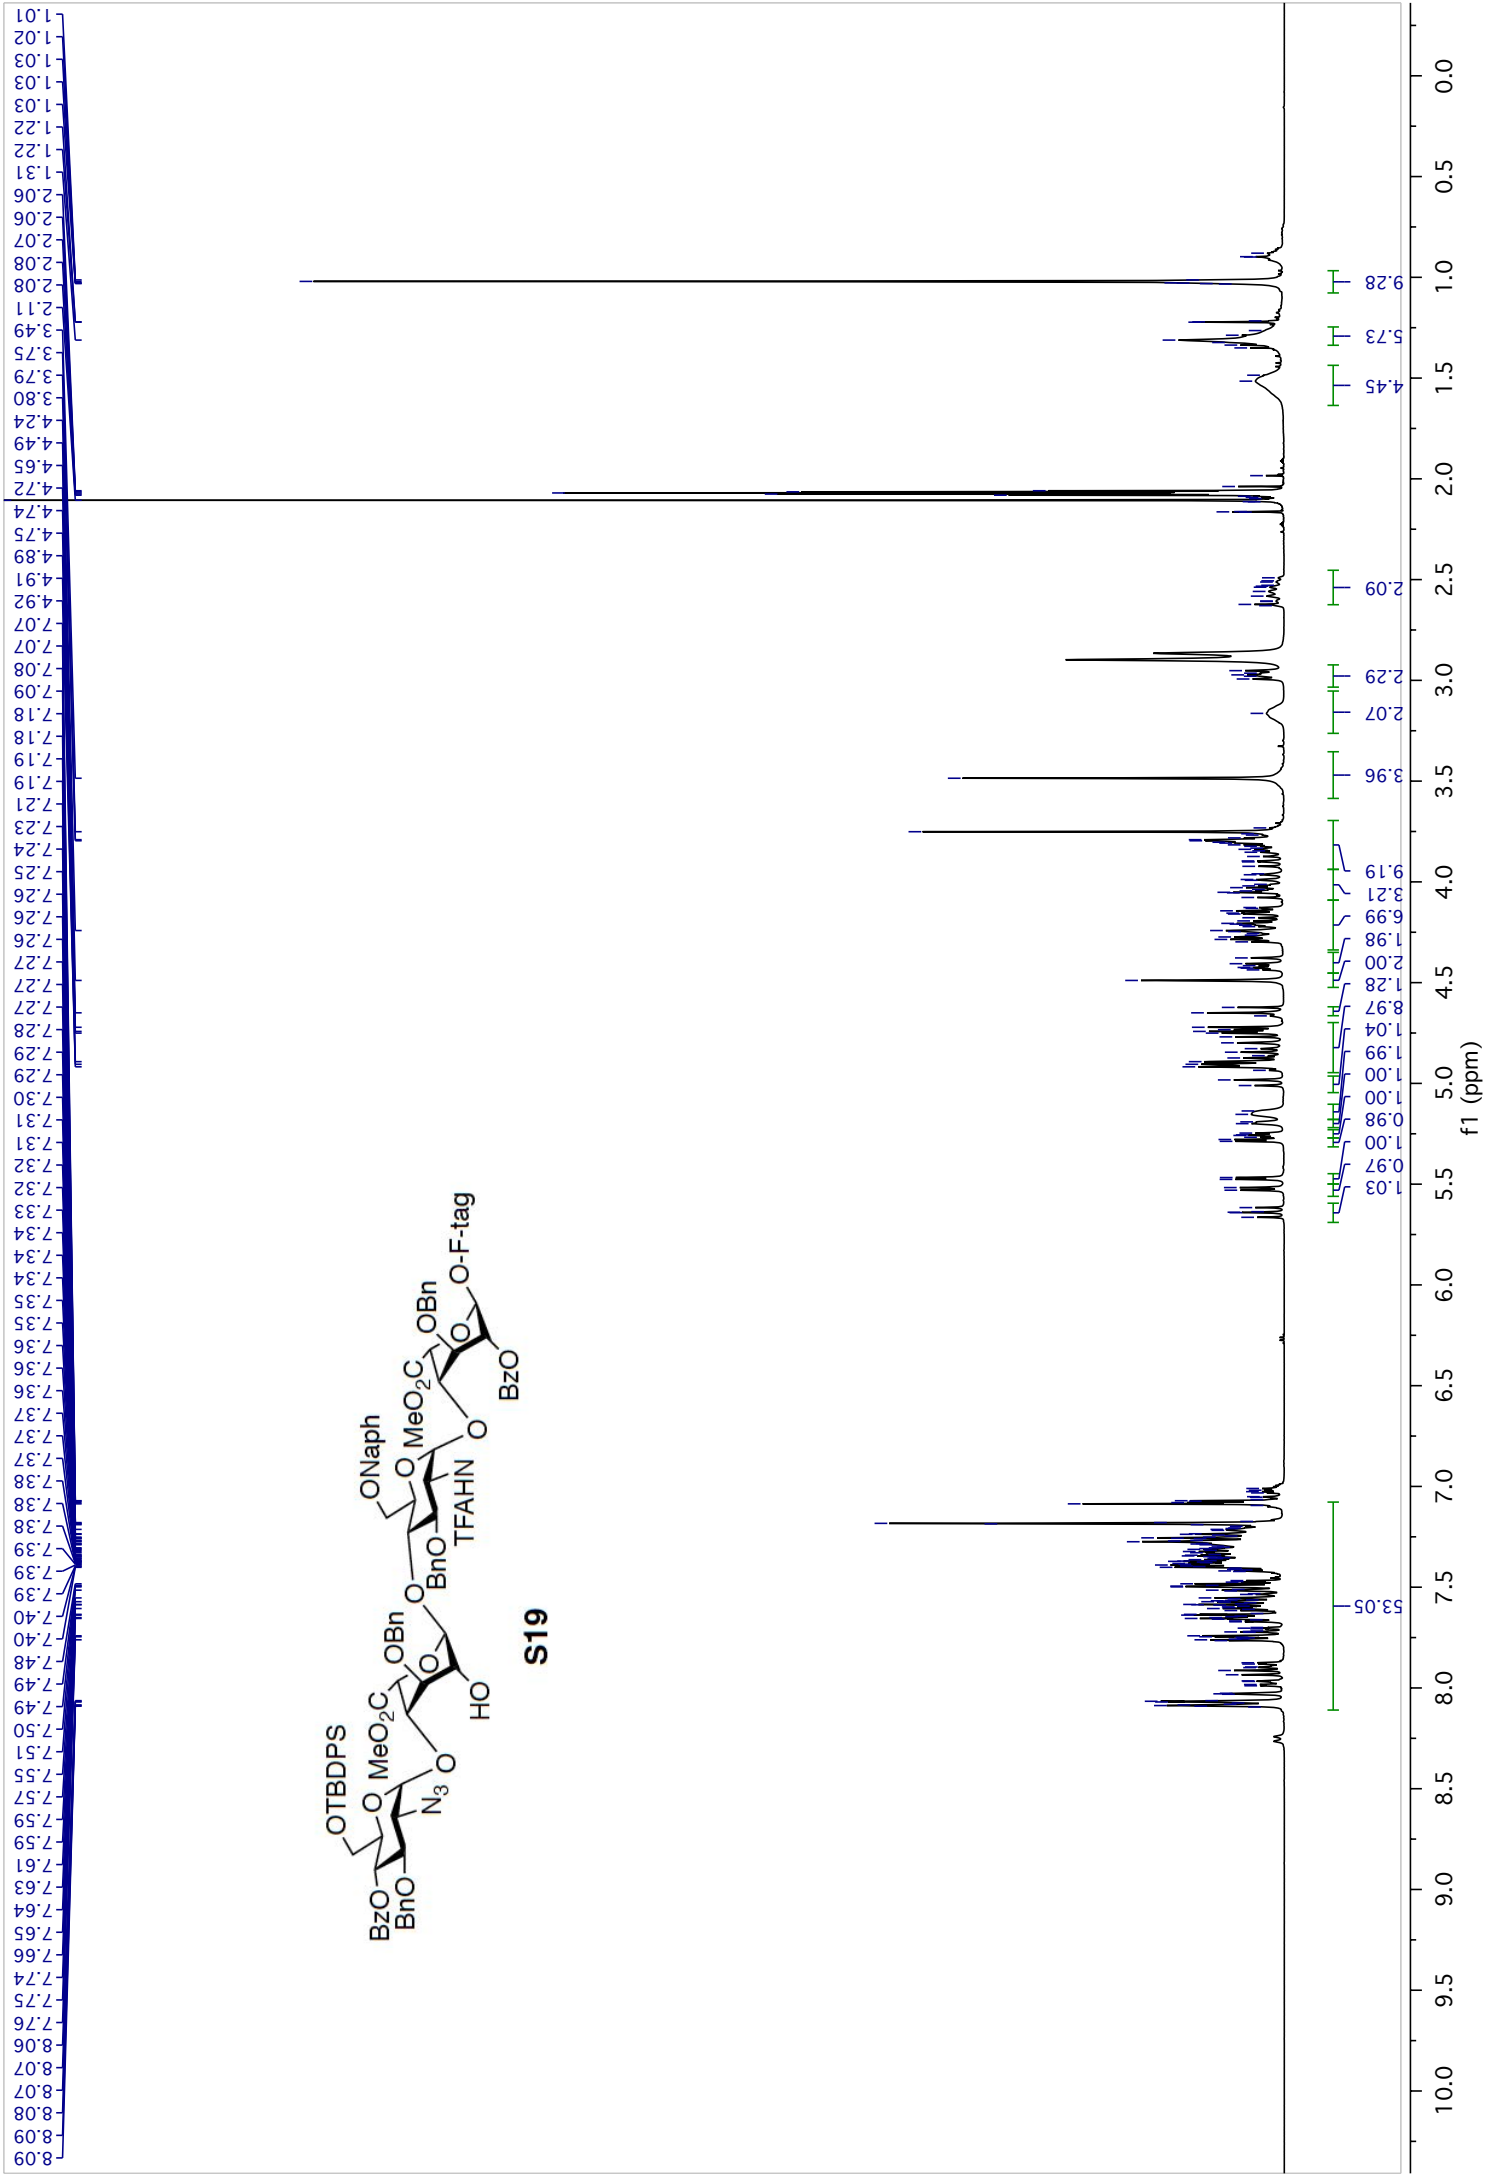

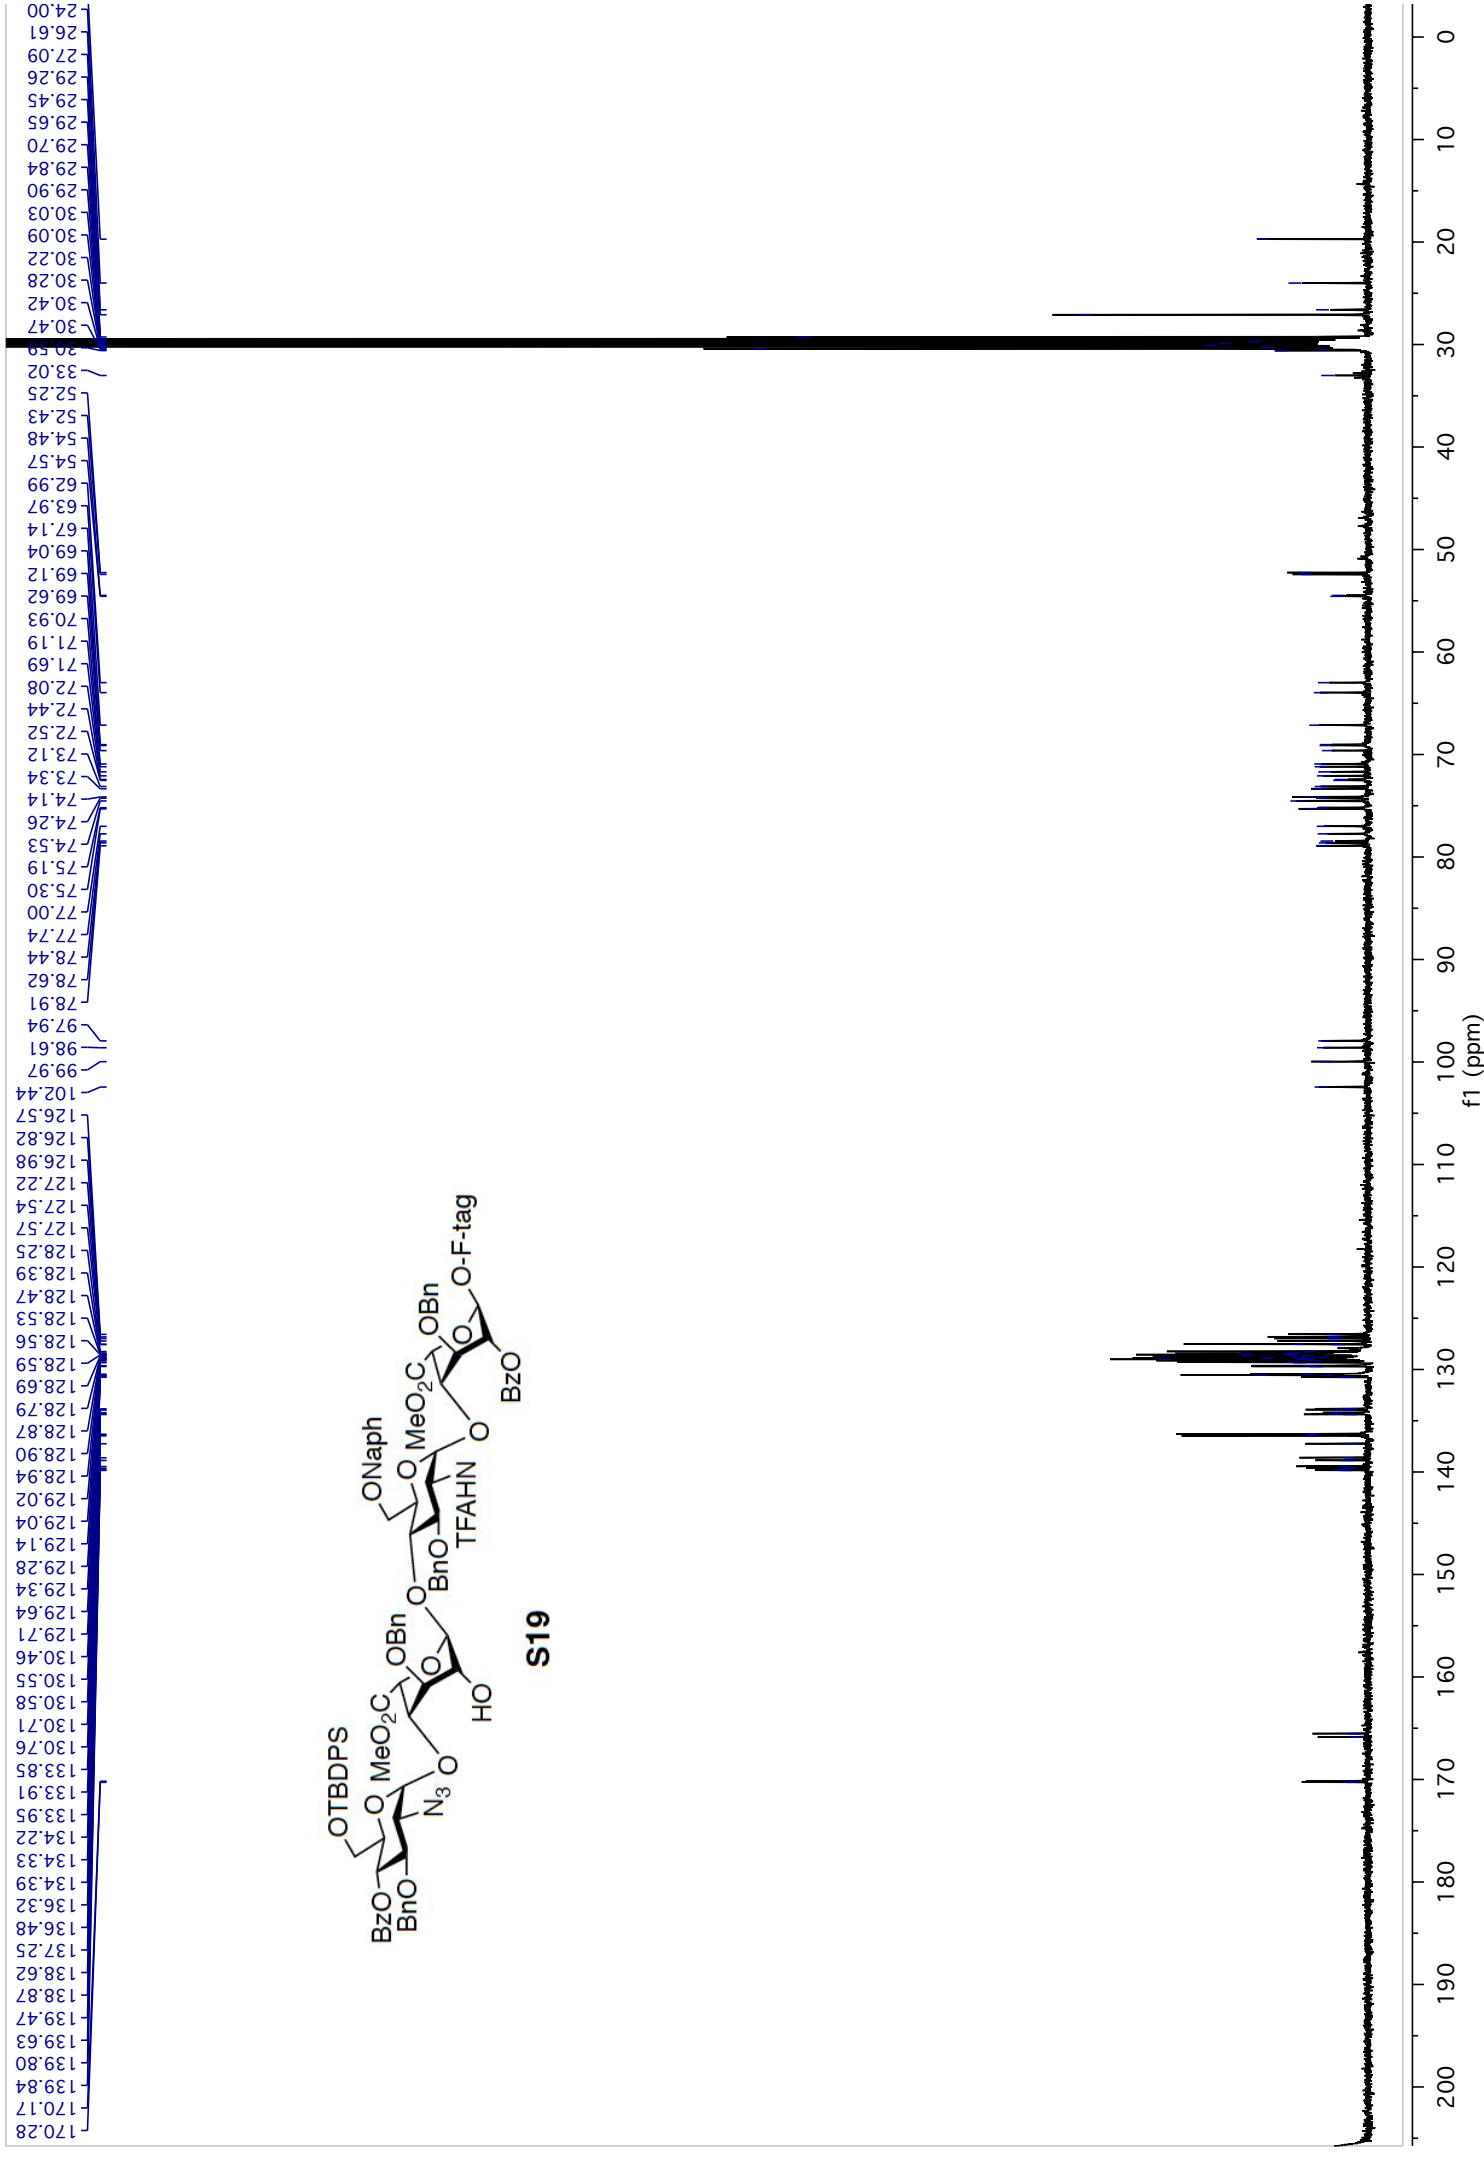

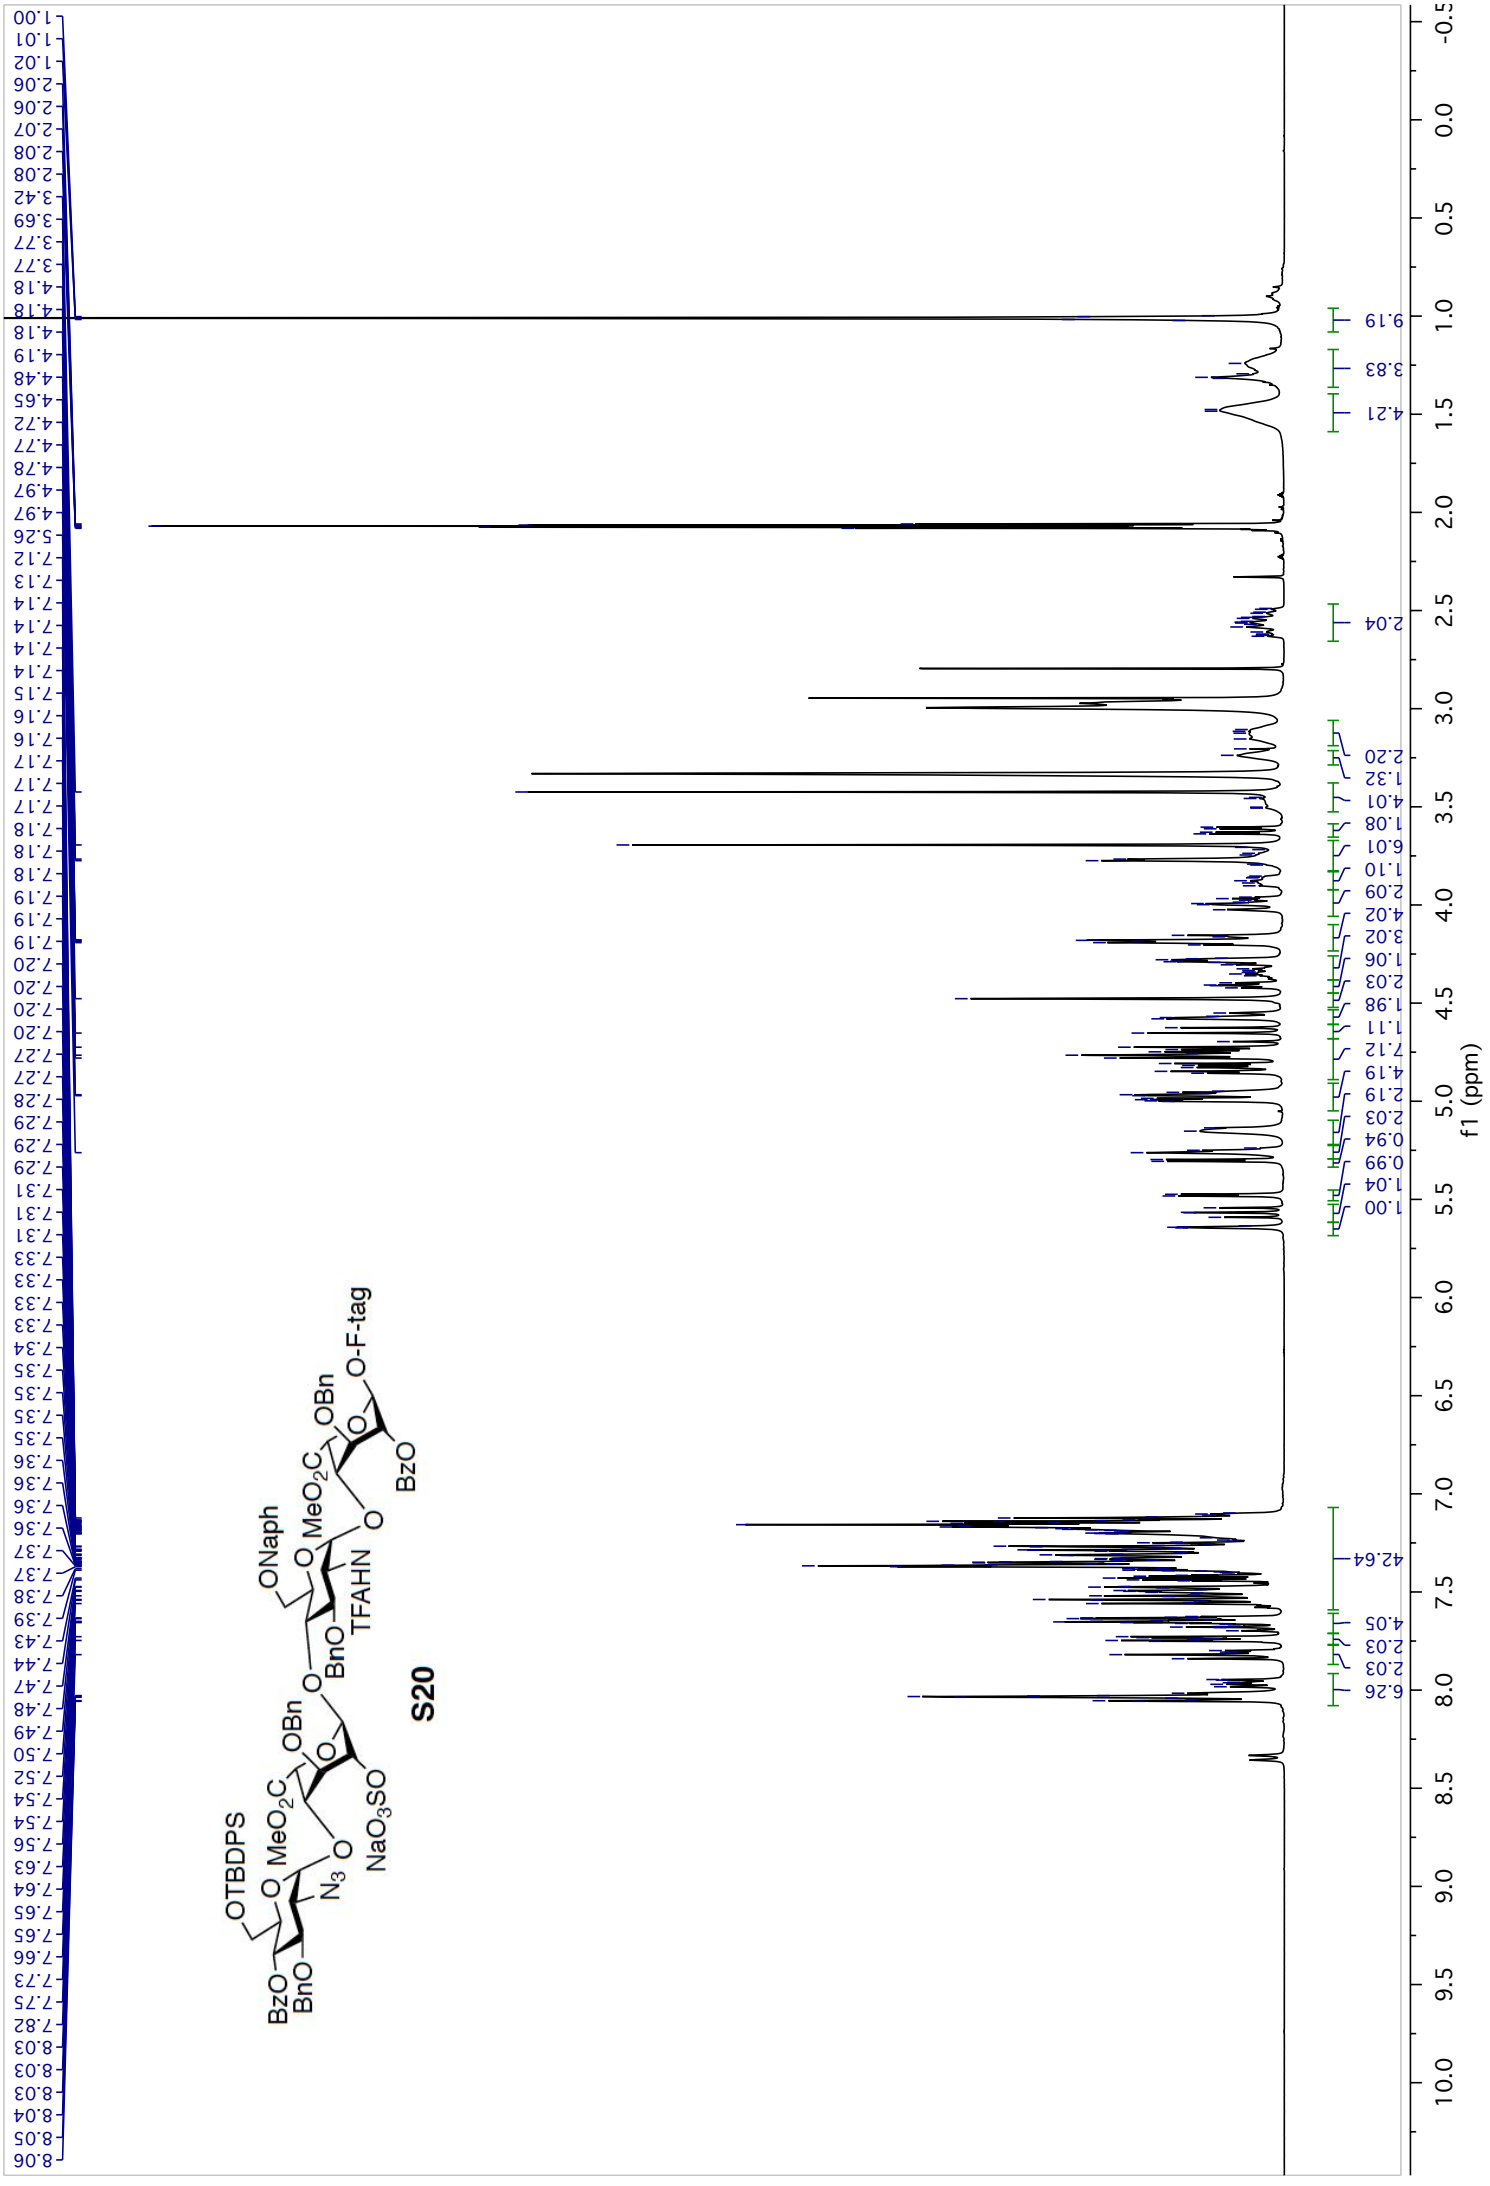

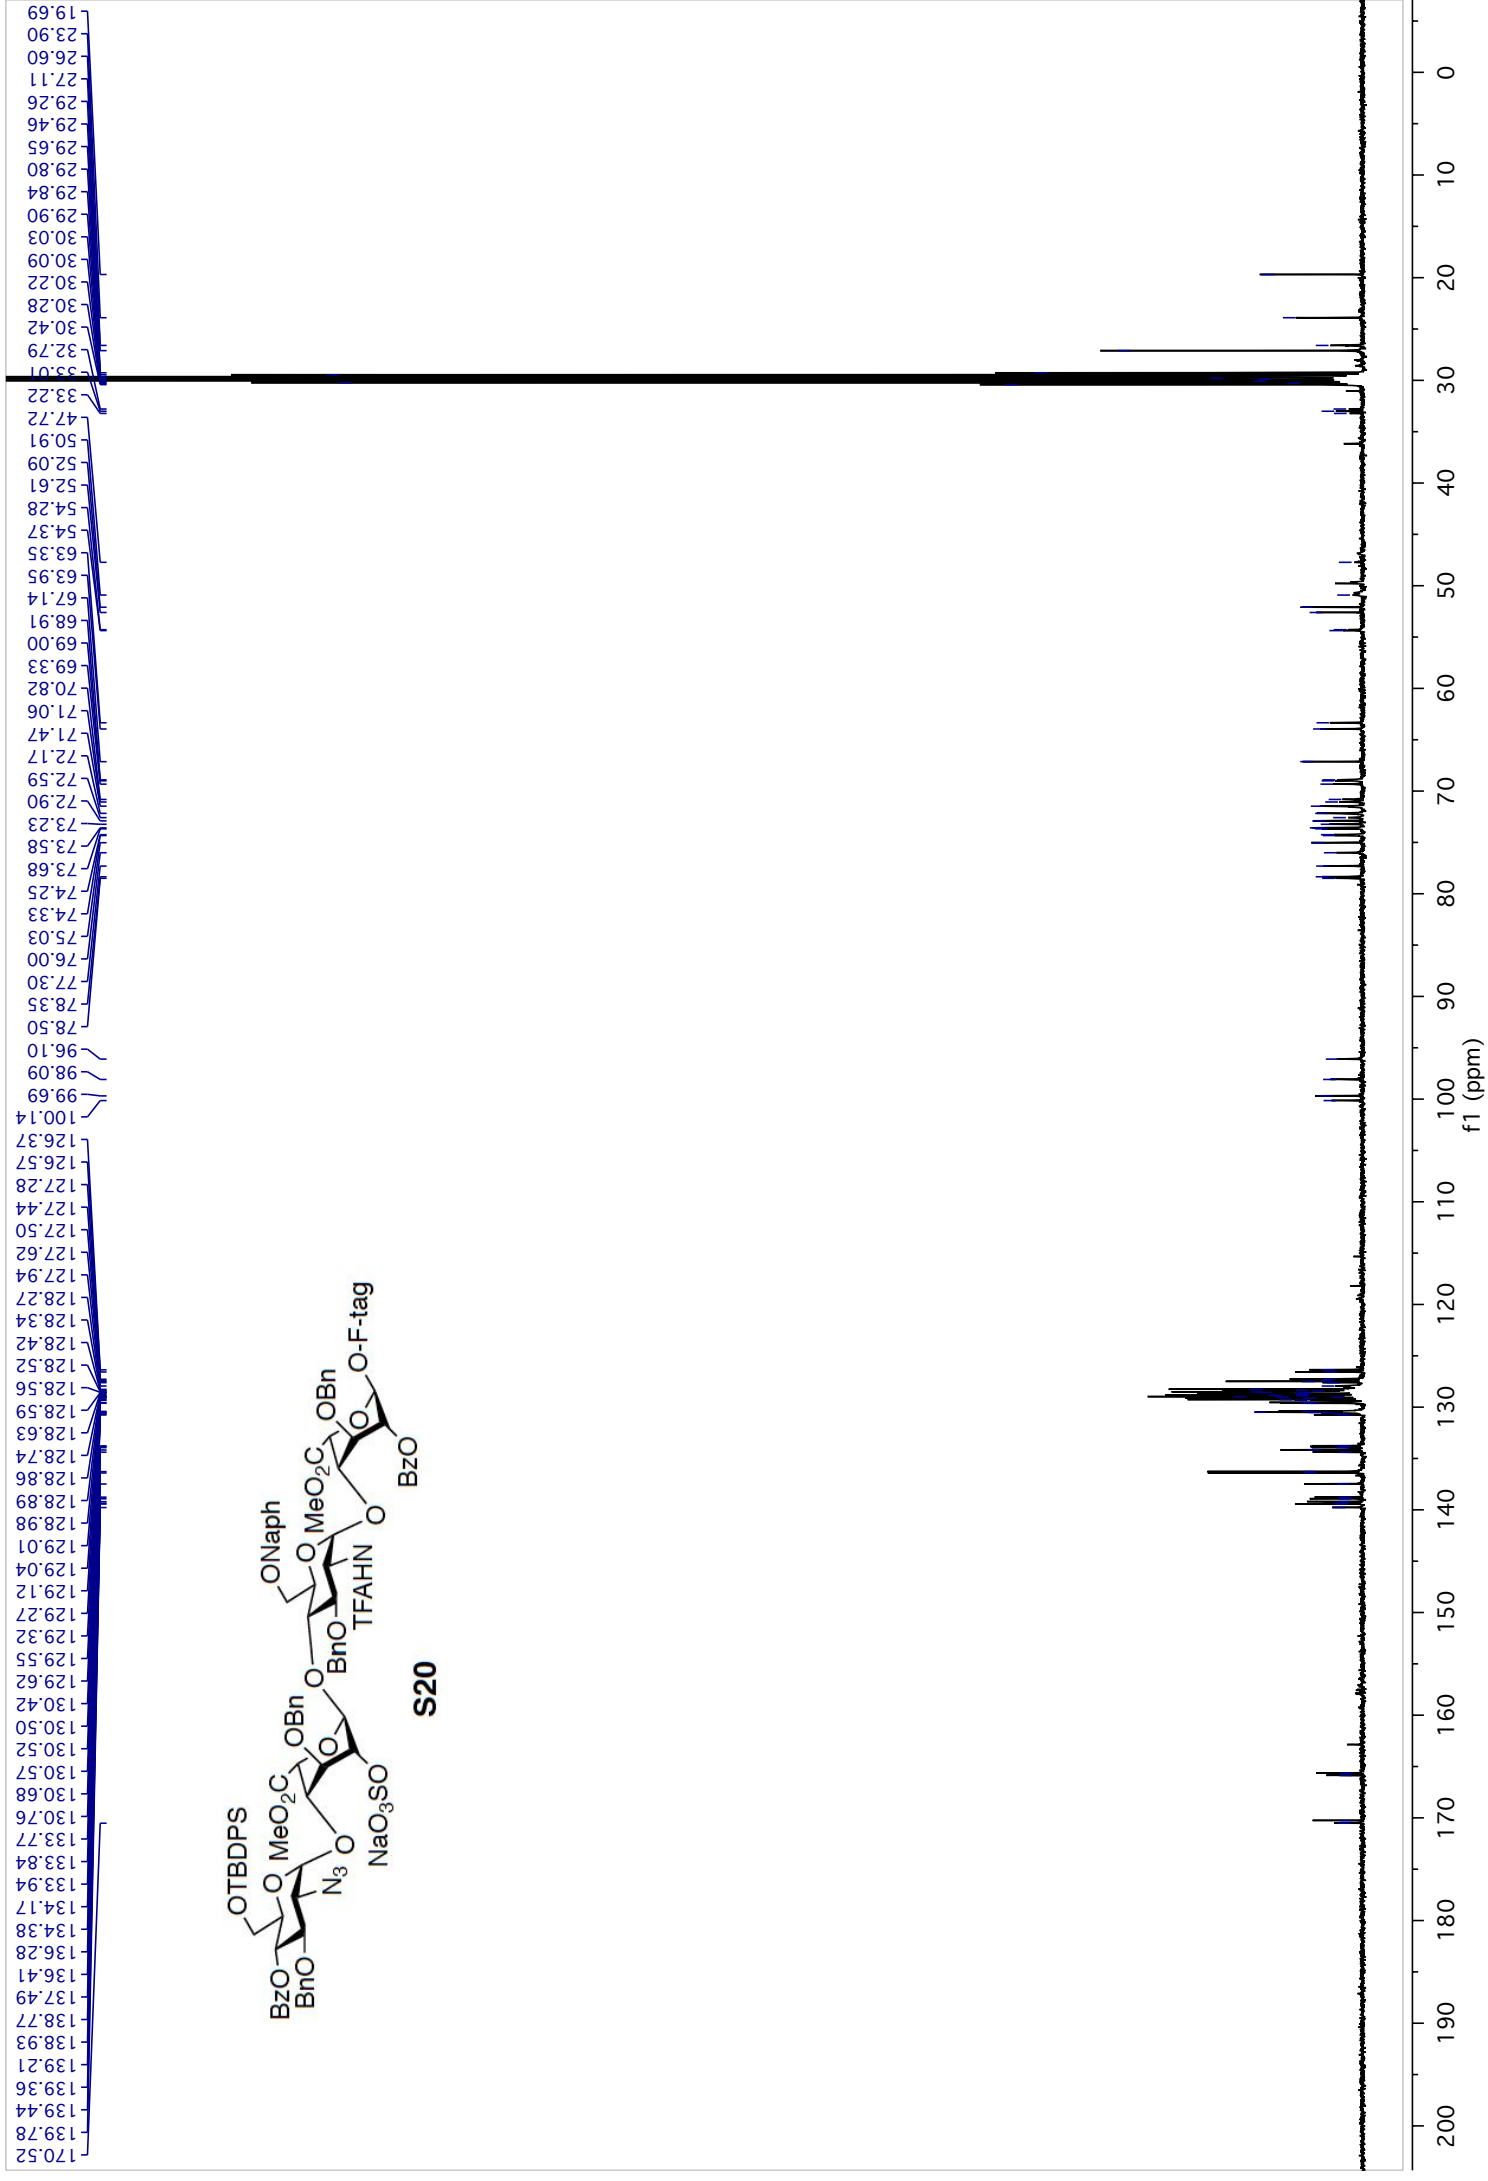

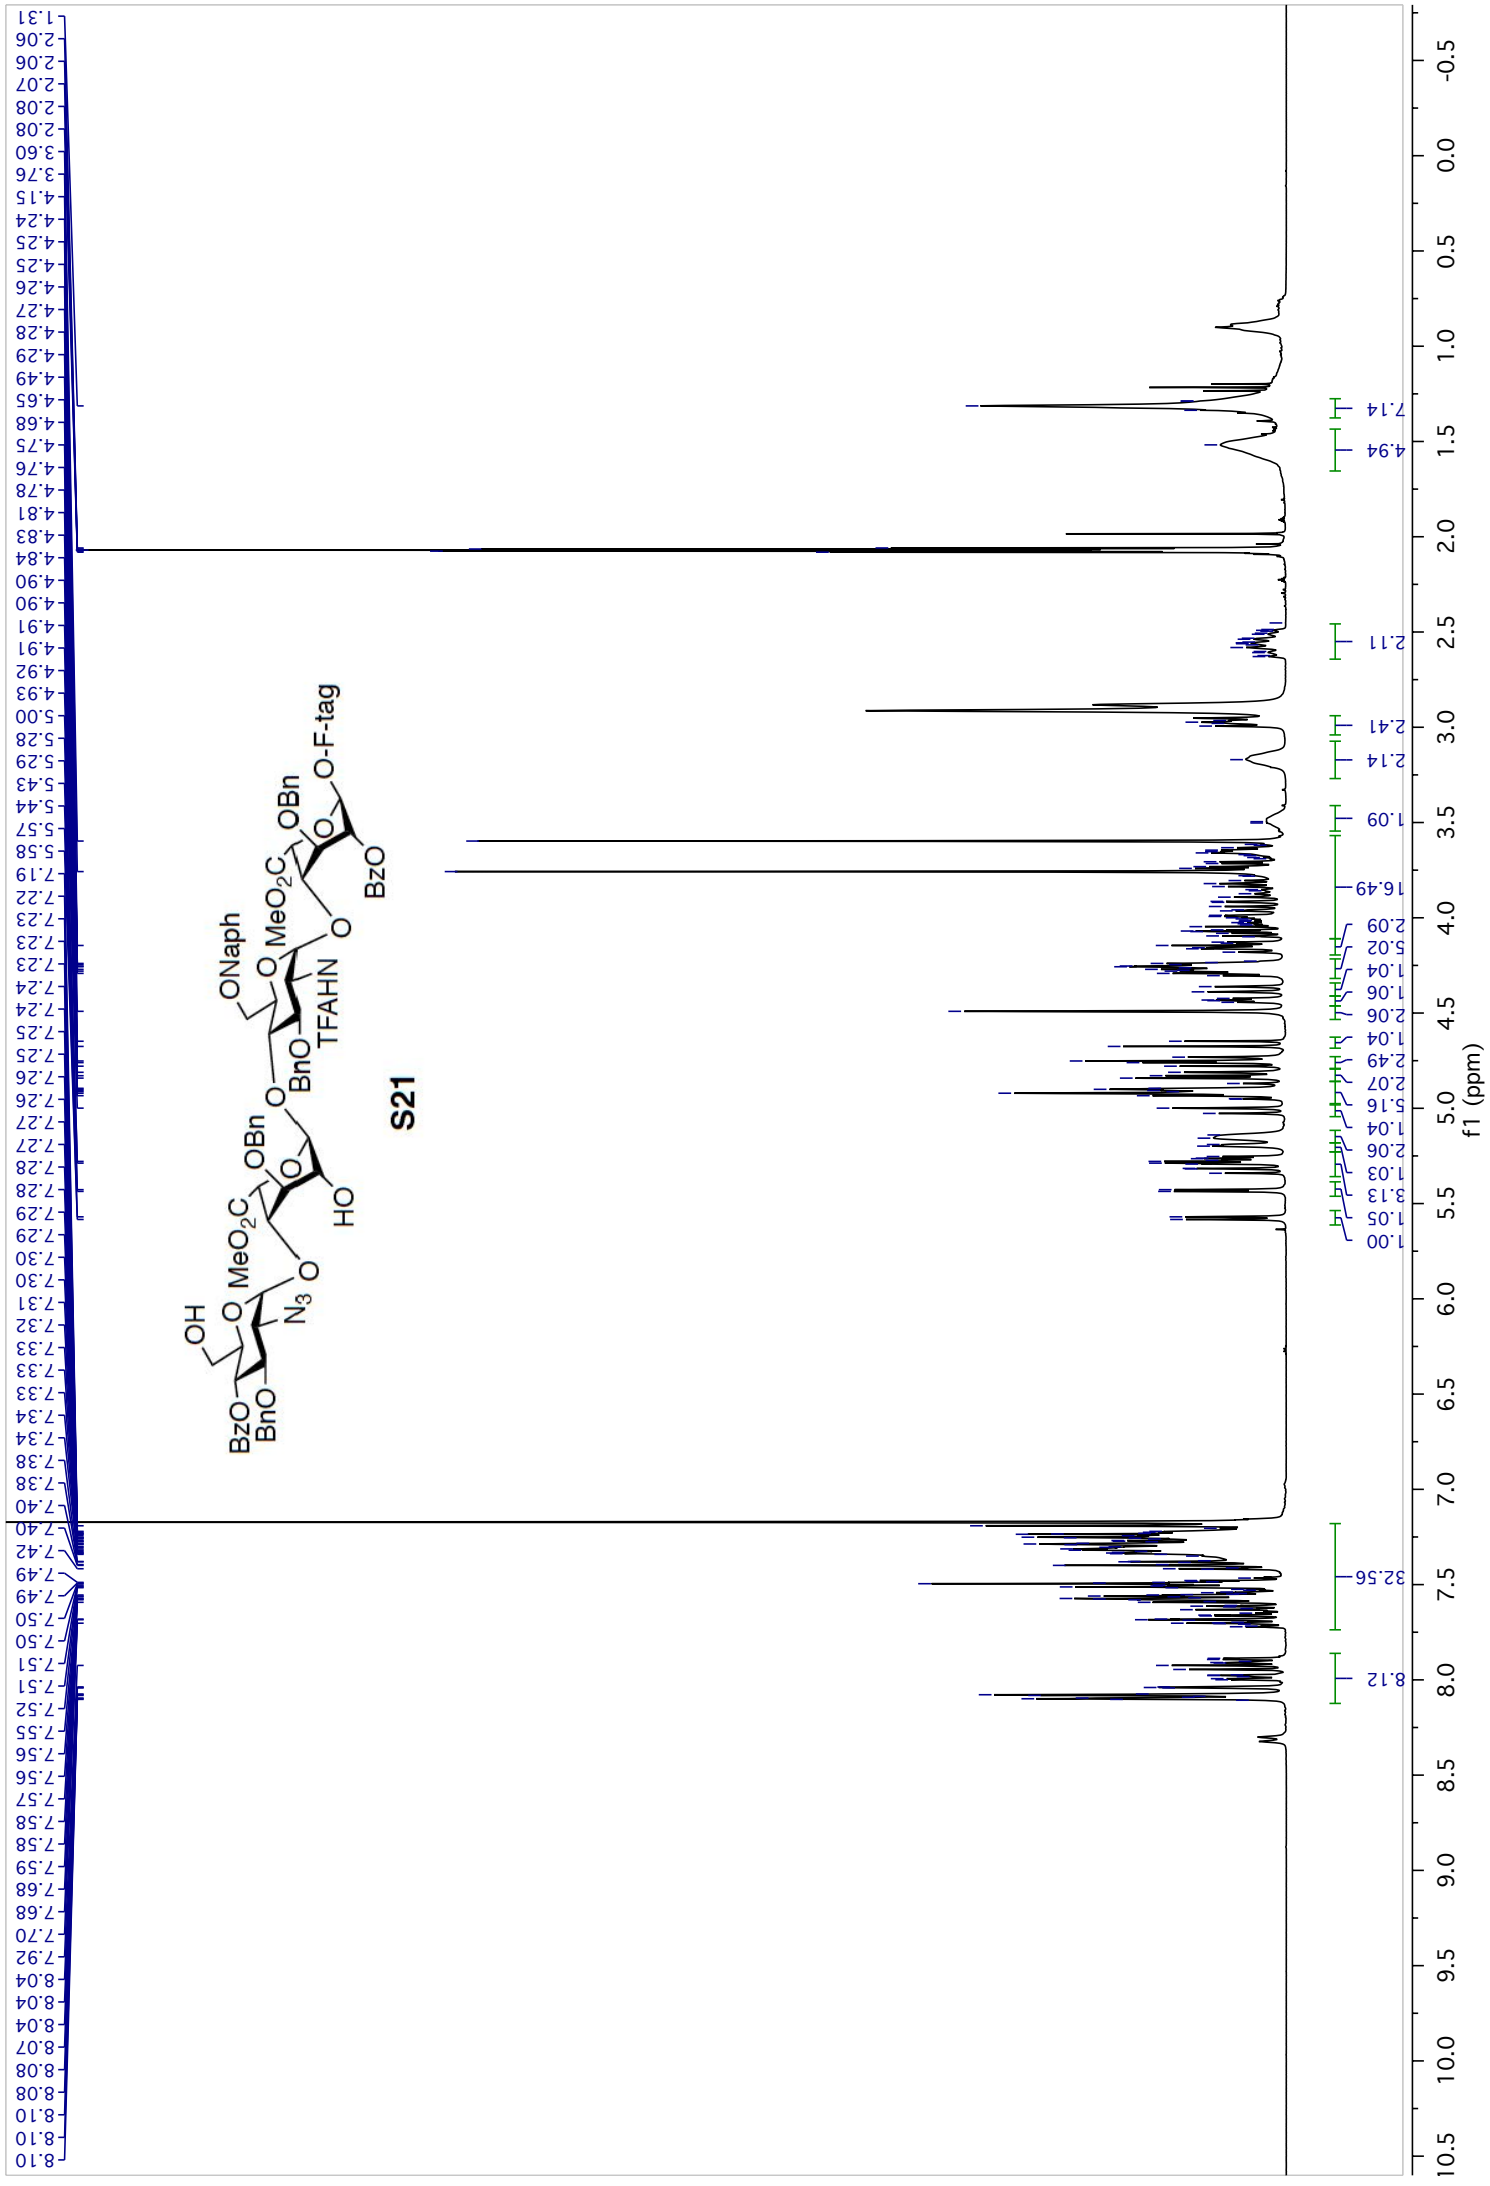

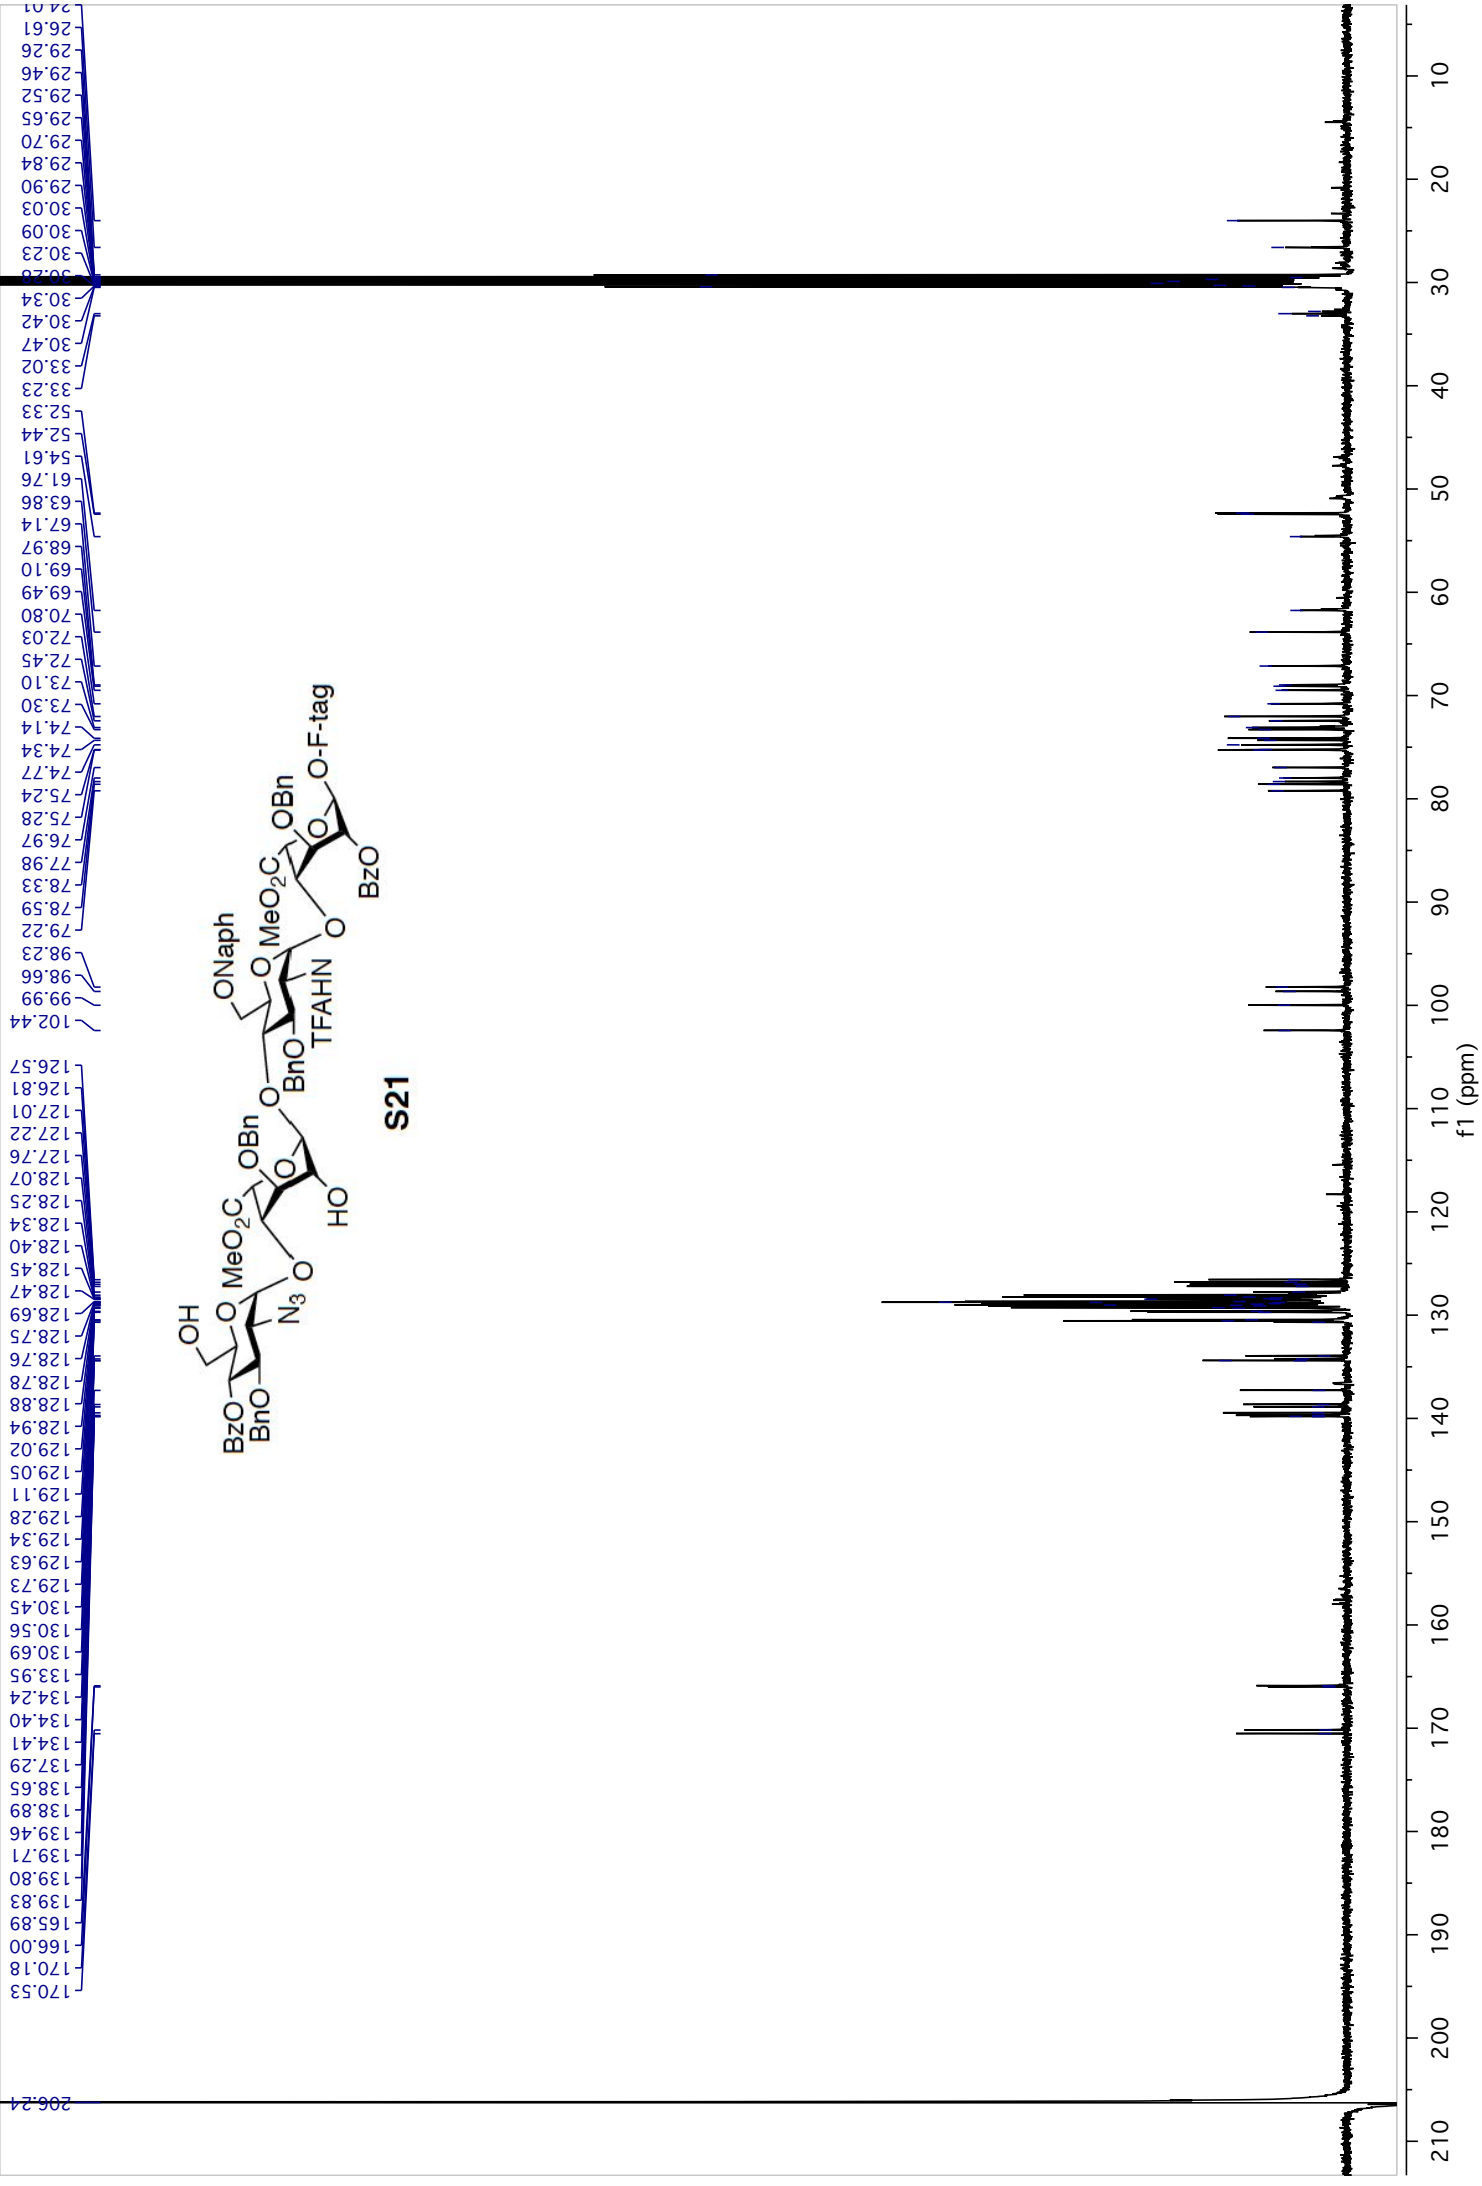



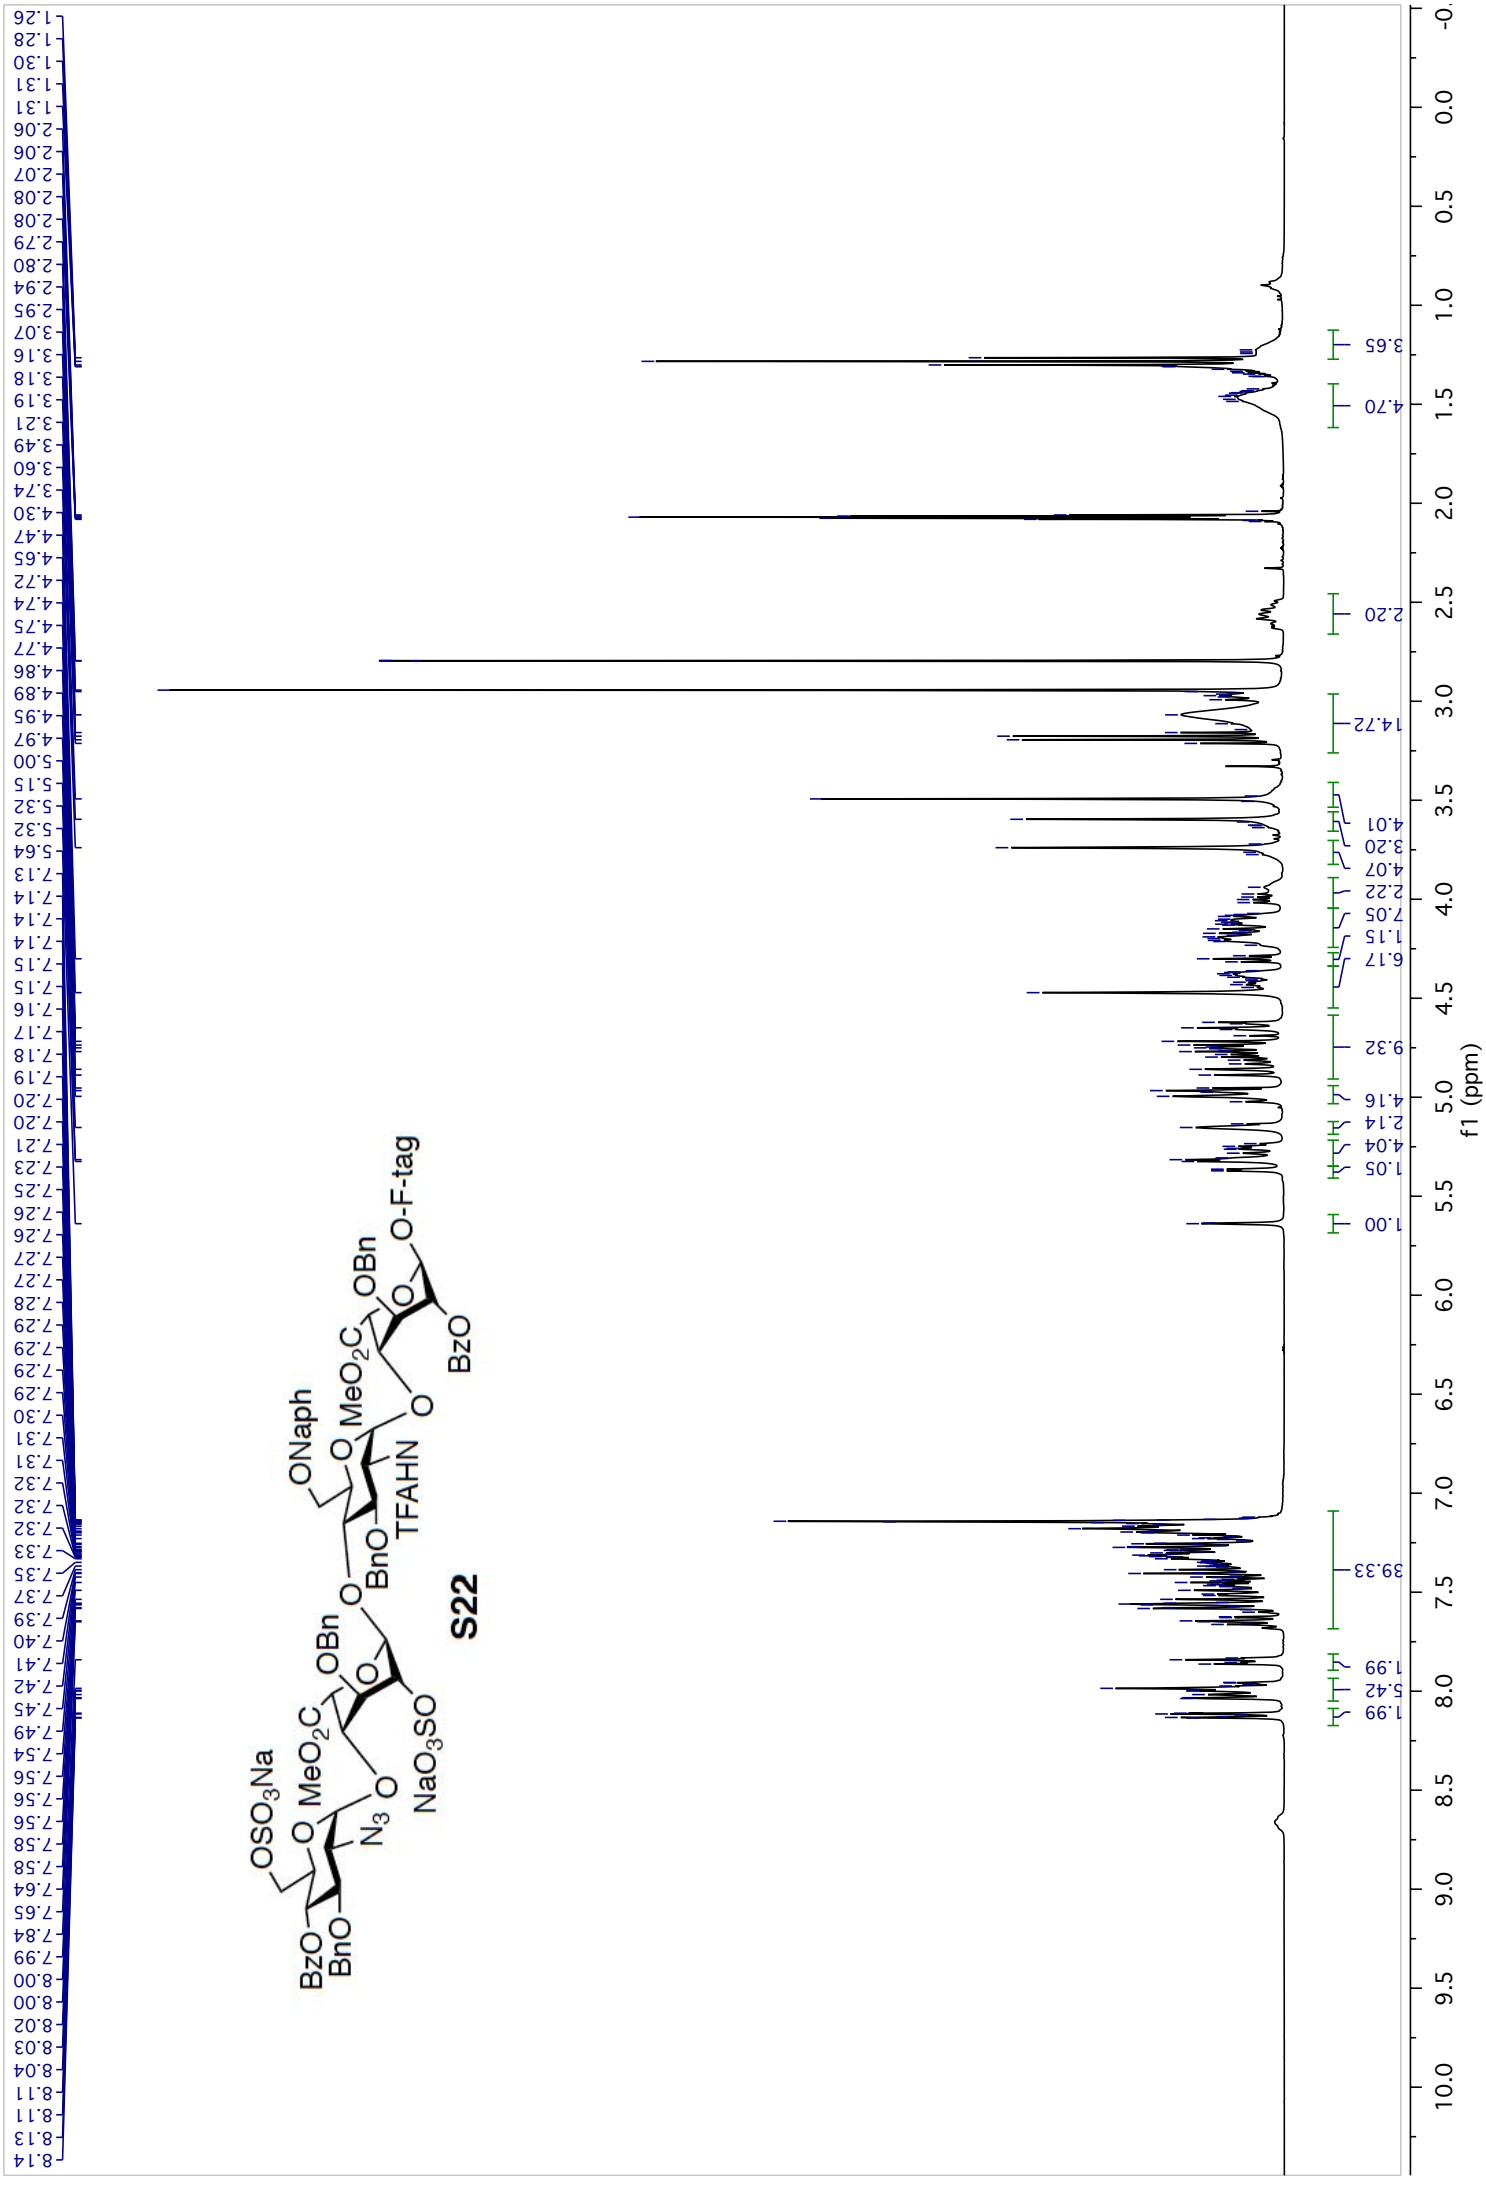

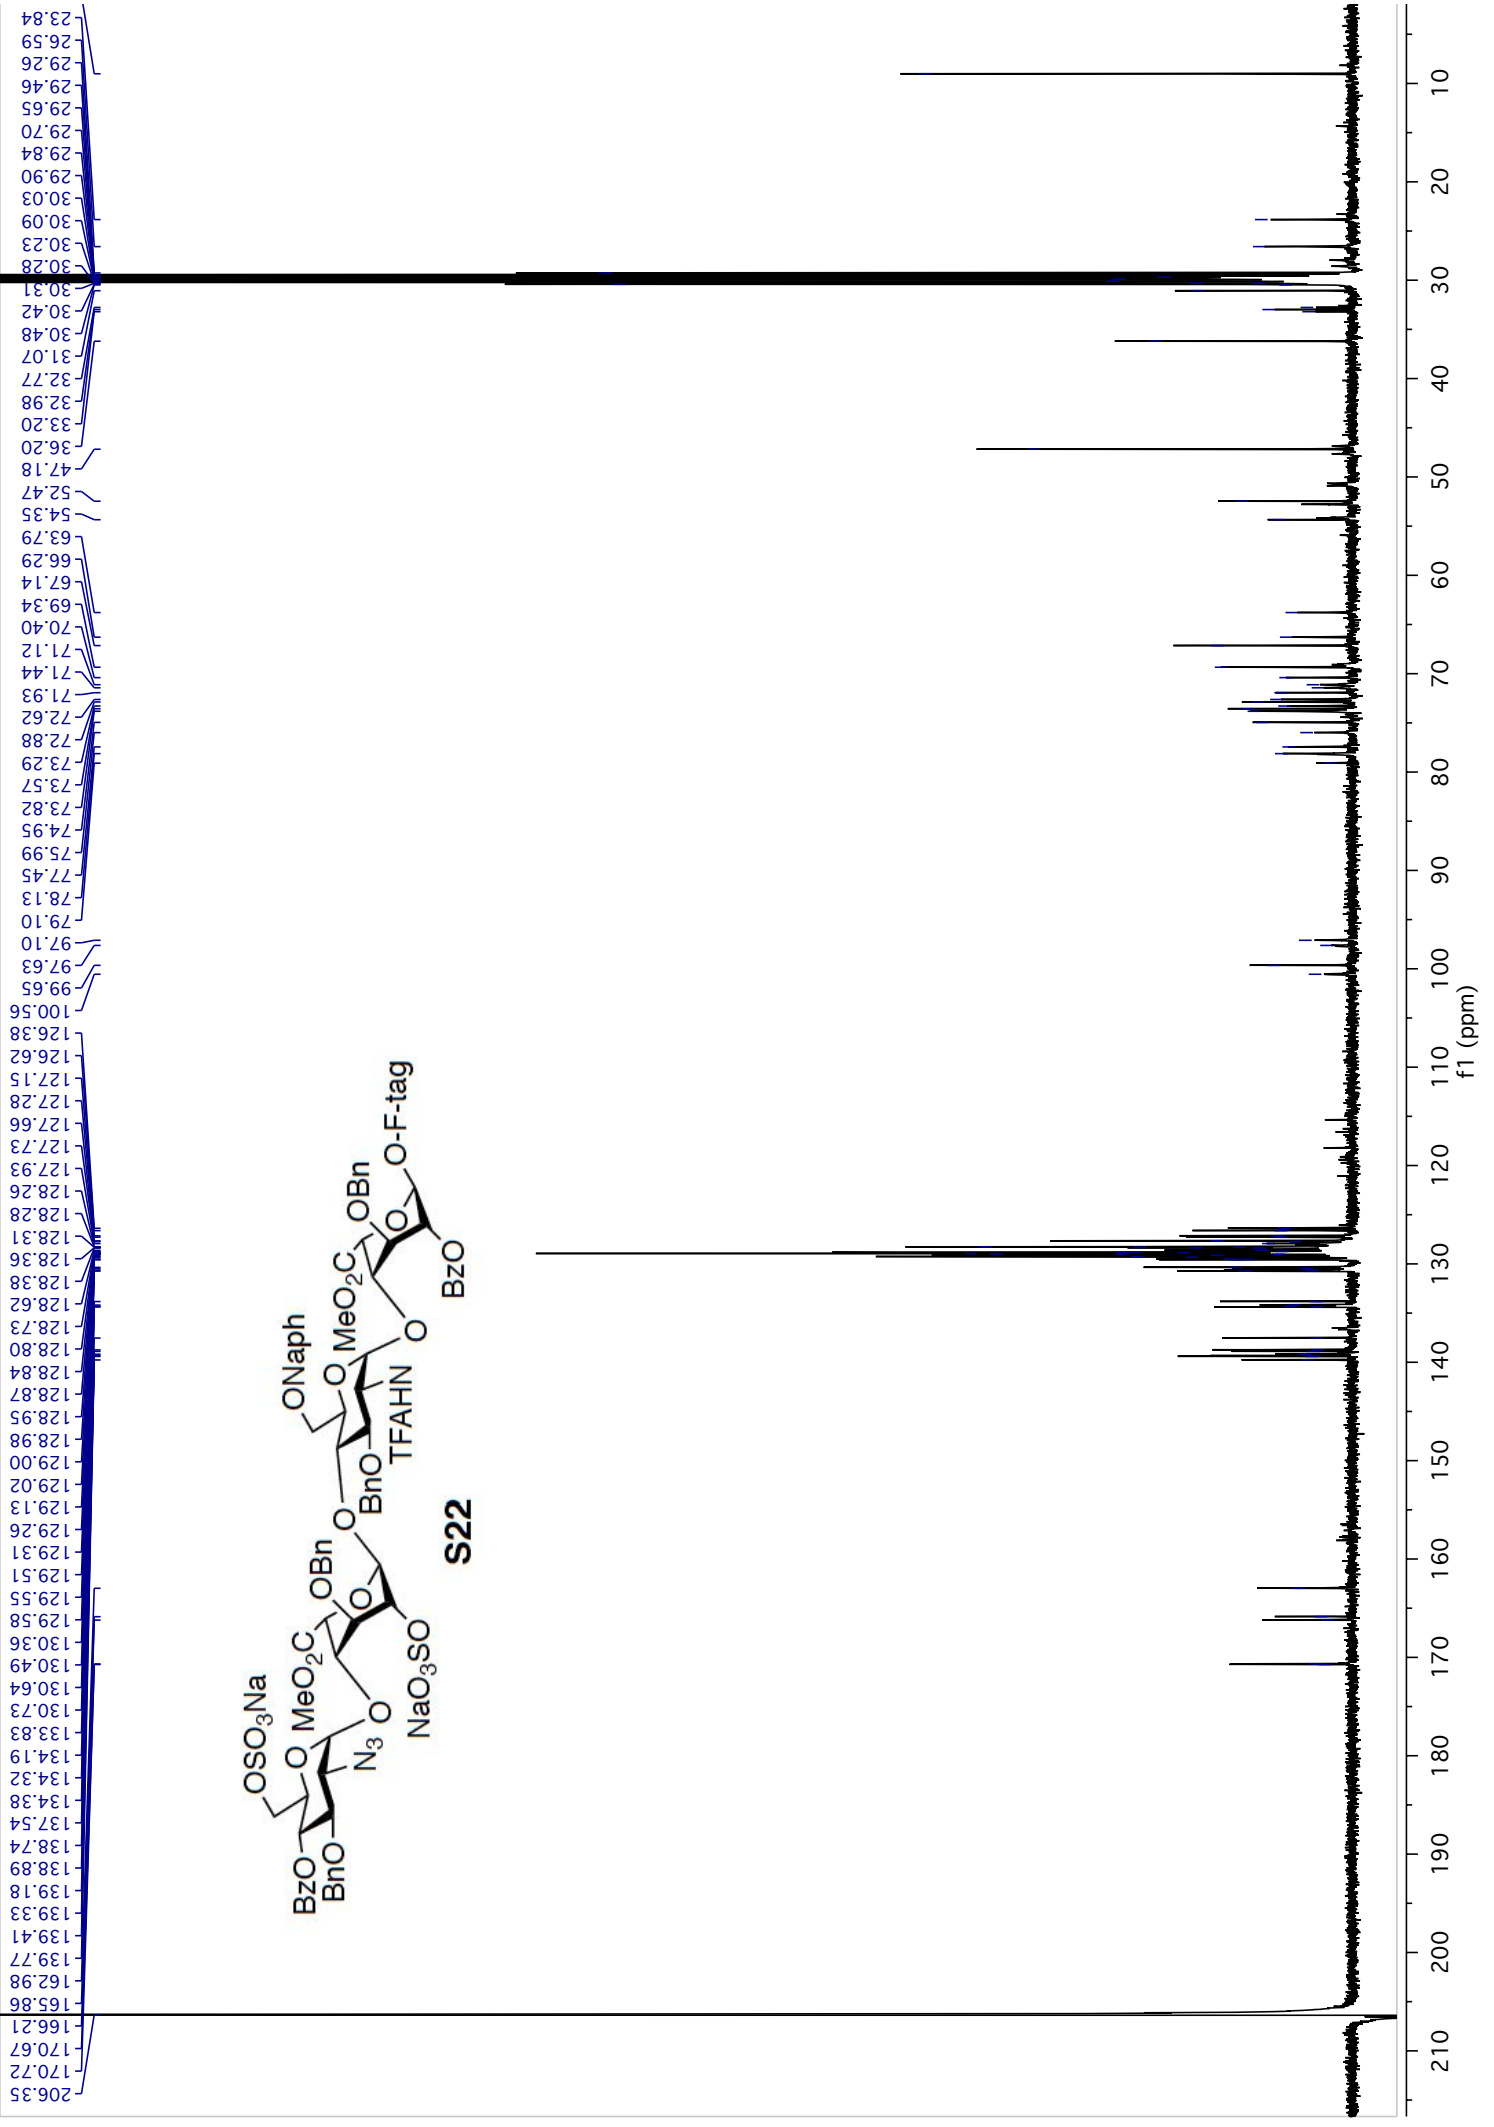

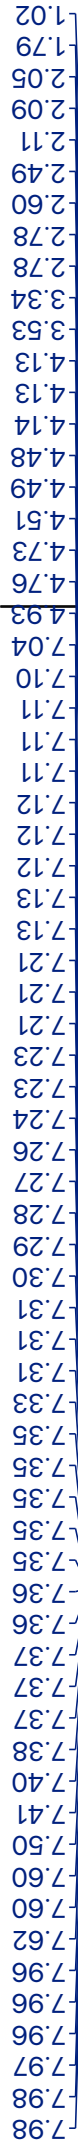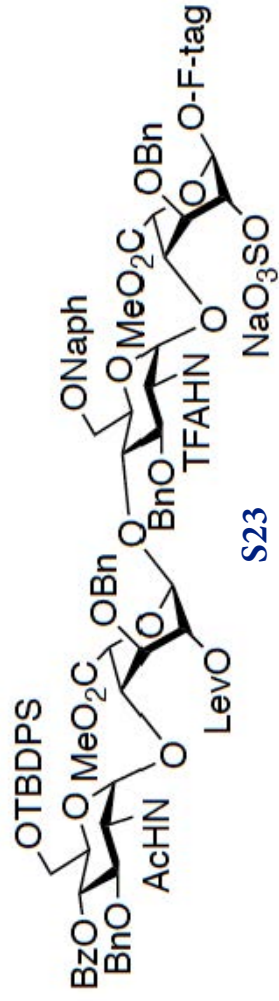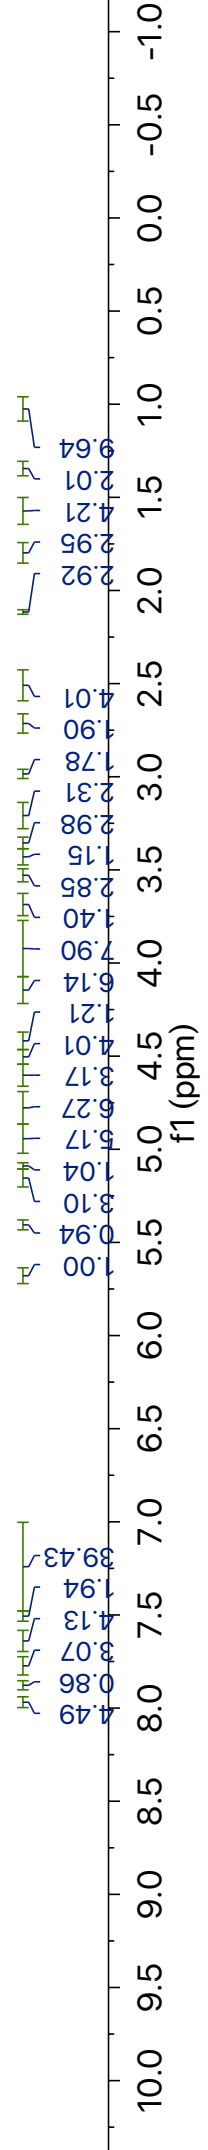

WL-2-123-prod.2.1.1r —

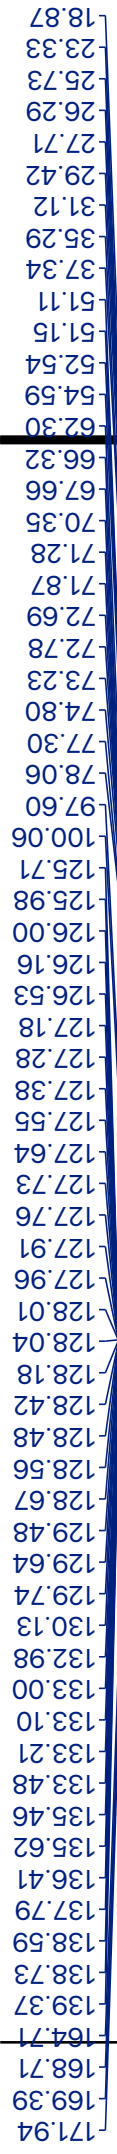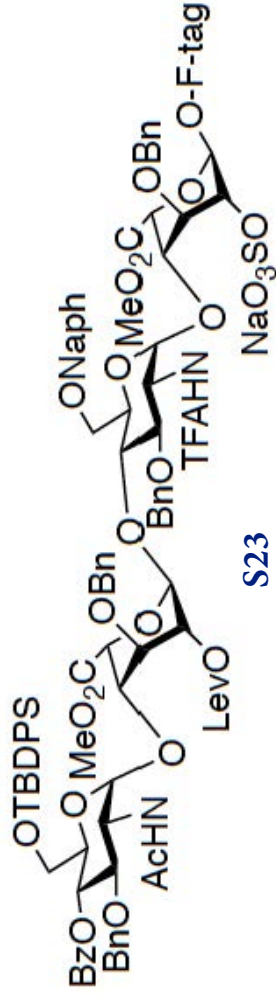

f1 (ppm)

210 200 190 180 170 160 150 140 130 120 110 100 90 80 70 60 50 40 30 20 10 0 -10



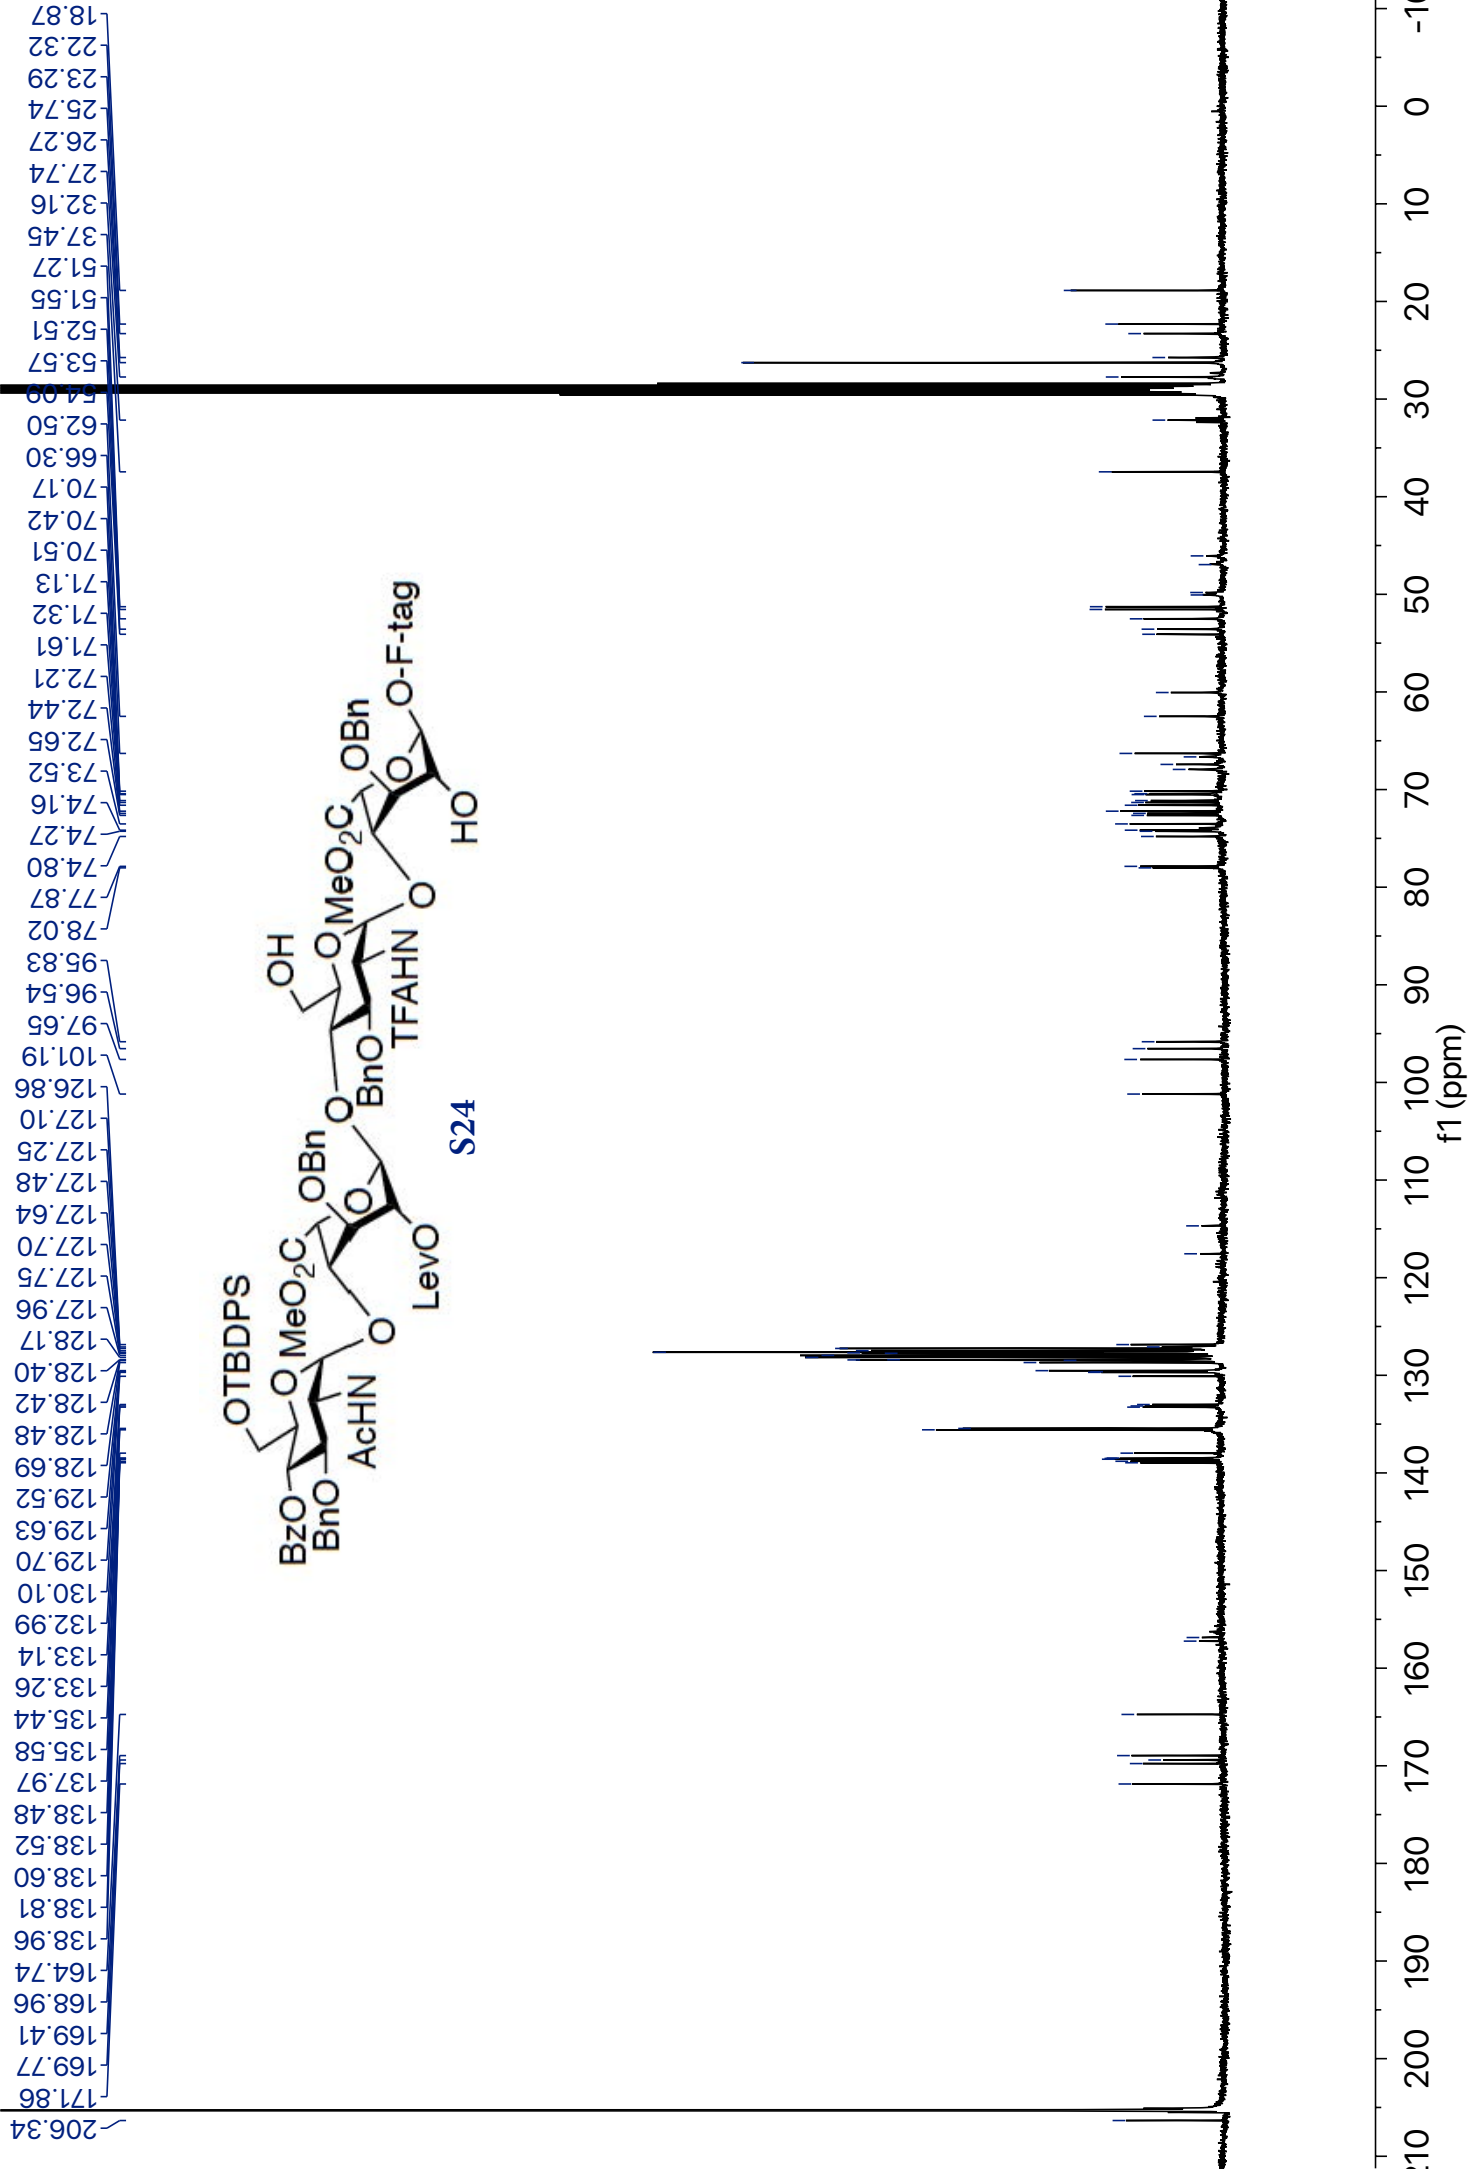

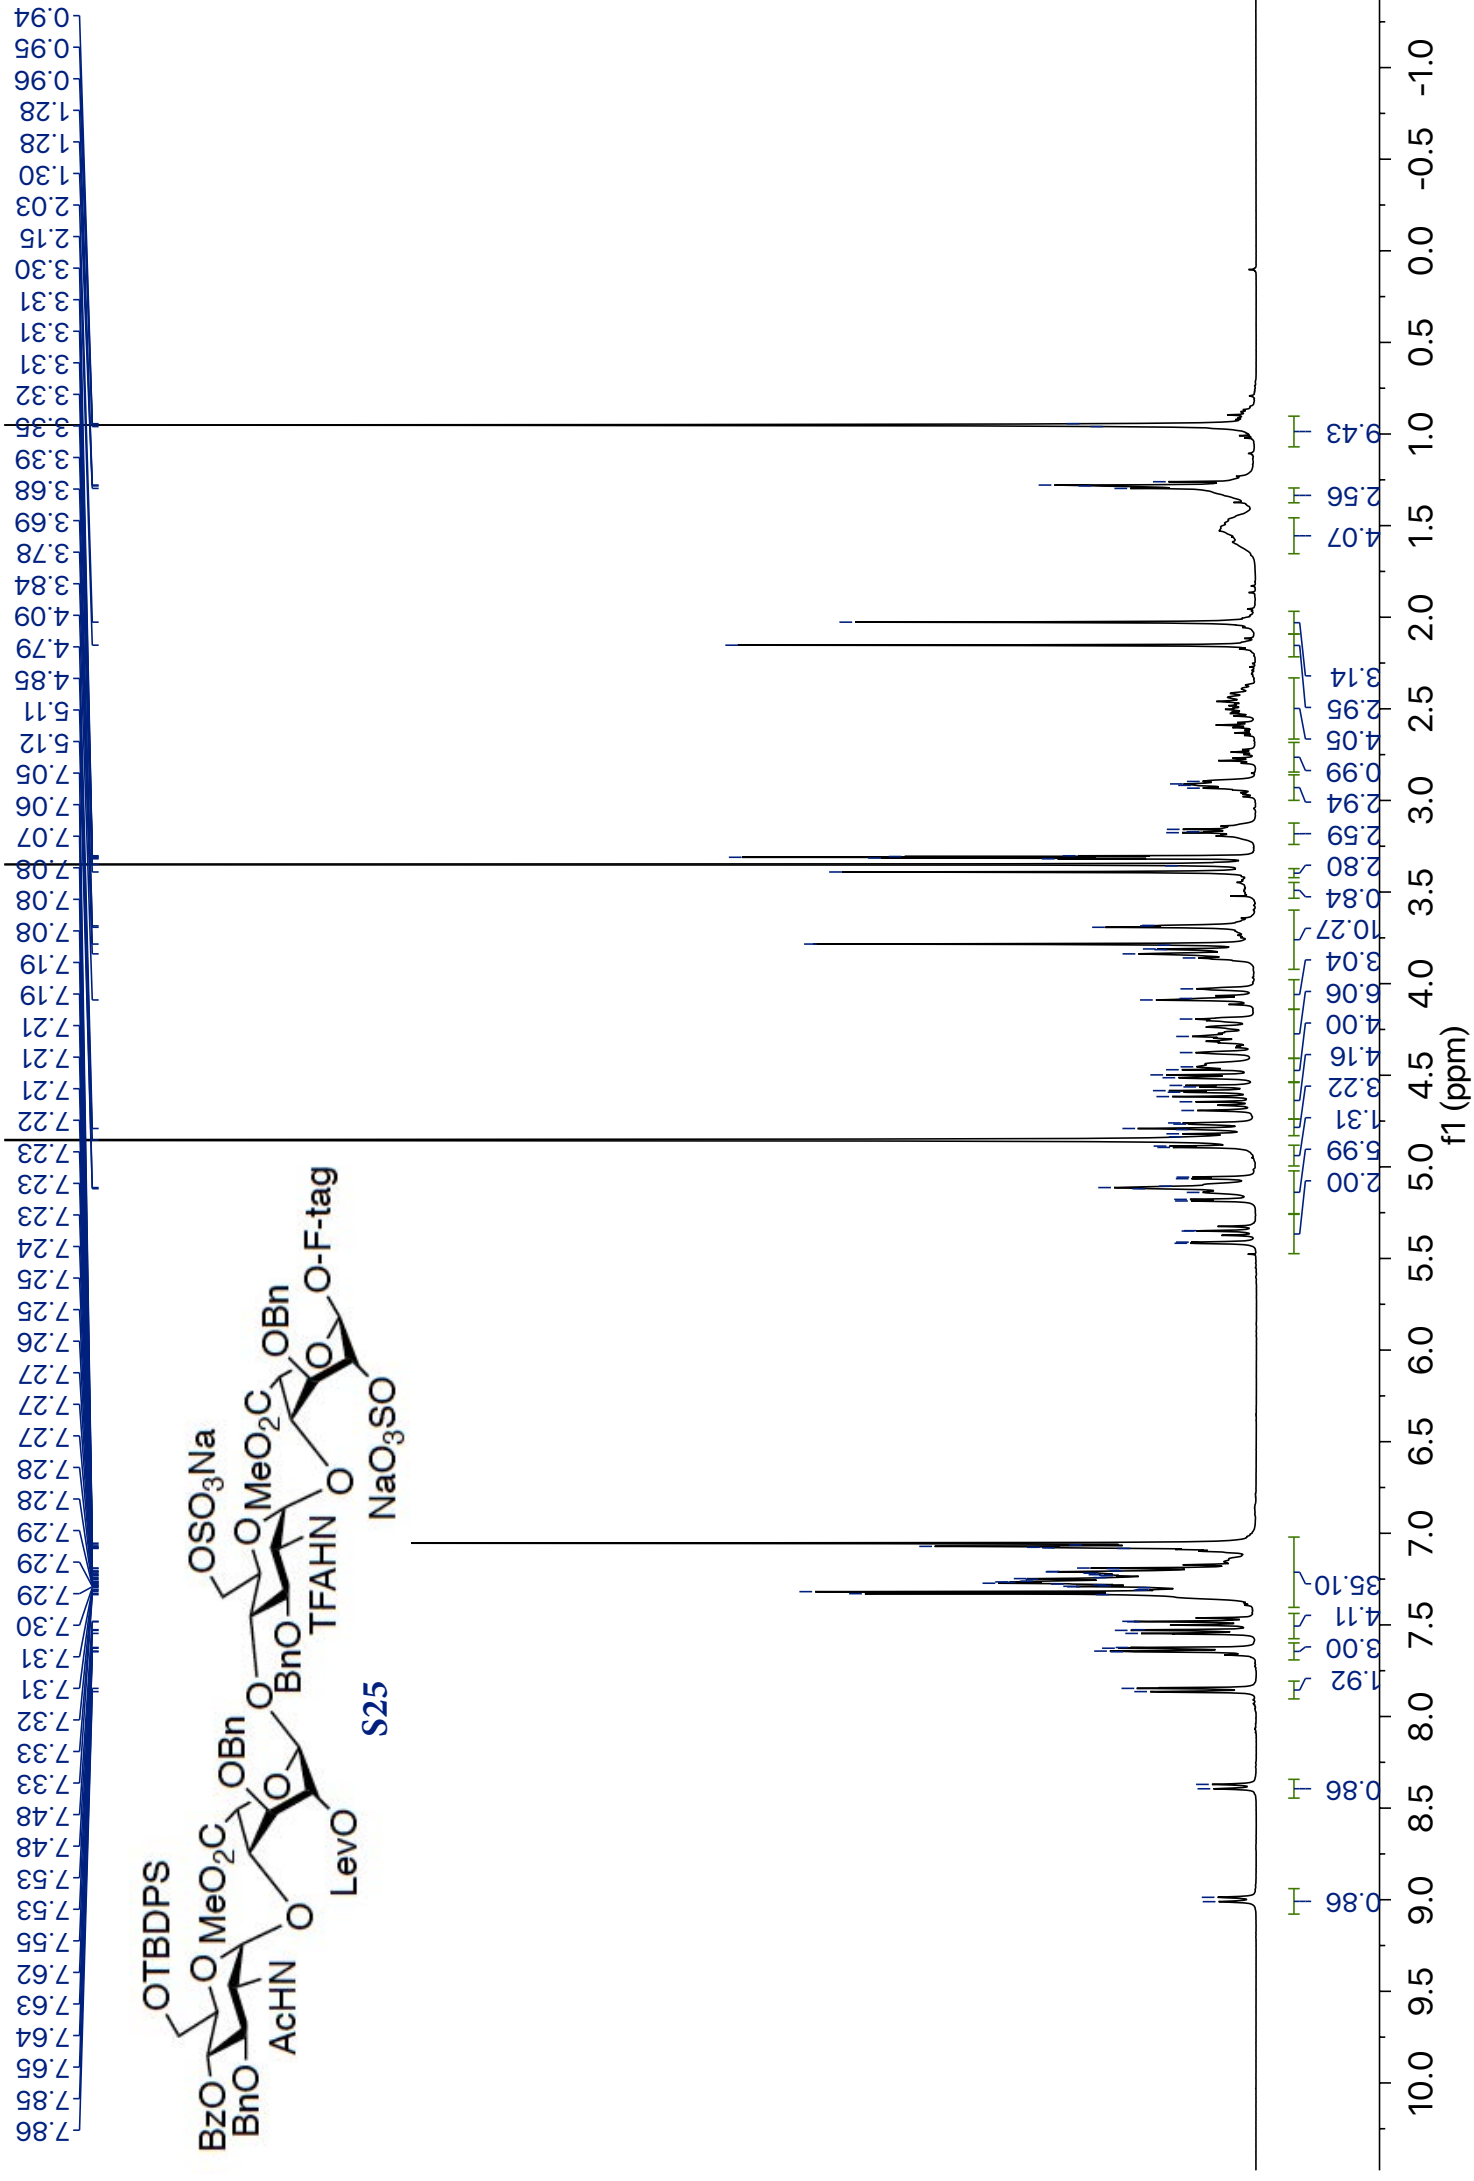

WL-2-253-run2-D-NAc-B6-A2-Di-O-sulfation-C.2.1.1r

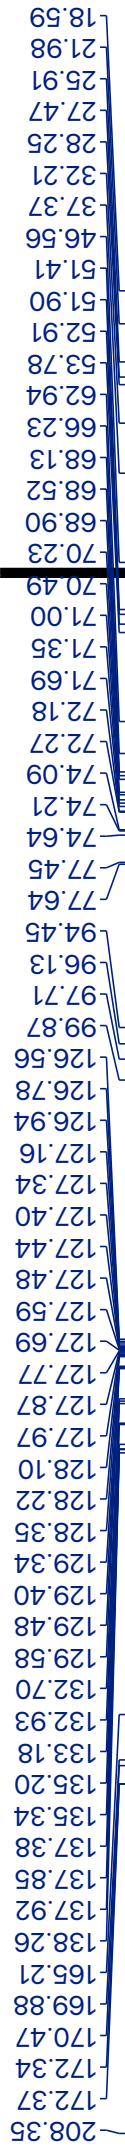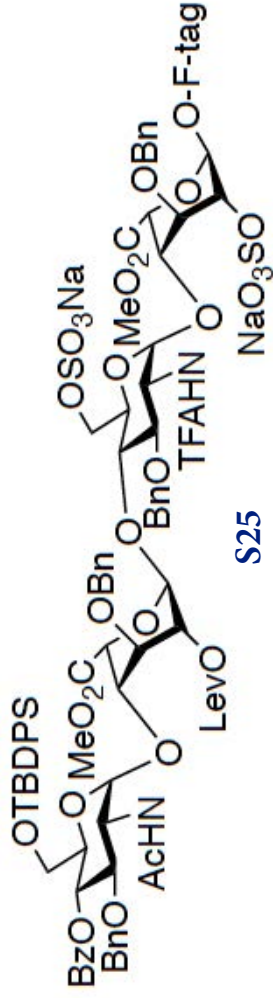

f1 (ppm)



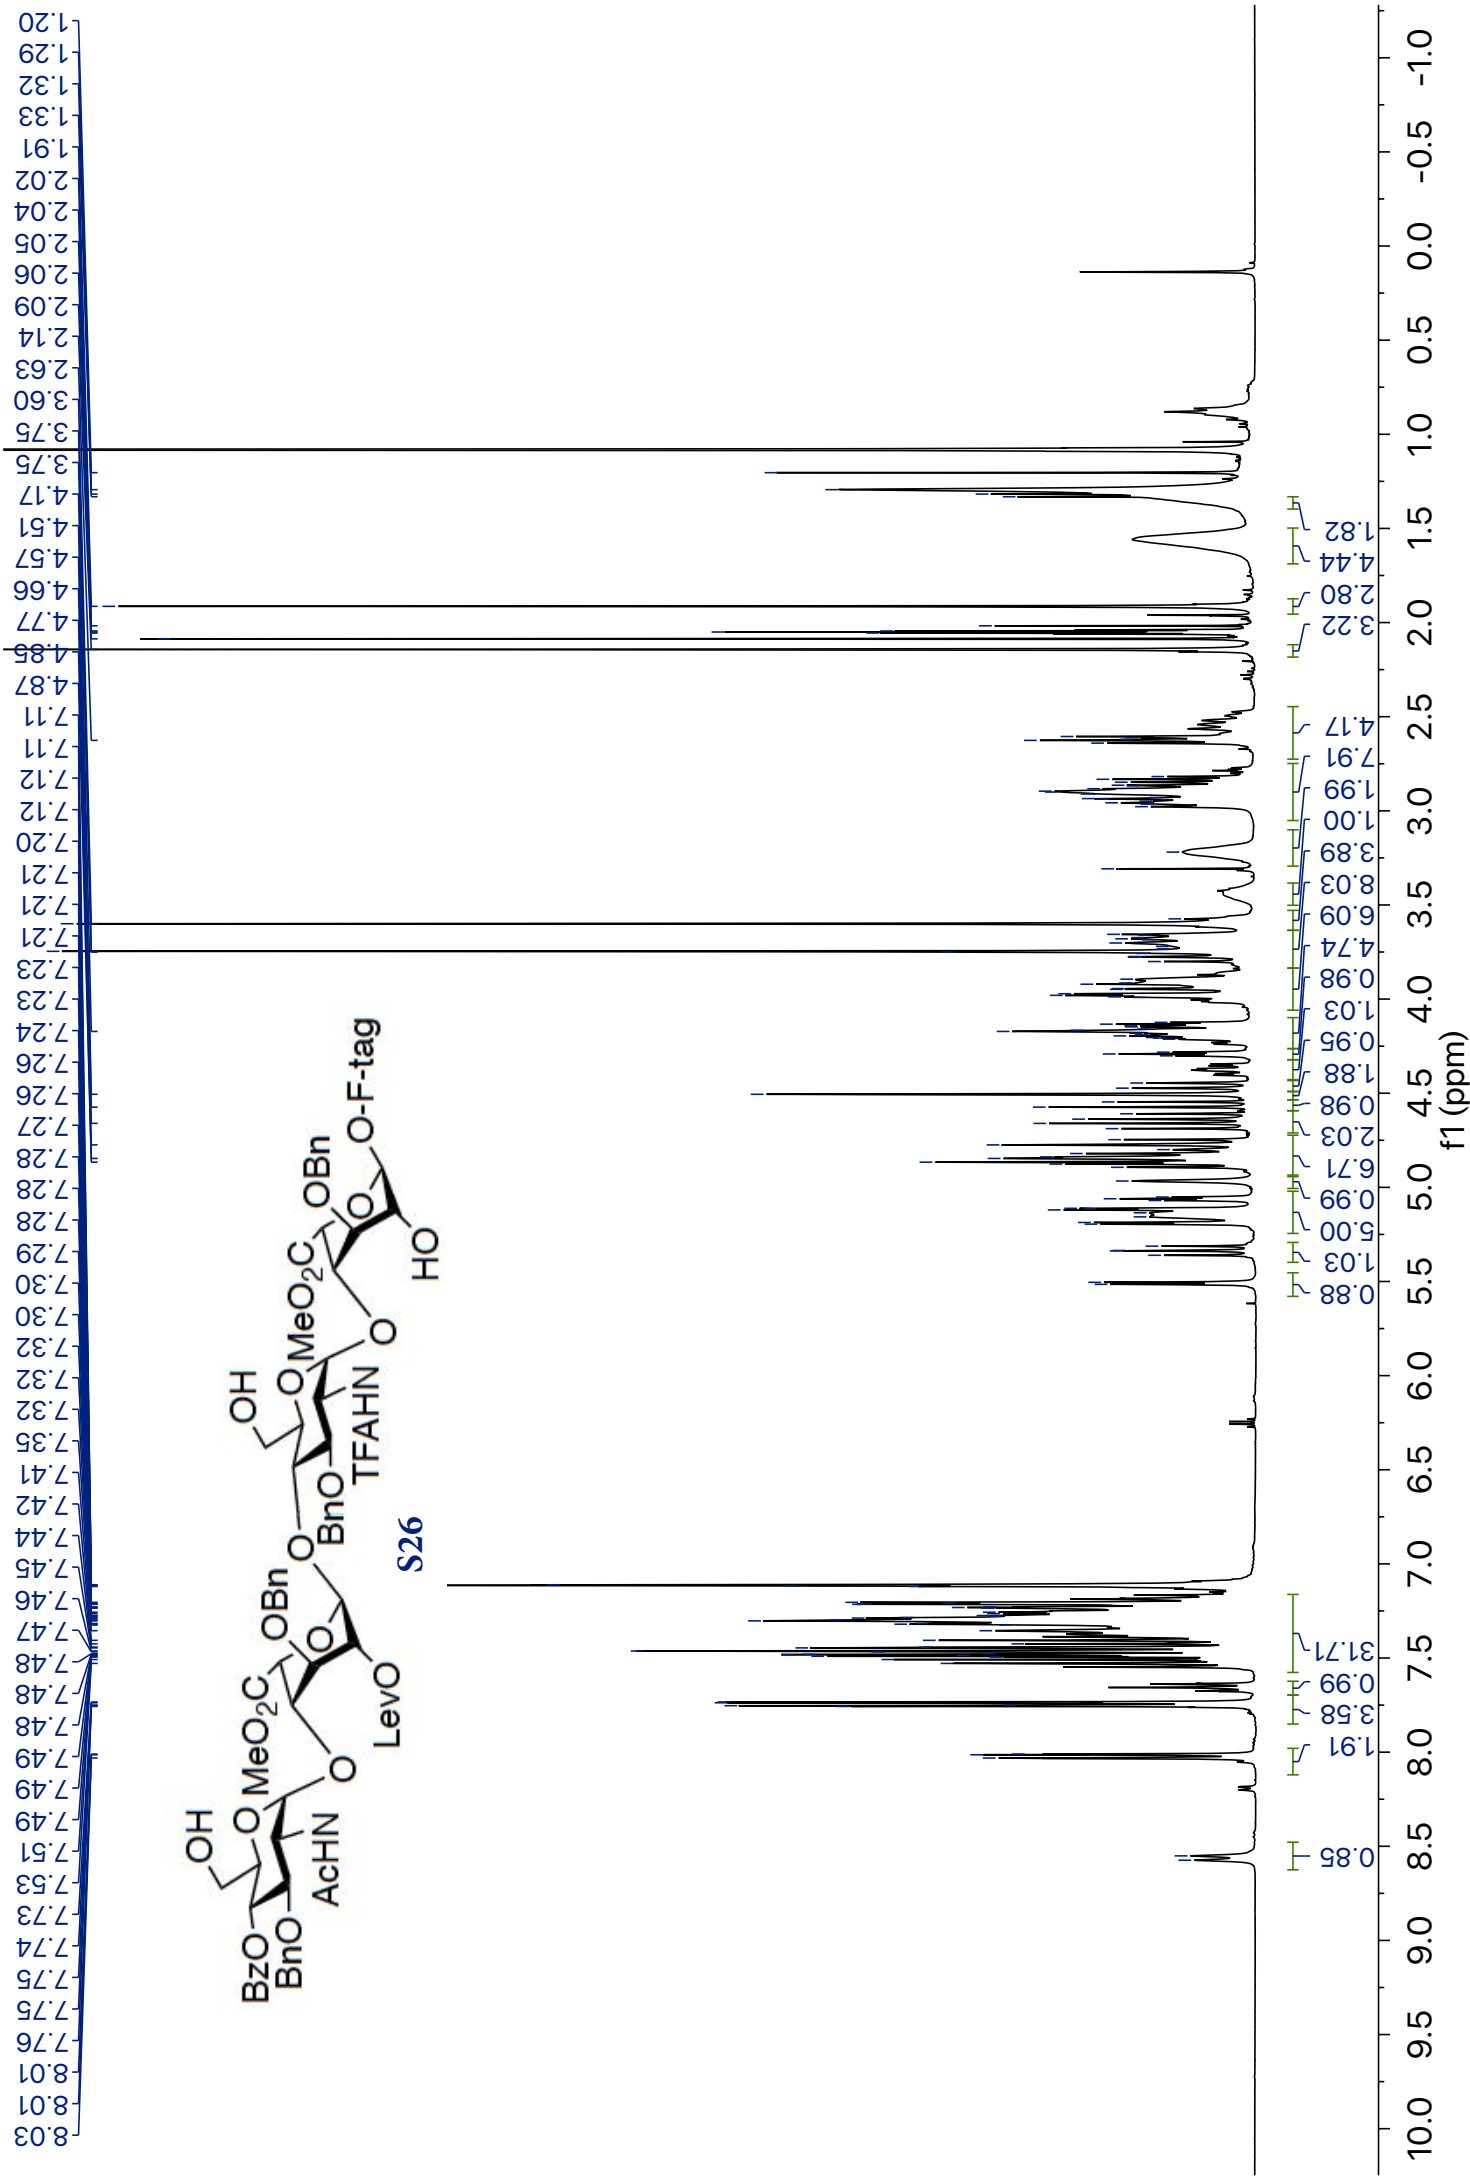

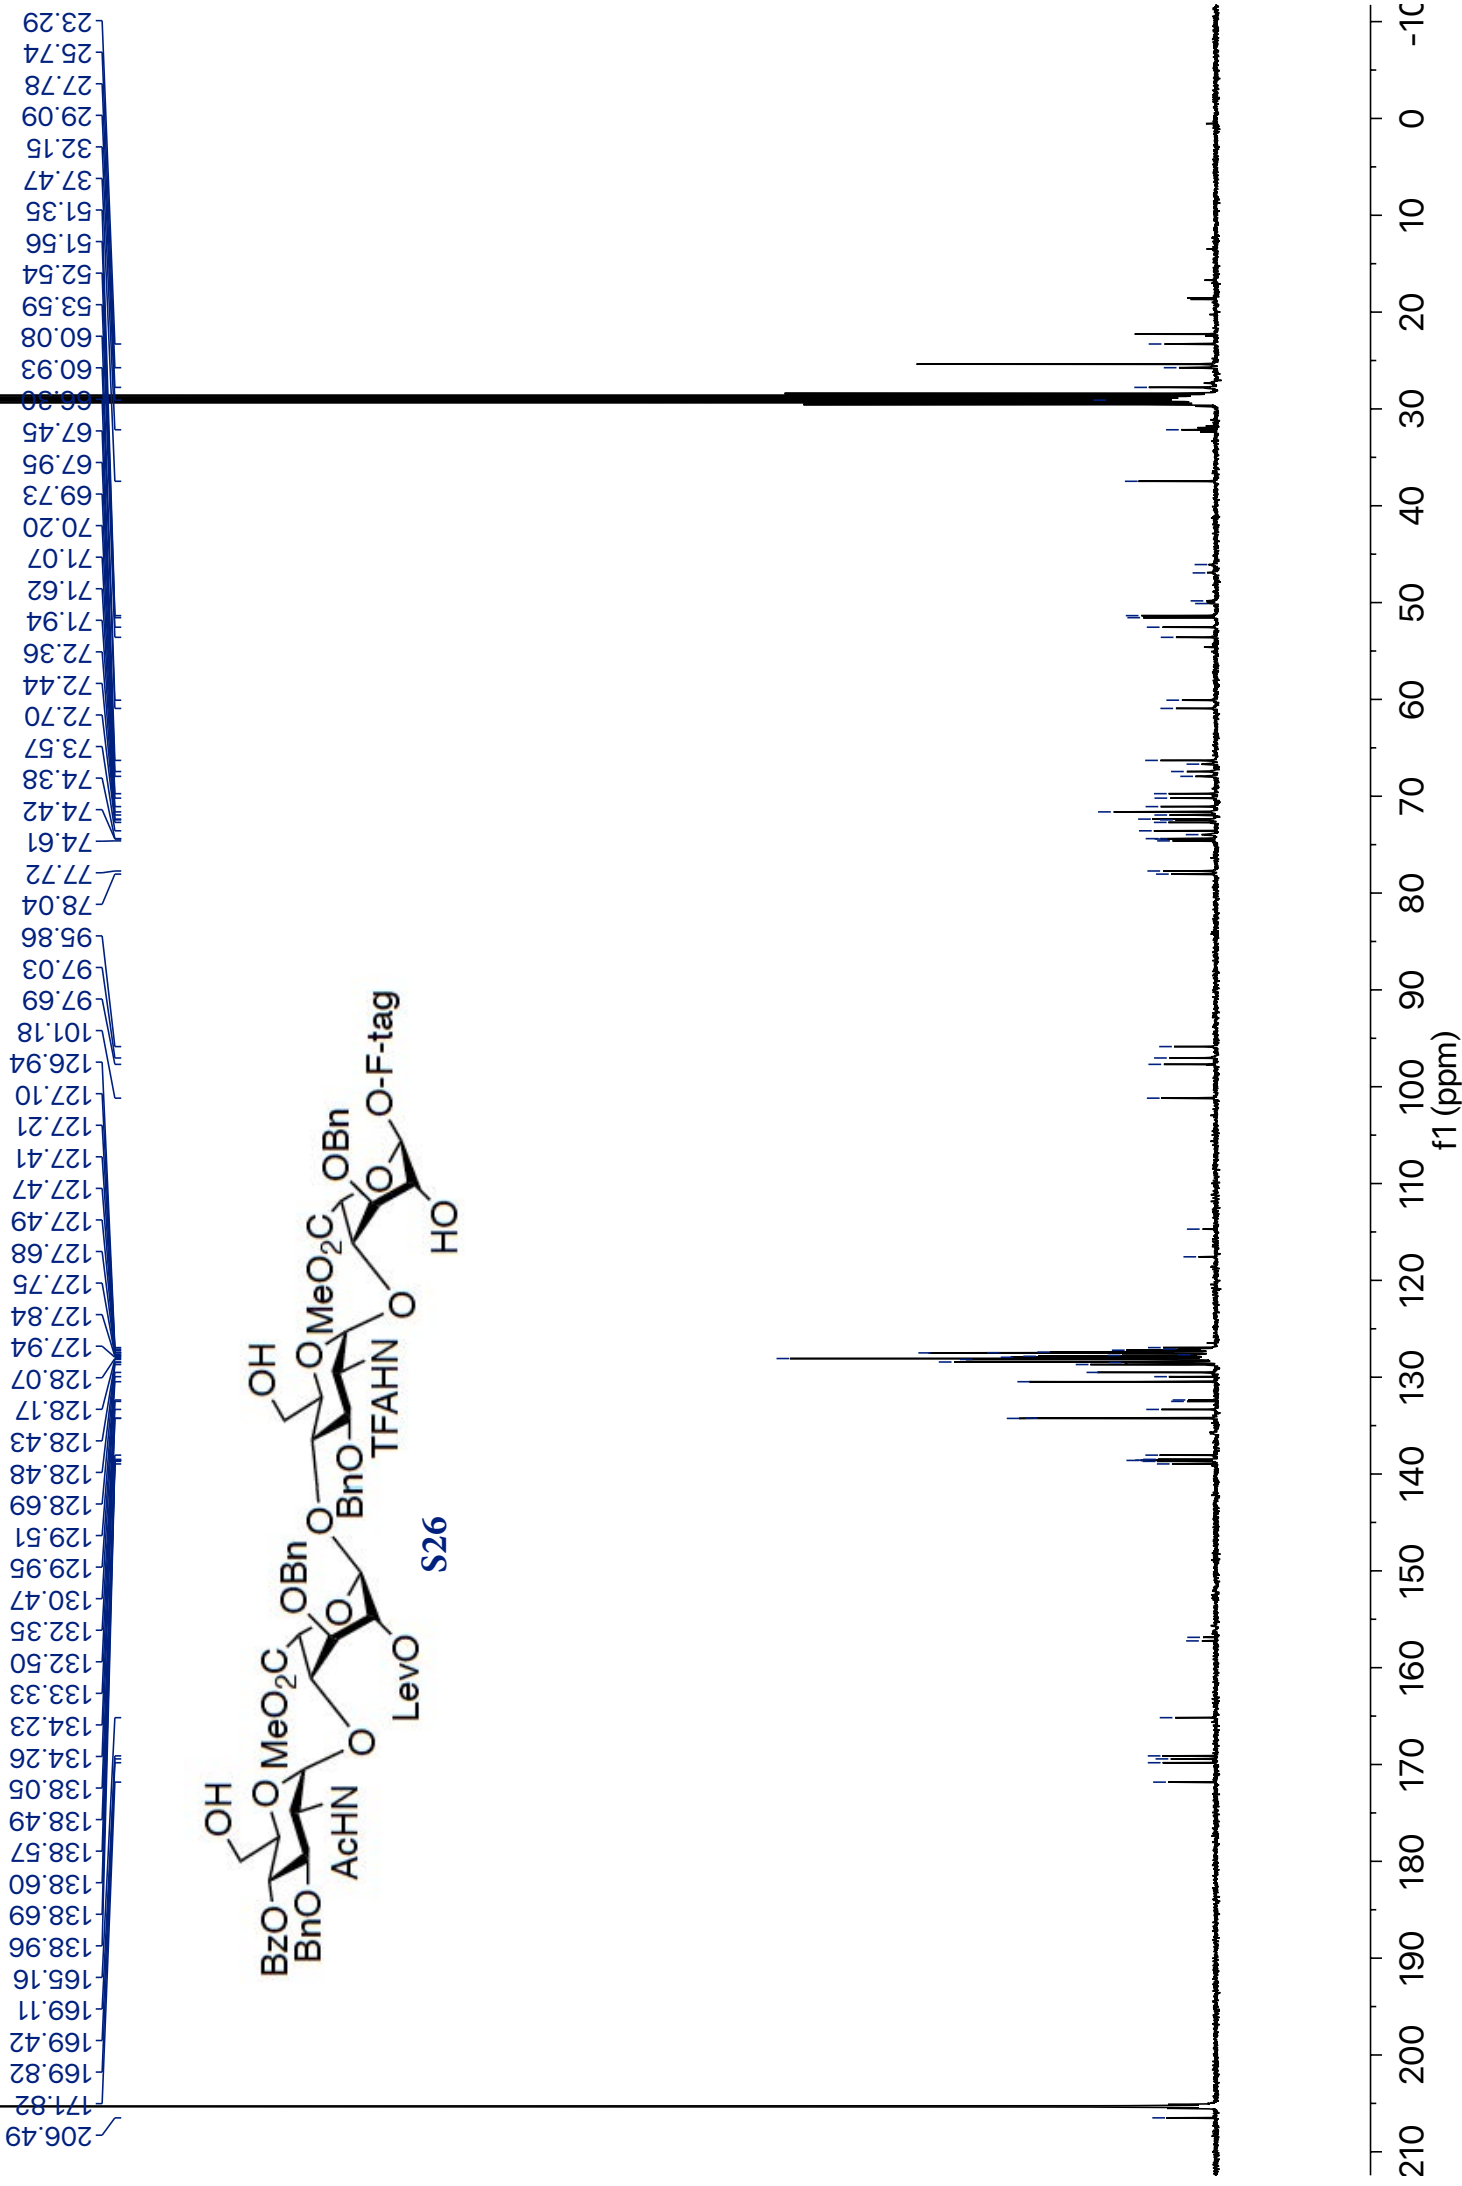

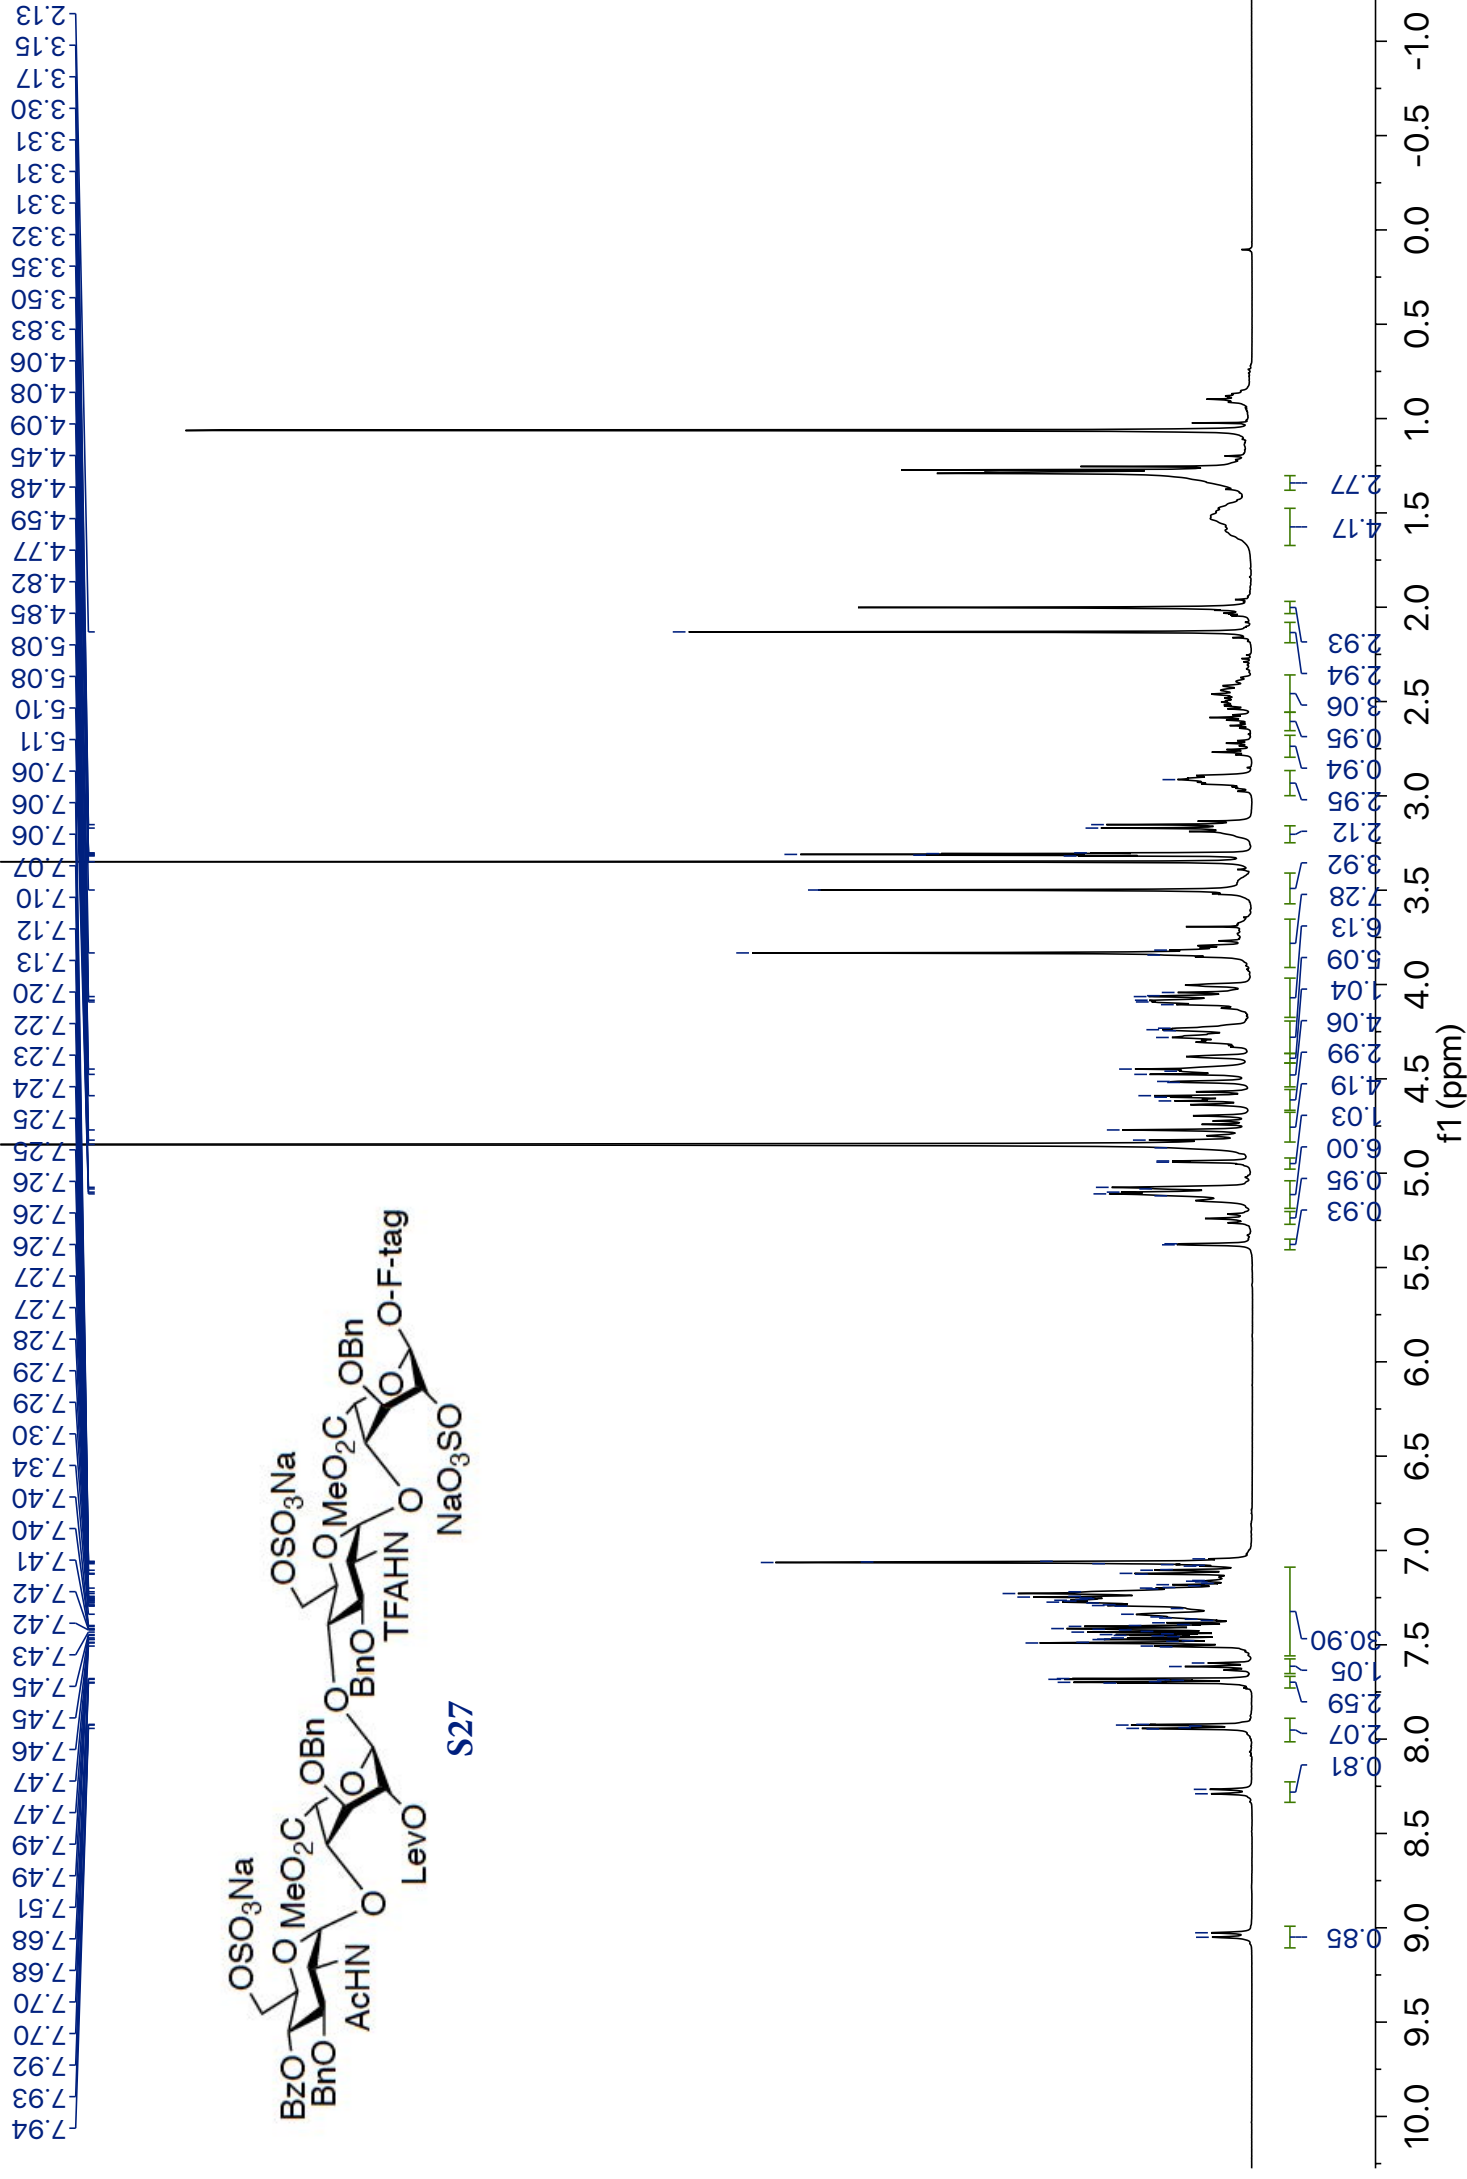

WL-2-255-D-NAc-D6-B6-A2-Tri-O-Sulfation-C.5.1.r —

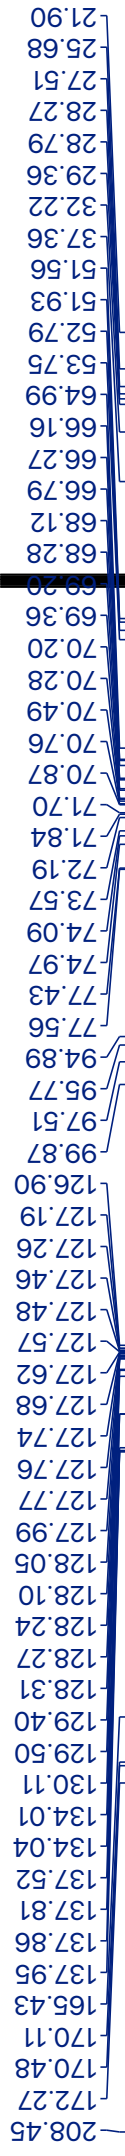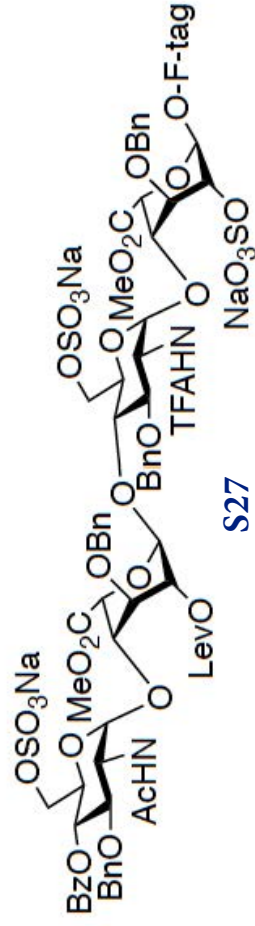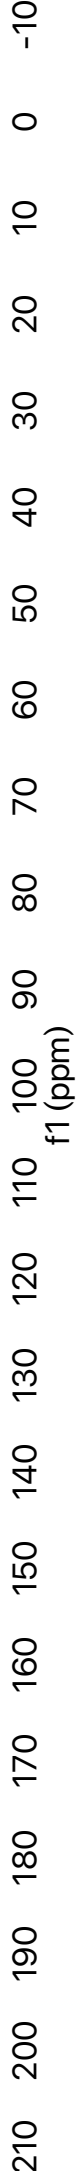

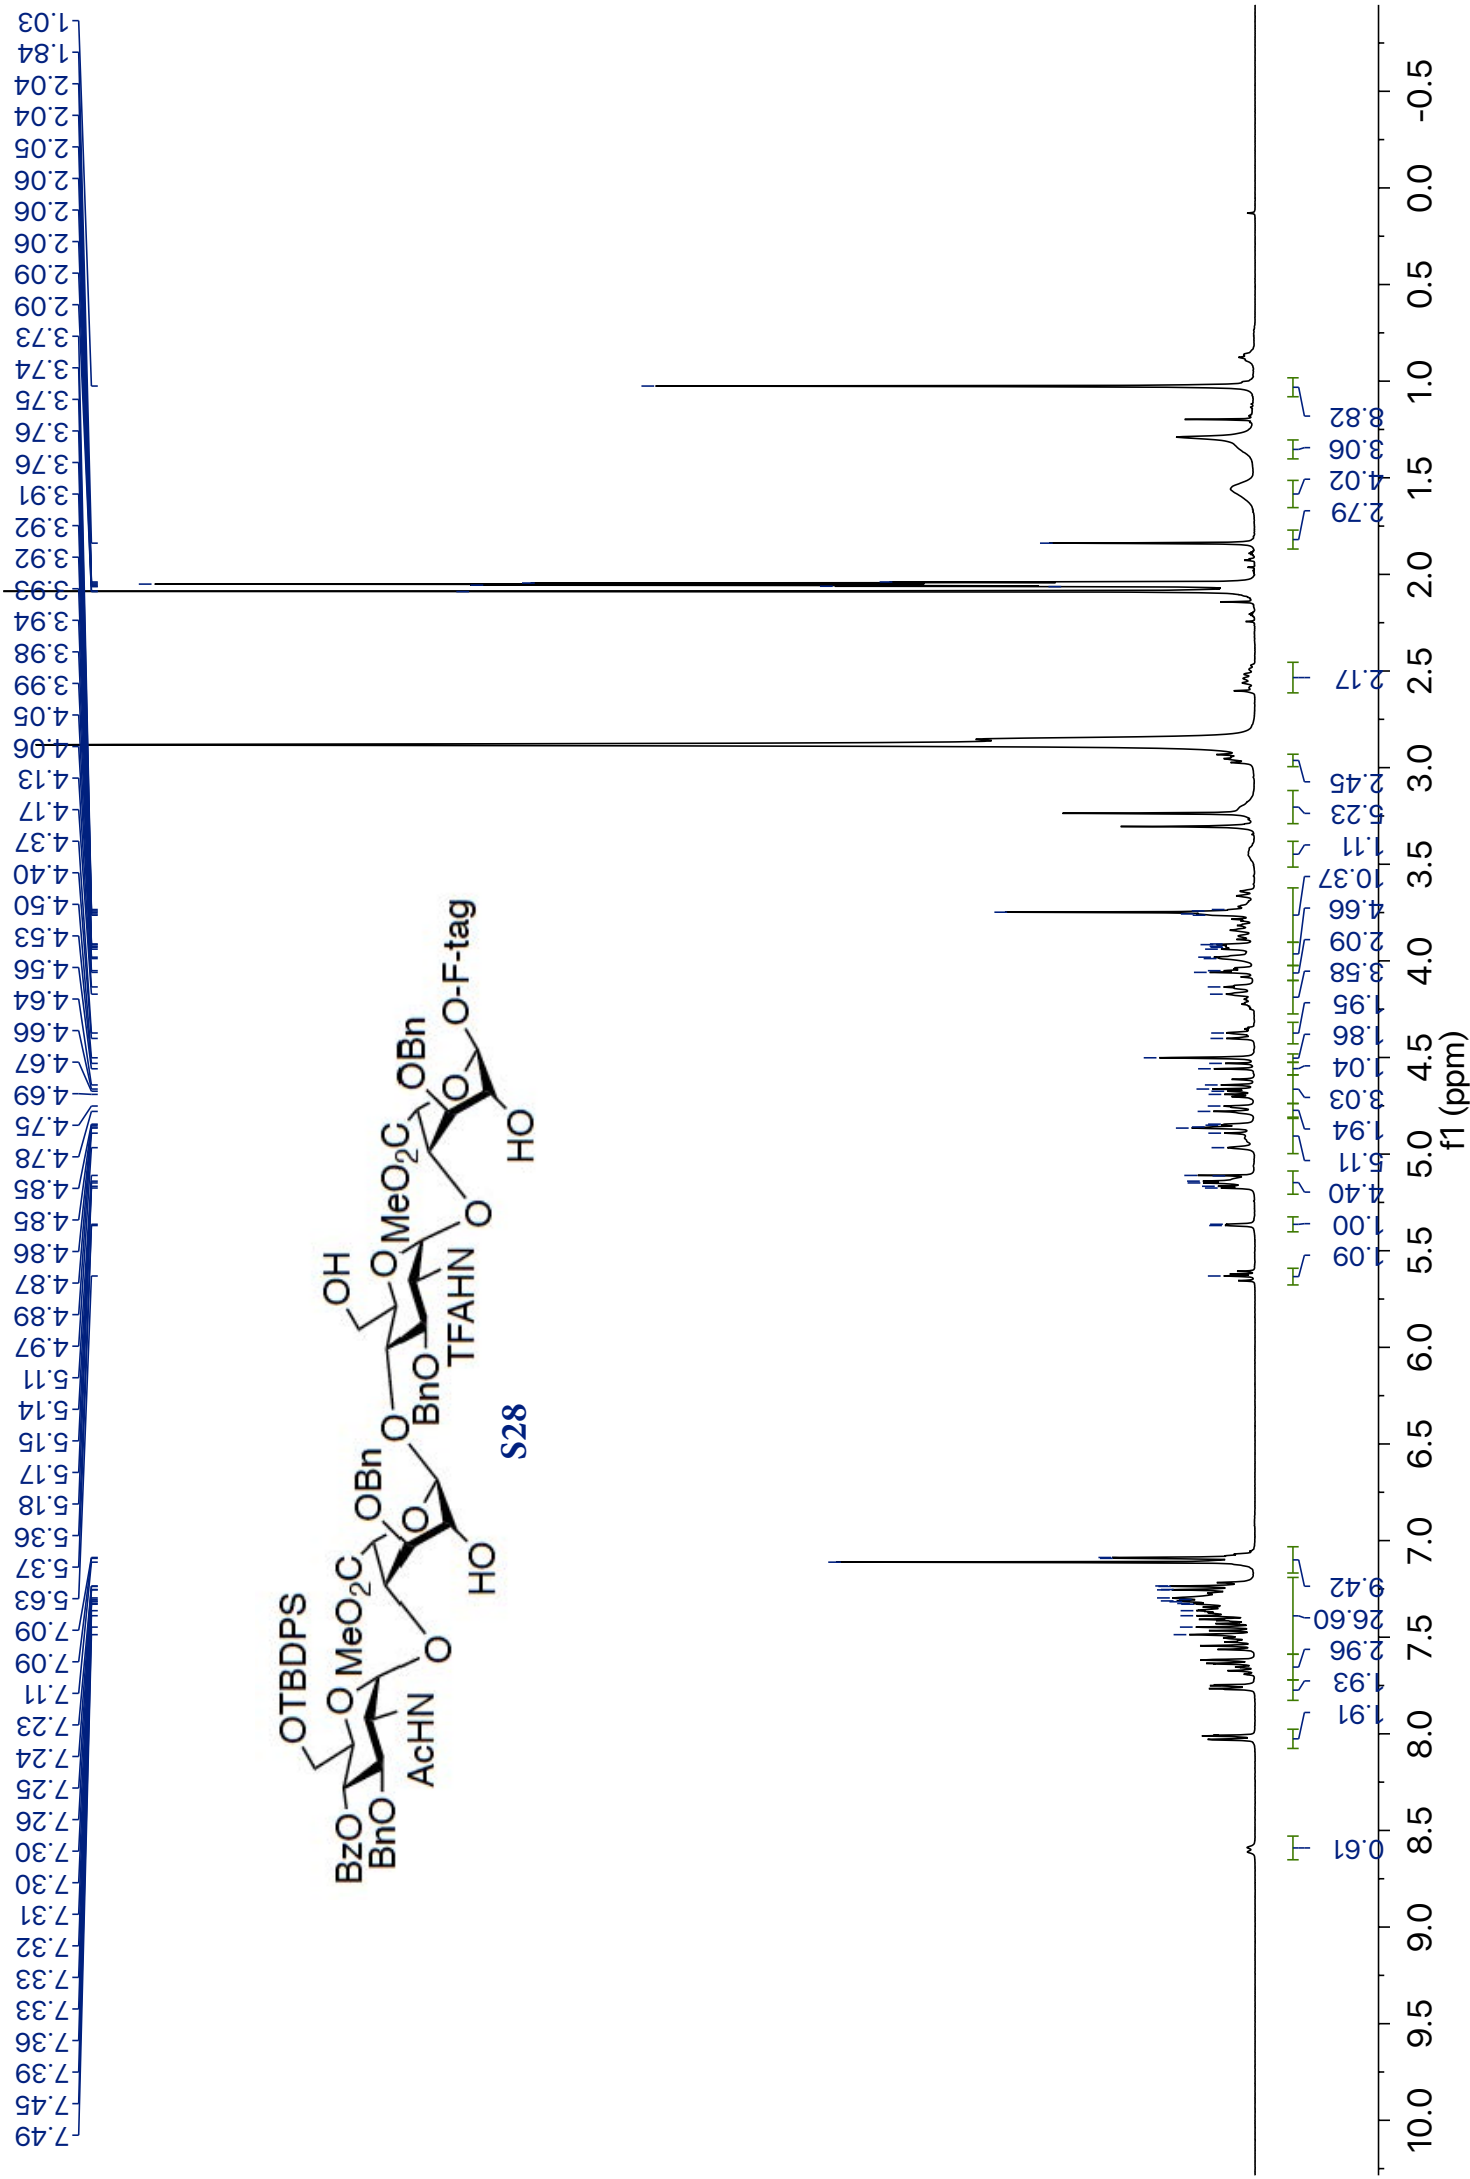

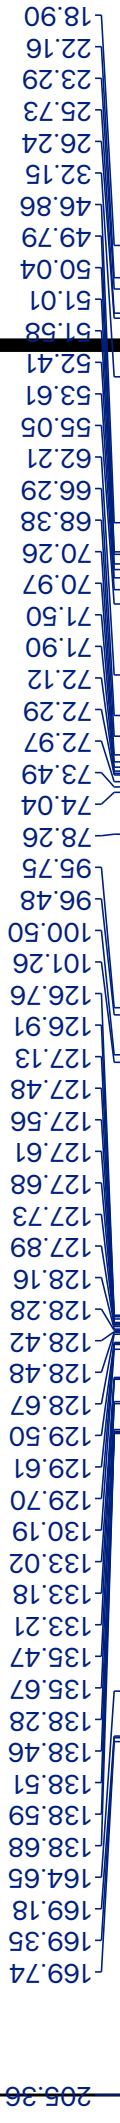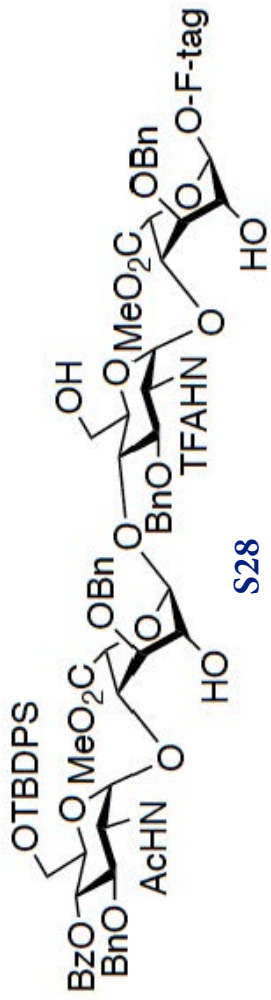

f1 (ppm)



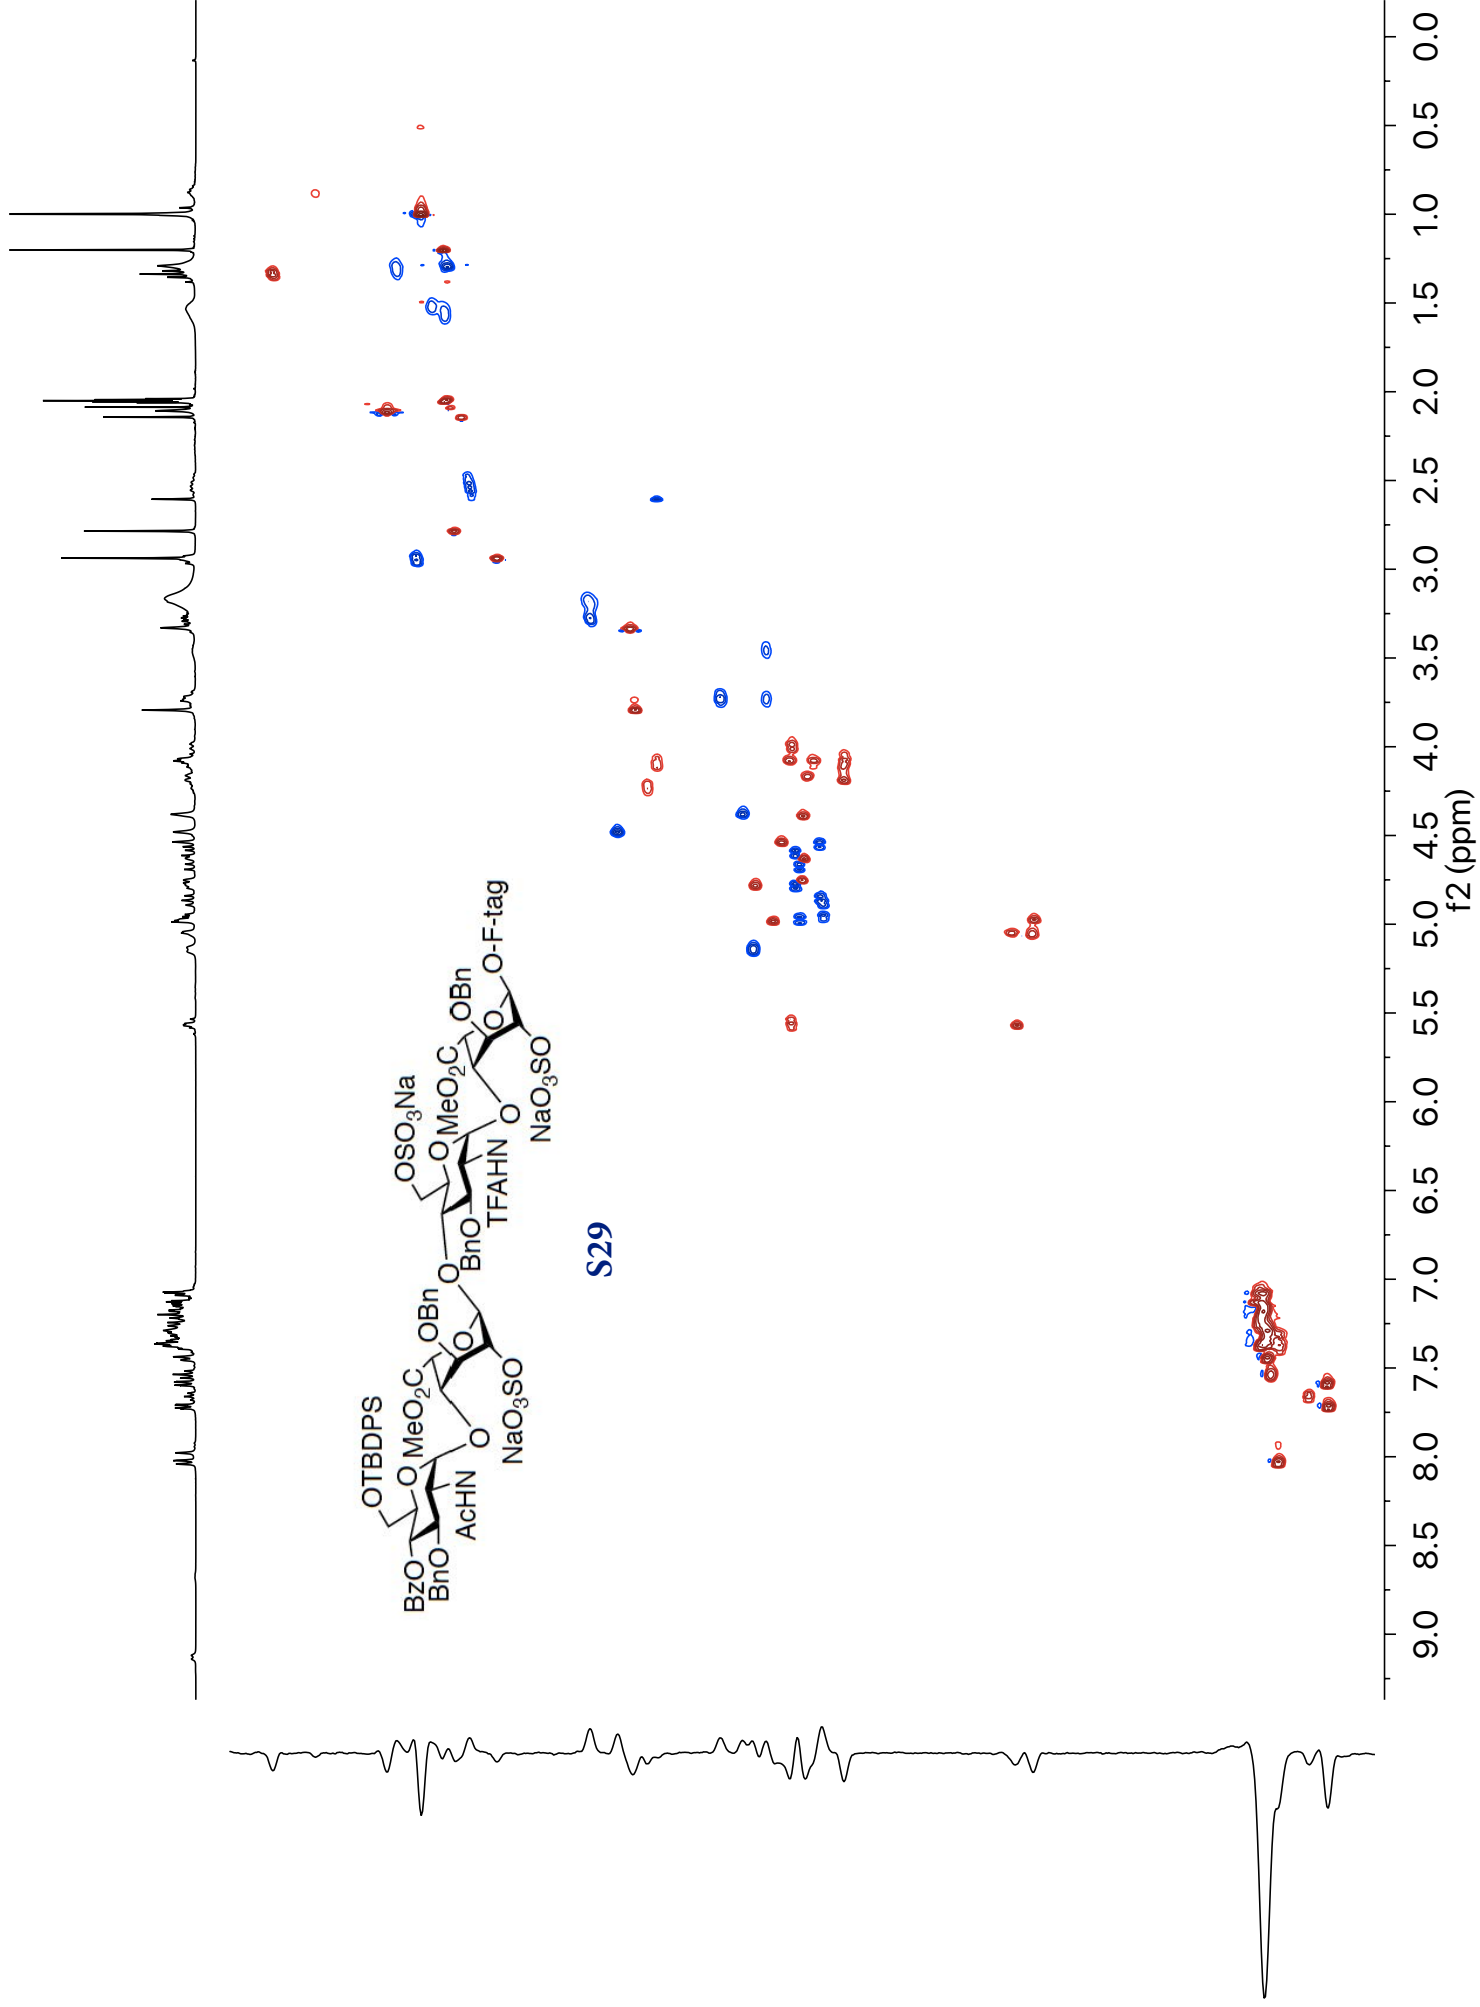



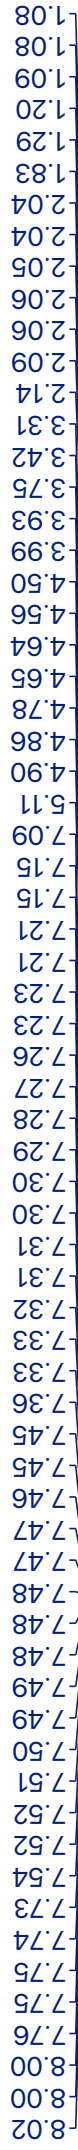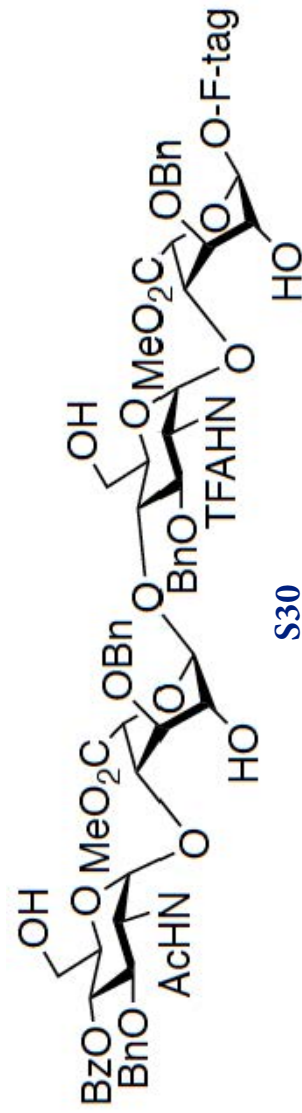

S30

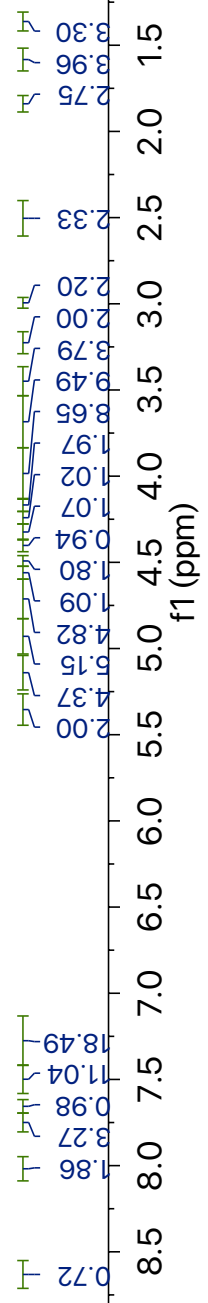



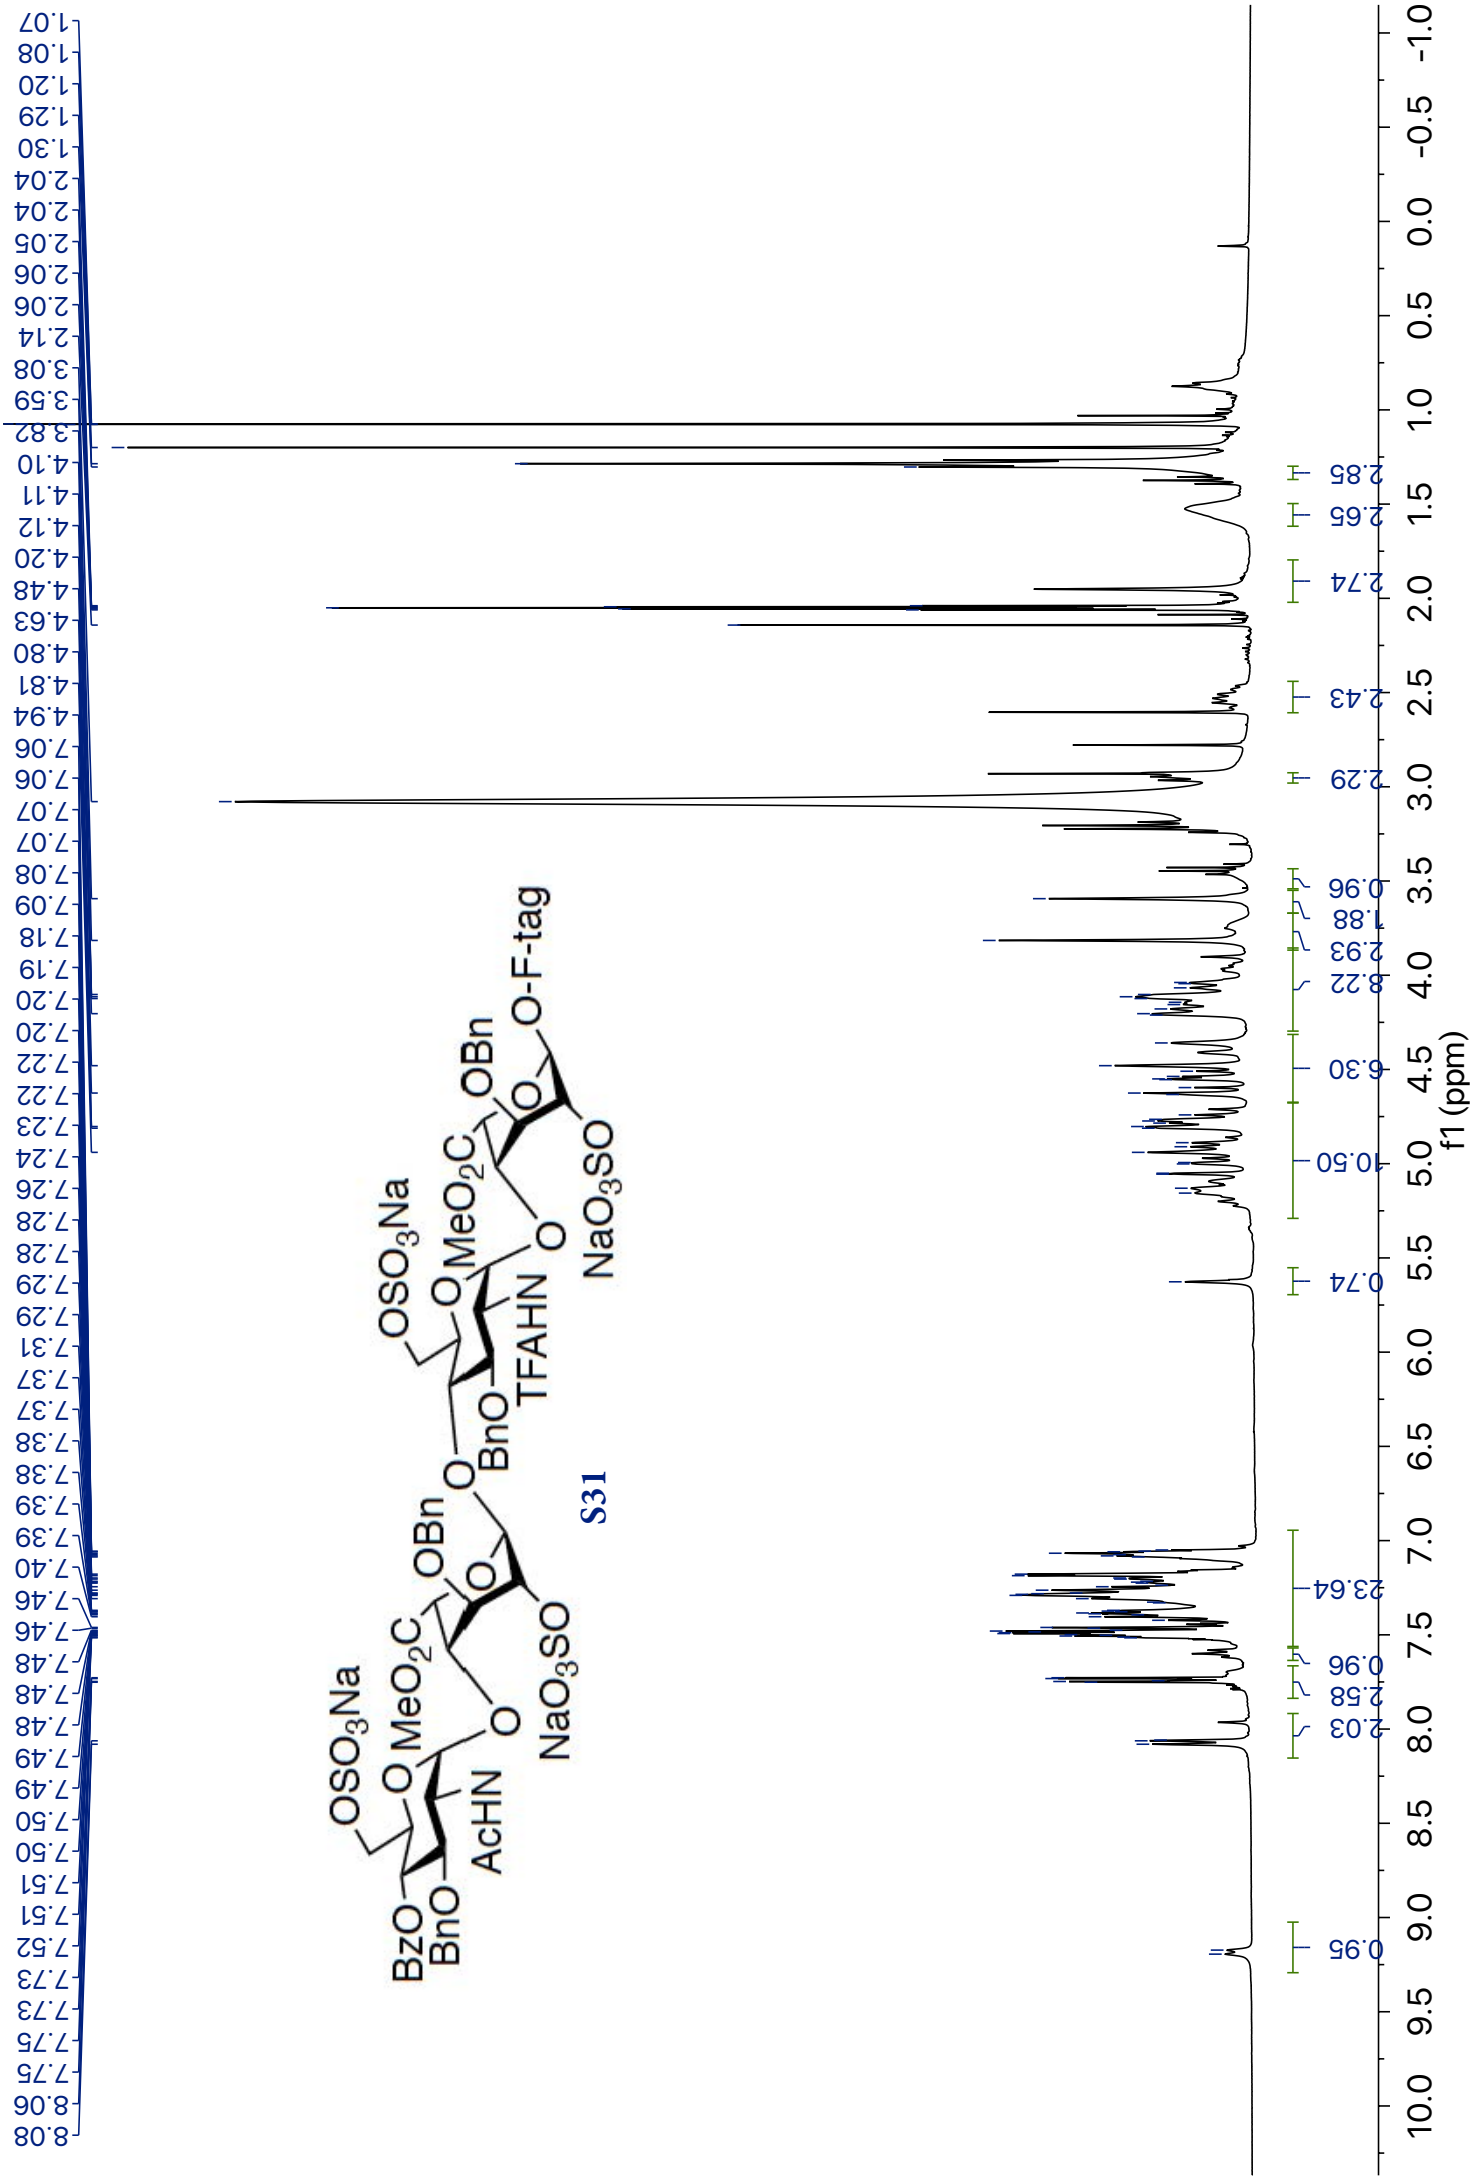





WL-2-125-D-NAc-C-2SO3-A-2SO3-C.1.1.1r

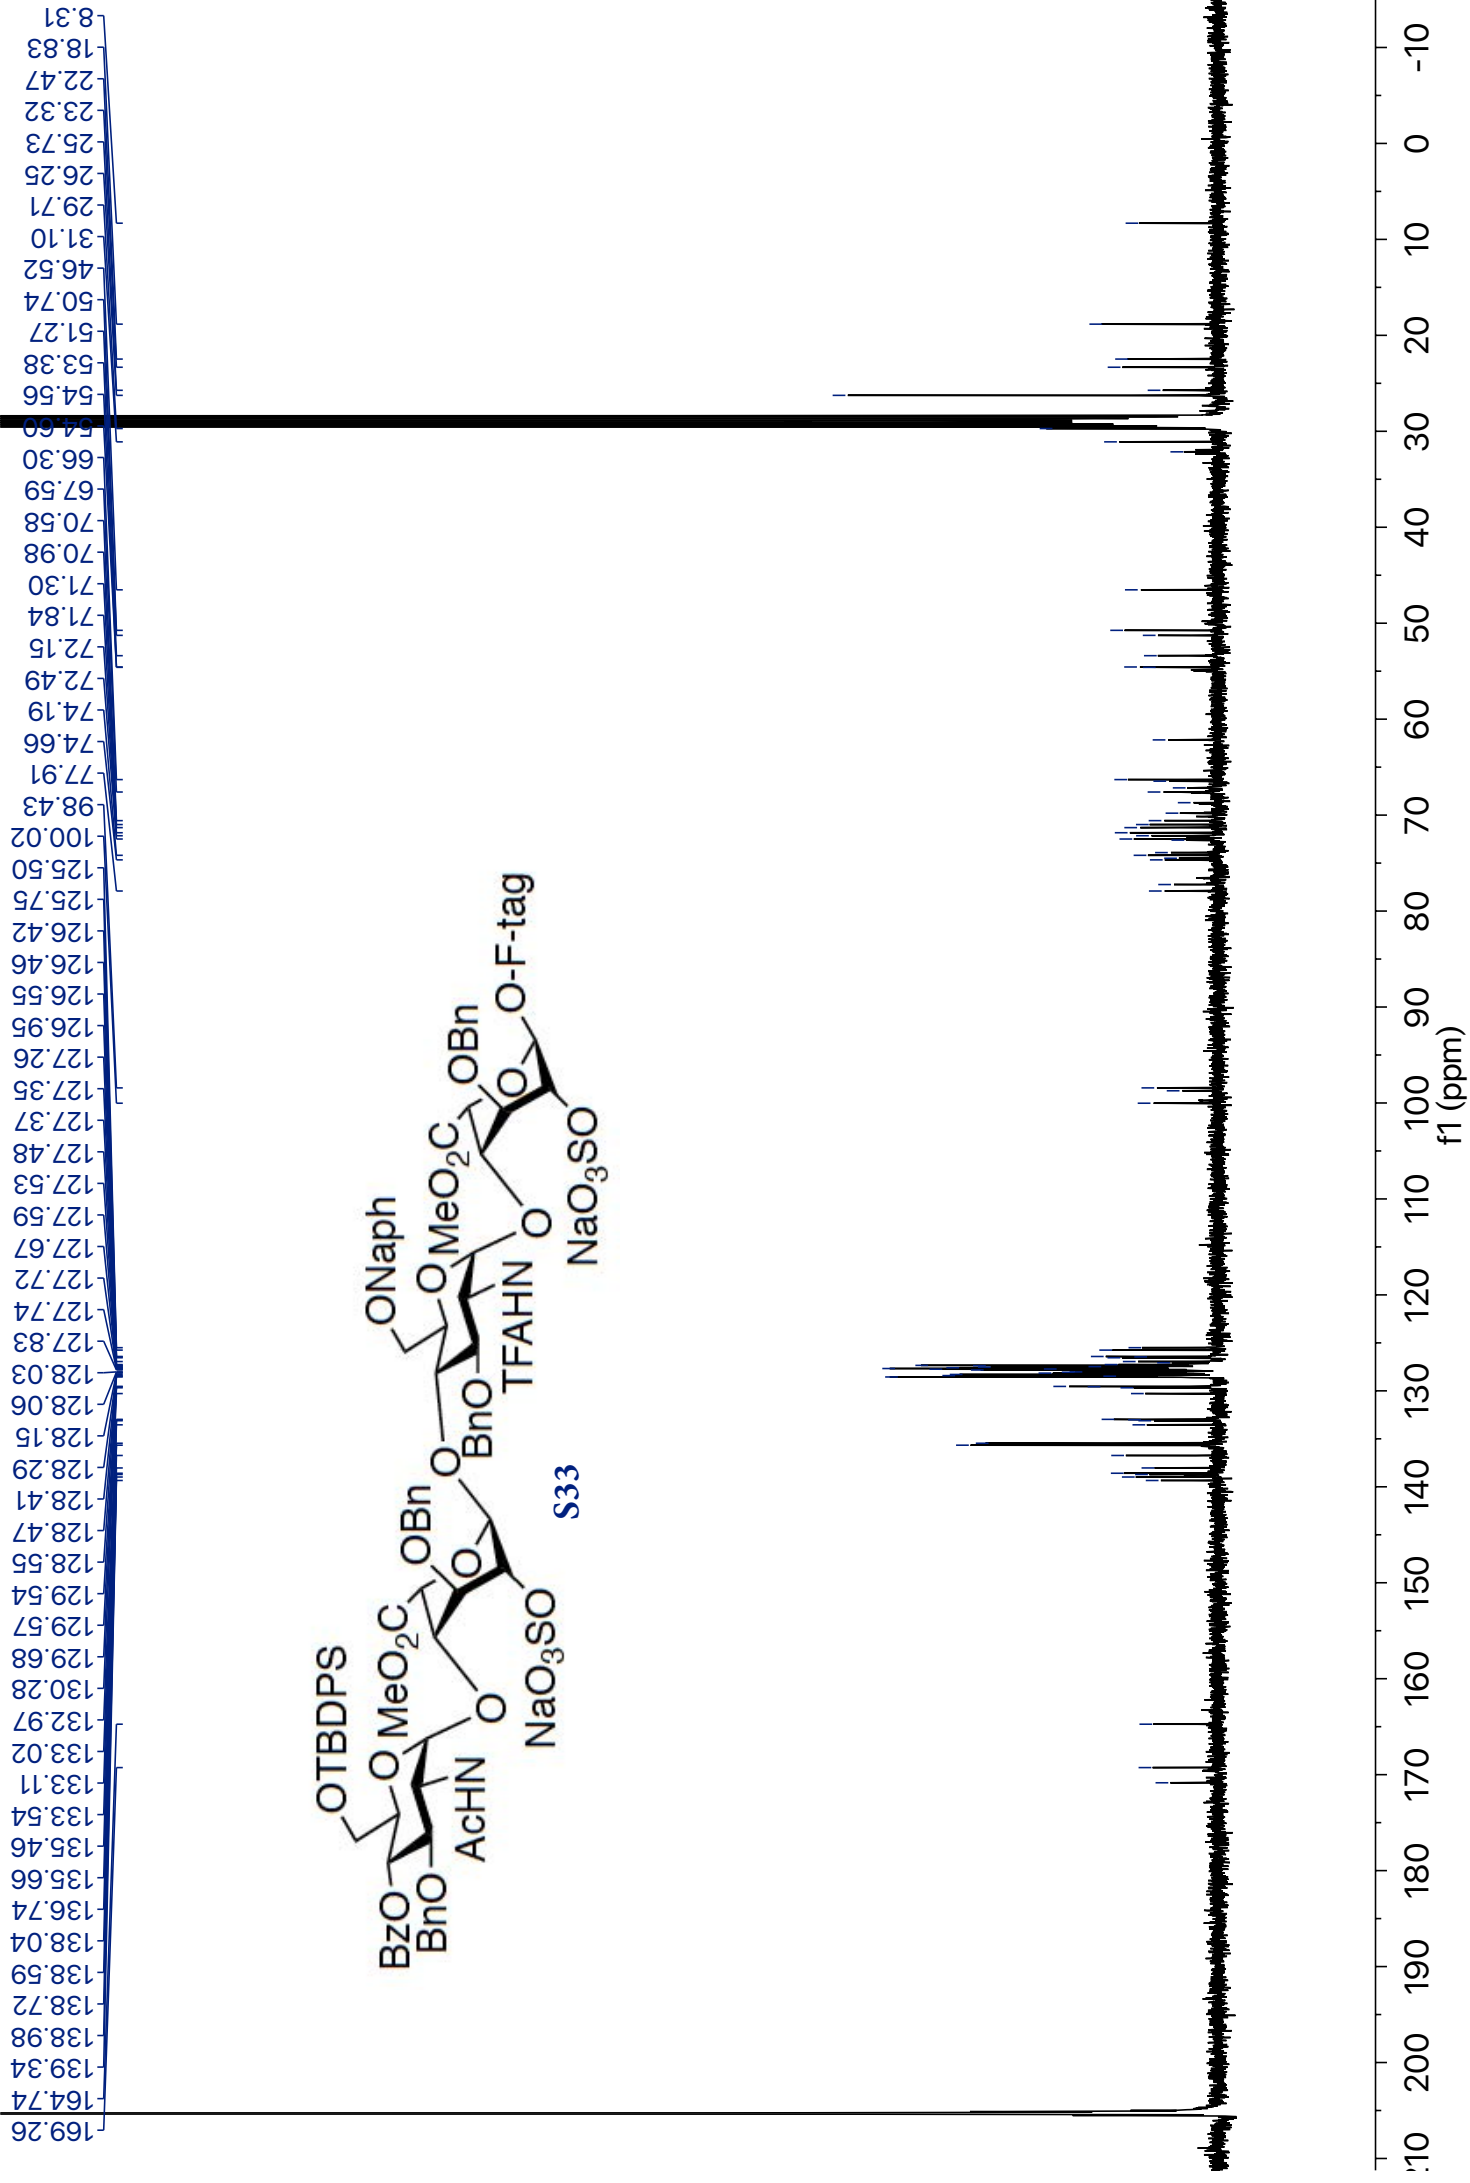

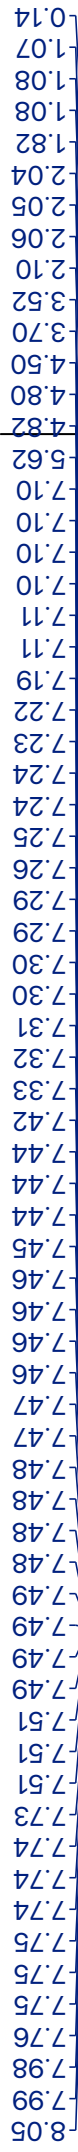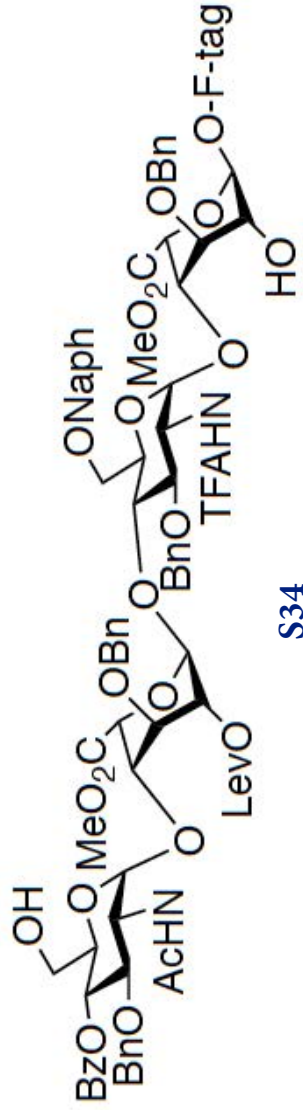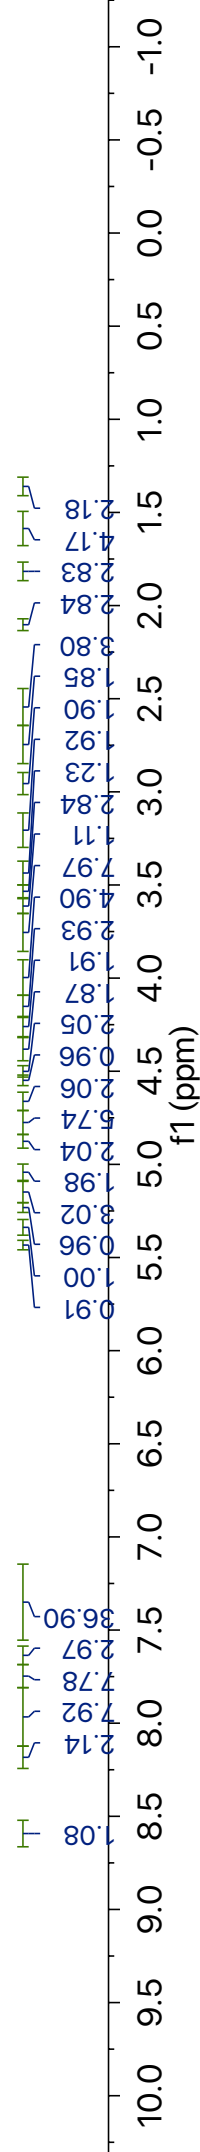

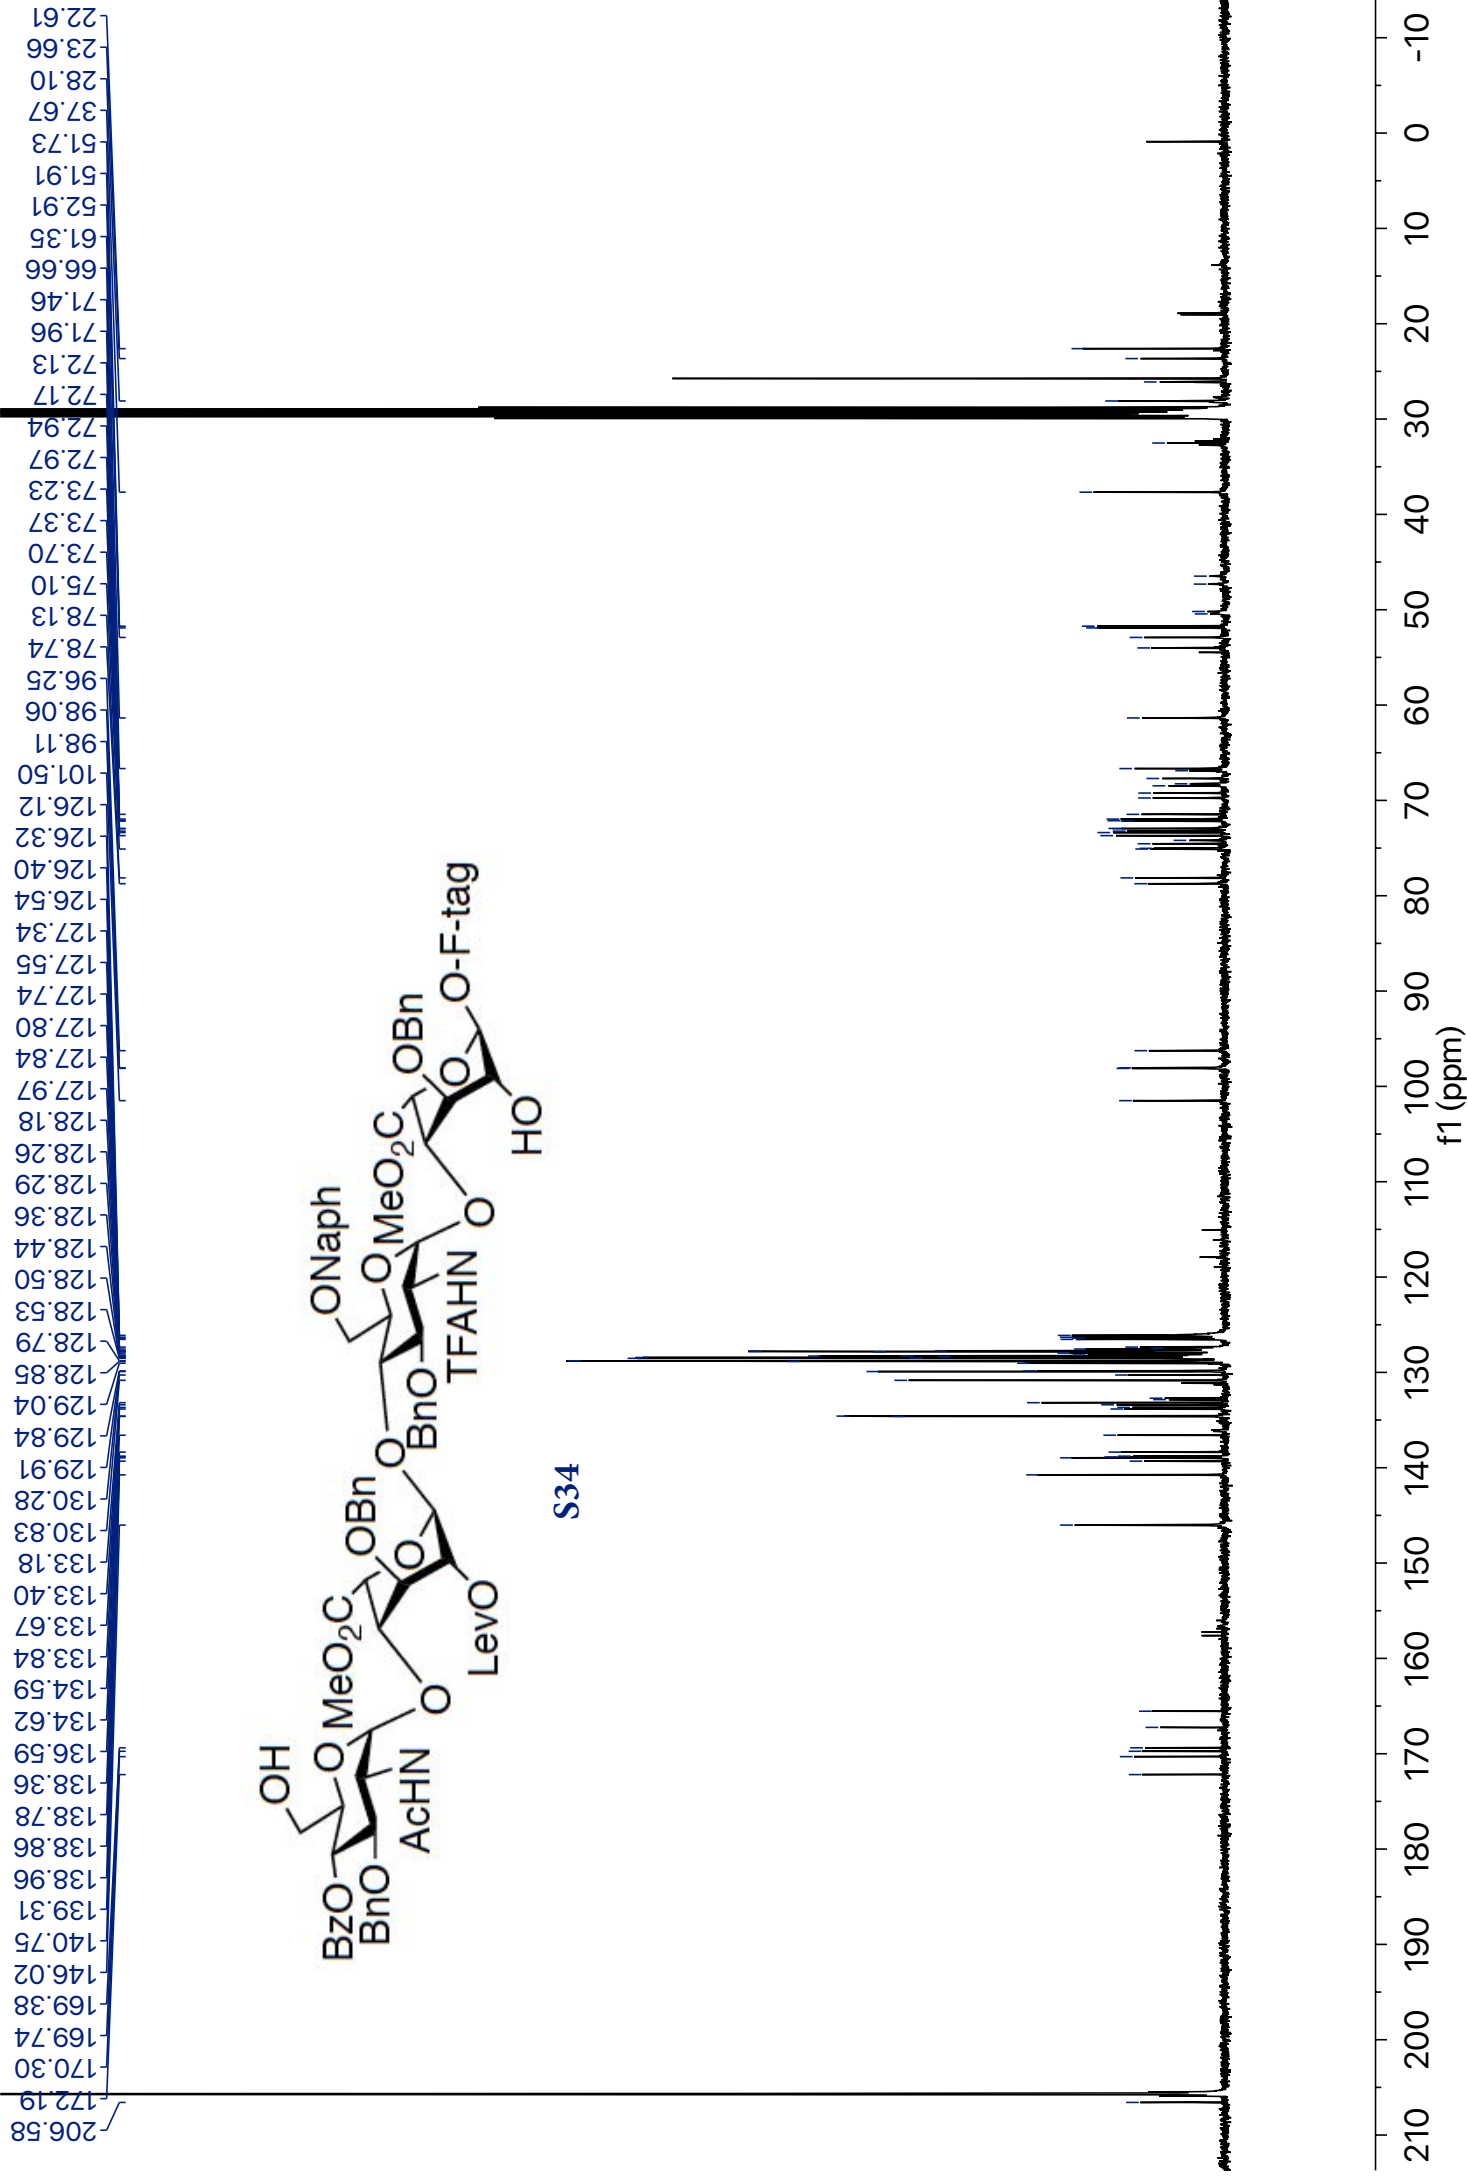



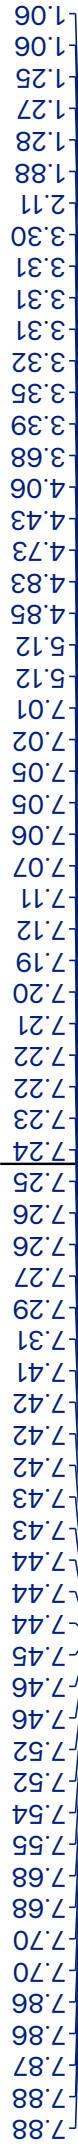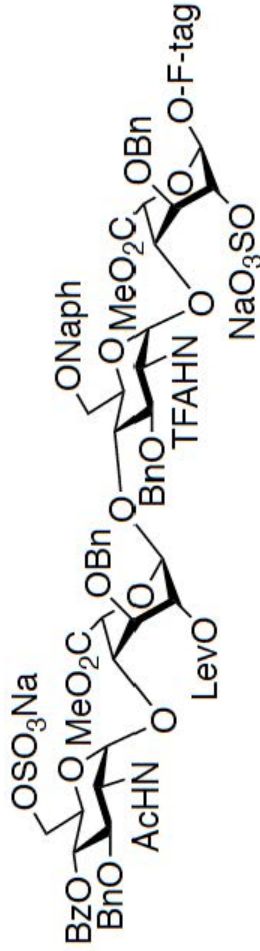

S35

| Chemical Shift (ppm) | Integration |
|----------------------|-------------|
| 7.00                 | 0.01        |
| 7.18                 | 1.18        |
| 7.21                 | 5.99        |
| 7.22                 | 1.02        |
| 7.24                 | 8.07        |
| 7.26                 | 5.99        |
| 7.27                 | 1.02        |
| 7.29                 | 5.99        |
| 7.31                 | 1.02        |
| 7.41                 | 1.09        |
| 7.42                 | 7.99        |
| 7.43                 | 1.09        |
| 7.44                 | 7.99        |
| 7.45                 | 1.09        |
| 7.46                 | 7.99        |
| 7.52                 | 1.09        |
| 7.54                 | 7.99        |
| 7.55                 | 1.09        |
| 7.68                 | 1.09        |
| 7.70                 | 7.99        |
| 7.86                 | 1.09        |
| 7.87                 | 7.99        |
| 7.88                 | 1.09        |
| 8.06                 | 0.86        |
| 8.84                 | 0.86        |
| 9.05                 | 0.53        |
| 9.83                 | 0.86        |
| 9.88                 | 0.86        |
| 10.08                | 0.86        |

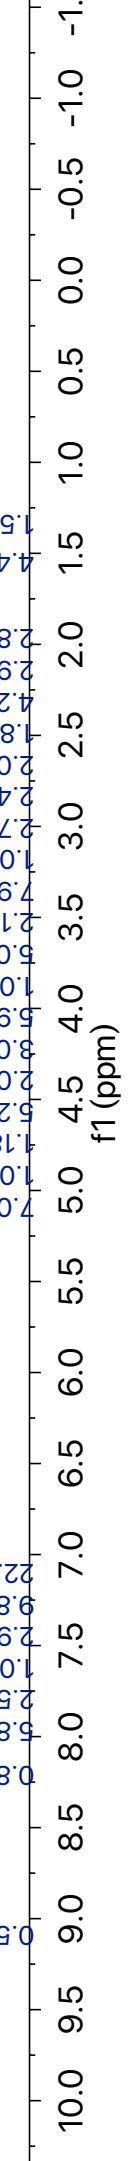

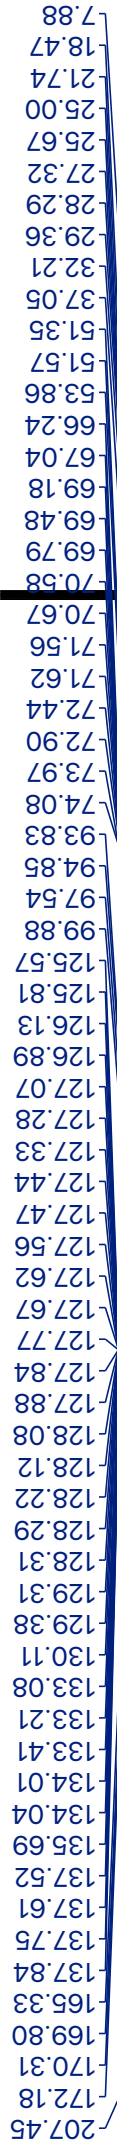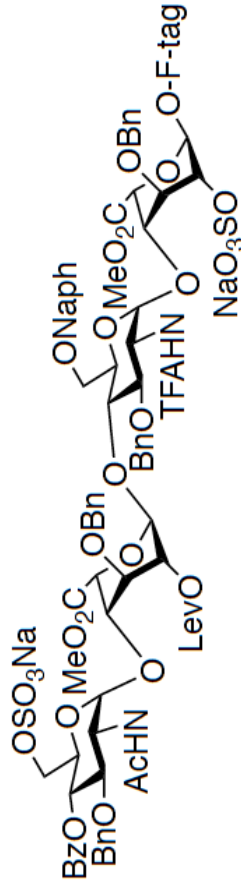

S35

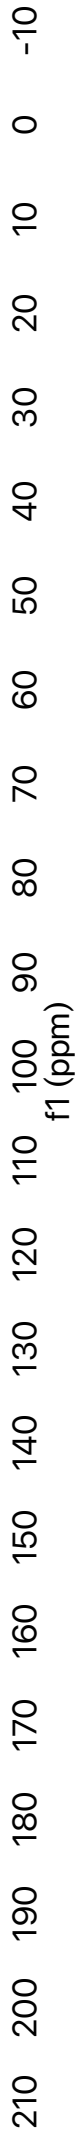

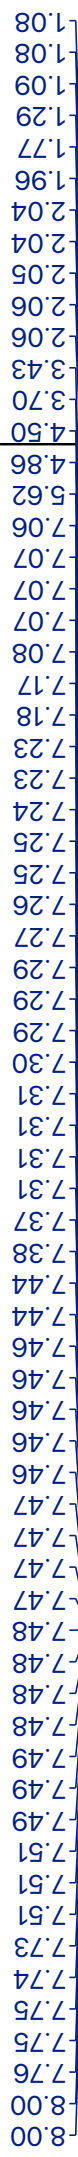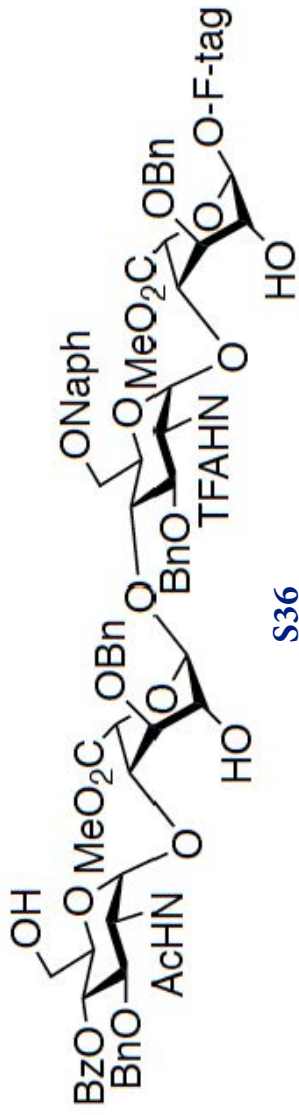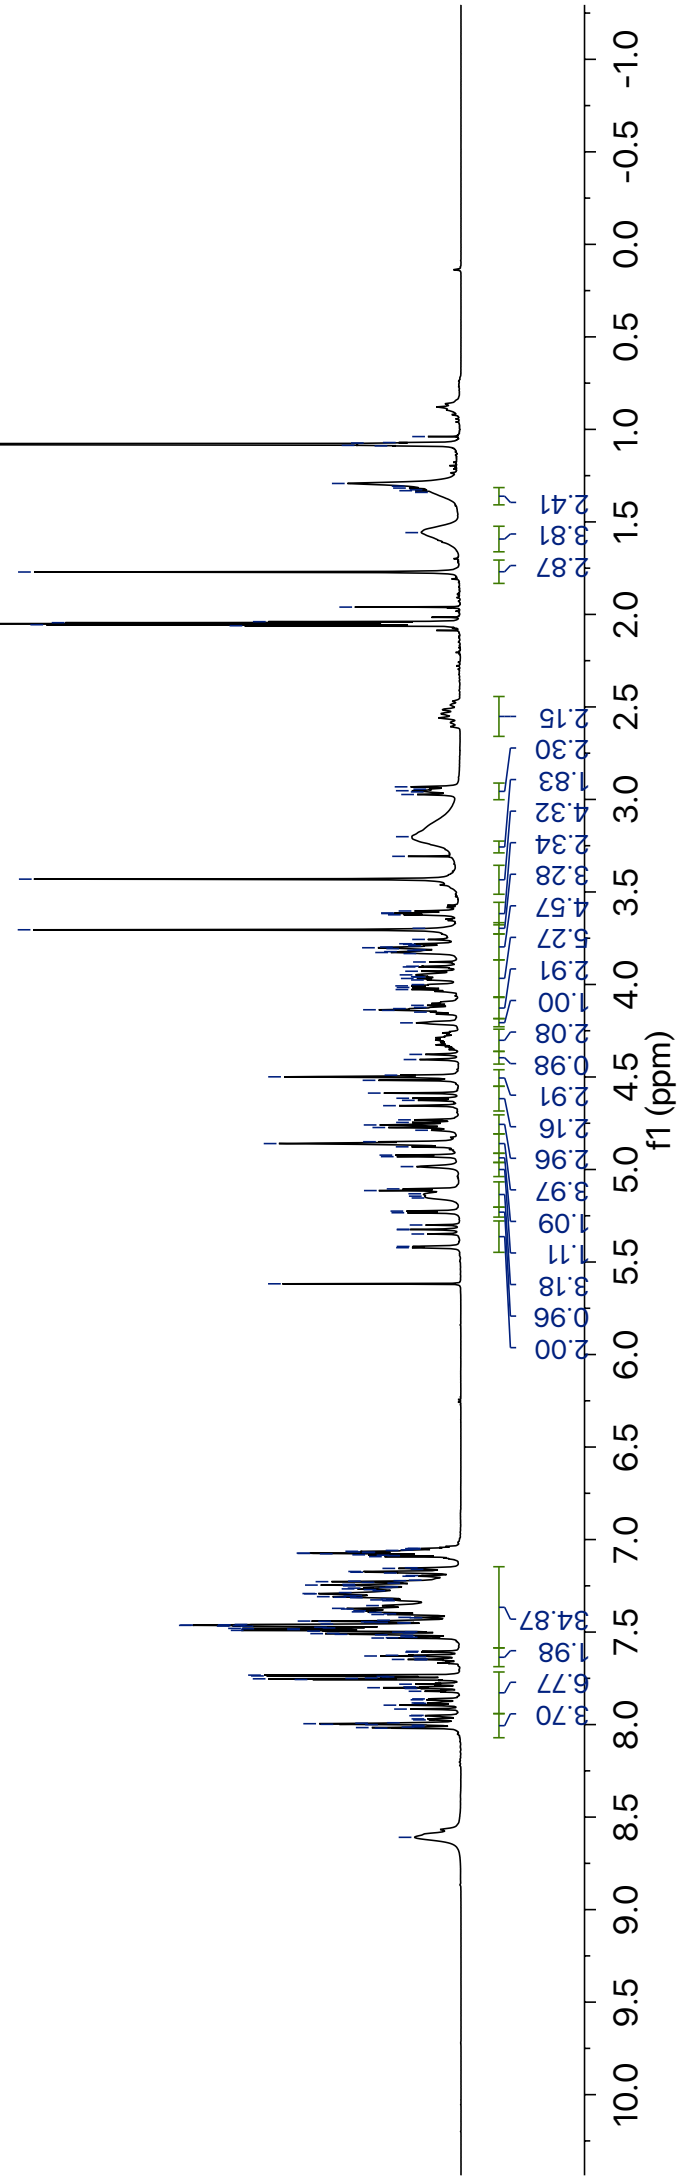



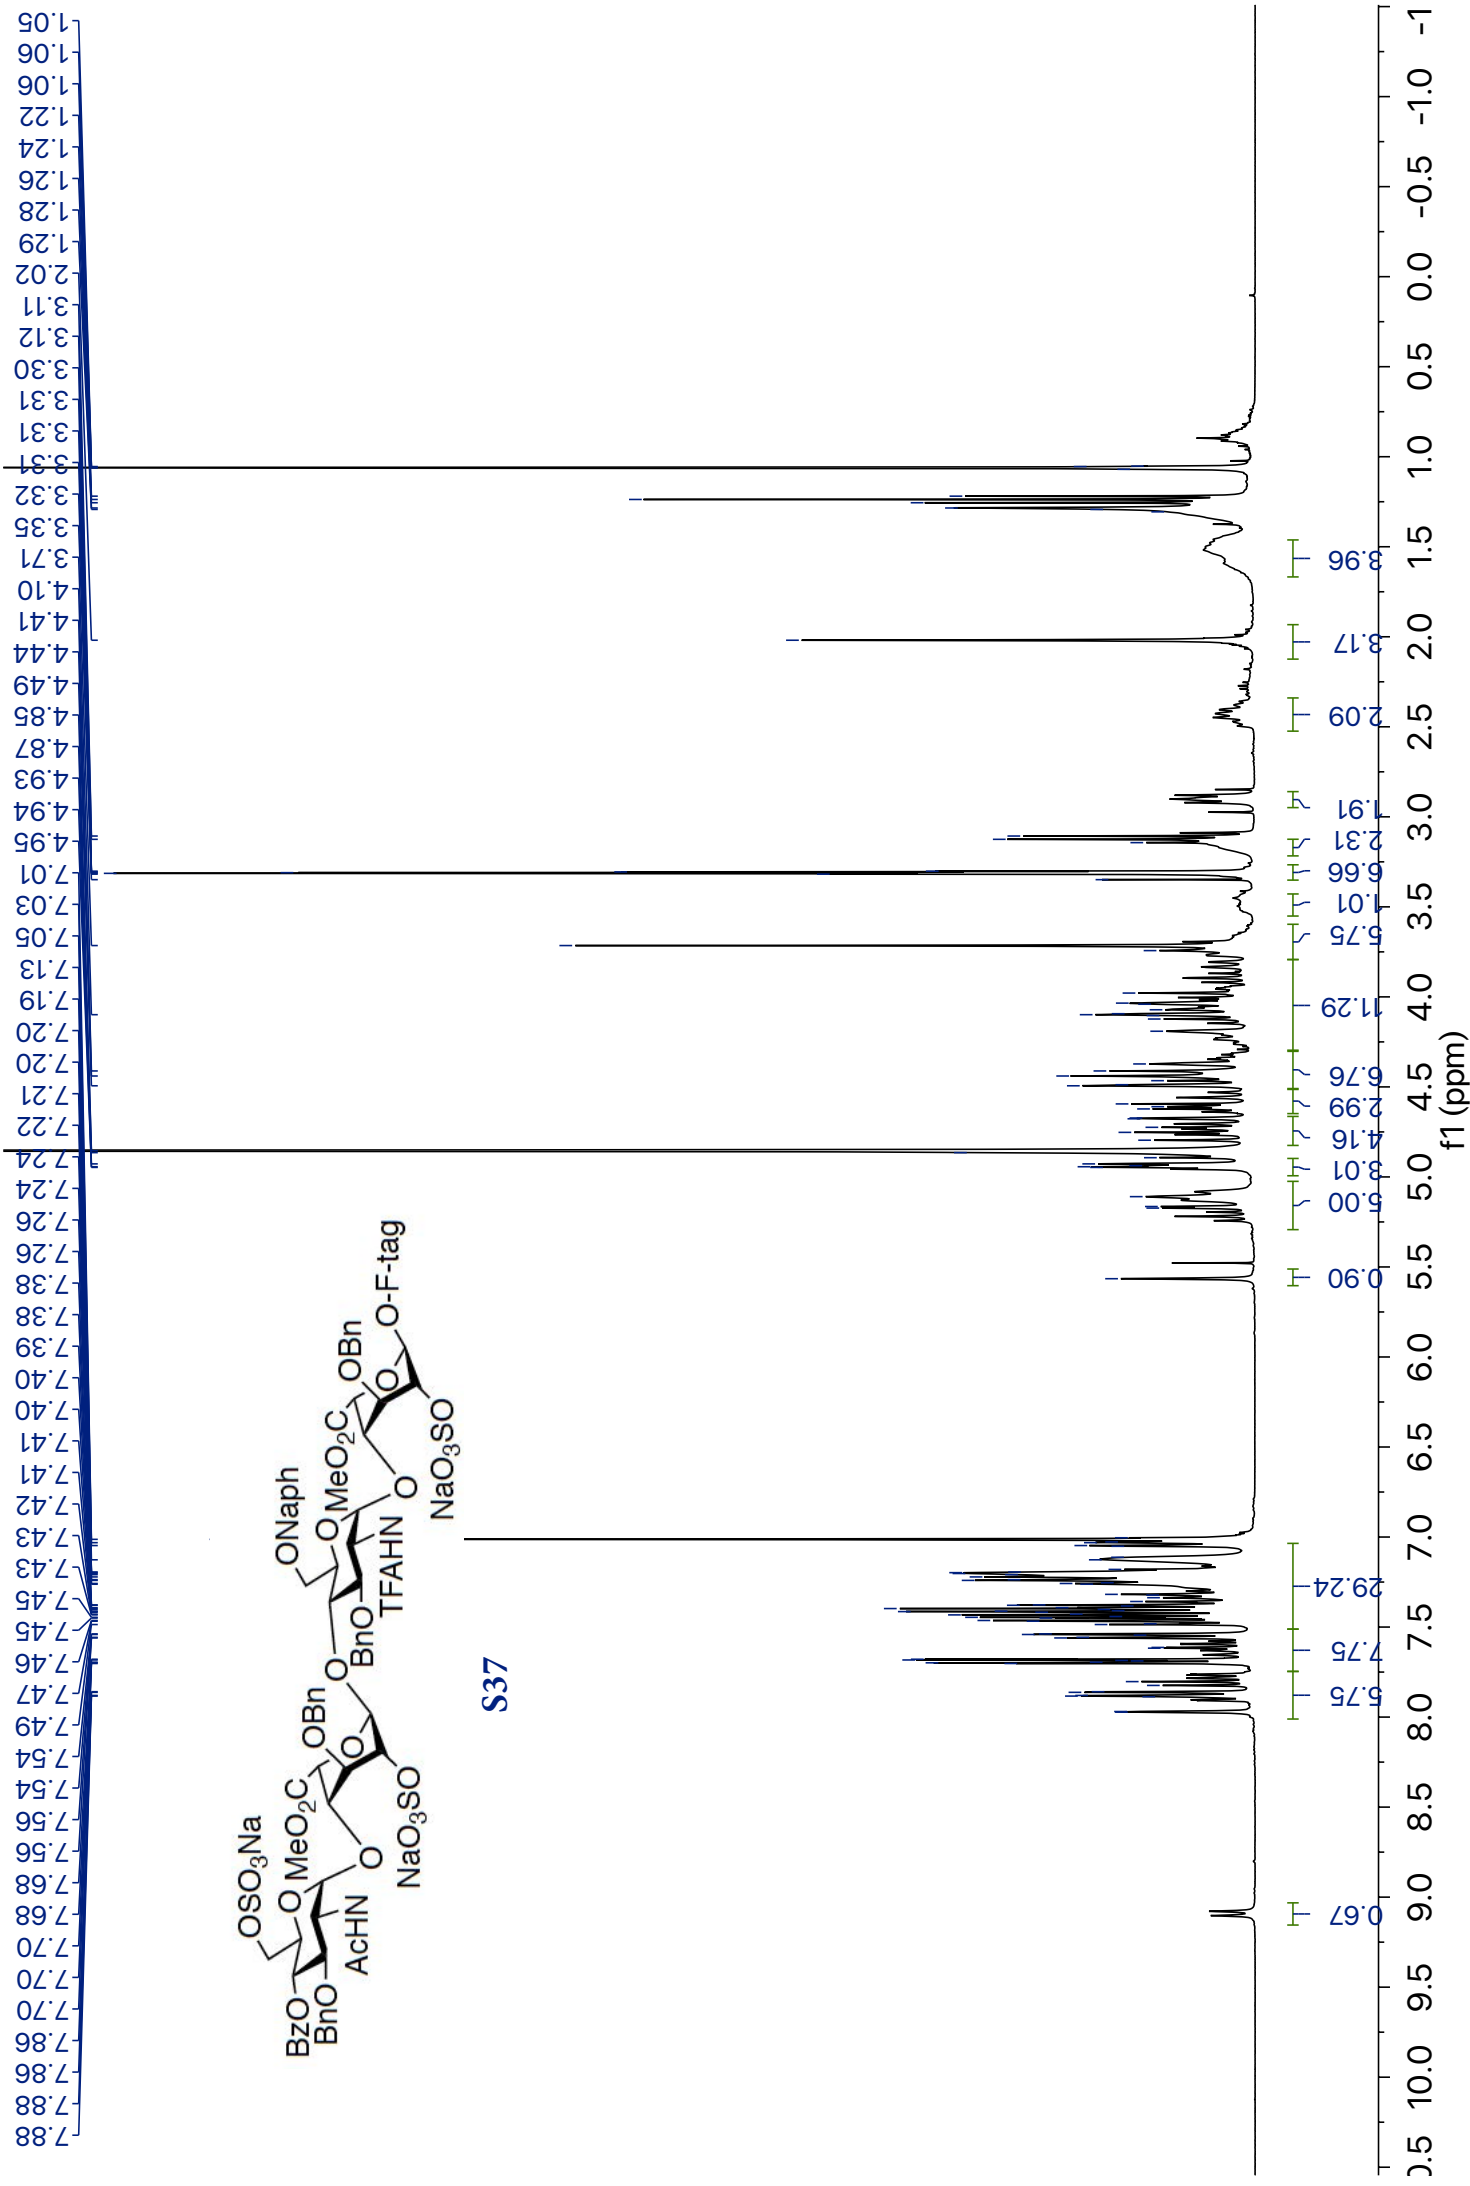

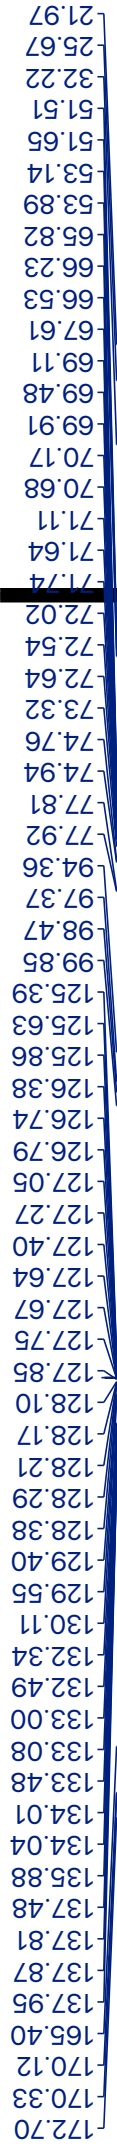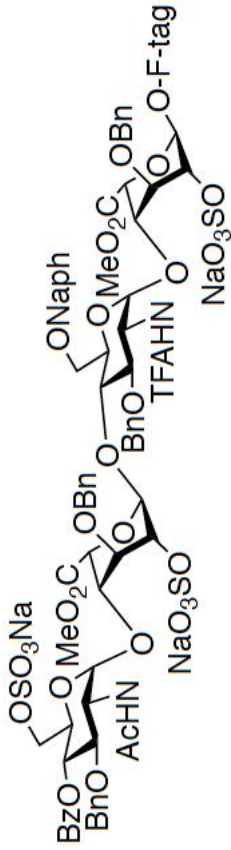

S37

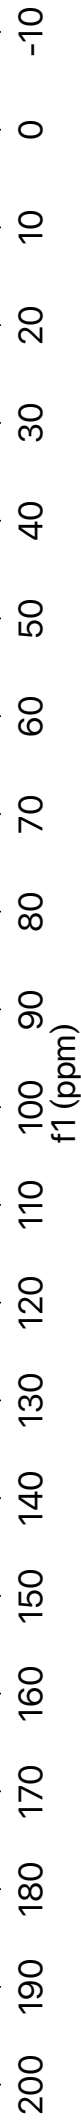







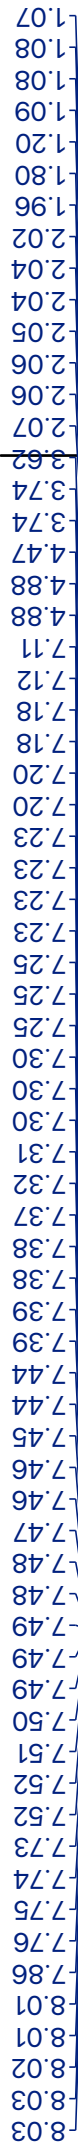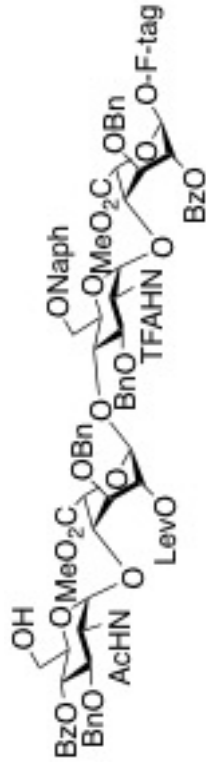

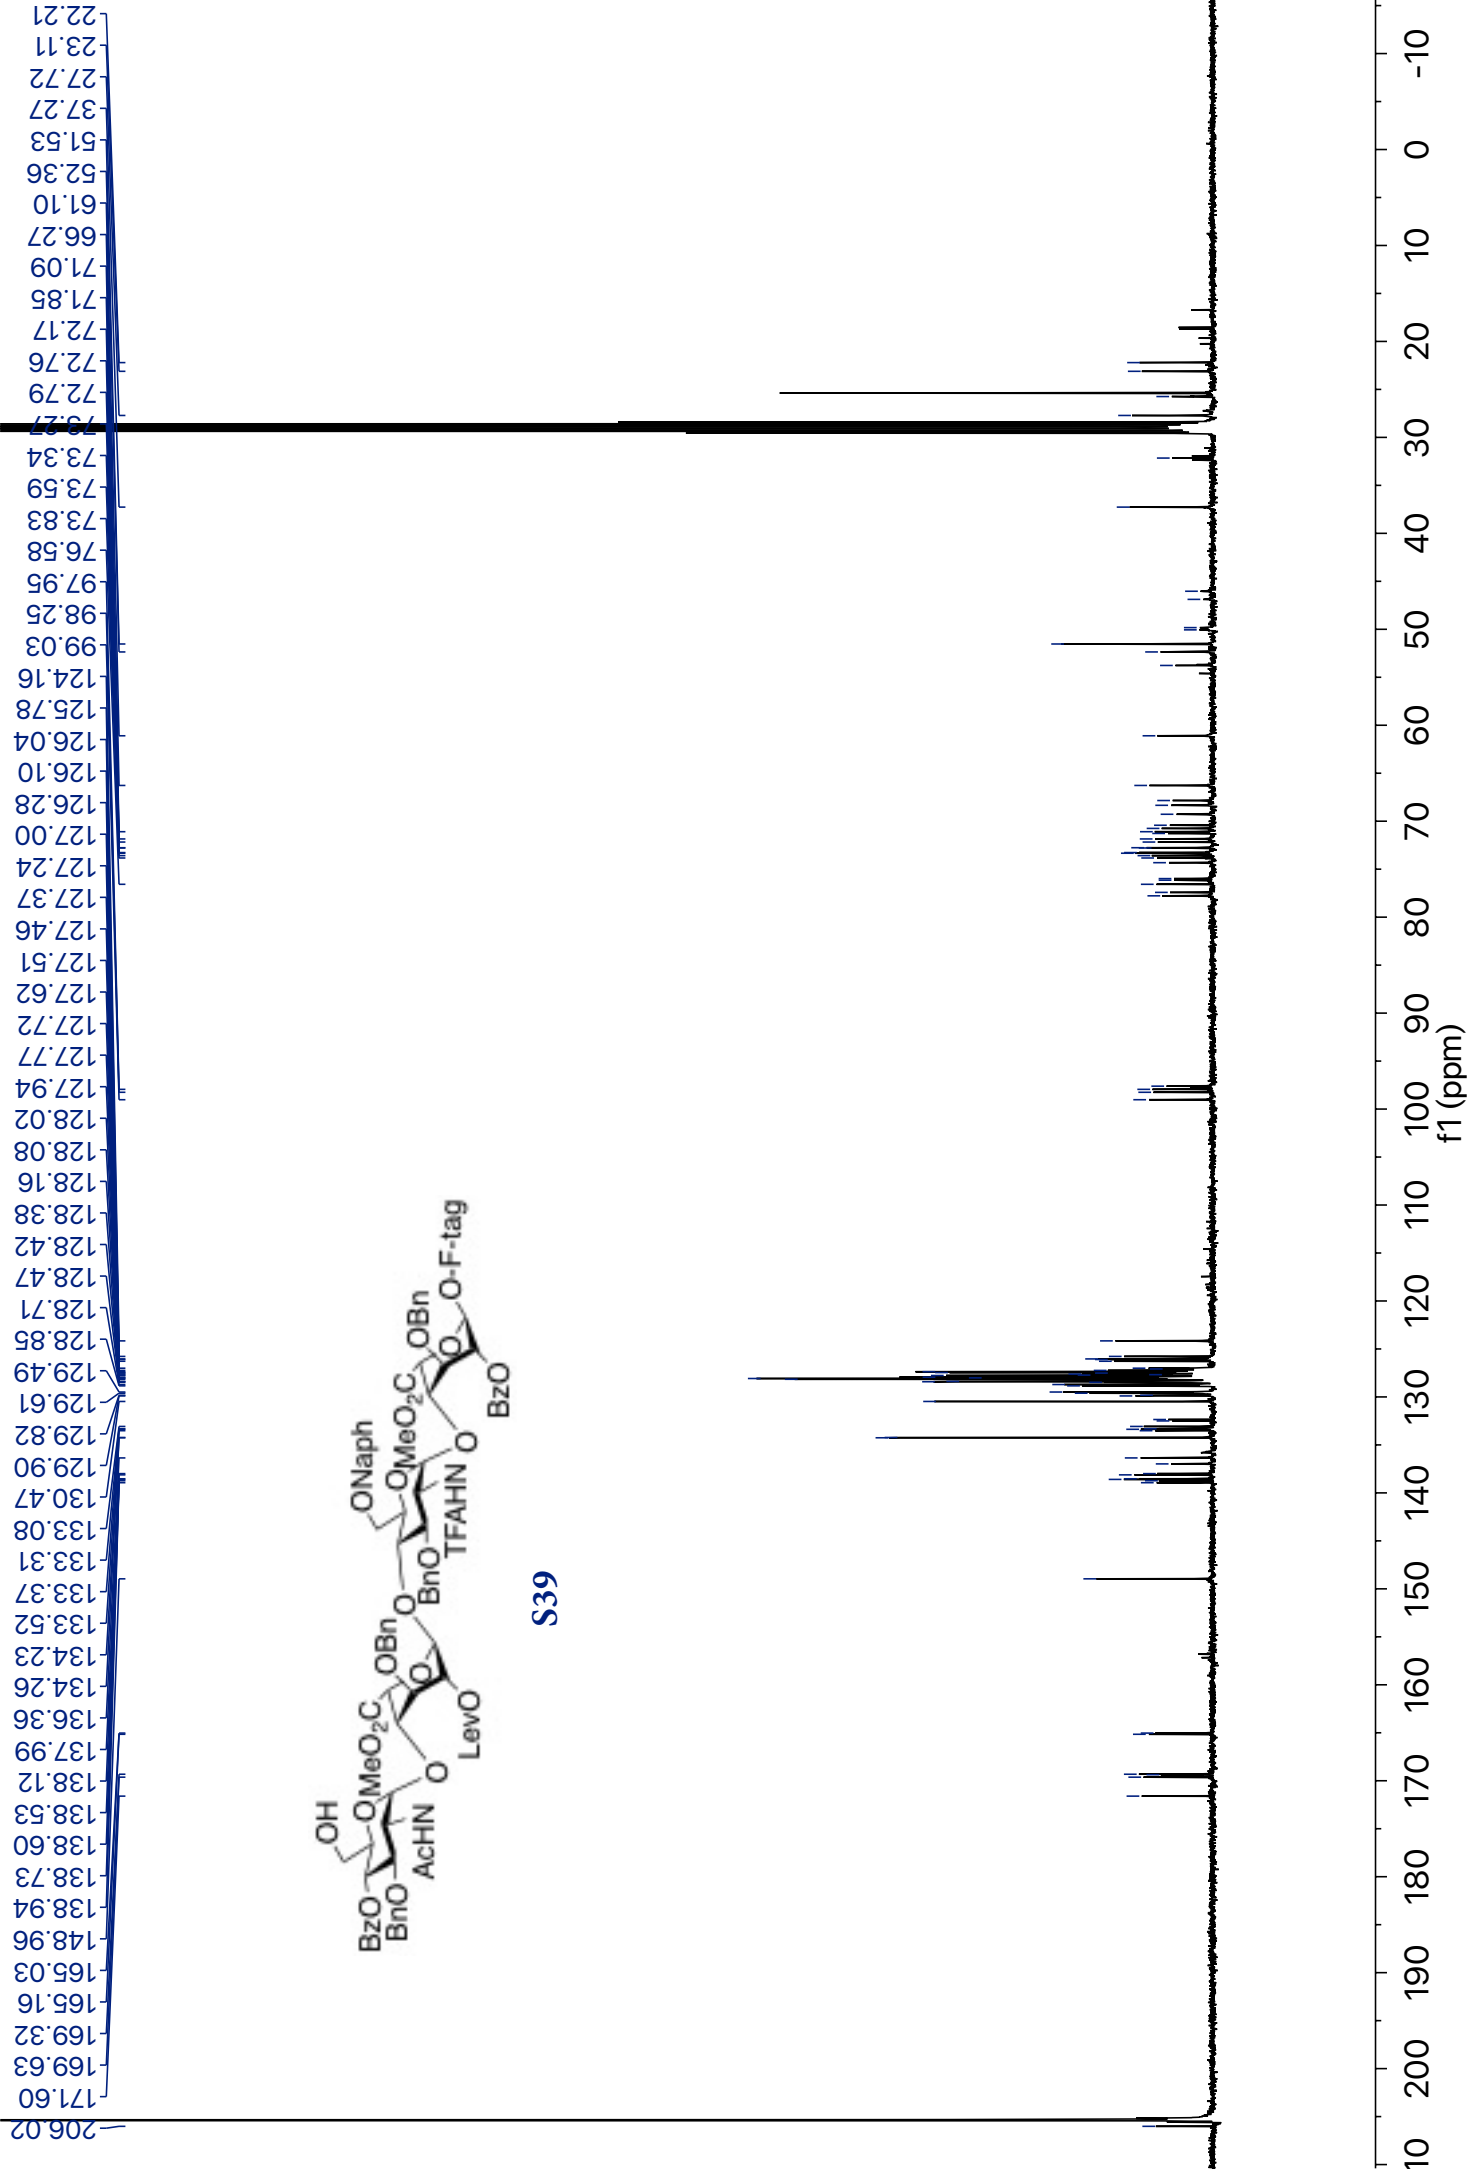



WL-2-157-DeNap-C.1.1.1r —

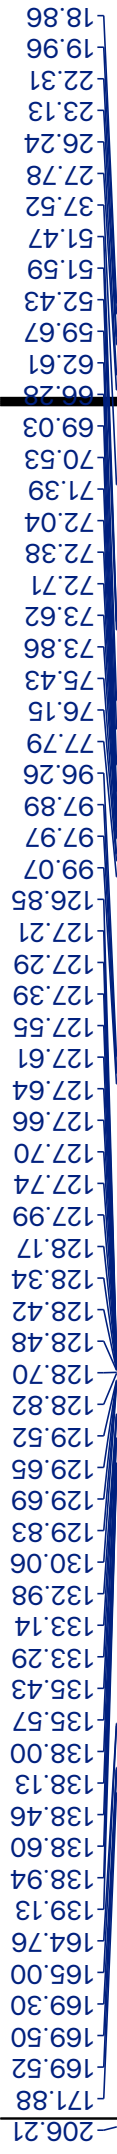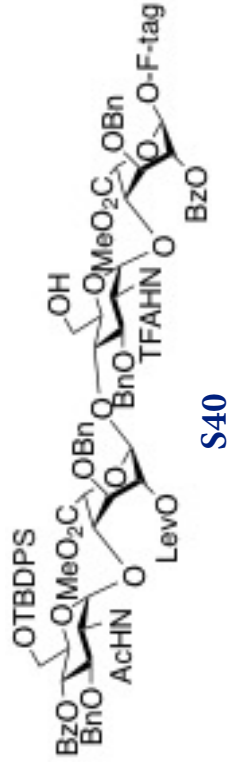

S40

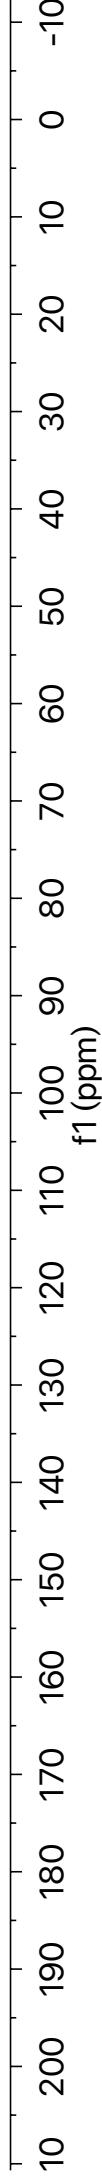



WL-2-158-B-6-sulfation-C.2.1.1r —

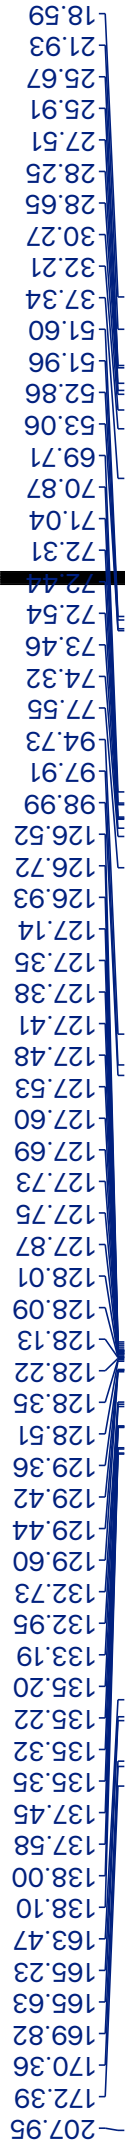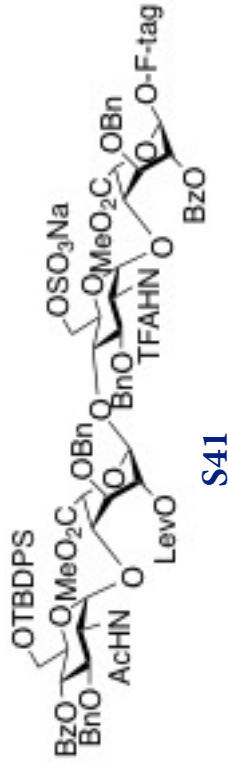

S41

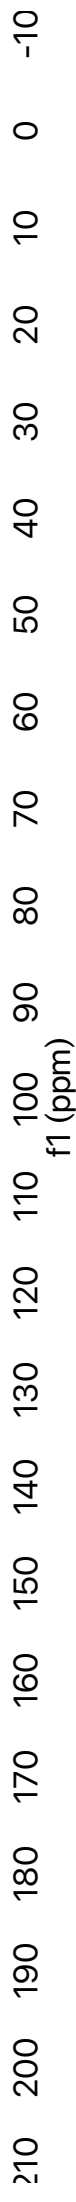



Wt-% 107 De-Nap-NA-C-De-FBPS-1  
 206.47  
 205.51  
 205.31  
 171.78  
 170.08  
 169.55  
 169.14  
 164.99  
 139.08  
 138.98  
 138.86  
 138.80  
 138.00  
 133.29  
 129.92  
 129.82  
 129.62  
 129.50  
 128.83  
 128.70  
 128.47  
 128.41  
 128.36  
 128.16  
 127.96  
 127.84  
 127.71  
 127.67  
 127.55  
 127.53  
 127.43  
 127.37  
 127.25  
 126.94  
 99.06  
 98.08  
 97.91  
 96.89  
 77.66  
 76.68  
 76.17  
 75.90  
 74.03  
 73.62  
 73.17  
 72.76  
 72.70  
 72.06  
 71.73  
 71.65  
 71.07  
 66.27  
 59.66  
 54.08  
 52.43  
 51.57  
 51.51  
 37.49  
 27.79  
 25.74  
 23.12  
 22.27  
 19.94  
 13.62

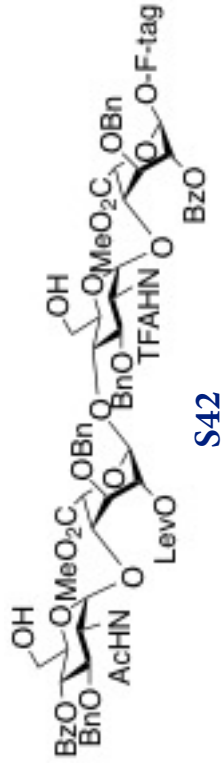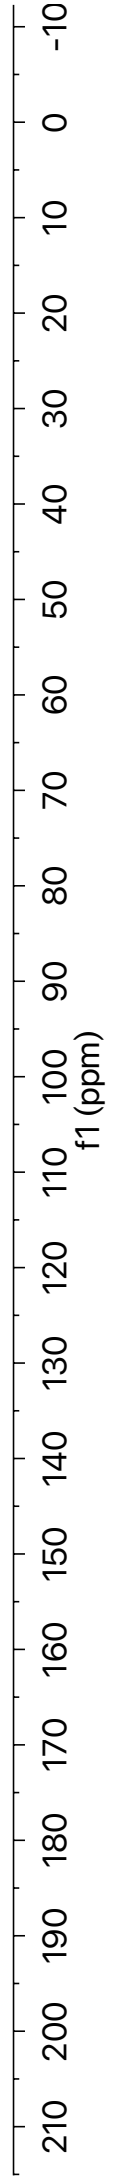



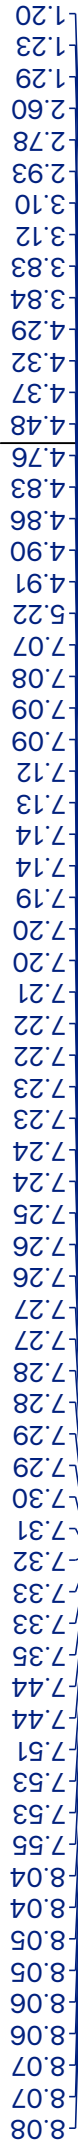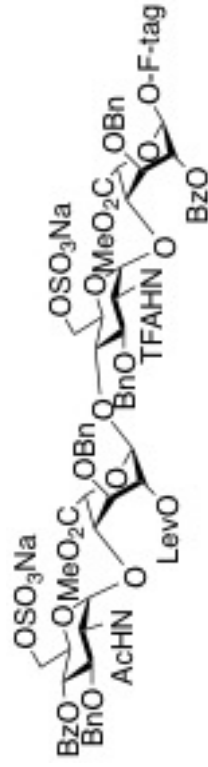

S43

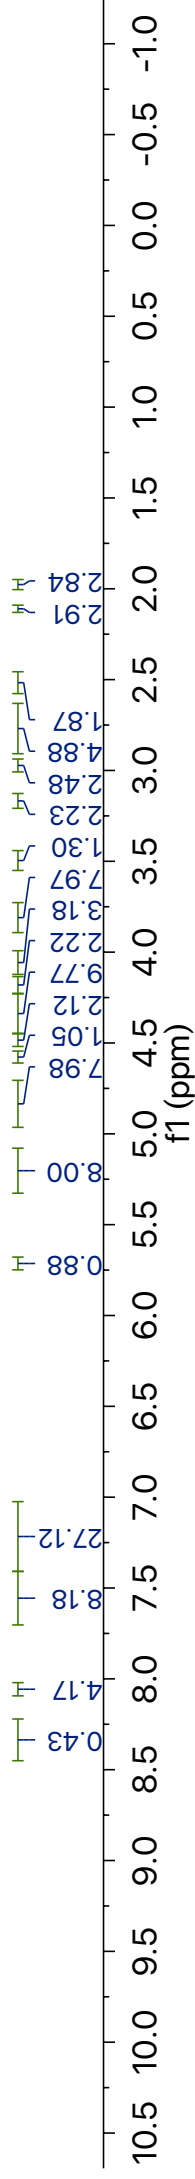

WL-2-108-D-6SO3-NAc-B-6SO3-C.1.1.r

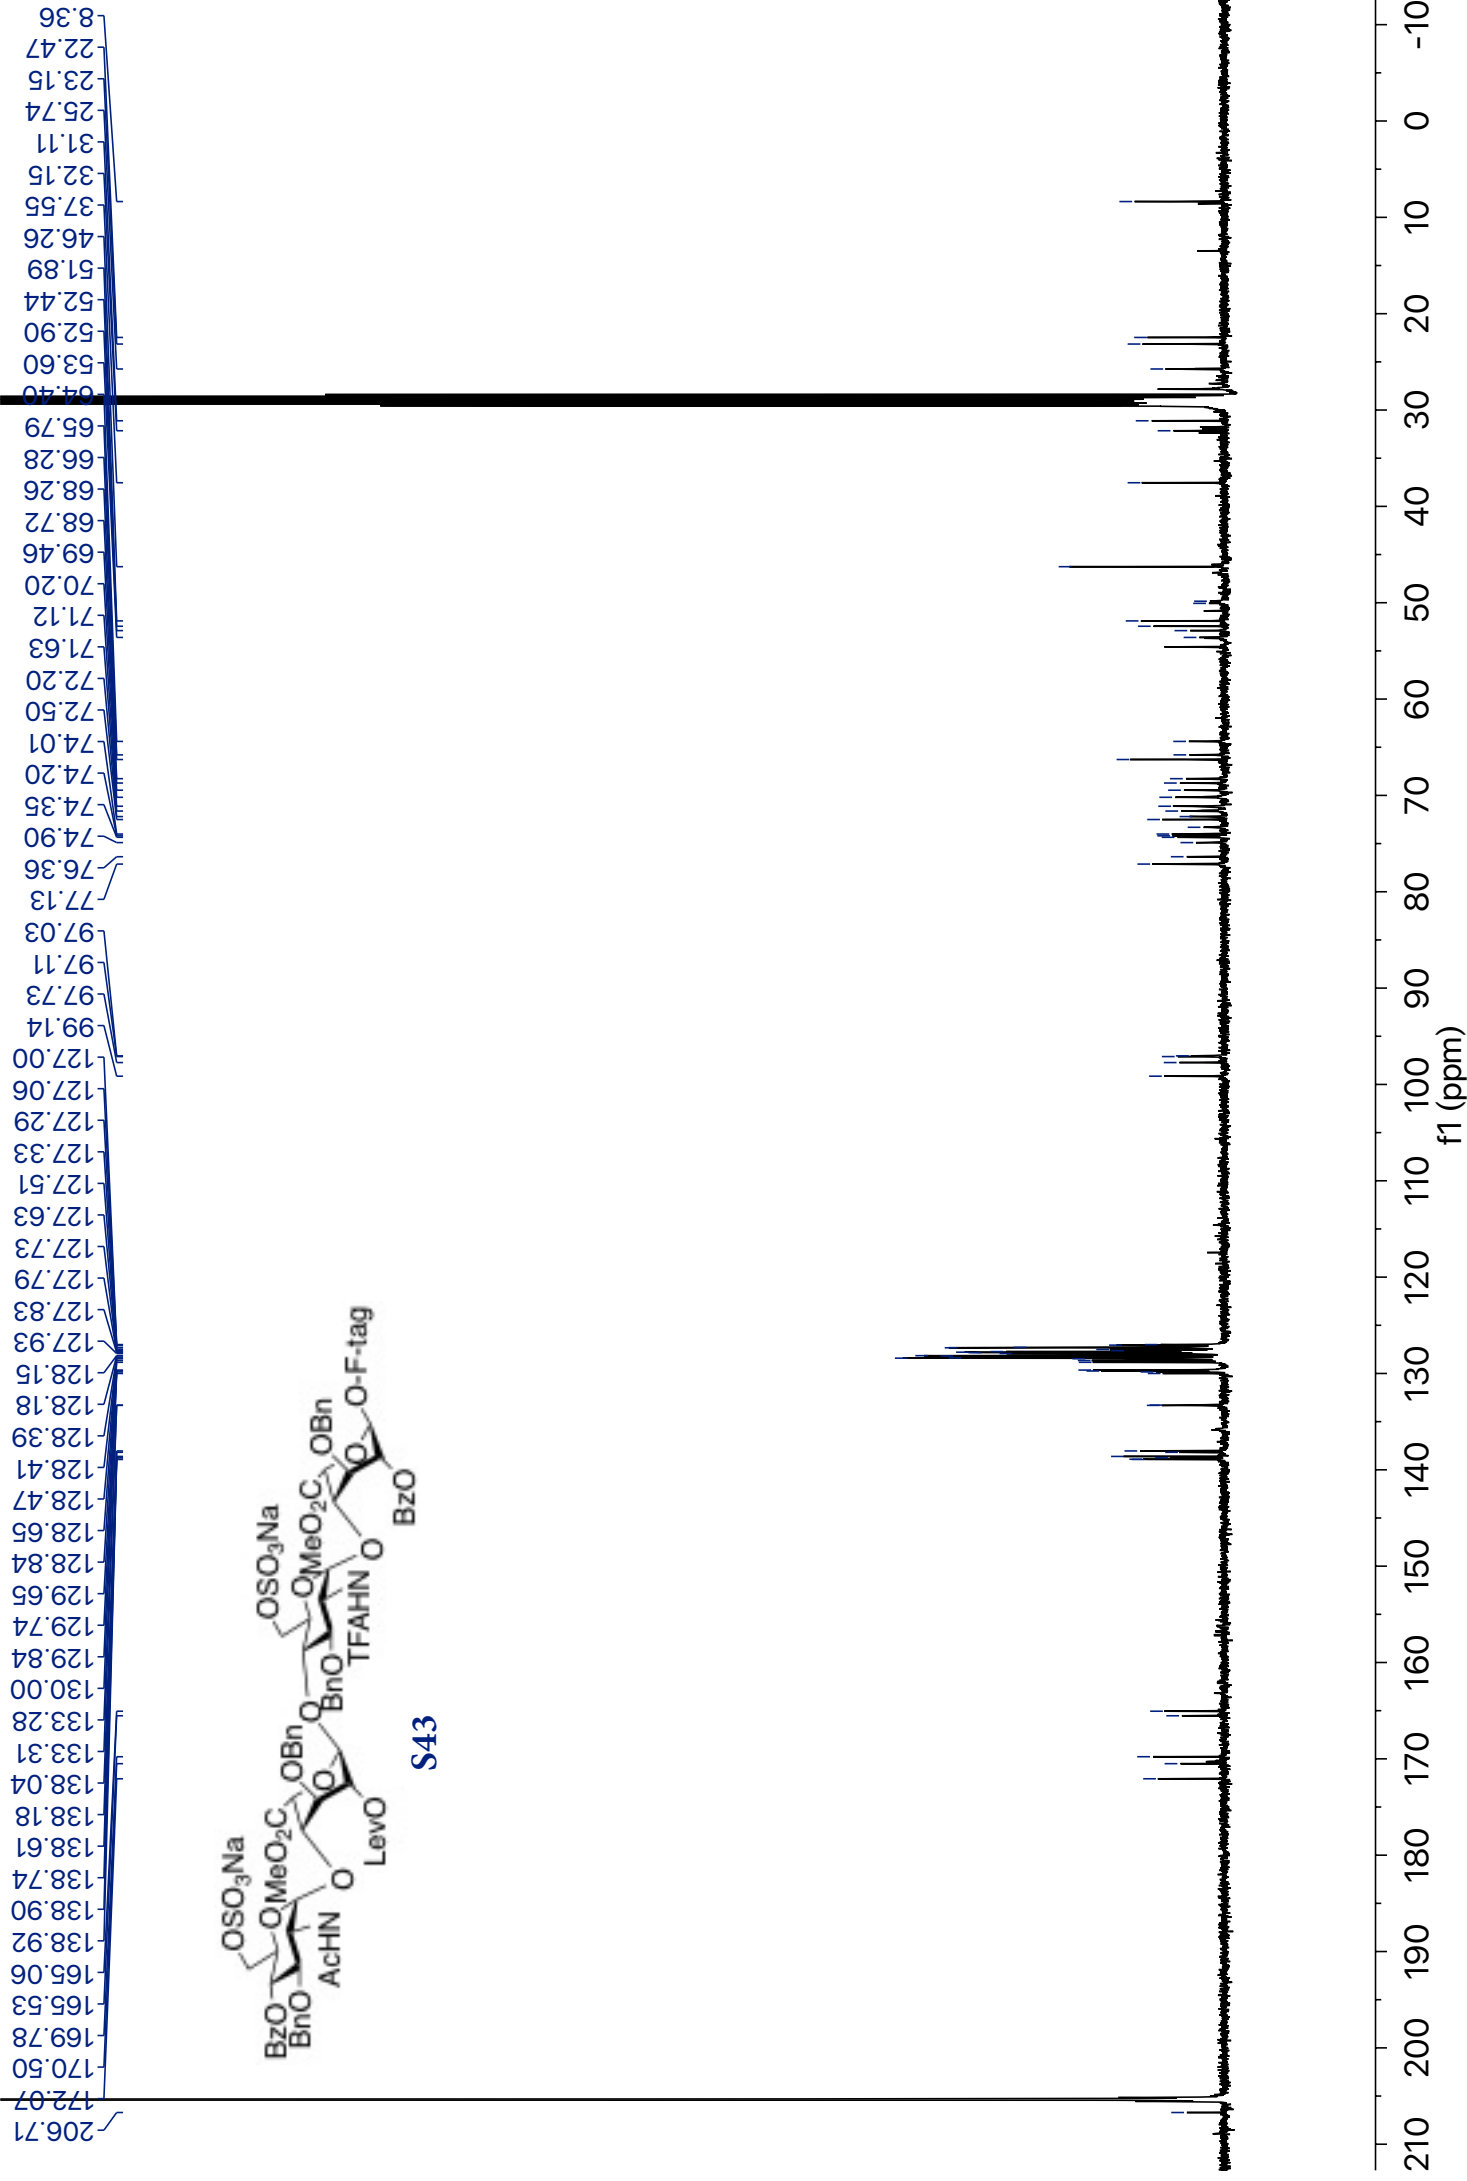





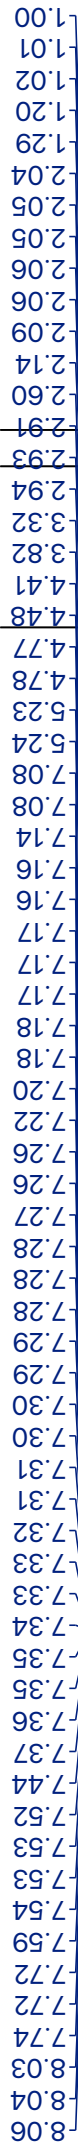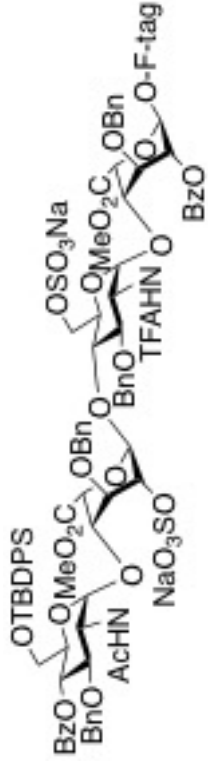

S45

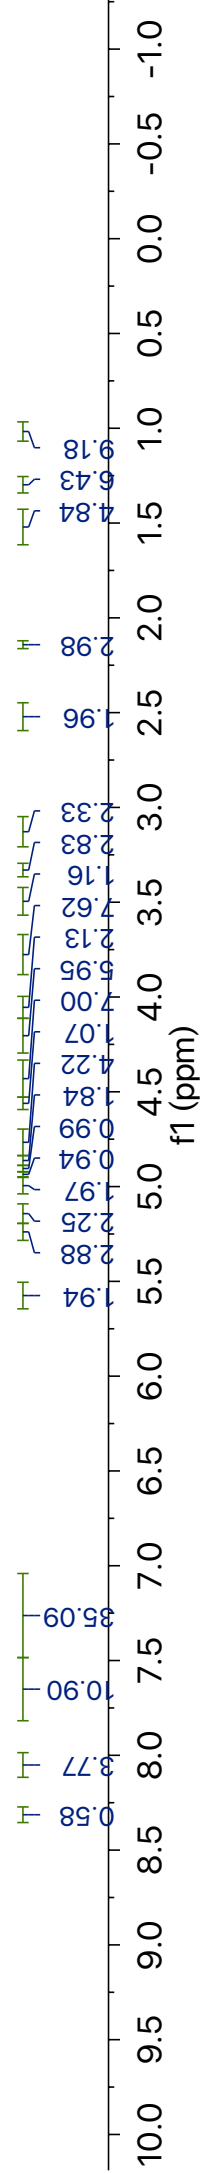



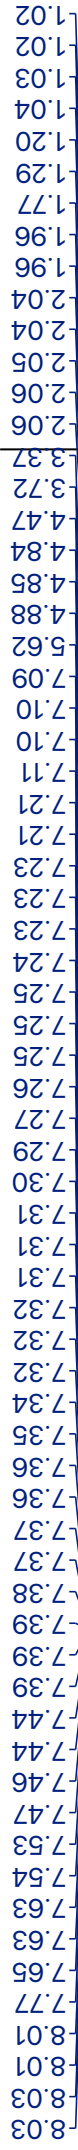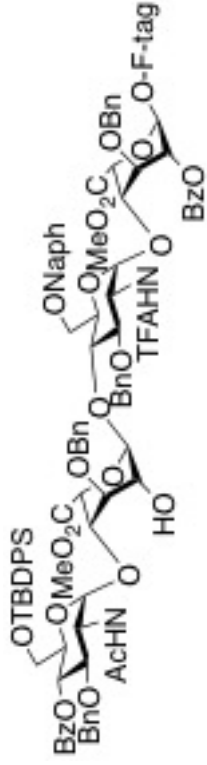

S46

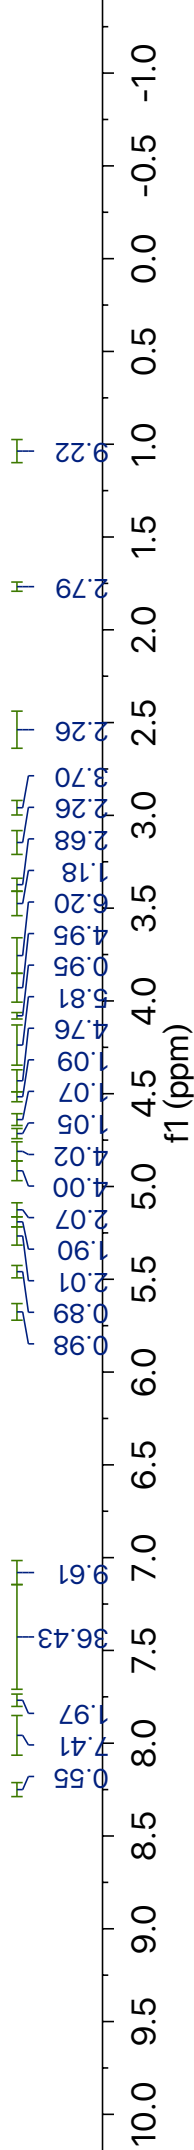

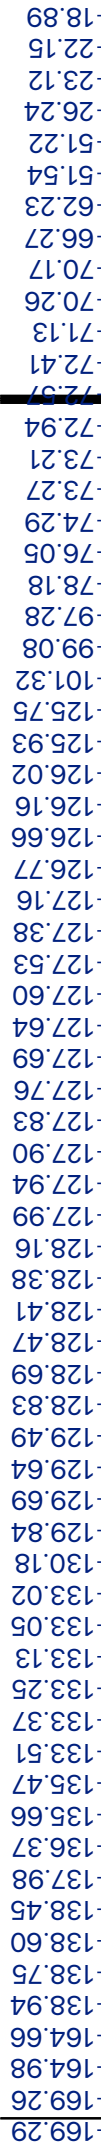

169.29  
169.26  
164.98  
164.66  
138.94  
138.75  
138.60  
138.45  
137.98  
136.37  
135.66  
135.47  
133.51  
133.37  
133.25  
133.13  
133.05  
133.02  
130.18  
129.84  
129.69  
129.64  
129.49  
128.83  
128.69  
128.47  
128.41  
128.38  
128.16  
127.99  
127.94  
127.90  
127.83  
127.76  
127.69  
127.64  
127.60  
127.53  
127.38  
127.16  
126.77  
126.66  
126.16  
126.02  
125.93  
125.75  
101.32  
99.08  
97.28  
78.18  
76.05  
74.29  
73.27  
73.21  
72.94  
72.57  
72.41  
71.13  
70.26  
70.17  
66.27  
62.23  
51.54  
51.22  
26.24  
23.12  
22.15  
18.89

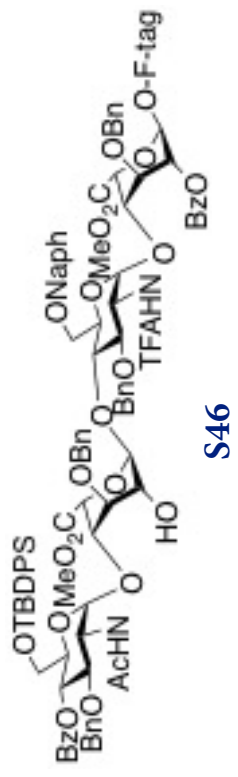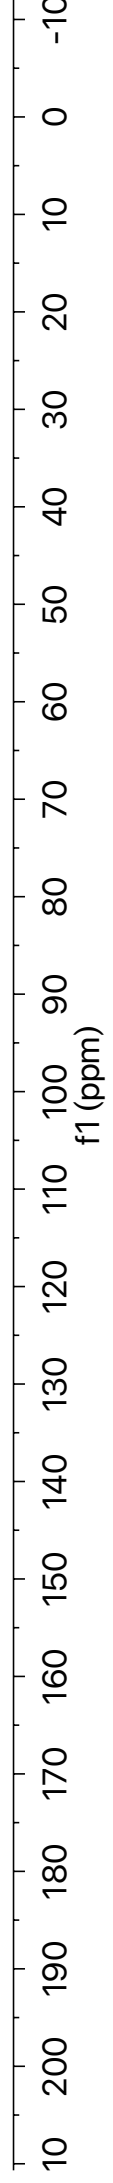





WL-2-160-C-2Sulfation-C.5.1.1r

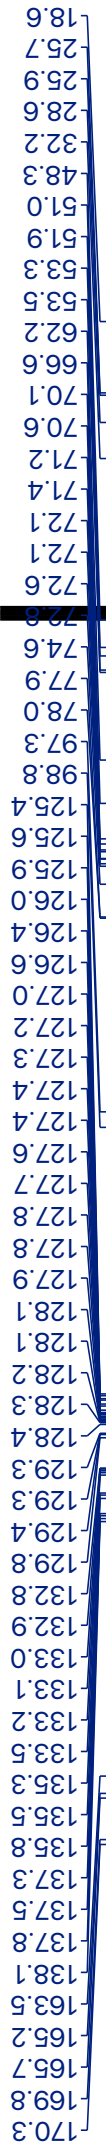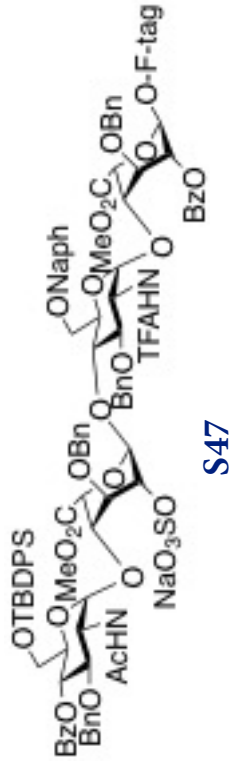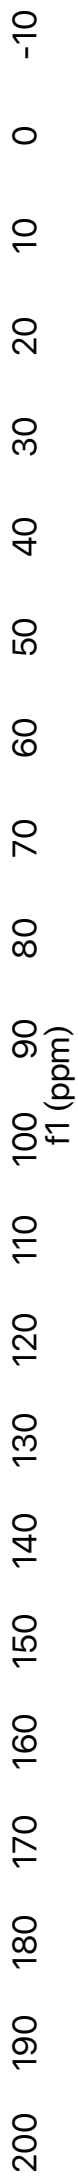



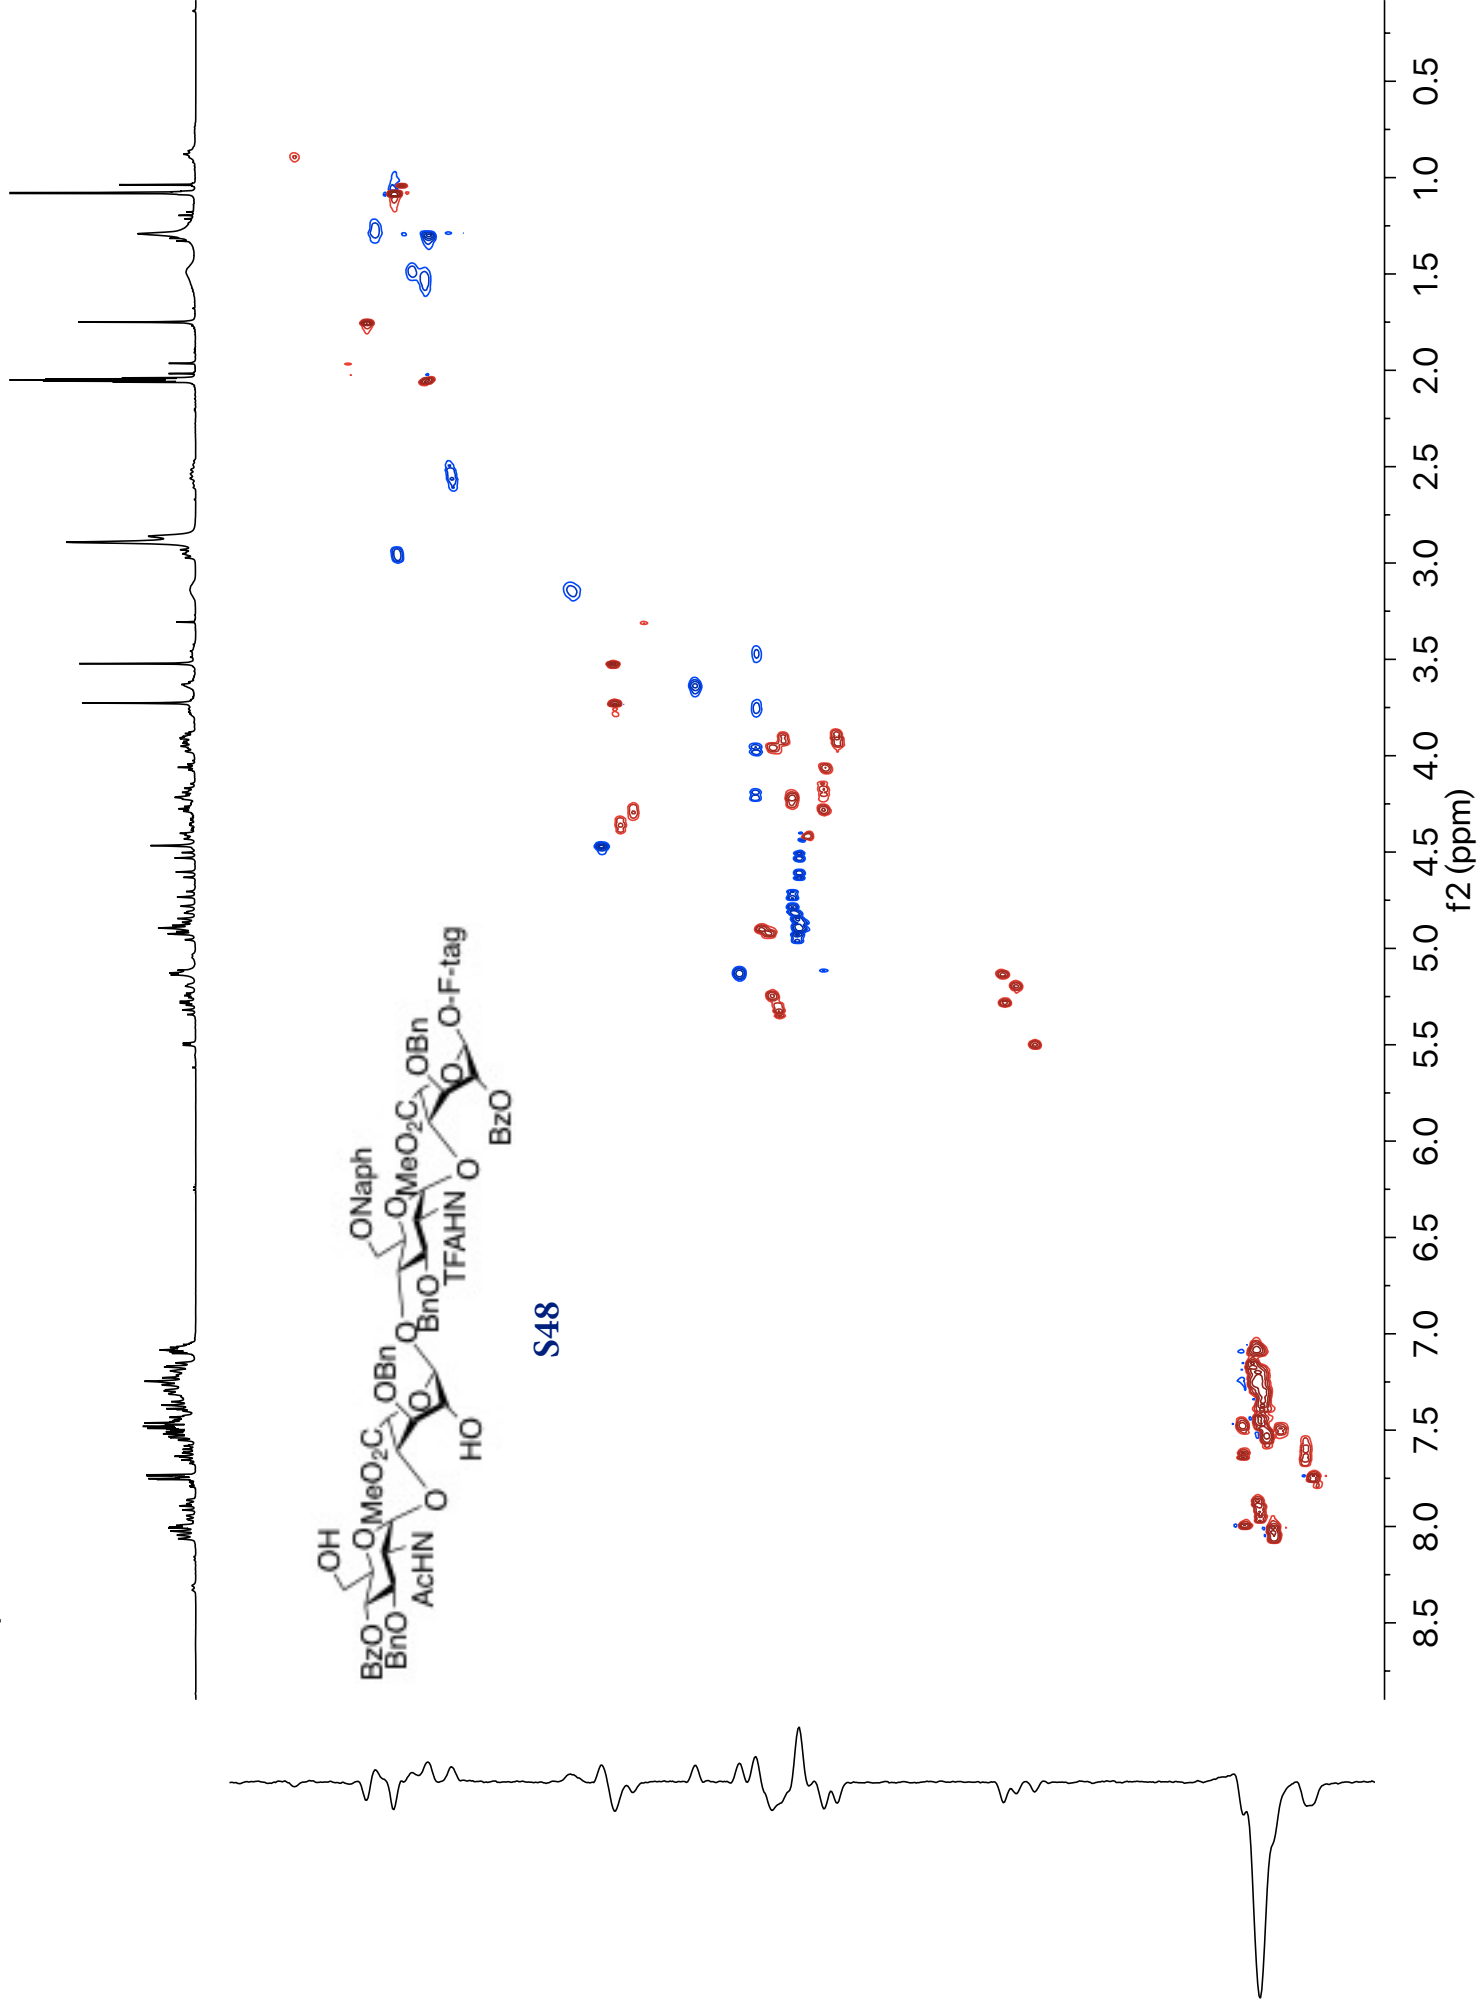

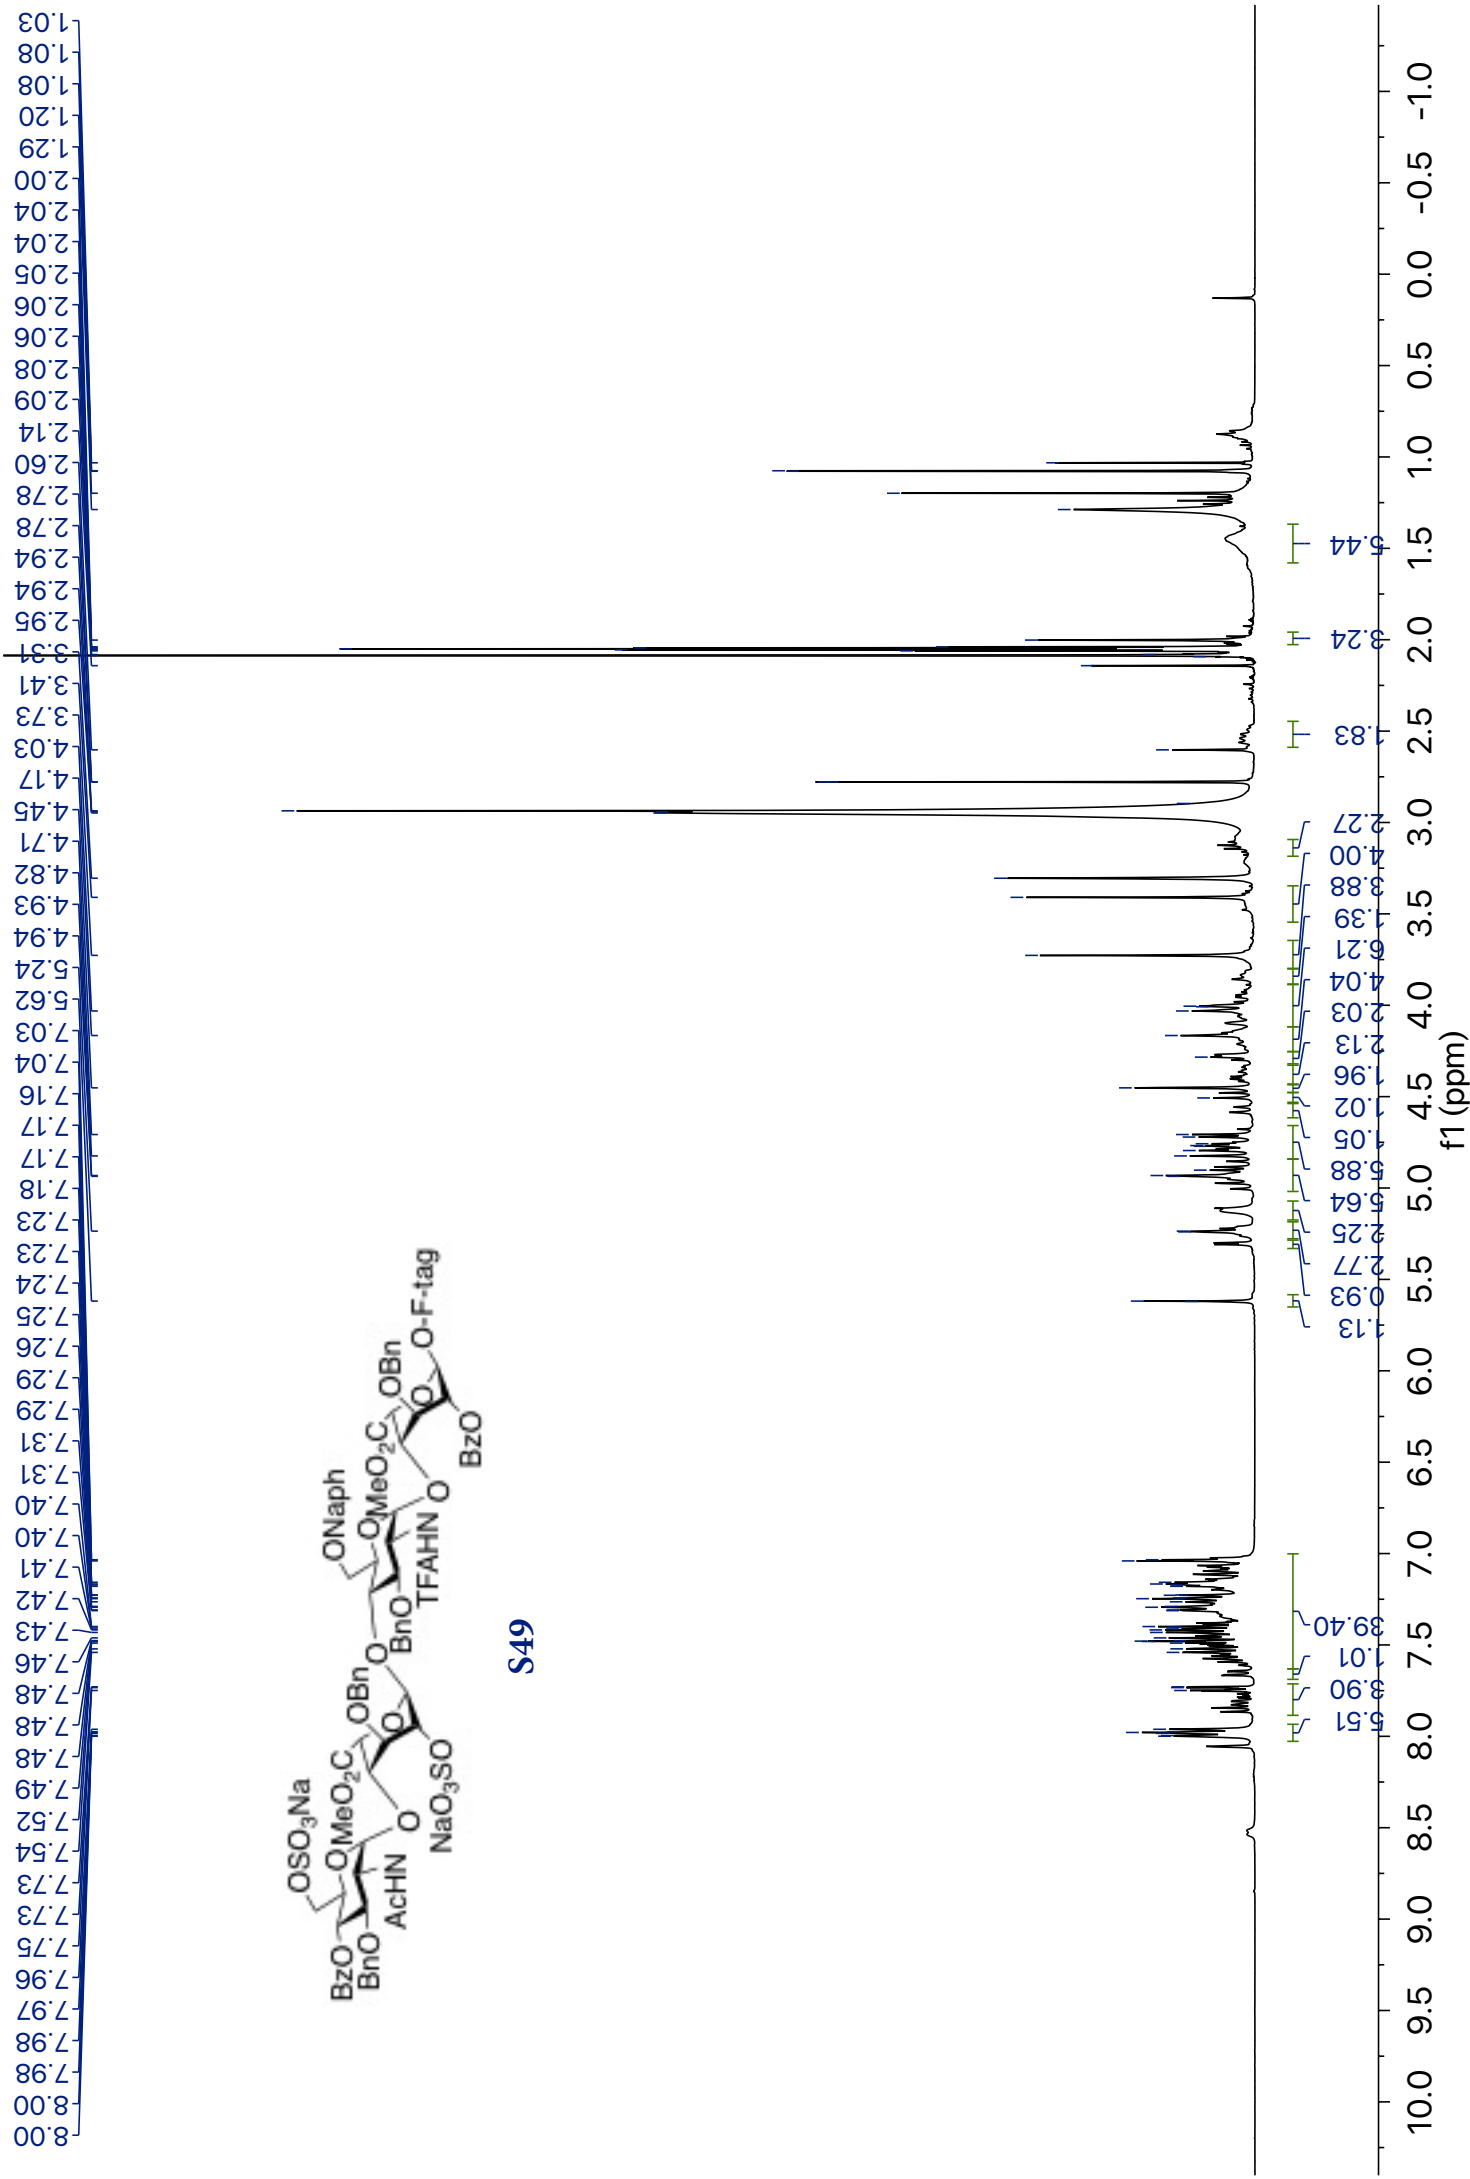

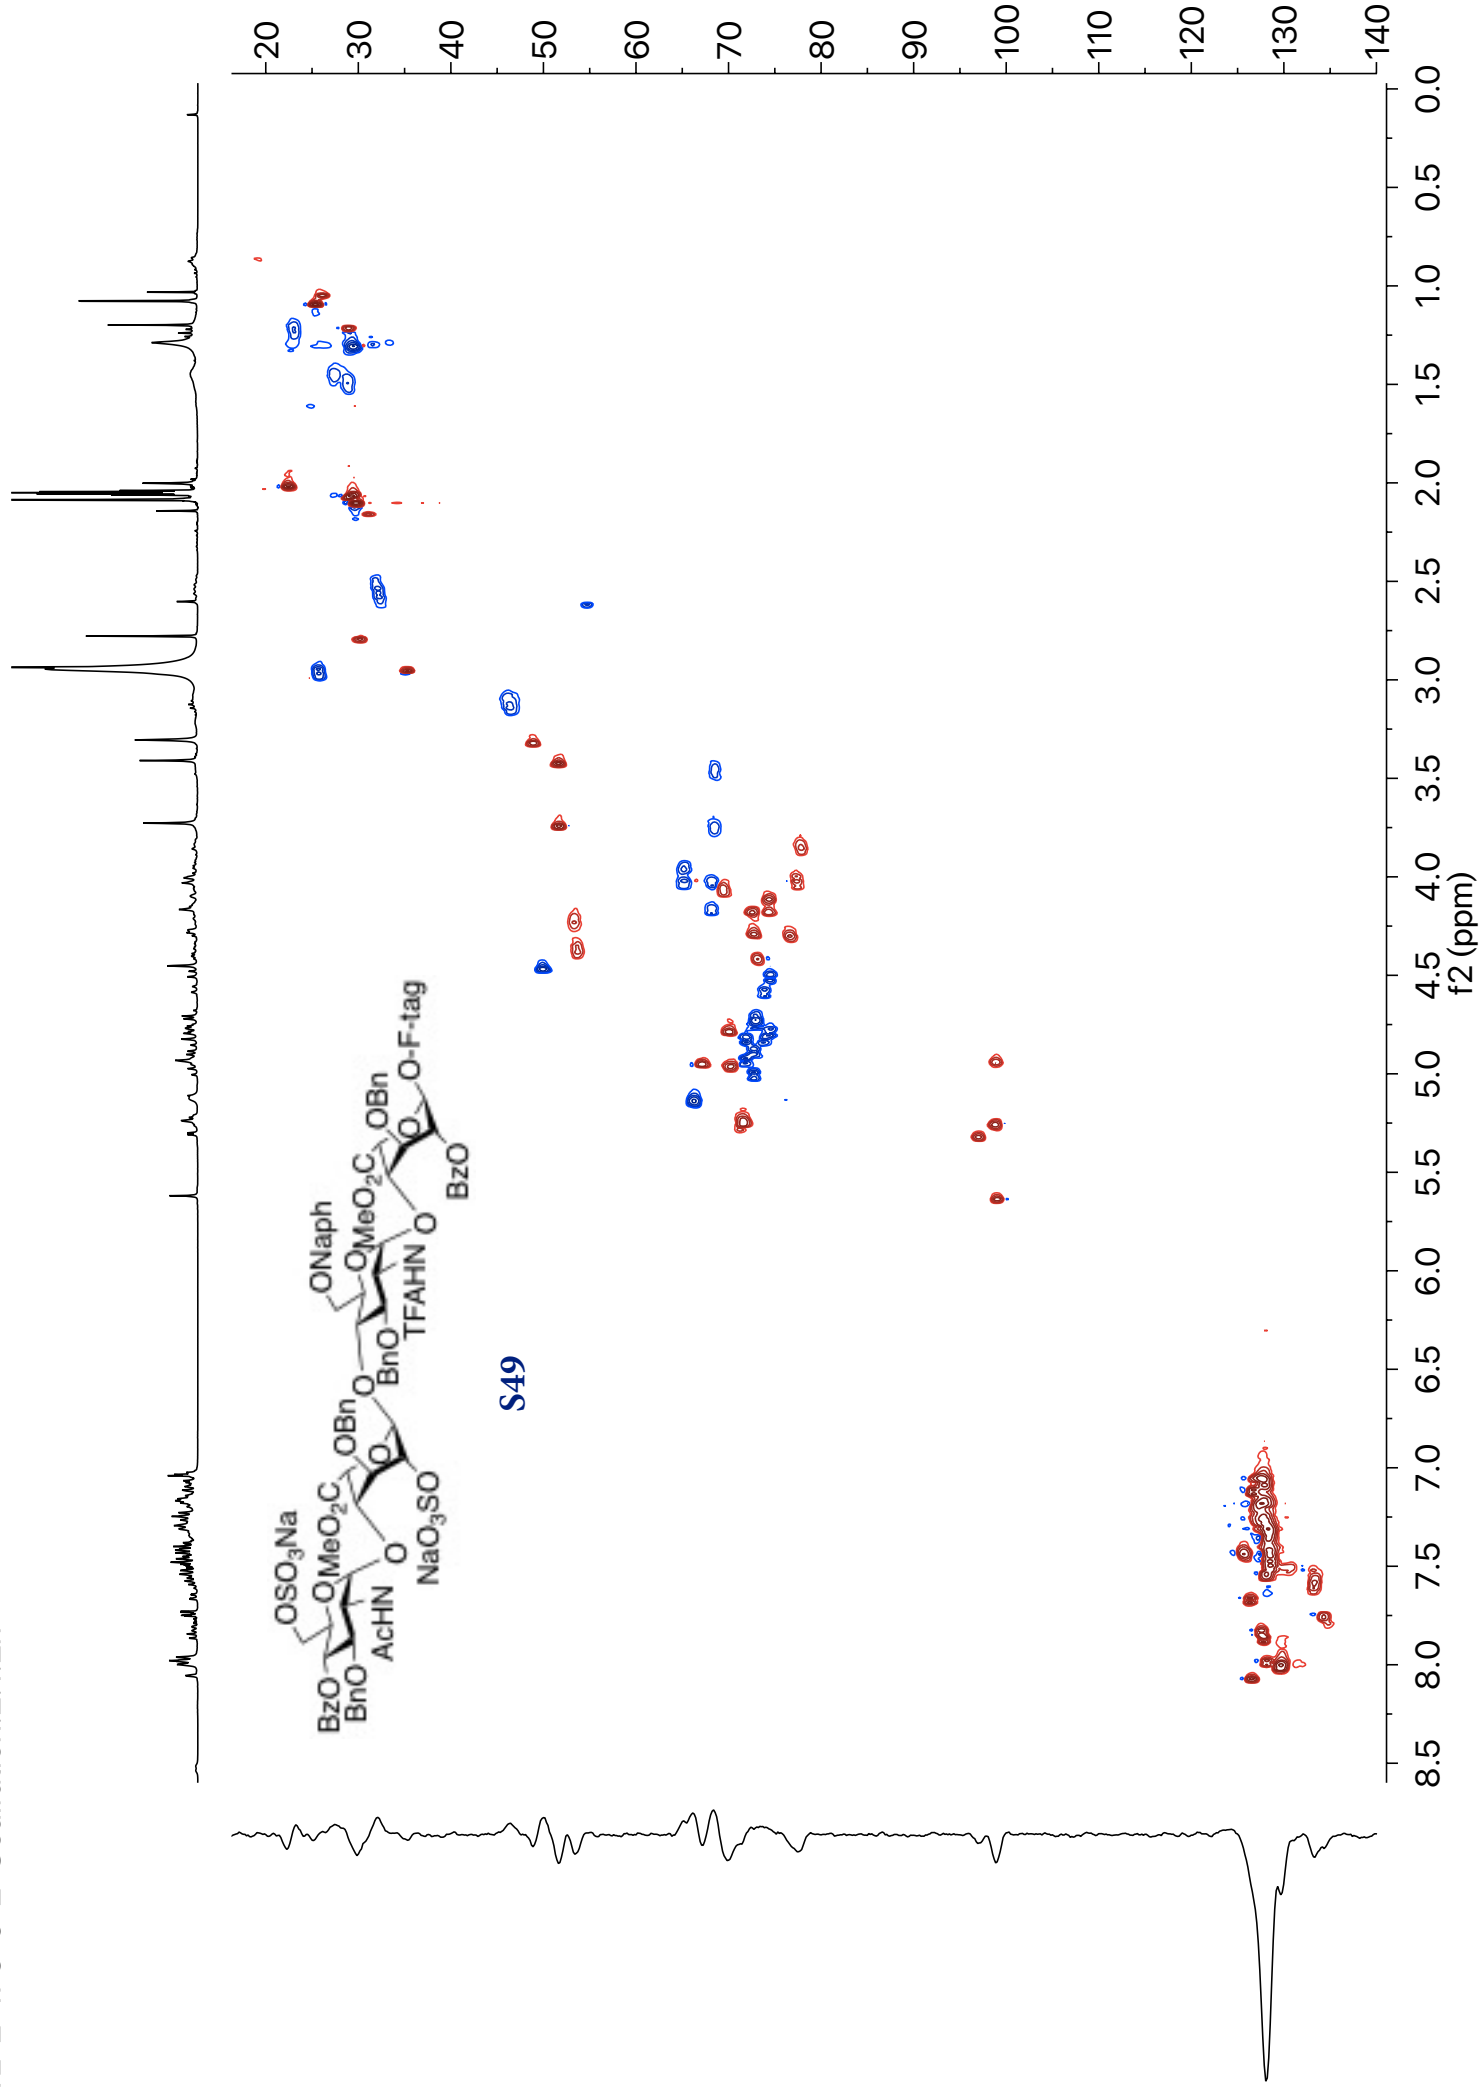

WL-2-210-Bz-Acceptor-Prod-H.3.1r —

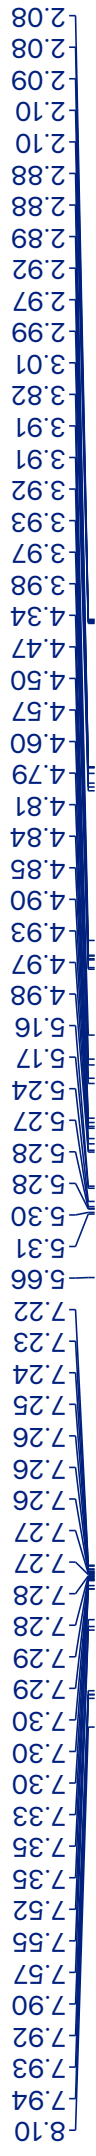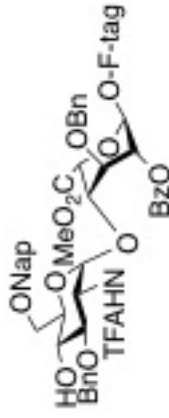

S50

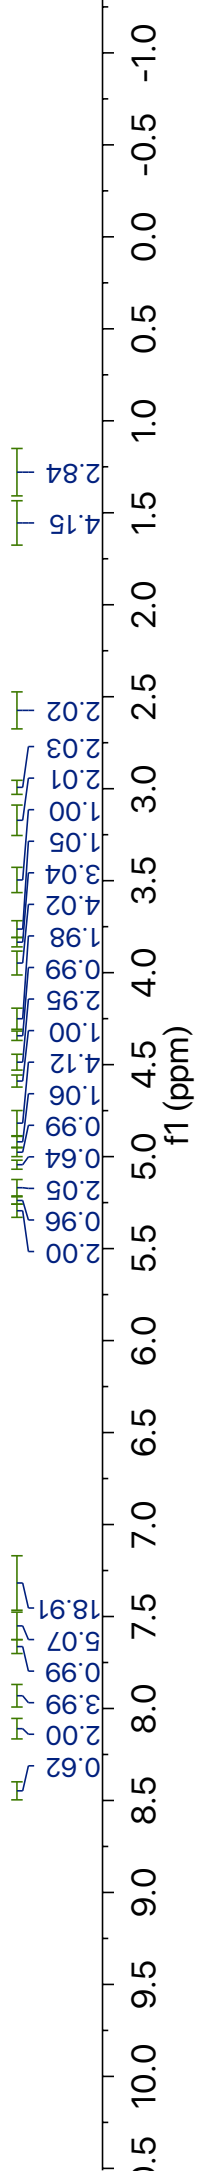

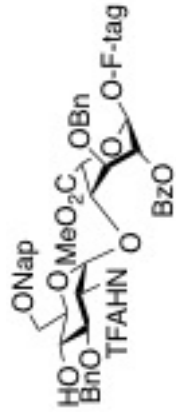

S50

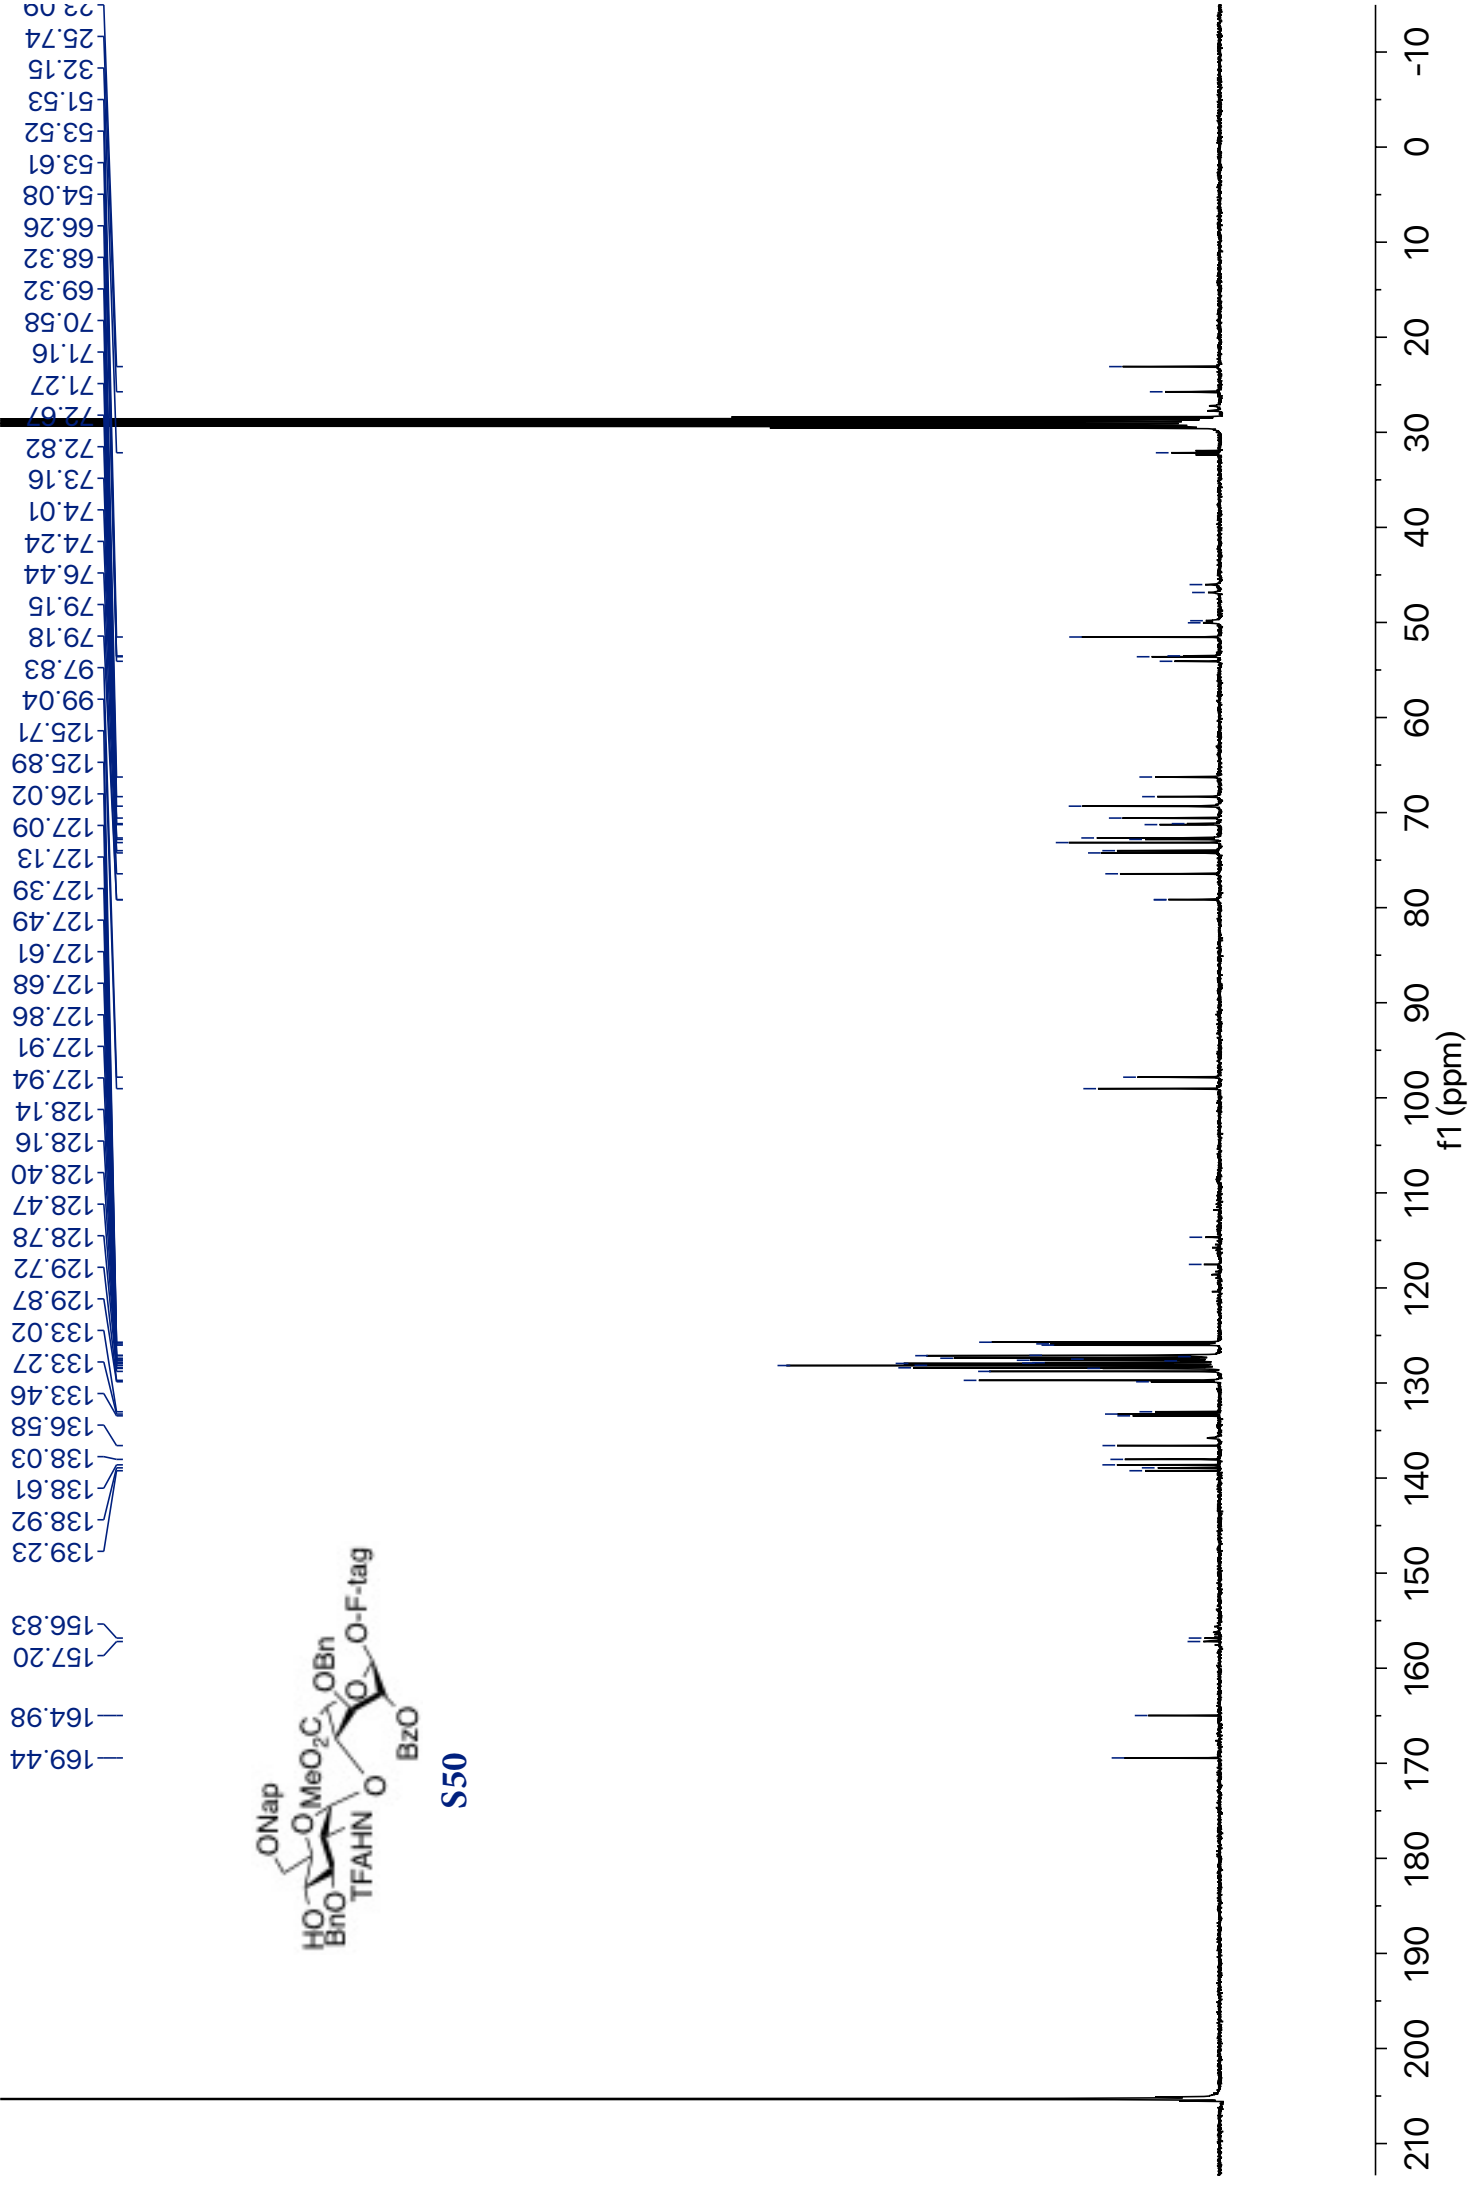



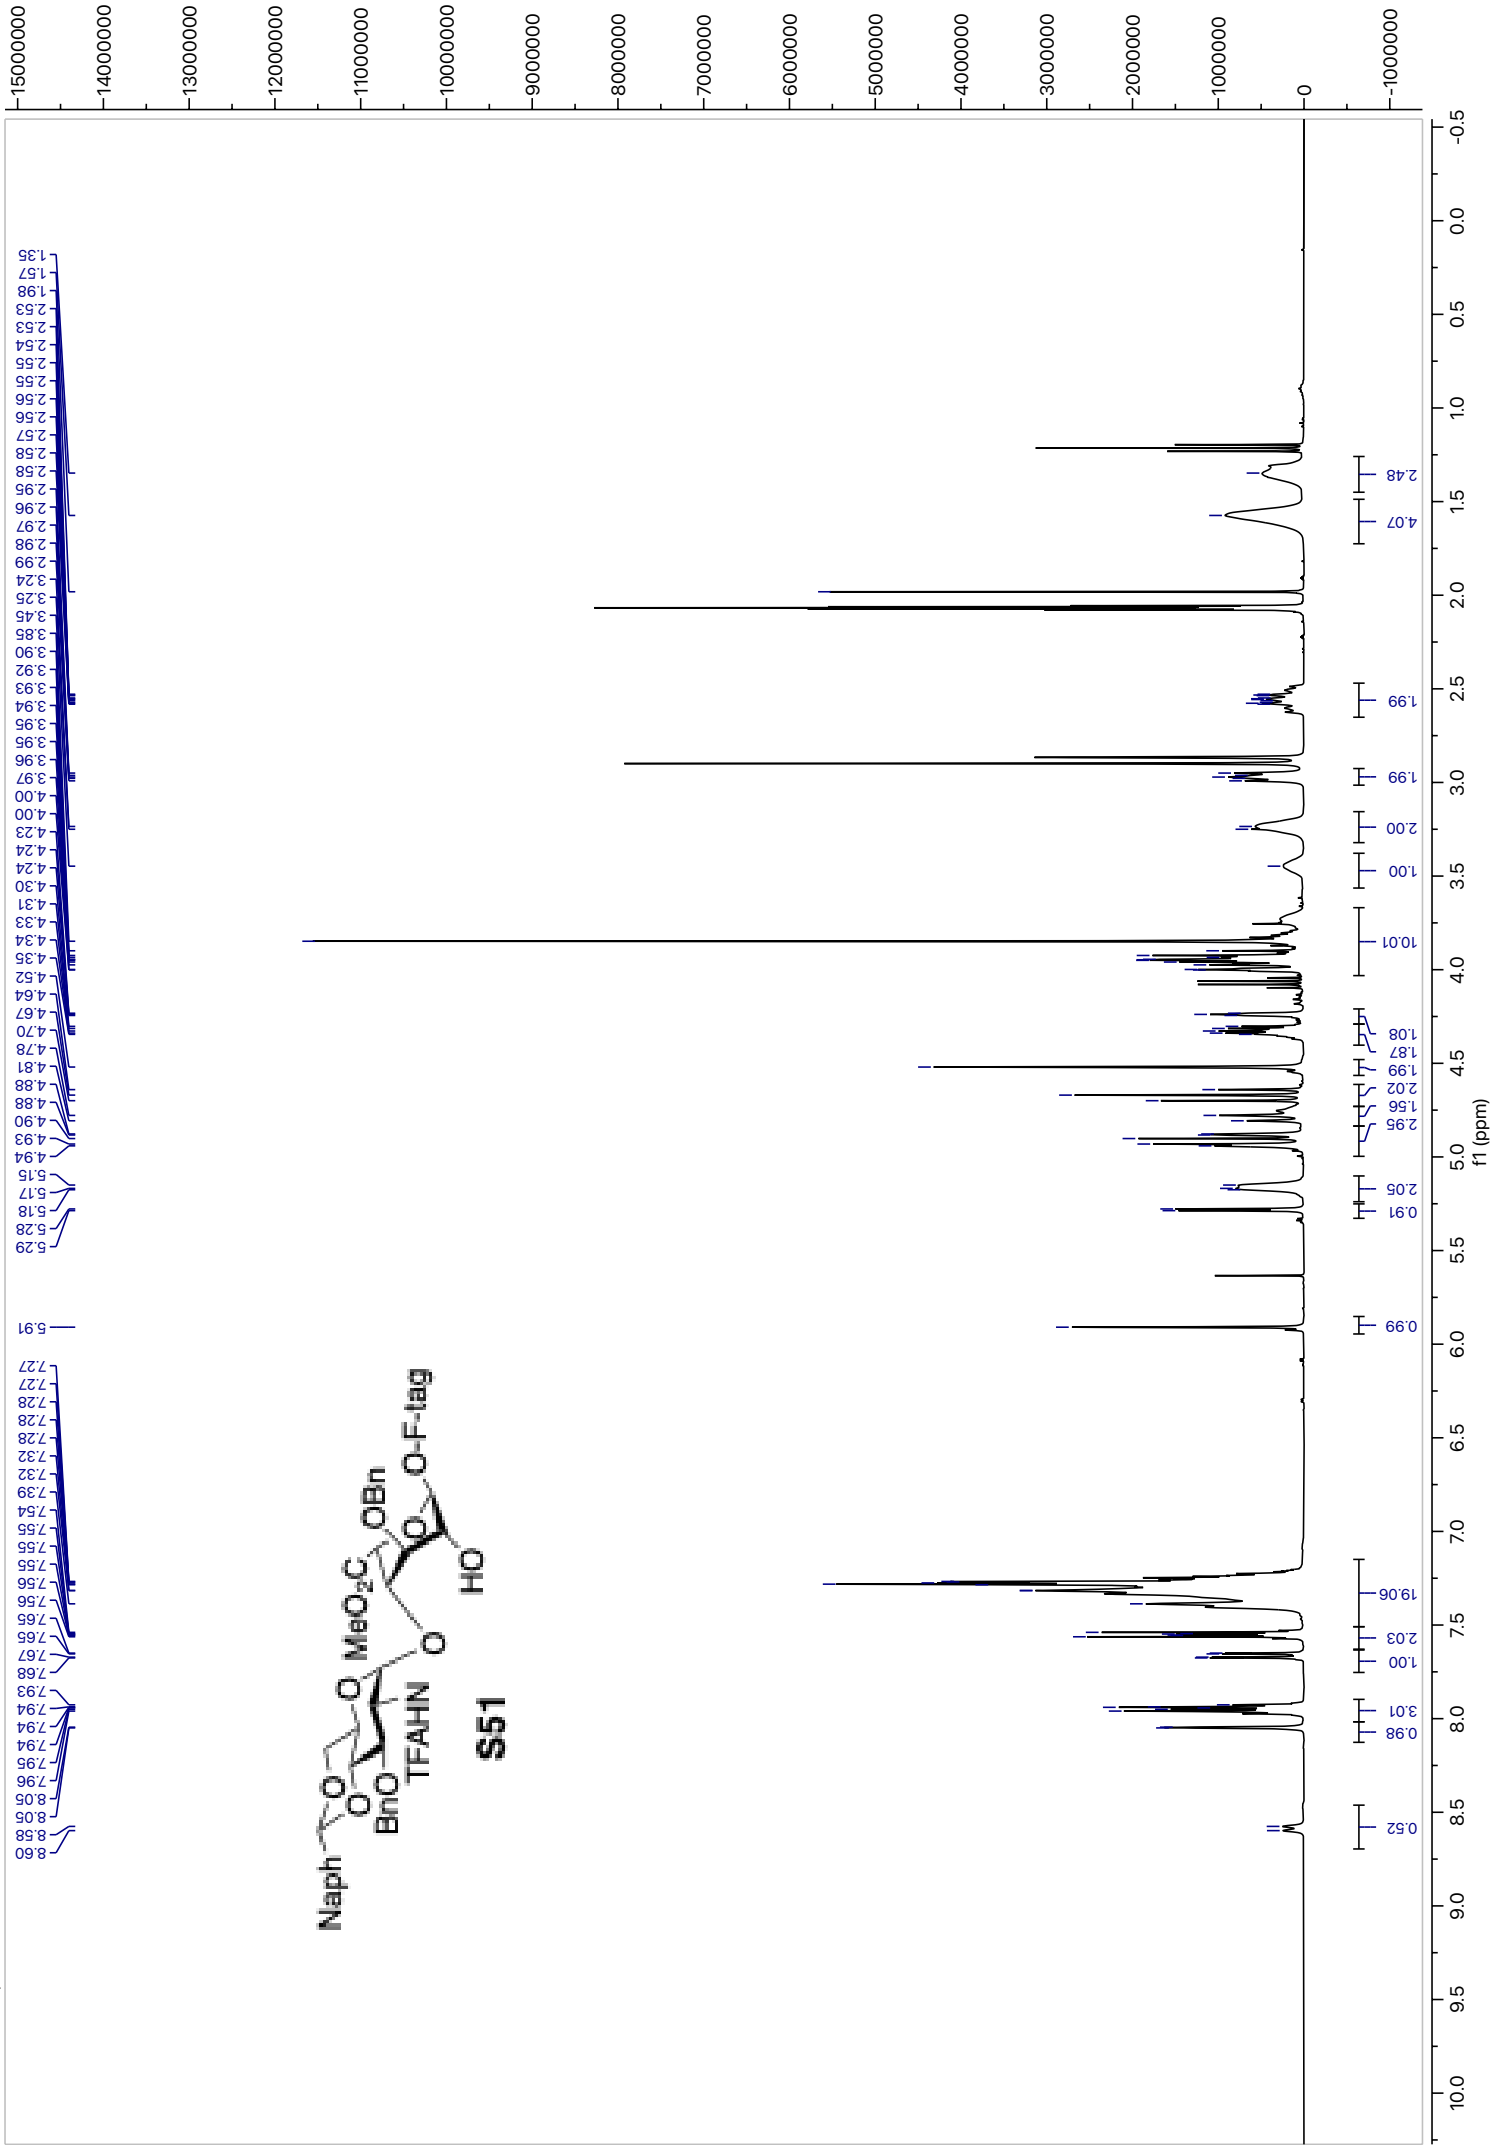

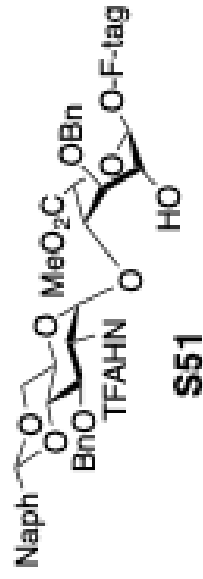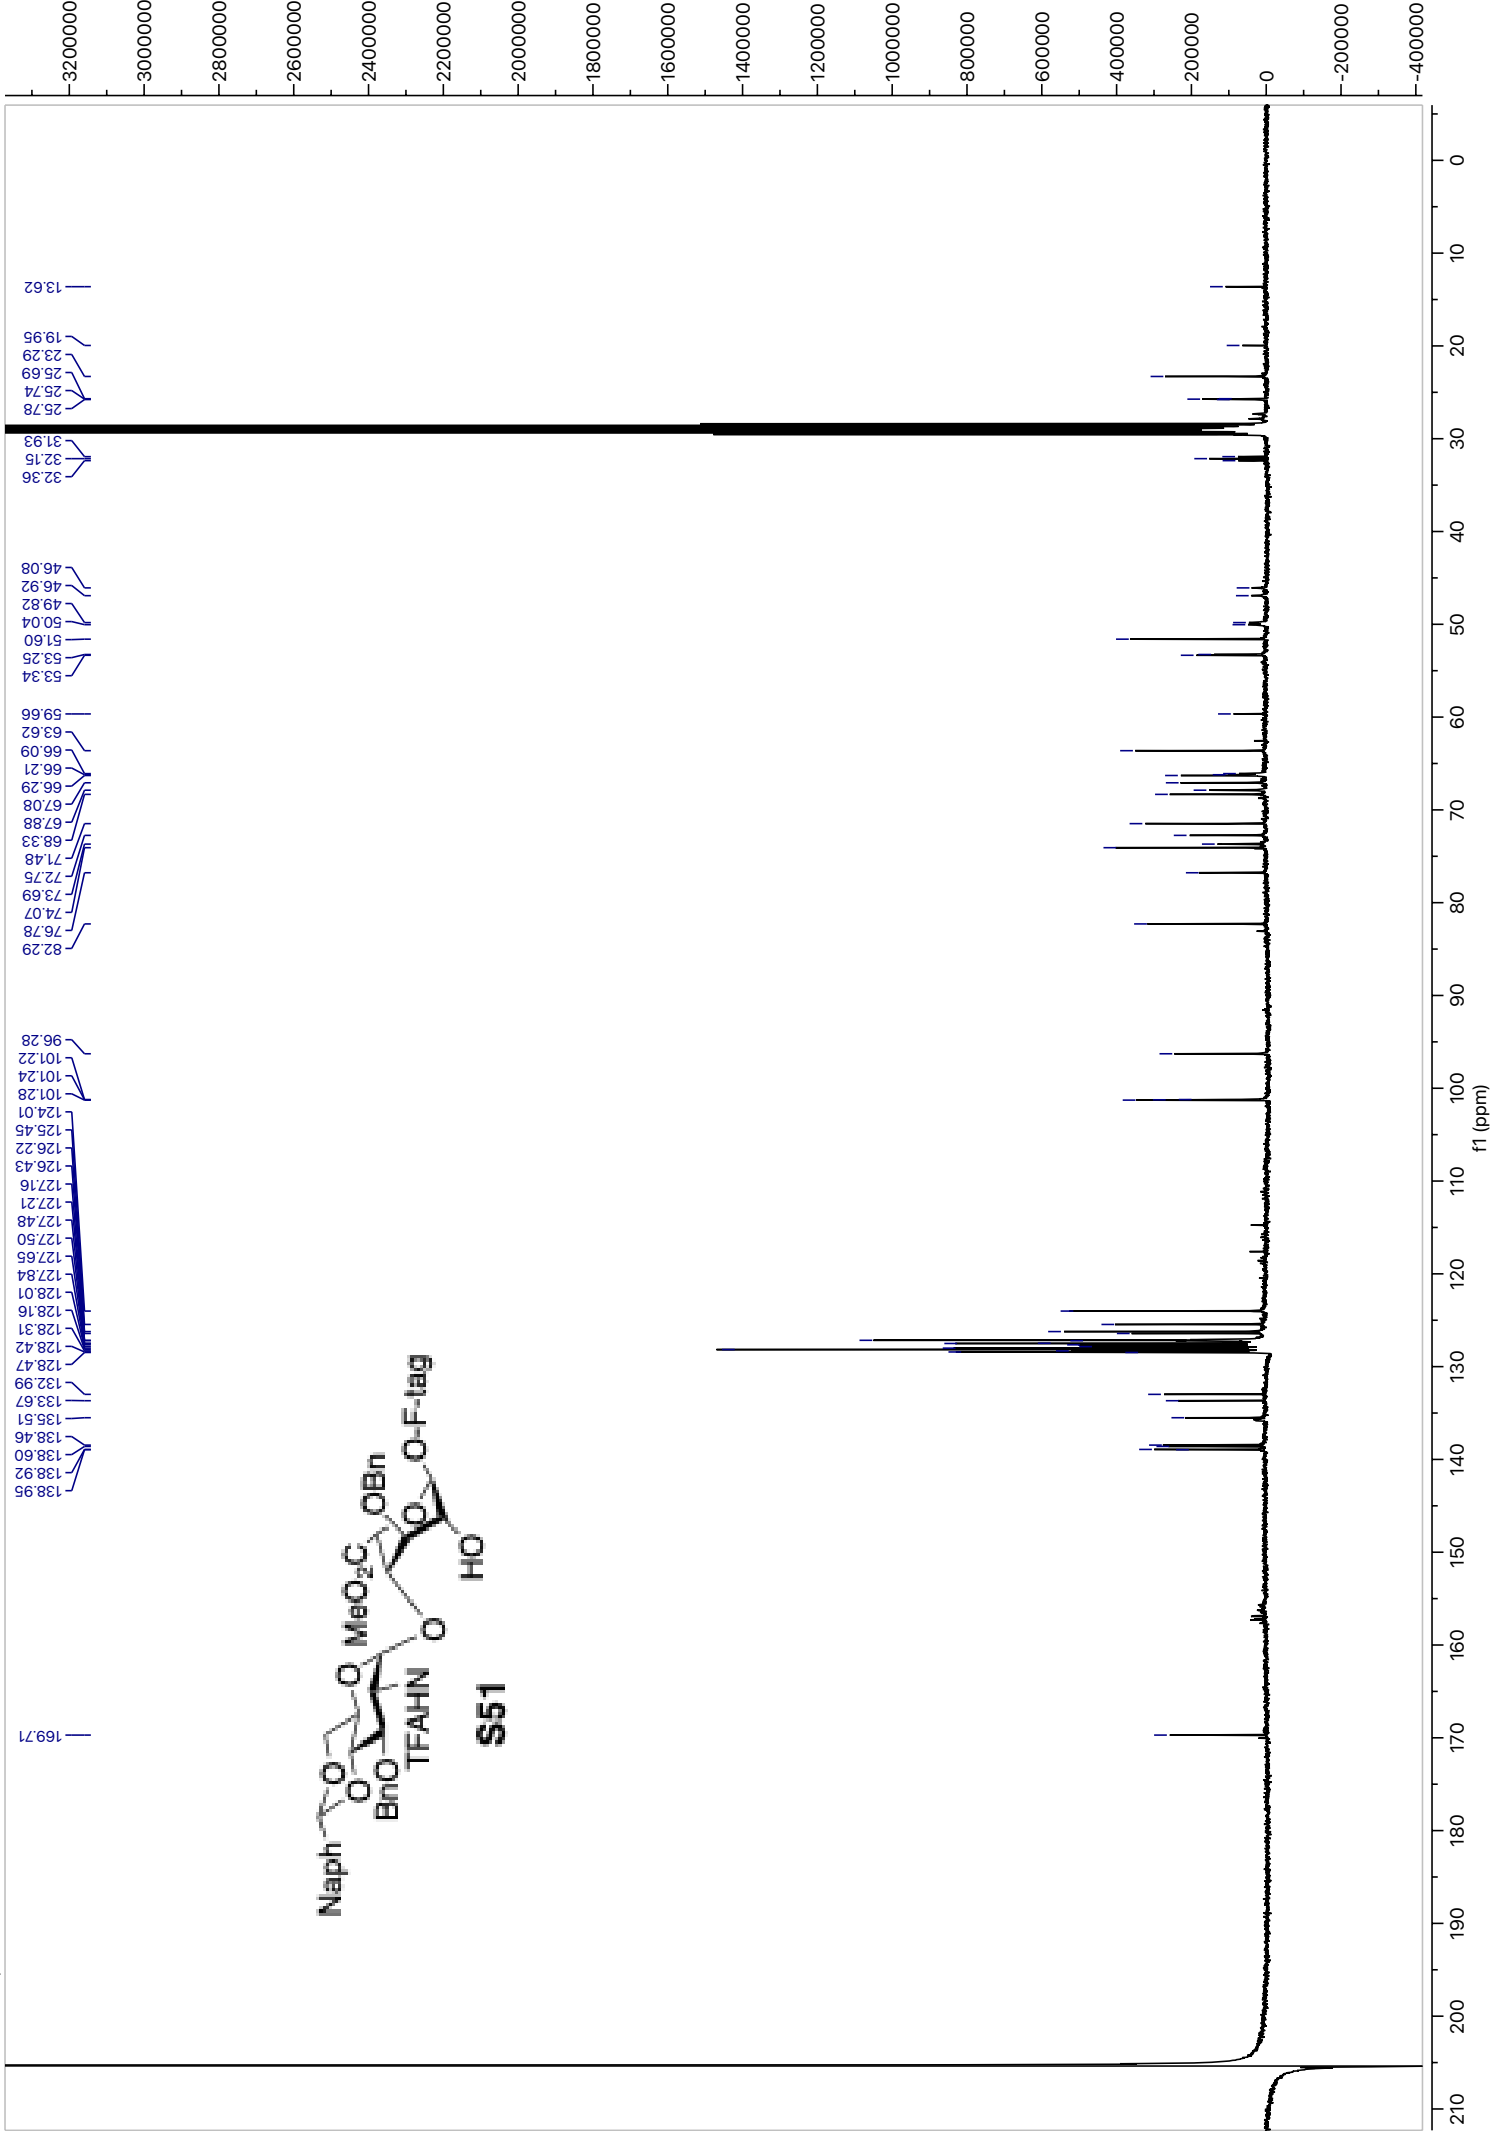

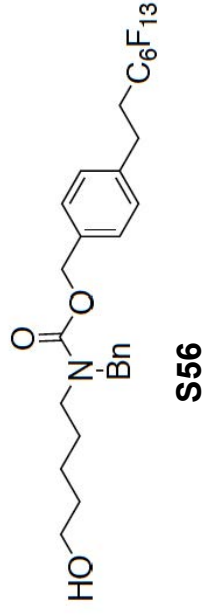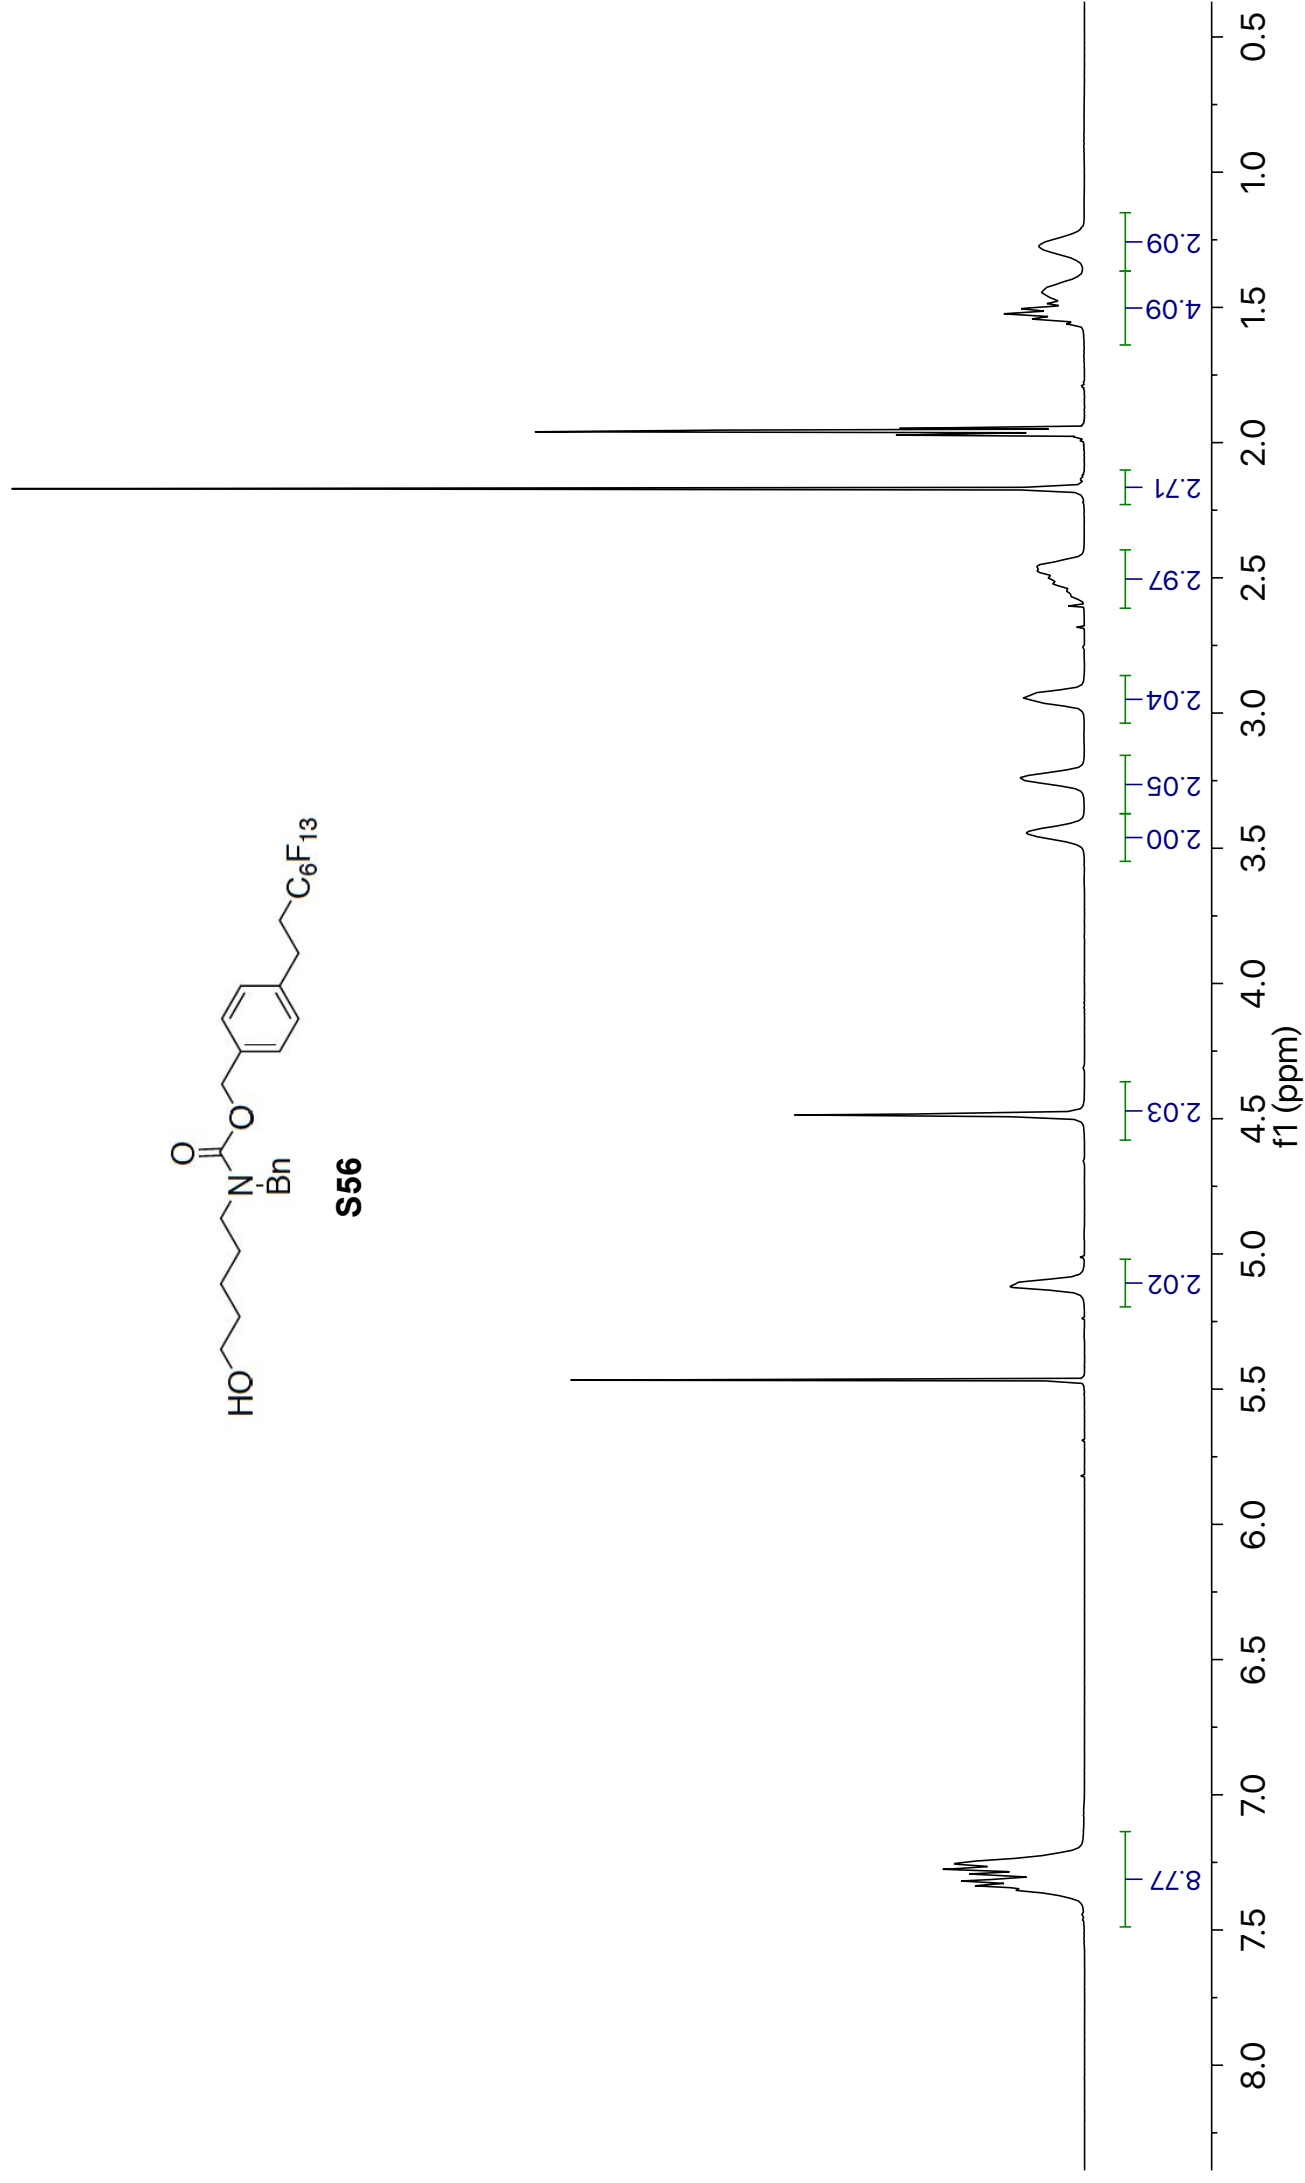

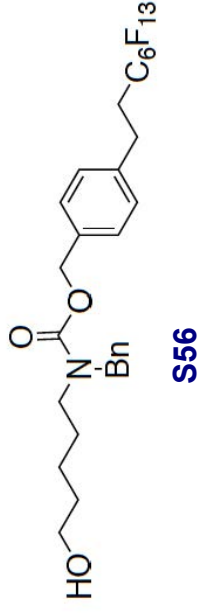

66.02  
61.05  
54.01  
49.82  
49.50  
46.78  
46.13  
31.89  
31.68  
31.47  
27.53  
27.01  
25.33  
25.29  
25.29  
25.24  
22.47

138.78  
138.31  
135.40  
128.18  
128.13  
127.72  
126.77

180 170 160 150 140 130 120 110 100 90 80 70 60 50 40 30 20 10 0 -10

f1 (ppm)

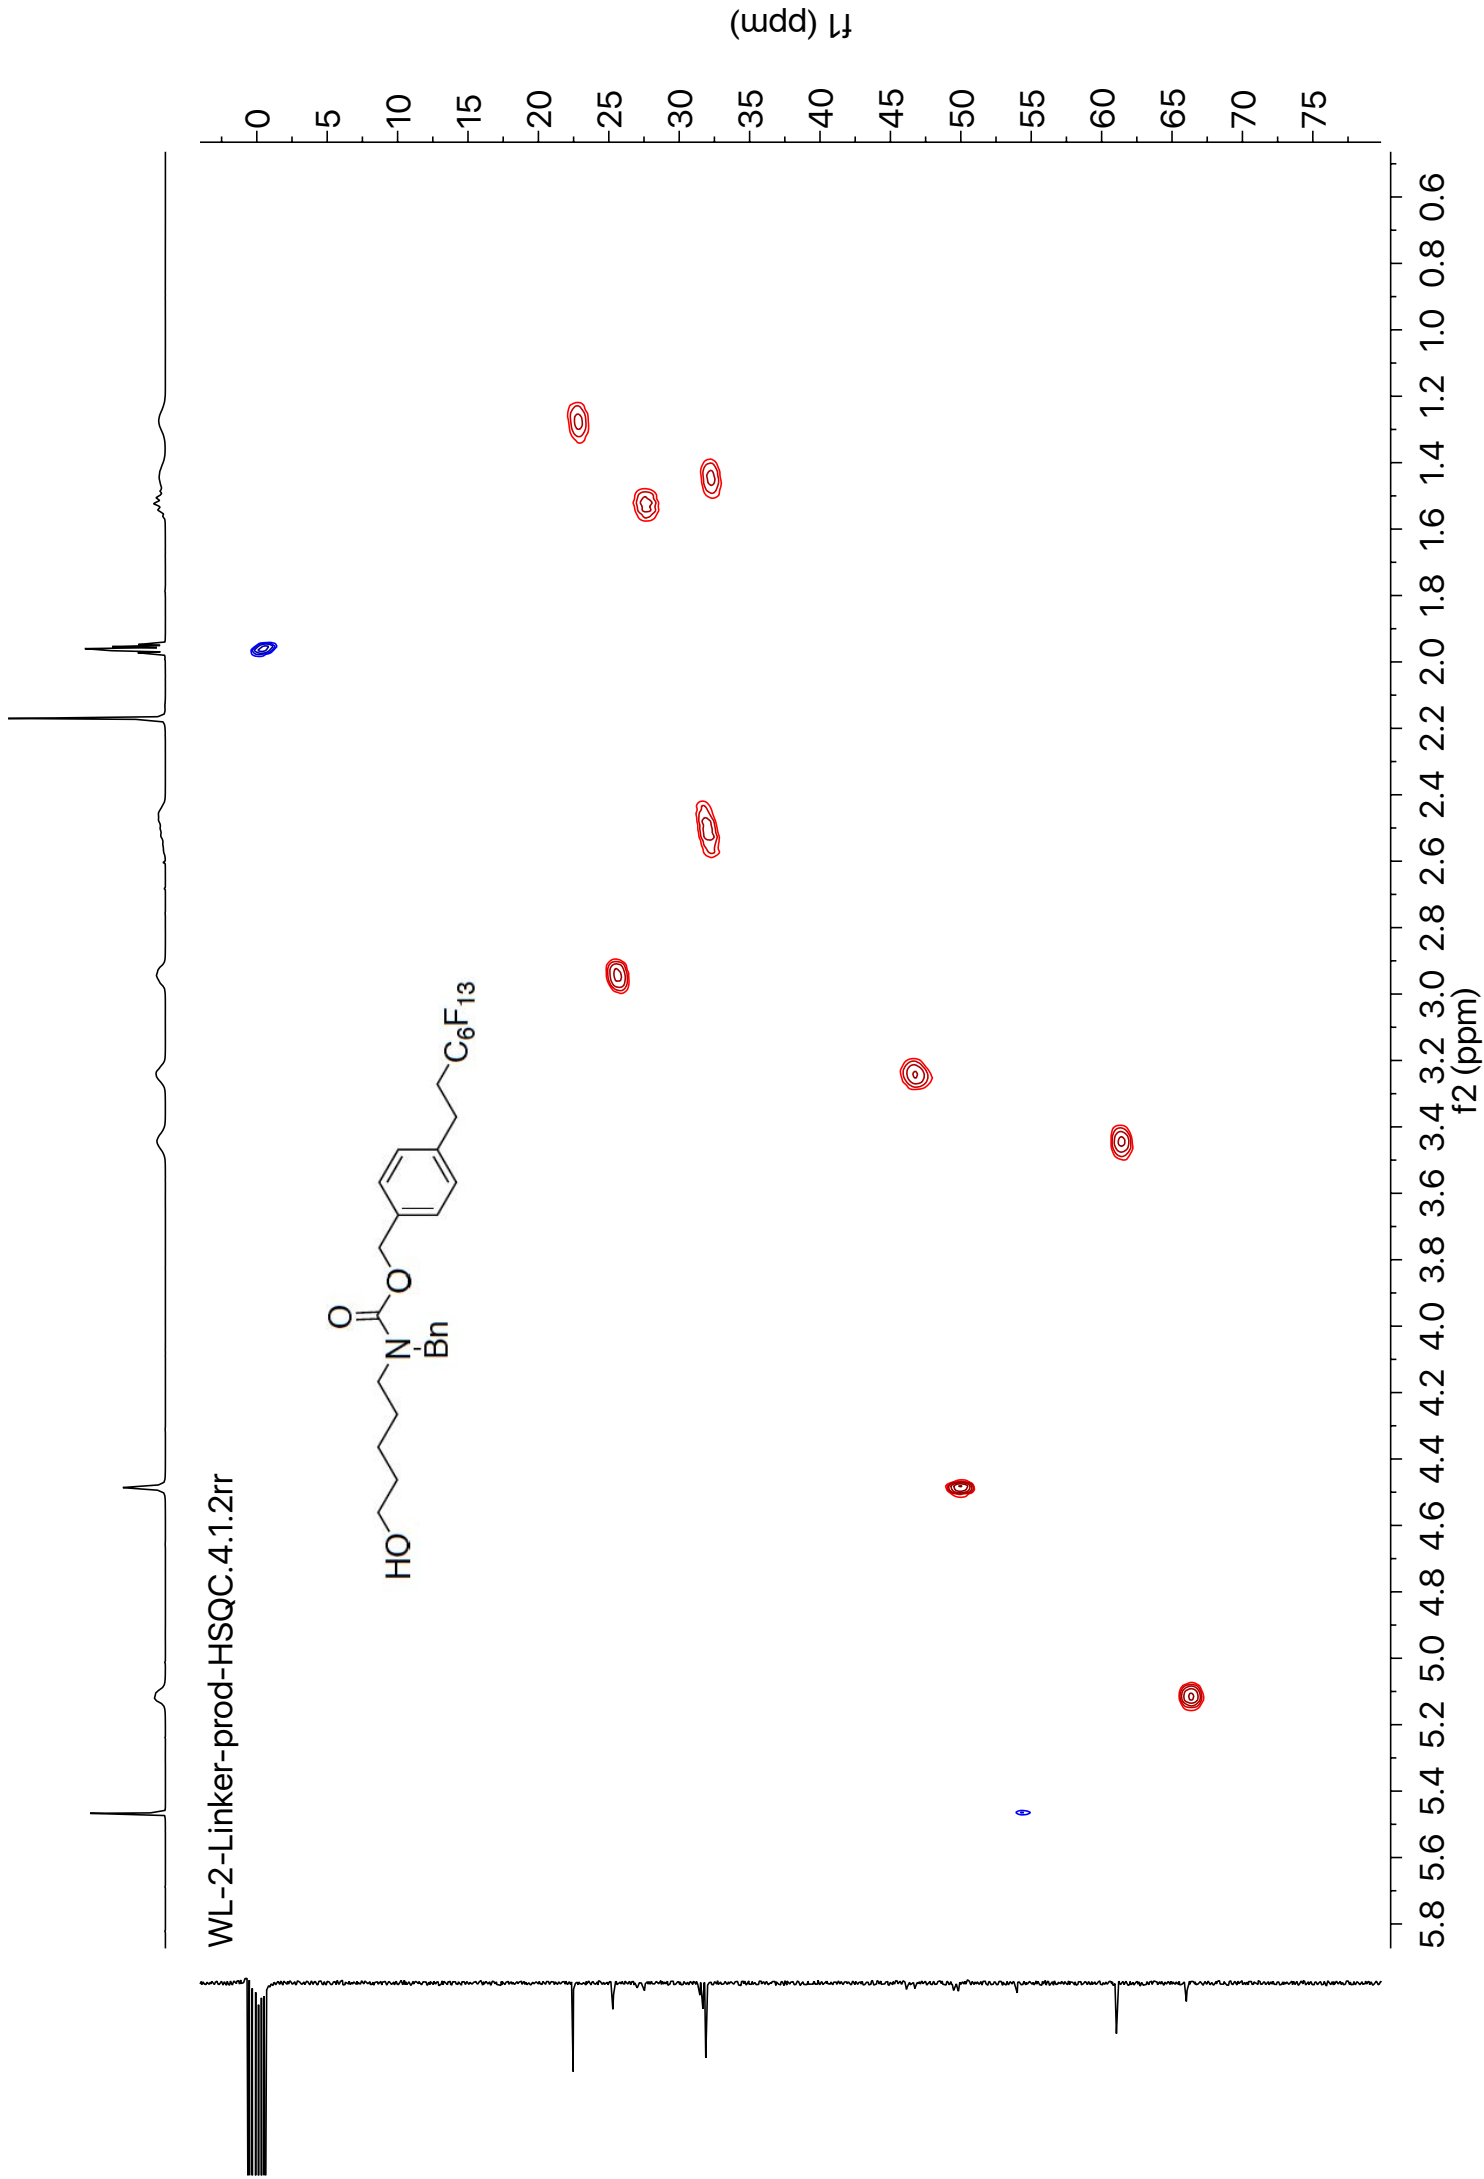

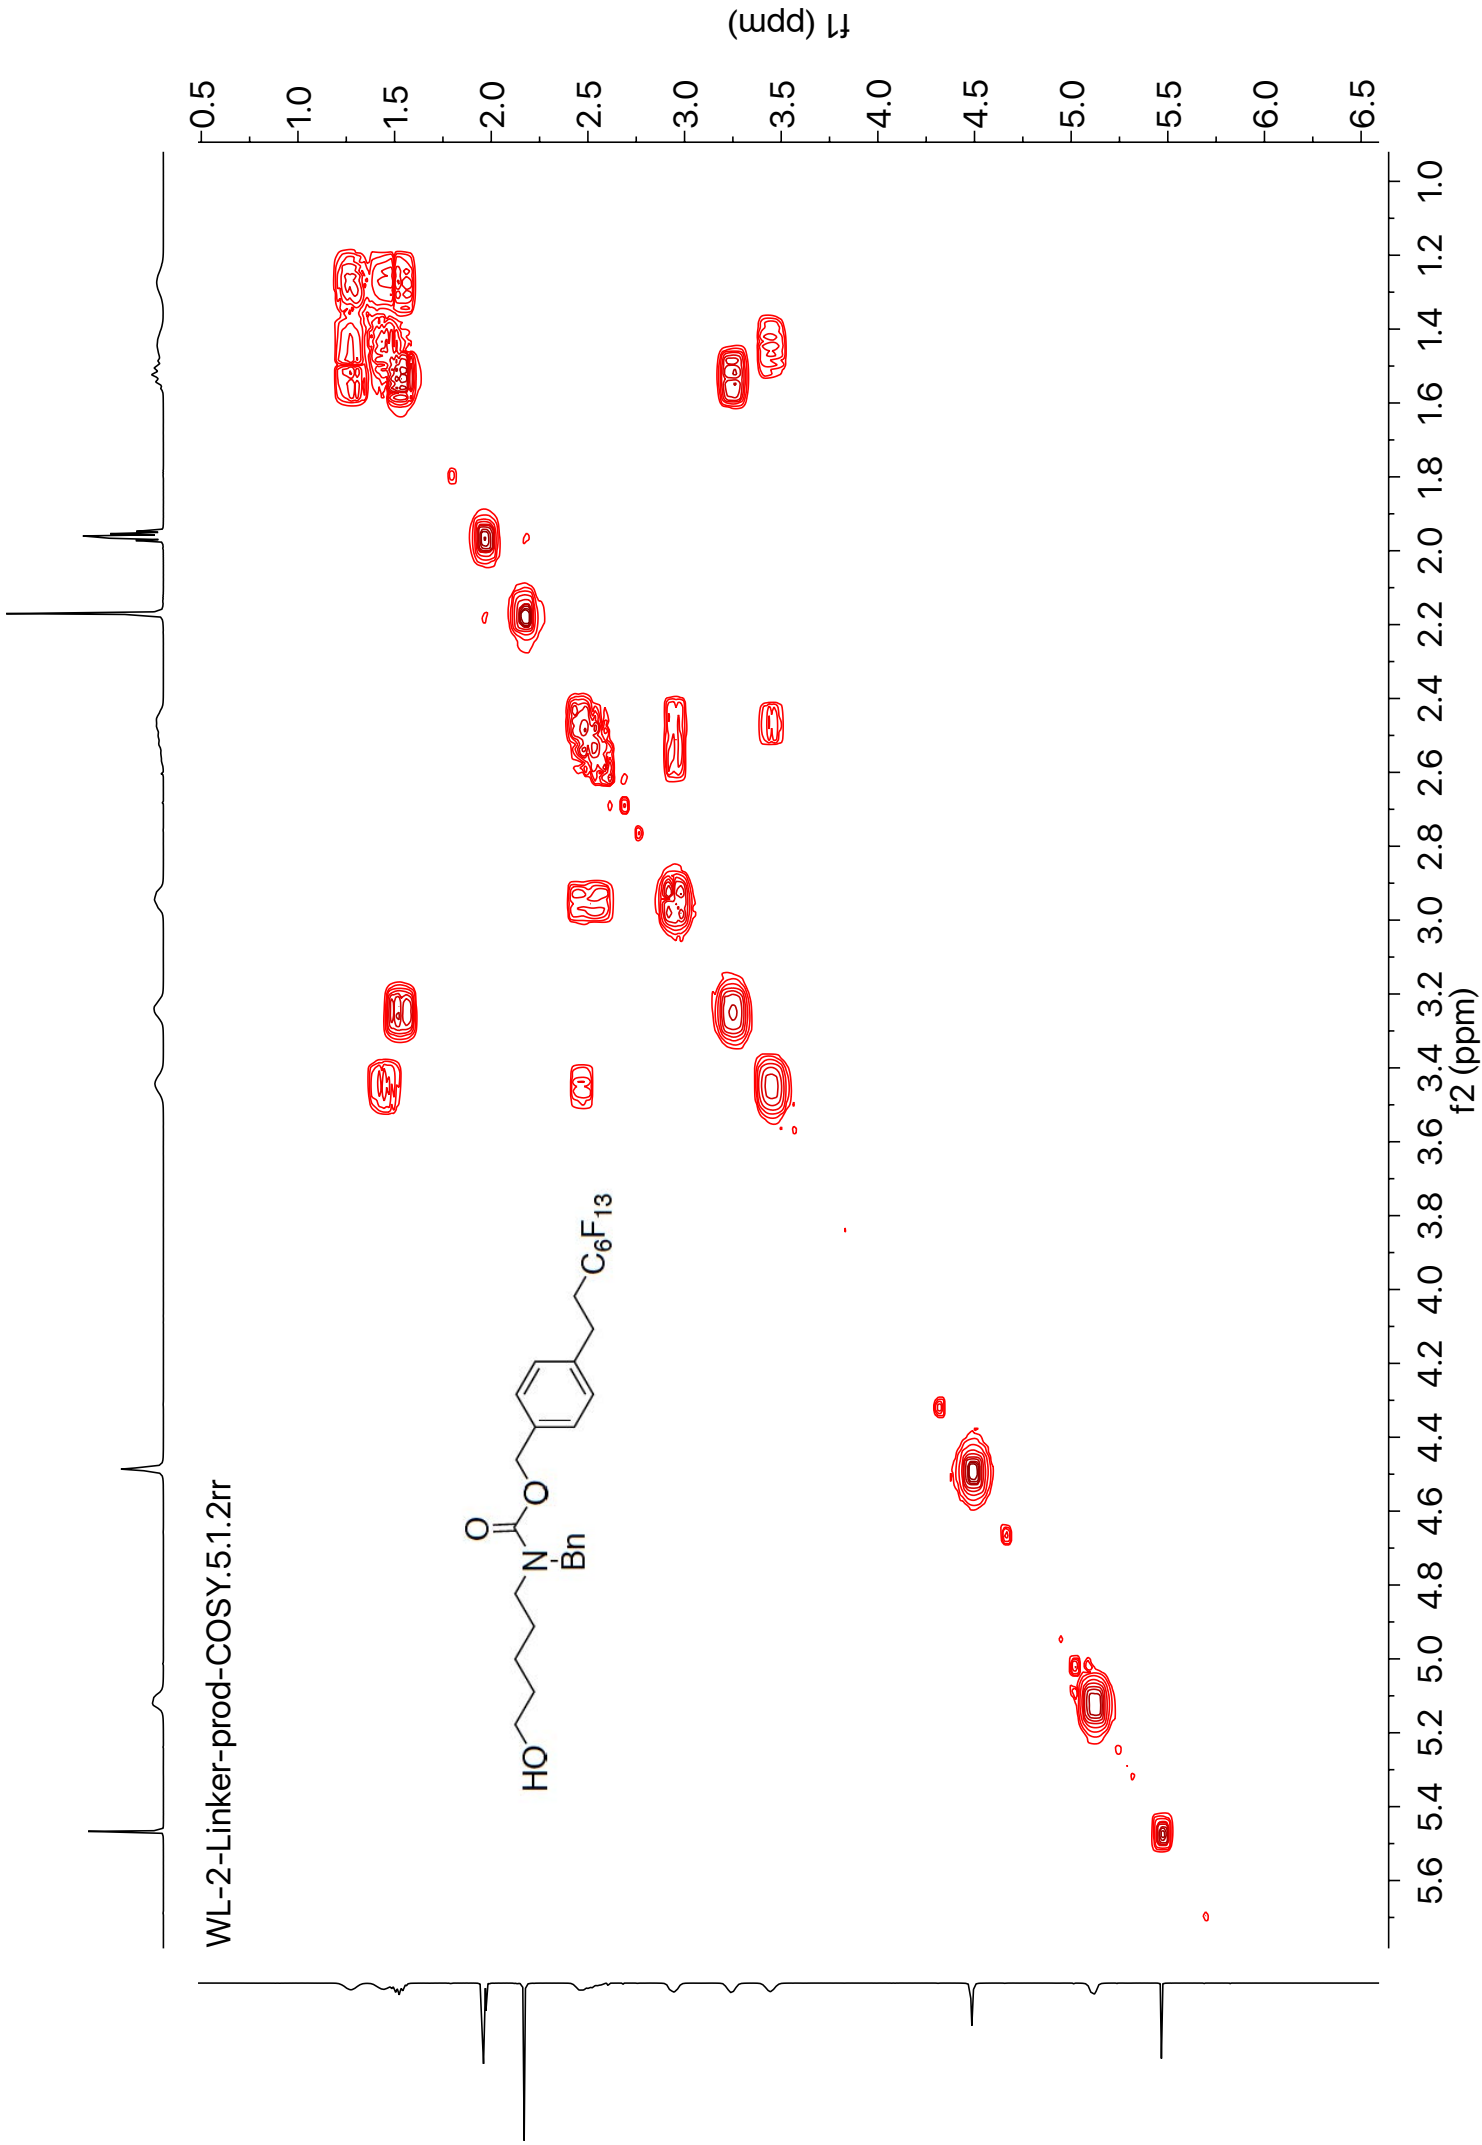

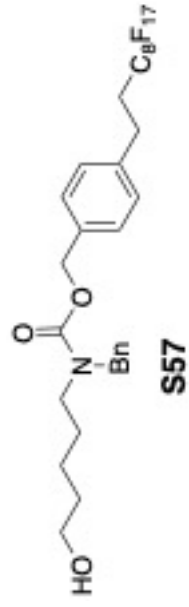

7.34  
7.32  
7.29  
7.29  
7.28  
7.28  
7.27  
7.26  
7.25  
5.47  
5.12  
5.10  
4.49  
3.44  
3.25  
3.23  
2.94  
2.47  
2.17  
1.97  
1.96  
1.95  
1.54  
1.52  
1.51  
1.49  
1.44  
1.29  
1.26

8.95  
2.00  
2.03  
2.04  
2.03  
3.04  
2.01  
4.14  
2.20

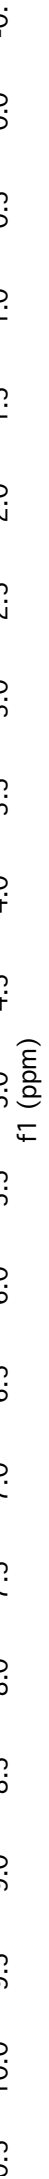

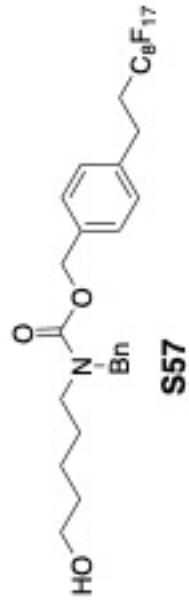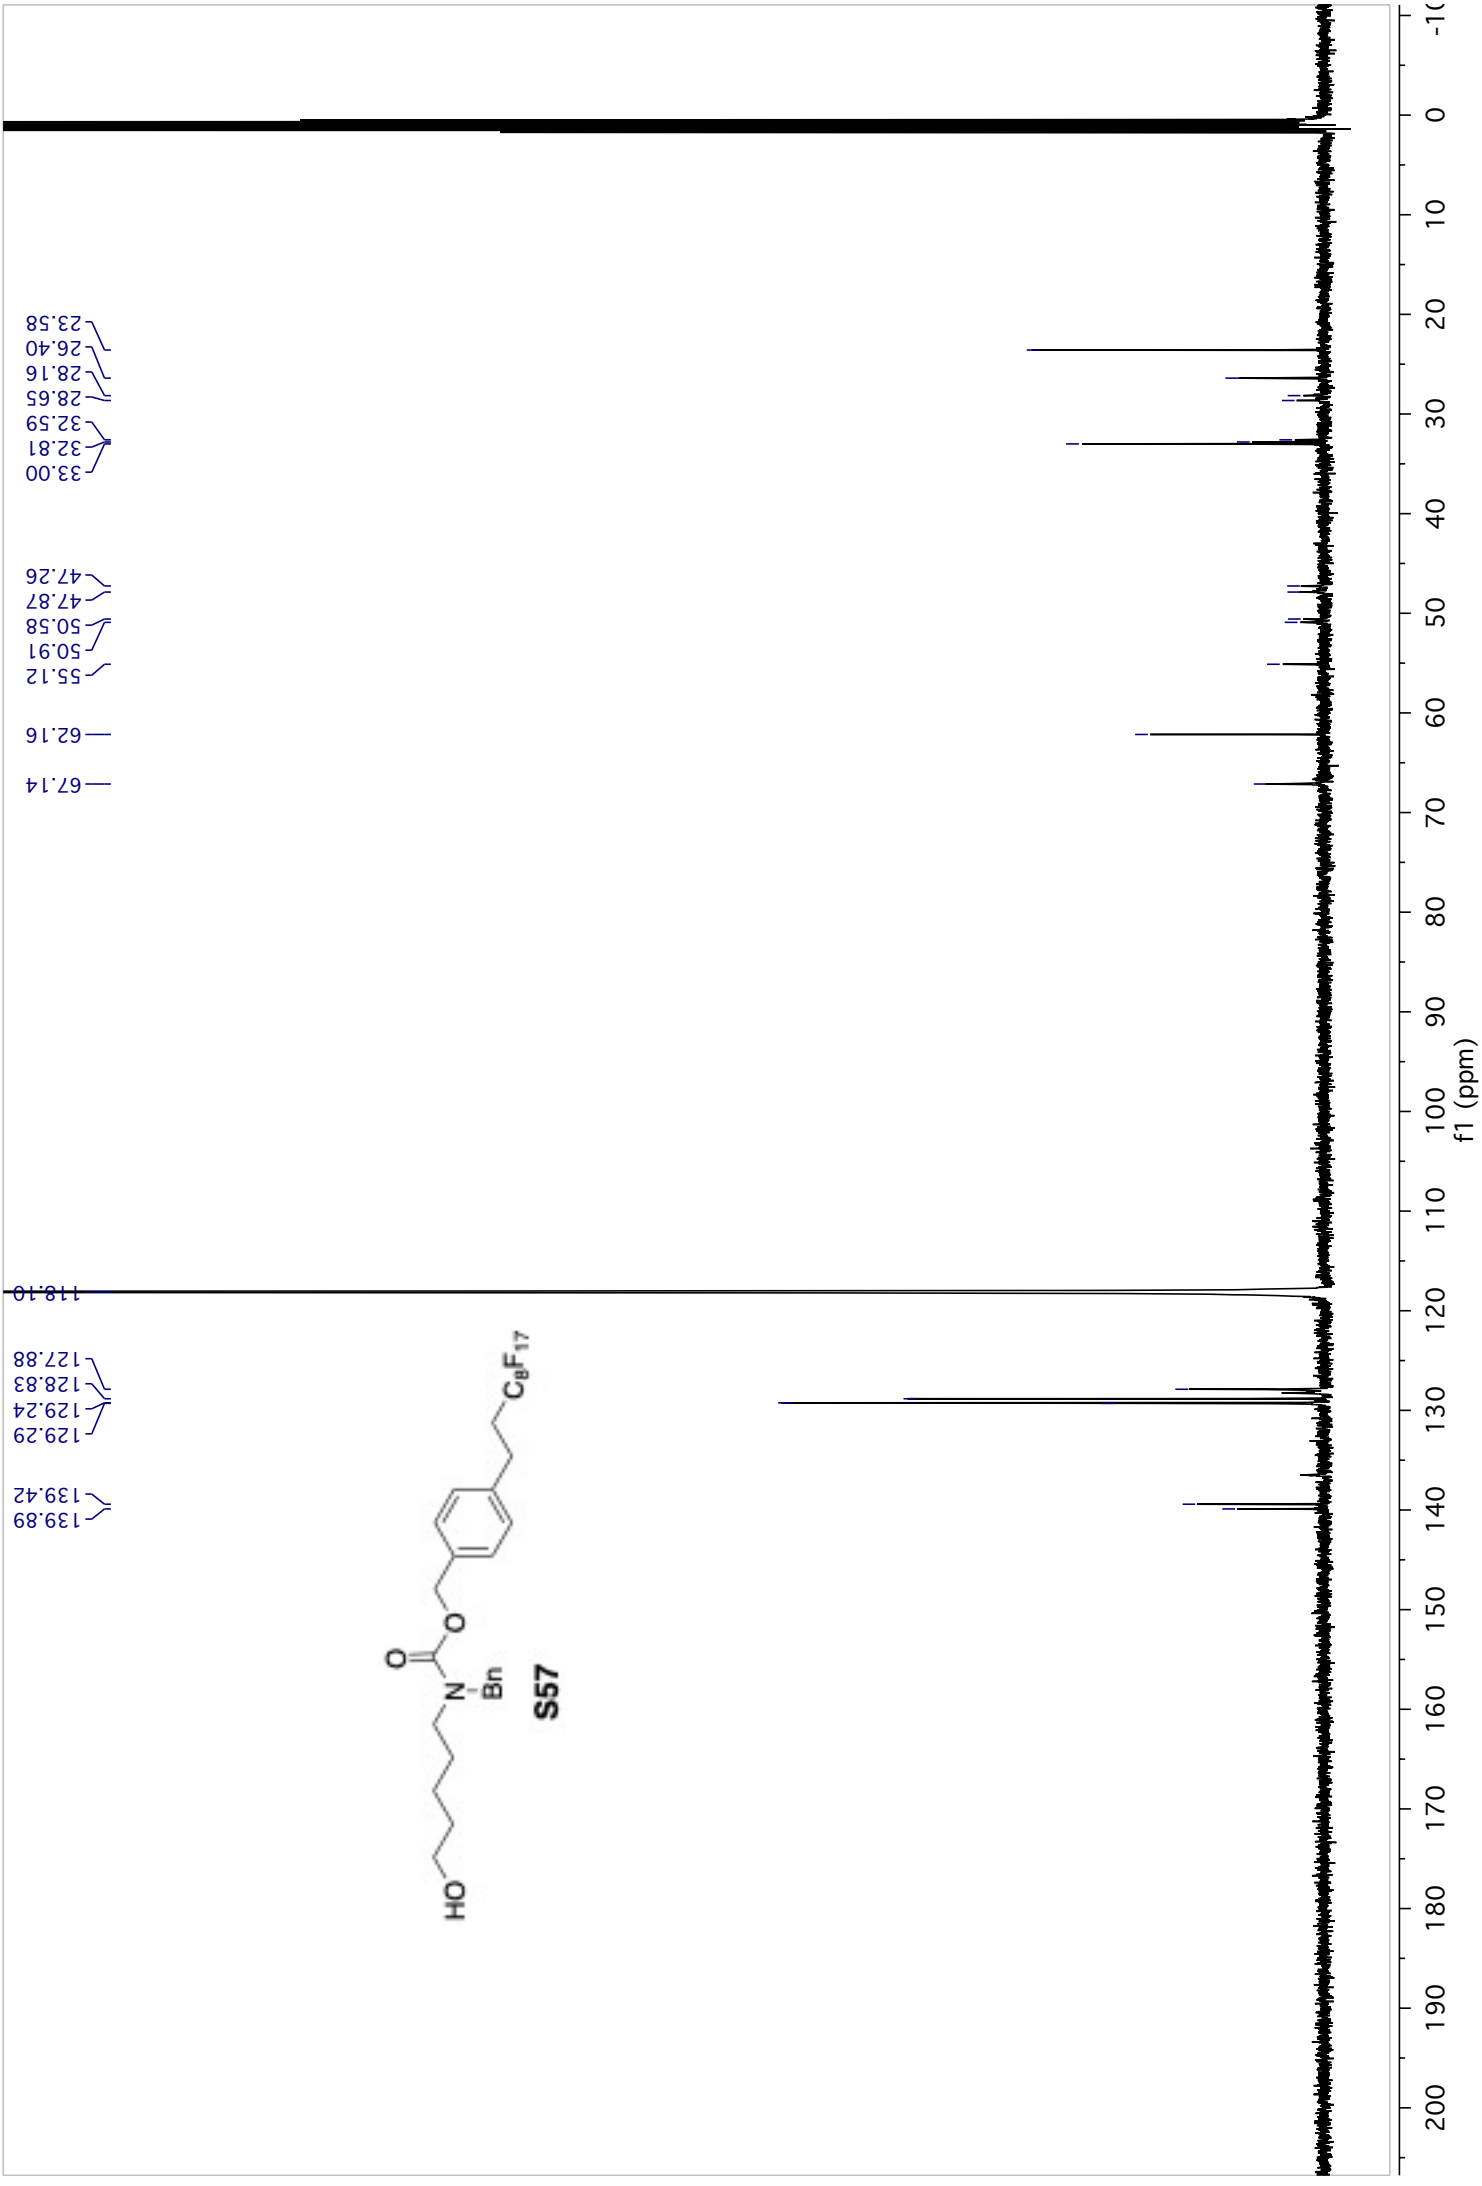





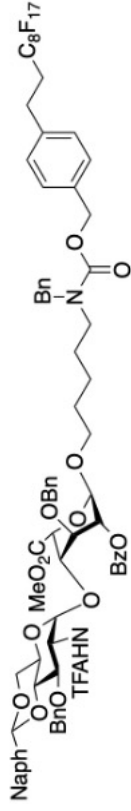

S58

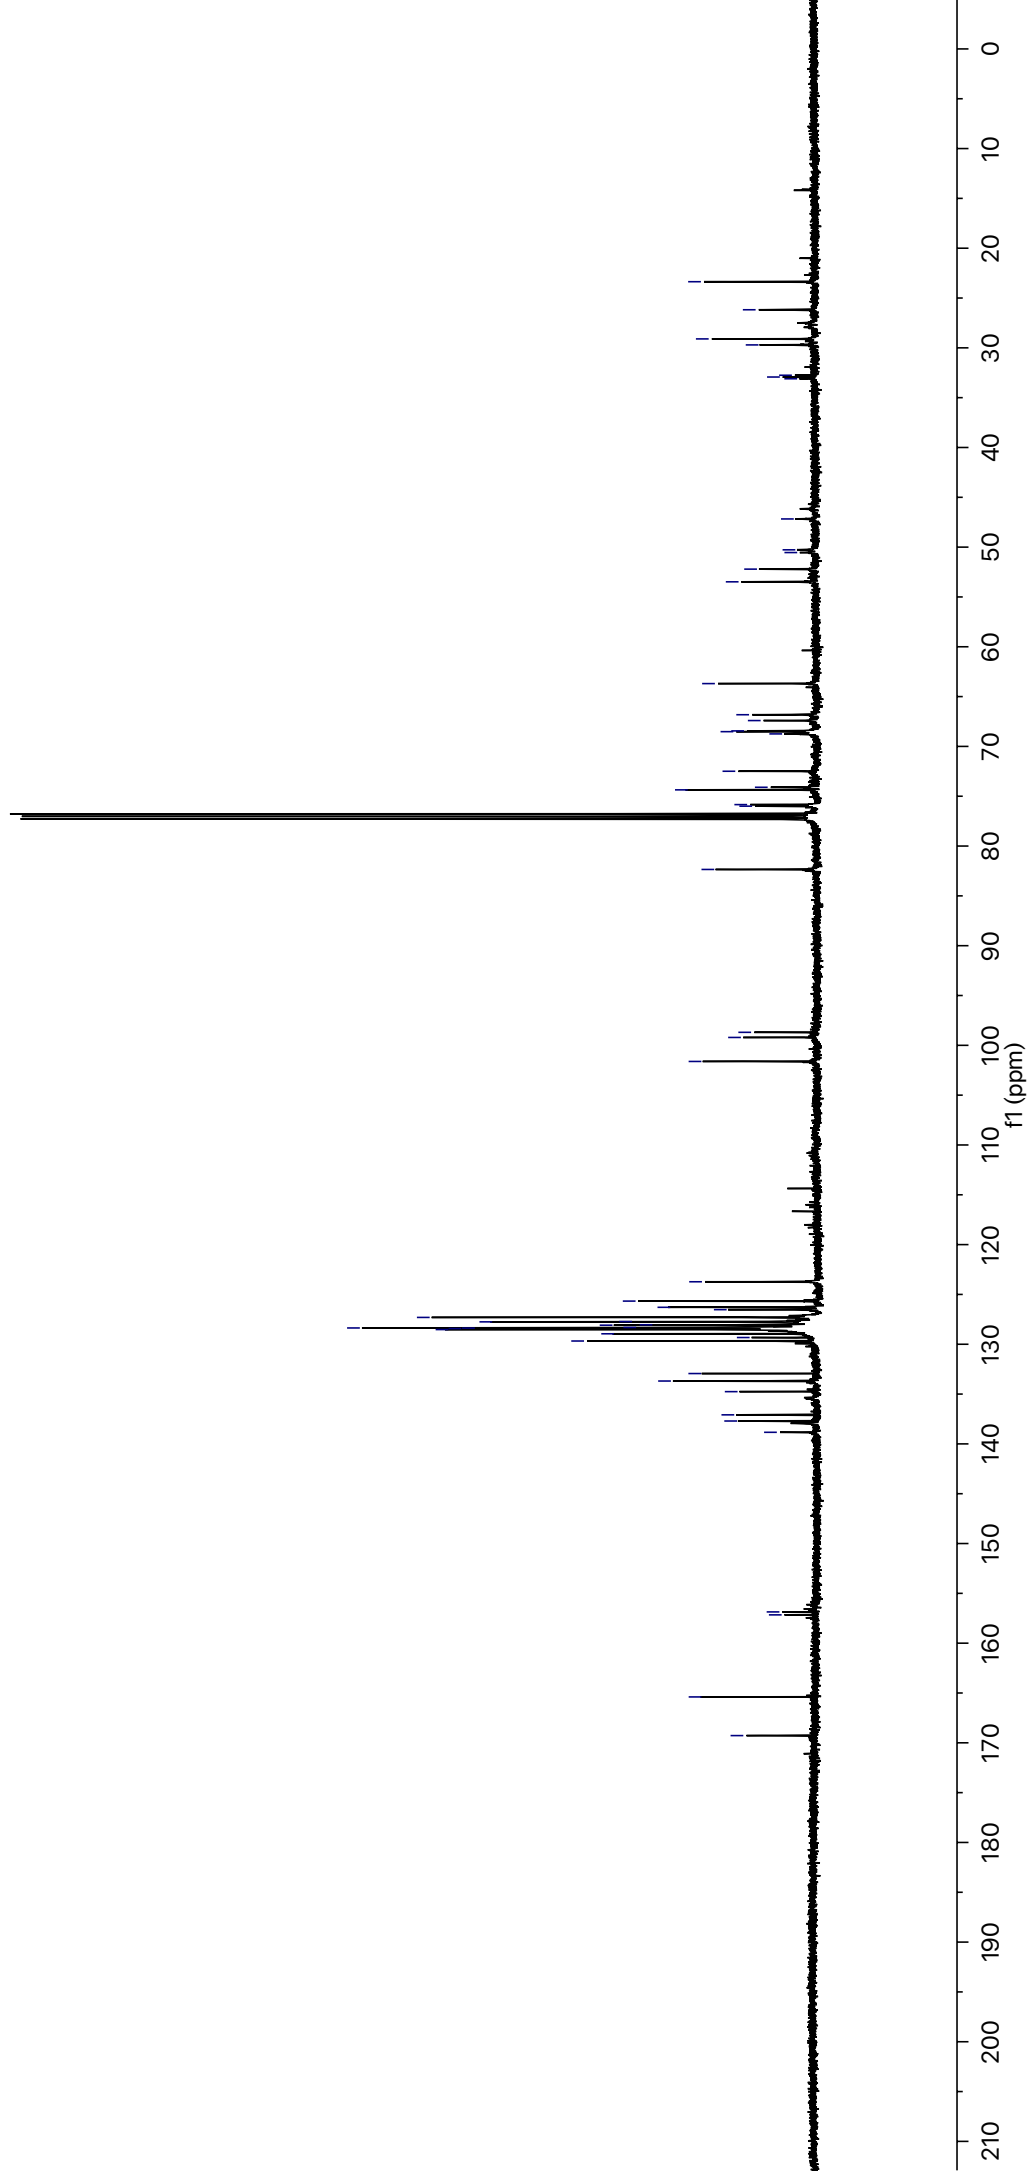

2.90  
2.92  
2.94  
3.41  
3.42  
3.44  
3.71  
3.72  
3.73  
3.74  
3.84  
3.87  
3.88  
3.89  
3.90  
3.94  
3.94  
4.13  
4.13  
4.14  
4.15  
4.22  
4.25  
4.46  
4.48  
4.52  
4.55  
4.59  
4.62  
4.76  
4.77  
4.80  
4.85  
4.85  
4.85  
5.09  
5.09  
5.10  
5.14  
5.17  
5.19  
5.19  
5.32  
5.32  
7.09  
7.09  
7.11  
7.11  
7.18  
7.22  
7.23  
7.23  
7.24  
7.24  
7.26  
7.26  
7.27  
7.27  
7.28  
7.28  
7.28  
7.29  
7.29  
7.30  
7.31  
7.31  
7.32  
7.32  
7.32  
7.33  
7.42  
7.43  
7.43  
7.44  
7.45  
7.47  
7.47  
7.49  
7.49  
7.50  
7.50  
7.51  
7.51  
7.52  
7.52  
7.80  
7.80  
7.84  
7.84  
7.88  
7.88  
7.88  
7.88  
8.0  
8.0  
8.0  
8.0  
8.0

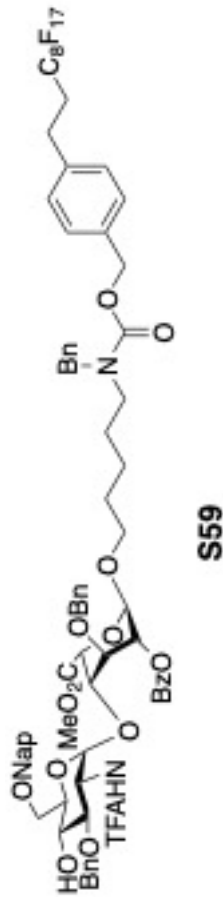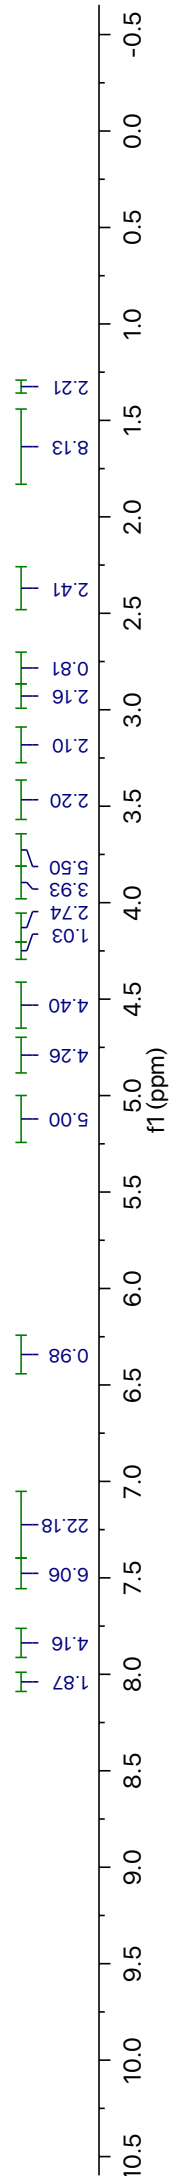

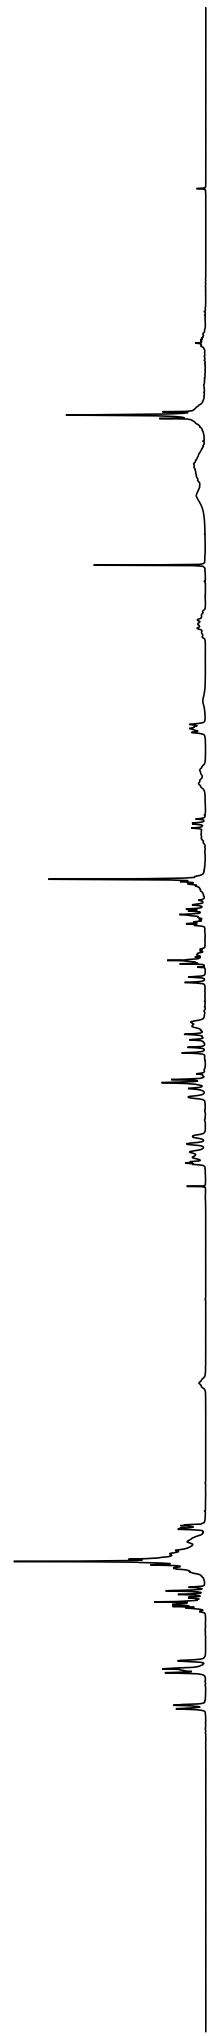

WL-2-065-F8-Open-Nap-HSQC.1.1.2rr

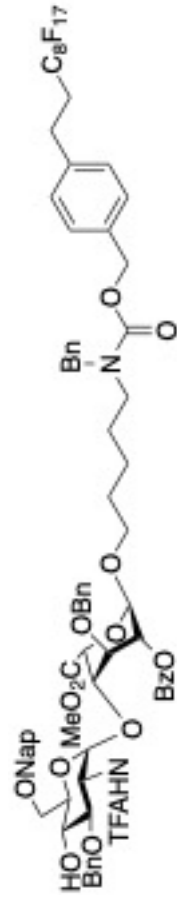

S59

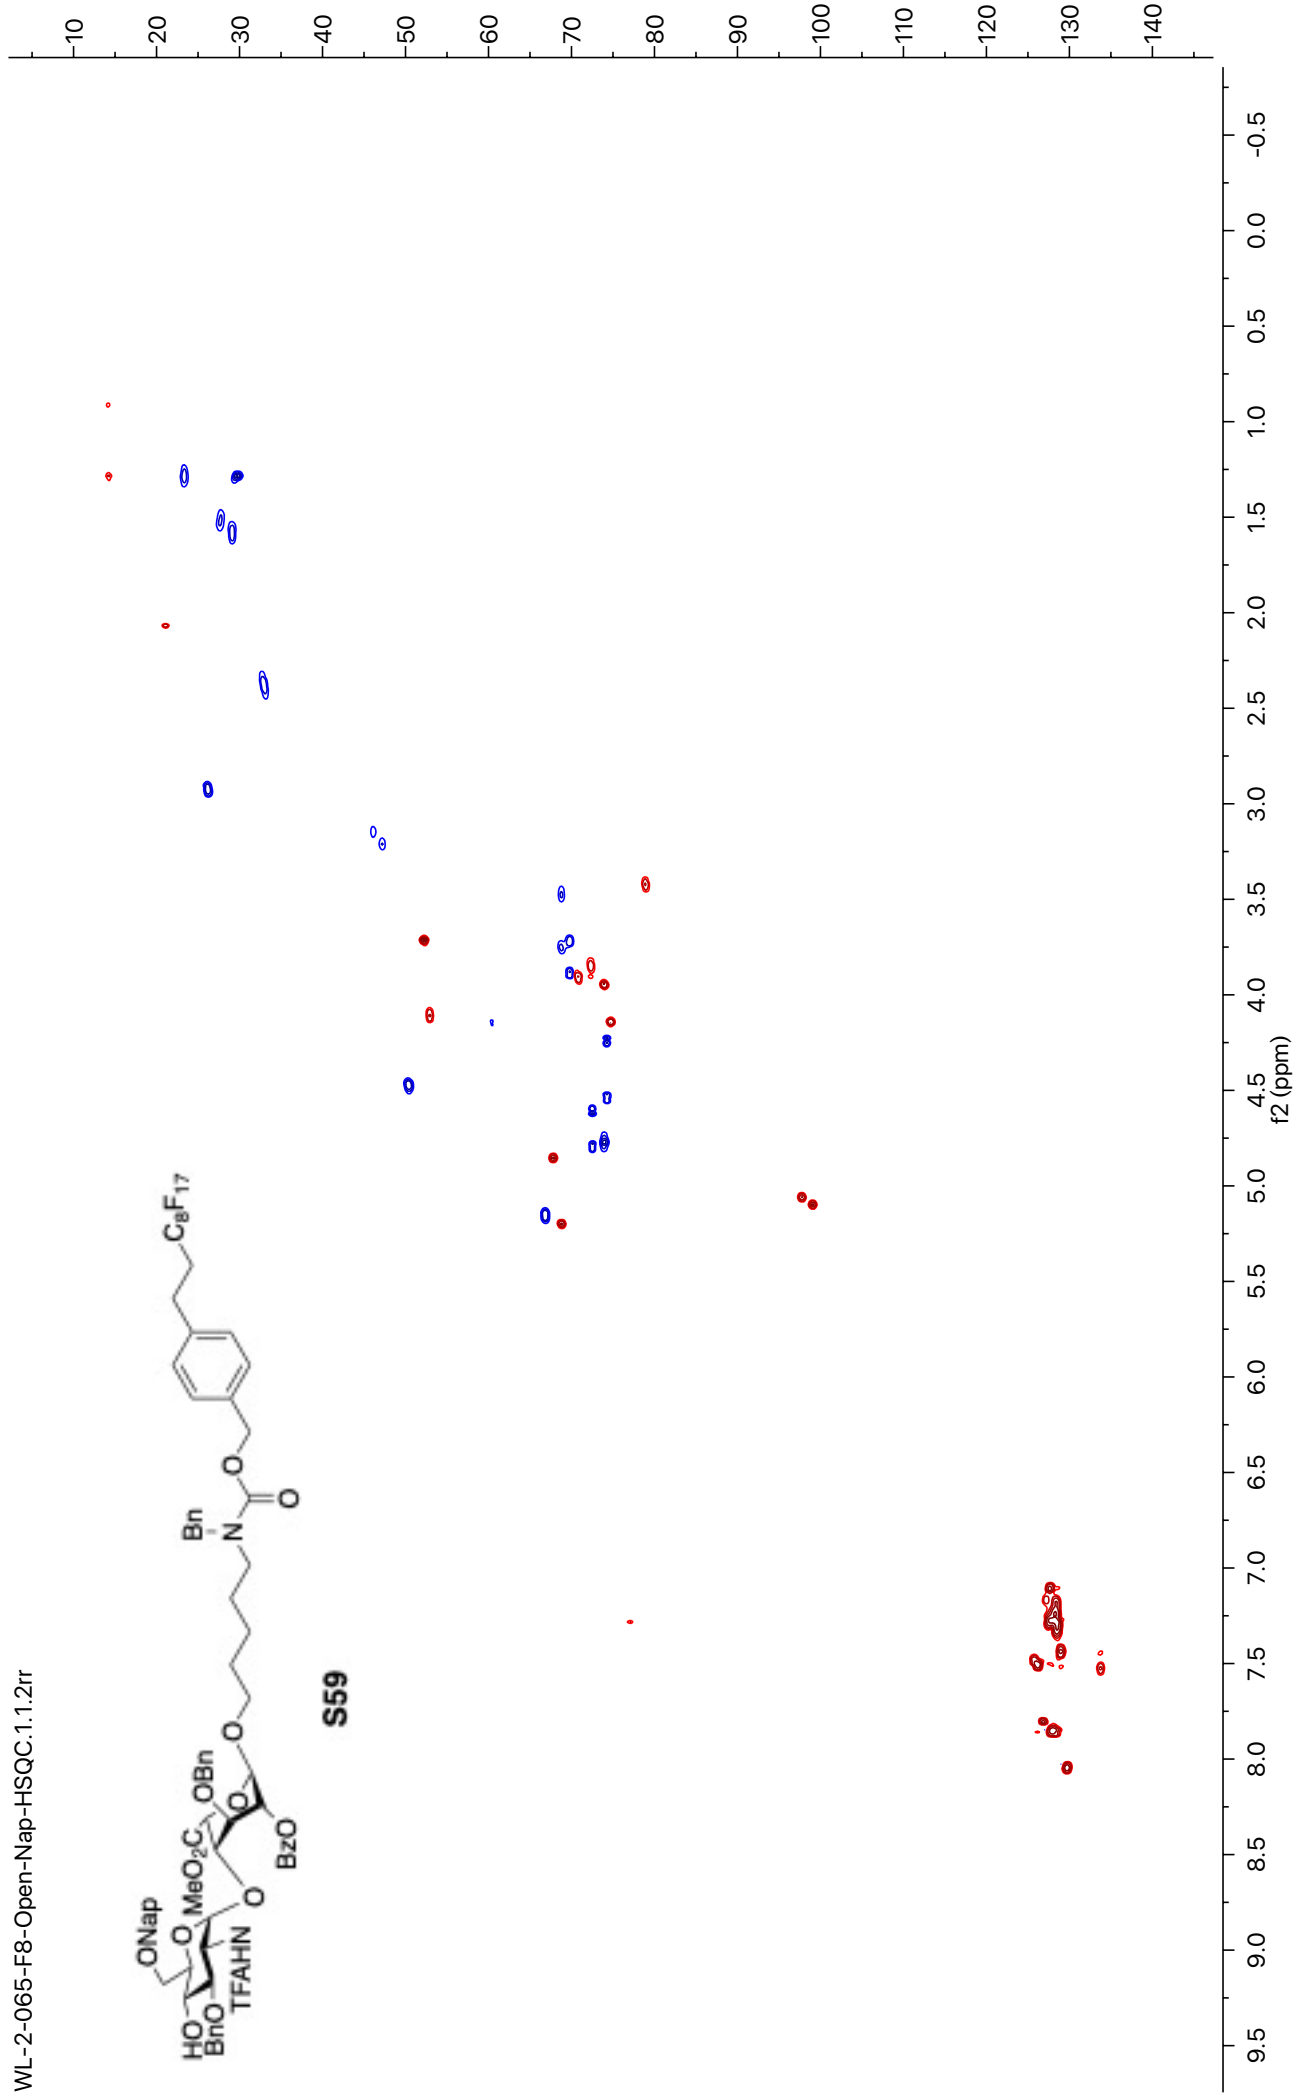



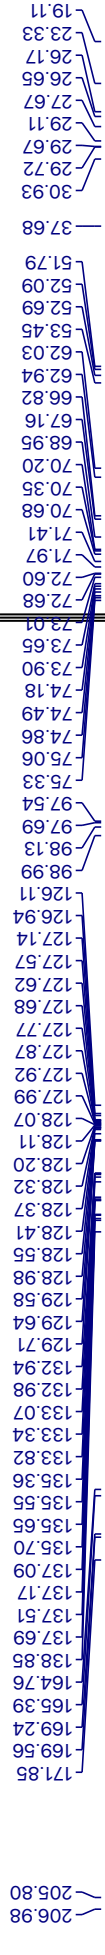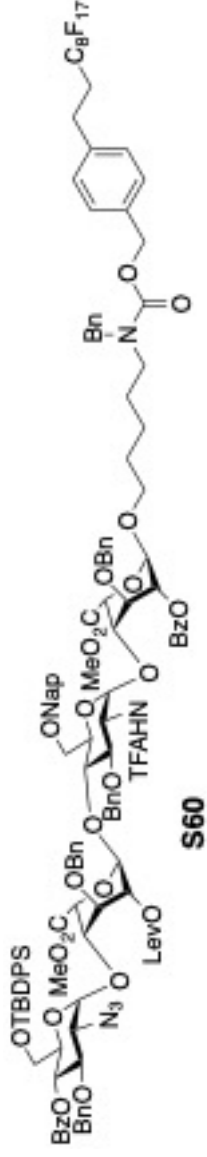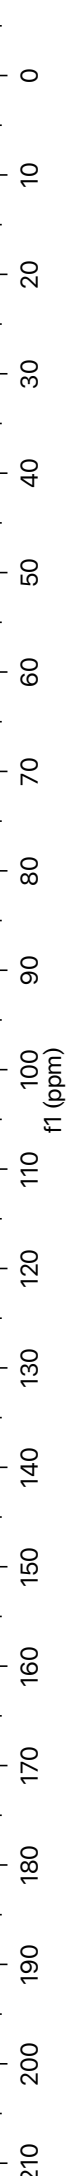

WL-2-066-F8-Tetra-HSQC-CH.1.1.2rr

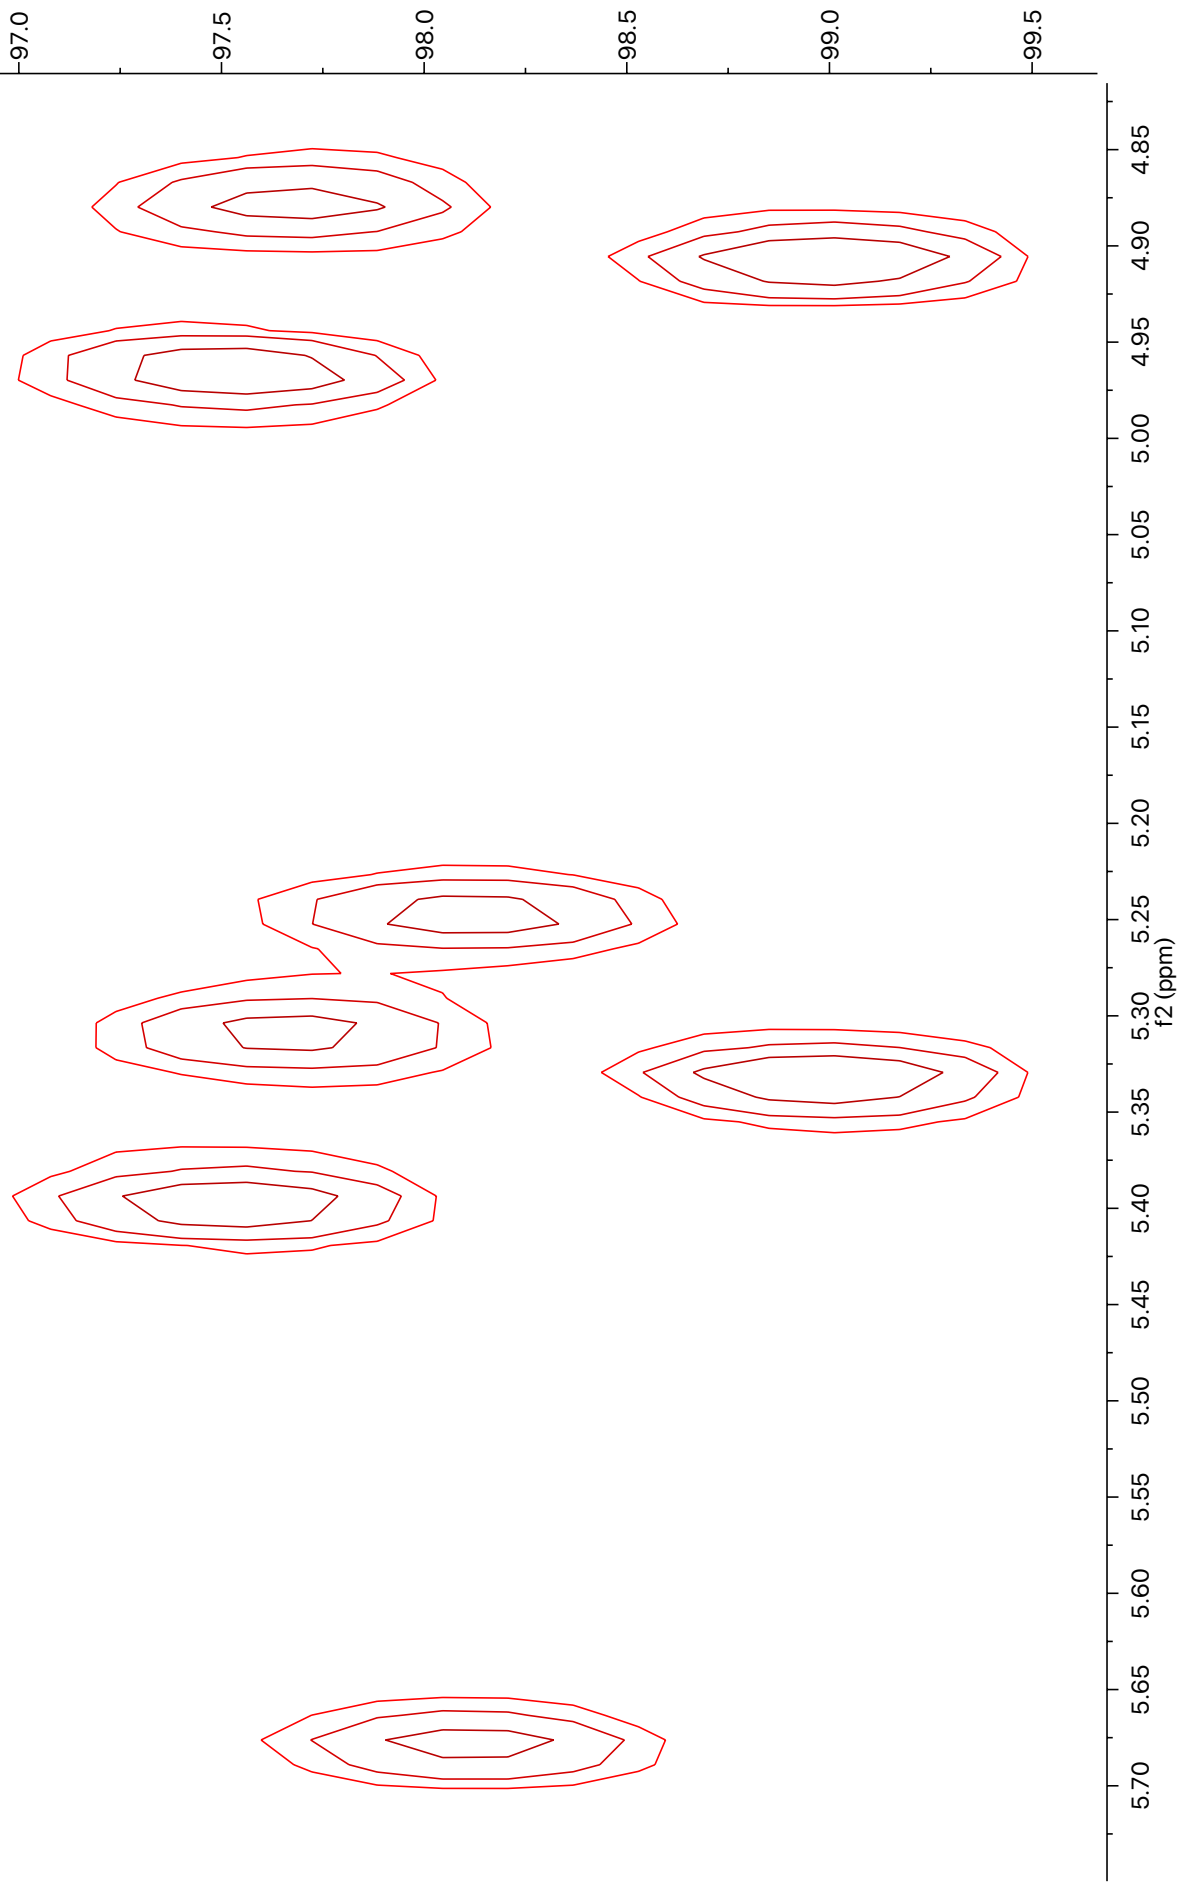

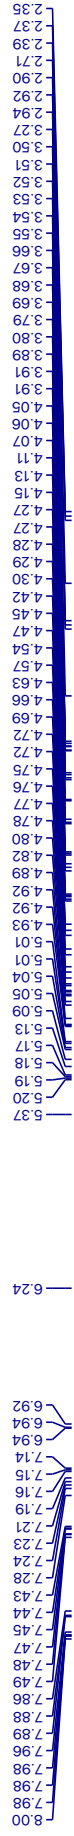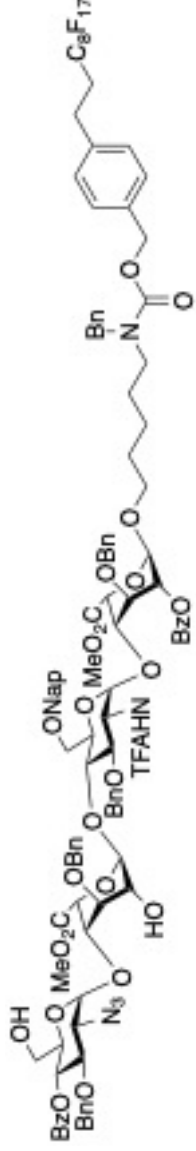

**S61**

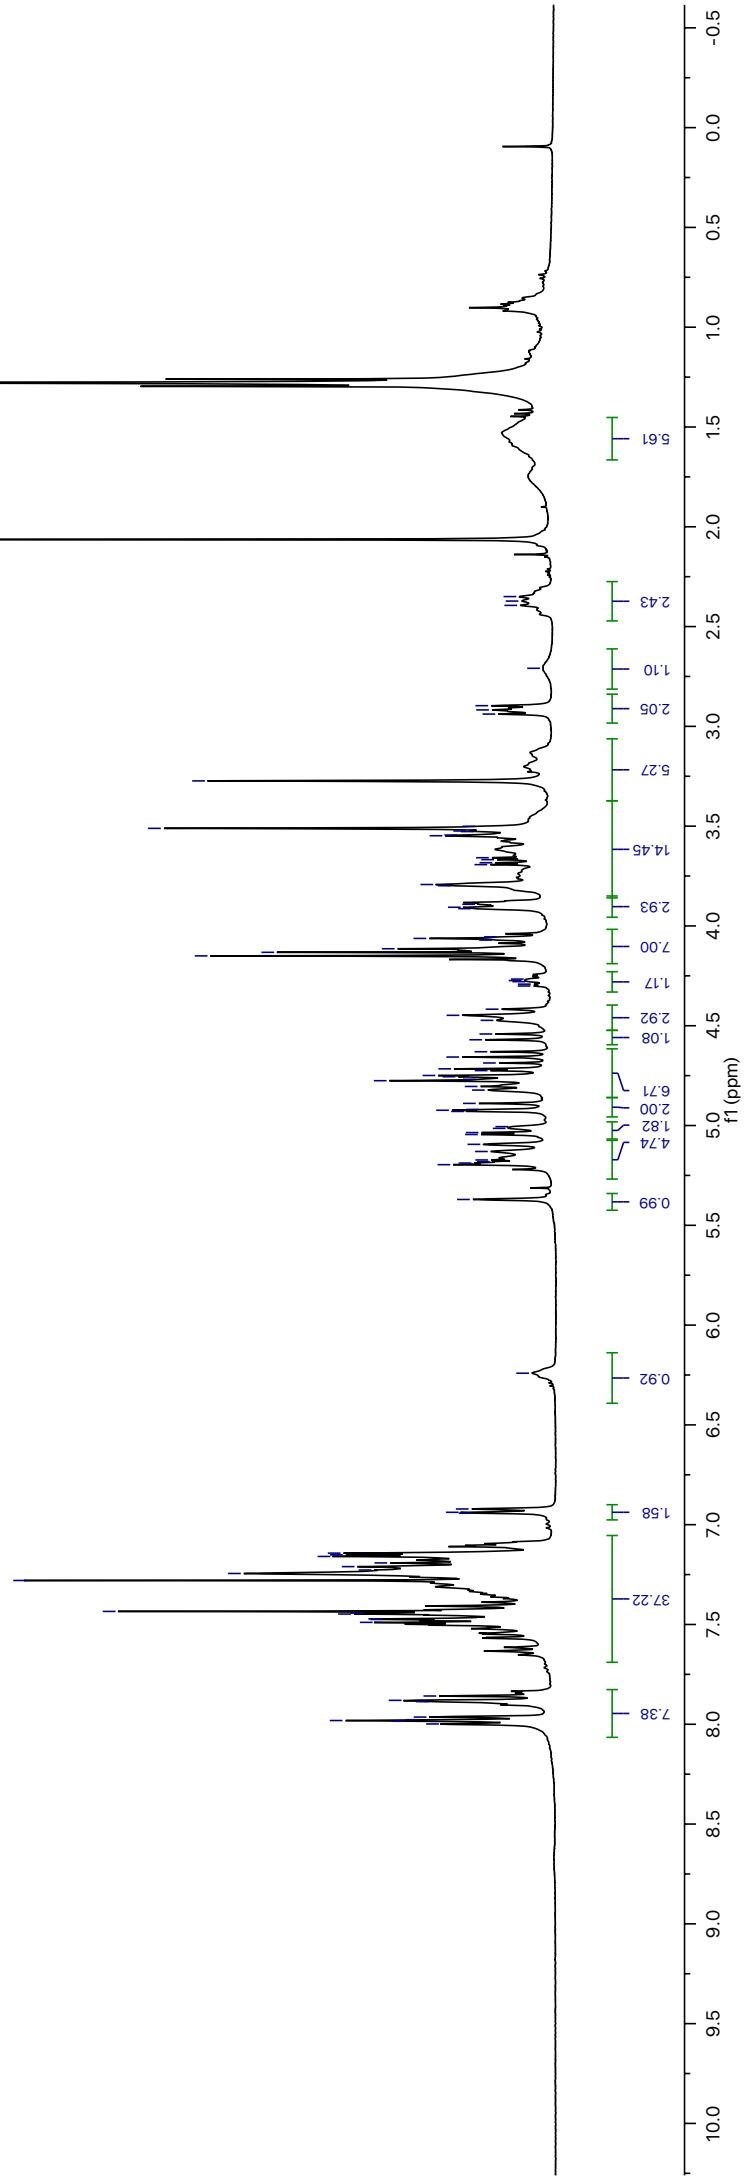



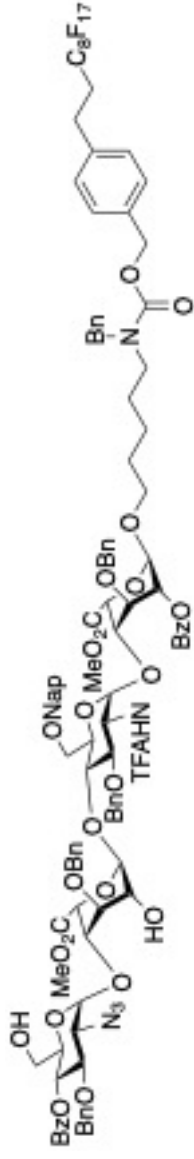

**S61**

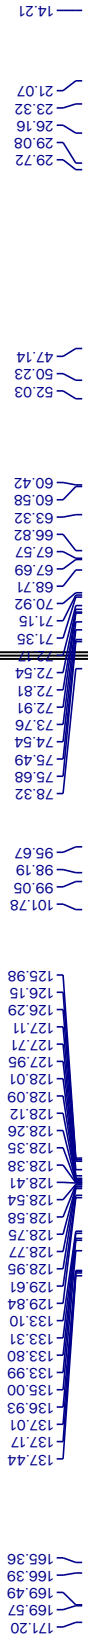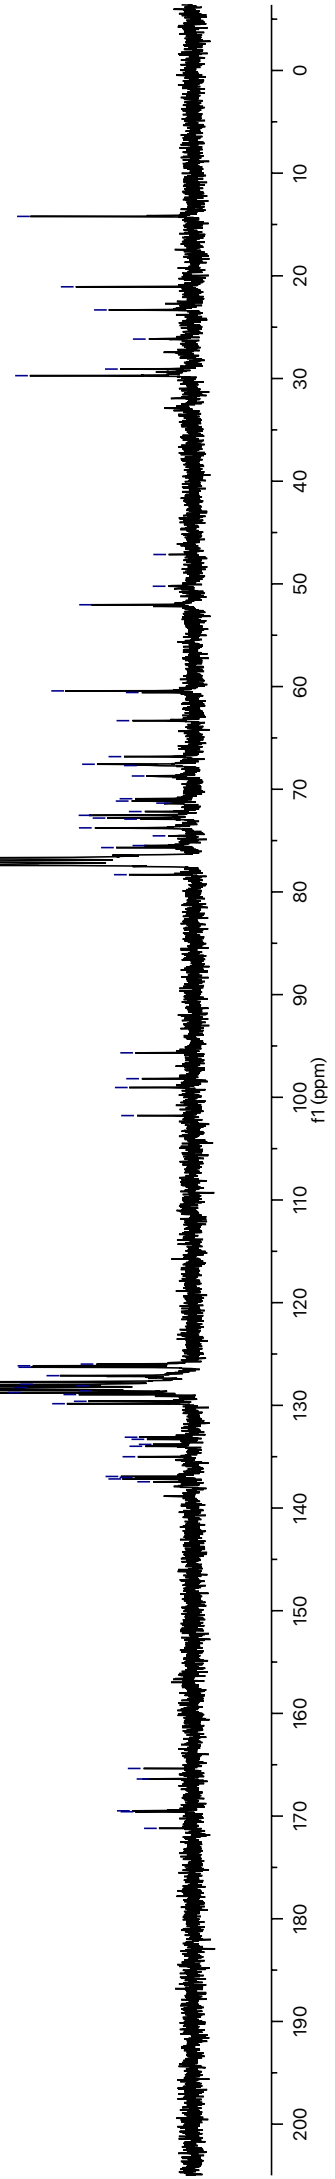

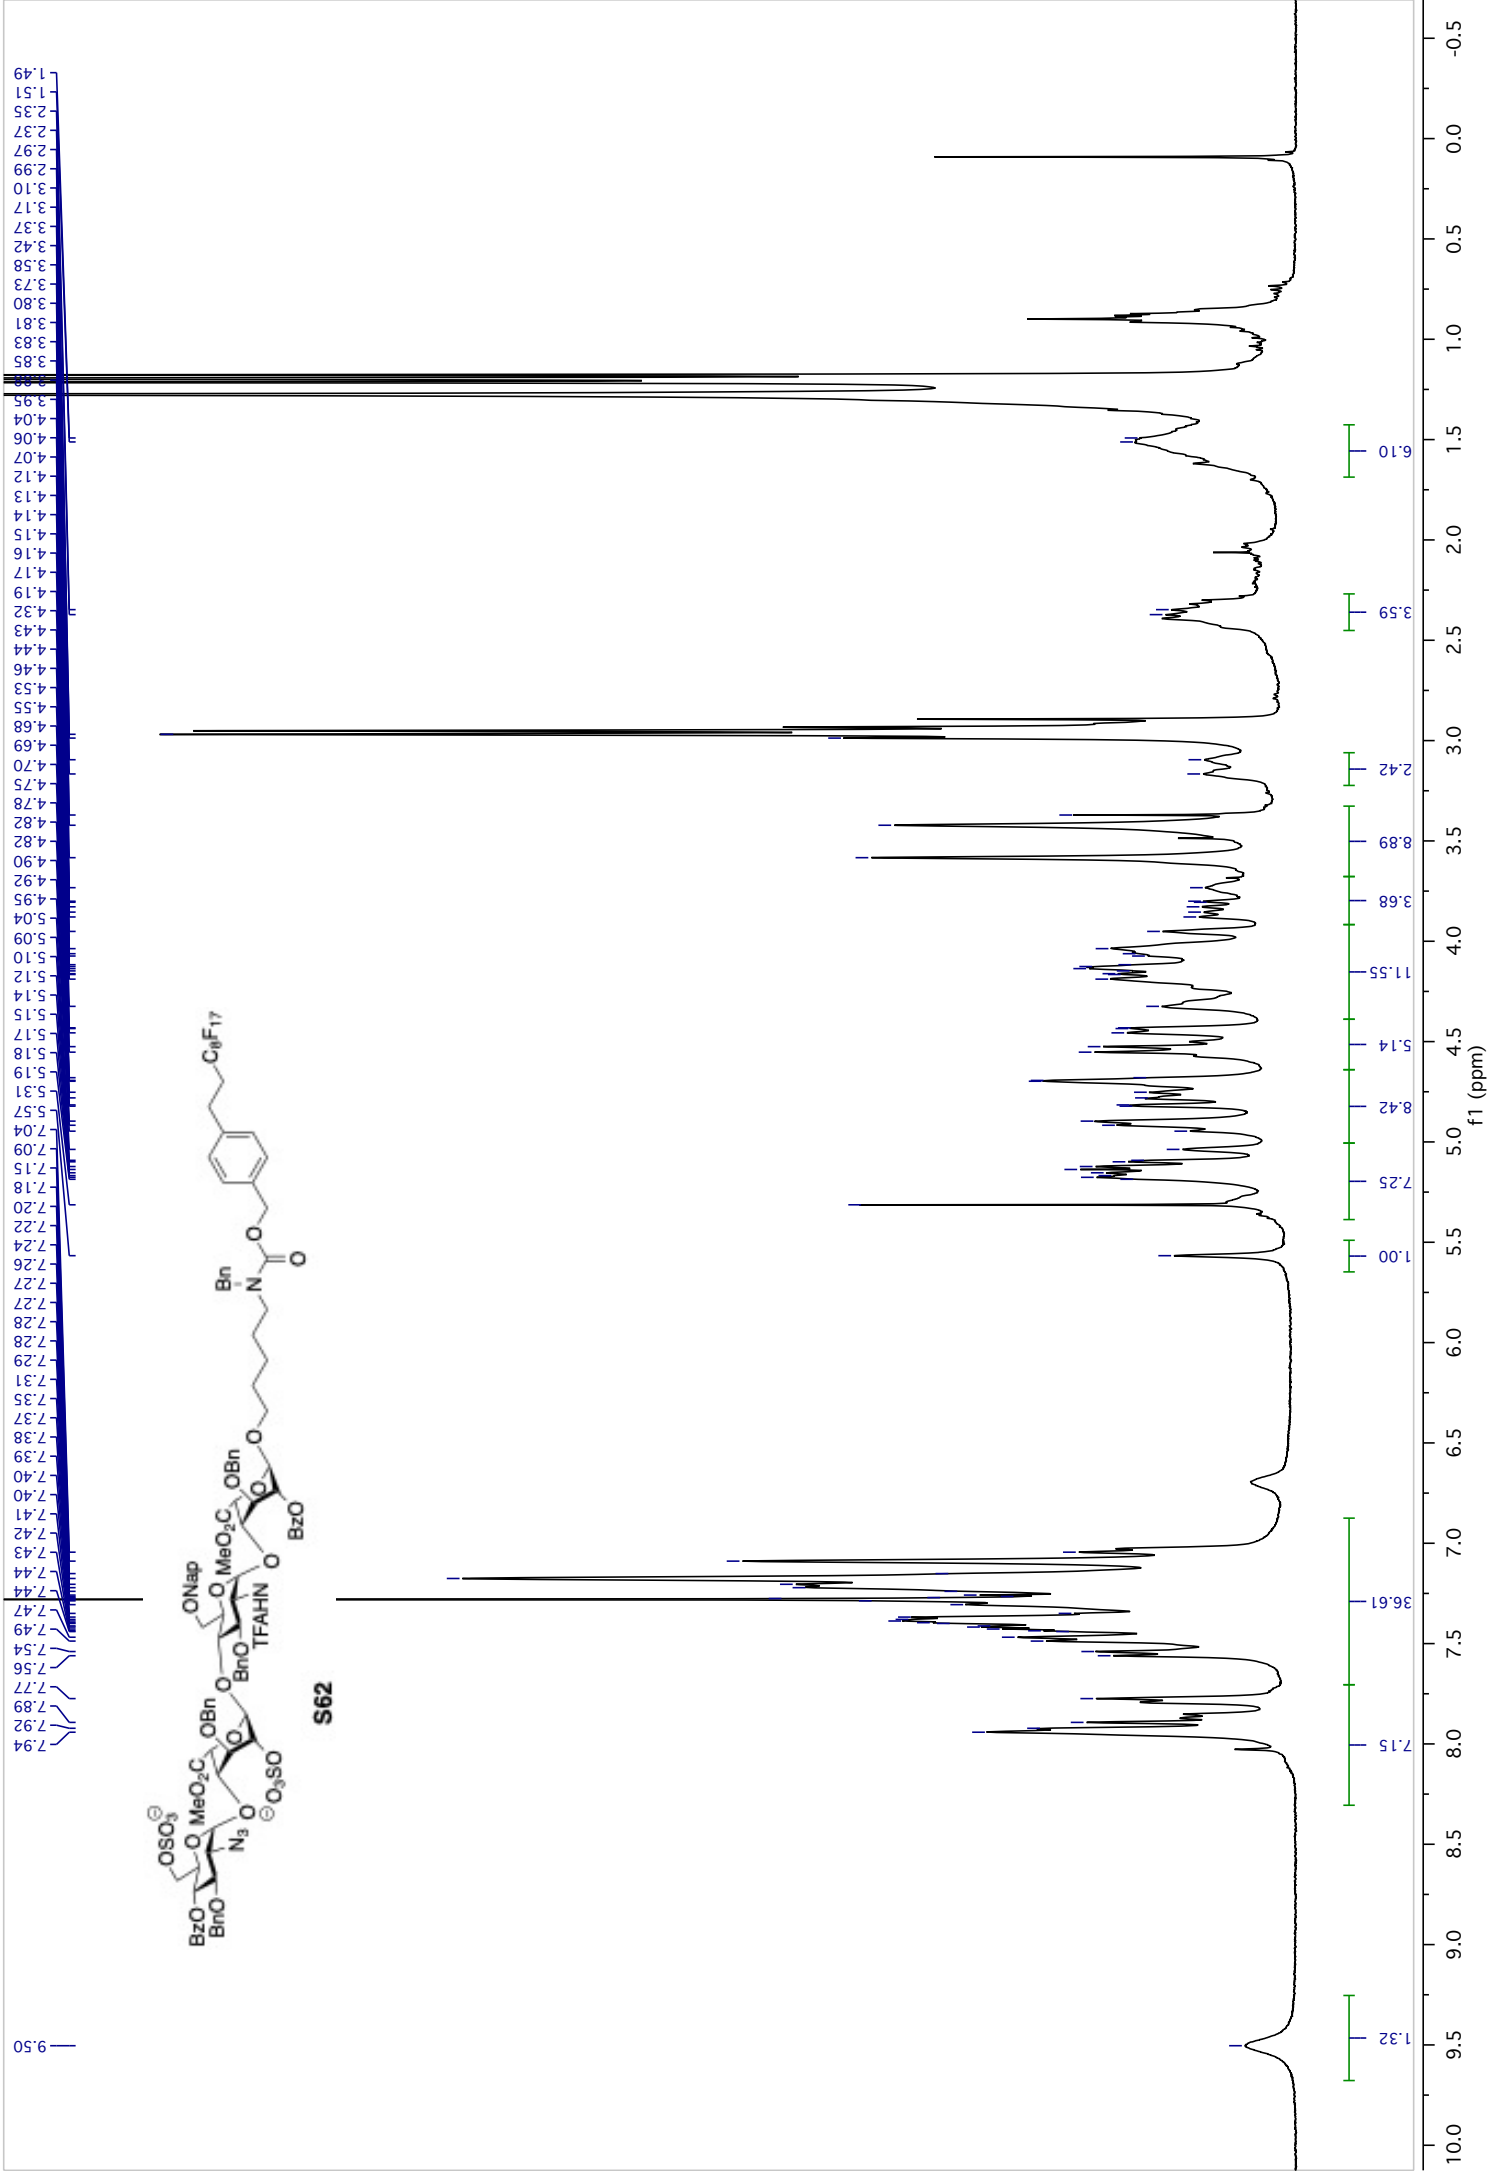

Supplement: NIHMS1977327-supplement-Supporting_Material.pdf [file NIHMS1977327-supplement-Supporting_Material.pdf]
